# Supplementary material for: Genome-wide, integrative analysis of circular RNA dysregulation and the corresponding circular RNA-microRNA-mRNA regulatory axes in autism
Source: HighWire-hosted journal article supplement (doi:10.1101/gr.255463.119), 2020-03-01
Supplement: Supplemental_Table_S1_3brainRegions.xlsx [file Supplemental_Table_S1_3brainRegions.xlsx]

## Sheet: Note
Supplemental Table S1. The clinical features and the number of the identified circRNAs for the examined samples.
FC: frontal cortex (Brodmann area 9); TC: temporal cortex (Brodmann area 22, 41, and 42); CV: cerebellar vermis
		ASD samples	CTL samples	sum
	FC	43	42	85
	TC	41	32	73
	CV	38	40	78
			Total:	236 samples
After filtered:	a sample was not considered if number of the identified circRNAs of this sample was one standard deviation below the mean of the sample set.
		ASD samples	CTL samples	sum
	FC	37	36	73
	TC	36	25	61
	CV	34	34	68
			Total:	202 samples
			Total cortex (FC/TC) samples: 134 samples

## Sheet: 236_sample
Sample ID	BrainID	RegionID	Region	ASD.CTL	Age	Sex	RIN	SeqBatch	BrainBank	PMI	Detailed_Diagnosis	# of CircRNA	# of identified circRNAs per million mapped reads
AT1	AN03345	ba9	FC	ASD	2	M	6.9	batch1	ATP	4	Autism - confirmed by ADI-R	3085	37.27
AT10	AN01570	ba9	FC	ASD	18	F	5.5	batch1	ATP	6.75	Autism - confirmed by ADI-R	2192	37.07
AT11	AN00764	ba9	FC	ASD	20	M	8.5	batch1	ATP	23.7	Autism - confirmed by ADI-R	1847	33.06
AT12	UMB5176	ba9	FC	ASD	23	M	7.2	batch3	NICHD	18	Autism - confirmed by ADI-R	1862	71.7
AT13	AN00493	ba9	FC	ASD	27	M	7.3	batch1	ATP	8.3	Autism - confirmed by ADI-R	1846	31.19
AT14	AN08166	ba9	FC	ASD	29	M	6.4	batch1	ATP	43.25	Autism - confirmed by ADI-R	2407	40.01
AT15	AN12457	ba9	FC	ASD	29	F	5.5	batch1	ATP	17.83	Autism - confirmed by ADI-R	1395	30.44
AT16	AN08792	ba9	FC	ASD	30	M	5.1	batch1	ATP	20.3	Autism - confirmed by ADI-R	1846	47.88
AT17	AN11989	ba9	FC	ASD	30	M	8	batch1	ATP	16.06	Autism - confirmed by ADI-R	3030	35.45
AT18	AN06420	ba9	FC	ASD	39	M	8	batch1	ATP	13.95	Autism - confirmed by ADI-R	3384	35.5
AT2	UMB5308	ba9	FC	ASD	4	M	7.9	batch1	NICHD	21	Autism - confirmed by ADI-R	2318	28.53
AT21	AN08043	ba9	FC	ASD	52	F	7.7	batch1	ATP	39.15	Autism - confirmed by ADI-R	3167	49.63
AT22	UMB5340	ba9	FC	ASD	53	M	8.4	batch1	NICHD	NA	Autism - confirmed by ADI-R	3388	49.3
AT23	AN09714	ba9	FC	ASD	60	M	7.6	batch1	ATP	26.5	Autism - confirmed by ADI-R	1927	48.16
AT24	AN14762	ba9	FC	ASD	9	M	8.6	batch1	ATP	13.63	Chromosome 15q Duplication Syndrome	1288	35.42
AT26	AN09402	ba9	FC	ASD	11	M	6.7	batch2	ATP	10.5	Chromosome 15q Duplication Syndrome	2309	46.56
AT28	AN17138	ba9	FC	ASD	16	M	7.2	batch1	ATP	NA	Chromosome 15q Duplication Syndrome	2633	53.81
AT29	AN03935	ba9	FC	ASD	20	M	8	batch1	ATP	28.08	Chromosome 15q Duplication Syndrome	1404	42.45
AT30	AN05983	ba9	FC	ASD	24	M	7.8	batch2	ATP	36.36	Chromosome 15q Duplication Syndrome	3282	74.81
AT31	AN14829	ba9	FC	ASD	26	F	3.5	batch3	ATP	28.67	Chromosome 15q Duplication Syndrome	2554	146.69
AT32	AN11931	ba9	FC	ASD	39	F	7.9	batch2	ATP	32.83	Chromosome 15q Duplication Syndrome	2205	68.7
AT34	UMB5303	ba9	FC	ASD	67	M	7.4	batch3	NICHD	16	Autism - supported by records	1331	54.39
AT35	UMB4999	ba9	FC	ASD	21	M	8.2	batch1	NICHD	14	Autism - Suspected	2883	48.39
AT37	UMB5027	ba9	FC	ASD	38	M	7.8	batch1	NICHD	26	Autism - Suspected	2850	42.27
AT38	UMB5023	ba9	FC	ASD	46	M	6.1	batch3	NICHD	19	Autism - suspected; diagnosis made in childhood	1636	63.91
AT39	AN03632	ba9	FC	ASD	49	F	8	batch1	ATP	21.08	Autism - suspected; no confirmation	2511	42.04
AT41	AN04682	ba9	FC	ASD	15	M	7.8	batch1	ATP	23.23	Autism - suspected; seeking records	4552	53.23
AT42	AN01971	ba9	FC	ASD	38	M	2.9	batch1	ATP	31.5	Autism - confirmed by ADI-R	1669	65.44
AT43	AN09730	ba9	FC	ASD	22	M	3.2	batch1	ATP	25	Autism - confirmed by ADI-R	2409	32.94
AT44	AN16115	ba9	FC	ASD	11	F	9.1	batch1	ATP	12.88	Autism - confirmed by ADI-R	3125	62.92
AT45	AN17515	ba9	FC	ASD	54	M	8.1	batch1	ATP	28.25	Autism - confirmed by ADI-R	2827	81.34
AT46	UMB4334	ba9	FC	ASD	11	M	9.1	batch3	NICHD	27	Autism - confirmed by ADI-R	4820	49.86
AT46	UMB4334	ba9	FC	ASD	11	M	7.9	batch1	NICHD	27	Autism - confirmed by ADI-R	4820	49.86
AT5	UMB5144	ba9	FC	ASD	7	M	8	batch1	NICHD	3	Autism - confirmed by ADI-R	2398	41.85
AT6	AN19511	ba9	FC	ASD	8	M	7.3	batch1	ATP	22.2	Autism - confirmed by ADI-R	1858	49.96
AT7	AN16641	ba9	FC	ASD	9	M	5.3	batch1	ATP	27	Autism - confirmed by ADI-R	1728	37.61
AT9	UMB5278	ba9	FC	ASD	16	F	8.3	batch1	NICHD	13	Autism - confirmed by ADI-R	2167	67.54
CT1	UMB1499	ba9	FC	CTL	4	F	6.7	batch3	NICHD	21	No known disorder	2163	60.75
CT10	AN07444	ba9	FC	CTL	17	M	3.5	batch2	ATP	30.75	No Known Disorder	2160	49.71
CT11	AN03217	ba9	FC	CTL	19	M	7.25	batch1	ATP	18.58	No Known Disorder	2540	32.72
CT13	AN07176	ba9	FC	CTL	21	M	5.75	batch1	ATP	29.91	No Known Disorder	3457	32.06
CT14	AN10833	ba9	FC	CTL	22	M	5.1	batch1	ATP	21.47	No Known Disorder	2264	30.74
CT16	AN14757	ba9	FC	CTL	24	M	8.3	batch1	ATP	21.33	No Known Disorder	2698	47.84
CT17	AN19760	ba9	FC	CTL	28	M	8	batch1	ATP	23.25	No Known Disorder	1287	29.96
CT18	AN12137	ba9	FC	CTL	31	M	4.6	batch2	ATP	32.92	No Known Disorder	2647	55.15
CT19	UMB5079	ba9	FC	CTL	33	M	7.8	batch1	NICHD	16	No Known Disorder	2949	43.01
CT2	UMB4337	ba9	FC	CTL	8	M	5.8	batch2	NICHD	16	No Known Disorder	2377	51.32
CT20	AN08161	ba9	FC	CTL	36	F	8.1	batch1	ATP	23.83	No Known Disorder	2709	44.83
CT21	UMB1376	ba9	FC	CTL	37	M	4.8	batch2	NICHD	12	No Known Disorder	2627	62.13
CT23	AN01410	ba9	FC	CTL	41	M	7.4	batch1	ATP	27.17	No Known Disorder	3430	64.7
CT24	AN10679	ba9	FC	CTL	41	F	8.4	batch1	ATP	14	No Known Disorder	3895	53.19
CT25	AN04479	ba9	FC	CTL	44	M	7.6	batch1	ATP	23.26	No Known Disorder	2523	44.68
CT26	UMB4842	ba9	FC	CTL	47	M	7.9	batch1	NICHD	12	No Known Disorder	1693	27.51
CT27	AN19442	ba9	FC	CTL	50	M	6.9	batch2	ATP	20.4	No Known Disorder	3220	73.16
CT29	UMB1578	ba9	FC	CTL	53	M	8.1	batch1	NICHD	17	No Known Disorder	3589	62.72
CT3	UMB4787	ba9	FC	CTL	13	M	6.7	batch3	NICHD	15	No known disorder	1313	51.21
CT31	AN11864	ba9	FC	CTL	57	M	7.3	batch2	ATP	22.33	No Known Disorder	1521	46.7
CT32	AN10723	ba9	FC	CTL	60	M	8.3	batch1	ATP	24.23	No Known Disorder	5221	68.38
CT33	AN00142	ba9	FC	CTL	44	M	6.2	batch2	ATP	24.61	No Known Disorder	2681	51.21
CT34	AN00544	ba9	FC	CTL	17	M	7.8	batch1	ATP	28.92	No Known Disorder	2367	41.85
CT35	AN01125	ba9	FC	CTL	56	M	7	batch1	ATP	24.17	No Known Disorder	2611	44.4
CT36	AN10028	ba9	FC	CTL	36	M	6.2	batch1	ATP	21.46	No Known Disorder	1462	23.02
CT37	AN12240	ba9	FC	CTL	51	M	7	batch1	ATP	4.75	No Known Disorder	2249	38.58
CT38	AN15566	ba9	FC	CTL	32	F	7.5	batch1	ATP	28.92	No Known Disorder	2113	27.95
CT39	UMB1185	ba9	FC	CTL	5	M	4.1	batch3	NICHD	17	No known disorder	1287	41.41
CT40	UMB1407	ba9	FC	CTL	9	F	6.7	batch3	NICHD	20	No known disorder	1970	60.44
CT41	UMB1714	ba9	FC	CTL	12	M	3.1	batch3	NICHD	22	No known disorder	1354	50.71
CT42	UMB4670	ba9	FC	CTL	5	M	6.3	batch3	NICHD	17	No known disorder	1717	53.57
CT43	UMB5391	ba9	FC	CTL	9	M	6.6	batch3	NICHD	12	No known disorder	1426	74.43
CT44	UMB5558	ba9	FC	CTL	6	M	5.2	batch3	NICHD	19	No known disorder	1293	67.82
CT6	UMB5163	ba9	FC	CTL	15	M	6.7	batch1	NICHD	12	No Known Disorder	2874	43.03
CT7	UMB5242	ba9	FC	CTL	15	M	8.4	batch1	NICHD	9	No Known Disorder	3191	41.52
CT8	AN17425	ba9	FC	CTL	16	M	6.55	batch1	ATP	26.16	No Known Disorder	3962	41.38
AT1	AN03345	ba41-42-21	TC	ASD	2	M	6.9	batch1	ATP	4	Autism - confirmed by ADI-R	2461	60.03
AT10	AN01570	ba41-42-22	TC	ASD	18	F	7.1	batch1	ATP	6.75	Autism - confirmed by ADI-R	1435	28.11
AT11	AN00764	ba41-42-22	TC	ASD	20	M	2.5	batch1	ATP	23.7	Autism - confirmed by ADI-R	1890	42.51
AT12	UMB5176	ba41-42-22	TC	ASD	22	M	5.3	batch2	NICHD	18	Autism - confirmed by ADI-R	3042	55.81
AT13	AN00493	ba41-42-22	TC	ASD	27	M	5.7	batch3	ATP	8.3	Autism - confirmed by ADI-R	1488	65.42
AT14	AN08166	ba41-42-22	TC	ASD	29	M	6.4	batch1	ATP	43.25	Autism - confirmed by ADI-R	1532	48.23
AT17	AN11989	ba41-42-22	TC	ASD	30	M	4.9	batch1	ATP	16.06	Autism - confirmed by ADI-R	2860	32.79
AT18	AN06420	ba41-42-22	TC	ASD	39	M	3.1	batch1	ATP	13.95	Autism - confirmed by ADI-R	2864	35.17
AT19	UMB5115	ba41-42-22	TC	ASD	46	M	8.2	batch1	NICHD	29	Autism - confirmed by ADI-R	3191	44.63
AT2	UMB5308	ba41-42-22	TC	ASD	4.5	M	7.65	batch1	NICHD	21	Autism - confirmed by ADI-R	3433	49.25
AT20	AN17254	ba41-42-22	TC	ASD	51	M	8.3	batch1	ATP	22.16	Autism - confirmed by ADI-R	1533	31.65
AT21	AN08043	ba41-42-22	TC	ASD	52	F	7.8	batch1	ATP	39.15	Autism - confirmed by ADI-R	1497	52.36
AT22	UMB5340	ba41-42-22	TC	ASD	53	M	8.2	batch1	NICHD	NA	Autism - confirmed by ADI-R	2736	45.86
AT23	AN09714	ba41-42-22	TC	ASD	60	M	7.2	batch1	ATP	26.5	Autism - confirmed by ADI-R	1762	42.19
AT24	AN14762	ba41-42-22	TC	ASD	9	M	8.6	batch1	ATP	13.63	Chromosome 15q Duplication Syndrome	4207	72.78
AT25	AN06365	ba41-42-22	TC	ASD	10	M	8	batch1	ATP	17.7	Chromosome 15q Duplication Syndrome	2199	36.76
AT26	AN09402	ba41-42-22	TC	ASD	11	M	7.5	batch1	ATP	10.5	Chromosome 15q Duplication Syndrome	2281	35.85
AT29	AN03935	ba41-42-22	TC	ASD	20	M	7.9	batch1	ATP	28.08	Chromosome 15q Duplication Syndrome	3238	39.16
AT3	AN08873	ba41-42-22	TC	ASD	5	M	9.1	batch1	ATP	25.5	Autism - confirmed by ADI-R	3384	74.87
AT30	AN05983	ba41-42-22	TC	ASD	24	M	8.7	batch1	ATP	36.36	Chromosome 15q Duplication Syndrome	2082	50.84
AT31	AN14829	ba41-42-22	TC	ASD	26	F	6.2	batch1	ATP	28.67	Chromosome 15q Duplication Syndrome	1967	65.24
AT32	AN11931	ba41-42-22	TC	ASD	39	F	8.5	batch1	ATP	32.83	Chromosome 15q Duplication Syndrome	5420	68.8
AT33	UMB5302	ba41-42-22	TC	ASD	16	M	3.7	batch1	NICHD	20	Autism - supported by records	1188	30.64
AT34	UMB5303	ba41-42-22	TC	ASD	67	M	8.5	batch1	NICHD	16	Autism - supported by records	3450	48.16
AT35	UMB4999	ba41-42-22	TC	ASD	21	M	8.4	batch1	NICHD	14	Autism - Suspected	1962	47.17
AT36	UMB5297	ba41-42-22	TC	ASD	33	M	6.7	batch1	NICHD	50	Autism - Suspected	2268	40.14
AT37	UMB5027	ba41-42-22	TC	ASD	38	M	8.5	batch1	NICHD	26	Autism - Suspected	4069	68.47
AT39	AN03632	ba41-42-22	TC	ASD	49	F	8.1	batch1	ATP	21.08	Autism - suspected; no confirmation	4238	45.4
AT4	AN13872	ba41-42-22	TC	ASD	5	F	6.9	batch1	ATP	33	Autism - confirmed by ADI-R	2634	37.77
AT40	AN02987	ba41-42-22	TC	ASD	15	M	8.6	batch1	ATP	30.8	Autism - suspected; seeking records	2610	52
AT41	AN04682	ba41-42-22	TC	ASD	15	M	8.2	batch1	ATP	23.23	Autism - suspected; seeking records	2947	51.12
AT5	UMB5144	ba41-42-22	TC	ASD	7	M	7.7	batch1	NICHD	3	Autism - confirmed by ADI-R	3098	49.84
AT6	AN19511	ba41-42-22	TC	ASD	8	M	8.3	batch1	ATP	22.2	Autism - confirmed by ADI-R	1292	46.39
AT7	AN16641	ba41-42-22	TC	ASD	9	M	4.7	batch1	ATP	27	Autism - confirmed by ADI-R	1878	46.58
AT8	AN17678	ba41-42-22	TC	ASD	11	M	2.7	batch3	ATP	NA	Autism - confirmed by ADI-R	1496	48.19
AT9	UMB5278	ba41-42-22	TC	ASD	16	F	7.8	batch1	NICHD	13	Autism - confirmed by ADI-R	2405	55.12
CT10	AN07444	ba41-42-22	TC	CTL	17	M	8.2	batch1	ATP	30.75	No Known Disorder	2764	66.69
CT11	AN03217	ba41-42-22	TC	CTL	19	M	6.7	batch1	ATP	18.58	No Known Disorder	3378	30.9
CT12	UMB4590	ba41-42-22	TC	CTL	20	M	8.3	batch1	NICHD	19	No Known Disorder	2389	38.38
CT13	AN07176	ba41-42-22	TC	CTL	21	M	6.65	batch1	ATP	29.91	No Known Disorder	5378	36.26
CT15	UMB5342	ba41-42-22	TC	CTL	23	M	7.7	batch1	NICHD	14	No Known Disorder	1266	31.8
CT16	AN14757	ba41-42-22	TC	CTL	24	M	5.5	batch1	ATP	21.33	No Known Disorder	5022	48.77
CT17	AN19760	ba41-42-22	TC	CTL	28	M	6.1	batch1	ATP	23.25	No Known Disorder	1475	31.1
CT18	AN12137	ba41-42-22	TC	CTL	31	M	6.4	batch1	ATP	32.92	No Known Disorder	3869	54.8
CT19	UMB5079	ba41-42-22	TC	CTL	33	M	7.9	batch1	NICHD	16	No Known Disorder	1491	24.43
CT2	UMB4337	ba41-42-22	TC	CTL	8	M	5.8	batch2	NICHD	16	No Known Disorder	2225	59.13
CT20	AN08161	ba41-42-22	TC	CTL	36	F	8.1	batch1	ATP	23.83	No Known Disorder	1331	47.21
CT21	UMB1376	ba41-42-22	TC	CTL	37	M	5	batch2	NICHD	12	No Known Disorder	1930	42.38
CT22	AN08677	ba41-42-22	TC	CTL	38	M	8	batch1	ATP	25.47	No Known Disorder	3175	71.97
CT23	AN01410	ba41-42-22	TC	CTL	41	M	7.4	batch1	ATP	27.17	No Known Disorder	2955	32.96
CT25	AN04479	ba41-42-22	TC	CTL	44	M	7.05	batch1	ATP	23.26	No Known Disorder	3921	27.96
CT26	UMB4842	ba41-42-22	TC	CTL	47	M	8.1	batch1	NICHD	12	No Known Disorder	1960	47.09
CT27	AN19442	ba41-42-22	TC	CTL	50	M	5.5	batch3	ATP	20.4	No Known Disorder	1318	52.69
CT28	AN15088	ba41-42-22	TC	CTL	52	F	4.2	batch2	ATP	17.88	No Known Disorder	1957	53.18
CT29	UMB1578	ba41-42-22	TC	CTL	53	M	8.1	batch1	NICHD	17	No Known Disorder	2382	42.22
CT30	AN13295	ba41-42-22	TC	CTL	56	M	6.3	batch1	ATP	22.12	No Known Disorder	2480	35.24
CT31	AN11864	ba41-42-22	TC	CTL	57	M	5.4	batch2	ATP	22.33	No Known Disorder	2894	57.35
CT32	AN10723	ba41-42-22	TC	CTL	60	M	8.7	batch1	ATP	24.23	No Known Disorder	3487	83.35
CT4	UMB1908	ba41-42-22	TC	CTL	14	M	6.5	batch3	NICHD	13	No known disorder	2212	61.27
CT5	UMB5309	ba41-42-22	TC	CTL	14	F	6.6	batch3	NICHD	8	No known disorder	1276	42
CT8	AN17425	ba41-42-22	TC	CTL	16	M	6.75	batch1	ATP	26.16	No Known Disorder	4450	48.96
AT10	AN01570	vermis	CV	ASD	18	F	5.8	batch1	ATP	6.75	Autism - confirmed by ADI-R	3992	61.5
AT11	AN00764	vermis	CV	ASD	20	M	6.8	batch1	ATP	23.7	Autism - confirmed by ADI-R	2515	70.49
AT12	UMB5176	vermis	CV	ASD	23	M	8.1	batch1	NICHD	18	Autism - confirmed by ADI-R	3221	68.79
AT13	AN00493	vermis	CV	ASD	27	M	7	batch1	ATP	8.3	Autism - confirmed by ADI-R	3255	57.23
AT14	AN08166	vermis	CV	ASD	29	M	7.6	batch1	ATP	43.25	Autism - confirmed by ADI-R	6929	101.5
AT17	AN11989	vermis	CV	ASD	30	M	6.1	batch1	ATP	16.06	Autism - confirmed by ADI-R	5910	38.1
AT18	AN06420	vermis	CV	ASD	39	M	6.6	batch1	ATP	13.95	Autism - confirmed by ADI-R	7689	83.51
AT19	UMB5115	vermis	CV	ASD	46	M	8.1	batch1	NICHD	29	Autism - confirmed by ADI-R	2123	35
AT2	UMB5308	vermis	CV	ASD	4	M	8.3	batch1	NICHD	21	Autism - confirmed by ADI-R	3519	83.59
AT21	AN08043	vermis	CV	ASD	52	F	8.2	batch1	ATP	39.15	Autism - confirmed by ADI-R	5769	103.27
AT22	UMB5340	vermis	CV	ASD	53	M	8.1	batch1	NICHD	NA	Autism - confirmed by ADI-R	3899	62.76
AT23	AN09714	vermis	CV	ASD	60	M	6.4	batch1	ATP	26.5	Autism - confirmed by ADI-R	2235	45.17
AT24	AN14762	vermis	CV	ASD	9	M	8.5	batch1	ATP	13.63	Chromosome 15q Duplication Syndrome	4918	76.71
AT26	AN09402	vermis	CV	ASD	11	M	8	batch1	ATP	10.5	Chromosome 15q Duplication Syndrome	3628	62.63
AT3	AN08873	vermis	CV	ASD	5	M	6.2	batch1	ATP	25.5	Autism - confirmed by ADI-R	2860	68.87
AT30	AN05983	vermis	CV	ASD	24	M	7.9	batch1	ATP	36.36	Chromosome 15q Duplication Syndrome	3267	79.41
AT31	AN14829	vermis	CV	ASD	26	F	5.7	batch3	ATP	28.67	Chromosome 15q Duplication Syndrome	1831	63.76
AT34	UMB5303	vermis	CV	ASD	67	M	7.1	batch1	NICHD	16	Autism - supported by records	2540	44.32
AT35	UMB4999	vermis	CV	ASD	21	M	8.4	batch1	NICHD	14	Autism - Suspected	4606	72.38
AT37	UMB5027	vermis	CV	ASD	38	M	8.1	batch1	NICHD	26	Autism - Suspected	5258	99.26
AT38	UMB5023	vermis	CV	ASD	46	M	7.4	batch3	NICHD	19	Autism - suspected; diagnosis made in childhood	2935	84.25
AT39	AN03632	vermis	CV	ASD	49	F	6.7	batch1	ATP	21.08	Autism - suspected; no confirmation	2135	34.41
AT4	AN13872	vermis	CV	ASD	5	F	7.8	batch1	ATP	33	Autism - confirmed by ADI-R	2953	98.66
AT41	AN04682	vermis	CV	ASD	15	M	8	batch1	ATP	23.23	Autism - suspected; seeking records	2002	58.62
AT44	AN16115	vermis	CV	ASD	11	F	7.9	batch1	ATP	12.88	Autism - confirmed by ADI-R	3637	61.52
AT45	AN17515	vermis	CV	ASD	54	M	8.1	batch1	ATP	28.25	Autism - confirmed by ADI-R	2520	84.95
AT46	UMB4334	vermis	CV	ASD	11	M	9.1	batch3	NICHD	27	Autism - confirmed by ADI-R	2106	76.25
AT47	UMB4849	vermis	CV	ASD	7	M	8.1	batch1	NICHD	20	Autism - confirmed by ADI-R	2110	61.13
AT48	AN01093	vermis	CV	ASD	58	M	2.3	batch1	ATP	19.48	Autism - confirmed by ADI-R	2745	66.68
AT5	UMB5144	vermis	CV	ASD	7	M	8.2	batch1	NICHD	3	Autism - confirmed by ADI-R	5412	100.69
AT6	AN19511	vermis	CV	ASD	8	M	7.7	batch1	ATP	22.2	Autism - confirmed by ADI-R	4150	87.76
AT7	AN16641	vermis	CV	ASD	9	M	6.3	batch1	ATP	27	Autism - confirmed by ADI-R	2701	43.19
AT8	AN17678	vermis	CV	ASD	11	M	8.4	batch1	ATP	NA	Autism - confirmed by ADI-R	9665	157.75
AT9	UMB5278	vermis	CV	ASD	16	F	8.2	batch1	NICHD	13	Autism - confirmed by ADI-R	7539	100.15
CT1	UMB1499	vermis	CV	CTL	4	F	2.7	batch3	NICHD	21	No known disorder	1782	48.92
CT11	AN03217	vermis	CV	CTL	19	M	6.5	batch1	ATP	18.58	No Known Disorder	3052	42.54
CT12	UMB4590	vermis	CV	CTL	20	M	8.5	batch1	NICHD	19	No Known Disorder	2041	77.94
CT14	AN10833	vermis	CV	CTL	22	M	8	batch1	ATP	21.47	No Known Disorder	3305	48.55
CT15	UMB5342	vermis	CV	CTL	23	M	7.7	batch1	NICHD	14	No Known Disorder	5657	72.16
CT16	AN14757	vermis	CV	CTL	24	M	7.85	batch1	ATP	21.33	No Known Disorder	5676	69.41
CT17	AN19760	vermis	CV	CTL	28	M	6.8	batch1	ATP	23.25	No Known Disorder	2211	43.34
CT18	AN12137	vermis	CV	CTL	31	M	7.3	batch1	ATP	32.92	No Known Disorder	2690	74.07
CT2	UMB4337	vermis	CV	CTL	8	M	8.6	batch1	NICHD	16	No Known Disorder	3985	89.39
CT20	AN08161	vermis	CV	CTL	36	F	7.3	batch3	ATP	23.83	No Known Disorder	4778	62.24
CT21	UMB1376	vermis	CV	CTL	37	M	8.3	batch1	NICHD	12	No Known Disorder	4543	73
CT22	AN08677	vermis	CV	CTL	38	M	8.3	batch1	ATP	25.47	No Known Disorder	5079	81.32
CT24	AN10679	vermis	CV	CTL	41	F	8.2	batch1	ATP	14	No Known Disorder	2312	81.51
CT26	UMB4842	vermis	CV	CTL	47	M	4.7	batch2	NICHD	12	No Known Disorder	3565	73.69
CT29	UMB1578	vermis	CV	CTL	53	M	8	batch1	NICHD	17	No Known Disorder	7236	75.24
CT30	AN13295	vermis	CV	CTL	56	M	8.3	batch1	ATP	22.12	No Known Disorder	2364	49.51
CT31	AN11864	vermis	CV	CTL	57	M	7.1	batch2	ATP	22.33	No Known Disorder	3201	61.35
CT32	AN10723	vermis	CV	CTL	60	M	8.2	batch1	ATP	24.23	No Known Disorder	5143	83.68
CT33	AN00142	vermis	CV	CTL	44	M	7.8	batch1	ATP	24.61	No Known Disorder	2497	34.94
CT35	AN01125	vermis	CV	CTL	56	M	5.9	batch1	ATP	24.17	No Known Disorder	2908	36.89
CT36	AN10028	vermis	CV	CTL	36	M	7.8	batch1	ATP	21.46	No Known Disorder	6535	77.64
CT37	AN12240	vermis	CV	CTL	51	M	8.1	batch1	ATP	4.75	No Known Disorder	5235	61.83
CT38	AN15566	vermis	CV	CTL	32	F	7.5	batch1	ATP	28.92	No Known Disorder	3614	55.17
CT4	UMB1908	vermis	CV	CTL	14	M	6.4	batch3	NICHD	13	No known disorder	2502	132.47
CT41	UMB1714	vermis	CV	CTL	12	M	6.3	batch3	NICHD	22	No known disorder	2102	83.18
CT42	UMB4670	vermis	CV	CTL	5	M	6.4	batch3	NICHD	17	No known disorder	3258	126.38
CT45	UMB1670	vermis	CV	CTL	13	M	6.1	batch3	NICHD	5	No known disorder	2795	96.36
CT46	UMB1793	vermis	CV	CTL	12	M	6.2	batch3	NICHD	19	No known disorder	1940	51.92
CT47	UMB1860	vermis	CV	CTL	8	M	7	batch3	NICHD	5	No known disorder	2130	63.7
CT48	UMB4722	vermis	CV	CTL	15	M	2.3	batch3	NICHD	16	No known disorder	2227	61.25
CT49	UMB5282	vermis	CV	CTL	3	M	4.9	batch3	NICHD	16	No known disorder	1823	49.86
CT7	UMB5242	vermis	CV	CTL	15	M	7.35	batch3	NICHD	9	No Known Disorder	5420	81.82
CT8	AN17425	vermis	CV	CTL	16	M	6.7	batch1	ATP	26.16	No Known Disorder	3306	22.31
CT9	UMB5168	vermis	CV	CTL	16	F	7.4	batch1	NICHD	0	No Known Disorder	2665	43.52
AT19	UMB5115	ba9	FC	ASD	46	M	6.2	batch1	NICHD	29	Autism - confirmed by ADI-R	1234	32.67
AT20	AN17254	ba9	FC	ASD	51	M	7.2	batch1	ATP	22.16	Autism - confirmed by ADI-R	743	23.58
AT27	AN15451	ba9	FC	ASD	16	M	4.2	batch3	ATP	39.91	Chromosome 15q Duplication Syndrome	764	30.06
AT36	UMB5297	ba9	FC	ASD	33	M	5.6	batch1	NICHD	50	Autism - Suspected	605	28.92
AT4	AN13872	ba9	FC	ASD	5	F	6.9	batch1	ATP	33	Autism - confirmed by ADI-R	1129	35.79
AT47	UMB4849	ba9	FC	ASD	7	M	7.4	batch1	NICHD	20	Autism - confirmed by ADI-R	558	21.85
CT12	UMB4590	ba9	FC	CTL	20	M	8.3	batch1	NICHD	19	No Known Disorder	671	23.87
CT15	UMB5342	ba9	FC	CTL	23	M	7.9	batch1	NICHD	14	No Known Disorder	1118	33.38
CT28	AN15088	ba9	FC	CTL	52	F	7.7	batch1	ATP	17.88	No Known Disorder	797	47.91
CT30	AN13295	ba9	FC	CTL	56	M	6.3	batch1	ATP	22.12	No Known Disorder	1247	40.95
CT5	UMB5309	ba9	FC	CTL	14	F	5.9	batch3	NICHD	8	No known disorder	1115	39.98
CT9	UMB5168	ba9	FC	CTL	16	F	7.3	batch1	NICHD	0	No Known Disorder	1157	31.82
AT15	AN12457	ba41-42-22	TC	ASD	29	F	6	batch1	ATP	17.83	Autism - confirmed by ADI-R	1071	21
AT16	AN08792	ba41-42-22	TC	ASD	30	M	5.1	batch1	ATP	20.3	Autism - confirmed by ADI-R	1018	48.77
AT27	AN15451	ba41-42-22	TC	ASD	16	M	4.8	batch3	ATP	39.91	Chromosome 15q Duplication Syndrome	576	32.16
AT28	AN17138	ba41-42-22	TC	ASD	16	M	7.2	batch1	ATP	NA	Chromosome 15q Duplication Syndrome	1128	62.83
AT38	UMB5023	ba41-42-22	TC	ASD	46	M	6.6	batch3	NICHD	19	Autism - suspected; diagnosis made in childhood	983	50.34
CT1	UMB1499	ba41-42-22	TC	CTL	4	F	5.9	batch3	NICHD	21	No known disorder	1048	30.61
CT14	AN10833	ba41-42-22	TC	CTL	22	M	1.8	batch1	ATP	21.47	No Known Disorder	866	29.16
CT24	AN10679	ba41-42-22	TC	CTL	41	F	8.4	batch1	ATP	14	No Known Disorder	388	25.3
CT3	UMB4787	ba41-42-22	TC	CTL	13	M	6.1	batch3	NICHD	15	No known disorder	760	37.29
CT6	UMB5163	ba41-42-22	TC	CTL	15	M	8.1	batch1	NICHD	12	No Known Disorder	239	17.08
CT7	UMB5242	ba41-42-22	TC	CTL	15	M	8.1	batch1	NICHD	9	No Known Disorder	998	32.52
CT9	UMB5168	ba41-42-22	TC	CTL	16	F	7	batch1	NICHD	0	No Known Disorder	378	11.09
AT20	AN17254	vermis	CV	ASD	51	M	5.7	batch1	ATP	22.16	Autism - confirmed by ADI-R	1267	28.72
AT27	AN15451	vermis	CV	ASD	16	M	6.3	batch3	ATP	39.91	Chromosome 15q Duplication Syndrome	1569	46.61
AT36	UMB5297	vermis	CV	ASD	33	M	5	batch3	NICHD	50	Autism - Suspected	1214	37.54
AT40	AN02987	vermis	CV	ASD	15	M	8.2	batch1	ATP	30.8	Autism - suspected; seeking records	744	38.48
CT10	AN07444	vermis	CV	CTL	17	M	8.3	batch1	ATP	30.75	No Known Disorder	666	41.5
CT19	UMB5079	vermis	CV	CTL	33	M	8.3	batch1	NICHD	16	No Known Disorder	1439	81.69
CT23	AN01410	vermis	CV	CTL	41	M	7.9	batch1	ATP	27.17	No Known Disorder	1280	29.89
CT3	UMB4787	vermis	CV	CTL	13	M	6.1	batch3	NICHD	15	No known disorder	1552	54.24
CT5	UMB5309	vermis	CV	CTL	14	F	5.1	batch3	NICHD	8	No known disorder	1237	48.74
CT6	UMB5163	vermis	CV	CTL	15	M	6.5	batch1	NICHD	12	No Known Disorder	1162	48.01
