# Supplementary material for: Genome-wide, integrative analysis of circular RNA dysregulation and the corresponding circular RNA-microRNA-mRNA regulatory axes in autism
Source: HighWire-hosted journal article supplement (doi:10.1101/gr.255463.119), 2020-03-01
Supplement: Supplemental_Table_S2_new.xlsx [file Supplemental_Table_S2_new.xlsx]

## Sheet: Note
Supplemental Table S2. The identified circRNAs in the examined samples.
ATxx: ID for an ASD sample
CTxx: ID for a non-ASD control sample
TC, FC, and CV represent temporal cortex, frontal cortex, and cerebellar vermis samples, respectively.
The circRNA expression in each sample was provided, which was measured by the number of supporting backspliced junction reads per million uniquely mapped reads (RPM).
Total number of TC, FC, and CV samples: 202 samples
Total number of TC and FC samples: 134 samples

## Sheet: circRNA_expression (RPM)
Chr#	Donor	Acceptor	Strand	Host gene symbol	Was this circRNA detected in cortex (FC/TC) samples? (1:yes)	# of the 134 cortex samples that were observed to have this circRNA	AT10.TC	AT11.TC	AT12.TC	AT13.TC	AT14.TC	AT17.TC	AT18.TC	AT19.TC	AT1.TC	AT20.TC	AT21.TC	AT22.TC	AT23.TC	AT24.TC	AT25.TC	AT26.TC	AT29.TC	AT2.TC	AT30.TC	AT31.TC	AT32.TC	AT33.TC	AT34.TC	AT35.TC	AT36.TC	AT37.TC	AT39.TC	AT3.TC	AT40.TC	AT41.TC	AT4.TC	AT5.TC	AT6.TC	AT7.TC	AT8.TC	AT9.TC	CT10.TC	CT11.TC	CT12.TC	CT13.TC	CT15.TC	CT16.TC	CT17.TC
chr1	26732792	26729651	+	ARID1A	1	94	0.0398956	0.018373	0.0155723	0.0489018	0	0.0358841	0.0313477	0.056511	0	0.0162073	0.0225478	0.0411091	0.058649	0.0290444	0	0.026796	0.0209997	0.0468941	0.0207708	0	0	0.0533777	0.0206962	0.01967	0.0863405	0.0128174	0	0.0148968	0.0304037	0.0104822	0.0204954	0.0127873	0	0.0395013	0.0564602	0.0174408	0	0.0231969	0.0131307	0.034368	0.0575406	0.00800603	0.030478
chr10	100190869	100205199	-	CHUK	1	1	0	0	0	0	0	0	0	0	0	0	0	0	0	0	0	0	0	0	0	0	0	0	0	0	0	0	0	0.0148968	0	0	0	0	0	0	0	0	0	0	0	0	0	0	0
chr10	100926019	100915999	+	SLF2	1	25	0	0	0	0	0	0	0.0104492	0.0339066	0	0	0	0	0	0	0	0	0	0	0	0	0.0105441	0	0	0	0	0.0128174	0	0	0	0	0	0	0	0	0	0	0	0	0	0	0	0.00800603	0
chr10	105147796	105105397	+	SORCS3	1	3	0	0	0	0	0	0	0.0104492	0	0	0	0	0	0	0	0	0	0.0104998	0	0	0	0	0	0	0	0	0	0	0	0	0	0	0	0	0	0	0	0	0	0	0	0	0	0
chr10	68886618	68884260	+	STOX1	1	3	0	0	0	0	0	0	0.0208984	0	0	0	0	0	0	0	0	0	0	0	0	0	0	0	0	0	0	0	0	0	0	0	0	0	0	0	0	0	0	0	0	0	0	0	0
chr16	74477396	74480394	-	GLG1	1	5	0	0	0	0	0	0	0	0	0	0	0	0	0.0195497	0	0	0	0	0	0	0	0	0	0	0	0	0	0	0	0	0	0	0	0	0	0	0	0	0	0	0	0	0	0
chr16	74496441	74508925	-	GLG1	1	6	0	0	0	0	0	0	0	0	0	0	0	0	0	0.0145222	0	0	0	0	0	0	0	0	0.0103481	0	0	0	0.00847806	0	0	0	0	0	0	0	0	0	0	0	0	0	0	0	0
chr16	74644362	74661451	-	RFWD3	1	1	0	0	0	0	0	0	0	0	0	0.0162073	0	0	0	0	0	0	0	0	0	0	0	0	0	0	0	0	0	0	0	0	0	0	0	0	0	0	0	0	0	0	0	0	0
chr16	74915870	74916259	-	WDR59	1	12	0	0	0	0	0	0	0	0	0	0	0	0	0	0	0	0.013398	0	0	0	0	0.0105441	0	0	0.01967	0	0	0	0	0	0	0	0	0	0	0	0	0	0	0	0.005728	0	0	0
chr16	74923926	74951543	-	WDR59	1	1	0	0	0	0	0	0	0	0	0	0	0	0	0	0	0	0	0	0	0	0	0	0	0	0	0	0	0.00847806	0	0	0	0	0	0	0	0	0	0	0	0	0	0	0	0
chr16	74938150	74951543	-	WDR59	1	8	0	0	0	0	0	0	0	0	0	0	0	0	0	0	0	0	0	0	0	0	0	0	0	0	0	0	0	0	0	0	0	0	0	0	0	0	0	0	0	0	0	0	0
chr16	74938150	74956610	-	WDR59	1	2	0	0	0	0	0	0	0	0	0	0	0	0	0	0	0	0	0	0	0	0	0	0	0	0	0	0	0	0	0	0	0	0	0	0	0	0	0	0	0	0	0	0.00800603	0
chr16	74948519	74956610	-	WDR59	1	2	0	0	0	0	0	0	0	0	0	0	0	0	0	0	0	0	0	0	0	0	0	0	0	0	0	0	0	0	0	0	0	0	0	0	0	0	0	0	0	0	0	0	0
chr16	7518389	7052057	+	RBFOX1	1	2	0	0	0	0	0	0	0	0	0	0	0	0.013703	0	0	0	0	0	0	0	0	0	0	0	0	0	0	0	0	0	0	0	0	0	0	0	0	0	0	0	0	0	0	0
chr16	7518389	7518147	+	RBFOX1	1	29	0	0	0	0	0	0	0	0.0226044	0	0	0	0	0	0	0	0	0	0	0	0	0	0	0	0	0	0	0	0.0297937	0	0.0104822	0.0102477	0	0	0	0	0.0174408	0	0	0	0	0	0.00800603	0.015239
chr10	68892773	68881958	+	STOX1	1	19	0	0	0	0	0	0	0	0	0	0	0	0.013703	0	0	0	0	0	0	0	0	0	0	0.0103481	0	0	0	0	0	0.0152018	0	0	0	0	0	0	0	0	0.00773231	0	0	0	0.00800603	0
chr16	75234889	75235986	-	BCAR1	1	1	0	0	0	0	0	0	0	0	0	0	0	0	0	0	0	0	0	0	0	0	0	0	0	0	0	0	0	0	0	0	0	0	0	0	0	0	0	0	0	0	0	0	0
chr16	75391380	75414695	-	CFDP1	1	35	0	0	0	0	0	0	0	0	0	0	0.0225478	0	0	0.0435666	0	0	0	0.0187576	0	0	0	0	0	0	0	0	0	0.0297937	0	0	0	0.0127873	0	0	0	0	0	0	0	0	0	0.0160121	0
chr16	75395090	75414695	-	CFDP1	1	7	0	0	0	0	0	0	0	0	0	0	0	0	0	0	0	0	0	0	0	0	0	0	0	0	0	0	0	0	0	0.0104822	0	0	0	0	0	0	0	0	0	0	0	0.00800603	0
chr16	75411825	75414695	-	CFDP1	1	3	0	0	0	0	0	0	0	0	0	0	0	0	0	0	0	0	0	0	0	0	0	0	0	0	0	0.0128174	0.00847806	0	0	0	0	0	0	0	0	0	0	0	0	0	0	0	0
chr16	75412535	75414695	-	CFDP1	1	2	0	0	0	0	0	0	0	0	0	0	0	0	0	0	0	0	0	0	0	0	0	0	0	0	0	0	0	0	0	0	0	0	0	0	0	0	0	0	0	0	0	0	0
chr16	75603085	75608988	-	ADAT1	1	1	0	0	0	0	0	0	0	0	0	0	0	0	0	0	0	0	0	0	0	0	0	0	0	0	0	0	0	0	0	0	0	0	0	0	0	0	0	0	0	0	0	0	0
chr16	75608224	75608988	-	ADAT1	1	3	0	0	0	0	0	0	0	0	0	0	0	0.013703	0	0	0	0	0	0	0	0	0.0105441	0	0	0	0	0	0	0	0	0	0	0	0	0	0	0	0	0	0	0	0	0	0
chr16	75640184	75641723	-	KARS	1	3	0	0	0	0	0	0	0	0	0	0	0	0	0	0	0	0	0	0	0	0	0.0105441	0	0	0	0	0	0	0	0	0	0.0102477	0	0	0	0	0	0.0196896	0	0	0	0	0	0
chr16	7595641	7579777	+	RBFOX1	1	1	0	0	0	0	0	0	0	0	0	0	0	0	0	0	0	0.053592	0	0	0	0	0	0	0	0	0	0	0	0	0	0	0	0	0	0	0	0	0	0	0	0	0	0	0
chr16	7597431	7579777	+	RBFOX1	1	6	0	0	0	0	0	0	0	0	0	0	0	0	0	0	0	0	0.0104998	0	0	0	0	0	0	0.01967	0	0	0	0	0	0	0	0	0	0	0	0	0	0	0	0	0	0	0
chr10	68943257	68936936	+	DDX50	1	23	0	0	0	0	0	0	0.0313477	0	0	0	0	0	0	0.0290444	0	0	0	0	0	0	0.0527206	0	0.0103481	0	0	0	0	0	0	0	0.0307431	0	0	0	0	0	0	0.0154646	0	0.022912	0.0383604	0	0.015239
chr16	7607338	7518147	+	RBFOX1	1	1	0	0	0	0	0	0	0	0	0	0	0	0	0	0	0	0	0	0	0	0	0	0	0	0	0	0	0	0	0	0	0	0	0	0	0	0	0	0	0	0	0	0	0
chr16	7607338	7579777	+	RBFOX1	1	111	0	0.018373	0.0934339	0.0733527	0.0502943	0.0538261	0.0313477	0.0678132	0	0.0486218	0.0225478	0.0274061	0.0195497	0.0435666	0.0143092	0	0	0.0562729	0.0415416	0.0177355	0.105441	0.0533777	0.0206962	0.11802	0	0.102539	0.0169561	0.0297937	0.0456055	0.0838574	0.0204954	0.102298	0.0601511	0.0197506	0.0846902	0.0174408	0.177206	0.00773231	0	0.05728	0.095901	0.104078	0.015239
chr16	7607338	7579780	+	RBFOX1	1	111	0	0.018373	0.0934339	0.0733527	0.0502943	0.0538261	0.0313477	0.0678132	0	0.0486218	0.0225478	0.0274061	0.0195497	0.0435666	0.0143092	0	0	0.0562729	0.0415416	0.0177355	0.105441	0.0533777	0.0206962	0.11802	0	0.102539	0.0169561	0.0297937	0.0456055	0.0838574	0.0204954	0.102298	0.0601511	0.0197506	0.0846902	0.0174408	0.177206	0.00773231	0	0.05728	0.095901	0.104078	0.015239
chr16	7607338	7587247	+	RBFOX1	1	4	0	0	0	0	0	0	0	0	0	0	0	0	0	0	0	0	0	0	0	0	0	0	0.0103481	0	0	0	0	0	0	0	0	0	0	0	0	0	0	0	0	0	0	0	0
chr16	7607338	7595549	+	RBFOX1	1	6	0	0	0	0	0	0	0.0208984	0	0	0	0	0	0	0	0	0.013398	0	0	0	0	0	0	0	0	0	0	0	0	0	0	0	0	0	0	0	0	0	0	0	0	0	0.00800603	0
chr16	7630683	7579777	+	RBFOX1	1	3	0	0	0	0	0	0	0	0	0.0215419	0	0	0	0	0	0	0	0	0	0	0	0	0	0	0	0.0143901	0	0	0	0	0	0	0	0	0	0	0	0	0	0.0131307	0	0	0	0
chr16	76449858	76448012	+	CNTNAP4	1	6	0.0132985	0	0	0	0	0	0.0104492	0	0	0	0	0	0	0	0	0	0	0	0	0	0	0	0	0	0	0	0	0	0	0	0	0	0	0.0197506	0	0	0	0	0	0	0	0	0
chr16	76452769	76448012	+	CNTNAP4	1	1	0	0	0	0	0	0	0	0	0	0	0	0	0	0	0	0	0	0	0	0	0	0	0	0	0	0	0	0	0	0	0	0	0	0	0	0	0	0	0	0	0	0	0
chr16	76462105	76448012	+	CNTNAP4	1	3	0	0	0	0	0	0	0	0	0	0	0	0	0	0	0	0	0	0	0	0	0	0	0	0	0.0143901	0	0	0	0	0	0	0	0	0	0	0	0	0	0	0	0	0	0
chr16	76467523	76448012	+	CNTNAP4	1	7	0	0	0	0	0	0.00897101	0	0.0113022	0	0	0	0	0	0	0	0	0	0	0	0	0.0105441	0	0	0	0	0	0.00847806	0	0	0	0	0	0	0	0	0	0	0	0	0	0	0	0
chr10	68960249	68959806	+	DDX21	1	34	0	0.018373	0.0311446	0	0	0	0.0104492	0	0.0215419	0	0	0	0	0.0145222	0	0	0	0.0187576	0.0207708	0.0177355	0.0105441	0	0	0.01967	0	0	0	0	0	0	0	0	0	0	0	0	0.0393792	0	0	0.011456	0	0.00800603	0
chr16	76495066	76452508	+	CNTNAP4	1	2	0	0	0	0	0	0	0	0	0	0	0	0	0	0	0	0	0	0	0	0	0	0	0	0	0	0	0	0	0	0.0104822	0	0	0	0	0	0	0	0	0	0	0	0	0
chr16	76498694	76475939	+	CNTNAP4	1	2	0	0	0	0	0	0	0	0	0	0	0	0	0	0	0	0	0	0	0	0	0	0	0	0	0	0	0	0	0	0	0	0	0	0	0	0	0	0	0	0	0	0.00800603	0
chr16	76522257	76498567	+	CNTNAP4	1	2	0	0	0	0	0	0	0	0	0	0	0	0	0	0	0	0	0	0	0	0	0	0	0	0	0.0143901	0	0	0.0148968	0	0	0	0	0	0	0	0	0	0	0	0	0	0	0
chr16	7653947	7579777	+	RBFOX1	1	11	0	0	0	0	0	0	0	0	0	0	0	0.013703	0	0	0	0.040194	0	0	0	0	0	0	0	0	0	0	0	0	0	0	0	0	0	0.0197506	0	0	0	0	0	0	0	0	0
chr16	7653947	7587247	+	RBFOX1	0		0	0	0	0	0	0	0	0	0	0	0	0	0	0	0	0	0	0	0	0	0	0	0	0	0	0	0	0	0	0	0	0	0	0	0	0	0	0	0	0	0	0	0
chr16	7653947	7595549	+	RBFOX1	1	2	0	0	0	0	0	0	0	0	0	0	0	0	0	0	0	0	0	0	0	0	0.0105441	0	0	0	0	0	0	0	0	0	0	0	0	0	0	0	0	0	0	0.005728	0	0	0
chr16	7653947	7597371	+	RBFOX1	1	6	0	0	0	0	0	0	0	0	0	0	0	0	0	0	0	0	0	0	0	0	0	0	0	0	0	0	0	0	0	0.0104822	0	0	0	0	0	0	0	0	0	0	0	0	0
chr16	76540790	76535545	+	CNTNAP4	1	1	0	0	0	0	0	0	0	0	0	0	0	0	0	0	0	0	0	0	0	0	0	0	0	0	0	0.0128174	0	0	0	0	0	0	0	0	0	0	0	0	0	0	0	0	0
chr16	7676838	7579777	+	RBFOX1	1	1	0	0	0	0	0	0	0	0	0	0	0	0	0	0.0145222	0	0	0	0	0	0	0	0	0	0	0	0	0	0	0	0	0	0	0	0	0	0	0	0	0	0	0	0	0
chr16	7676838	7587247	+	RBFOX1	1	6	0	0	0	0	0	0	0	0	0	0	0	0	0	0	0	0	0	0	0	0	0	0	0	0	0	0	0	0	0	0	0	0	0	0	0	0	0.0196896	0	0	0	0	0	0
chr10	68962157	68959806	+	DDX21	1	1	0	0	0.0155723	0	0	0	0	0	0	0	0	0	0	0	0	0	0	0	0	0	0	0	0	0	0	0	0	0	0	0	0	0	0	0	0	0	0	0	0	0	0	0	0
chr16	7676838	7595549	+	RBFOX1	1	2	0	0.018373	0	0	0	0	0	0	0	0	0	0	0	0	0	0	0	0	0	0	0	0	0	0	0	0	0	0	0	0	0	0	0	0	0	0	0	0	0	0	0	0	0
chr16	7693367	7587247	+	RBFOX1	1	1	0	0	0	0	0	0	0	0	0	0	0	0	0	0	0	0	0	0	0	0	0	0	0	0	0	0	0	0	0	0	0	0	0	0	0	0	0	0	0	0	0	0	0
chr16	7693367	7595549	+	RBFOX1	1	3	0	0	0	0	0	0	0	0	0.0215419	0	0	0	0	0	0	0	0	0	0	0	0	0	0	0	0	0	0	0	0	0	0	0	0	0	0	0	0	0	0	0	0	0	0
chr16	7693367	7653815	+	RBFOX1	1	2	0	0	0	0	0	0	0	0	0	0	0	0	0	0	0	0	0	0	0	0	0	0	0.0103481	0	0	0	0	0	0	0	0	0	0	0	0	0	0	0	0.0131307	0	0	0	0
chr16	7709131	7579777	+	RBFOX1	1	3	0	0	0	0	0	0	0	0	0	0	0	0	0	0	0	0	0	0	0	0	0	0	0	0	0	0	0	0	0	0	0	0	0	0	0	0	0	0	0	0	0	0	0
chr16	7709131	7587247	+	RBFOX1	1	1	0	0	0	0	0	0	0	0	0	0	0	0	0	0	0	0	0	0	0	0	0	0	0	0	0	0	0	0	0	0	0	0	0	0	0	0	0	0	0	0	0	0	0
chr16	77319849	77326038	-	ADAMTS18	1	1	0	0	0	0	0	0	0	0	0	0	0	0	0	0	0	0	0	0	0	0	0	0	0	0	0	0	0	0	0	0	0	0	0	0	0	0	0	0	0	0	0	0	0
chr16	77319849	77335904	-	ADAMTS18	1	1	0	0	0	0.0244509	0	0	0	0	0	0	0	0	0	0	0	0	0	0	0	0	0	0	0	0	0	0	0	0	0	0	0	0	0	0	0	0	0	0	0	0	0	0	0
chr16	77353733	77367723	-	ADAMTS18	1	3	0	0	0	0	0	0	0.0104492	0	0	0	0	0	0	0	0	0	0	0	0	0	0	0	0	0	0	0	0	0	0	0	0	0	0	0	0	0	0	0	0	0	0	0	0
chr16	77825461	77816921	+	VAT1L	1	9	0	0	0	0	0	0.00897101	0	0	0	0	0	0	0.0195497	0	0	0	0	0	0	0	0.0105441	0	0	0	0	0	0	0	0	0.0104822	0	0	0	0	0	0	0	0	0	0	0	0	0
chr10	68963469	68959806	+	DDX21	1	2	0	0	0	0	0	0	0	0	0	0	0	0	0	0	0	0	0	0	0	0	0	0	0	0	0	0	0	0	0	0	0	0	0	0	0	0.0174408	0	0	0	0	0	0	0
chr16	78164289	78108423	+	WWOX	1	2	0	0	0	0	0	0	0	0	0	0	0	0	0	0	0	0	0	0	0	0	0	0	0	0	0	0	0	0	0	0	0	0	0	0	0	0	0	0.00773231	0	0	0	0	0
chr16	80620763	80685129	-	CDYL2	1	1	0	0	0	0	0	0	0	0	0	0	0	0	0	0	0	0	0	0	0	0	0.0105441	0	0	0	0	0	0	0	0	0	0	0	0	0	0	0	0	0	0	0	0	0	0
chr16	80684538	80685129	-	CDYL2	1	133	0.0797912	0.0367461	0.0934339	0.244509	0.125736	0.0358841	0.0731446	0.0791155	0.172335	0.0486218	0.135287	0.109624	0.0781986	0.188789	0.0858555	0.026796	0.0734989	0.15944	0.145396	0.106413	0.189794	0.0177926	0.0827848	0.0590101	0.0863405	0.089722	0.135649	0.178762	0.0608073	0.136268	0.0819817	0.0383618	0.0300755	0.0987532	0.14115	0.122086	0.0787584	0.0386616	0.0393921	0.0801921	0.0767208	0.0960723	0.0914339
chr16	81365478	81351583	+	GAN	1	10	0	0.018373	0.0155723	0	0	0	0	0.0113022	0	0	0	0	0	0	0	0	0	0	0	0	0	0	0	0	0	0	0	0	0	0	0	0	0	0	0	0	0.0196896	0	0	0	0	0	0
chr16	81365478	81354405	+	GAN	1	26	0	0	0	0	0	0.026913	0	0	0	0	0	0.013703	0	0.0145222	0	0	0	0	0	0	0.0210882	0	0	0.01967	0	0.0128174	0.00847806	0	0	0	0	0	0	0	0	0	0	0	0.0131307	0	0	0	0
chr16	81365478	81356785	+	GAN	1	2	0	0	0	0	0	0	0	0	0	0	0	0	0	0	0	0	0	0	0	0	0	0	0	0	0	0	0	0	0	0	0	0	0	0	0	0	0	0	0	0	0	0.00800603	0
chr16	81365478	81362499	+	GAN	1	3	0	0	0	0	0	0	0	0	0	0	0	0	0	0	0	0	0	0	0	0	0	0	0	0	0	0	0	0	0	0	0	0	0	0	0	0	0	0	0	0	0	0	0
chr16	81664349	81652203	+	CMIP	1	1	0	0	0	0	0	0	0	0	0	0	0	0	0	0	0	0	0	0	0	0	0	0	0	0	0	0	0	0	0	0	0	0	0	0	0	0	0	0	0	0	0	0	0
chr1	6825210	6806983	+	CAMTA1	1	5	0	0	0	0	0	0	0	0	0	0	0	0	0	0	0	0	0	0	0	0	0.0105441	0	0	0	0	0	0	0	0	0	0	0	0	0	0	0	0	0	0	0	0	0	0
chr16	83032218	82858362	+	CDH13	1	1	0	0	0	0	0	0	0	0.0113022	0	0	0	0	0	0	0	0	0	0	0	0	0	0	0	0	0	0	0	0	0	0	0	0	0	0	0	0	0	0	0	0	0	0	0
chr10	68967203	68959806	+	DDX21	1	2	0	0	0	0	0	0	0	0	0	0	0	0	0	0	0	0	0	0	0	0	0.0210882	0	0	0	0	0	0	0	0	0	0	0	0	0	0	0	0	0	0	0	0	0	0
chr16	83032218	83023013	+	CDH13	1	2	0	0	0	0	0	0	0	0	0	0	0	0	0	0	0	0	0	0	0	0	0.0105441	0	0	0	0	0	0	0	0	0	0	0	0	0	0	0	0	0	0	0	0	0	0
chr16	83032218	83032010	+	CDH13	1	16	0	0	0	0	0	0	0	0	0	0	0	0.013703	0	0	0	0	0	0	0	0	0	0	0	0	0	0.0256349	0	0	0	0	0	0	0	0	0	0	0.0196896	0	0.0131307	0.005728	0	0	0
chr16	83217497	82858362	+	CDH13	1	1	0	0	0	0	0	0	0	0	0	0	0	0	0	0	0	0	0	0	0	0	0	0	0	0	0	0	0	0	0	0	0	0	0	0	0	0	0	0	0	0	0	0	0
chr16	83678461	83670790	+	CDH13	1	1	0	0	0	0	0	0	0	0	0	0	0	0	0	0	0	0	0	0	0	0	0	0	0	0	0	0	0	0	0	0	0.0102477	0	0	0	0	0	0	0	0	0	0	0	0
chr16	83912367	83906987	+	MLYCD	1	46	0	0.018373	0	0	0	0.026913	0	0.0113022	0.0215419	0.0162073	0	0	0.0195497	0.0145222	0.0143092	0	0.0104998	0.00937882	0	0	0.0210882	0.0177926	0	0.01967	0.0143901	0	0.0339122	0.0148968	0.0152018	0	0	0	0	0.0592519	0	0.0174408	0	0.00773231	0.0131307	0	0	0.0160121	0
chr16	84099053	84102107	-	MBTPS1	1	2	0	0	0	0	0	0	0	0	0	0	0	0	0	0	0	0	0	0	0	0	0	0	0	0	0	0	0	0	0	0	0	0	0	0	0	0	0	0	0	0	0	0	0
chr16	84150342	84149007	+	DNAAF1	1	3	0	0	0	0	0	0	0	0	0	0	0	0	0	0.0145222	0	0	0	0	0	0	0	0	0	0	0	0	0	0	0	0	0	0	0	0	0	0	0	0	0	0.005728	0	0	0
chr16	84170356	84169859	+	DNAAF1	1	1	0	0	0	0	0	0	0	0	0	0	0	0	0	0	0	0	0	0	0	0	0	0	0	0	0	0	0	0	0	0	0	0	0	0	0	0	0	0	0	0	0	0	0
chr16	84745673	84733053	+	USP10	1	1	0	0	0	0	0	0	0	0	0	0	0	0	0	0	0	0	0	0	0	0	0	0	0	0	0	0	0	0	0	0	0	0	0	0	0.0282301	0	0	0	0	0	0	0	0
chr16	84838735	84838422	+	CRISPLD2	1	1	0	0	0	0	0	0	0	0	0	0	0	0	0	0	0	0	0	0	0	0	0	0	0	0	0	0	0	0	0	0	0	0	0	0	0	0	0	0	0	0	0	0	0
chr10	68967203	68963291	+	DDX21	1	12	0	0	0	0	0	0.00897101	0	0	0	0	0	0	0	0.0145222	0	0	0	0	0	0	0	0	0	0	0	0	0	0	0	0	0	0	0	0	0	0	0.0196896	0	0	0.005728	0.0191802	0	0
chr16	85087166	85086644	+	KIAA0513	1	1	0	0	0	0	0	0	0	0	0	0	0	0	0	0	0	0	0	0	0	0	0	0	0	0	0	0	0	0	0	0	0	0	0	0	0	0	0	0	0	0	0	0	0.015239
chr16	85634132	85633914	+	GSE1	1	68	0.0265971	0.0367461	0	0.0244509	0	0.00897101	0	0.0113022	0	0.0162073	0.0225478	0	0.0195497	0	0	0	0	0	0.0207708	0	0.0316324	0	0.0103481	0.01967	0	0.0256349	0.00847806	0.0595873	0.0304037	0.0209643	0.0102477	0	0	0	0	0.0348817	0.0196896	0.0231969	0	0.011456	0	0.00800603	0
chr1	6871840	6820181	+	CAMTA1	1	1	0	0	0	0	0	0	0	0	0	0	0	0	0	0	0	0	0	0	0	0	0	0	0	0	0	0	0	0	0	0	0	0	0	0	0	0	0	0	0	0	0	0	0
chr16	87342877	87347250	-	FBXO31	1	6	0	0	0	0	0	0	0	0	0	0	0	0	0	0	0	0	0	0	0	0	0	0	0	0	0	0	0	0.0148968	0	0	0	0	0	0	0	0.0174408	0	0	0	0.005728	0	0	0
chr16	87342877	87360366	-	FBXO31	1	2	0	0	0	0	0	0	0	0	0	0	0	0	0	0	0	0.013398	0	0	0	0	0	0	0	0	0	0	0	0	0	0	0	0	0	0	0	0	0	0	0	0	0	0	0
chr16	87417460	87418901	-	ZCCHC14	1	6	0.0132985	0	0	0	0	0	0	0	0	0	0	0	0	0.0290444	0	0	0	0	0	0	0	0	0	0	0.0143901	0	0	0	0	0	0.0102477	0	0	0	0	0	0	0.00773231	0	0	0	0	0
chr16	87417460	87423881	-	ZCCHC14	1	1	0	0	0	0	0	0	0	0	0	0	0	0	0	0	0	0	0	0	0	0	0	0	0	0	0	0	0	0	0	0	0	0	0	0	0	0	0	0	0	0	0	0.00800603	0
chr16	87419783	87420716	-	ZCCHC14	1	6	0	0	0	0	0	0	0	0	0	0	0	0.0274061	0	0	0	0	0	0	0	0	0.0105441	0	0	0	0	0	0	0	0	0	0	0	0	0	0	0	0	0.00773231	0	0	0	0	0
chr16	87419783	87433201	-	ZCCHC14	1	1	0	0	0	0	0	0	0	0	0	0	0	0	0	0	0	0	0	0	0	0	0	0	0	0	0	0	0	0	0	0	0	0.0127873	0	0	0	0	0	0	0	0	0	0	0
chr16	8750539	8746001	+	ABAT	1	5	0	0	0	0	0	0	0	0	0	0	0	0	0	0	0	0.013398	0	0	0	0	0	0	0	0	0	0	0	0	0	0	0	0	0	0	0	0	0	0	0	0	0	0	0
chr10	68970350	68963291	+	DDX21	1	2	0	0	0	0	0	0	0	0	0	0	0	0	0	0	0	0	0	0	0	0	0	0	0	0	0	0	0	0	0	0	0	0	0	0	0	0	0	0	0	0	0	0	0
chr16	8757806	8746001	+	ABAT	1	56	0	0	0.0467169	0	0	0.00897101	0.0104492	0.0226044	0.0215419	0	0.0450957	0.013703	0	0	0.0143092	0	0.0104998	0.00937882	0.0207708	0	0.0105441	0	0.0413924	0	0	0.0384523	0.0932586	0.0148968	0.0152018	0.0104822	0	0	0	0.0197506	0	0.0174408	0.0787584	0	0.0131307	0.005728	0	0	0
chr16	8768973	8766208	+	ABAT	1	4	0	0	0	0	0	0	0	0.0113022	0	0	0	0	0	0	0	0	0	0	0	0	0	0	0	0	0	0	0	0	0	0	0	0	0	0	0	0	0	0	0	0	0	0	0
chr16	87726765	87730644	-	KLHDC4	1	1	0	0	0	0	0	0	0	0	0	0	0	0	0	0	0	0	0	0	0	0	0	0	0	0	0	0.0256349	0	0	0	0	0	0	0	0	0	0	0	0	0	0	0	0	0
chr16	87748673	87762040	-	KLHDC4	1	10	0	0	0	0	0	0	0	0	0	0	0	0	0	0	0	0	0	0	0	0	0	0	0	0	0	0	0.0169561	0	0	0	0	0	0	0	0	0	0	0	0	0	0	0	0
chr16	879570	881505	-	LMF1	1	5	0	0	0.0155723	0	0	0	0	0	0	0	0	0	0	0	0	0	0	0	0	0	0.0105441	0	0	0	0	0	0	0	0	0	0	0	0	0	0	0	0	0	0	0	0	0	0
chr16	879570	893072	-	LMF1	1	1	0	0	0	0	0	0	0	0	0	0	0	0	0	0	0	0	0	0	0	0	0	0	0	0.01967	0	0	0	0	0	0	0	0	0	0	0	0	0	0	0	0	0	0	0
chr16	879570	911079	-	LMF1	1	4	0	0	0	0	0	0	0	0	0	0	0	0	0	0	0	0	0	0	0	0	0	0	0	0	0	0	0	0	0	0	0	0	0	0	0	0	0	0	0	0	0	0	0
chr16	87984259	87975048	+	BANP	1	33	0	0	0	0	0	0.00897101	0	0.0113022	0	0	0.0225478	0	0	0.0145222	0	0	0.0104998	0	0.0415416	0	0.0210882	0	0	0.01967	0	0.0256349	0.0254342	0	0	0	0.0307431	0	0	0	0	0	0	0.00773231	0	0	0	0.0160121	0
chr16	88006265	87975048	+	BANP	1	4	0	0	0	0	0	0	0.0104492	0	0	0	0	0.013703	0	0	0	0	0	0	0	0	0	0	0	0	0	0	0	0	0	0	0	0	0	0	0	0	0	0	0	0	0	0	0
chr16	88006265	87981036	+	BANP	1	2	0	0	0	0	0	0	0	0	0	0	0	0	0	0	0	0	0	0	0	0	0	0	0	0	0	0	0	0	0	0	0	0	0	0	0	0	0	0	0	0	0	0	0
chr10	69187756	69185987	+	SUPV3L1	1	3	0	0	0	0	0	0	0	0	0	0	0	0	0	0.0435666	0	0	0	0	0	0	0	0	0	0	0	0	0	0	0	0	0	0	0	0	0	0	0	0	0	0	0	0	0
chr16	88038011	88027483	+	BANP	1	1	0	0	0	0	0	0	0	0	0	0	0	0	0	0	0.0143092	0	0	0	0	0	0	0	0	0	0	0	0	0	0	0	0	0	0	0	0	0	0	0	0	0	0	0	0
chr16	8806407	8801799	+	PMM2	1	1	0	0	0	0	0	0	0	0	0	0	0	0	0	0	0	0	0	0	0	0	0	0	0.0103481	0	0	0	0	0	0	0	0	0	0	0	0	0	0	0	0	0	0	0	0
chr16	88599948	88586600	+	ZC3H18	1	2	0	0	0	0	0	0	0	0	0	0	0	0	0	0	0	0	0	0	0	0.0177355	0	0	0	0	0	0	0	0	0	0	0	0	0	0	0	0	0	0	0	0	0	0	0
chr16	88611536	88586600	+	ZC3H18	1	30	0	0	0.0155723	0	0	0.026913	0	0	0	0	0.0225478	0	0	0.0145222	0	0.026796	0.0104998	0.00937882	0	0	0	0	0	0.01967	0.0143901	0.0128174	0	0	0	0	0.0102477	0	0	0	0	0	0	0.00773231	0	0.005728	0	0	0
chr16	88611536	88598178	+	ZC3H18	1	12	0	0	0	0.0489018	0	0.00897101	0	0	0	0	0	0	0	0	0	0	0	0	0.0207708	0	0	0	0	0	0	0	0	0	0	0	0	0	0	0	0	0	0.0196896	0	0	0	0	0	0
chr16	88611536	88599791	+	ZC3H18	1	1	0.0132985	0	0	0	0	0	0	0	0	0	0	0	0	0	0	0	0	0	0	0	0	0	0	0	0	0	0	0	0	0	0	0	0	0	0	0	0	0	0	0	0	0	0
chr16	88611536	88608934	+	ZC3H18	1	35	0	0	0.0155723	0	0	0	0	0.0226044	0.0215419	0	0	0.013703	0	0	0	0	0	0	0	0	0.0210882	0	0	0	0	0.0128174	0.0254342	0	0	0	0.0102477	0	0	0	0	0	0.0196896	0	0	0.022912	0.0191802	0.0160121	0
chr16	88611536	88611268	+	ZC3H18	1	6	0	0	0	0	0	0	0	0	0	0	0	0	0	0	0	0	0	0	0	0	0	0	0	0	0	0	0	0	0	0	0	0	0	0	0	0	0	0	0	0	0	0	0
chr16	88628854	88627622	+	ZC3H18	1	2	0	0	0	0	0	0	0	0	0	0	0	0	0	0	0	0	0	0	0	0	0	0	0	0	0	0	0	0	0	0	0	0	0	0	0	0	0	0.00773231	0	0	0	0	0
chr16	8899604	8902482	-	USP7	1	1	0	0	0	0	0	0	0	0	0	0	0	0	0	0	0	0	0	0	0	0	0	0	0	0	0	0	0	0	0	0	0	0	0	0	0	0	0	0	0	0.005728	0	0	0
chr10	105158994	105105397	+	SORCS3	1	1	0	0	0	0	0	0	0	0	0	0	0	0	0	0	0	0	0	0	0	0	0	0	0	0	0	0	0	0	0	0	0	0	0	0	0	0	0	0.00773231	0	0	0	0	0
chr10	69191766	69182520	+	SUPV3L1	1	1	0	0	0	0	0	0	0	0	0	0	0	0	0	0	0	0	0	0	0	0	0	0	0	0	0	0	0	0	0	0	0	0	0	0	0	0	0	0	0	0	0	0	0
chr16	8905187	8910827	-	USP7	1	1	0	0	0	0	0	0	0	0	0	0	0	0.013703	0	0	0	0	0	0	0	0	0	0	0	0	0	0	0	0	0	0	0	0	0	0	0	0	0	0	0	0	0	0	0
chr16	8908341	8917156	-	USP7	1	1	0	0	0	0	0	0	0	0	0	0	0	0	0	0	0	0	0	0	0	0.0177355	0	0	0	0	0	0	0	0	0	0	0	0	0	0	0	0	0	0	0	0	0	0	0
chr16	8915254	8917156	-	USP7	1	15	0	0	0.0155723	0	0	0	0	0	0.0215419	0	0	0	0	0	0	0.013398	0	0	0	0	0.0210882	0	0	0	0	0	0	0	0	0.0104822	0	0	0	0	0	0	0	0	0	0	0	0	0
chr16	8929369	8930397	-	USP7	1	2	0	0	0	0	0	0	0	0	0	0	0	0	0	0	0	0	0.0104998	0	0	0	0	0	0	0	0	0	0	0	0	0	0	0	0	0	0	0	0	0	0	0	0	0	0
chr16	893007	954666	-	LMF1	1	1	0	0	0	0	0	0	0	0	0	0	0	0	0	0	0	0	0	0	0	0	0	0	0	0	0	0	0	0	0	0	0	0	0	0	0	0	0	0	0	0	0	0	0
chr16	89305206	89305344	-	ANKRD11	1	1	0	0	0	0	0	0	0	0	0	0	0	0	0	0	0	0	0	0	0	0	0	0	0	0	0	0	0	0	0	0	0	0	0	0	0	0	0	0	0	0	0	0.00800603	0
chr16	89305206	89313589	-	ANKRD11	1	6	0	0	0	0	0	0	0.0104492	0	0	0	0	0	0	0	0	0	0	0	0	0	0	0	0	0	0	0	0	0	0	0	0	0	0	0	0	0	0	0	0	0.005728	0	0	0
chr16	89305206	89317075	-	ANKRD11	1	38	0	0.018373	0	0	0.0251472	0	0	0	0	0	0	0	0	0	0	0	0	0.00937882	0	0	0.0105441	0	0	0.01967	0	0.0128174	0.0254342	0.0148968	0	0	0	0.0255745	0	0.0197506	0	0.0174408	0	0.0154646	0.0131307	0.011456	0.0191802	0.0160121	0
chr16	89305206	89317078	-	ANKRD11	1	38	0	0.018373	0	0	0.0251472	0	0	0	0	0	0	0	0	0	0	0	0	0.00937882	0	0	0.0105441	0	0	0.01967	0	0.0128174	0.0254342	0.0148968	0	0	0	0.0255745	0	0.0197506	0	0.0174408	0	0.0154646	0.0131307	0.011456	0.0191802	0.0160121	0
chr16	89532636	89524006	+	SPG7	1	1	0	0	0	0	0	0	0	0	0	0	0	0	0	0	0	0	0	0	0	0	0	0	0	0	0	0	0	0	0	0	0	0	0	0	0	0	0	0	0	0	0	0	0
chr10	69191766	69185987	+	SUPV3L1	1	21	0	0	0	0	0	0	0.0104492	0	0	0	0	0	0	0.0145222	0	0	0.0104998	0	0	0.0177355	0.0105441	0	0	0	0	0	0.0169561	0.0148968	0	0	0	0	0	0	0	0	0	0	0	0	0	0	0.015239
chr16	89548113	89544648	+	SPG7	1	2	0	0	0.0155723	0	0	0	0	0	0	0	0	0	0	0	0	0	0.0104998	0	0	0	0	0	0	0	0	0	0	0	0	0	0	0	0	0	0	0	0	0	0	0	0	0	0
chr16	89554563	89552979	+	SPG7	1	1	0	0	0	0	0	0	0	0	0	0	0	0	0	0	0	0	0	0	0	0	0	0	0	0	0	0	0	0	0	0	0	0	0	0	0	0	0	0	0	0.005728	0	0	0
chr16	89734038	89727279	+	ZNF276	1	1	0	0	0	0	0	0	0	0	0	0	0	0	0	0	0	0	0	0	0	0	0	0	0	0	0	0	0	0	0	0	0	0	0	0	0	0	0	0	0	0	0	0.00800603	0
chr16	89737905	89733482	+	ZNF276	1	16	0	0	0.0155723	0	0	0.00897101	0	0	0	0	0	0	0	0	0	0	0	0	0	0	0	0	0	0	0	0.0128174	0	0	0	0	0	0	0	0	0	0	0.0393792	0	0	0	0	0	0
chr16	89885966	89883351	+	TCF25	1	3	0	0	0	0	0	0	0	0	0	0	0	0	0	0	0	0	0	0	0	0	0	0	0	0	0	0	0	0	0	0	0	0	0	0	0	0	0	0	0	0	0	0	0
chr16	89887717	89883351	+	TCF25	1	1	0	0	0	0	0	0	0	0	0	0	0	0	0	0	0	0	0	0	0	0	0	0	0	0	0	0	0	0	0	0	0	0	0	0	0	0	0.0196896	0	0	0	0	0	0
chr16	89900794	89892193	+	TCF25	1	11	0	0	0	0	0	0	0	0	0	0	0	0	0	0	0	0	0.0209997	0	0	0	0	0	0	0	0	0	0	0	0	0	0	0	0	0.0197506	0	0	0	0	0	0	0	0.0160121	0
chr16	89900794	89895038	+	TCF25	1	5	0	0	0	0	0	0	0.0104492	0	0	0	0	0	0	0	0	0	0	0	0	0	0	0	0	0	0	0	0	0	0	0.0104822	0	0	0	0	0	0	0	0	0	0	0	0	0
chr16	89900794	89895990	+	TCF25	1	2	0	0	0	0	0	0.00897101	0	0	0	0	0	0	0	0	0	0	0	0	0	0	0	0	0	0	0	0	0	0	0	0	0	0	0	0	0	0	0	0	0	0	0	0	0
chr16	89904205	89892193	+	TCF25	1	1	0	0	0	0	0	0	0	0	0	0	0	0	0	0	0	0	0	0	0	0	0	0	0	0	0	0	0	0	0	0	0	0	0	0	0	0	0	0	0	0.005728	0	0	0
chr10	69195265	69185987	+	SUPV3L1	1	13	0	0	0.0155723	0.0244509	0	0	0	0	0	0	0	0	0	0	0	0	0	0.00937882	0	0	0	0	0	0	0	0	0	0	0	0	0	0	0	0	0.0282301	0	0.0196896	0	0	0	0	0.0160121	0
chr16	90032924	90031176	+	GAS8	1	2	0	0	0	0	0	0	0	0	0	0	0	0	0	0	0	0	0	0	0	0	0	0	0	0	0	0	0	0	0	0	0	0	0	0	0	0.0174408	0	0	0	0	0	0	0
chr16	90032924	90031190	+	GAS8	1	3	0	0	0.0155723	0	0	0	0	0	0	0	0	0	0	0	0	0	0	0	0	0	0	0	0	0	0	0	0	0	0	0	0	0	0	0	0	0	0	0	0	0	0	0	0
chr16	910931	954666	-	LMF1	1	3	0	0	0	0	0	0	0.0104492	0	0	0	0	0	0.0195497	0	0	0	0	0	0	0	0	0	0	0	0	0	0	0	0	0	0	0	0	0	0	0	0	0	0	0.005728	0	0	0
chr16	933991	954666	-	LMF1	1	1	0	0	0	0	0	0	0	0	0	0	0	0	0	0	0	0	0	0	0	0	0.0105441	0	0	0	0	0	0	0	0	0	0	0	0	0	0	0	0	0	0	0	0	0	0
chr16	934190	954666	-	LMF1	1	6	0	0	0	0	0	0	0	0	0	0	0	0	0	0	0	0	0	0	0.0207708	0	0	0	0.0206962	0	0.0143901	0	0	0	0	0	0	0	0	0	0	0	0	0	0	0	0	0	0
chr16	954357	954666	-	LMF1	1	4	0	0	0	0	0	0	0	0	0	0	0	0	0	0	0	0	0	0	0	0	0	0	0	0	0	0	0	0	0	0	0	0	0	0	0	0	0	0.00773231	0	0	0	0	0
chr16	9768851	9769089	-	GRIN2A	1	1	0	0	0	0	0	0	0	0	0	0	0	0	0	0	0	0	0	0	0	0	0	0	0	0	0	0	0	0	0	0	0	0	0	0	0	0	0.0196896	0	0	0	0	0	0
chr1	69792160	69678381	+	LRRC7	1	9	0	0	0	0	0	0	0	0	0.0215419	0	0	0	0	0	0.0143092	0	0	0	0	0	0	0	0	0	0	0	0	0	0	0.0209643	0	0	0	0	0	0	0	0	0	0	0	0.0240181	0
chr1	69792160	69716142	+	LRRC7	1	3	0	0	0	0	0	0	0	0	0	0	0	0	0	0	0	0	0	0	0	0	0	0	0	0	0	0	0	0	0	0	0	0.0127873	0	0	0	0	0	0	0	0	0	0	0
chr1	69792160	69760191	+	LRRC7	1	7	0	0	0	0	0	0	0	0	0	0	0	0	0	0	0	0	0	0	0	0.0177355	0	0	0	0	0	0	0	0.0148968	0	0	0	0	0	0	0	0	0.0196896	0	0	0	0	0	0
chr10	69203043	69198372	+	SUPV3L1	1	24	0	0	0	0	0	0	0	0	0	0	0	0.013703	0.0195497	0	0	0	0	0	0	0	0	0	0	0	0	0	0	0.0148968	0	0.0104822	0	0	0	0	0	0	0	0	0	0.005728	0	0.00800603	0
chr16	9798277	9841104	-	GRIN2A	1	21	0	0	0	0	0	0	0	0	0.0215419	0	0	0	0	0	0	0	0.0209997	0.00937882	0	0	0	0	0	0	0	0	0	0	0	0	0	0	0	0	0	0	0.0196896	0	0.0131307	0.005728	0.0191802	0	0
chr16	9798277	9849961	-	GRIN2A	1	8	0	0	0	0	0	0	0	0	0	0	0	0	0	0.0145222	0	0	0	0	0	0	0.0105441	0	0	0	0	0	0	0	0	0	0	0	0	0	0	0	0	0	0	0	0	0	0
chr16	98145	100509	-	NPRL3	1	17	0	0	0	0	0	0	0	0.0113022	0	0	0	0	0	0	0	0	0.0209997	0	0	0.0177355	0	0	0	0.01967	0.0287802	0	0	0	0	0	0	0	0	0	0	0	0.0196896	0	0	0.011456	0	0	0
chr16	9822264	9841104	-	GRIN2A	1	9	0	0	0	0	0	0	0	0	0	0	0	0	0	0	0	0	0	0	0	0	0.0316324	0	0	0	0	0	0	0	0	0	0	0.0383618	0	0	0	0	0	0	0.0262614	0	0	0	0
chr16	9822264	9849961	-	GRIN2A	1	12	0	0	0	0	0	0	0	0	0	0	0	0	0	0	0	0	0	0	0	0	0	0	0	0	0	0	0	0	0	0	0	0	0	0	0	0	0	0	0	0.005728	0	0.00800603	0
chr1	69825826	69678381	+	LRRC7	1	2	0	0	0	0	0	0	0	0	0	0	0	0	0	0	0	0	0	0	0	0	0	0	0	0	0	0	0	0.0148968	0	0	0	0	0	0	0	0	0	0	0	0	0	0	0
chr1	69825826	69760191	+	LRRC7	1	1	0	0	0	0	0	0	0	0	0	0	0	0	0	0	0	0	0	0	0	0	0	0	0	0	0	0	0	0	0	0	0	0	0	0	0	0	0	0	0	0	0	0	0
chr1	69838283	69678381	+	LRRC7	1	9	0	0	0	0	0	0.00897101	0	0	0.0215419	0	0	0	0	0	0	0	0	0	0	0	0	0	0	0	0	0	0	0	0	0	0	0	0	0	0	0	0	0	0	0	0	0	0
chr1	69838283	69760191	+	LRRC7	1	10	0	0	0	0	0	0	0	0	0	0	0	0	0	0	0	0	0	0	0	0	0.0210882	0	0	0	0	0	0	0	0	0	0	0	0	0	0	0	0	0	0	0	0	0	0
chr1	69838283	69792043	+	LRRC7	1	2	0	0	0	0	0	0	0	0	0	0	0	0	0	0	0	0	0	0	0	0	0	0	0	0	0	0	0	0	0	0	0	0	0	0	0	0.0174408	0	0	0	0	0	0	0
chr10	69380095	69376934	+	HK1	1	6	0	0	0	0	0	0	0	0	0	0	0	0	0	0	0	0	0	0	0	0	0	0	0.0103481	0	0.0143901	0	0	0	0	0	0	0	0	0	0	0	0	0	0	0	0	0	0
chr1	69838283	69825748	+	LRRC7	1	4	0	0	0	0	0	0	0	0	0	0	0	0	0	0	0	0	0	0	0	0	0	0	0	0	0	0	0	0.0148968	0	0	0	0	0	0	0	0	0	0	0	0	0	0	0
chr1	69838283	69834780	+	LRRC7	1	2	0	0	0	0	0	0	0	0	0	0	0	0	0	0	0	0	0	0	0	0	0	0	0	0	0	0	0	0	0	0.0104822	0	0	0	0	0	0	0	0	0	0	0	0	0
chr16	9849756	9891100	-	GRIN2A	1	1	0	0	0	0	0	0	0	0	0	0	0	0	0	0	0	0	0	0	0	0	0	0	0	0	0	0	0	0	0	0	0	0	0	0	0	0	0	0	0	0.005728	0	0	0
chr1	69931570	69760191	+	LRRC7	1	2	0	0	0.0155723	0	0	0	0	0	0	0	0	0	0	0	0	0	0	0	0	0	0	0	0	0	0	0	0	0	0	0	0	0	0	0	0	0	0	0	0	0	0	0	0
chr1	69931570	69825748	+	LRRC7	1	1	0	0	0	0	0	0	0	0	0	0	0	0	0	0	0	0	0	0	0	0	0	0	0	0	0	0	0	0	0	0	0	0	0	0	0	0	0	0	0	0	0	0	0
chr1	69994633	69931507	+	LRRC7	1	20	0	0	0	0	0	0	0	0	0.0646258	0	0.0450957	0	0.0390993	0.0145222	0	0	0	0.00937882	0	0	0.0105441	0	0	0	0.0287802	0.0128174	0	0.0297937	0	0.0104822	0	0	0	0	0	0	0	0.0154646	0	0	0	0	0
chr1	69994633	69980379	+	LRRC7	1	6	0	0	0	0	0	0	0	0	0	0	0	0	0	0	0	0	0	0	0	0	0	0	0.0103481	0	0	0	0	0	0	0	0	0	0	0	0	0	0	0	0	0	0	0	0
chr1	70013089	69994561	+	LRRC7	1	1	0	0	0	0	0	0	0	0	0	0	0	0	0	0	0	0	0	0	0	0	0	0	0	0	0	0	0	0	0	0	0	0	0	0	0	0	0	0	0	0	0	0	0
chr1	70076298	70053026	+	LRRC7	1	7	0	0	0	0	0	0	0	0	0	0	0	0	0	0	0	0	0	0	0	0.0354709	0	0	0	0	0	0	0	0	0	0	0	0	0	0	0	0	0	0	0	0	0	0	0
chr1	70089819	70053026	+	LRRC7	1	93	0.0132985	0	0.0778615	0	0.0754415	0.00897101	0.0104492	0.0113022	0.129252	0	0.0225478	0.0411091	0.0195497	0.0145222	0	0.013398	0	0	0.0207708	0	0.084353	0	0.0206962	0	0.0287802	0.0256349	0.00847806	0.0595873	0.0152018	0.0209643	0.0204954	0.0255745	0.0601511	0.0395013	0	0.0174408	0	0.0154646	0	0.017184	0	0.0160121	0
chr10	69485215	69483691	+	TSPAN15	1	3	0	0	0	0	0	0	0	0	0	0	0	0	0	0	0	0	0	0	0	0	0	0	0	0	0	0	0.00847806	0	0	0	0	0	0	0	0	0	0	0	0	0	0	0.00800603	0
chr1	70107826	70043954	+	LRRC7	1	2	0	0	0	0	0	0	0	0	0	0	0.0225478	0	0	0	0	0	0	0	0	0	0	0	0	0	0	0	0	0	0	0	0	0	0	0	0	0	0	0	0	0	0	0	0
chr1	70107826	70053026	+	LRRC7	1	67	0.0132985	0.0367461	0.0934339	0	0	0	0.0313477	0	0	0	0	0.0411091	0.0195497	0	0.0286185	0.026796	0.0209997	0.0281364	0	0	0	0.0177926	0	0	0	0	0	0.0148968	0.0304037	0.0419287	0	0.0383618	0	0	0	0.0348817	0.0393792	0	0.0262614	0	0.0383604	0	0.015239
chr1	70107826	70076077	+	LRRC7	1	41	0	0	0	0	0	0.00897101	0	0.0113022	0.0215419	0	0	0.0274061	0	0.0290444	0	0.026796	0	0.00937882	0.0207708	0	0.0210882	0	0	0.01967	0.0143901	0.0384523	0.00847806	0	0.0152018	0.0104822	0.0204954	0	0	0.0197506	0	0.0174408	0	0	0	0	0	0	0
chr1	70121870	70053026	+	LRRC7	1	22	0	0	0	0	0.0251472	0	0	0	0	0	0	0	0	0	0	0	0	0	0	0	0	0	0	0	0	0.0128174	0	0	0	0.0209643	0.0102477	0	0.0902266	0	0	0	0	0	0	0	0	0.00800603	0
chr1	70121870	70076077	+	LRRC7	1	24	0	0	0.0155723	0	0	0	0	0	0	0	0.0450957	0	0	0	0	0	0	0	0	0	0	0	0	0	0	0.0128174	0	0.0148968	0	0	0	0	0	0	0	0	0.0196896	0.0154646	0	0.011456	0	0	0
chr1	70151128	70175982	-	LRRC40	1	1	0	0	0	0	0	0	0	0	0	0	0	0	0	0	0	0	0	0	0	0	0	0	0	0	0	0	0	0	0	0	0	0	0	0	0	0	0	0	0	0	0	0	0
chr1	70173465	70189273	-	LRRC40	1	8	0	0	0.0155723	0	0	0	0	0	0	0	0	0	0	0	0	0	0	0	0	0	0.0105441	0	0.0103481	0	0	0	0	0	0	0	0	0	0	0	0	0	0	0	0	0	0	0.00800603	0
chr1	70181086	70189273	-	LRRC40	1	3	0	0	0	0	0	0	0	0	0	0	0	0	0	0	0	0	0	0	0	0	0	0	0	0	0	0	0	0	0	0	0	0	0	0	0	0.0174408	0	0	0	0	0	0	0
chr1	70184785	70189273	-	LRRC40	1	2	0	0	0	0	0	0	0	0	0	0	0	0	0	0	0	0	0	0	0	0	0	0	0	0	0	0	0	0	0	0	0	0	0	0	0	0	0	0	0	0	0	0	0
chr1	70270856	70276844	-	ANKRD13C	1	19	0	0	0	0	0	0	0	0	0	0	0	0	0	0	0	0	0.0209997	0	0	0	0.0105441	0	0.0103481	0	0.0143901	0	0	0	0	0	0	0	0	0	0	0	0	0	0.0131307	0.005728	0	0.00800603	0
chr10	69495689	69483691	+	TSPAN15	1	3	0	0	0	0	0	0	0	0	0	0	0	0	0	0	0	0	0	0	0	0	0	0	0	0	0	0	0	0	0	0	0	0	0	0	0	0	0	0	0	0	0	0	0
chr1	70270856	70300908	-	ANKRD13C	1	7	0	0	0	0	0	0.00897101	0	0	0	0	0	0	0	0	0	0	0	0	0	0	0	0	0	0.01967	0	0	0	0	0	0	0	0	0	0	0	0	0	0	0	0	0	0	0
chr1	70270856	70306290	-	ANKRD13C	1	3	0	0	0	0	0	0	0	0	0	0	0	0	0	0	0	0	0	0	0	0	0	0	0	0	0	0	0	0	0	0	0.0102477	0	0	0	0	0	0	0	0	0	0	0	0
chr1	70270856	70315566	-	ANKRD13C	1	76	0.0265971	0	0.0311446	0.0244509	0	0	0	0.0113022	0	0.0486218	0.0225478	0	0.0390993	0	0.0143092	0.053592	0	0.0187576	0	0	0	0	0.0206962	0.0393401	0	0.0384523	0.0169561	0.0148968	0.0304037	0.0209643	0	0.0255745	0.0300755	0	0	0	0.0393792	0	0.0262614	0.011456	0	0	0.015239
chr1	70270856	70324957	-	ANKRD13C	1	2	0	0	0	0	0	0	0	0	0	0	0	0	0	0	0	0	0.0104998	0	0	0	0	0	0	0	0	0	0	0	0.0152018	0	0	0	0	0	0	0	0	0	0	0	0	0	0
chr1	70274720	70296261	-	ANKRD13C	1	1	0	0	0	0	0	0	0	0	0	0	0	0	0	0	0	0	0	0	0	0	0	0	0	0	0	0	0	0	0	0	0	0	0	0	0	0	0	0	0	0	0	0	0
chr1	70274720	70300908	-	ANKRD13C	1	5	0	0	0	0	0	0	0	0	0	0	0	0	0	0	0	0	0	0	0	0	0	0	0	0	0	0	0.00847806	0	0	0.0104822	0	0	0	0	0	0	0	0	0	0	0	0	0
chr1	70274720	70306290	-	ANKRD13C	1	7	0	0	0	0	0	0	0	0	0	0	0	0	0	0	0	0	0	0	0	0	0.0105441	0	0	0	0	0	0	0	0	0	0	0	0	0	0	0	0	0	0	0	0	0	0
chr1	70274720	70315566	-	ANKRD13C	1	24	0	0	0	0	0	0.00897101	0	0	0	0	0	0.013703	0	0	0.0143092	0.013398	0.0104998	0.00937882	0	0.0177355	0	0	0	0	0	0.0128174	0	0	0	0	0	0	0	0	0	0	0	0	0	0	0	0.00800603	0
chr1	70274720	70324957	-	ANKRD13C	1	3	0	0	0	0	0	0	0	0	0	0	0	0	0	0.0145222	0	0	0	0	0	0	0	0	0	0	0	0	0	0	0	0	0	0	0	0	0	0	0	0	0	0	0	0	0
chr1	70274720	70336099	-	ANKRD13C	1	1	0	0	0	0	0	0	0	0	0	0	0	0	0	0	0	0	0	0	0	0	0	0	0	0	0	0	0	0	0	0	0	0	0	0	0	0	0	0	0	0	0	0	0
chr10	69498396	69483691	+	TSPAN15	1	15	0	0	0	0	0	0	0	0	0	0	0	0	0	0	0	0	0	0	0.0207708	0	0.0105441	0	0	0.01967	0	0	0	0	0	0	0	0	0	0	0	0	0	0	0	0.005728	0	0	0
chr1	70276765	70300908	-	ANKRD13C	1	2	0	0	0	0	0	0	0	0	0	0	0	0	0	0	0	0	0.0104998	0	0	0	0	0	0	0	0	0	0	0	0	0	0	0	0	0	0	0	0	0	0	0	0	0	0
chr1	70292388	70300908	-	ANKRD13C	1	4	0	0	0	0	0	0	0	0	0	0.0162073	0	0	0	0	0	0	0	0	0	0	0.0105441	0	0	0	0	0	0	0	0	0	0	0	0	0	0	0	0	0	0	0.011456	0	0	0
chr1	70292388	70306290	-	ANKRD13C	1	15	0	0	0	0	0	0	0.0104492	0.0113022	0	0	0	0.013703	0	0.0290444	0.0143092	0	0	0	0	0	0.0105441	0	0	0	0	0	0	0	0	0	0	0	0	0	0	0	0	0	0	0	0	0	0
chr1	70292388	70313790	-	ANKRD13C	1	14	0	0	0	0	0	0.00897101	0	0	0	0	0	0	0	0	0	0	0.0104998	0	0	0	0	0	0	0	0	0	0.00847806	0	0.0152018	0	0	0	0	0	0	0	0	0	0	0	0	0	0
chr1	70292388	70315566	-	ANKRD13C	1	64	0	0	0.0311446	0	0.0251472	0	0	0	0.0430839	0	0.0225478	0.013703	0	0	0.0286185	0.026796	0	0	0	0	0.0316324	0	0.0310443	0	0.0287802	0.0640871	0	0.0297937	0	0.0209643	0.0204954	0.0255745	0	0.0197506	0	0.0174408	0	0.00773231	0	0.005728	0.0191802	0.0320241	0
chr1	70292388	70324957	-	ANKRD13C	1	4	0	0	0	0	0	0	0	0	0	0	0	0	0.0195497	0	0.0286185	0	0	0	0	0	0	0	0	0	0	0	0	0	0	0	0	0	0	0	0	0	0	0	0	0	0	0	0
chr1	70292388	70336099	-	ANKRD13C	1	3	0	0	0	0	0	0	0	0	0	0	0	0	0	0	0	0	0	0	0	0	0	0	0	0	0	0	0	0	0	0	0	0	0	0	0	0	0.0196896	0	0	0	0	0	0
chr1	70296130	70313790	-	ANKRD13C	1	3	0	0	0	0	0	0	0	0	0	0	0	0	0	0	0	0	0	0	0	0	0	0	0	0	0	0	0	0	0	0	0	0	0	0	0	0	0	0	0	0	0	0	0
chr1	70296130	70315566	-	ANKRD13C	1	22	0.0132985	0	0	0.0244509	0	0	0	0	0	0	0	0	0	0.0290444	0	0	0.0104998	0	0	0	0	0	0	0	0	0	0	0	0	0.0104822	0	0	0	0	0	0	0	0	0.0131307	0	0	0	0
chr1	70296130	70324957	-	ANKRD13C	1	4	0.0132985	0	0	0	0	0	0	0	0	0	0	0	0	0	0	0	0	0	0	0.0177355	0	0	0	0	0	0	0	0	0	0	0	0	0	0	0	0	0	0	0	0	0	0	0
chr10	69504485	69483691	+	TSPAN15	1	1	0	0	0.0155723	0	0	0	0	0	0	0	0	0	0	0	0	0	0	0	0	0	0	0	0	0	0	0	0	0	0	0	0	0	0	0	0	0	0	0	0	0	0	0	0
chr1	70300764	70315566	-	ANKRD13C	1	48	0	0	0.0311446	0	0	0	0.0208984	0	0.0215419	0.0162073	0	0	0	0	0.0143092	0	0	0.00937882	0	0	0.0210882	0	0.0206962	0	0.0143901	0	0	0	0.0152018	0.0209643	0.0102477	0.0127873	0	0	0	0	0	0.00773231	0.0131307	0	0	0	0
chr1	70300764	70324957	-	ANKRD13C	1	1	0	0	0	0	0	0	0	0	0	0	0	0	0	0	0	0	0	0	0	0	0	0	0	0	0	0	0	0	0	0	0	0	0	0	0	0	0	0	0	0	0	0.00800603	0
chr1	70313745	70336099	-	ANKRD13C	1	1	0	0	0	0	0	0	0	0	0	0	0	0	0	0	0	0	0	0	0	0	0	0	0	0	0	0	0	0	0	0	0	0	0	0	0	0	0	0	0	0	0	0	0
chr1	70424416	70417937	+	CTH	1	1	0	0	0	0	0	0	0.0104492	0	0	0	0	0	0	0	0	0	0	0	0	0	0	0	0	0	0	0	0	0	0	0	0	0	0	0	0	0	0	0	0	0	0	0	0
chr17	1050050	1067242	-	ABR	1	1	0	0	0	0	0	0	0	0	0	0	0	0	0	0	0	0	0	0	0	0	0	0	0	0	0	0	0	0	0	0.0104822	0	0	0	0	0	0	0	0	0	0	0	0	0
chr17	1050050	1073677	-	ABR	1	5	0	0	0	0	0	0	0	0	0	0	0	0	0	0	0	0	0	0	0	0.0177355	0	0	0	0	0	0	0	0	0	0	0	0	0	0	0	0	0	0	0	0	0	0	0
chr17	1050050	1100735	-	ABR	1	7	0	0	0	0	0	0	0	0	0	0	0	0	0	0	0	0	0	0	0	0	0	0	0	0	0	0	0.0254342	0	0	0	0	0	0	0	0	0	0	0	0.0131307	0	0	0	0
chr17	1073625	1100735	-	ABR	1	1	0	0	0	0	0	0	0	0	0	0	0	0	0	0	0	0	0	0	0	0	0	0	0	0	0	0	0	0	0	0	0	0	0	0	0	0	0	0	0	0	0	0	0
chr17	1079330	1091850	-	ABR	1	1	0	0	0	0	0	0	0	0	0	0	0	0	0	0	0	0	0	0	0	0	0	0	0	0	0	0.0128174	0	0	0	0	0	0	0	0	0	0	0	0	0	0	0	0	0
chr17	1079330	1100735	-	ABR	1	1	0	0	0	0	0	0	0	0	0	0	0	0.013703	0	0	0	0	0	0	0	0	0	0	0	0	0	0	0	0	0	0	0	0	0	0	0	0	0	0	0	0	0	0	0
chr10	70091954	70090060	+	H2AFY2	1	2	0	0	0	0	0	0	0	0	0	0	0	0	0	0	0	0	0	0	0	0	0	0	0	0	0	0	0	0	0	0	0	0	0	0	0	0	0	0	0	0	0	0	0
chr17	1083520	1100735	-	ABR	1	21	0	0	0	0	0	0	0	0	0	0	0	0	0	0	0	0	0.0104998	0	0.0207708	0	0	0	0	0	0.0143901	0	0.00847806	0.0148968	0	0	0	0	0	0	0	0.0174408	0	0	0	0.005728	0	0.00800603	0
chr17	1091665	1091850	-	ABR	1	1	0	0.018373	0	0	0	0	0	0	0	0	0	0	0	0	0	0	0	0	0	0	0	0	0	0	0	0	0	0	0	0	0	0	0	0	0	0	0	0	0	0	0	0	0
chr17	1091665	1100735	-	ABR	1	3	0	0	0	0	0	0	0	0	0	0	0	0	0	0	0	0	0	0	0	0	0	0	0	0	0	0	0	0	0	0	0	0	0	0	0	0	0	0	0	0	0	0	0
chr17	1091665	1125367	-	ABR	1	1	0	0	0	0	0	0	0	0	0	0	0	0	0	0	0	0	0.0104998	0	0	0	0	0	0	0	0	0	0	0	0	0	0	0	0	0	0	0	0	0	0	0	0	0	0
chr17	11669794	11669064	+	DNAH9	1	1	0	0	0	0	0	0	0	0	0	0	0	0	0	0	0	0	0	0	0	0	0	0	0.0103481	0	0	0	0	0	0	0	0	0	0	0	0	0	0	0	0	0	0	0	0
chr17	11680889	11651069	+	DNAH9	1	1	0	0	0	0	0	0	0	0	0	0	0	0	0	0	0	0	0	0	0	0	0	0	0	0	0	0	0	0	0	0	0	0	0	0	0	0	0	0	0	0	0	0.00800603	0
chr17	12081530	12054889	+	MAP2K4	1	1	0	0	0	0	0	0	0	0	0	0	0	0	0	0	0	0	0	0	0	0	0	0	0	0	0	0	0	0	0	0	0	0	0	0	0	0	0	0	0	0	0	0	0
chr17	12095694	12054889	+	MAP2K4	1	14	0	0	0	0	0	0	0	0	0	0	0	0	0	0	0	0	0.0104998	0	0	0	0.0421765	0	0	0	0	0	0.0169561	0	0	0	0	0	0	0	0	0	0	0	0	0	0.0191802	0	0
chr17	12095694	12081356	+	MAP2K4	1	2	0	0	0	0	0	0	0	0	0	0.0162073	0	0	0	0	0	0	0	0	0	0	0	0	0	0	0	0	0	0	0	0	0	0	0	0	0	0	0	0	0	0	0	0	0
chr17	12113360	12054889	+	MAP2K4	1	34	0	0	0.342591	0	0	0	0	0	0.495464	0	0	0.109624	0.0977483	0.3921	0	0	0.146998	0.140682	0.103854	0	0	0	0	0.13769	0.129511	0	0	0.253246	0	0	0.163963	0	0	0	0	0	0	0	0	0	0	0	0.0609559
chr10	105201253	105167258	+	SORCS3	1	11	0	0	0	0	0	0	0	0	0	0	0	0	0	0	0	0	0	0	0	0	0	0	0	0	0	0	0	0	0	0	0	0	0	0	0	0.0174408	0	0	0	0.005728	0	0	0
chr10	70095753	70090060	+	H2AFY2	1	7	0	0	0	0	0	0	0	0	0	0	0	0	0	0	0	0	0	0	0	0	0	0	0	0	0	0	0	0.0148968	0	0	0	0	0	0	0	0	0	0	0	0	0	0	0
chr17	12113360	12081356	+	MAP2K4	1	42	0	0.018373	0	0	0	0	0	0.0226044	0	0.0324146	0	0	0	0	0	0	0	0	0	0	0.0210882	0	0.0206962	0	0	0.0512697	0.0169561	0	0.0152018	0.0104822	0	0	0	0.0197506	0	0	0.0196896	0.0231969	0.0262614	0.022912	0	0	0
chr17	12113360	12095575	+	MAP2K4	1	1	0	0	0	0	0	0	0	0	0	0	0	0	0	0	0	0	0	0	0	0	0	0	0	0	0	0	0	0	0	0	0	0	0	0	0	0	0	0	0	0	0	0	0
chr17	12129287	12054889	+	MAP2K4	1	11	0	0	0	0	0	0	0	0	0	0	0	0	0	0	0	0	0	0	0.145396	0	0.115985	0	0	0	0	0	0	0	0.0152018	0.062893	0	0.0895108	0	0	0	0	0	0	0	0	0	0	0
chr17	12129287	12081356	+	MAP2K4	1	3	0	0	0	0	0	0	0	0	0	0	0	0	0	0	0	0	0	0	0	0	0	0	0	0	0	0	0	0	0	0	0	0	0	0	0	0	0	0	0.0131307	0	0	0	0
chr17	12919831	12894940	+	ARHGAP44	1	24	0	0	0.0155723	0	0	0.017942	0.0208984	0	0	0	0.0225478	0	0	0.0145222	0	0	0	0	0	0	0.0105441	0	0	0	0	0	0.00847806	0	0	0	0.0102477	0	0	0	0	0	0.0393792	0	0	0	0	0	0
chr17	12919831	12896407	+	ARHGAP44	1	3	0	0	0	0	0	0	0	0	0	0	0	0	0	0	0	0	0	0	0	0	0	0	0	0	0	0	0	0	0	0	0	0	0	0	0	0	0	0	0	0	0.0191802	0	0
chr17	12919831	12908897	+	ARHGAP44	1	18	0	0.018373	0	0	0	0	0	0	0	0	0	0	0	0	0	0	0.0209997	0	0	0	0.0316324	0.0177926	0.0206962	0	0	0	0	0	0	0	0	0.0255745	0	0	0	0	0	0	0	0	0	0.00800603	0
chr17	12929046	12894940	+	ARHGAP44	1	16	0	0	0	0	0	0	0	0	0.0430839	0	0	0	0	0.0145222	0	0	0	0	0	0	0	0	0.0103481	0	0	0	0	0	0.0152018	0	0	0	0	0	0	0	0	0	0	0.005728	0	0	0.015239
chr17	12929046	12896407	+	ARHGAP44	1	5	0	0	0	0	0	0	0	0	0	0	0	0	0	0	0	0	0	0	0	0	0	0	0	0	0	0	0	0	0	0	0	0	0	0	0	0	0	0	0.0131307	0	0	0	0
chr17	12929046	12908897	+	ARHGAP44	1	62	0	0.018373	0	0	0	0	0	0.0113022	0.0215419	0	0	0.013703	0.0195497	0.0435666	0.0143092	0.013398	0	0.0187576	0	0.0532064	0	0	0.0206962	0	0.0143901	0	0.00847806	0.0297937	0	0	0.0204954	0	0	0.0197506	0	0.0523225	0.0590688	0	0	0.02864	0	0.0480362	0
chr10	70114145	70124097	-	AIFM2	1	2	0	0	0	0	0	0	0	0	0	0	0	0	0	0	0	0	0	0	0	0	0	0	0	0	0	0	0	0	0	0	0	0	0	0	0	0.0174408	0	0	0	0	0	0	0
chr17	12929046	12915900	+	ARHGAP44	1	5	0	0	0	0	0	0	0	0	0	0	0	0	0	0	0	0	0	0.00937882	0	0	0	0	0	0	0	0	0	0	0	0	0	0	0	0	0	0	0	0.00773231	0	0	0	0	0
chr17	12944196	12941056	+	ARHGAP44	1	5	0	0	0	0	0	0	0	0	0	0	0	0	0	0.0145222	0	0	0	0	0	0	0	0	0	0	0	0	0	0	0	0	0	0	0	0	0	0	0	0	0	0	0	0	0
chr17	12944196	12943588	+	ARHGAP44	1	2	0	0	0	0	0	0	0	0	0	0.0162073	0	0	0	0	0	0	0	0	0	0	0.0105441	0	0	0	0	0	0	0	0	0	0	0	0	0	0	0	0	0	0	0	0	0	0
chr17	12952581	12941056	+	ARHGAP44	1	1	0	0	0.0155723	0	0	0	0	0	0	0	0	0	0	0	0	0	0	0	0	0	0	0	0	0	0	0	0	0	0	0	0	0	0	0	0	0	0	0	0	0	0	0	0
chr17	12958897	12941056	+	ARHGAP44	1	2	0	0	0	0	0	0	0	0	0	0	0	0	0	0	0	0	0	0	0	0	0	0	0	0	0	0	0	0	0	0	0	0	0	0	0	0	0	0	0	0	0	0.00800603	0
chr17	1361092	1362008	-	YWHAE	1	1	0	0	0	0	0	0	0	0	0	0	0	0	0	0	0	0	0	0	0	0	0	0	0	0	0	0	0	0	0	0	0	0	0	0	0	0	0	0	0	0	0	0	0
chr17	14077056	14074323	+	COX10	1	3	0	0	0	0	0	0	0	0	0	0	0	0	0	0	0	0	0	0	0	0	0	0	0	0	0	0	0	0	0	0	0	0	0	0	0	0	0	0	0	0.005728	0	0.00800603	0
chr17	1480527	1480885	-	MYO1C	1	1	0	0	0	0	0	0	0	0	0	0	0	0	0	0	0	0	0	0	0	0.0177355	0	0	0	0	0	0	0	0	0	0	0	0	0	0	0	0	0	0	0	0	0	0	0
chr17	1521579	1558559	-	PITPNA	1	1	0	0	0	0	0	0	0	0	0	0	0	0	0	0	0	0	0	0	0	0	0	0	0	0	0	0	0	0	0	0.0104822	0	0	0	0	0	0	0	0	0	0	0	0	0
chr17	15327992	15331614	-	TEKT3	1	5	0	0	0	0	0	0	0	0	0	0	0	0	0	0	0	0	0	0	0	0	0	0	0	0	0	0	0	0	0	0	0	0	0	0	0	0	0	0	0	0	0	0	0
chr10	70209205	70218817	-	PPA1	1	2	0	0	0	0	0	0	0	0	0	0	0	0	0	0	0	0	0	0	0	0	0	0	0	0	0	0	0	0	0	0	0	0	0	0	0	0	0	0	0	0	0	0	0
chr17	1534099	1538952	-	PITPNA	1	2	0	0	0	0	0	0	0	0	0	0	0	0	0	0	0	0	0	0.00937882	0	0	0	0	0	0	0	0	0	0	0	0	0	0	0	0	0	0	0	0	0	0	0	0	0
chr17	1534099	1541640	-	PITPNA	1	1	0	0	0	0	0	0	0	0	0	0	0	0	0	0	0	0	0	0	0	0	0	0	0	0	0	0	0	0	0	0	0	0	0	0	0	0	0	0	0	0.005728	0	0	0
chr17	1534099	1548387	-	PITPNA	1	4	0	0	0	0	0	0	0	0	0	0	0	0	0	0	0	0	0	0	0	0	0	0	0	0	0.0143901	0	0	0	0	0	0	0	0	0	0	0	0	0.00773231	0	0	0	0	0
chr17	1534099	1558559	-	PITPNA	1	8	0	0	0	0	0	0	0	0	0	0	0	0	0	0	0	0	0	0	0	0	0	0	0	0	0	0.0128174	0	0	0	0	0	0	0	0	0	0	0	0	0	0	0	0	0
chr17	1538869	1553149	-	PITPNA	1	2	0	0	0	0	0	0	0	0	0	0	0	0	0	0	0	0	0	0	0	0.0177355	0	0	0	0	0	0	0	0	0	0	0	0.0127873	0	0	0	0	0	0	0	0	0	0	0
chr17	1541566	1553149	-	PITPNA	1	2	0	0	0	0	0	0	0	0	0	0	0	0	0	0	0	0	0	0	0	0	0	0	0	0	0	0	0	0	0	0	0	0	0	0	0	0	0	0	0	0	0	0	0
chr17	1543020	1558559	-	PITPNA	1	2	0	0	0	0	0	0	0.0104492	0	0	0	0	0	0	0	0	0	0	0	0	0	0	0	0	0	0	0.0128174	0	0	0	0	0	0	0	0	0	0	0	0	0	0	0	0	0
chr17	1548296	1553149	-	PITPNA	1	20	0	0	0	0	0	0	0	0	0	0	0	0	0	0.0145222	0	0	0	0	0	0	0.0105441	0	0	0	0	0	0.00847806	0	0	0	0	0	0	0	0	0.0174408	0	0	0.0131307	0	0	0	0
chr1	71592817	71611146	-	NEGR1	1	1	0	0	0	0	0	0	0	0	0	0	0	0	0	0	0	0	0	0	0	0	0.0105441	0	0	0	0	0	0	0	0	0	0	0	0	0	0	0	0	0	0	0	0	0	0
chr17	15978044	15993778	-	ZSWIM7	1	1	0	0	0	0	0	0	0	0.0113022	0	0	0	0	0	0	0	0	0	0	0	0	0	0	0	0	0	0	0	0	0	0	0	0	0	0	0	0	0	0	0	0	0	0	0
chr10	70209205	70230399	-	PPA1	1	1	0	0	0	0	0	0	0	0	0	0	0	0	0	0	0	0	0	0	0	0	0	0	0	0	0	0	0	0	0	0	0	0	0	0	0	0	0	0	0	0	0	0	0
chr17	16006568	16001915	+	TTC19	1	50	0	0	0.0311446	0	0	0	0.0104492	0.0113022	0	0	0	0	0.0195497	0	0	0	0	0	0	0	0.0210882	0	0	0	0.0287802	0	0.00847806	0.0148968	0	0	0.0102477	0	0	0	0	0	0.0393792	0.00773231	0.0262614	0.011456	0.0191802	0	0
chr17	16034765	16039654	-	NCOR1	1	4	0	0	0	0	0	0	0	0	0	0	0	0	0	0	0	0	0	0	0	0	0.0105441	0	0	0	0	0	0	0	0.0152018	0	0	0	0	0	0	0	0	0	0	0	0	0.00800603	0
chr17	16034765	16040494	-	NCOR1	1	4	0	0	0	0	0	0	0.0104492	0	0	0	0	0	0	0	0	0	0	0	0	0	0	0	0	0	0	0	0	0	0	0	0	0	0	0	0	0	0	0	0	0	0	0	0
chr17	16034765	16048988	-	NCOR1	1	3	0	0	0	0	0	0	0	0	0	0	0	0	0	0	0	0	0	0	0	0	0	0	0	0	0	0	0	0	0	0	0	0	0	0	0	0	0	0	0	0	0	0	0
chr17	16064870	16068121	-	NCOR1	1	2	0	0	0	0	0	0	0	0	0	0	0	0	0	0	0	0	0	0	0	0	0	0	0	0	0	0	0.00847806	0	0	0	0	0	0	0	0	0	0	0	0	0	0	0	0
chr17	16071409	16073569	-	NCOR1	1	2	0	0	0	0	0	0	0	0	0	0	0	0	0	0	0	0.013398	0	0	0	0	0	0	0	0	0	0	0	0	0	0	0	0	0	0	0	0	0	0	0	0	0	0	0
chr17	16071409	16075702	-	NCOR1	1	2	0	0	0	0	0	0	0	0	0	0	0	0	0	0	0	0	0	0	0	0	0	0	0	0	0	0	0	0	0	0	0	0	0	0	0	0	0	0	0	0	0	0	0
chr17	16098367	16101805	-	NCOR1	1	3	0	0	0	0	0	0	0	0	0	0	0	0	0	0	0	0.013398	0	0	0	0	0	0	0	0	0	0	0	0	0	0	0	0	0	0	0	0	0	0	0	0	0	0	0
chr17	16101250	16101757	-	NCOR1	1	1	0	0	0	0	0	0	0	0	0	0	0	0	0	0	0	0	0	0	0	0	0	0	0	0	0	0	0	0	0	0	0	0	0	0	0	0	0	0	0	0	0	0	0
chr17	16101250	16101805	-	NCOR1	1	19	0	0	0	0	0	0.00897101	0.0104492	0.0113022	0	0	0	0	0	0	0	0	0	0	0	0	0	0	0	0.01967	0	0	0	0	0	0.0209643	0	0	0	0	0	0	0	0.00773231	0.0131307	0.005728	0	0.00800603	0
chr10	70217812	70218817	-	PPA1	1	2	0	0	0	0	0	0	0	0	0	0	0	0	0	0	0	0	0	0.0187576	0	0	0	0	0	0	0	0	0	0	0	0	0	0	0	0	0	0	0	0	0	0	0	0	0
chr17	16108786	16146548	-	NCOR1	1	1	0	0	0	0	0	0	0	0	0	0	0	0	0	0	0	0	0	0	0	0	0	0	0	0	0	0	0	0	0	0	0	0	0	0	0	0	0	0	0	0	0	0	0
chr17	16117888	16139186	-	NCOR1	1	1	0	0	0	0	0	0	0	0	0	0	0	0	0	0	0	0	0	0	0	0	0	0	0	0	0	0	0	0	0	0	0	0	0	0	0	0	0	0	0	0	0	0	0
chr17	16117888	16149517	-	NCOR1	1	1	0	0	0	0	0	0	0	0	0	0	0	0	0	0	0	0	0	0	0	0	0	0	0	0	0	0	0	0	0	0	0.0102477	0	0	0	0	0	0	0	0	0	0	0	0
chr17	16126082	16146548	-	NCOR1	1	10	0	0	0	0	0	0	0	0	0	0	0	0	0	0.0290444	0	0	0.0104998	0	0	0	0	0	0	0.01967	0	0	0.00847806	0.0148968	0	0	0	0	0	0	0	0	0	0	0	0	0	0	0
chr17	16137311	16143696	-	NCOR1	1	1	0	0	0	0	0	0.00897101	0	0	0	0	0	0	0	0	0	0	0	0	0	0	0	0	0	0	0	0	0	0	0	0	0	0	0	0	0	0	0	0	0	0	0	0	0
chr17	16137311	16146548	-	NCOR1	1	10	0	0	0	0	0	0.00897101	0	0.0226044	0	0	0	0	0	0.0145222	0	0	0	0	0	0	0	0	0.0103481	0	0	0	0	0	0	0	0	0	0	0	0	0	0	0	0	0	0	0	0
chr17	16137311	16153395	-	NCOR1	1	2	0	0	0	0	0	0	0	0	0	0	0	0	0	0	0	0	0	0	0	0	0	0	0	0	0	0	0	0	0	0	0	0	0	0	0	0	0	0	0	0	0	0	0
chr17	16139008	16143696	-	NCOR1	1	6	0	0	0	0	0	0	0	0	0	0	0	0	0	0	0.0143092	0	0	0	0	0	0.0105441	0	0	0	0	0	0	0.0148968	0	0	0	0	0	0	0	0	0	0	0	0.005728	0	0	0
chr17	16143606	16153395	-	NCOR1	1	1	0	0	0	0	0	0	0	0	0	0	0	0	0	0.0145222	0	0	0	0	0	0	0	0	0	0	0	0	0	0	0	0	0	0	0	0	0	0	0	0	0	0	0	0	0
chr17	16326905	16299888	+	PIGL	1	1	0	0	0	0	0	0	0	0	0	0	0	0	0	0	0	0	0	0	0	0	0.0105441	0	0	0	0	0	0	0	0	0	0	0	0	0	0	0	0	0	0	0	0	0	0
chr10	70851210	70844473	+	SGPL1	1	1	0	0	0	0	0	0	0	0	0	0	0	0	0	0	0	0	0	0	0	0	0	0	0	0	0	0	0	0	0	0	0.0102477	0	0	0	0	0	0	0	0	0	0	0	0
chr17	16326905	16313547	+	PIGL	1	1	0	0	0	0	0	0	0	0	0	0	0	0	0	0	0	0	0	0	0	0	0	0	0	0	0	0	0	0	0	0	0	0	0	0	0	0	0	0	0	0	0	0	0
chr17	16326905	16325800	+	PIGL	1	4	0	0	0	0	0.0251472	0	0	0	0	0	0	0	0	0.0145222	0	0	0	0	0	0	0	0	0	0	0	0	0	0	0	0	0	0	0	0	0	0	0	0	0	0.005728	0	0	0
chr17	1636709	1637062	-	SCARF1	1	10	0	0	0	0	0	0	0	0	0	0.0162073	0	0	0	0	0	0	0	0	0	0	0	0	0	0	0	0	0.0169561	0	0	0.0104822	0	0	0	0	0	0	0	0	0	0	0	0.00800603	0
chr1	71698008	71935311	-	NEGR1	1	7	0	0	0	0	0	0	0	0	0	0	0	0	0	0	0	0	0	0	0	0	0	0	0	0.01967	0	0	0	0	0	0	0	0	0	0	0	0	0	0	0	0	0	0	0
chr17	17214985	17219209	-	FLCN	1	6	0	0	0	0	0	0	0	0	0	0	0	0	0	0	0	0	0	0	0	0	0	0	0	0	0	0	0	0	0	0	0	0	0	0	0	0	0	0.00773231	0	0.005728	0	0	0
chr17	17214985	17222661	-	FLCN	1	1	0	0	0	0	0	0	0	0	0	0	0	0	0	0	0.0143092	0	0	0	0	0	0	0	0	0	0	0	0	0	0	0	0	0	0	0	0	0	0	0	0	0	0	0	0
chr17	17254859	17264981	-	COPS3	1	1	0	0	0	0	0	0	0	0	0	0	0	0	0	0	0	0	0	0	0	0	0	0	0	0	0	0	0	0	0	0	0	0	0	0	0	0	0	0	0	0	0	0	0
chr17	17261966	17264981	-	COPS3	1	1	0	0	0	0	0	0	0	0	0	0	0	0	0	0	0	0	0	0	0	0	0	0	0	0.01967	0	0	0	0	0	0	0	0	0	0	0	0	0	0	0	0	0	0	0
chr1	71776172	71935311	-	NEGR1	1	6	0	0	0	0	0.0251472	0	0	0	0	0	0	0	0	0	0	0	0	0	0	0	0	0	0	0	0	0	0	0	0	0	0	0	0	0	0	0	0	0	0	0	0	0	0
chr17	17861476	17869473	-	TOM1L2	1	1	0	0	0	0	0	0	0	0	0	0	0	0	0	0	0	0.013398	0	0	0	0	0	0	0	0	0	0	0	0	0	0	0	0	0	0	0	0	0	0	0	0	0	0	0
chr10	70859499	70844473	+	SGPL1	1	80	0.0132985	0.018373	0.0155723	0.0244509	0	0.00897101	0	0	0	0.0162073	0.0450957	0	0	0	0.0143092	0.013398	0.0209997	0	0.0207708	0.0177355	0.0738089	0	0.0206962	0.01967	0.0431703	0.0512697	0.0254342	0.0446905	0.0152018	0	0.0102477	0.0255745	0	0	0	0	0	0.0154646	0	0.011456	0	0.0160121	0.015239
chr17	17866296	17869473	-	TOM1L2	1	2	0	0	0	0	0	0	0.0104492	0	0	0	0	0	0	0	0	0	0	0	0	0	0	0	0	0	0	0	0	0	0	0	0	0	0	0	0	0	0	0	0	0	0	0	0
chr17	17884634	17893810	-	TOM1L2	1	1	0	0	0	0	0	0	0	0	0	0	0	0	0	0	0	0	0	0	0	0	0	0	0	0	0	0	0	0	0	0	0.0102477	0	0	0	0	0	0	0	0	0	0	0	0
chr17	1799857	1801024	-	SMYD4	1	1	0	0	0	0	0	0	0	0	0	0	0	0	0	0	0	0	0	0	0	0	0	0	0	0	0	0	0	0	0	0	0	0	0	0	0.0282301	0	0	0	0	0	0	0	0
chr17	18021123	18026416	-	ATPAF2	1	34	0	0.0367461	0.0467169	0	0	0	0.0104492	0	0	0	0	0	0.0195497	0.0290444	0	0	0	0.00937882	0	0	0.0105441	0	0	0	0.0143901	0	0.00847806	0	0	0.0209643	0	0	0	0	0	0	0	0	0	0	0	0	0
chr17	18021123	18028659	-	ATPAF2	1	3	0	0	0	0	0	0	0	0	0	0	0	0	0	0	0.0143092	0	0	0	0	0	0	0	0	0	0	0	0	0	0	0	0	0	0	0	0	0	0	0	0	0	0	0	0
chr17	18024624	18028659	-	ATPAF2	1	2	0	0	0	0	0	0	0	0	0	0	0	0	0	0	0	0	0	0	0	0	0	0	0	0.01967	0	0	0	0	0	0	0	0	0	0	0	0	0	0	0	0	0	0	0
chr17	18292645	18306966	-	TOP3A	1	2	0	0	0	0	0	0	0	0	0	0	0	0	0	0	0	0	0	0	0	0	0	0	0	0	0	0	0	0	0	0	0	0	0	0	0	0	0	0	0	0	0	0.00800603	0
chr17	18294703	18306966	-	TOP3A	1	2	0	0	0	0	0	0	0	0	0	0	0	0	0	0	0	0	0	0	0	0	0	0	0	0	0	0	0	0	0	0	0	0	0	0	0	0.0174408	0	0	0	0.005728	0	0	0
chr17	18294703	18307570	-	TOP3A	1	1	0	0	0	0	0	0	0	0	0	0	0	0	0	0	0	0	0	0	0	0	0	0	0	0	0	0	0.00847806	0	0	0	0	0	0	0	0	0	0	0	0	0	0	0	0
chr17	18305112	18306966	-	TOP3A	1	2	0	0	0	0	0	0	0	0	0	0	0	0	0	0	0	0	0	0	0	0	0	0	0	0	0	0	0	0	0	0	0	0	0	0	0	0	0	0	0	0	0	0	0
chr10	70868433	70844473	+	SGPL1	1	14	0	0	0	0	0	0	0	0.0226044	0.0215419	0	0	0.0274061	0	0	0	0	0	0	0	0	0	0	0	0	0	0	0	0	0	0.0104822	0	0	0.0300755	0	0	0	0	0	0	0	0	0	0
chr17	1844686	1842803	+	RPA1	1	4	0	0	0	0	0	0	0	0	0	0	0	0	0	0	0	0	0	0	0	0	0.0105441	0	0	0	0	0	0	0	0	0	0	0	0	0	0	0	0	0	0	0	0	0	0
chr17	1853189	1842803	+	RPA1	1	17	0	0	0	0	0	0	0	0	0	0	0	0	0	0	0.0143092	0	0.0104998	0	0	0	0.0316324	0	0	0	0	0	0.00847806	0	0	0.0209643	0	0	0	0	0	0	0	0	0	0	0	0	0
chr17	18705164	18704619	+	TRIM16L	1	2	0	0	0	0	0	0	0	0	0	0	0	0	0	0	0	0	0	0.00937882	0	0	0	0	0	0	0	0	0	0	0	0	0	0	0	0	0	0	0	0	0	0	0	0.00800603	0
chr17	1880691	1875661	+	RPA1	1	1	0	0	0	0	0	0	0	0	0	0	0	0	0	0	0	0	0	0	0	0	0	0	0	0	0	0	0.00847806	0	0	0	0	0	0	0	0	0	0	0	0	0	0	0	0
chr17	1883944	1875661	+	RPA1	1	2	0	0	0	0	0	0	0	0	0	0	0.0225478	0	0	0	0	0	0	0	0	0	0	0	0	0	0	0.0128174	0	0	0	0	0	0	0	0	0	0	0	0	0	0	0	0	0
chr17	18865952	18865469	+	PRPSAP2	1	10	0	0	0	0	0	0	0	0	0	0	0	0	0.0195497	0	0	0	0	0	0	0	0	0	0	0	0	0	0.00847806	0	0	0	0	0	0	0	0	0.0174408	0	0	0	0	0	0	0
chr17	18867334	18865469	+	PRPSAP2	1	10	0	0	0	0	0	0	0	0	0.0215419	0	0	0	0	0	0	0	0	0	0	0	0	0	0	0.0393401	0	0	0	0	0	0.0104822	0	0	0	0	0	0	0.0393792	0.00773231	0	0	0	0	0
chr17	18872649	18865469	+	PRPSAP2	1	3	0	0	0	0	0	0	0.0104492	0	0	0	0	0	0	0	0	0	0	0	0	0	0	0	0	0	0	0	0	0	0	0	0	0	0	0	0	0	0	0	0	0	0	0	0
chr17	18877870	18865469	+	PRPSAP2	1	14	0	0	0	0	0	0	0	0	0	0	0.0225478	0	0	0	0	0	0	0	0	0	0.0105441	0	0	0	0	0.0256349	0	0	0.0152018	0	0.0102477	0	0	0	0	0	0	0	0	0	0	0.00800603	0
chr17	18877870	18865802	+	PRPSAP2	1	2	0.0132985	0	0	0	0	0	0	0	0	0	0	0	0	0	0	0	0	0	0	0	0	0	0	0	0	0	0	0	0	0	0	0	0	0	0	0	0	0	0	0	0	0	0
chr10	70871986	70844473	+	SGPL1	1	4	0.0132985	0	0	0	0	0	0	0	0	0	0	0	0	0	0	0	0	0	0	0	0.0105441	0	0	0	0	0	0	0	0	0	0	0	0	0	0	0	0	0	0	0	0	0	0
chr17	18877870	18867282	+	PRPSAP2	1	17	0	0	0	0	0.0251472	0.00897101	0	0	0	0	0	0	0	0	0	0	0	0	0	0	0	0	0.0103481	0	0.0143901	0	0	0	0	0	0	0	0	0	0	0.0174408	0	0	0	0	0	0	0
chr17	18877870	18872583	+	PRPSAP2	1	2	0	0	0	0	0	0	0	0	0	0	0	0	0	0	0	0	0	0	0	0	0.0105441	0	0	0	0	0	0	0	0	0	0	0	0	0	0	0	0	0	0	0	0	0	0
chr17	18889877	18865469	+	PRPSAP2	1	10	0	0	0	0	0	0.017942	0	0	0	0	0	0	0	0	0	0	0	0	0	0	0.0210882	0	0.0103481	0	0	0	0.0254342	0	0	0	0.0102477	0	0	0	0	0	0	0	0	0	0	0	0
chr17	18889877	18867282	+	PRPSAP2	1	1	0	0	0	0	0	0	0	0	0	0	0	0.013703	0	0	0	0	0	0	0	0	0	0	0	0	0	0	0	0	0	0	0	0	0	0	0	0	0	0	0	0	0	0	0
chr17	18889877	18872583	+	PRPSAP2	1	1	0	0	0	0	0	0	0	0	0	0	0	0	0	0	0	0	0	0	0	0	0	0	0	0	0	0.0128174	0	0	0	0	0	0	0	0	0	0	0	0	0	0	0	0	0
chr17	18911251	18865469	+	PRPSAP2	1	14	0	0	0	0	0	0	0	0.0113022	0	0	0	0	0	0.0145222	0	0	0	0	0	0	0	0	0.0103481	0	0	0.0128174	0	0.0297937	0	0	0	0	0	0	0	0	0	0	0	0	0	0	0.015239
chr17	18911251	18865802	+	PRPSAP2	1	2	0	0	0	0	0.0251472	0	0	0	0	0	0	0	0	0	0	0	0	0	0.0207708	0	0	0	0	0	0	0	0	0	0	0	0	0	0	0	0	0	0	0	0	0	0	0	0
chr17	18928957	18911103	+	PRPSAP2	1	2	0	0.018373	0	0	0	0	0	0	0	0	0	0	0	0	0	0	0	0	0	0	0	0	0	0	0	0	0	0	0	0	0	0	0	0	0	0	0	0	0	0	0	0	0
chr17	19312144	19281955	+	EPN2	1	1	0	0	0	0	0	0	0	0	0	0	0	0	0	0	0.0143092	0	0	0	0	0	0	0	0	0	0	0	0	0	0	0	0	0	0	0	0	0	0	0	0	0	0	0	0
chr17	19329647	19309885	+	EPN2	1	60	0.0132985	0.018373	0	0.0244509	0	0.00897101	0	0.0113022	0.0215419	0	0	0	0.058649	0	0	0	0.0104998	0.0187576	0	0	0.0316324	0	0	0	0	0	0.0169561	0	0	0	0.0204954	0.0255745	0.0300755	0.0197506	0	0.0348817	0	0.0154646	0	0.011456	0.0191802	0.00800603	0.015239
chr10	71732375	71724045	+	CDH23	1	1	0	0	0	0	0	0	0	0	0	0	0	0	0.0195497	0	0	0	0	0	0	0	0	0	0	0	0	0	0	0	0	0	0	0	0	0	0	0	0	0	0	0	0	0	0
chr1	71935079	71935311	-	NEGR1	1	1	0	0	0	0	0	0	0	0	0	0	0	0	0	0	0	0	0	0	0	0	0	0	0	0	0	0	0	0	0	0	0	0	0	0	0	0	0	0	0	0.005728	0	0	0
chr17	19657862	19651547	+	ALDH3A2	1	4	0	0	0	0	0	0	0	0	0	0	0	0	0	0	0	0	0	0	0	0	0	0	0	0	0	0	0	0	0	0	0	0	0	0	0	0	0	0	0	0	0	0	0
chr17	19671956	19651547	+	ALDH3A2	1	19	0	0	0	0	0	0	0	0	0	0	0	0	0.0390993	0	0	0	0	0.00937882	0	0	0.0105441	0	0	0	0	0	0.00847806	0	0	0	0.0102477	0.0255745	0	0	0	0	0	0.0154646	0	0	0	0.00800603	0
chr17	19795622	19801922	-	ULK2	1	1	0	0	0	0	0	0	0	0	0	0	0	0	0	0	0	0	0	0	0	0	0	0	0	0	0	0	0	0	0	0	0	0	0	0	0	0	0	0	0	0.011456	0	0	0
chr17	19795622	19804830	-	ULK2	1	10	0	0.018373	0	0	0	0	0	0	0	0	0	0	0	0	0	0	0	0	0	0	0	0	0	0	0	0	0	0	0	0	0	0	0	0	0	0	0	0.00773231	0	0	0	0	0
chr17	19810378	19826186	-	ULK2	1	1	0	0	0	0	0	0	0	0	0	0	0	0	0	0	0	0	0	0.00937882	0	0	0	0	0	0	0	0	0	0	0	0	0	0	0	0	0	0	0	0	0	0	0	0	0
chr17	19816749	19826186	-	ULK2	1	15	0	0	0.0155723	0	0	0	0	0	0	0	0	0.013703	0.0195497	0	0	0	0	0	0	0	0	0	0	0	0	0	0.00847806	0	0	0	0	0	0	0	0	0	0	0	0	0	0	0	0
chr17	19816749	19838583	-	ULK2	1	4	0	0	0	0	0	0	0	0	0	0	0	0	0	0	0	0	0	0	0	0	0	0	0	0	0	0	0	0	0	0	0	0	0	0	0	0	0.0196896	0	0	0	0	0.00800603	0
chr17	19816749	19849774	-	ULK2	1	4	0	0	0	0	0	0	0	0.0113022	0	0	0	0	0	0	0	0	0	0	0	0	0	0	0	0	0	0	0	0	0	0	0	0	0	0	0	0	0	0	0	0	0	0	0
chr17	19825094	19849774	-	ULK2	1	3	0	0	0	0	0	0	0	0	0	0	0	0	0	0	0	0	0	0	0	0	0	0	0	0	0	0.0128174	0	0	0	0	0	0	0	0	0	0	0	0	0	0	0	0	0
chr10	105201253	105178066	+	SORCS3	1	8	0	0	0	0	0	0	0	0.0113022	0	0	0	0	0	0	0	0	0.0104998	0	0.0207708	0	0	0	0	0	0	0	0	0	0	0	0	0	0	0	0	0	0	0	0	0	0	0	0
chr10	71732375	71730469	+	CDH23	1	11	0	0	0	0.0244509	0	0	0	0	0	0	0	0.013703	0	0	0	0	0	0	0	0	0	0	0	0	0	0	0.00847806	0	0	0	0	0	0	0	0	0	0	0	0	0.005728	0	0	0
chr17	19838501	19843222	-	ULK2	1	1	0	0	0	0	0	0	0	0	0	0	0	0	0	0	0	0	0	0	0	0	0	0	0	0	0	0	0	0	0	0	0	0	0	0	0	0	0	0	0	0.005728	0	0	0
chr17	19838501	19846910	-	ULK2	1	1	0	0	0.0155723	0	0	0	0	0	0	0	0	0	0	0	0	0	0	0	0	0	0	0	0	0	0	0	0	0	0	0	0	0	0	0	0	0	0	0	0	0	0	0	0
chr17	19909181	19924517	-	AKAP10	1	13	0	0	0	0	0	0	0	0	0	0	0.0225478	0	0	0	0	0	0	0	0	0	0.0105441	0	0	0	0	0.0128174	0	0.0148968	0	0	0	0	0	0	0	0	0	0	0	0.005728	0	0	0
chr17	19909181	19963022	-	AKAP10	1	4	0	0	0	0	0	0	0	0	0	0	0	0	0	0	0	0	0	0	0	0	0.0210882	0	0.0103481	0	0	0	0	0	0	0	0	0	0	0	0	0	0	0	0	0	0.0191802	0	0
chr17	19920036	19936430	-	AKAP10	1	10	0	0	0	0	0	0	0	0	0	0	0	0	0	0	0	0	0.0104998	0	0	0	0	0	0	0	0	0	0	0	0	0	0	0	0	0.0197506	0	0	0.0196896	0	0	0	0	0	0
chr17	19920036	19947505	-	AKAP10	1	4	0	0	0	0	0	0	0	0	0	0	0	0	0	0	0	0	0	0	0	0	0	0	0	0	0	0	0	0	0	0	0	0	0	0.0197506	0	0	0	0	0	0	0	0	0
chr17	19920036	19963022	-	AKAP10	1	8	0	0	0	0	0	0	0	0	0	0	0	0	0	0.0145222	0	0	0	0	0	0	0	0	0	0	0	0	0	0	0	0	0.0102477	0	0	0	0	0	0	0	0	0.011456	0	0	0
chr17	19920036	19968461	-	AKAP10	1	3	0	0	0	0	0	0	0	0	0	0	0	0	0	0	0	0	0	0	0	0	0	0	0	0	0	0	0	0	0	0	0	0	0	0	0	0	0	0	0	0	0	0	0
chr17	19924408	19963022	-	AKAP10	1	1	0	0	0	0	0	0	0.0104492	0	0	0	0	0	0	0	0	0	0	0	0	0	0	0	0	0	0	0	0	0	0	0	0	0	0	0	0	0	0	0	0	0	0	0	0
chr17	19931805	19958571	-	AKAP10	1	6	0	0	0	0	0	0	0	0	0	0	0	0	0	0	0	0	0	0.00937882	0	0	0.0105441	0	0	0	0	0	0	0	0	0	0	0	0	0	0	0	0	0	0	0	0	0	0
chr10	7188624	7285954	-	SFMBT2	1	3	0	0	0	0	0	0	0	0	0	0	0	0	0	0	0	0	0	0	0	0	0.0105441	0	0	0	0	0	0	0	0	0	0	0	0	0	0	0	0	0	0	0	0	0	0
chr17	19931805	19963022	-	AKAP10	1	2	0	0	0	0	0	0	0	0	0	0	0	0	0	0	0	0	0	0	0	0	0	0	0	0	0	0	0	0	0	0	0	0.0127873	0	0	0	0	0	0	0	0	0	0	0
chr17	19931805	19968461	-	AKAP10	1	2	0	0	0	0	0	0	0	0	0	0	0	0	0	0	0	0	0	0	0	0	0	0	0	0	0	0	0	0	0	0	0	0	0	0.0197506	0	0	0	0	0	0	0	0	0
chr17	19936286	19958571	-	AKAP10	1	2	0	0	0	0	0	0	0	0	0	0	0.0225478	0	0	0	0	0	0	0	0	0	0	0	0	0	0	0	0	0	0	0	0	0	0	0	0	0	0	0	0	0	0	0	0
chr17	19939713	19947505	-	AKAP10	1	1	0	0	0	0	0	0	0	0	0	0	0	0	0	0	0	0	0	0	0	0	0	0	0	0	0	0	0	0	0	0	0	0	0	0	0	0	0	0	0	0	0	0.00800603	0
chr17	19939713	19958571	-	AKAP10	1	12	0	0	0	0	0	0	0.0104492	0	0	0	0	0	0	0	0	0	0	0	0	0	0	0	0	0	0	0	0.00847806	0.0148968	0	0	0	0	0	0	0	0	0	0	0	0	0	0	0
chr17	19939713	19963022	-	AKAP10	1	6	0	0	0	0	0	0	0	0	0	0	0	0	0	0.0145222	0	0	0	0.00937882	0	0	0	0	0	0	0	0	0	0	0	0.0104822	0	0	0	0	0	0	0	0	0	0	0	0	0
chr17	19939713	19968461	-	AKAP10	1	5	0	0	0.0155723	0	0	0	0	0	0	0	0	0	0	0	0	0	0	0	0	0	0	0	0.0103481	0	0	0	0	0	0	0	0	0	0	0	0	0	0	0	0	0.005728	0	0	0
chr17	19947407	19958571	-	AKAP10	1	2	0	0	0	0	0	0	0	0	0	0	0	0	0	0	0	0	0	0	0	0	0	0	0	0	0	0	0	0	0	0	0	0	0	0	0	0	0	0	0	0.005728	0	0	0
chr17	19947407	19968461	-	AKAP10	1	3	0	0	0	0	0	0	0	0	0	0	0	0	0	0	0	0	0	0	0	0	0	0	0	0	0	0	0	0	0	0	0	0	0	0	0	0	0	0	0	0	0	0	0
chr17	19958014	19958571	-	AKAP10	1	12	0	0	0.0155723	0	0.0251472	0	0	0	0	0	0	0	0	0	0.0143092	0	0	0	0	0	0.0105441	0	0.0103481	0	0	0.0128174	0	0	0	0	0	0.0127873	0	0	0	0	0	0	0	0	0	0	0
chr10	7188624	7381949	-	SFMBT2	1	1	0	0	0	0	0	0	0.0104492	0	0	0	0	0	0	0	0	0	0	0	0	0	0	0	0	0	0	0	0	0	0	0	0	0	0	0	0	0	0	0	0	0	0	0	0
chr17	19958014	19968461	-	AKAP10	1	1	0	0	0	0	0	0	0.0104492	0	0	0	0	0	0	0	0	0	0	0	0	0	0	0	0	0	0	0	0	0	0	0	0	0	0	0	0	0	0	0	0	0	0	0	0
chr17	20110562	20017987	+	SPECC1	1	80	0.0132985	0.018373	0.0622892	0	0	0.026913	0.0208984	0.0113022	0.0215419	0.0162073	0.0450957	0.0548122	0	0.072611	0.0286185	0	0.0209997	0.0468941	0	0	0.0105441	0	0.0310443	0.0393401	0	0.0256349	0.0678244	0	0	0.0314465	0	0.0383618	0	0	0.11292	0	0	0	0.0262614	0	0	0.0240181	0
chr17	20110562	20096631	+	SPECC1	1	31	0	0	0.0155723	0	0	0	0.0208984	0	0	0	0	0.013703	0	0	0	0.013398	0.0104998	0	0	0	0.0210882	0	0	0	0	0.0128174	0.0169561	0	0	0	0	0	0	0	0	0	0	0.0154646	0	0.011456	0	0.0160121	0
chr17	20205912	20204333	+	SPECC1	1	133	0.0265971	0.128611	0.233585	0.171156	0.100589	0.0627971	0.0835938	0.124324	0.344671	0.0810364	0.180383	0.109624	0.0195497	0.1307	0.128783	0.107184	0.0944986	0.168819	0.124625	0.0354709	0.0948971	0.106755	0.144873	0	0.100731	0.128174	0.101737	0.32773	0.258431	0.104822	0.102477	0.153447	0.180453	0.118504	0.310531	0.122086	0.0787584	0.0927877	0.131307	0.17184	0.095901	0.152115	0.0914339
chr17	20227620	20204333	+	SPECC1	1	1	0	0	0	0	0	0	0	0	0	0	0	0	0	0	0	0	0	0	0	0	0	0	0	0	0	0	0	0	0	0	0	0	0	0	0	0	0	0	0	0	0	0	0
chr17	20232405	20204333	+	SPECC1	1	9	0	0	0	0	0	0	0	0	0	0	0	0	0	0	0	0	0	0.00937882	0	0	0.0105441	0	0.0206962	0	0	0.0128174	0	0	0	0	0	0	0	0	0	0	0	0	0	0	0	0	0
chr17	20232405	20231758	+	SPECC1	1	30	0	0	0	0	0	0	0	0.0113022	0.0215419	0	0	0	0	0	0	0	0.0104998	0	0	0	0	0	0.0103481	0	0	0.0256349	0	0	0	0.0104822	0	0	0	0	0	0.0348817	0	0	0	0.011456	0	0.0160121	0
chr17	20232414	20204333	+	SPECC1	1	3	0	0	0	0	0	0	0	0	0	0	0	0	0	0.0145222	0	0	0	0	0	0	0	0	0	0	0	0	0	0	0	0	0	0	0	0	0	0	0	0	0	0	0	0	0
chr17	20260294	20247219	+	SPECC1	1	4	0	0	0	0	0	0	0	0	0	0	0	0	0	0	0	0	0	0	0	0	0	0	0	0	0	0	0	0	0.0152018	0	0	0	0	0	0	0	0	0	0	0	0	0	0
chr17	20260294	20253505	+	SPECC1	1	26	0.0132985	0	0	0	0	0	0	0	0	0	0.0225478	0	0	0	0	0	0	0.0281364	0	0	0	0	0	0	0	0.0256349	0	0.0297937	0	0.0209643	0	0.0127873	0	0	0	0	0	0	0	0	0	0	0
chr10	7197548	7285954	-	SFMBT2	1	1	0	0	0	0.0244509	0	0	0	0	0	0	0	0	0	0	0	0	0	0	0	0	0	0	0	0	0	0	0	0	0	0	0	0	0	0	0	0	0	0	0	0	0	0	0
chr17	20260294	20257451	+	SPECC1	1	2	0	0	0	0	0	0	0	0	0	0	0	0	0	0	0	0	0	0	0	0	0	0	0	0	0	0	0	0	0	0	0	0	0	0	0	0	0	0	0	0	0	0	0
chr17	20306082	20253505	+	SPECC1	1	7	0	0	0	0	0	0	0	0.0113022	0	0	0	0	0.0195497	0	0	0	0	0	0	0	0	0	0	0	0	0	0	0	0	0	0	0	0	0	0	0	0	0.00773231	0	0	0	0	0
chr17	21006896	21011309	-	USP22	1	7	0	0	0	0	0	0	0	0	0	0	0	0	0	0.0145222	0	0	0	0.00937882	0	0	0	0	0.0206962	0	0	0	0	0	0	0	0	0.0127873	0	0	0	0	0	0	0	0	0	0	0
chr17	21011151	21015899	-	USP22	1	36	0	0	0	0	0.0251472	0.00897101	0.0313477	0.0113022	0	0	0.0225478	0.013703	0	0	0	0	0.0104998	0	0	0	0	0	0.0413924	0.01967	0	0.0128174	0	0	0	0.0104822	0	0.0255745	0	0	0	0	0	0	0	0	0	0.00800603	0
chr17	21017942	21021226	-	USP22	1	1	0	0	0	0	0	0	0	0	0	0	0	0	0	0	0	0	0	0	0	0	0	0	0	0	0	0	0	0	0.0152018	0	0	0	0	0	0	0	0	0	0	0	0	0	0
chr17	21017942	21028674	-	USP22	1	1	0	0	0	0	0	0	0	0	0	0	0	0	0	0	0	0	0	0	0	0	0.0210882	0	0	0	0	0	0	0	0	0	0	0	0	0	0	0	0	0	0	0	0	0	0
chr17	21529022	21535538	-	C17orf51	1	5	0	0	0	0	0	0	0	0	0	0	0	0	0	0	0	0	0	0	0	0	0	0	0	0	0	0	0	0	0	0	0	0	0	0	0	0	0	0	0	0.011456	0	0.00800603	0
chr17	2172658	2172859	-	SMG6	1	3	0	0	0	0	0	0	0	0	0	0	0	0	0	0	0	0	0	0	0	0	0	0	0	0	0	0	0	0	0	0	0	0	0	0	0	0	0	0	0	0.011456	0	0.00800603	0
chr17	2172658	2244719	-	SMG6	1	1	0	0	0	0	0	0.00897101	0	0	0	0	0	0	0	0	0	0	0	0	0	0	0	0	0	0	0	0	0	0	0	0	0	0	0	0	0	0	0	0	0	0	0	0	0
chr17	2282647	2283735	-	SMG6	1	2	0	0	0	0	0	0	0	0	0	0	0	0	0	0	0	0	0	0	0	0	0	0	0	0	0	0	0	0	0	0	0	0	0	0	0	0	0	0	0	0.005728	0	0	0
chr10	72128082	72152988	-	ASCC1	1	2	0	0	0	0	0	0	0	0	0	0	0	0	0	0	0	0	0	0	0	0	0	0	0	0	0	0	0	0	0	0	0	0	0	0	0	0	0	0	0	0.005728	0	0	0
chr17	2282647	2292977	-	SMG6	1	3	0	0	0	0	0	0	0	0.0113022	0	0	0	0	0	0	0	0	0	0	0	0	0	0	0	0	0	0	0	0	0	0.0104822	0	0	0	0	0	0	0	0	0	0	0	0	0
chr17	2297243	2300664	-	SMG6	1	6	0	0	0	0	0	0	0	0	0	0	0	0	0	0	0	0	0	0.0187576	0	0	0	0	0	0	0	0	0	0.0297937	0	0	0	0	0	0	0	0	0	0	0	0	0	0	0
chr17	2318929	2315557	+	SRR	1	6	0	0	0	0	0	0	0	0	0	0	0	0	0	0	0	0	0	0	0	0	0	0	0.0103481	0	0.0143901	0	0	0	0	0	0	0	0	0	0	0	0	0	0.0131307	0	0	0	0
chr17	2361799	2343545	+	SGSM2	1	1	0	0	0	0	0	0	0	0	0	0	0	0	0	0	0	0	0	0	0	0	0	0	0	0	0	0	0	0	0	0	0	0.0127873	0	0	0	0	0	0	0	0	0	0	0
chr17	2394043	2395454	-	MNT	1	18	0	0.018373	0	0	0	0	0.0104492	0	0	0	0	0	0	0	0	0	0	0	0	0	0	0	0	0	0	0	0.0254342	0	0	0	0	0	0	0	0	0	0	0	0	0	0	0	0
chr17	2438109	2467876	-	METTL16	1	3	0	0	0	0	0	0	0	0	0	0	0	0	0	0	0	0	0	0	0	0	0	0	0	0	0	0	0	0	0	0	0	0	0	0	0	0	0	0	0	0.005728	0	0	0
chr17	2438109	2473664	-	METTL16	1	2	0	0	0	0	0	0	0	0	0	0	0	0	0	0	0	0	0	0	0	0.0177355	0	0	0	0	0	0	0	0	0	0	0	0	0	0	0	0	0	0	0	0	0	0	0
chr17	2438109	2477885	-	METTL16	1	1	0	0	0	0	0	0	0	0	0	0	0	0	0	0	0	0	0	0	0	0	0.0105441	0	0	0	0	0	0	0	0	0	0	0	0	0	0	0	0	0	0	0	0	0	0
chr17	2638320	2635383	+	PAFAH1B1	1	1	0	0	0	0	0	0	0	0	0	0	0	0	0	0	0	0	0	0	0	0	0	0	0	0	0	0	0	0.0148968	0	0	0	0	0	0	0	0	0	0	0	0	0	0	0
chr17	2676606	2665372	+	PAFAH1B1	1	3	0	0	0	0	0	0	0	0	0	0	0	0	0	0	0	0	0	0	0	0	0	0	0	0	0	0	0	0	0	0	0	0	0	0	0	0	0	0.00773231	0	0	0	0	0
chr10	72152869	72203524	-	ASCC1	1	2	0	0	0	0	0	0	0	0	0	0	0	0	0	0	0	0	0	0	0	0	0	0	0	0	0	0	0	0	0	0	0	0.0127873	0	0	0	0	0	0	0	0	0	0	0
chr17	2680320	2676505	+	PAFAH1B1	1	1	0	0	0	0	0	0	0	0	0	0	0	0	0	0	0	0	0	0	0	0	0	0	0	0	0	0	0	0	0	0	0	0	0	0	0	0	0	0	0	0	0	0	0
chr17	27309272	27303367	+	WSB1	1	3	0	0	0	0	0	0	0	0	0	0.0162073	0	0	0	0	0	0	0	0	0	0	0	0	0	0	0	0	0	0	0	0	0	0	0	0	0	0	0	0	0	0	0	0	0
chr17	27309272	27304780	+	WSB1	1	3	0	0	0	0	0	0	0	0	0	0	0	0	0	0	0	0	0	0	0	0	0	0	0	0	0	0.0128174	0	0	0	0	0	0	0	0	0	0	0	0	0	0	0	0	0
chr17	27310174	27303367	+	WSB1	1	3	0	0	0	0	0	0	0	0	0	0	0	0	0	0	0	0	0	0	0	0	0	0	0	0	0	0	0.0169561	0	0	0	0	0	0	0	0	0	0.0196896	0	0	0	0	0	0
chr17	27610198	27605434	+	KSR1	1	1	0	0	0	0	0	0	0	0	0	0	0	0	0	0	0	0	0	0	0	0	0	0	0	0	0	0	0	0	0	0.0104822	0	0	0	0	0	0	0	0	0	0	0	0	0
chr17	27765535	27766588	-	NOS2	1	2	0	0	0	0	0	0	0	0	0	0	0	0	0	0	0	0	0	0	0	0	0	0	0	0	0	0	0	0	0	0	0	0	0	0	0	0	0	0	0	0	0	0	0
chr17	28163628	28122603	+	NLK	1	3	0	0	0	0	0	0	0	0	0	0	0	0	0	0	0	0	0	0	0	0	0	0	0	0	0	0	0	0	0.0152018	0	0	0	0	0	0	0	0	0	0	0	0	0	0
chr17	28168657	28122603	+	NLK	1	4	0	0	0	0	0	0	0	0	0	0	0.0225478	0	0	0	0	0	0	0	0	0	0	0	0	0	0	0	0	0	0	0	0	0	0	0	0	0	0	0.00773231	0	0	0	0	0
chr17	28168657	28132620	+	NLK	1	1	0	0	0	0	0	0	0	0	0	0	0	0	0	0	0	0	0	0	0	0	0	0	0	0	0	0	0.00847806	0	0	0	0	0	0	0	0	0	0	0	0	0	0	0	0
chr17	28168657	28163543	+	NLK	1	7	0	0	0	0	0	0	0	0	0	0	0.0225478	0	0	0	0	0	0	0	0	0	0.0105441	0	0	0	0.0287802	0	0	0	0	0	0	0.0127873	0	0	0	0	0	0	0	0	0	0	0
chr10	72196811	72203524	-	ASCC1	1	9	0	0	0	0	0	0.00897101	0	0	0	0	0	0	0	0	0	0	0	0	0	0	0.0105441	0	0	0	0	0	0	0	0	0	0	0	0	0	0	0	0	0	0	0.011456	0	0	0
chr17	28172618	28122603	+	NLK	1	123	0.0797912	0.128611	0.109006	0	0.17603	0.0717681	0.0731446	0.135626	0.193877	0.0486218	0.20293	0.150733	0.0977483	0	0.171711	0.026796	0.0944986	0.0844093	0.0830832	0	0.115985	0.0711703	0.0517405	0	0.0719504	0.217896	0.127171	0.134071	0	0.0943395	0.0819817	0.115085	0	0.158005	0.0846902	0.0872042	0.177206	0	0.105046	0.11456	0.095901	0.136102	0.106673
chr17	28172618	28132620	+	NLK	1	25	0	0	0	0	0	0	0	0	0.0430839	0.0162073	0	0	0	0.0435666	0	0	0	0.00937882	0	0.0709419	0	0	0	0	0	0.0769046	0.00847806	0	0	0	0.0204954	0	0	0	0	0	0	0	0	0	0	0.00800603	0
chr17	28172618	28163543	+	NLK	1	119	0	0.110238	0.109006	0.0489018	0.100589	0	0.0104492	0.0791155	0.0646258	0	0	0.0822183	0.136848	0.159744	0.0715462	0.053592	0.0734989	0.0656517	0.0830832	0.141884	0.126529	0.0533777	0.093133	0	0.0431703	0.0384523	0.0932586	0.104278	0.0608073	0.0524108	0.0307431	0	0.0300755	0.0987532	0.0564602	0	0.0787584	0.0773231	0.0787842	0.0859201	0.095901	0.104078	0
chr17	281768	321415	-	RPH3AL	1	2	0	0	0	0	0	0	0	0	0	0	0	0	0	0	0	0	0	0	0	0	0	0	0	0	0	0	0	0	0	0.0104822	0	0	0	0	0	0	0	0	0	0	0	0	0
chr17	28185265	28122603	+	NLK	1	3	0	0	0.0155723	0	0	0	0	0	0	0	0	0	0	0	0	0	0	0	0	0	0	0	0	0	0	0	0	0	0	0	0	0	0	0	0	0	0	0	0	0	0	0.00800603	0
chr17	28185265	28132620	+	NLK	1	1	0	0	0	0	0	0	0	0	0	0	0	0	0	0	0	0	0	0	0	0	0	0	0	0	0	0	0	0	0	0	0	0	0	0	0	0	0	0	0	0	0	0	0
chr17	28185265	28163543	+	NLK	1	15	0	0	0.0311446	0	0	0.00897101	0	0	0	0	0	0	0	0	0	0	0	0	0	0	0	0	0	0.01967	0	0.0256349	0	0	0	0	0	0	0	0.0197506	0	0	0.0393792	0	0	0	0	0	0.015239
chr17	28185265	28168448	+	NLK	1	11	0	0	0	0	0	0	0	0	0	0	0	0	0	0	0	0	0	0	0	0	0.0105441	0	0	0	0	0	0	0	0	0	0	0	0	0	0	0	0	0	0	0.005728	0	0	0
chr17	28350438	28351800	-	POLDIP2	1	2	0	0	0	0	0	0	0	0	0	0	0	0	0	0	0	0	0	0	0	0	0	0	0	0	0	0	0	0	0	0	0	0	0	0	0	0	0	0	0	0.005728	0	0	0
chr17	28683816	28681882	+	SUPT6H	1	3	0	0	0	0	0	0	0	0	0	0	0	0	0	0	0	0	0	0	0	0	0	0	0	0	0	0	0	0	0	0	0	0	0	0	0	0	0	0	0	0.005728	0	0	0
chr10	72196811	72210831	-	ASCC1	1	2	0	0	0	0	0	0	0	0	0	0	0	0	0	0	0	0	0.0104998	0	0	0	0	0	0	0	0	0	0	0	0	0	0	0	0	0	0	0	0	0	0	0	0	0	0
chr17	28917285	28921808	-	PHF12	1	2	0	0	0	0	0	0	0	0	0	0	0	0	0	0	0	0	0.0104998	0	0	0	0	0	0	0	0	0	0	0	0	0	0	0	0	0	0	0	0	0	0	0	0	0	0
chr17	28917285	28927063	-	PHF12	1	2	0	0	0	0	0	0	0	0	0	0	0	0	0	0	0	0	0	0	0	0	0	0	0	0	0	0	0	0	0	0	0	0	0	0	0	0	0	0	0	0	0	0	0
chr17	28921688	28924302	-	PHF12	1	7	0	0	0	0	0	0	0	0	0	0	0	0	0	0	0	0	0	0	0	0	0.0105441	0	0	0	0	0	0	0	0	0.0209643	0	0	0	0	0	0	0	0	0	0	0	0	0.015239
chr17	28921688	28927063	-	PHF12	1	18	0	0	0	0	0	0	0.0104492	0	0	0	0	0	0	0.0290444	0	0.013398	0	0	0	0	0	0	0	0	0	0	0.00847806	0	0.0304037	0	0.0102477	0	0	0	0	0	0.0393792	0	0	0	0	0	0
chr17	29082316	29087121	-	MYO18A	1	1	0	0	0	0	0	0	0	0	0	0	0	0	0	0	0	0	0	0	0	0	0	0	0	0	0	0	0	0	0	0	0	0	0	0	0	0.0174408	0	0	0	0	0	0	0
chr17	29103599	29107189	-	MYO18A	1	4	0	0	0	0	0	0.00897101	0	0	0	0	0	0	0	0	0	0	0	0	0	0	0	0	0	0	0	0	0	0	0	0	0	0	0	0	0	0	0	0	0	0	0	0	0
chr17	29285992	29287716	-	NUFIP2	1	28	0	0	0	0	0	0	0	0.0113022	0	0	0	0	0	0	0	0	0	0.0187576	0	0	0.0105441	0	0	0	0	0.0128174	0.0169561	0	0.0304037	0.0104822	0	0	0	0	0.0564602	0	0	0.00773231	0	0.005728	0	0	0
chr17	29451680	29451455	+	TAOK1	1	18	0	0	0	0	0	0	0	0.0113022	0	0	0	0	0	0.0145222	0.0143092	0	0	0	0	0.0177355	0	0	0.0103481	0	0.0143901	0	0	0.0148968	0	0	0.0204954	0	0	0	0	0.0174408	0	0	0	0.005728	0	0	0
chr17	29467216	29451455	+	TAOK1	1	8	0	0	0	0	0	0	0	0	0	0	0	0	0	0	0	0	0	0	0	0	0	0	0	0	0	0.0128174	0	0	0	0	0	0	0	0	0	0	0	0	0	0	0	0.00800603	0
chr17	29475771	29451455	+	TAOK1	1	2	0	0	0	0	0	0	0	0	0	0	0	0	0	0	0	0	0	0	0	0	0	0	0	0	0	0	0	0	0	0	0	0	0	0	0	0	0.0196896	0	0	0	0	0	0
chr10	72196811	72213331	-	ASCC1	1	17	0	0	0	0	0	0	0	0	0	0	0	0.013703	0	0	0	0	0.0104998	0	0	0	0	0	0	0	0	0	0.00847806	0	0	0.0104822	0	0	0	0	0	0.0174408	0	0.00773231	0	0	0.0191802	0.00800603	0
chr17	29478347	29451455	+	TAOK1	1	1	0	0	0	0	0	0	0	0	0	0	0	0	0	0	0	0	0.0104998	0	0	0	0	0	0	0	0	0	0	0	0	0	0	0	0	0	0	0	0	0	0	0	0	0	0
chr17	29482288	29451455	+	TAOK1	1	9	0	0	0	0	0	0.00897101	0	0.0113022	0	0	0	0	0	0	0	0	0	0	0	0	0.0105441	0	0	0	0	0.0128174	0	0	0	0	0	0	0	0	0	0	0	0	0	0.005728	0	0.00800603	0
chr17	29491865	29451455	+	TAOK1	1	2	0	0	0	0	0	0	0.0104492	0	0	0	0	0	0	0	0	0	0	0	0	0	0	0	0	0	0	0	0	0	0	0	0	0	0	0	0	0	0	0	0	0	0	0	0
chr17	29491865	29475670	+	TAOK1	0		0	0	0	0	0	0	0	0	0	0	0	0	0	0	0	0	0	0	0	0	0	0	0	0	0	0	0	0	0	0	0	0	0	0	0	0	0	0	0	0	0	0	0
chr17	29491865	29480368	+	TAOK1	1	9	0	0	0	0	0	0	0	0	0	0	0	0	0.0195497	0	0	0.013398	0	0	0	0.0177355	0	0	0	0	0	0	0	0	0	0	0	0	0	0	0	0	0	0	0	0	0	0	0
chr17	29491865	29482197	+	TAOK1	1	15	0	0	0	0	0	0	0	0	0.0215419	0	0	0.0274061	0	0.0290444	0	0	0	0	0	0	0	0	0	0	0	0	0	0	0	0	0.0102477	0	0	0	0	0	0.0393792	0	0	0	0	0.00800603	0
chr17	29495727	29480368	+	TAOK1	1	5	0	0	0	0.0244509	0	0	0	0	0	0	0	0	0	0	0	0	0	0	0	0	0	0	0	0	0	0	0	0	0	0	0	0	0	0	0	0	0	0.00773231	0	0	0	0	0
chr17	29495727	29482197	+	TAOK1	1	4	0	0	0.0311446	0	0	0	0	0	0	0	0	0	0	0	0	0	0	0	0	0	0	0	0	0	0.0143901	0	0	0	0	0	0	0	0	0	0	0	0	0	0	0	0	0	0
chr17	29498521	29482197	+	TAOK1	1	8	0	0	0	0	0	0	0.0104492	0	0	0	0	0	0	0.0145222	0	0	0	0	0	0	0.0105441	0	0	0.01967	0	0	0	0	0	0	0	0	0	0	0	0	0	0	0	0	0	0	0
chr17	29502723	29482197	+	TAOK1	1	1	0	0	0	0	0	0	0	0	0	0	0	0	0	0	0	0	0	0	0	0	0	0	0	0	0	0	0	0	0	0	0	0	0	0	0	0	0	0	0	0	0	0	0
chr10	7220411	7227937	-	SFMBT2	1	4	0	0	0	0	0	0	0	0	0	0	0	0	0	0	0	0	0.0104998	0	0	0	0	0	0	0	0	0	0	0	0	0	0	0	0	0	0	0	0	0	0	0.005728	0	0	0
chr17	29508132	29451455	+	TAOK1	1	1	0	0	0	0	0	0	0	0	0	0	0	0	0	0	0	0	0	0	0	0	0	0	0	0	0	0	0	0	0	0	0	0	0	0	0	0	0	0	0	0	0	0	0
chr17	29510992	29451455	+	TAOK1	1	1	0	0	0	0	0	0	0	0	0	0	0	0	0	0	0	0	0	0	0	0	0	0	0	0	0	0	0	0	0	0	0	0	0	0	0	0	0	0	0	0	0	0	0
chr17	29510992	29480368	+	TAOK1	1	3	0	0	0	0	0	0	0	0	0	0	0	0	0	0	0	0.013398	0	0	0	0	0	0	0	0.01967	0	0	0	0	0	0	0	0	0	0	0	0	0	0	0	0	0	0	0
chr17	29510992	29482197	+	TAOK1	1	50	0	0.0367461	0	0	0.0251472	0	0.0208984	0.0113022	0	0	0	0	0	0.0290444	0.0286185	0	0	0.00937882	0	0.0177355	0.0105441	0	0	0	0.0143901	0.0256349	0.00847806	0.0148968	0.0152018	0	0	0.0255745	0.0300755	0	0	0	0	0	0.0262614	0.005728	0	0.0160121	0.015239
chr17	29510992	29502589	+	TAOK1	1	3	0	0	0	0	0	0	0	0	0	0	0	0	0	0	0	0	0	0	0	0	0	0	0	0	0	0	0	0	0	0	0	0	0	0	0	0	0	0	0	0.005728	0	0	0
chr17	29517656	29482197	+	TAOK1	1	22	0.0132985	0	0.0155723	0	0	0.00897101	0	0	0	0	0	0	0	0.0145222	0	0	0	0	0	0	0	0	0	0.01967	0	0	0.00847806	0	0	0	0	0	0	0	0	0	0.0196896	0	0	0	0	0	0
chr17	29517656	29510864	+	TAOK1	1	2	0	0	0	0	0	0	0	0	0	0	0	0	0	0	0	0	0.0209997	0	0	0	0	0	0	0	0	0	0	0	0	0	0	0	0	0	0	0	0	0	0	0	0	0	0
chr17	29522519	29451455	+	TAOK1	1	1	0	0	0	0	0	0	0	0	0	0	0	0	0	0	0	0	0	0	0	0	0	0	0	0	0	0	0	0	0	0	0	0	0	0	0	0	0	0	0	0	0	0	0
chr17	29522519	29482197	+	TAOK1	1	2	0	0	0	0	0	0	0	0	0	0	0	0	0	0	0	0	0	0	0	0	0	0	0	0	0	0	0	0	0	0	0	0	0	0	0	0	0	0	0	0	0	0	0
chr17	29534300	29451455	+	TAOK1	1	5	0	0	0	0	0	0	0	0	0.0215419	0	0	0	0	0	0	0	0	0	0	0	0.0105441	0	0	0	0	0	0	0	0	0	0	0	0	0	0	0	0	0	0	0	0	0	0
chr10	105211250	105167258	+	SORCS3	1	9	0	0	0	0	0	0	0	0	0	0	0	0.013703	0	0.0145222	0	0	0	0	0	0	0	0	0	0	0	0	0	0	0	0	0	0	0	0	0	0	0	0	0	0	0	0	0
chr10	7220411	7248649	-	SFMBT2	1	1	0.0132985	0	0	0	0	0	0	0	0	0	0	0	0	0	0	0	0	0	0	0	0	0	0	0	0	0	0	0	0	0	0	0	0	0	0	0	0	0	0	0	0	0	0
chr17	29534300	29482197	+	TAOK1	1	1	0	0	0	0	0	0	0	0	0	0	0	0	0	0	0	0	0	0	0	0	0	0	0	0	0	0	0	0	0	0	0	0	0	0	0	0	0	0	0	0	0	0	0
chr17	29534300	29517453	+	TAOK1	1	1	0	0	0	0	0	0	0	0	0	0	0	0	0	0	0	0	0	0	0	0	0	0	0	0	0	0	0	0	0	0.0104822	0	0	0	0	0	0	0	0	0	0	0	0	0
chr17	29648144	29650800	-	SSH2	1	2	0	0	0	0	0	0	0	0	0	0	0	0	0	0.0145222	0	0	0	0	0	0	0	0	0	0	0.0143901	0	0	0	0	0	0	0	0	0	0	0	0	0	0	0	0	0	0
chr17	29648144	29655607	-	SSH2	1	6	0	0	0.0155723	0	0	0	0	0	0	0	0	0.013703	0.0195497	0	0	0	0	0	0	0	0	0	0	0	0	0	0	0	0	0	0	0	0	0	0	0	0	0	0	0	0	0	0
chr17	29648144	29667223	-	SSH2	1	5	0	0	0.0155723	0	0	0	0	0	0	0	0	0	0	0	0	0	0	0	0	0	0	0	0	0	0	0	0	0	0	0	0	0	0	0	0	0	0	0	0	0	0	0.00800603	0
chr17	29648144	29672129	-	SSH2	1	24	0	0	0	0	0	0	0	0	0	0	0	0	0	0.0145222	0	0	0.0104998	0	0	0	0.0210882	0	0	0.01967	0	0.0128174	0.0169561	0	0	0	0	0	0	0	0	0	0	0	0	0.011456	0	0	0
chr17	29655561	29703062	-	SSH2	1	1	0	0	0	0	0	0	0	0	0	0	0	0	0	0	0	0	0.0104998	0	0	0	0	0	0	0	0	0	0	0	0	0	0	0	0	0	0	0	0	0	0	0	0	0	0
chr17	29666867	29684684	-	SSH2	1	1	0	0	0	0	0	0	0	0	0	0	0	0	0	0	0	0	0	0	0	0	0	0	0	0	0	0	0	0	0	0	0	0	0	0	0	0	0	0	0	0	0	0	0
chr17	29666867	29695523	-	SSH2	1	3	0	0	0	0	0	0	0	0	0	0	0	0	0	0	0	0	0	0	0	0	0	0	0	0	0	0	0	0	0	0	0	0	0	0	0	0	0	0	0	0	0	0	0
chr17	29666867	29703062	-	SSH2	1	3	0	0	0	0	0	0	0	0	0	0	0	0	0	0	0	0	0	0	0	0	0	0	0	0	0	0	0	0	0	0	0	0	0	0.0197506	0	0	0	0	0	0	0	0	0
chr10	7220411	7276989	-	SFMBT2	1	5	0	0	0.0155723	0	0	0	0	0	0	0	0	0	0	0	0	0	0	0	0	0.0177355	0	0	0	0	0	0	0	0	0	0	0	0	0	0	0	0	0	0	0	0	0	0	0
chr17	29676820	29684684	-	SSH2	1	8	0	0	0	0	0	0	0	0	0	0	0	0	0	0	0	0	0	0	0	0	0	0	0	0	0	0	0	0	0	0	0	0	0	0	0.0282301	0	0	0	0	0	0	0.0160121	0
chr17	29676820	29695523	-	SSH2	1	11	0	0	0	0	0	0	0	0	0	0	0	0	0	0	0	0	0	0.00937882	0	0	0.0105441	0	0.0103481	0	0	0	0	0	0	0	0	0	0	0	0	0.0174408	0	0	0	0.005728	0	0	0
chr17	29676820	29703062	-	SSH2	1	16	0	0	0	0	0.0251472	0	0	0	0	0	0	0	0	0	0.0286185	0	0	0	0	0	0	0	0	0	0	0	0	0	0	0	0	0	0	0.0197506	0	0	0	0	0	0	0	0	0
chr17	29684563	29703062	-	SSH2	1	54	0.0132985	0.018373	0.0155723	0	0	0.026913	0.0208984	0	0	0.0162073	0	0.0274061	0.0195497	0.0435666	0.0286185	0	0.0104998	0.0187576	0	0	0.0210882	0	0	0	0.0143901	0	0.0508683	0.0148968	0	0	0.0102477	0	0	0.0395013	0.0564602	0	0	0.0154646	0	0.017184	0	0.00800603	0.015239
chr17	29695459	29703062	-	SSH2	1	1	0	0	0	0	0	0	0	0	0	0	0	0	0	0	0	0	0	0	0	0	0	0	0	0	0	0	0.00847806	0	0	0	0	0	0	0	0	0	0	0	0	0	0	0	0
chr17	2998376	2963430	+	RAP1GAP2	1	2	0	0	0	0	0	0	0	0	0	0	0	0	0	0	0	0	0	0	0	0	0	0	0	0	0.0143901	0	0	0	0	0	0	0	0	0	0	0	0	0	0	0	0	0	0
chr17	2998376	2991297	+	RAP1GAP2	1	1	0	0	0	0	0	0	0	0	0	0	0	0	0	0	0	0	0.0104998	0	0	0	0	0	0	0	0	0	0	0	0	0	0	0	0	0	0	0	0	0	0	0	0	0	0
chr17	30054148	30051118	+	EFCAB5	1	1	0	0	0	0	0	0	0	0	0	0	0	0	0	0	0	0	0	0	0	0	0	0	0	0	0	0	0	0	0	0	0	0	0	0	0	0	0	0	0	0	0	0	0
chr17	3020595	2991297	+	RAP1GAP2	1	2	0	0	0	0	0	0	0	0	0	0	0	0	0	0	0	0	0	0	0	0	0	0	0	0	0	0	0	0	0	0	0	0	0	0	0	0	0	0	0	0.005728	0	0	0
chr17	30266885	30286902	-	BLMH	1	17	0	0	0	0	0	0	0	0	0	0	0	0	0	0.0145222	0	0	0	0.00937882	0	0	0.0105441	0	0.0103481	0	0	0	0	0	0	0	0	0	0	0	0	0	0	0.00773231	0.0131307	0.017184	0	0	0
chr10	7220411	7285954	-	SFMBT2	1	58	0	0	0	0	0	0.017942	0	0.0113022	0.0215419	0	0	0	0.0195497	0.0290444	0	0.053592	0.0104998	0.00937882	0.0415416	0	0.0316324	0	0	0.01967	0.0143901	0.0256349	0	0	0	0.0209643	0.0204954	0	0	0	0	0.0697634	0	0	0.0131307	0.005728	0.0191802	0.0240181	0
chr17	30451846	30449553	+	CPD	1	2	0	0	0	0	0	0	0	0	0	0	0	0	0	0	0	0	0	0	0	0	0	0	0	0	0	0	0	0	0	0	0	0	0	0	0	0	0	0	0	0	0	0.00800603	0
chr17	30456526	30451711	+	CPD	1	2	0	0	0	0	0	0	0.0104492	0	0	0	0	0	0	0	0	0	0	0	0	0	0	0	0	0	0	0	0	0	0	0	0	0	0	0	0	0	0	0	0	0	0	0	0
chr17	30484770	30481143	+	GOSR1	1	2	0	0	0	0	0	0	0	0	0	0	0	0	0	0	0	0	0	0	0	0	0	0	0	0	0	0	0	0	0.0152018	0	0	0	0	0	0	0	0	0	0	0	0	0	0
chr17	30490217	30481143	+	GOSR1	1	9	0	0	0	0	0	0	0	0	0	0	0	0	0	0	0	0	0	0.00937882	0	0	0	0	0	0	0	0.0128174	0	0	0	0	0	0	0	0	0	0	0	0	0	0.005728	0	0	0
chr17	30492753	30481143	+	GOSR1	1	7	0	0	0.0155723	0	0	0	0	0	0	0	0	0	0	0	0	0	0	0	0	0	0	0	0	0	0	0	0	0	0	0	0	0.0127873	0	0	0	0	0	0	0	0	0	0	0
chr17	30492753	30484214	+	GOSR1	1	22	0	0	0	0	0.0251472	0	0	0	0	0	0	0	0	0	0	0	0	0	0	0	0	0	0.0103481	0.0393401	0	0	0	0	0.0152018	0	0	0	0.0300755	0	0	0	0	0	0	0.011456	0	0	0
chr17	30510909	30481143	+	GOSR1	1	3	0	0	0	0	0	0	0.0104492	0	0	0	0	0	0	0	0	0	0	0	0	0	0	0	0	0	0	0	0	0	0	0	0	0	0	0	0	0	0	0	0	0	0	0	0
chr17	30510909	30484214	+	GOSR1	1	5	0	0	0	0	0	0	0	0	0	0	0	0	0.0195497	0	0	0.013398	0	0	0	0	0	0	0	0	0	0	0	0	0	0	0	0	0	0	0	0	0	0	0	0	0	0	0
chr17	30520021	30484214	+	GOSR1	1	34	0	0	0	0	0	0.00897101	0	0.0113022	0	0	0	0.013703	0	0.0145222	0	0	0	0	0.0207708	0.0177355	0.0316324	0	0	0	0	0.0384523	0	0	0	0.0104822	0	0.0383618	0	0.0197506	0	0	0.0196896	0.00773231	0.0131307	0.011456	0	0	0.015239
chr17	30759539	30734897	+	SUZ12P1	1	7	0	0	0	0.0489018	0	0	0	0	0	0	0	0.013703	0	0	0	0	0.0314995	0	0	0	0	0	0	0	0	0	0	0	0	0	0	0	0	0	0	0	0.0393792	0	0	0	0	0	0
chr10	72230440	72223888	+	ANAPC16	1	5	0	0	0	0	0	0	0	0	0	0	0	0	0	0	0	0	0.0104998	0	0	0	0.0105441	0	0	0	0	0	0	0	0.0152018	0	0	0	0	0	0	0	0.0393792	0	0	0	0	0	0
chr17	30766588	30734897	+	SUZ12P1	1	4	0	0	0	0	0	0	0	0	0	0	0	0	0	0	0	0	0	0	0	0	0	0	0	0	0	0	0	0	0	0	0	0	0	0	0	0	0	0	0	0	0	0	0
chr17	30769064	30734897	+	SUZ12P1	1	1	0	0	0	0	0	0	0	0	0	0	0	0	0	0	0	0	0	0	0	0	0	0	0	0	0	0	0	0	0	0	0	0	0	0	0	0.0174408	0	0	0	0	0	0	0
chr17	30785919	30796337	-	CRLF3	1	2	0	0	0	0	0	0	0	0	0	0	0	0	0	0	0	0	0	0	0	0	0	0	0.0103481	0	0	0	0	0	0	0	0	0	0	0	0	0	0	0	0	0	0	0	0
chr17	30792440	30793672	-	CRLF3	1	1	0	0	0	0	0	0	0	0	0	0	0	0	0	0	0	0	0	0	0	0	0	0	0	0	0	0	0	0	0	0	0	0	0	0	0	0	0	0	0	0	0	0	0
chr17	30792440	30804108	-	CRLF3	1	7	0	0	0	0	0	0	0	0	0	0	0	0	0	0.0145222	0	0	0	0	0	0	0	0	0	0	0	0	0	0	0	0	0	0.0255745	0	0	0	0	0	0	0	0.005728	0	0	0
chr17	30793450	30804108	-	CRLF3	1	2	0	0	0	0	0	0	0	0	0	0	0	0	0	0	0	0	0	0	0	0	0	0	0	0	0	0	0	0	0	0	0	0	0	0	0	0	0	0	0	0	0	0	0
chr17	31163376	31155983	+	NF1	1	18	0	0	0	0	0	0	0	0	0	0	0	0	0	0	0	0.013398	0.0104998	0.0187576	0	0	0	0	0	0	0	0	0	0	0	0	0	0	0	0	0	0	0	0.00773231	0	0.005728	0.0191802	0	0.015239
chr17	31169997	31155983	+	NF1	1	42	0.0132985	0.018373	0.0155723	0.0244509	0	0.00897101	0	0	0	0	0	0.013703	0	0.0145222	0.0143092	0	0	0	0.0207708	0.0177355	0.0105441	0	0.0310443	0	0	0	0	0	0.0304037	0	0.0102477	0.0127873	0	0	0	0.0348817	0.0196896	0.00773231	0	0.011456	0	0.0160121	0
chr17	31182665	31155983	+	NF1	1	45	0	0	0	0.0244509	0	0.017942	0	0.0113022	0	0	0.0225478	0	0	0.0145222	0	0	0	0.00937882	0.0207708	0	0.0105441	0	0	0	0	0.0256349	0.00847806	0	0.0152018	0	0.0102477	0	0	0.0790026	0	0	0.0393792	0.0231969	0	0.011456	0	0.00800603	0.015239
chr17	31182665	31181422	+	NF1	1	1	0	0	0	0	0	0	0	0	0	0	0	0	0	0	0	0	0	0	0	0	0.0105441	0	0	0	0	0	0	0	0	0	0	0	0	0	0	0	0	0	0	0	0	0	0
chr10	7227855	7285954	-	SFMBT2	1	5	0	0	0	0	0	0	0	0	0	0	0	0	0	0	0	0	0	0	0	0	0	0	0	0	0	0	0	0	0	0	0.0102477	0	0	0	0	0	0	0	0	0	0	0.00800603	0
chr17	31206371	31155983	+	NF1	1	9	0	0	0	0	0	0	0	0	0	0	0	0	0	0	0	0	0	0	0	0	0	0.0177926	0	0	0	0	0	0	0.0152018	0	0	0	0	0	0	0	0	0	0	0	0	0.00800603	0
chr17	31206371	31181422	+	NF1	1	30	0	0	0	0	0	0	0	0.0113022	0	0	0	0	0	0	0.0143092	0	0	0	0	0	0.0105441	0	0	0	0.0143901	0.0384523	0	0	0	0.0314465	0	0.0383618	0	0	0	0	0.0393792	0.0154646	0	0	0	0.00800603	0
chr17	31214585	31181422	+	NF1	1	1	0	0	0	0	0	0	0	0	0	0	0	0	0.0195497	0	0	0	0	0	0	0	0	0	0	0	0	0	0	0	0	0	0	0	0	0	0	0	0	0	0	0	0	0	0
chr17	31214585	31200422	+	NF1	1	4	0	0	0	0	0	0	0	0	0	0	0	0	0	0	0	0	0	0.0187576	0	0	0	0	0	0	0	0	0	0	0	0	0	0	0	0	0	0	0	0	0	0	0	0	0
chr17	31219118	31155983	+	NF1	1	3	0	0	0	0	0	0	0	0	0	0	0	0	0	0	0	0	0	0	0	0	0	0	0	0	0	0	0	0	0	0	0	0	0	0	0	0	0.0196896	0	0	0	0	0	0
chr17	31219118	31163186	+	NF1	1	3	0	0	0	0	0	0	0	0	0	0	0	0	0	0	0	0	0	0	0	0	0	0	0	0	0	0	0	0	0	0	0	0	0	0	0	0	0	0	0	0.005728	0	0.00800603	0
chr17	31219118	31181422	+	NF1	1	3	0	0	0	0	0	0	0	0	0	0	0	0	0	0	0	0	0	0	0	0	0	0	0	0	0	0	0	0	0	0	0	0	0	0	0	0	0	0	0	0	0	0	0
chr17	31219118	31200422	+	NF1	1	7	0	0	0	0	0	0	0	0	0	0	0	0.013703	0	0	0	0	0	0	0	0	0	0	0	0	0	0	0	0	0	0	0	0	0.0300755	0	0	0	0	0	0	0	0	0	0
chr17	31219118	31206240	+	NF1	1	4	0	0	0	0	0	0	0	0	0	0	0	0	0	0	0	0	0	0	0	0	0	0	0	0	0	0.0128174	0	0	0	0	0	0	0	0	0	0	0	0	0	0	0	0	0
chr17	31227606	31223444	+	NF1	1	41	0	0.018373	0	0	0.0502943	0.00897101	0	0	0.0861677	0	0.0225478	0	0	0	0	0.026796	0	0.0281364	0.0207708	0	0	0	0	0	0.0287802	0	0.0508683	0.0148968	0	0.0209643	0.0307431	0.051149	0	0	0	0.104645	0	0	0.0525228	0	0	0.0400301	0
chr10	72340789	72341170	-	DNAJB12	1	100	0.0398956	0	0.0467169	0	0.0251472	0.0358841	0.0417969	0.10172	0.0430839	0.0324146	0.0225478	0.0822183	0.058649	0.116178	0.057237	0.0803879	0.0944986	0.0281364	0.0415416	0.0709419	0.084353	0.0355851	0.0413924	0.0393401	0.0287802	0.0769046	0.0847806	0.104278	0.0152018	0.0943395	0.0307431	0.051149	0	0	0	0.0872042	0.098448	0.0231969	0.0656535	0.051552	0	0.0320241	0
chr17	31265339	31200422	+	NF1	1	2	0	0	0	0	0	0	0	0	0	0	0	0	0	0	0	0	0	0	0	0	0	0	0	0	0	0	0	0	0	0	0	0	0	0.0197506	0	0	0	0	0	0	0	0	0
chr17	31265339	31248984	+	NF1	1	14	0	0	0	0	0	0	0	0	0.0430839	0	0	0	0	0	0	0	0	0	0	0	0	0	0	0	0.0143901	0	0	0	0	0	0	0	0	0	0	0	0	0	0	0	0	0	0
chr17	31265339	31252938	+	NF1	1	1	0	0	0	0	0	0	0	0	0	0	0	0	0	0	0	0	0	0	0	0	0	0	0	0	0	0	0	0	0	0	0	0	0	0	0	0	0	0	0	0	0	0	0
chr17	31326252	31325820	+	NF1	1	3	0	0	0	0	0	0	0	0	0	0	0	0	0	0	0	0	0	0	0	0	0	0	0	0	0	0.0128174	0	0	0	0	0	0	0	0	0	0	0	0	0	0	0	0	0
chr17	31330498	31325820	+	NF1	1	1	0	0	0	0	0	0	0	0	0	0	0	0	0	0	0	0	0	0	0	0	0	0	0	0	0	0	0	0	0	0	0	0	0	0	0	0	0	0	0	0	0	0	0
chr17	31517877	31509077	+	RAB11FIP4	1	1	0	0	0	0	0	0	0	0	0	0	0	0	0	0	0	0	0	0	0	0	0	0	0	0	0	0	0	0.0148968	0	0	0	0	0	0	0	0	0	0	0	0	0	0	0
chr17	31517877	31517651	+	RAB11FIP4	1	39	0	0	0	0	0	0	0	0.0113022	0	0	0	0	0	0	0	0	0.0104998	0.0187576	0.0207708	0	0	0	0	0	0	0	0.0254342	0.0446905	0	0.0104822	0.0102477	0.0127873	0	0	0	0	0	0.00773231	0.0131307	0.011456	0	0.00800603	0
chr17	31525230	31517651	+	RAB11FIP4	1	1	0	0	0	0	0	0	0	0	0	0	0	0	0	0	0	0	0	0	0	0	0	0	0	0	0	0	0	0.0148968	0	0	0	0	0	0	0	0	0	0	0	0	0	0	0
chr17	31525230	31525090	+	RAB11FIP4	1	3	0	0	0	0	0	0	0	0	0	0	0	0	0	0	0	0	0	0	0	0	0	0	0	0	0	0	0	0	0	0	0	0	0	0	0	0	0	0	0	0.005728	0	0	0
chr17	31528778	31527842	+	RAB11FIP4	1	3	0	0	0	0	0	0	0	0	0	0	0	0.013703	0	0	0	0	0	0	0	0	0	0	0	0	0	0	0	0	0.0152018	0	0	0	0	0	0	0	0	0	0	0	0	0	0
chr10	72407929	72508269	-	MICU1	1	1	0	0	0	0	0	0	0	0	0	0	0	0	0	0	0	0	0	0	0	0	0	0	0	0	0	0	0	0	0	0	0	0	0	0	0	0	0	0	0	0	0	0	0
chr17	31880573	31887313	-	UTP6	1	2	0	0	0	0	0	0	0	0	0	0	0	0	0	0	0	0	0	0	0	0	0	0	0	0	0	0	0	0	0	0	0	0.0127873	0	0	0	0	0.0196896	0	0	0	0	0	0
chr17	31880573	31895011	-	UTP6	1	1	0	0	0	0	0	0	0	0	0	0	0	0	0	0.0145222	0	0	0	0	0	0	0	0	0	0	0	0	0	0	0	0	0	0	0	0	0	0	0	0	0	0	0	0	0
chr17	31884424	31887313	-	UTP6	1	1	0	0	0	0	0	0	0	0	0	0	0	0	0	0	0	0	0	0	0	0	0	0	0	0	0	0	0	0	0	0	0	0	0	0	0	0	0	0.00773231	0	0	0	0	0
chr17	31884424	31892794	-	UTP6	1	2	0	0	0	0	0	0	0	0	0	0	0	0	0	0	0	0	0	0	0	0	0	0	0	0	0	0	0	0	0	0	0	0	0	0	0	0	0	0	0	0	0	0.00800603	0
chr17	31966196	31940286	+	SUZ12	1	28	0.0132985	0	0	0	0	0.026913	0	0	0	0	0	0	0.0195497	0	0	0	0	0	0	0.0177355	0.0316324	0	0.0206962	0	0.0143901	0.0128174	0	0	0	0	0	0	0	0	0.0282301	0	0	0	0.0262614	0.011456	0	0.0240181	0
chr17	31973231	31940286	+	SUZ12	1	51	0	0	0.0311446	0.146705	0.100589	0	0.0626953	0	0.0430839	0	0	0	0	0.116178	0	0	0.0524992	0	0	0	0	0.0711703	0	0.0786801	0	0	0.0932586	0.193659	0.091211	0	0	0	0	0	0	0.174408	0.118138	0	0	0	0	0	0
chr17	31988497	31940286	+	SUZ12	1	8	0	0	0	0	0	0	0	0	0	0.0324146	0	0	0	0	0	0	0	0	0	0	0	0	0	0	0	0	0	0	0	0	0	0	0	0	0	0	0	0.00773231	0	0.005728	0	0.00800603	0
chr17	31988497	31947617	+	SUZ12	1	5	0	0	0	0	0	0	0	0	0	0	0	0	0	0	0	0	0	0	0	0	0	0	0	0	0	0	0	0	0	0	0	0	0	0	0	0	0	0	0	0.005728	0	0	0
chr17	31988497	31966147	+	SUZ12	1	3	0	0	0	0	0	0	0	0	0	0	0	0	0	0	0	0	0	0	0	0	0	0	0	0	0	0	0	0	0	0	0	0	0	0	0	0	0	0	0	0	0	0	0
chr17	31988497	31975482	+	SUZ12	1	1	0	0	0	0	0	0	0	0	0	0	0	0	0	0.0145222	0	0	0	0	0	0	0	0	0	0	0	0	0	0	0	0	0	0	0	0	0	0	0	0	0	0	0	0	0
chr10	7243558	7276989	-	SFMBT2	1	1	0	0	0	0	0	0	0	0	0	0	0	0	0	0	0	0	0	0	0	0	0	0	0	0	0	0	0	0	0	0	0	0	0	0	0	0	0	0	0	0	0	0	0
chr17	31988497	31982999	+	SUZ12	1	59	0	0	0	0.0244509	0.0502943	0	0	0	0.0646258	0	0.0450957	0.0411091	0	0.0290444	0.0429277	0.013398	0.0524992	0	0.0207708	0.0177355	0.0527206	0	0.0310443	0	0	0	0	0.0297937	0	0.0104822	0.0204954	0	0	0	0	0	0.0196896	0	0.0262614	0.02864	0	0	0
chr17	31988497	31988320	+	SUZ12	1	13	0	0	0.0155723	0	0	0	0.0208984	0	0	0	0	0	0	0	0	0	0	0.0187576	0	0	0	0	0	0	0.0431703	0	0	0	0	0	0	0	0	0	0	0	0	0	0	0	0	0	0
chr17	31993333	31940286	+	SUZ12	1	2	0	0	0	0	0	0.00897101	0	0	0	0	0	0	0	0	0	0	0	0	0	0	0	0	0	0	0	0	0	0	0	0	0	0	0	0	0	0	0.0196896	0	0	0	0	0	0
chr17	31994721	31993865	+	SUZ12	1	4	0	0	0	0	0	0	0	0	0	0	0	0	0	0	0	0	0	0.00937882	0	0	0	0	0	0	0	0.0128174	0	0	0	0	0	0	0	0	0	0	0	0	0	0	0	0	0
chr17	31995762	31940286	+	SUZ12	1	1	0	0	0	0	0	0	0	0	0	0	0	0	0	0	0	0	0	0	0	0	0	0	0	0	0.0143901	0	0	0	0	0	0	0	0	0	0	0	0	0	0	0	0	0	0
chr17	31995762	31993865	+	SUZ12	1	3	0	0	0	0	0	0	0	0	0	0	0	0	0	0	0	0	0	0	0	0	0	0	0	0	0	0	0	0.0148968	0	0	0	0	0	0	0	0	0	0	0	0	0	0	0
chr17	31996877	31940286	+	SUZ12	1	6	0	0	0	0	0.0251472	0	0	0	0	0	0	0	0	0	0	0	0	0	0	0	0	0	0	0	0	0	0	0	0	0	0	0	0	0	0.0282301	0	0	0	0	0	0	0	0
chr17	31996877	31988320	+	SUZ12	1	1	0	0	0	0	0	0	0	0	0	0	0	0	0	0	0	0	0	0	0	0	0	0	0	0	0	0	0	0	0	0.0104822	0	0	0	0	0	0	0	0	0	0	0	0	0
chr17	31996877	31993865	+	SUZ12	1	2	0	0	0	0	0	0	0	0	0	0	0	0	0	0.0145222	0	0	0	0	0	0	0	0.0177926	0	0	0	0	0	0	0	0	0	0	0	0	0	0	0	0	0	0	0	0	0
chr17	32176213	32171043	+	RHOT1	1	1	0	0	0	0	0	0	0	0	0	0	0	0	0	0	0	0	0	0	0	0	0	0	0	0	0	0	0	0	0	0	0	0	0	0	0	0	0	0	0	0	0	0	0
chr10	7243558	7285954	-	SFMBT2	1	122	0.0265971	0.018373	0.0311446	0	0.0251472	0.0717681	0.104492	0.0226044	0.0861677	0.0648291	0.0676435	0.013703	0.058649	0.145222	0.100165	0.147378	0.157498	0.0844093	0.0623124	0.0709419	0.189794	0.0711703	0.0310443	0.0786801	0.0431703	0.089722	0.0593464	0.178762	0.0456055	0.0524108	0.0512386	0.0639363	0.0601511	0.0395013	0.16938	0.0174408	0.098448	0.0541262	0.0656535	0.05728	0.0191802	0	0.030478
chr17	32176213	32173831	+	RHOT1	1	1	0	0	0	0	0	0	0	0.0113022	0	0	0	0	0	0	0	0	0	0	0	0	0	0	0	0	0	0	0	0	0	0	0	0	0	0	0	0	0	0	0	0	0	0	0
chr17	32183272	32171043	+	RHOT1	1	34	0	0	0	0	0	0.00897101	0	0	0	0.0324146	0	0.013703	0	0.0435666	0.0286185	0.026796	0	0.00937882	0	0.0177355	0.0316324	0	0	0	0	0.0384523	0.0169561	0	0	0	0	0	0	0	0	0	0	0	0	0.011456	0.0191802	0.0240181	0
chr17	32194107	32171043	+	RHOT1	1	3	0	0	0	0	0	0	0	0	0	0	0	0	0	0	0	0	0	0	0	0	0	0	0	0	0	0	0	0	0	0	0	0	0	0	0	0	0	0	0	0.011456	0	0	0
chr17	32194107	32173831	+	RHOT1	1	14	0	0	0	0	0	0	0	0	0	0	0	0	0.0390993	0.0290444	0	0	0	0	0	0	0	0	0.0103481	0	0	0.0256349	0.00847806	0	0	0	0	0	0	0	0	0.0174408	0	0	0	0.005728	0	0	0
chr17	32202900	32200956	+	RHOT1	1	6	0	0	0	0	0	0	0	0	0	0	0	0	0	0	0	0	0	0	0	0	0	0	0	0	0.0143901	0	0	0	0	0	0	0	0	0	0	0	0	0	0	0.011456	0	0	0.015239
chr17	32203973	32200956	+	RHOT1	1	3	0	0	0	0	0	0	0	0	0	0	0	0	0	0	0	0	0	0	0	0	0	0	0	0	0	0.0128174	0	0	0	0	0	0	0	0	0	0	0	0	0	0	0	0	0
chr17	32203973	32202770	+	RHOT1	1	2	0	0	0	0	0	0	0	0	0	0	0	0	0	0	0	0	0	0	0	0	0	0	0	0	0	0	0	0	0	0	0	0	0	0	0	0	0	0	0	0.005728	0	0	0
chr17	32208309	32182757	+	RHOT1	1	1	0	0	0	0	0	0	0	0	0	0	0	0	0	0.0145222	0	0	0	0	0	0	0	0	0	0	0	0	0	0	0	0	0	0	0	0	0	0	0	0	0	0	0	0	0
chr17	32305441	32288792	+	RHBDL3	1	1	0	0	0	0	0	0	0	0.0113022	0	0	0	0	0	0	0	0	0	0	0	0	0	0	0	0	0	0	0	0	0	0	0	0	0	0	0	0	0	0	0	0	0	0	0
chr17	32305441	32294294	+	RHBDL3	1	4	0	0	0	0	0	0.00897101	0	0	0	0	0	0	0	0	0	0	0	0	0	0	0	0	0	0	0	0	0	0	0	0	0	0	0	0	0	0	0	0	0	0	0	0	0
chr10	7243558	7381949	-	SFMBT2	1	3	0	0	0	0	0	0	0	0	0	0	0	0	0	0	0	0	0	0	0	0	0	0	0	0	0	0	0	0	0	0	0	0	0	0	0	0	0.0196896	0	0	0	0	0	0
chr17	32305441	32294345	+	RHBDL3	1	1	0	0	0	0	0	0	0	0	0	0	0	0	0	0	0	0	0	0	0	0	0	0	0	0	0	0	0	0	0	0	0	0	0	0	0	0	0	0	0	0	0	0	0
chr17	32316292	32288792	+	RHBDL3	1	7	0	0	0	0	0	0.00897101	0	0	0	0	0	0	0	0.0145222	0	0	0	0	0	0	0	0	0	0	0	0	0	0	0	0	0	0	0	0	0	0	0	0	0	0	0	0	0
chr17	32316292	32294294	+	RHBDL3	1	3	0	0	0	0	0.0251472	0	0	0	0	0	0	0	0	0	0	0	0	0	0	0	0	0	0	0	0	0	0	0	0	0	0	0	0	0	0	0	0	0	0	0	0	0	0
chr17	32333417	32338351	-	C17orf75	1	1	0	0	0	0	0	0	0	0	0	0	0	0	0	0	0	0	0	0	0	0	0	0	0	0	0	0	0	0	0	0	0	0	0	0	0	0	0	0	0	0	0	0	0
chr17	32368014	32362914	+	ZNF207	1	5	0	0	0	0	0	0	0	0	0.0215419	0	0	0	0	0	0.0143092	0	0	0	0	0	0.0105441	0	0	0	0	0	0	0	0	0	0	0	0	0	0	0	0	0	0	0	0	0.00800603	0
chr17	32605087	32659338	-	MYO1D	1	1	0	0	0	0	0	0	0	0	0	0	0.0225478	0	0	0	0	0	0	0	0	0	0	0	0	0	0	0	0	0	0	0	0	0	0	0	0	0	0	0	0	0	0	0	0
chr17	32605087	32755662	-	MYO1D	1	8	0	0	0	0	0	0	0	0.0113022	0	0	0	0	0	0	0	0	0	0	0	0	0.0105441	0	0.0103481	0	0	0	0	0	0	0	0	0	0	0	0	0	0	0	0	0	0	0.00800603	0
chr17	32638722	32755662	-	MYO1D	1	4	0	0	0	0	0	0	0	0	0	0	0	0	0	0	0	0	0	0	0	0	0	0	0	0	0	0	0	0	0	0	0	0	0	0.0197506	0	0	0	0	0	0	0	0	0
chr17	32711988	32738385	-	MYO1D	1	3	0	0	0	0	0	0	0	0	0	0	0	0	0	0	0	0	0	0.00937882	0	0	0	0	0	0	0	0.0256349	0	0	0	0	0	0	0	0	0	0	0	0	0	0	0	0	0
chr17	32711988	32749006	-	MYO1D	1	14	0	0	0	0	0	0.00897101	0	0.0113022	0	0	0	0	0.0195497	0	0	0	0	0	0	0	0	0	0	0	0	0	0	0	0	0	0	0	0	0	0	0	0.0196896	0	0	0	0	0	0
chr10	105211250	105178066	+	SORCS3	1	7	0	0	0	0	0	0	0.0104492	0	0	0	0	0	0	0	0	0	0	0	0	0	0	0	0	0	0	0	0.00847806	0	0	0	0	0.0127873	0	0	0	0	0	0	0	0	0	0	0
chr10	7248548	7285954	-	SFMBT2	1	16	0	0	0	0.0244509	0	0	0	0	0	0	0.0450957	0	0	0	0	0	0	0	0	0	0	0	0	0	0	0	0	0	0	0	0	0	0	0	0	0	0	0	0	0	0	0	0
chr17	32711988	32755662	-	MYO1D	1	22	0	0	0	0	0	0	0	0	0	0	0	0	0	0	0	0	0	0	0.0207708	0	0	0	0	0	0	0	0	0	0	0	0.0102477	0.0255745	0	0	0	0	0.0393792	0.00773231	0	0.005728	0	0.00800603	0
chr17	32711988	32772842	-	MYO1D	1	6	0.0132985	0	0	0	0	0	0	0	0	0	0	0	0	0	0	0	0	0	0	0	0	0	0	0	0	0	0	0	0	0	0	0	0	0	0	0	0.0393792	0	0	0.017184	0	0	0
chr17	32738253	32749006	-	MYO1D	1	4	0	0	0	0	0	0	0	0	0	0	0	0	0	0	0	0	0	0	0	0	0	0	0	0	0	0	0.00847806	0	0	0	0	0	0	0	0	0	0	0	0	0	0	0	0
chr17	32748936	32776029	-	MYO1D	1	1	0	0	0	0	0	0	0	0	0	0	0	0	0	0	0	0	0	0	0	0	0	0	0	0	0	0	0.00847806	0	0	0	0	0	0	0	0	0	0	0	0	0	0	0	0
chr17	33088863	33112067	-	ASIC2	1	86	0.0265971	0.018373	0.0155723	0.0489018	0.0251472	0.026913	0	0.0339066	0	0	0.0225478	0.013703	0	0.0580888	0	0.013398	0	0.0187576	0	0	0.0421765	0	0.0206962	0.0393401	0	0	0	0.0297937	0.0152018	0.0314465	0.0409908	0.0639363	0	0	0	0.0174408	0.0196896	0.0154646	0.0131307	0.02864	0	0	0.015239
chr17	33111917	33112067	-	ASIC2	1	1	0	0	0	0	0	0	0	0	0	0	0	0	0	0	0	0	0	0	0	0	0	0	0	0	0	0	0	0	0	0	0	0	0	0	0	0	0	0	0	0	0	0.00800603	0
chr17	3446472	3469398	-	SPATA22	1	1	0	0	0	0	0	0	0	0	0	0	0	0	0	0	0	0	0	0	0	0	0	0	0	0	0.0143901	0	0	0	0	0	0	0	0	0	0	0	0	0	0	0	0	0	0
chr17	34928962	34942906	-	CCT6B	1	1	0	0	0	0	0	0	0	0	0	0	0	0	0	0	0	0	0	0	0	0	0	0.0177926	0	0	0	0	0	0	0	0	0	0	0	0	0	0	0	0	0	0	0	0	0
chr17	34942484	34958694	-	CCT6B	1	7	0	0	0	0	0	0	0.0104492	0	0	0	0	0	0	0	0	0.013398	0	0	0	0	0	0	0.0103481	0	0	0	0	0	0	0	0	0.0127873	0	0.0197506	0	0	0	0	0	0	0	0.00800603	0
chr17	34983552	34983002	+	LIG3	1	2	0	0	0	0	0	0.00897101	0	0	0	0	0	0	0	0	0	0	0	0	0	0	0	0	0	0	0	0	0	0	0	0	0	0	0	0	0	0	0	0	0	0	0	0	0
chr10	7248548	7381949	-	SFMBT2	1	2	0	0	0	0	0	0	0	0	0	0.0162073	0	0	0	0	0	0	0	0	0	0	0	0	0	0	0	0	0	0	0	0	0	0	0	0	0	0	0	0	0	0	0	0	0
chr17	34986131	34983002	+	LIG3	1	18	0	0	0	0	0	0	0	0	0.0215419	0	0	0	0	0.0145222	0	0	0.0104998	0	0	0	0	0	0.0103481	0	0	0.0128174	0	0	0.0152018	0	0.0102477	0	0	0	0	0	0	0	0	0	0	0	0
chr17	35101201	35103544	-	RAD51D,AC004223.3	1	1	0	0	0	0	0	0	0	0	0	0	0	0	0	0	0	0	0.0104998	0	0	0	0	0	0	0	0	0	0	0	0	0	0	0	0	0	0	0	0	0	0	0	0	0	0
chr17	35608387	35594008	+	AP2B1	1	1	0	0	0	0	0	0	0	0	0	0	0	0.013703	0	0	0	0	0	0	0	0	0	0	0	0	0	0	0	0	0	0	0	0	0	0	0	0	0	0	0	0	0	0	0
chr17	35627726	35624397	+	AP2B1	1	3	0	0	0	0	0	0	0	0	0	0	0	0	0	0	0	0	0	0	0	0.0177355	0	0	0	0	0	0	0	0	0	0	0	0	0	0	0	0	0	0	0	0	0	0	0
chr17	35820437	35817716	+	TAF15	1	1	0	0	0	0	0	0	0	0	0	0	0	0	0	0	0	0	0	0	0	0	0	0	0	0	0	0	0	0	0	0	0	0	0	0	0	0	0	0	0	0	0	0	0
chr17	35820437	35820024	+	TAF15	1	11	0	0	0	0	0	0.00897101	0	0	0	0	0	0	0	0	0	0	0	0	0	0	0	0	0	0	0.0143901	0	0	0	0	0	0	0.0127873	0	0	0	0	0	0.00773231	0.0131307	0	0	0	0
chr17	35822833	35817240	+	TAF15	1	1	0	0	0	0	0	0	0	0	0	0	0	0	0	0	0	0	0	0	0	0	0	0	0	0.01967	0	0	0	0	0	0	0	0	0	0	0	0	0	0	0	0	0	0	0
chr17	35822833	35817716	+	TAF15	1	1	0	0	0	0	0	0	0	0	0	0	0	0	0	0	0	0	0	0	0	0	0	0	0	0	0	0	0	0	0	0	0	0	0	0	0	0	0	0	0	0	0	0	0
chr17	35838553	35817716	+	TAF15	1	1	0	0	0	0	0	0	0	0	0	0	0	0	0	0	0	0	0	0	0	0	0.0105441	0	0	0	0	0	0	0	0	0	0	0	0	0	0	0	0	0	0	0	0	0	0
chr17	35838553	35824078	+	TAF15	1	2	0	0	0	0	0	0	0	0	0	0	0	0	0	0	0	0	0	0	0	0	0	0	0	0	0	0	0	0	0	0	0	0	0	0	0	0	0	0	0	0.005728	0	0	0
chr10	72508155	72566794	-	MICU1	1	2	0	0	0	0	0	0	0	0	0	0	0	0	0	0	0	0	0	0	0	0	0.0105441	0	0	0	0	0	0	0	0	0	0	0	0	0	0	0.0174408	0	0	0	0	0	0	0
chr17	36509062	36511455	-	MYO19	1	27	0	0	0	0	0	0.00897101	0	0	0.0215419	0	0.0225478	0	0	0	0	0	0	0	0	0	0	0	0.0103481	0.01967	0	0	0	0.0148968	0.0152018	0	0	0.0127873	0	0	0	0	0.0196896	0	0	0.005728	0	0.00800603	0.015239
chr17	36560871	36554820	+	GGNBP2	1	3	0	0	0	0	0	0	0	0	0.0215419	0	0	0	0	0	0	0	0	0	0	0	0	0	0	0	0	0	0	0	0	0	0	0	0	0	0	0	0	0	0	0	0	0	0
chr17	36560871	36557083	+	GGNBP2	1	3	0	0	0	0	0	0	0	0	0	0	0	0	0	0	0	0	0	0	0	0	0	0	0	0	0	0	0.00847806	0	0	0	0	0	0	0	0	0	0	0	0	0	0	0	0
chr17	36567776	36554820	+	GGNBP2	1	7	0	0	0	0	0	0	0	0	0	0	0	0	0	0	0	0	0	0	0	0	0	0	0	0	0	0	0.00847806	0	0	0.0104822	0	0	0	0	0	0	0	0.00773231	0	0	0	0	0
chr17	36581538	36577983	+	GGNBP2	1	1	0	0	0	0	0	0	0	0	0	0	0	0	0	0	0	0	0	0	0	0	0	0	0	0	0	0	0.00847806	0	0	0	0	0	0	0	0	0	0	0	0	0	0	0	0
chr17	36586198	36567663	+	GGNBP2	1	6	0	0	0	0	0	0	0	0	0	0	0	0	0	0	0	0	0	0	0	0	0	0	0	0	0	0	0	0	0	0	0.0102477	0	0	0	0	0	0	0.0154646	0	0.005728	0	0	0
chr17	36587245	36567663	+	GGNBP2	1	1	0	0	0	0	0	0	0	0	0	0	0	0	0	0.0145222	0	0	0	0	0	0	0	0	0	0	0	0	0	0	0	0	0	0	0	0	0	0	0	0	0	0	0	0	0
chr17	36587245	36577983	+	GGNBP2	1	1	0	0	0	0	0	0	0	0	0	0	0	0	0	0	0	0	0	0	0	0	0	0	0	0	0	0	0	0	0	0.0104822	0	0	0	0	0	0	0	0	0	0	0	0	0
chr17	36587245	36581344	+	GGNBP2	1	1	0	0	0	0	0	0	0	0	0	0	0	0	0	0	0	0	0	0	0	0	0	0	0	0	0	0	0	0	0	0	0	0	0	0	0	0	0	0	0	0	0.0191802	0	0
chr17	36953907	36952886	+	AATF	1	86	0.0265971	0	0.0311446	0	0.0502943	0.017942	0	0.0904177	0.0430839	0.0648291	0.0450957	0.0411091	0.0195497	0.0580888	0.0286185	0	0.0104998	0.00937882	0	0	0.0421765	0	0.0103481	0	0	0	0.00847806	0.0297937	0.0456055	0	0.0409908	0.0255745	0.0300755	0.0197506	0.0282301	0	0.0787584	0.00773231	0.0131307	0.05728	0.115081	0.0160121	0.015239
chr10	72551179	72566794	-	MICU1	1	7	0	0	0	0	0	0	0.0104492	0	0	0	0	0	0	0	0	0	0	0	0.0207708	0	0	0	0	0	0	0	0.00847806	0	0	0	0	0	0	0	0	0	0	0	0	0	0	0	0
chr17	36986731	36952886	+	AATF	1	2	0	0	0	0	0	0	0	0	0	0	0	0	0	0	0	0	0	0	0	0.0177355	0	0	0	0	0	0	0	0	0	0	0	0	0	0	0	0	0	0	0	0	0	0	0
chr17	36990857	36986617	+	AATF	1	4	0	0	0	0	0	0	0	0	0	0	0	0	0	0	0	0	0	0.00937882	0	0	0	0	0	0	0	0	0	0	0	0	0	0	0	0	0	0	0	0	0	0	0	0	0
chr17	36990857	36988519	+	AATF	1	1	0	0	0	0	0	0	0	0	0	0	0	0	0	0	0	0	0	0	0	0	0	0	0	0	0	0	0	0	0	0	0	0	0	0	0	0	0	0	0	0	0	0	0
chr17	37031685	36988519	+	AATF	1	2	0	0	0	0	0	0	0	0	0	0	0	0	0	0	0	0	0.0104998	0	0	0	0	0	0	0	0	0	0	0	0	0	0	0	0	0	0	0	0	0	0	0.005728	0	0	0
chr17	37149864	37181356	-	ACACA	1	13	0	0	0.0155723	0	0	0	0	0	0.0215419	0	0	0	0	0	0	0.013398	0	0	0	0	0	0	0.0103481	0	0	0	0	0	0	0	0	0	0	0	0	0	0.0196896	0	0	0	0	0	0
chr17	37161781	37200483	-	ACACA	1	1	0	0	0	0	0	0	0	0	0	0	0	0	0	0	0	0	0	0	0	0	0	0	0	0	0	0	0.00847806	0	0	0	0	0	0	0	0	0	0	0	0	0	0	0	0
chr17	37179260	37181356	-	ACACA	1	13	0	0	0	0	0	0	0	0	0.0215419	0	0	0	0	0	0	0	0	0.00937882	0	0	0.0210882	0	0	0	0	0.0128174	0	0	0	0.0104822	0	0	0	0	0	0.0174408	0	0	0	0.005728	0	0	0
chr17	37205765	37226452	-	ACACA	1	1	0	0	0	0	0	0	0	0	0	0	0	0	0	0	0	0	0	0	0	0	0	0	0	0	0	0	0	0	0	0	0	0	0	0	0	0	0	0	0	0.005728	0	0	0
chr17	37221724	37226452	-	ACACA	1	5	0	0	0	0	0	0	0	0	0	0	0	0	0	0	0	0	0	0	0	0	0	0	0	0	0	0.0128174	0	0	0	0	0	0	0	0	0	0	0	0	0	0	0	0	0
chr17	37246826	37253036	-	ACACA	1	34	0	0.0367461	0.0155723	0	0	0.00897101	0	0.0113022	0	0	0	0	0.0390993	0	0.0286185	0	0	0	0	0.0177355	0	0	0	0	0	0	0	0	0	0.0209643	0.0102477	0	0	0	0	0	0	0.00773231	0	0.005728	0	0.0160121	0
chr10	72562895	72566794	-	MICU1	1	26	0	0	0.0311446	0	0.0251472	0	0.0208984	0	0	0	0	0	0.0195497	0	0	0	0.0104998	0	0	0	0	0.0355851	0	0	0	0.0128174	0.00847806	0	0	0.0104822	0	0.0255745	0	0	0	0	0	0.00773231	0	0	0	0	0
chr17	37248011	37253036	-	ACACA	1	18	0.0132985	0	0	0	0	0	0	0	0	0	0	0	0	0.0145222	0.0143092	0.013398	0	0	0	0	0.0105441	0	0	0	0	0	0	0	0	0	0	0	0	0	0	0	0	0	0	0	0	0	0
chr17	37283267	37284970	-	ACACA	1	6	0	0	0	0	0	0	0	0	0	0	0	0	0	0.0290444	0	0	0.0104998	0	0	0	0	0	0	0	0	0	0	0	0	0	0	0.0255745	0	0	0	0	0	0	0	0	0	0	0
chr17	37283267	37289528	-	ACACA	1	33	0	0	0.0155723	0	0	0	0.0104492	0	0	0	0.0225478	0	0	0	0	0	0.0104998	0	0	0.0177355	0.0105441	0	0.0103481	0	0	0	0.00847806	0	0.0152018	0.0104822	0	0	0	0	0	0	0	0	0.0131307	0	0	0.0160121	0
chr17	37284838	37289528	-	ACACA	1	1	0	0	0	0	0	0.00897101	0	0	0	0	0	0	0	0	0	0	0	0	0	0	0	0	0	0	0	0	0	0	0	0	0	0	0	0	0	0	0	0	0	0	0	0	0
chr17	37330173	37330425	-	ACACA	1	1	0	0	0	0	0	0	0	0	0	0	0	0	0	0	0	0	0	0	0	0	0	0	0	0	0	0	0	0	0	0	0	0	0	0	0	0.0174408	0	0	0	0	0	0	0
chr17	37427009	37411269	+	TADA2A	1	1	0	0	0	0	0	0	0	0	0	0	0	0	0	0	0	0	0	0	0	0	0	0	0	0	0	0	0	0	0	0	0	0	0	0	0	0	0	0	0	0	0	0	0
chr17	37440662	37437738	+	TADA2A	1	25	0	0	0	0	0	0	0	0	0	0	0	0	0	0.0145222	0	0	0	0	0	0	0.0105441	0	0	0	0	0	0.00847806	0	0	0	0	0	0	0	0	0	0	0	0	0	0	0.00800603	0
chr17	37440662	37440505	+	TADA2A	1	9	0	0	0	0	0	0.00897101	0	0	0	0	0	0	0	0	0	0	0.0104998	0	0	0.0354709	0	0	0	0	0	0	0	0.0297937	0	0	0	0	0	0	0	0	0	0	0	0	0	0	0
chr17	37440662	37440509	+	TADA2A	1	5	0	0	0	0	0	0.00897101	0	0	0	0	0	0	0	0	0	0	0.0104998	0	0	0.0354709	0	0	0	0	0	0	0	0.0297937	0	0	0	0	0	0	0	0	0	0	0	0	0	0	0
chr17	37442652	37437738	+	TADA2A	1	8	0	0	0	0	0	0	0	0	0	0	0	0	0.0195497	0	0	0	0	0	0	0	0	0	0.0103481	0	0	0	0	0	0	0	0.0102477	0	0	0	0	0	0	0	0	0	0	0	0
chr10	72715902	72708283	+	MCU	1	113	0.0398956	0.0551191	0.0778615	0.244509	0.0502943	0.026913	0.0522461	0.0339066	0.0646258	0.0162073	0.0450957	0	0.0390993	0.101655	0.0715462	0.06699	0.146998	0.0844093	0.124625	0.0709419	0.105441	0.0355851	0.0310443	0	0.129511	0.0512697	0.0508683	0.0744842	0.0152018	0.0209643	0.071734	0.102298	0.0902266	0	0.0564602	0.0523225	0.098448	0.0695908	0.0656535	0.068736	0.0383604	0.0320241	0
chr17	37442652	37440505	+	TADA2A	1	22	0	0	0.0155723	0	0	0	0	0	0.0215419	0	0	0	0	0.0145222	0.0286185	0	0	0	0	0	0	0	0	0	0	0.0256349	0.0169561	0	0	0	0	0	0	0	0	0.0174408	0	0.0231969	0	0	0	0.0160121	0
chr17	37442652	37440509	+	TADA2A	1	13	0	0	0.0155723	0	0	0	0	0	0.0215419	0	0	0	0	0.0145222	0.0286185	0	0	0	0	0	0	0	0	0	0	0.0256349	0.0169561	0	0	0	0	0	0	0	0	0.0174408	0	0.0231969	0	0	0	0.0160121	0
chr17	37444768	37437738	+	TADA2A	1	39	0	0	0	0	0.0251472	0.017942	0.0104492	0	0	0	0	0.0274061	0	0	0	0	0.0104998	0.00937882	0	0	0	0	0	0	0.0143901	0	0	0	0.0152018	0.0104822	0	0	0	0.0197506	0	0	0.0590688	0	0	0.011456	0	0.0240181	0.030478
chr17	37444768	37440505	+	TADA2A	1	13	0	0	0	0.0244509	0	0	0	0	0	0	0	0	0.0195497	0	0	0	0	0	0	0	0	0	0	0	0	0	0	0	0	0	0	0	0	0	0	0	0	0	0	0	0	0	0
chr17	37458587	37440505	+	TADA2A	1	1	0	0	0	0	0	0	0	0	0	0	0	0	0	0	0	0	0	0	0	0	0	0	0	0	0	0	0	0	0	0	0	0	0	0	0	0	0	0	0	0	0	0	0
chr17	37462121	37437738	+	TADA2A	1	3	0	0	0	0	0	0	0	0	0	0	0	0	0	0	0	0	0	0	0	0	0	0	0	0	0	0	0	0	0.0152018	0	0	0	0	0	0	0	0	0	0	0	0	0	0
chr17	37462121	37440505	+	TADA2A	1	27	0	0	0	0	0	0.00897101	0	0	0	0	0	0	0	0	0	0	0.0209997	0.0187576	0	0	0.0105441	0.0177926	0.0206962	0	0.0143901	0	0	0.0297937	0	0.0104822	0	0.0383618	0	0	0	0	0	0	0.0262614	0.011456	0	0	0
chr17	37465541	37437738	+	TADA2A	1	10	0	0	0	0	0	0	0	0	0	0	0	0	0	0	0	0	0	0	0	0	0	0	0	0	0	0	0.00847806	0	0	0	0	0	0.0300755	0	0	0	0	0	0	0	0	0	0
chr17	37465541	37440505	+	TADA2A	1	35	0	0	0.0311446	0	0	0	0.0104492	0	0.0430839	0	0	0.0274061	0.0195497	0.0580888	0	0.013398	0.0104998	0	0	0.0354709	0.0210882	0	0	0	0.0287802	0.0128174	0	0	0	0	0	0	0	0	0	0	0	0	0	0	0	0	0
chr17	37467525	37437738	+	TADA2A	1	1	0	0	0	0	0	0	0	0.0226044	0	0	0	0	0	0	0	0	0	0	0	0	0	0	0	0	0	0	0	0	0	0	0	0	0	0	0	0	0	0	0	0	0	0	0
chr10	72715902	72715111	+	MCU	1	5	0	0	0	0	0	0	0	0	0	0	0	0	0	0	0	0	0	0	0	0	0	0	0	0	0	0	0	0	0	0	0	0	0	0.0197506	0	0	0	0	0	0	0	0	0
chr17	37467525	37440505	+	TADA2A	1	20	0	0	0	0	0.0251472	0.00897101	0	0	0	0	0	0	0	0	0.0143092	0.013398	0.0104998	0	0	0	0	0	0	0	0	0	0	0	0	0	0	0	0	0.0197506	0	0	0.0196896	0.0231969	0	0	0	0.00800603	0
chr17	37561195	37585430	-	SYNRG	1	2	0	0	0	0.0489018	0	0	0	0	0	0	0	0.013703	0	0	0	0	0	0	0	0	0	0	0	0	0	0	0	0	0	0	0	0	0	0	0	0	0	0	0	0	0	0	0
chr17	37568791	37585430	-	SYNRG	1	2	0	0	0	0	0	0	0	0	0	0	0	0	0	0	0	0	0	0	0	0	0	0	0	0	0	0	0	0	0	0	0	0	0	0	0	0	0	0	0	0.005728	0	0	0
chr17	37570637	37585430	-	SYNRG	1	1	0	0	0	0	0	0	0	0	0	0	0	0	0	0	0	0	0	0	0	0	0	0	0	0	0	0	0	0	0	0	0	0	0	0	0	0	0	0	0	0	0	0	0
chr17	37571791	37585430	-	SYNRG	1	6	0	0	0	0	0	0	0	0	0.0215419	0	0	0	0	0	0	0	0	0	0	0	0.0105441	0	0	0	0	0	0.00847806	0	0	0	0	0	0	0	0	0	0	0	0	0	0	0	0
chr17	37576341	37585430	-	SYNRG	1	24	0	0	0	0	0.0251472	0.00897101	0	0.0113022	0	0	0	0	0	0	0	0	0	0	0.0207708	0	0.0210882	0	0	0	0	0	0	0	0	0	0	0	0	0.0197506	0	0	0	0	0	0.005728	0	0.00800603	0
chr17	37576341	37586549	-	SYNRG	1	5	0	0	0	0	0	0	0	0	0	0	0	0	0	0	0	0	0	0	0	0	0.0105441	0	0	0	0	0	0	0	0	0	0	0.0127873	0	0	0	0	0	0	0	0	0	0	0
chr17	37584648	37585430	-	SYNRG	1	2	0	0	0	0	0	0	0	0	0	0	0	0	0	0	0	0	0	0	0	0	0	0	0	0	0	0	0.0169561	0	0	0	0	0	0	0	0	0	0	0.0154646	0	0	0	0	0
chr17	37584648	37586549	-	SYNRG	1	4	0	0	0	0	0	0	0	0	0	0	0	0	0	0	0	0	0	0	0	0	0	0	0	0	0	0	0	0	0	0	0.0102477	0	0	0	0	0	0	0	0	0	0	0	0
chr17	37584648	37600403	-	SYNRG	1	1	0	0	0	0	0	0	0	0	0	0	0	0	0	0	0	0	0	0	0	0.0354709	0	0	0	0	0	0	0	0	0	0	0	0	0	0	0	0	0	0	0	0	0	0	0
chr10	7276892	7285954	-	SFMBT2	1	117	0.0797912	0.0367461	0.0467169	0.0244509	0	0.0717681	0.0522461	0.0904177	0.0646258	0.0972437	0.0676435	0.0685152	0.0390993	0.0580888	0.157402	0.187572	0.115498	0.0468941	0.0830832	0.0709419	0.105441	0.0177926	0.0413924	0.11802	0.0575603	0	0.0423903	0.178762	0.0760092	0.0733752	0.0819817	0.115085	0.0300755	0.0987532	0.0282301	0.156968	0.0590688	0.0618585	0.0525228	0.040096	0	0.0400301	0.0457169
chr17	37618292	37628672	-	DDX52	1	1	0	0	0	0	0	0	0	0	0	0	0	0	0	0	0	0	0	0	0	0	0	0	0	0	0	0	0	0	0	0	0	0	0	0	0	0	0	0	0	0	0	0	0
chr17	3814322	3816270	-	NCBP3	1	18	0	0	0	0	0	0	0	0	0	0	0	0	0.0390993	0.0145222	0	0	0	0	0	0	0	0	0	0	0	0	0	0	0.0152018	0.0209643	0	0	0	0	0	0	0	0.00773231	0	0.011456	0	0	0
chr17	3814322	3818572	-	NCBP3	1	1	0	0	0	0	0	0	0	0	0	0	0	0	0	0	0	0	0	0	0	0	0	0	0	0	0	0	0	0	0	0	0	0	0	0	0	0	0	0	0	0	0	0	0
chr17	38368050	38361711	+	SOCS7	1	27	0	0	0	0.0733527	0	0	0.0104492	0	0	0	0	0.013703	0	0	0	0	0	0	0	0	0.0210882	0	0.0206962	0	0	0.0128174	0	0	0.0152018	0	0	0	0	0	0	0	0	0	0	0	0	0	0
chr17	38377842	38361711	+	SOCS7	1	21	0	0	0	0	0	0	0	0	0.0215419	0.0162073	0	0	0	0.0290444	0	0	0.0209997	0	0	0	0	0	0	0	0	0	0	0	0	0	0	0	0	0	0	0	0	0.00773231	0	0.011456	0	0.0160121	0
chr17	38377842	38364752	+	SOCS7	1	2	0	0	0	0	0	0	0	0	0	0	0	0	0	0	0	0	0	0	0	0	0	0	0	0	0	0	0	0	0	0	0	0	0	0	0	0	0	0.00773231	0	0	0	0	0
chr17	38395998	38395309	+	SOCS7	1	5	0	0	0	0	0	0	0	0	0	0	0.0225478	0	0	0.0145222	0	0	0	0	0	0	0	0	0	0	0	0	0	0	0	0	0	0	0	0	0	0	0	0	0	0	0	0	0
chr17	38777687	38786920	-	PIP4K2B	1	10	0	0	0	0	0	0	0	0	0	0.0162073	0	0.013703	0	0	0	0	0.0209997	0	0	0	0	0	0	0	0	0	0	0	0	0	0	0.0127873	0	0	0	0	0	0.00773231	0	0	0	0	0
chr17	39216810	39217173	-	STAC2	1	7	0	0	0	0	0	0	0	0	0	0	0	0	0	0	0	0	0	0	0	0.0532064	0	0	0	0	0	0	0	0.0148968	0	0	0	0	0	0	0	0	0	0	0	0	0	0	0
chr17	39264175	39275100	-	FBXL20	1	2	0	0	0	0	0	0	0	0	0	0	0	0	0	0	0	0	0	0	0	0	0	0	0.0103481	0	0	0	0	0	0	0	0	0	0	0	0	0	0	0	0	0	0	0	0
chr10	7276892	7381949	-	SFMBT2	1	22	0	0	0	0	0	0	0	0	0	0	0	0	0	0.0145222	0	0.040194	0	0	0	0	0	0	0	0	0	0	0	0	0	0	0.0102477	0	0	0	0	0	0	0	0	0	0	0.00800603	0
chr17	39268827	39275100	-	FBXL20	1	1	0	0	0	0	0	0	0	0	0	0	0	0	0	0	0	0	0	0	0	0	0	0	0	0	0	0	0	0	0	0	0	0	0	0	0	0	0	0	0	0	0	0.0160121	0
chr17	39281389	39282855	-	FBXL20	1	1	0	0	0	0	0	0	0	0	0	0	0	0	0	0	0	0	0	0	0	0	0	0	0	0	0	0	0	0	0	0	0	0	0	0	0	0	0	0	0	0	0	0	0
chr17	39281389	39297195	-	FBXL20	1	2	0	0	0	0	0	0	0	0	0	0	0	0	0	0	0	0	0	0	0	0	0	0	0	0	0	0	0	0	0	0	0	0	0	0	0	0	0	0	0	0	0	0	0
chr17	39281389	39301075	-	FBXL20	1	1	0	0	0	0	0	0	0	0	0	0	0	0	0	0	0	0	0	0	0	0	0	0	0	0	0	0	0	0	0	0	0	0	0	0	0	0	0	0	0	0	0	0	0
chr17	39281389	39303639	-	FBXL20	1	3	0	0	0	0	0	0	0	0	0	0	0	0.013703	0	0	0	0	0	0	0	0	0	0	0	0	0	0	0	0	0	0	0	0	0	0	0	0	0	0	0	0	0	0	0
chr17	39297127	39301075	-	FBXL20	1	3	0	0	0	0	0	0	0	0	0	0	0	0	0	0	0	0	0	0	0	0	0	0	0	0	0	0	0.0169561	0	0	0	0	0	0	0	0	0	0	0	0	0	0	0	0
chr17	39297127	39303639	-	FBXL20	1	8	0	0	0	0	0	0	0	0	0	0	0	0	0	0.0145222	0	0	0	0.0187576	0	0	0	0	0	0	0	0.0128174	0	0	0	0	0	0	0	0	0	0	0	0	0	0	0	0	0
chr17	39297127	39343241	-	FBXL20	1	23	0	0	0.0155723	0	0	0	0	0	0	0	0	0	0.0195497	0	0	0	0	0	0	0	0	0	0	0.01967	0	0	0	0	0	0	0	0.0127873	0	0	0	0.0174408	0.0196896	0	0	0	0	0	0
chr17	39298990	39301075	-	FBXL20	1	1	0	0	0	0	0	0	0	0	0	0	0	0	0	0	0	0	0	0	0	0	0.0105441	0	0	0	0	0	0	0	0	0	0	0	0	0	0	0	0	0	0	0	0	0	0
chr17	39419717	39427790	-	MED1	1	2	0	0	0	0	0	0	0	0	0	0	0	0	0	0	0	0	0	0	0	0	0	0	0	0	0	0	0	0	0	0	0	0	0	0	0	0	0	0	0	0	0	0	0
chr10	7283904	7285954	-	SFMBT2	1	4	0	0	0	0	0	0	0	0.0113022	0	0	0	0	0	0	0	0.013398	0	0	0	0	0	0	0	0	0	0	0	0	0	0	0	0.0127873	0	0	0	0	0	0	0	0	0	0	0
chr17	39423327	39427790	-	MED1	1	7	0	0	0	0	0	0	0	0	0	0	0	0	0	0	0	0.013398	0	0	0	0	0.0105441	0	0	0	0	0	0	0	0	0	0	0.0127873	0	0	0	0	0	0	0	0	0	0	0
chr17	39424627	39431188	-	MED1	1	2	0	0	0	0	0	0	0	0	0	0	0	0	0	0	0	0	0	0	0	0	0	0	0	0	0	0	0	0	0	0	0	0.0127873	0	0	0	0	0	0	0	0	0	0	0
chr17	39439165	39443628	-	MED1	1	1	0	0	0	0	0	0	0	0	0	0	0	0	0	0	0	0	0	0	0	0	0	0	0	0	0	0	0	0	0	0	0	0	0	0	0	0	0	0.00773231	0	0	0	0	0
chr17	39492890	39490557	+	CDK12	1	6	0	0	0	0	0	0	0	0	0	0.0162073	0	0	0	0	0	0	0	0	0	0	0	0	0	0	0	0	0.00847806	0	0	0	0	0.0127873	0	0	0	0	0	0.00773231	0	0	0	0	0
chr17	39501439	39490557	+	CDK12	1	1	0	0	0	0	0	0	0	0	0	0	0	0	0	0	0	0	0	0	0	0	0	0	0	0	0	0	0	0	0	0	0	0	0	0	0	0	0	0.00773231	0	0	0	0	0
chr17	39509761	39490557	+	CDK12	1	1	0	0	0	0	0	0	0	0	0	0	0	0	0	0	0	0	0	0	0	0	0	0	0	0	0	0	0	0	0	0	0	0	0	0	0	0	0	0	0	0	0	0	0
chr17	39520087	39490557	+	CDK12	1	1	0	0	0	0	0	0	0	0	0	0	0	0	0	0	0	0	0	0	0	0	0	0	0	0	0	0.0128174	0	0	0	0	0	0	0	0	0	0	0	0	0	0	0	0	0
chr17	39908958	39909924	-	GSDMB	1	7	0	0	0	0	0	0	0	0	0	0	0	0	0	0	0.0143092	0	0	0	0	0	0	0	0	0	0	0	0	0.0148968	0	0	0	0	0	0	0	0	0	0	0	0.005728	0	0	0
chr17	40053298	40053635	-	MED24	1	4	0	0	0	0.0244509	0	0	0	0	0	0	0	0	0	0.0145222	0	0	0	0	0	0	0	0	0	0	0	0	0	0	0	0	0	0	0	0	0	0	0	0.00773231	0	0	0	0	0
chr17	40053298	40053657	-	MED24	1	2	0	0	0	0	0	0	0	0	0	0	0	0	0	0	0	0	0	0	0	0	0	0	0	0	0	0	0	0.0148968	0	0	0	0	0	0	0	0	0	0	0	0	0	0	0
chr10	105247331	105211137	+	SORCS3	1	4	0	0	0.0311446	0	0	0	0	0	0	0	0	0	0	0	0	0	0	0	0	0	0	0	0	0	0	0	0	0	0	0	0	0	0	0	0	0	0	0	0	0	0	0	0
chr10	73016846	73047101	-	P4HA1	1	1	0	0	0	0	0	0	0	0	0	0	0	0	0	0	0	0	0	0	0	0	0	0.0177926	0	0	0	0	0	0	0	0	0	0	0	0	0	0	0	0	0	0	0	0	0
chr17	40084815	40083835	+	THRA	1	1	0	0	0	0	0	0	0	0	0	0	0	0	0	0.0145222	0	0	0	0	0	0	0	0	0	0	0	0	0	0	0	0	0	0	0	0	0	0	0	0	0	0	0	0	0
chr17	40126406	40126183	+	MSL1	1	66	0.0132985	0	0.0155723	0	0	0.00897101	0.0104492	0.0113022	0	0	0.0225478	0.013703	0	0.0435666	0.0143092	0	0.0209997	0.0187576	0	0	0.0105441	0	0	0	0.0143901	0	0.00847806	0.0595873	0	0.0209643	0	0.0255745	0	0	0	0	0.0196896	0.0154646	0.0262614	0.02864	0	0.0240181	0
chr17	40162901	40161753	+	CASC3	1	4	0	0	0	0	0	0	0	0	0	0	0	0	0	0.0145222	0	0	0	0	0	0	0	0	0	0	0	0	0	0	0	0	0	0	0	0	0	0	0	0	0	0	0	0	0
chr17	40189375	40188866	+	RAPGEFL1	1	6	0	0	0	0	0	0	0	0	0	0	0	0	0	0	0	0	0	0	0	0	0	0	0	0	0	0	0	0	0	0	0	0	0	0	0	0	0	0	0	0.005728	0	0	0
chr17	4021129	4025118	-	ZZEF1	1	26	0	0	0	0	0	0	0	0	0	0	0	0	0	0	0.0143092	0	0	0	0	0	0	0	0	0	0.0287802	0.0128174	0.00847806	0	0	0.0209643	0	0	0	0	0.0282301	0	0	0	0	0	0	0.0160121	0
chr17	40262641	40260535	+	WIPF2	1	6	0	0	0	0	0	0.00897101	0	0	0	0	0	0	0	0	0	0	0	0	0	0	0	0	0	0	0	0	0	0.0148968	0	0	0	0	0	0	0	0	0	0	0	0	0	0	0
chr17	4034015	4064829	-	ZZEF1	1	3	0	0	0	0	0	0	0	0	0	0	0	0	0	0	0	0	0	0	0	0	0	0	0	0	0	0	0	0	0	0	0	0	0	0	0	0	0	0	0	0	0	0	0
chr17	4042429	4044374	-	ZZEF1	1	1	0	0	0	0	0	0.00897101	0	0	0	0	0	0	0	0	0	0	0	0	0	0	0	0	0	0	0	0	0	0	0	0	0	0	0	0	0	0	0	0	0	0	0	0	0
chr17	4051971	4058155	-	ZZEF1	1	14	0	0	0	0	0	0	0	0	0	0	0	0	0	0	0	0	0	0	0	0	0.0105441	0	0.0103481	0	0	0	0.00847806	0	0	0	0	0	0	0	0.0282301	0	0	0	0	0	0	0.00800603	0
chr17	4051971	4064829	-	ZZEF1	1	7	0	0	0	0	0	0	0	0	0	0	0	0	0	0	0	0	0	0	0	0	0	0	0	0	0	0	0	0	0	0	0	0	0	0	0	0	0	0.00773231	0	0.011456	0	0	0
chr10	73030271	73068983	-	P4HA1	1	4	0	0	0	0	0	0	0.0104492	0	0	0	0	0	0	0	0	0	0	0	0	0	0	0	0.0103481	0	0	0	0	0.0148968	0	0	0	0	0	0	0	0	0	0	0	0	0	0	0
chr17	4051971	4067242	-	ZZEF1	1	17	0	0	0	0	0	0	0	0.0113022	0	0	0	0	0	0	0	0	0	0.00937882	0	0	0	0	0.0103481	0	0	0.0128174	0.00847806	0	0	0	0	0	0	0	0	0	0	0	0	0	0	0	0.015239
chr17	4064361	4067242	-	ZZEF1	1	2	0	0	0	0	0	0	0	0	0	0	0	0	0	0	0	0	0	0	0	0	0	0	0	0	0	0	0	0	0	0	0	0	0	0	0	0	0	0	0	0	0	0	0
chr17	4066447	4072756	-	ZZEF1	1	63	0	0.018373	0	0	0.0251472	0.017942	0.0104492	0.056511	0	0.0324146	0	0.0274061	0	0.0145222	0	0	0	0	0.0415416	0	0.0316324	0	0	0	0	0.0128174	0.00847806	0.0148968	0.0608073	0	0	0	0	0	0	0.0174408	0.0196896	0.00773231	0.0262614	0.011456	0	0.0240181	0
chr17	4067163	4074351	-	ZZEF1	1	1	0	0	0	0	0	0	0	0	0	0	0	0	0	0	0	0	0	0	0	0	0	0	0	0	0	0.0384523	0	0	0	0	0	0	0	0	0	0	0	0	0	0	0	0	0
chr17	4081376	4082507	-	ZZEF1	1	1	0	0	0	0	0	0	0	0	0	0	0	0	0	0	0	0	0	0	0	0	0	0	0	0	0	0	0	0	0	0	0	0	0	0	0	0	0.0196896	0	0	0	0	0	0
chr17	41827426	41828952	-	NT5C3B	1	1	0	0	0	0	0	0	0	0	0	0	0	0	0	0	0	0.013398	0	0	0	0	0	0	0	0	0	0	0	0	0	0	0	0	0	0	0	0	0	0	0	0	0	0	0
chr17	41828790	41830890	-	NT5C3B	1	4	0	0	0	0	0	0	0	0	0	0	0	0	0	0.0145222	0	0	0	0	0	0	0	0	0	0	0	0	0	0	0	0	0	0	0	0	0	0	0	0	0	0	0	0	0
chr17	41828790	41832477	-	NT5C3B	1	8	0	0	0	0	0.0251472	0	0	0	0	0	0	0.013703	0	0	0	0	0	0	0	0	0	0	0	0	0	0	0	0	0	0	0	0	0	0	0	0	0	0.00773231	0	0.005728	0	0.00800603	0
chr17	4197373	4209947	-	ANKFY1	1	1	0	0	0	0	0	0	0.0104492	0	0	0	0	0	0	0	0	0	0	0	0	0	0	0	0	0	0	0	0	0	0	0	0	0	0	0	0	0	0	0	0	0	0	0	0
chr17	4197373	4217118	-	ANKFY1	1	1	0	0	0	0	0	0	0	0	0	0	0	0	0	0	0	0	0.0104998	0	0	0	0	0	0	0	0	0	0	0	0	0	0	0	0	0	0	0	0	0	0	0	0	0	0
chr10	73134603	73152421	-	ECD	1	2	0	0	0	0	0	0	0	0	0	0	0	0	0	0	0	0	0	0	0.0207708	0	0	0	0	0	0	0	0	0	0	0	0	0	0	0	0	0	0	0	0	0	0	0	0
chr17	41981855	41982401	-	DNAJC7	1	3	0	0	0	0	0	0	0	0	0	0	0	0	0	0	0	0	0.0209997	0	0	0	0	0	0	0	0	0	0	0	0	0	0	0	0	0	0	0	0	0	0	0	0	0	0
chr17	41987819	41990382	-	DNAJC7	1	1	0	0	0	0	0	0	0	0	0	0	0	0	0	0	0	0	0	0	0	0	0	0	0	0	0	0	0	0	0	0	0	0	0	0	0	0	0	0	0	0	0	0	0
chr17	42022640	42022399	+	NKIRAS2	1	3	0	0	0	0	0	0	0	0	0	0	0	0	0	0	0	0	0	0	0	0	0	0	0	0	0	0	0.0254342	0	0	0	0	0	0	0	0	0	0	0	0	0	0	0	0
chr17	4216983	4242448	-	ANKFY1	1	2	0	0	0	0	0	0	0	0	0	0	0	0	0	0	0	0	0	0	0	0	0	0	0	0	0	0	0	0	0	0	0	0	0	0	0	0	0	0	0	0	0	0	0
chr17	42324711	42325061	-	STAT3	1	1	0	0	0	0	0	0	0	0	0	0	0	0	0	0	0	0	0.0104998	0	0	0	0	0	0	0	0	0	0	0	0	0	0	0	0	0	0	0	0	0	0	0	0	0	0
chr17	42345559	42348517	-	STAT3	1	8	0	0	0	0	0	0	0	0	0	0	0	0	0	0	0.0143092	0	0	0	0	0	0	0	0.0103481	0	0	0	0	0	0	0.0104822	0	0	0	0	0	0.0174408	0	0	0	0	0	0	0
chr17	42345559	42348520	-	STAT3	1	8	0	0	0	0	0	0	0	0	0	0	0	0	0	0	0.0143092	0	0	0	0	0	0	0	0.0103481	0	0	0	0	0	0	0.0104822	0	0	0	0	0	0.0174408	0	0	0	0	0	0	0
chr17	42345559	42348539	-	STAT3	1	6	0	0	0	0	0	0	0	0	0	0	0	0	0	0.0145222	0	0	0	0.00937882	0	0	0	0	0	0	0	0.0128174	0	0	0	0	0	0	0	0	0	0	0	0	0	0	0	0	0
chr17	4235772	4242448	-	ANKFY1	1	6	0	0	0	0	0	0	0	0	0	0	0	0	0	0	0	0	0	0	0	0	0	0	0.0103481	0	0	0	0	0	0	0	0	0	0	0	0	0	0	0	0	0	0	0	0
chr17	4242256	4242448	-	ANKFY1	1	4	0	0	0	0	0	0	0	0	0	0	0	0	0	0	0	0	0	0	0	0	0	0	0	0	0	0	0	0	0	0	0.0102477	0	0	0	0	0	0	0	0	0	0	0.00800603	0
chr10	73134603	73163950	-	ECD	1	8	0	0.018373	0	0	0	0	0	0	0	0	0	0	0	0.0145222	0	0	0	0	0	0	0	0	0	0	0	0	0	0	0	0	0	0	0	0	0	0	0	0	0.0131307	0	0	0	0
chr17	42470218	42468010	+	ATP6V0A1	1	6	0	0	0	0	0	0.00897101	0	0	0	0	0	0	0	0	0	0	0	0	0	0.0177355	0.0105441	0	0	0	0	0	0	0	0	0	0	0	0	0	0	0	0	0	0	0	0	0	0
chr17	42478589	42468010	+	ATP6V0A1	1	1	0	0	0	0	0	0	0	0	0	0	0	0	0	0	0	0	0	0	0	0	0	0	0	0	0	0	0	0	0	0	0	0	0	0	0	0	0	0	0	0	0	0	0
chr17	42480749	42468010	+	ATP6V0A1	1	1	0	0	0	0	0	0	0	0	0	0	0	0	0	0	0	0	0	0	0	0	0	0	0	0	0	0.0128174	0	0	0	0	0	0	0	0	0	0	0	0	0	0	0	0	0
chr17	42483131	42468010	+	ATP6V0A1	1	3	0	0	0	0	0	0.00897101	0	0	0	0	0	0	0	0	0	0	0	0	0	0	0	0	0	0	0	0	0	0	0	0	0	0	0	0	0	0	0	0	0	0.005728	0	0	0
chr17	42494473	42480667	+	ATP6V0A1	1	29	0	0	0.0311446	0	0	0.017942	0	0	0.0215419	0.0162073	0	0	0	0	0.0143092	0	0	0	0	0	0	0	0.0310443	0	0	0	0	0	0	0	0	0	0.0300755	0	0	0	0	0	0.0131307	0	0	0.00800603	0
chr17	42494473	42483038	+	ATP6V0A1	1	5	0	0	0	0	0	0	0	0	0	0	0	0	0	0	0	0	0	0	0	0	0	0	0	0	0	0	0	0.0148968	0	0	0	0	0	0	0	0	0	0	0	0	0	0	0
chr17	42494473	42490487	+	ATP6V0A1	1	1	0	0	0	0	0	0	0	0	0	0	0	0	0	0.0145222	0	0	0	0	0	0	0	0	0	0	0	0	0	0	0	0	0	0	0	0	0	0	0	0	0	0	0	0	0
chr17	42495716	42480667	+	ATP6V0A1	1	5	0	0	0	0	0	0	0	0	0	0	0	0	0	0	0	0	0	0	0	0	0	0	0	0	0	0	0	0	0	0	0	0	0	0	0	0	0	0	0	0	0	0	0
chr17	42495716	42490487	+	ATP6V0A1	1	1	0	0	0	0	0	0	0	0	0	0	0	0	0	0	0	0	0	0	0	0	0.0105441	0	0	0	0	0	0	0	0	0	0	0	0	0	0	0	0	0	0	0	0	0	0
chr17	42499042	42480667	+	ATP6V0A1	1	4	0	0	0	0	0	0	0.0104492	0	0	0	0	0	0	0	0	0	0	0	0	0	0	0	0	0	0	0	0	0	0	0	0	0	0	0	0	0.0174408	0	0	0	0.005728	0	0	0
chr10	73146276	73156655	-	ECD	1	3	0	0	0	0	0	0	0	0	0	0	0	0	0	0	0	0	0	0	0	0	0	0	0	0	0	0	0	0	0	0	0	0	0	0	0	0	0	0	0	0	0	0	0
chr17	42499042	42487155	+	ATP6V0A1	1	1	0	0	0	0	0	0	0	0	0	0	0	0	0	0	0	0	0	0	0	0	0	0	0	0	0	0	0	0	0	0	0	0	0	0	0	0	0	0	0	0	0	0	0
chr17	42501304	42477660	+	ATP6V0A1	1	1	0	0	0	0	0	0	0	0	0	0	0	0	0	0.0145222	0	0	0	0	0	0	0	0	0	0	0	0	0	0	0	0	0	0	0	0	0	0	0	0	0	0	0	0	0
chr17	42501304	42483038	+	ATP6V0A1	1	2	0	0	0.0155723	0	0	0	0	0	0	0	0	0	0	0	0	0	0	0	0	0	0	0	0	0	0	0	0	0	0	0	0	0	0	0	0	0	0	0	0	0	0	0	0
chr17	42501304	42487155	+	ATP6V0A1	1	1	0	0	0	0	0	0	0	0	0	0	0	0	0	0	0	0	0	0	0	0	0	0	0	0	0	0	0	0	0.0152018	0	0	0	0	0	0	0	0	0	0	0	0	0	0
chr17	42501304	42490487	+	ATP6V0A1	1	1	0	0	0	0	0	0	0	0	0	0	0	0	0	0	0	0	0	0	0	0	0	0	0	0	0	0	0	0	0	0	0	0	0	0	0	0	0	0	0	0	0	0	0
chr17	42501304	42495034	+	ATP6V0A1	1	3	0	0	0	0	0	0	0.0104492	0	0	0	0	0	0	0	0	0	0	0	0	0	0	0	0	0	0	0	0	0	0	0	0	0	0	0	0.0564602	0	0	0	0	0	0	0	0
chr17	42501304	42498924	+	ATP6V0A1	1	85	0.0132985	0.0367461	0.0155723	0	0	0	0.0104492	0	0.0646258	0	0.0225478	0.0411091	0.058649	0	0.0286185	0	0.0314995	0.0281364	0	0.0709419	0.0527206	0.0177926	0.0310443	0	0.0287802	0.0512697	0.0508683	0.0595873	0.0304037	0.0209643	0	0.0639363	0	0.0592519	0	0.0174408	0	0.0309292	0	0.022912	0.115081	0	0
chr17	42501304	42500707	+	ATP6V0A1	1	54	0	0	0.0311446	0	0	0	0	0.0113022	0	0	0	0.0411091	0	0.0290444	0	0	0	0	0.0207708	0	0.0105441	0	0	0	0	0.0640871	0	0	0	0	0.0307431	0	0	0.0395013	0	0.0174408	0.0590688	0	0	0.011456	0.0191802	0.00800603	0.015239
chr17	42502868	42498924	+	ATP6V0A1	1	1	0	0	0	0	0	0	0	0.0226044	0	0	0	0	0	0	0	0	0	0	0	0	0	0	0	0	0	0	0	0	0	0	0	0	0	0	0	0	0	0	0	0	0	0	0
chr17	42508589	42480667	+	ATP6V0A1	1	1	0	0	0	0	0	0	0	0	0	0	0	0	0	0	0	0	0	0	0	0	0	0	0	0	0	0	0	0	0	0	0	0	0	0	0	0	0	0	0	0	0	0	0
chr10	73146276	73163950	-	ECD	1	45	0	0.0551191	0	0	0	0	0.0104492	0.0226044	0	0	0	0	0	0	0	0	0	0.0281364	0.0207708	0	0.0210882	0	0.0103481	0	0	0	0.00847806	0	0	0.0104822	0	0	0.0300755	0	0	0.0174408	0.0196896	0	0	0.011456	0.0383604	0	0
chr17	42613073	42612075	+	TUBG1	1	2	0	0	0	0	0	0	0	0	0	0	0	0	0	0	0	0	0	0	0	0	0	0	0.0103481	0	0	0	0	0	0	0	0	0	0	0	0	0	0	0	0	0	0	0	0
chr17	42702877	42708916	-	EZH1	1	1	0	0	0	0	0	0	0	0	0	0	0	0	0	0	0	0	0	0	0	0	0	0	0	0	0	0	0	0	0	0	0	0	0	0	0	0	0	0	0	0	0	0	0
chr1	74271708	74236102	+	FPGT-TNNI3K,TNNI3K	1	8	0	0	0	0	0	0	0	0	0	0	0	0	0	0	0	0	0	0	0	0	0	0	0.0103481	0	0	0.0128174	0.00847806	0	0	0	0	0	0	0	0	0	0	0	0	0	0	0	0
chr1	74271708	74249459	+	FPGT-TNNI3K,TNNI3K	1	6	0	0	0.0155723	0	0	0	0	0	0	0	0	0.013703	0	0	0	0	0	0	0	0	0	0	0	0	0	0	0	0	0	0	0	0	0	0	0	0	0	0	0	0	0	0	0
chr17	42720273	42724424	-	EZH1	1	2	0	0	0	0	0	0	0	0	0	0	0	0	0	0	0	0	0	0	0	0	0	0	0	0	0	0	0	0	0	0	0	0	0	0	0	0	0	0	0	0	0	0	0
chr17	42720273	42727763	-	EZH1	1	3	0	0	0	0	0.0251472	0	0	0	0	0	0	0	0	0	0	0	0	0	0	0	0.0316324	0	0	0	0	0	0	0	0	0	0	0	0	0	0	0	0	0	0	0	0	0	0
chr17	42720273	42730918	-	EZH1	1	2	0	0	0	0	0	0	0	0	0	0	0	0	0	0	0	0	0	0	0	0	0	0	0	0	0	0.0128174	0	0	0	0	0	0	0	0	0	0	0	0	0	0	0	0	0
chr17	42727635	42728952	-	EZH1	1	13	0	0	0	0	0	0	0	0	0	0	0	0	0	0	0.0286185	0	0.0104998	0	0	0	0	0	0	0	0	0	0	0	0	0	0	0	0	0.0197506	0	0	0	0	0.0393921	0	0	0	0
chr17	42727635	42730918	-	EZH1	1	57	0.0265971	0	0	0.0244509	0	0	0.0104492	0.0226044	0	0.0162073	0	0	0	0.0145222	0	0.013398	0.0104998	0.00937882	0	0.0177355	0.0105441	0.0177926	0.0103481	0	0	0	0.00847806	0	0.0304037	0	0.0204954	0.0127873	0	0	0	0	0	0.0154646	0	0.005728	0.0191802	0	0.015239
chr17	42727662	42730918	-	EZH1	1	5	0	0	0	0	0	0	0	0	0	0	0	0	0	0	0	0	0	0	0	0	0	0	0	0	0	0	0	0	0	0	0	0	0	0	0	0.0174408	0	0	0	0	0	0.00800603	0
chr10	73154256	73163950	-	ECD	1	1	0	0	0	0	0	0	0	0	0	0	0	0	0	0	0	0	0	0	0	0	0	0	0	0	0	0	0	0	0	0	0	0	0	0	0	0	0	0	0	0	0	0	0
chr17	42728825	42730918	-	EZH1	1	16	0	0	0	0	0	0.017942	0	0	0	0	0	0.013703	0.0195497	0	0	0	0	0.00937882	0	0	0	0	0	0	0	0	0	0	0	0	0	0	0	0	0	0	0	0.0154646	0	0	0	0.0160121	0
chr17	42818221	42820841	-	BECN1	1	1	0	0	0	0	0	0	0	0	0	0	0	0	0	0	0	0	0	0	0	0	0	0	0	0	0	0	0	0	0	0	0	0	0	0	0	0	0	0	0	0	0	0	0
chr17	4282798	4296814	-	UBE2G1	1	72	0.0132985	0.0367461	0	0	0	0.0448551	0.0104492	0	0.0430839	0.0162073	0.0450957	0.0274061	0.058649	0	0.057237	0	0	0	0	0.0177355	0.0632647	0.0177926	0	0	0	0.0512697	0.0254342	0.0148968	0.0152018	0.0104822	0	0.0127873	0	0	0	0.0523225	0.0393792	0.0154646	0.0131307	0.068736	0.0191802	0.0240181	0
chr17	4282798	4307123	-	UBE2G1	1	24	0	0	0.0155723	0	0	0	0	0	0	0	0	0	0	0	0	0	0.0209997	0	0	0	0	0	0	0	0	0	0	0.0148968	0	0	0.0102477	0	0	0	0	0.0174408	0	0.00773231	0	0	0	0	0
chr17	42839380	42837649	+	PSME3	1	18	0	0	0	0.0244509	0	0	0	0	0	0	0	0	0	0.0145222	0	0.013398	0	0	0	0	0.0105441	0	0	0	0	0	0	0	0	0	0	0	0	0	0	0.0174408	0	0	0	0.005728	0	0.00800603	0
chr17	42839380	42838731	+	PSME3	1	15	0	0	0	0	0	0	0	0	0	0	0	0	0	0	0	0	0	0	0	0	0	0	0	0	0	0.0128174	0.00847806	0	0	0	0.0102477	0	0	0	0	0	0.0196896	0	0	0	0	0.00800603	0
chr17	43047643	43067695	-	BRCA1	1	1	0	0	0	0	0	0	0	0	0	0	0	0	0	0	0	0	0	0	0	0	0	0	0	0	0	0	0	0	0.0152018	0	0	0	0	0	0	0	0	0	0	0	0	0	0
chr17	43082404	43094860	-	BRCA1	1	1	0	0	0	0	0	0	0	0	0	0	0	0	0	0	0	0	0	0	0	0	0	0	0	0	0	0	0	0	0	0	0	0	0	0	0	0	0	0	0	0	0	0	0
chr17	43104122	43115779	-	BRCA1	1	1	0	0	0	0	0	0	0	0	0	0	0	0	0	0	0	0	0	0	0	0	0	0	0.0103481	0	0	0	0	0	0	0	0	0	0	0	0	0	0	0	0	0	0	0	0
chr17	43203786	43201686	+	NBR1	1	1	0	0	0	0	0	0	0	0	0	0	0	0	0	0	0	0	0	0	0	0	0	0	0	0	0	0	0	0	0	0	0	0	0	0	0	0	0	0	0	0.005728	0	0	0
chr10	73269614	73278337	-	CFAP70	1	1	0	0	0	0	0	0	0	0	0	0	0	0	0	0	0	0	0	0	0	0	0.0105441	0	0	0	0	0	0	0	0	0	0	0	0	0	0	0	0	0	0	0	0	0	0
chr1	74370392	74249459	+	FPGT-TNNI3K,TNNI3K	1	2	0	0	0	0	0	0	0	0	0	0	0	0	0	0.0145222	0	0	0	0	0	0	0	0	0.0103481	0	0	0	0	0	0	0	0	0	0	0	0	0	0	0	0	0	0	0	0
chr17	44080107	44080882	-	HDAC5	1	2	0	0	0	0	0	0	0	0	0	0	0	0	0	0	0	0	0	0	0	0	0	0	0	0	0	0	0	0	0	0	0	0	0	0	0	0	0	0	0	0	0	0	0
chr17	44083545	44083854	-	HDAC5	1	11	0	0	0	0	0	0	0	0	0	0	0	0	0	0	0	0	0	0	0	0	0	0	0.0206962	0	0	0	0	0	0	0	0	0	0	0	0	0	0	0.00773231	0	0	0	0	0
chr17	44084555	44085155	-	HDAC5	1	1	0	0	0	0	0	0	0	0	0	0	0	0	0	0	0	0	0	0	0	0	0	0	0	0	0	0	0	0	0	0	0	0	0	0	0	0	0	0	0	0	0.0191802	0	0
chr17	44084555	44087696	-	HDAC5	1	87	0.0531941	0.018373	0.0622892	0	0.0251472	0.026913	0.0522461	0.0113022	0	0.0162073	0.0225478	0	0	0.0435666	0	0	0.0104998	0	0	0.0177355	0.0421765	0	0.0103481	0	0	0.0128174	0.0169561	0.0446905	0.0456055	0.0209643	0.0204954	0.0255745	0	0.0197506	0.0564602	0.0523225	0.0590688	0.0154646	0.0656535	0.022912	0	0.00800603	0.015239
chr17	44086572	44088598	-	HDAC5	1	3	0	0	0	0	0	0	0	0	0	0	0	0	0	0	0	0	0	0	0	0	0	0	0	0	0	0	0	0	0	0	0	0	0	0	0	0	0	0	0	0	0	0.00800603	0
chr17	44405921	44474903	-	GPATCH8	1	1	0	0	0	0	0	0	0	0	0	0	0	0	0	0	0	0	0	0	0	0	0	0	0	0	0	0	0	0	0	0	0	0	0	0	0	0	0	0	0	0	0	0	0
chr17	44424349	44438715	-	GPATCH8	1	2	0	0	0	0	0	0	0	0	0	0	0	0	0	0	0	0	0	0	0	0	0	0	0	0	0	0	0	0	0	0	0	0	0	0	0	0	0	0.00773231	0	0	0	0	0
chr17	44424349	44474903	-	GPATCH8	1	4	0	0	0	0	0	0	0	0	0	0	0	0	0	0.0145222	0	0	0	0	0	0	0	0	0	0	0	0	0	0	0	0	0	0	0	0	0	0	0	0	0	0	0	0	0
chr17	44464472	44474903	-	GPATCH8	1	1	0	0	0	0	0	0	0	0	0	0	0	0	0	0	0	0	0	0	0	0	0.0105441	0	0	0	0	0	0	0	0	0	0	0	0	0	0	0	0	0	0	0	0	0	0
chr10	73299605	73345244	-	CFAP70	1	3	0	0	0	0	0	0	0	0	0	0	0	0	0	0	0	0	0	0	0	0	0	0	0	0	0	0	0	0	0	0	0	0	0	0	0	0	0	0	0	0	0	0.00800603	0
chr1	74463550	74249459	+	FPGT-TNNI3K,TNNI3K	1	4	0	0	0	0	0	0	0	0	0	0	0	0	0	0.0290444	0	0	0	0	0	0	0	0	0	0	0	0	0	0	0	0	0	0	0	0	0	0	0	0	0	0	0	0	0
chr17	44857075	44860543	-	EFTUD2	1	1	0	0	0	0	0	0	0	0	0	0	0	0	0	0	0	0	0	0	0	0	0	0	0	0	0	0.0128174	0	0	0	0	0	0	0	0	0	0	0	0	0	0	0	0	0
chr17	44911236	44911797	-	GFAP	0		0	0	0	0	0	0	0	0	0	0	0	0	0	0	0	0	0	0	0	0	0	0	0	0	0	0	0	0	0	0	0	0	0	0	0	0	0	0	0	0	0	0	0
chr1	74492266	74439490	+	FPGT-TNNI3K,TNNI3K	1	28	0	0	0	0	0	0	0	0.0113022	0	0	0	0.0411091	0	0.0145222	0.0143092	0	0	0	0	0	0.0105441	0	0	0	0	0	0	0	0.0152018	0	0	0	0	0.0197506	0	0	0.0590688	0	0.0131307	0.011456	0.0191802	0.0160121	0
chr1	74492266	74463441	+	FPGT-TNNI3K,TNNI3K	1	3	0	0	0	0	0	0	0	0	0	0	0	0	0	0	0	0	0.0104998	0	0	0	0	0	0	0	0	0	0	0	0	0	0	0	0	0	0	0	0	0	0	0	0	0	0
chr1	74492266	74489189	+	FPGT-TNNI3K,TNNI3K	1	20	0	0.018373	0	0	0.0251472	0	0	0	0	0	0	0	0	0.0145222	0	0	0	0	0	0	0	0	0	0	0	0	0	0	0	0	0.0102477	0.0255745	0.0300755	0.0790026	0.0282301	0.0348817	0	0	0	0	0	0	0.015239
chr17	45086652	45081644	+	NMT1	1	18	0	0	0	0	0	0	0	0	0	0	0	0.0274061	0	0	0.0143092	0	0	0.00937882	0	0	0	0	0	0	0	0	0.00847806	0	0	0	0	0	0	0	0.0282301	0	0	0	0	0	0	0	0
chr17	45097244	45096194	+	NMT1	1	1	0	0	0	0	0	0	0	0	0	0	0	0	0	0	0	0	0	0	0	0	0	0	0	0	0	0	0	0	0	0	0	0	0	0	0	0	0	0	0	0	0	0	0
chr17	45475100	45478147	-	PLEKHM1	1	1	0	0	0	0	0	0	0.0104492	0	0	0	0	0	0	0	0	0	0	0	0	0	0	0	0	0	0	0	0	0	0	0	0	0	0	0	0	0	0	0	0	0	0	0	0
chr1	74589631	74606902	-	ERICH3	1	1	0	0	0	0	0	0	0	0	0	0	0	0	0	0	0	0	0	0	0	0	0	0	0	0.01967	0	0	0	0	0	0	0	0	0	0	0	0	0	0	0	0	0	0	0
chr10	73299605	73348235	-	CFAP70	1	1	0	0	0	0	0	0	0	0	0	0	0	0	0	0	0	0	0	0	0	0	0	0	0	0	0	0.0128174	0	0	0	0	0	0	0	0	0	0	0	0	0	0	0	0	0
chr17	45978440	45962321	+	MAPT	1	6	0	0	0	0	0	0	0	0	0	0	0	0	0	0	0	0	0	0	0	0	0	0	0	0	0	0.0128174	0	0	0	0	0	0	0	0	0	0	0	0	0	0.005728	0	0.0160121	0
chr17	45996664	45971859	+	MAPT	1	4	0	0	0	0	0	0	0	0	0	0	0	0	0	0	0	0	0	0	0	0	0	0	0	0	0	0	0.00847806	0	0	0	0	0	0	0	0	0	0	0	0	0	0	0	0
chr17	45996664	45978375	+	MAPT	1	23	0.0132985	0	0.0311446	0	0	0	0	0	0	0.0162073	0	0	0	0	0	0	0	0	0	0.0177355	0	0	0	0	0.0143901	0	0	0	0.0152018	0.0104822	0	0.0127873	0	0	0	0.0174408	0	0	0	0	0	0.00800603	0
chr17	45996664	45987040	+	MAPT	1	10	0	0	0	0	0.0251472	0	0	0	0	0	0	0	0	0	0	0	0	0	0	0	0	0	0.0103481	0	0	0	0	0	0	0	0	0	0	0	0	0	0	0.00773231	0	0	0	0	0
chr17	46018730	45962321	+	MAPT	1	1	0	0	0	0	0	0	0	0	0	0	0	0	0	0	0	0.013398	0	0	0	0	0	0	0	0	0	0	0	0	0	0	0	0	0	0	0	0	0	0	0	0	0	0	0
chr17	46050533	46067667	-	KANSL1	1	20	0.0132985	0	0.0155723	0	0	0	0	0	0.0215419	0	0	0	0	0.0145222	0	0	0	0	0	0	0	0	0	0	0	0	0.00847806	0.0297937	0.0152018	0	0	0	0	0	0	0	0	0	0	0	0	0.0160121	0
chr17	46050533	46082542	-	KANSL1	1	8	0	0	0	0	0	0	0	0	0	0	0	0	0	0	0	0	0	0	0	0	0	0	0	0.01967	0	0	0	0.0148968	0	0	0	0	0	0	0	0	0	0	0	0	0	0	0
chr17	46050533	46094701	-	KANSL1	1	47	0	0	0.0155723	0	0	0.026913	0.0417969	0	0	0.0486218	0	0	0	0.072611	0.0143092	0	0.0104998	0.0281364	0	0.0354709	0	0	0	0	0	0.0512697	0	0	0.0304037	0.0104822	0	0.0255745	0	0.0395013	0	0.0523225	0	0	0	0.011456	0.0191802	0.0160121	0
chr17	46050533	46172232	-	KANSL1	1	1	0	0	0	0	0	0	0	0	0	0	0	0	0	0	0	0	0	0	0	0	0	0	0	0	0	0	0	0	0	0	0	0	0	0	0	0	0	0	0	0	0	0	0
chr17	46066537	46067667	-	KANSL1	1	21	0	0	0	0	0	0	0	0	0	0	0	0	0	0	0	0	0.0104998	0	0	0	0.0105441	0	0.0103481	0	0	0	0	0	0	0	0	0.0127873	0	0	0	0	0.0393792	0	0	0.011456	0	0	0
chr10	106579091	106620561	-	SORCS1	1	1	0	0	0	0	0	0	0	0	0	0	0	0	0	0	0	0	0	0.00937882	0	0	0	0	0	0	0	0	0	0	0	0	0	0	0	0	0	0	0	0	0	0	0	0	0
chr10	73310158	73312643	-	CFAP70	1	6	0	0	0	0	0	0	0	0	0	0	0	0	0	0	0	0	0	0	0	0	0.0105441	0	0	0	0.0143901	0	0	0	0	0	0	0	0	0	0	0	0	0	0	0	0	0	0
chr17	46066537	46082542	-	KANSL1	1	3	0	0	0	0	0	0	0	0	0	0	0	0	0.0195497	0	0	0	0	0	0	0	0	0	0	0	0	0	0	0	0	0	0	0	0	0	0	0	0	0	0	0	0	0	0
chr17	46066537	46094701	-	KANSL1	1	76	0	0	0	0	0	0.0358841	0	0.0226044	0.0430839	0	0	0.013703	0.0977483	0.0290444	0	0	0.0209997	0.00937882	0	0	0.0948971	0	0.0206962	0.01967	0.0287802	0.0512697	0.0847806	0.0297937	0.0456055	0.0104822	0.0307431	0.0255745	0.0300755	0	0	0.0174408	0.0590688	0.00773231	0.0262614	0.005728	0	0.0240181	0
chr17	46066537	46172232	-	KANSL1	1	2	0	0	0	0	0	0	0	0	0	0	0	0	0	0	0	0	0	0	0	0	0	0	0	0	0	0	0	0	0	0	0	0	0	0	0	0	0	0	0	0	0	0	0
chr17	46082441	46094701	-	KANSL1	1	12	0	0	0	0	0.0251472	0	0.0104492	0	0	0	0	0	0	0	0.0429277	0	0.0209997	0	0	0	0	0	0	0	0	0	0.0254342	0	0	0	0	0	0	0	0	0	0	0	0.0262614	0	0	0	0
chr17	46082441	46172232	-	KANSL1	1	6	0	0	0	0	0	0	0	0	0	0	0	0	0	0	0	0	0	0	0	0	0	0	0	0	0	0	0	0	0	0	0	0	0	0.0197506	0	0	0	0	0	0	0	0	0
chr17	46152904	46172232	-	KANSL1	1	3	0	0	0	0	0	0	0	0	0	0	0	0	0	0	0	0	0	0	0	0	0	0	0.0206962	0	0	0	0	0	0	0	0	0	0	0	0	0	0.0196896	0	0	0	0	0	0
chr17	46170855	46172232	-	KANSL1	1	54	0	0	0	0.0244509	0	0	0.0104492	0.0452088	0	0	0	0	0	0.0145222	0.0286185	0	0	0.0187576	0	0	0	0	0	0	0	0	0.0169561	0	0	0	0	0	0	0	0	0	0	0.00773231	0	0.011456	0	0.00800603	0.015239
chr17	47129393	47143982	-	CDC27	1	1	0	0	0	0	0	0	0	0	0	0	0	0	0	0	0	0	0	0	0	0	0	0	0	0	0	0	0	0.0148968	0	0	0	0	0	0	0	0	0	0	0	0	0	0	0
chr17	47129393	47172064	-	CDC27	1	52	0	0.0367461	0	0	0	0.017942	0.0208984	0.0226044	0	0	0	0	0	0.0435666	0	0	0	0.00937882	0	0	0.084353	0	0	0	0	0.0256349	0.0169561	0.0297937	0.0304037	0	0.0307431	0	0	0	0	0.0174408	0.098448	0	0	0.017184	0.0191802	0.0160121	0
chr17	47132257	47172064	-	CDC27	1	1	0	0	0	0	0	0	0	0	0	0	0	0	0	0	0	0	0	0	0	0	0	0	0	0	0	0	0	0	0	0	0	0	0	0	0	0	0	0	0	0	0	0	0
chr10	73310158	73331276	-	CFAP70	1	3	0	0	0	0	0	0	0	0	0	0	0	0	0	0	0	0	0	0	0	0	0	0	0	0	0	0	0	0	0	0	0	0	0	0	0	0	0	0	0	0	0	0	0
chr17	47345098	47326226	+	EFCAB13	1	18	0	0	0	0	0	0	0	0.0113022	0	0	0	0	0	0.0290444	0.0143092	0	0	0.00937882	0	0	0.0210882	0	0	0	0	0	0	0	0	0	0	0	0	0	0	0	0	0	0	0	0	0	0
chr17	47379253	47361378	+	EFCAB13	1	2	0	0	0	0	0	0	0	0	0	0	0	0	0	0	0	0	0	0	0	0	0	0	0	0	0	0	0	0	0	0	0	0.0127873	0	0	0	0	0	0	0	0	0	0	0
chr17	47414919	47361378	+	EFCAB13	1	2	0	0	0	0	0	0	0	0	0	0	0	0	0	0	0	0	0	0	0	0	0	0	0	0	0	0	0	0	0	0	0	0	0	0	0	0	0	0	0	0	0	0	0
chr17	47414919	47402132	+	EFCAB13	1	10	0	0	0	0	0	0	0	0	0	0.0162073	0	0	0	0	0	0	0	0	0	0	0.0105441	0	0	0	0	0	0	0	0	0	0	0	0	0	0	0	0	0	0	0	0	0.0160121	0
chr17	47601747	47596353	+	NPEPPS	1	3	0	0	0	0	0	0	0	0	0	0	0	0	0	0	0	0	0	0	0	0	0	0	0	0	0	0.0256349	0	0	0	0	0	0	0	0	0	0	0	0	0	0.005728	0	0	0
chr17	47605552	47592485	+	NPEPPS	1	1	0	0	0	0	0	0	0	0	0	0	0	0	0	0	0	0	0	0	0	0	0	0	0	0	0	0	0	0	0	0	0	0	0	0	0	0	0	0	0	0	0	0	0
chr17	47605552	47601608	+	NPEPPS	1	2	0	0	0	0	0	0	0	0	0	0	0	0	0	0	0	0	0	0	0	0	0	0	0	0	0	0	0	0	0	0.0104822	0	0	0	0	0	0	0	0	0	0	0	0	0
chr17	47613725	47596353	+	NPEPPS	1	11	0	0	0	0	0	0	0	0	0	0	0.0225478	0	0	0	0	0	0	0	0	0	0	0	0	0	0	0.0128174	0.00847806	0	0	0	0	0.0127873	0	0	0	0	0.0196896	0	0	0.011456	0	0	0
chr17	47613725	47601608	+	NPEPPS	1	5	0	0	0	0	0	0	0	0	0	0	0	0	0	0	0	0	0	0	0	0	0	0	0	0	0	0	0.00847806	0	0	0	0	0	0	0	0	0	0	0	0	0	0	0	0
chr17	47619164	47613669	+	NPEPPS	1	2	0	0	0	0	0	0	0	0	0	0	0	0	0	0	0	0	0	0	0	0	0	0	0	0	0	0	0	0	0	0	0	0	0	0	0	0	0	0	0	0	0	0	0
chr10	73310158	73345244	-	CFAP70	1	4	0	0	0	0	0	0	0	0	0	0	0	0	0	0	0	0	0	0	0	0	0	0	0	0	0	0	0	0.0148968	0	0	0.0102477	0	0	0	0	0	0	0	0	0	0	0	0
chr17	47619164	47618350	+	NPEPPS	1	45	0.0132985	0	0	0	0.0251472	0.017942	0	0.0113022	0	0	0	0	0	0	0	0.040194	0	0	0.0207708	0.0177355	0	0	0.0206962	0.01967	0	0.0256349	0.0254342	0.0148968	0.0152018	0	0.0102477	0	0	0	0	0.0174408	0.0196896	0	0	0.011456	0	0.0240181	0
chr17	47619784	47618350	+	NPEPPS	1	2	0	0	0	0	0	0	0.0104492	0	0	0	0	0	0	0	0	0	0	0	0	0	0	0	0	0	0	0	0	0	0	0	0	0	0	0	0	0	0	0	0	0	0	0	0
chr17	47668410	47663089	+	KPNB1	1	46	0	0.018373	0.0155723	0	0.0251472	0.017942	0	0	0.0430839	0	0	0	0.0195497	0.0145222	0.0143092	0	0.0104998	0	0.0207708	0	0.0421765	0	0.0206962	0.01967	0.0143901	0.0256349	0.00847806	0	0	0	0.0102477	0.0127873	0	0	0	0.0348817	0.0196896	0.00773231	0	0.017184	0	0	0
chr17	47668410	47664159	+	KPNB1	1	59	0	0	0	0.0489018	0	0	0.0104492	0.0113022	0	0	0.0225478	0.013703	0	0	0.0286185	0.026796	0.0104998	0.0187576	0	0	0.0210882	0	0	0	0	0.0128174	0	0.0297937	0.0152018	0.0209643	0	0.0127873	0	0	0	0	0	0.0231969	0	0.005728	0	0.0160121	0
chr17	47670832	47664159	+	KPNB1	1	3	0	0	0	0	0	0	0	0.0113022	0	0	0	0	0	0	0	0	0.0104998	0	0	0	0	0	0	0	0	0	0	0	0	0	0	0	0	0	0	0	0	0	0	0	0	0	0
chr17	47674782	47663089	+	KPNB1	1	5	0	0	0	0	0	0	0	0	0	0	0	0	0	0.0145222	0	0	0	0	0	0	0	0	0	0	0	0	0	0	0	0	0	0	0	0	0	0	0	0	0	0	0	0	0
chr17	47674782	47664159	+	KPNB1	1	37	0	0.018373	0	0	0	0	0.0313477	0	0	0	0	0	0	0	0.0143092	0	0.0314995	0.00937882	0	0	0.0316324	0	0.0103481	0.01967	0	0.0128174	0.0169561	0	0	0	0	0	0	0	0	0	0	0.0231969	0	0.005728	0	0.0160121	0
chr17	48032156	48033944	-	COPZ2	1	1	0	0	0	0	0	0	0	0	0	0	0	0	0	0	0.0143092	0	0	0	0	0	0	0	0	0	0	0	0	0	0	0	0	0	0	0	0	0	0	0	0	0	0	0	0
chr17	48112660	48112031	+	SNX11	1	6	0	0	0	0	0	0	0	0	0	0	0	0	0	0	0	0	0	0	0	0	0	0	0	0	0	0	0	0	0	0	0	0	0	0	0	0	0.0590688	0	0	0	0	0	0
chr17	48113401	48112031	+	SNX11	1	87	0	0	0	0.0244509	0.0251472	0.026913	0.0104492	0.0226044	0.0430839	0.0486218	0	0.013703	0.0390993	0	0.0286185	0.026796	0	0.0187576	0.0415416	0.0177355	0.0316324	0	0.0206962	0.0393401	0.0287802	0.0512697	0.0339122	0	0.0152018	0.0314465	0	0.0127873	0	0.0197506	0	0.0697634	0	0	0	0.011456	0.095901	0.0240181	0.0457169
chr10	73322963	73335524	-	CFAP70	1	1	0	0	0	0	0	0	0	0	0	0	0	0	0	0	0	0	0	0	0	0	0	0	0	0	0	0	0	0	0	0	0	0	0	0	0	0	0	0.0154646	0	0	0	0	0
chr17	48119186	48112031	+	SNX11	1	1	0	0	0	0	0	0	0	0	0	0	0	0	0	0	0	0	0	0	0	0	0	0	0	0	0	0	0	0	0	0	0	0	0	0	0	0	0	0	0	0	0	0	0
chr17	48922937	48912834	+	UBE2Z	1	1	0	0	0	0	0	0	0	0	0	0	0	0	0	0	0	0	0	0	0	0	0	0	0	0	0	0	0	0	0	0	0	0	0	0	0.0282301	0	0	0	0	0	0	0	0
chr17	49311312	49312042	-	ZNF652	1	40	0	0.018373	0	0.0244509	0	0	0.0104492	0.0226044	0	0.0162073	0	0	0	0	0	0	0	0	0	0.0177355	0.0210882	0	0	0	0.0143901	0	0.0254342	0	0	0.0104822	0	0.0127873	0	0.0395013	0	0.0174408	0	0.00773231	0	0.011456	0	0.00800603	0
chr17	49311312	49312845	-	ZNF652	1	52	0	0	0.0311446	0	0	0.017942	0.0313477	0.0226044	0.0215419	0	0.0225478	0.013703	0	0	0.0286185	0.013398	0	0.00937882	0	0.0177355	0.0527206	0	0.0103481	0	0	0.0128174	0.00847806	0.0148968	0.0152018	0.0104822	0	0	0	0.0197506	0	0.0348817	0	0	0	0.011456	0.0191802	0.00800603	0
chr17	49311312	49317983	-	ZNF652	1	23	0	0	0	0.0244509	0	0	0.0104492	0.0113022	0	0	0	0	0	0.0145222	0	0	0	0	0.0207708	0	0	0	0	0	0	0	0.0169561	0.0148968	0	0	0	0.0127873	0	0	0	0	0	0.00773231	0.0262614	0.011456	0	0.00800603	0
chr17	49719760	49720436	-	FAM117A	1	1	0	0	0	0	0	0	0	0	0	0	0	0	0	0	0	0	0	0	0	0	0	0	0	0	0	0	0	0	0	0	0	0	0	0	0	0	0	0	0	0	0	0	0
chr17	49796926	49791886	+	KAT7	1	2	0	0.018373	0	0	0	0	0	0	0	0	0	0	0	0	0	0	0	0	0	0	0	0	0	0	0	0	0	0	0	0	0	0	0	0	0	0	0	0	0	0	0	0	0
chr17	49815913	49805363	+	KAT7	1	2	0	0	0	0	0	0	0	0	0	0	0	0	0	0	0	0	0	0	0	0	0	0	0	0	0	0	0	0.0148968	0	0	0	0	0	0	0	0	0	0	0	0	0	0	0
chr17	50139263	50141373	-	PPP1R9B	1	4	0	0	0	0	0	0	0	0	0	0	0	0	0	0	0	0	0	0	0	0	0	0	0	0	0	0	0	0	0	0	0	0	0	0	0	0	0	0	0	0	0	0	0
chr17	50741246	50736960	+	LUC7L3	1	1	0	0	0	0	0	0	0	0	0	0	0	0	0	0	0	0	0	0	0	0	0	0	0	0	0	0	0	0	0	0	0	0	0	0	0	0	0	0	0	0	0	0	0
chr10	73322963	73341581	-	CFAP70	1	1	0	0	0	0	0	0	0	0	0	0	0	0	0	0	0	0	0	0	0	0	0	0	0	0	0	0	0	0	0	0	0	0	0	0	0	0	0	0	0	0	0	0	0
chr17	50741731	50736960	+	LUC7L3	1	25	0	0.018373	0	0.0244509	0	0.017942	0	0	0	0	0	0.013703	0	0	0	0.013398	0	0	0	0	0	0	0.0103481	0	0	0	0.00847806	0.0446905	0	0	0	0	0	0	0	0	0	0.00773231	0	0.005728	0	0	0
chr17	50741731	50741102	+	LUC7L3	1	26	0	0	0	0	0	0	0.0208984	0	0	0	0	0	0	0	0.0286185	0.013398	0.0104998	0	0	0	0.0210882	0	0	0	0.0287802	0	0	0.0446905	0	0	0.0102477	0	0	0	0	0	0	0	0	0	0	0	0
chr17	50744813	50736960	+	LUC7L3	1	7	0	0	0	0	0	0	0	0	0	0	0	0	0	0	0	0	0	0	0	0	0	0	0	0	0	0	0	0	0	0	0	0	0	0	0	0	0	0	0	0	0	0	0
chr17	50746702	50736960	+	LUC7L3	1	8	0	0	0	0	0	0	0	0	0	0	0	0	0	0	0	0	0	0	0	0	0	0	0	0	0	0	0	0	0	0	0	0	0	0	0	0	0	0	0.0131307	0	0	0	0
chr17	50970707	50987237	-	SPAG9	1	45	0.0132985	0	0.0155723	0	0	0	0	0	0.0430839	0	0	0.013703	0	0	0	0	0.0209997	0.0187576	0	0	0	0	0.0103481	0.01967	0.0143901	0.0256349	0.0254342	0.0297937	0	0.0209643	0.0102477	0	0	0	0	0	0	0.00773231	0	0.005728	0	0	0
chr17	50970707	50990668	-	SPAG9	1	1	0	0	0	0	0	0	0	0	0	0	0	0	0	0	0	0	0	0	0	0	0.0210882	0	0	0	0	0	0	0	0	0	0	0	0	0	0	0	0	0	0	0	0	0	0
chr17	50979746	50987237	-	SPAG9	1	13	0	0	0	0	0	0	0	0	0	0	0	0	0	0	0	0.013398	0	0	0	0	0	0	0	0	0	0.0128174	0	0	0	0.0104822	0	0	0	0	0	0	0	0	0	0	0	0	0
chr17	50979746	50989872	-	SPAG9	1	2	0	0	0	0	0	0	0	0	0	0	0	0	0	0	0	0	0	0	0	0	0	0	0	0	0.0287802	0	0	0	0	0	0	0	0	0	0	0	0	0	0	0	0	0	0
chr17	50979746	50990668	-	SPAG9	1	2	0	0	0	0	0	0	0	0.0113022	0	0	0	0	0	0	0	0	0	0	0	0	0	0	0	0	0	0	0	0	0	0	0	0	0	0	0	0	0	0	0	0	0	0	0
chr17	50979746	50995533	-	SPAG9	1	2	0	0	0	0	0	0	0	0	0	0	0	0	0	0	0	0	0	0	0	0	0.0105441	0	0	0	0	0	0	0	0	0	0	0	0	0	0	0	0	0	0	0	0	0	0
chr10	73378911	73380201	-	ANXA7	1	3	0	0	0	0	0	0	0	0	0	0	0	0	0	0	0	0	0	0	0	0	0	0	0	0	0	0.0128174	0	0	0	0	0	0	0	0	0	0	0	0	0	0	0	0	0
chr17	50982524	50984990	-	SPAG9	1	5	0	0	0	0	0	0	0	0	0	0	0	0	0	0.0290444	0	0	0	0	0	0	0	0	0	0	0	0	0	0	0	0.0209643	0	0	0	0	0	0	0	0	0	0.005728	0	0	0
chr17	50982524	50985778	-	SPAG9	1	18	0	0	0	0.0489018	0	0	0	0	0	0.0324146	0	0	0	0	0	0	0	0	0	0.0177355	0	0	0	0	0	0	0	0.0148968	0	0	0	0	0	0	0	0	0	0.00773231	0	0	0	0.0160121	0
chr17	50982524	50987237	-	SPAG9	1	25	0	0.018373	0	0	0.0251472	0	0	0	0.0215419	0	0	0	0	0	0.0286185	0	0	0	0.0207708	0	0.0210882	0	0.0310443	0	0	0	0	0	0	0	0.0102477	0.0127873	0	0	0	0	0	0	0	0	0	0	0
chr17	50982524	50990668	-	SPAG9	1	4	0	0	0	0	0	0	0	0	0	0	0	0	0	0	0	0	0	0	0	0	0	0	0	0	0	0	0	0	0	0.0104822	0	0	0	0	0	0	0	0	0	0	0	0.00800603	0
chr17	50984923	50987237	-	SPAG9	1	7	0	0	0	0	0	0	0	0	0	0	0	0	0	0	0	0	0.0104998	0	0	0	0	0.0355851	0	0	0	0	0	0	0	0	0	0	0	0	0	0	0	0.00773231	0	0	0	0.0240181	0
chr17	50989677	50993935	-	SPAG9	1	1	0	0	0	0	0	0	0	0	0	0.0162073	0	0	0	0	0	0	0	0	0	0	0	0	0	0	0	0	0	0	0	0	0	0	0	0	0	0	0	0	0	0	0	0	0
chr17	50989677	50999717	-	SPAG9	1	1	0	0	0	0	0	0	0	0	0	0	0	0	0	0	0	0	0.0104998	0	0	0	0	0	0	0	0	0	0	0	0	0	0	0	0	0	0	0	0	0	0	0	0	0	0
chr17	50990450	50993935	-	SPAG9	1	8	0	0	0	0	0	0	0	0	0	0	0	0	0	0	0	0	0.0104998	0	0	0	0	0	0.0103481	0	0	0	0	0	0	0	0	0	0	0	0	0	0	0	0	0	0	0.00800603	0
chr17	50990450	50998617	-	SPAG9	1	4	0	0	0	0	0	0	0	0	0	0	0	0	0	0	0	0	0	0.00937882	0	0	0	0	0	0	0	0	0	0	0	0	0	0	0	0	0	0.0174408	0	0	0	0	0	0	0
chr17	50998444	51001845	-	SPAG9	1	1	0	0	0	0	0	0	0	0	0	0	0	0	0	0	0	0	0	0	0	0	0	0	0	0	0	0.0128174	0	0	0	0	0	0	0	0	0	0	0	0	0	0	0	0	0
chr10	73378911	73388414	-	ANXA7	1	1	0	0	0	0	0	0	0	0	0	0	0	0	0	0	0	0	0	0	0	0	0	0	0	0	0	0.0128174	0	0	0	0	0	0	0	0	0	0	0	0	0	0	0	0	0
chr17	51005212	51021365	-	SPAG9	1	1	0	0	0	0	0	0	0	0	0	0	0	0	0	0	0	0	0	0	0	0	0	0	0	0	0	0	0	0	0	0	0	0	0	0	0	0	0	0	0	0	0	0.00800603	0
chr17	51014232	51021365	-	SPAG9	1	12	0	0	0	0.0244509	0	0	0	0	0	0	0	0	0	0	0	0	0	0	0	0	0	0	0	0	0	0	0	0	0	0	0	0	0	0	0	0	0	0	0	0.005728	0	0	0
chr17	51014232	51056482	-	SPAG9	1	3	0	0	0	0	0	0	0.0208984	0	0	0	0	0	0	0	0	0	0	0	0	0	0	0	0	0	0	0	0	0	0	0	0	0	0	0	0	0	0	0	0	0	0	0	0
chr17	51014232	51079704	-	SPAG9	1	1	0	0	0	0	0	0	0	0	0	0	0	0	0	0	0	0	0	0	0	0	0	0	0	0	0	0	0	0	0	0	0	0	0	0	0	0	0	0	0	0	0	0	0
chr17	51020159	51021365	-	SPAG9	1	3	0	0	0	0	0	0	0.0104492	0	0	0	0	0	0	0	0	0	0	0	0	0	0.0105441	0	0	0	0	0	0	0	0	0.0104822	0	0	0	0	0	0	0	0	0	0	0	0	0
chr17	51020159	51031722	-	SPAG9	1	6	0	0	0	0	0	0.00897101	0	0	0	0	0	0	0	0	0	0	0	0	0	0	0	0	0	0	0	0	0	0	0	0	0	0	0	0	0	0	0	0	0	0	0	0.00800603	0
chr17	51020159	51041651	-	SPAG9	1	2	0	0	0	0	0	0	0	0	0	0	0	0	0	0	0	0	0	0	0	0	0	0	0	0	0	0	0	0	0	0	0	0	0	0	0	0	0	0	0	0	0	0	0
chr17	51031681	51056482	-	SPAG9	1	2	0	0	0	0	0	0	0	0	0	0	0	0	0	0	0	0	0	0	0	0	0.0105441	0	0	0	0	0	0	0	0	0	0	0	0	0	0	0	0	0	0	0	0	0	0
chr17	51031681	51079704	-	SPAG9	1	1	0	0	0	0	0	0	0	0	0	0	0	0	0	0	0	0	0	0	0	0	0	0	0	0	0	0	0	0	0.0152018	0	0	0	0	0	0	0	0	0	0	0	0	0	0
chr17	51041501	51056482	-	SPAG9	1	24	0	0	0	0	0	0	0	0	0	0	0	0	0.0390993	0	0	0.013398	0	0.0187576	0	0	0	0	0.0103481	0	0	0	0.0169561	0	0	0	0	0.0255745	0	0	0.0564602	0	0.0196896	0	0	0	0	0	0
chr10	73383175	73383690	-	ANXA7	1	2	0	0	0	0	0	0	0	0	0	0	0	0.013703	0	0.0145222	0	0	0	0	0	0	0	0	0	0	0	0	0	0	0	0	0	0	0	0	0	0	0	0	0	0	0	0	0
chr17	51041501	51079704	-	SPAG9	1	21	0	0	0	0	0	0	0	0	0	0.0162073	0	0	0	0	0	0	0	0	0	0	0.0105441	0	0	0.0393401	0.0143901	0.0128174	0.00847806	0	0	0	0.0204954	0	0	0	0	0	0	0	0	0	0	0	0
chr17	51047375	51079704	-	SPAG9	1	1	0	0	0	0	0	0	0	0	0	0	0	0	0	0	0	0	0	0	0	0	0	0	0	0.01967	0	0	0	0	0	0	0	0	0	0	0	0	0	0	0	0	0	0	0
chr17	51201592	51203228	-	MBTD1	1	5	0	0	0	0	0	0	0	0	0	0	0	0	0	0	0	0	0	0	0	0	0.0210882	0	0	0	0	0	0	0	0	0	0	0	0	0	0	0	0	0	0	0	0	0.00800603	0
chr17	51201592	51203925	-	MBTD1	1	2	0	0	0	0	0	0	0	0	0	0	0	0	0	0	0	0	0	0	0	0	0	0	0	0	0	0	0.00847806	0	0	0	0	0	0	0	0	0	0	0	0	0	0	0	0
chr17	51201592	51219044	-	MBTD1	1	1	0	0	0	0	0	0	0	0	0	0	0	0	0	0	0	0	0	0	0	0	0	0	0	0	0	0	0	0	0	0	0	0	0	0	0	0	0	0	0	0	0	0	0
chr17	51201592	51225209	-	MBTD1	1	2	0	0	0	0	0	0	0	0	0	0	0	0	0.0195497	0	0	0	0	0	0	0	0	0	0	0	0	0	0	0	0	0	0	0	0	0	0	0	0	0	0	0	0	0	0
chr17	51217334	51220463	-	MBTD1	1	1	0	0	0	0	0	0	0	0	0	0	0	0	0	0	0	0	0	0	0	0	0	0	0	0	0	0	0	0	0	0	0	0	0	0	0	0	0	0	0	0	0	0	0
chr17	51217334	51225209	-	MBTD1	1	29	0	0	0.0155723	0	0	0.017942	0	0	0	0	0	0	0.0195497	0	0	0.013398	0	0	0	0	0.0105441	0	0.0103481	0	0	0.0128174	0.0169561	0.0148968	0	0.0104822	0.0204954	0.0255745	0	0	0	0.0523225	0.0393792	0	0	0	0	0.0240181	0
chr17	51218930	51225209	-	MBTD1	1	5	0	0	0	0	0	0	0	0	0	0	0	0	0	0	0	0	0	0.0187576	0	0	0	0	0	0	0	0.0128174	0	0	0	0	0	0	0	0	0	0	0	0	0	0	0	0	0
chr17	51268904	51263274	+	UTP18	1	113	0.0531941	0.0734921	0.0622892	0	0	0.0358841	0.0208984	0.0452088	0	0.0162073	0.0225478	0.0548122	0.0195497	0.0435666	0.0143092	0	0.0419994	0.0750305	0.0415416	0.0177355	0.0632647	0	0.0206962	0.15736	0.100731	0.0769046	0.0339122	0.0744842	0.0456055	0	0.0409908	0.0383618	0.0902266	0	0.0282301	0.0872042	0.196896	0.0463939	0.0787842	0.040096	0	0.0880663	0.015239
chr10	73387689	73388414	-	ANXA7	1	2	0	0	0	0	0	0	0	0	0	0	0	0	0	0	0	0	0	0	0	0	0	0	0	0	0	0	0	0	0	0	0	0	0	0	0	0	0	0	0	0	0	0	0
chr17	51268904	51266182	+	UTP18	1	1	0	0	0	0	0	0	0	0	0	0	0	0	0	0	0	0	0	0	0	0	0	0	0	0	0	0	0	0	0	0	0	0	0	0	0	0	0	0.00773231	0	0	0	0	0
chr17	51273450	51263274	+	UTP18	1	2	0	0	0	0	0	0	0	0	0	0	0	0	0	0	0	0	0	0.00937882	0	0	0	0	0	0	0	0	0	0	0	0	0	0	0	0	0	0	0	0	0	0	0	0	0
chr17	51288203	51263274	+	UTP18	1	37	0	0	0	0	0.0251472	0	0.0104492	0	0.0646258	0	0	0.0274061	0	0	0	0	0.0104998	0	0	0	0	0	0.0103481	0	0	0	0	0	0	0	0	0	0	0	0	0	0	0	0.0131307	0	0.0191802	0	0
chr17	51294045	51263274	+	UTP18	1	7	0	0	0	0	0	0	0.0104492	0	0	0	0	0	0	0	0	0	0	0	0	0	0.0105441	0	0	0	0	0	0	0	0	0	0	0	0	0	0	0	0	0	0	0	0	0	0
chr17	5215293	5209750	+	AC087500.1	1	7	0	0	0	0	0	0	0	0	0	0	0	0	0	0	0	0	0	0	0	0.0177355	0	0	0	0	0	0	0.00847806	0	0.0152018	0	0	0	0	0	0	0	0	0	0	0.005728	0	0	0
chr17	5215293	5214050	+	AC087500.1	1	1	0	0	0	0	0	0	0	0	0	0	0	0	0	0	0	0	0	0	0	0	0	0	0	0	0	0	0	0	0	0	0	0	0	0	0	0	0	0	0	0	0	0	0
chr17	5223484	5214050	+	AC087500.1	1	3	0	0	0	0	0	0	0	0	0	0	0	0	0	0	0	0	0	0	0	0	0	0	0	0	0	0	0	0	0	0	0	0	0	0	0	0	0	0	0	0	0	0	0
chr1	75251210	75339630	-	SLC44A5	1	1	0	0	0	0	0	0	0	0	0	0	0	0	0	0	0	0	0	0	0	0	0	0	0	0	0	0	0	0	0	0	0	0	0	0	0	0	0	0	0	0.005728	0	0	0
chr1	75251210	75396621	-	SLC44A5	1	1	0	0	0	0	0	0	0	0	0	0	0	0	0	0	0	0	0	0	0	0	0	0	0.0103481	0	0	0	0	0	0	0	0	0	0	0	0	0	0	0	0	0	0	0	0
chr17	5332152	5308694	+	RABEP1	1	26	0	0	0	0	0	0	0	0	0	0	0	0	0	0	0	0	0	0	0	0	0.0105441	0	0	0	0	0.0256349	0.0169561	0	0.0152018	0	0	0	0	0	0	0.0174408	0.0196896	0.0154646	0	0	0	0	0
chr10	73387689	73400857	-	ANXA7	0		0	0	0	0	0	0	0	0	0	0	0	0	0	0	0	0	0	0	0	0	0	0	0	0	0	0	0	0	0	0	0	0	0	0	0	0	0	0	0	0	0	0	0
chr17	5332152	5331949	+	RABEP1	1	9	0	0	0	0	0	0	0	0.0226044	0	0	0	0	0	0	0	0	0	0	0	0	0.0105441	0	0	0.01967	0	0	0	0	0	0.0104822	0	0	0	0	0	0	0	0	0	0	0	0.00800603	0
chr17	5346925	5308694	+	RABEP1	1	64	0	0.0367461	0	0	0	0	0.0208984	0.0226044	0	0.0162073	0.0225478	0.013703	0	0.0580888	0	0	0	0.00937882	0	0.0177355	0.0527206	0	0	0	0	0.0769046	0.0169561	0	0.0152018	0.0104822	0.0102477	0.0127873	0	0.0197506	0.0282301	0.0348817	0	0.00773231	0.0131307	0.011456	0.0191802	0.0240181	0
chr17	5346925	5331949	+	RABEP1	1	2	0	0	0	0	0	0	0	0	0	0	0	0	0	0	0	0	0	0	0	0	0	0	0	0	0	0	0	0	0	0	0	0	0	0	0	0	0	0	0	0.005728	0	0	0
chr17	5350629	5308694	+	RABEP1	1	15	0.0132985	0	0	0	0	0	0	0	0	0	0	0	0	0	0	0	0	0	0	0	0	0	0.0103481	0	0.0143901	0	0	0	0	0	0	0	0	0	0	0	0.0393792	0	0	0.005728	0	0.00800603	0
chr17	5350629	5346790	+	RABEP1	1	4	0	0.018373	0	0	0	0	0	0	0	0	0	0	0	0	0	0	0	0	0	0	0	0	0	0	0	0	0	0.0148968	0	0	0	0	0	0	0	0	0	0	0	0	0	0	0
chr17	5354490	5308694	+	RABEP1	1	17	0	0	0	0	0	0	0.0104492	0.0113022	0	0	0	0	0	0	0	0	0	0	0	0	0	0	0	0	0	0.0128174	0.00847806	0	0	0	0	0	0	0	0	0	0.0196896	0	0	0	0	0	0
chr17	5354490	5346790	+	RABEP1	1	1	0	0	0	0	0	0	0	0	0	0	0	0	0.0195497	0	0	0	0	0	0	0	0	0	0	0	0	0	0	0	0	0	0	0	0	0	0	0	0	0	0	0	0	0	0
chr17	5363016	5346790	+	RABEP1	1	5	0	0	0	0	0	0	0	0	0	0	0	0.013703	0	0	0	0	0	0	0	0	0	0	0	0	0	0	0	0.0148968	0	0	0	0	0	0	0	0	0	0	0	0	0	0	0
chr17	5363016	5350451	+	RABEP1	1	4	0	0	0	0	0	0	0	0	0	0	0	0	0	0	0	0	0	0	0	0	0	0	0	0	0	0	0	0	0	0	0	0	0	0	0	0.0174408	0	0	0	0	0	0.00800603	0
chr17	5363016	5354359	+	RABEP1	1	8	0	0	0.0155723	0	0	0	0	0	0	0	0	0	0	0.0145222	0.0143092	0	0	0	0	0	0	0	0	0	0	0	0	0	0	0	0	0	0	0	0	0	0	0	0	0	0	0	0
chr10	106579369	106620561	-	SORCS1	1	1	0	0	0	0	0	0	0	0	0	0	0	0	0	0	0	0	0	0	0	0	0	0	0	0	0	0	0	0	0	0	0	0	0	0	0	0	0	0.00773231	0	0	0	0	0
chr10	73396044	73400857	-	ANXA7	1	2	0	0	0	0	0	0	0	0	0	0	0	0	0	0	0	0	0	0	0	0	0	0	0	0	0	0	0	0	0	0	0	0	0	0	0	0	0	0	0	0	0	0	0
chr17	5365238	5346790	+	RABEP1	1	13	0	0	0	0	0	0	0	0	0	0	0	0	0	0.0145222	0	0	0	0.00937882	0	0	0	0	0	0	0	0	0.00847806	0	0	0	0	0	0	0.0197506	0	0	0	0	0	0	0.0191802	0	0
chr17	5365238	5354359	+	RABEP1	1	8	0	0	0.0155723	0	0	0	0	0	0.0215419	0	0	0	0	0	0	0	0.0104998	0	0	0	0	0	0	0	0	0	0	0	0	0	0	0	0	0	0	0	0	0	0	0	0	0	0
chr17	5368468	5338019	+	RABEP1	1	3	0	0	0	0	0	0	0	0	0	0	0	0	0	0	0	0	0	0	0	0	0	0	0	0	0	0	0	0	0	0	0	0	0	0	0	0	0	0	0	0.005728	0	0.00800603	0
chr17	5368468	5346790	+	RABEP1	1	8	0	0	0	0	0	0	0.0104492	0	0.0215419	0	0	0	0	0	0	0	0	0	0	0	0	0	0.0103481	0	0	0	0	0	0	0	0	0	0	0	0	0	0	0	0	0	0	0	0
chr17	5368468	5354359	+	RABEP1	1	26	0	0.018373	0	0	0	0	0	0.0226044	0	0	0	0	0	0.0145222	0	0.013398	0	0	0	0	0	0	0.0103481	0	0	0	0	0.0148968	0.0152018	0	0	0	0	0	0.0282301	0	0	0	0	0	0	0.00800603	0
chr17	5368468	5365122	+	RABEP1	1	20	0	0	0	0	0	0	0	0	0	0	0	0	0	0.0290444	0	0.013398	0	0	0	0	0.0210882	0	0	0	0	0	0	0	0	0	0	0.0255745	0	0.0197506	0	0	0.0196896	0	0	0	0	0.0160121	0
chr17	5373454	5346790	+	RABEP1	1	3	0	0	0	0	0	0	0	0.0113022	0	0	0	0	0	0	0	0	0	0	0	0	0	0	0	0	0	0	0	0	0	0	0	0	0	0	0	0	0	0	0	0	0	0	0
chr17	5373454	5354359	+	RABEP1	1	8	0	0	0	0	0	0.00897101	0.0104492	0	0	0	0	0	0	0	0	0	0	0	0	0	0	0	0	0	0	0	0	0	0	0.0104822	0	0	0	0	0	0.0174408	0	0	0	0	0	0	0
chr17	5377305	5338019	+	RABEP1	0		0	0	0	0	0	0	0	0	0	0	0	0	0	0	0	0	0	0	0	0	0	0	0	0	0	0	0	0	0	0	0	0	0	0	0	0	0	0	0	0	0	0	0
chr17	5377305	5373314	+	RABEP1	0		0	0	0	0	0	0	0	0	0	0	0	0	0	0	0	0	0	0	0	0	0	0	0	0	0	0	0	0	0	0	0	0	0	0	0	0	0	0	0	0	0	0	0
chr10	73454412	73479517	-	PPP3CB	1	26	0	0	0.0155723	0	0.0251472	0	0	0	0.0430839	0	0	0	0	0	0	0	0	0	0.0207708	0	0.0105441	0	0	0.01967	0	0.0128174	0	0	0	0	0	0	0	0.0197506	0	0.0174408	0	0	0	0	0	0	0
chr17	5378232	5361208	+	RABEP1	1	2	0	0	0	0	0	0	0	0	0	0	0	0	0	0	0	0	0	0	0	0	0	0	0	0	0	0	0	0	0	0	0	0	0	0	0	0	0	0	0	0	0	0.00800603	0
chr17	5404099	5416682	-	NUP88	1	3	0	0	0	0	0	0	0	0	0	0	0	0	0	0	0	0	0	0	0	0	0.0105441	0	0	0	0	0	0	0	0	0	0	0	0	0	0	0	0	0	0	0	0	0	0
chr17	5410703	5416682	-	NUP88	1	12	0	0	0	0	0	0	0	0	0	0	0	0	0	0	0.0143092	0	0	0	0	0	0.0105441	0	0.0103481	0	0	0	0	0	0.0152018	0	0	0	0	0	0	0	0	0	0	0	0	0.0160121	0
chr17	5460939	5462546	-	DHX33	1	14	0.0132985	0	0	0	0	0	0	0	0	0	0	0.013703	0	0	0	0	0	0	0	0	0	0	0	0	0	0	0	0	0	0.0104822	0	0	0	0	0	0	0.0196896	0	0	0.005728	0	0.00800603	0
chr17	5480054	5482882	-	DERL2	1	4	0	0	0.0467169	0	0	0	0	0	0	0	0	0	0	0	0	0	0	0	0	0	0	0	0	0	0	0	0	0	0	0	0	0	0	0	0	0	0	0	0	0	0	0	0
chr17	54947312	54912666	+	TOM1L1	1	27	0	0	0	0	0	0	0	0	0.0215419	0	0	0	0	0.0145222	0	0	0	0	0	0.0354709	0.0210882	0	0	0	0	0	0	0.0744842	0	0	0	0.0127873	0.0300755	0	0	0	0.0393792	0	0	0	0	0	0
chr17	54947312	54913748	+	TOM1L1	1	2	0	0	0	0	0	0	0	0	0	0	0	0	0	0.0145222	0	0	0	0	0	0	0	0	0	0	0	0	0	0	0	0	0	0	0	0	0	0	0	0	0.0131307	0	0	0	0
chr17	55000883	54990825	+	STXBP4	1	1	0	0	0	0	0	0	0	0	0	0	0	0	0	0	0	0	0	0	0	0	0.0105441	0	0	0	0	0	0	0	0	0	0	0	0	0	0	0	0	0	0	0	0	0	0
chr17	55047154	55031168	+	STXBP4	1	7	0	0	0	0	0	0	0	0	0	0	0	0	0	0	0	0	0.0104998	0	0	0.0354709	0.0105441	0	0	0	0	0	0	0	0	0	0	0	0	0.0197506	0	0	0	0	0	0	0	0	0
chr17	55073076	55007506	+	STXBP4	1	1	0	0	0.0155723	0	0	0	0	0	0	0	0	0	0	0	0	0	0	0	0	0	0	0	0	0	0	0	0	0	0	0	0	0	0	0	0	0	0	0	0	0	0	0	0
chr10	73467553	73479517	-	PPP3CB	1	9	0	0	0	0	0	0.00897101	0.0104492	0	0	0	0	0	0	0	0	0	0	0	0	0	0	0	0	0	0	0	0.0169561	0	0.0304037	0	0	0	0	0	0	0	0	0	0	0	0	0	0.015239
chr17	55073076	55031168	+	STXBP4	1	4	0	0	0	0	0	0	0	0	0	0	0	0	0	0	0	0	0	0	0	0	0	0.0177926	0	0	0	0	0	0	0	0	0	0	0	0	0	0	0	0	0	0	0	0	0
chr17	55081183	55031168	+	STXBP4	1	14	0	0	0	0	0	0	0	0	0	0	0	0	0	0	0	0.013398	0	0	0	0	0	0	0	0	0	0	0	0	0	0	0	0.0127873	0	0	0	0	0	0	0	0	0	0	0
chr17	55081183	55072900	+	STXBP4	1	3	0	0	0	0	0	0	0	0	0	0	0	0	0	0	0	0	0	0	0	0	0	0	0	0	0	0	0	0	0	0	0	0	0	0	0	0	0	0	0	0	0	0	0
chr17	55141367	55031168	+	STXBP4	1	2	0	0	0	0	0	0	0	0	0	0	0	0	0	0	0	0	0	0	0	0	0	0	0	0	0	0	0	0.0297937	0	0	0	0	0	0	0	0	0	0	0	0	0	0	0
chr17	55401469	55411417	-	MMD	1	3	0	0	0	0	0	0	0	0	0	0	0	0	0	0.0145222	0	0	0	0	0	0	0	0	0	0	0	0	0	0	0	0	0	0	0	0	0	0	0	0	0	0	0	0	0
chr17	55401469	55414232	-	MMD	1	1	0	0	0	0	0	0	0	0	0	0	0	0	0	0	0.0143092	0	0	0	0	0	0	0	0	0	0	0	0	0	0	0	0	0	0	0	0	0	0	0	0	0	0	0	0
chr17	55774859	55767335	+	PCTP	1	2	0	0	0	0	0	0	0	0	0	0	0	0	0	0	0	0	0	0	0	0	0	0	0	0	0	0	0	0	0	0	0	0	0	0	0	0	0	0	0	0	0	0	0
chr17	56814869	56825321	-	C17orf67	1	1	0	0	0	0	0	0	0	0	0	0	0	0	0	0	0	0	0.0104998	0	0	0	0	0	0	0	0	0	0	0	0	0	0	0	0	0	0	0	0	0	0	0	0	0	0
chr17	56845809	56844019	+	DGKE	1	14	0	0	0	0.0244509	0	0	0	0	0	0	0	0	0	0	0.0286185	0	0	0	0	0	0	0	0	0	0	0	0	0	0	0.0314465	0	0	0	0	0	0	0	0	0	0.011456	0	0.0320241	0
chr17	56848065	56844019	+	DGKE	1	17	0	0	0	0	0	0	0.0208984	0	0	0	0	0	0	0	0.0143092	0	0.0104998	0.00937882	0	0	0	0	0	0	0	0	0	0	0	0	0	0	0.0300755	0	0	0	0	0	0	0	0	0	0
chr10	73470687	73471613	-	PPP3CB	1	1	0	0	0	0	0	0	0	0	0	0	0	0	0	0	0	0	0	0	0	0	0	0	0	0	0	0	0	0	0	0.0104822	0	0	0	0	0	0	0	0	0	0	0	0	0
chr17	56849232	56844019	+	DGKE	1	10	0	0	0	0	0	0	0	0	0	0	0	0	0	0	0	0	0	0	0	0	0	0	0	0	0	0	0	0	0	0	0	0	0	0	0	0	0	0	0	0	0	0	0
chr17	56856625	56844019	+	DGKE	1	1	0	0	0	0	0	0	0	0	0	0	0	0	0	0	0	0	0	0	0	0	0	0	0	0	0	0.0128174	0	0	0	0	0	0	0	0	0	0	0	0	0	0	0	0	0
chr17	56856625	56847922	+	DGKE	1	4	0	0	0	0	0	0	0	0	0	0	0	0	0	0	0	0	0	0	0	0	0	0	0	0	0.0143901	0	0	0	0	0	0.0204954	0	0	0	0	0	0	0	0	0	0	0	0
chr17	56856625	56848696	+	DGKE	1	69	0	0.018373	0.0311446	0	0.0251472	0.026913	0	0.0226044	0	0	0	0.013703	0.0195497	0.0145222	0.0143092	0.040194	0	0.0281364	0	0	0.0210882	0	0.0103481	0	0	0.0128174	0.0339122	0	0	0.0104822	0	0.0383618	0	0	0.0282301	0.0174408	0.0196896	0.0154646	0	0.02864	0	0.0640482	0
chr17	56858665	56844019	+	DGKE	1	3	0	0	0	0	0	0	0	0	0	0	0	0	0	0	0	0	0	0	0	0	0.0210882	0	0	0	0	0	0	0	0	0	0	0	0	0	0	0	0	0	0	0	0	0	0
chr17	56858665	56848696	+	DGKE	1	3	0	0	0	0	0	0	0	0	0	0	0	0	0	0	0.0143092	0	0.0104998	0	0	0	0	0	0	0	0	0	0	0	0	0	0	0	0	0	0	0	0	0	0	0	0	0	0
chr17	56858665	56856512	+	DGKE	1	1	0	0	0	0	0	0	0	0	0	0	0	0	0	0	0	0	0	0	0	0	0	0	0	0	0	0	0	0	0	0	0	0	0	0	0	0.0174408	0	0	0	0	0	0	0
chr17	56862251	56844019	+	DGKE	1	2	0	0	0	0	0	0	0.0208984	0	0	0	0	0	0	0	0	0	0	0	0	0	0	0	0	0	0	0	0	0	0	0	0	0	0	0	0	0	0	0	0	0	0	0	0
chr17	56862251	56847922	+	DGKE	1	10	0	0	0	0	0	0	0	0	0	0	0	0	0	0	0	0	0	0.00937882	0	0	0	0	0	0	0	0	0.00847806	0	0	0	0	0	0	0	0	0	0	0	0	0	0	0	0
chr17	56862251	56848696	+	DGKE	1	9	0	0	0	0	0	0	0	0	0	0	0	0.013703	0	0.0145222	0	0	0	0	0	0	0.0105441	0	0	0	0	0	0	0	0	0	0	0	0	0	0	0	0	0	0	0.011456	0	0	0
chr10	73471468	73479517	-	PPP3CB	1	1	0	0	0.0155723	0	0	0	0	0	0	0	0	0	0	0	0	0	0	0	0	0	0	0	0	0	0	0	0	0	0	0	0	0	0	0	0	0	0	0	0	0	0	0	0
chr17	56901419	56904488	-	TRIM25	1	3	0	0	0	0	0	0	0	0	0	0	0	0	0	0	0	0	0	0.00937882	0	0	0	0	0	0	0	0	0	0	0	0	0	0	0	0	0	0	0	0	0	0	0	0	0
chr1	75734871	75728401	+	ACADM	1	1	0	0	0	0.0244509	0	0	0	0	0	0	0	0	0	0	0	0	0	0	0	0	0	0	0	0	0	0	0	0	0	0	0	0	0	0	0	0	0	0	0	0	0	0	0
chr1	75734871	75732644	+	ACADM	1	7	0	0	0	0	0	0	0	0	0	0	0	0	0	0	0	0	0	0	0	0	0.0105441	0	0	0	0	0	0	0	0	0	0	0	0	0	0	0	0	0	0	0	0	0	0
chr1	75740110	75728401	+	ACADM	1	6	0	0	0	0	0	0	0	0	0	0	0	0	0	0.0145222	0	0	0	0	0	0	0	0	0	0	0	0	0	0.0148968	0	0	0	0	0	0	0	0	0	0	0	0	0	0	0
chr1	75740110	75734791	+	ACADM	1	1	0	0	0	0.0244509	0	0	0	0	0	0	0	0	0	0	0	0	0	0	0	0	0	0	0	0	0	0	0	0	0	0	0	0	0	0	0	0	0	0	0	0	0	0	0
chr1	75749559	75739980	+	ACADM	1	11	0	0	0	0	0	0	0	0	0.0430839	0	0	0	0.0195497	0	0	0	0	0	0.0415416	0.0177355	0.0210882	0	0	0	0	0.0128174	0	0	0	0	0	0	0	0	0	0.0174408	0	0	0	0	0	0	0
chr1	75750546	75728401	+	ACADM	1	5	0	0	0	0	0	0	0	0	0	0	0	0	0	0	0	0	0	0	0	0	0	0	0	0	0	0	0	0	0	0	0	0	0	0	0	0	0	0	0	0	0	0	0
chr1	75750546	75732644	+	ACADM	1	12	0	0	0	0	0.0251472	0	0	0	0	0	0	0	0	0	0	0	0	0	0	0	0	0	0	0	0	0	0	0	0	0	0	0	0	0	0	0	0.0196896	0	0	0	0	0	0
chr1	75750546	75739980	+	ACADM	1	88	0.0398956	0.0918652	0.0311446	0.0244509	0	0.017942	0.0208984	0	0	0	0	0	0	0.0435666	0.0143092	0.06699	0.0209997	0.00937882	0	0.0177355	0.0421765	0.0355851	0	0.01967	0	0.0384523	0.0254342	0.104278	0.0608073	0	0	0.0127873	0.0601511	0	0.0282301	0.0348817	0.0196896	0.00773231	0	0.02864	0	0	0
chr1	75750546	75745806	+	ACADM	1	25	0	0	0	0	0	0	0	0.0113022	0	0	0	0	0	0	0	0.013398	0	0	0	0	0.0105441	0	0	0	0	0	0	0.0148968	0	0.0104822	0	0	0	0.0197506	0	0	0	0	0	0.011456	0.0191802	0.0160121	0
chr10	73474919	73479517	-	PPP3CB	1	10	0	0	0	0	0	0	0	0	0	0	0	0	0	0	0	0	0	0	0	0	0	0	0	0	0	0	0	0	0	0	0	0.0127873	0	0	0	0	0	0	0	0	0	0	0
chr1	75750891	75728401	+	ACADM	1	1	0	0	0	0	0	0	0	0	0	0	0	0.013703	0	0	0	0	0	0	0	0	0	0	0	0	0	0	0	0	0	0	0	0	0	0	0	0	0	0	0	0	0	0	0
chr17	57616084	57401379	+	MSI2	1	3	0	0	0	0	0	0	0	0	0	0	0	0	0	0	0	0	0	0	0	0	0	0	0	0	0	0	0	0	0	0.0209643	0	0	0	0	0	0	0	0	0	0	0	0	0
chr17	58210659	58213869	-	MKS1	1	1	0	0	0	0	0	0	0	0	0	0	0	0	0	0	0	0	0	0	0	0	0	0	0	0	0	0	0	0	0	0	0	0	0	0	0	0	0	0	0	0	0	0	0
chr1	75822581	75803731	+	MSH4	1	1	0	0	0	0	0	0	0	0	0	0	0	0.0274061	0	0	0	0	0	0	0	0	0	0	0	0	0	0	0	0	0	0	0	0	0	0	0	0	0	0	0	0	0	0	0
chr17	58306342	58307941	-	TSPOAP1	1	2	0	0	0	0	0	0	0	0	0	0	0	0	0	0.0145222	0	0	0	0	0	0	0	0	0	0	0	0	0	0	0	0	0	0	0	0	0	0	0	0	0	0	0	0	0
chr17	58458768	58480267	-	HSF5	1	1	0	0	0	0	0	0	0	0	0	0	0	0.013703	0	0	0	0	0	0	0	0	0	0	0	0	0	0	0	0	0	0	0	0	0	0	0	0	0	0	0	0	0	0	0
chr17	586270	601896	-	VPS53	1	2	0	0	0	0	0	0	0	0	0	0	0	0	0	0	0	0	0	0	0	0	0	0	0	0	0	0	0	0	0	0	0	0	0	0	0	0	0	0	0	0	0	0	0
chr17	586270	628231	-	VPS53	1	5	0	0	0	0	0	0	0	0	0	0	0	0	0	0	0	0	0	0	0	0.0177355	0	0	0	0	0	0.0128174	0	0	0	0	0	0	0	0	0	0	0	0	0	0	0	0	0
chr17	586270	631628	-	VPS53	1	1	0	0	0	0	0	0	0	0	0	0	0	0	0	0	0	0	0	0	0	0	0	0	0	0	0	0	0	0	0	0	0	0.0127873	0	0	0	0	0	0	0	0	0	0	0
chr17	586270	661895	-	VPS53	1	1	0	0	0	0	0	0	0	0	0	0	0	0	0	0	0	0	0	0	0	0	0	0	0	0	0	0.0128174	0	0	0	0	0	0	0	0	0	0	0	0	0	0	0	0	0
chr10	73504850	73505426	-	USP54	1	1	0	0	0	0	0	0	0	0	0	0	0	0	0	0	0	0	0	0	0	0	0	0	0	0	0	0	0.00847806	0	0	0	0	0	0	0	0	0	0	0	0	0	0	0	0
chr17	58709990	58694931	+	RAD51C	1	11	0	0	0	0	0	0	0	0	0	0	0	0	0	0	0	0	0	0	0	0	0	0	0	0	0	0	0	0	0	0	0	0	0	0	0	0	0	0	0	0.011456	0	0.0160121	0
chr17	58709990	58703196	+	RAD51C	1	2	0	0	0	0	0	0	0	0	0	0	0	0	0	0	0	0	0	0	0	0	0	0	0	0	0	0	0	0	0	0	0	0	0	0	0	0	0	0	0	0	0	0	0
chr17	58720812	58694931	+	RAD51C	1	3	0	0	0	0	0	0	0	0	0	0	0	0	0	0	0	0	0	0.0187576	0	0	0	0	0	0	0	0	0	0	0	0	0	0	0	0	0	0	0	0	0	0.005728	0	0	0
chr17	58724100	58696693	+	RAD51C	1	4	0	0	0	0	0	0	0	0	0	0	0	0	0	0	0	0	0	0	0	0	0	0	0	0	0	0	0	0	0	0	0	0	0	0	0	0	0	0	0	0	0	0	0
chr17	58965893	58955649	+	PPM1E	1	1	0	0	0	0	0	0	0	0	0	0	0	0	0	0	0	0	0	0	0	0	0	0	0	0	0	0	0	0	0	0	0	0	0	0	0	0	0	0	0	0	0	0	0
chr17	58972925	58955649	+	PPM1E	1	8	0	0	0	0	0	0	0	0	0	0	0	0	0	0	0	0	0	0	0	0	0.0105441	0	0.0206962	0	0	0	0	0.0148968	0	0	0	0	0	0	0	0	0	0	0	0.005728	0	0.00800603	0
chr17	58972925	58965694	+	PPM1E	1	4	0	0	0	0	0	0	0	0	0	0	0	0	0	0	0	0	0	0	0	0	0	0	0	0	0	0	0	0	0	0	0	0	0	0	0	0	0.0196896	0	0	0.005728	0	0	0
chr17	58972925	58969539	+	PPM1E	1	4	0	0	0	0	0	0	0	0	0	0	0	0	0	0.0145222	0	0	0	0	0	0	0	0	0	0	0	0	0	0	0	0	0	0	0	0	0	0	0	0	0	0	0	0	0
chr17	58999381	59017424	-	TRIM37	1	8	0	0	0	0	0	0	0	0	0	0	0	0	0	0	0	0	0	0	0	0	0	0	0.0103481	0	0.0287802	0	0	0.0148968	0	0	0	0	0	0	0	0	0.0196896	0	0	0.005728	0	0	0
chr17	58999381	59041898	-	TRIM37	1	1	0	0	0	0	0	0	0	0	0	0	0	0	0	0	0	0	0	0	0	0	0	0	0	0	0	0	0	0	0	0	0	0	0	0	0	0	0	0	0	0	0	0	0
chr10	73516375	73530835	-	USP54	1	2	0	0	0	0	0	0	0	0	0	0.0162073	0	0	0	0	0	0	0	0	0	0	0	0	0	0	0	0	0	0	0	0	0	0	0	0	0	0	0	0	0	0	0	0	0
chr17	58999381	59084089	-	TRIM37	1	2	0	0	0	0	0	0	0	0	0	0	0	0	0	0	0	0	0	0	0	0	0	0	0	0	0	0	0	0	0	0	0	0	0	0	0	0	0	0	0	0.005728	0	0	0
chr17	59012328	59017424	-	TRIM37	1	8	0	0	0	0	0	0	0	0	0	0	0	0	0	0	0	0	0	0	0	0	0	0	0	0	0	0	0	0.0148968	0	0	0	0	0	0	0	0	0	0	0.0131307	0	0	0.00800603	0
chr17	59012328	59070947	-	TRIM37	1	2	0	0	0	0	0	0	0.0104492	0	0	0	0	0	0	0	0	0	0	0	0	0	0	0	0	0	0	0	0	0	0	0	0	0	0	0	0	0	0	0	0	0	0	0	0
chr17	59015610	59017424	-	TRIM37	1	2	0	0	0	0	0	0	0	0	0	0	0	0.013703	0	0	0	0	0	0	0	0	0	0	0	0	0	0	0	0	0	0	0	0	0	0	0	0	0	0	0.0131307	0	0	0	0
chr17	59028415	59064405	-	TRIM37	1	1	0	0	0	0	0	0	0	0	0	0	0	0	0	0	0	0	0	0	0	0	0.0105441	0	0	0	0	0	0	0	0	0	0	0	0	0	0	0	0	0	0	0	0	0	0
chr17	59028415	59070947	-	TRIM37	1	1	0	0	0	0	0	0	0	0	0	0	0	0	0	0	0	0	0	0	0	0	0	0	0	0	0	0	0	0	0	0	0	0	0	0	0	0	0	0	0	0	0	0	0
chr17	59028415	59088407	-	TRIM37	1	1	0	0	0	0	0	0	0.0104492	0	0	0	0	0	0	0	0	0	0	0	0	0	0	0	0	0	0	0	0	0	0	0	0	0	0	0	0	0	0	0	0	0	0	0	0
chr17	59031896	59057054	-	TRIM37	1	2	0	0	0	0	0	0	0	0	0	0	0	0	0	0	0	0	0	0	0	0	0	0	0	0	0	0	0	0	0	0	0.0102477	0	0	0	0	0	0	0	0	0	0	0	0
chr17	59041813	59057054	-	TRIM37	1	17	0	0	0	0	0	0	0	0	0	0	0	0	0	0.0145222	0	0	0	0.00937882	0	0	0	0	0	0	0	0.0256349	0	0	0.0152018	0	0	0	0.0300755	0	0	0	0	0	0	0	0	0	0
chr17	59041813	59062648	-	TRIM37	1	3	0.0265971	0	0.0155723	0	0	0	0	0	0	0	0	0	0	0	0	0	0	0	0	0	0	0	0	0	0	0	0	0	0	0.0104822	0	0	0	0	0	0	0	0	0	0	0	0	0
chr10	73516375	73539593	-	USP54	1	1	0	0	0	0	0	0	0	0	0	0	0.0225478	0	0	0	0	0	0	0	0	0	0	0	0	0	0	0	0	0	0	0	0	0	0	0	0	0	0	0	0	0	0	0	0
chr17	59041813	59064405	-	TRIM37	1	1	0	0	0	0	0	0	0	0	0	0	0	0	0	0	0	0	0.0104998	0	0	0	0	0	0	0	0	0	0	0	0	0	0	0	0	0	0	0	0	0	0	0	0	0	0
chr17	59041813	59070947	-	TRIM37	1	6	0	0	0	0	0	0	0	0	0	0	0	0	0	0.0145222	0	0	0	0	0	0	0.0210882	0	0	0	0	0	0	0	0	0	0	0	0	0	0	0	0	0	0	0	0	0	0
chr17	59041813	59081219	-	TRIM37	1	2	0	0	0	0	0	0	0	0	0	0	0	0	0	0	0	0	0	0	0	0	0.0105441	0	0	0	0	0	0	0	0	0	0	0	0	0	0	0	0	0	0	0	0	0	0
chr17	59041813	59084089	-	TRIM37	1	6	0	0	0	0	0	0	0	0	0	0	0	0	0	0	0	0	0	0	0	0	0	0	0	0	0	0	0	0	0.0152018	0	0	0	0	0	0	0	0	0	0	0	0	0.00800603	0
chr17	59047683	59051328	-	TRIM37	1	1	0	0	0	0	0	0	0	0	0	0	0	0	0	0	0	0	0	0	0	0	0	0	0	0	0	0	0	0	0	0	0	0	0	0	0	0	0	0	0	0	0	0	0
chr17	59047683	59057054	-	TRIM37	1	11	0	0	0	0	0	0	0	0	0	0	0	0	0	0	0	0	0	0	0	0	0	0.0177926	0	0	0	0	0	0	0	0	0	0	0	0	0	0	0.0196896	0	0	0	0	0	0
chr17	59047683	59062648	-	TRIM37	1	2	0	0	0	0	0	0	0	0	0	0	0	0	0	0	0	0	0	0	0	0	0	0	0	0	0	0	0	0	0	0	0	0	0	0	0	0	0	0	0.0131307	0	0	0	0
chr17	59047683	59070947	-	TRIM37	1	2	0	0	0	0	0	0	0	0	0	0	0	0	0	0	0	0	0	0	0	0	0	0	0	0	0	0	0	0	0	0	0	0	0	0	0	0	0	0	0	0	0	0	0
chr17	59047683	59084089	-	TRIM37	1	7	0	0	0	0	0	0	0	0	0	0	0	0	0	0	0	0	0	0	0	0	0	0	0	0	0	0	0	0	0	0	0	0.0127873	0	0	0	0	0	0	0	0.005728	0	0	0
chr17	59047683	59088407	-	TRIM37	1	2	0	0	0	0	0	0	0	0	0	0	0	0	0	0	0	0	0	0	0	0	0	0	0	0	0	0	0	0	0	0	0	0	0	0	0	0	0	0	0	0	0	0	0
chr10	73529680	73530835	-	USP54	1	1	0	0	0	0	0	0	0	0	0	0	0	0	0	0.0145222	0	0	0	0	0	0	0	0	0	0	0	0	0	0	0	0	0	0	0	0	0	0	0	0	0	0	0	0	0
chr17	59051214	59057054	-	TRIM37	1	18	0	0	0	0	0	0	0	0	0	0	0	0	0	0	0	0	0.0104998	0	0	0.0177355	0	0	0	0	0	0	0	0	0	0	0	0	0	0	0	0	0	0.00773231	0	0	0	0.00800603	0
chr17	59051214	59075714	-	TRIM37	1	1	0	0	0	0	0	0	0	0	0	0	0	0	0	0	0	0	0	0	0	0	0	0	0	0	0	0	0	0	0	0	0	0	0	0	0	0	0	0	0	0	0	0.00800603	0
chr17	59051214	59081219	-	TRIM37	1	4	0	0	0	0	0	0	0	0	0	0	0	0	0	0	0	0	0	0	0	0	0.0105441	0	0	0	0	0	0	0	0.0152018	0	0	0	0	0	0	0	0	0	0	0	0	0	0
chr17	59051214	59084089	-	TRIM37	1	4	0	0	0	0	0	0	0	0	0	0	0	0	0	0	0	0	0	0	0	0	0	0	0	0	0	0	0	0	0	0	0	0	0	0	0	0	0	0	0	0	0	0.00800603	0
chr17	59051214	59088407	-	TRIM37	1	1	0	0	0	0	0	0	0	0	0	0	0	0	0	0	0	0	0	0	0	0	0	0	0	0	0	0	0	0	0	0	0	0	0	0	0	0	0	0	0	0	0	0	0
chr17	59056875	59070947	-	TRIM37	1	4	0	0	0	0	0	0	0	0	0	0	0	0	0	0	0	0	0	0	0	0	0	0	0	0	0	0	0	0	0	0	0	0	0	0	0	0	0	0	0	0	0	0	0
chr17	59056875	59075714	-	TRIM37	1	2	0	0	0	0	0	0	0	0.0113022	0	0	0	0	0	0	0	0	0	0	0	0	0	0	0	0	0	0	0	0	0	0	0	0	0	0	0	0	0	0	0	0	0	0	0
chr17	59056875	59079877	-	TRIM37	1	1	0	0	0	0	0	0	0	0	0	0	0	0	0	0	0	0	0	0	0	0	0	0	0	0	0	0.0128174	0	0	0	0	0	0	0	0	0	0	0	0	0	0	0	0	0
chr17	59056875	59084089	-	TRIM37	1	8	0	0	0	0	0	0	0.0104492	0.0113022	0	0	0	0	0	0	0	0	0	0	0	0	0	0	0	0	0	0	0.00847806	0	0	0	0	0.0255745	0	0	0	0	0	0	0	0	0	0	0
chr17	59056875	59088407	-	TRIM37	1	3	0	0	0	0	0	0	0	0	0	0	0	0	0	0	0	0	0	0	0	0	0	0	0	0	0	0.0128174	0	0	0	0	0	0	0	0	0	0	0	0	0	0	0	0	0
chr10	106611911	106620561	-	SORCS1	1	9	0	0	0.0155723	0	0	0	0	0	0	0	0	0	0	0	0	0	0	0	0	0	0	0.0177926	0	0	0	0	0	0	0	0	0	0.0127873	0	0	0	0	0	0	0	0	0	0	0
chr10	73529680	73539593	-	USP54	1	2	0	0	0	0	0	0	0	0	0	0	0	0	0	0	0	0	0	0	0	0	0	0	0	0	0	0	0	0	0	0	0	0	0	0	0	0	0	0	0	0.005728	0	0	0
chr17	59061032	59084089	-	TRIM37	1	1	0	0	0	0	0	0	0	0	0	0	0	0	0	0	0	0	0	0	0	0	0	0	0	0	0	0	0	0	0	0	0	0	0	0	0	0	0	0	0	0	0	0	0
chr17	59064355	59081219	-	TRIM37	1	7	0	0	0	0	0	0	0	0	0	0	0	0	0	0	0	0	0	0	0	0	0	0	0	0	0	0	0	0	0	0	0	0	0	0	0	0	0	0	0	0.005728	0	0	0
chr17	59064355	59084089	-	TRIM37	1	6	0	0.018373	0	0	0.0251472	0	0	0	0	0	0	0	0	0	0	0	0	0	0	0	0	0	0.0103481	0	0	0.0128174	0	0	0	0	0	0	0	0	0	0	0	0	0	0	0	0	0
chr17	59070823	59081219	-	TRIM37	1	5	0	0	0	0	0	0	0	0	0	0	0	0	0	0.0145222	0	0	0.0104998	0	0	0	0	0	0	0	0	0	0	0	0.0152018	0	0	0	0	0.0197506	0.0282301	0	0	0	0	0	0	0	0
chr17	59070823	59084089	-	TRIM37	1	67	0.0132985	0	0	0	0	0.00897101	0.0313477	0.0113022	0	0	0.0225478	0	0.0390993	0.0435666	0	0.026796	0.0314995	0.00937882	0.0415416	0	0.0316324	0	0	0	0.0143901	0	0.0169561	0.0595873	0.0152018	0	0	0	0	0	0	0	0.0393792	0	0.0262614	0.040096	0	0.0320241	0.030478
chr17	59070823	59091340	-	TRIM37	1	8	0	0	0	0.0244509	0	0	0	0	0	0	0	0	0	0	0	0	0	0	0	0	0	0	0	0	0	0	0	0	0	0	0	0	0	0	0	0	0	0	0	0	0.0191802	0	0
chr17	59070823	59104394	-	TRIM37	1	1	0	0	0	0	0.0251472	0	0	0	0	0	0	0	0	0	0	0	0	0	0	0	0	0	0	0	0	0	0	0	0	0	0	0	0	0	0	0	0	0	0	0	0	0	0
chr17	59075647	59081219	-	TRIM37	1	1	0	0	0	0	0	0	0	0	0	0	0	0	0	0	0	0	0	0	0	0	0	0	0	0	0	0	0.0169561	0	0	0	0	0	0	0	0	0	0	0	0	0	0	0	0
chr17	59075647	59084089	-	TRIM37	1	11	0	0	0	0	0	0	0	0	0	0	0	0	0	0	0	0	0	0	0	0	0	0	0	0	0	0	0	0	0	0	0	0	0	0	0	0	0	0	0	0.005728	0	0.0240181	0
chr17	59075647	59088407	-	TRIM37	1	1	0	0	0	0	0	0	0	0	0	0	0	0	0	0	0	0	0	0	0	0	0.0105441	0	0	0	0	0	0	0	0	0	0	0	0	0	0	0	0	0	0	0	0	0	0
chr10	73534600	73539593	-	USP54	1	5	0	0	0	0	0	0	0	0	0	0	0	0	0	0	0.0143092	0	0	0	0	0	0	0	0	0	0	0.0128174	0	0	0	0	0	0	0	0	0	0	0	0.00773231	0	0	0	0	0
chr17	59075647	59091340	-	TRIM37	1	5	0	0	0	0	0	0	0	0	0	0	0	0	0	0	0	0	0	0	0	0	0	0	0	0	0	0	0	0	0	0	0	0	0	0	0	0	0	0	0.0131307	0	0	0	0
chr17	59079754	59088407	-	TRIM37	1	4	0	0	0	0	0	0	0	0	0	0	0	0	0	0	0	0	0	0	0	0	0	0	0	0	0	0.0256349	0	0.0148968	0	0	0	0	0	0	0.0564602	0	0	0	0	0	0	0	0
chr17	59081097	59088407	-	TRIM37	1	1	0	0	0	0	0	0	0	0	0	0	0	0	0	0	0	0	0	0	0	0	0	0	0	0	0	0	0	0	0	0	0	0	0	0	0	0	0	0	0	0	0	0	0
chr17	59248785	59245414	+	GDPD1	1	7	0	0	0	0.0244509	0	0.00897101	0	0	0	0	0	0	0	0	0	0	0	0	0	0	0	0	0	0	0	0	0	0.0148968	0	0	0	0	0	0	0	0	0	0	0	0	0	0	0
chr17	59257840	59245414	+	GDPD1	1	14	0	0	0	0	0	0	0	0	0	0	0	0	0	0.0145222	0	0	0.0104998	0	0	0	0	0	0	0	0	0	0	0.0148968	0	0	0	0	0	0	0	0	0	0	0.0262614	0	0	0	0
chr17	59257840	59257122	+	GDPD1	1	1	0	0	0	0	0	0	0	0	0	0	0	0	0	0	0	0	0	0	0	0	0	0	0	0	0	0	0	0	0	0	0	0	0	0	0	0	0	0	0	0	0	0.00800603	0
chr17	59267174	59245414	+	GDPD1	1	4	0	0	0	0	0	0	0	0	0	0	0	0	0	0	0	0	0	0	0	0	0	0	0	0	0	0	0	0	0	0	0	0	0	0	0	0	0	0	0	0	0	0	0
chr17	59267174	59257122	+	GDPD1	1	6	0	0	0	0	0	0	0	0	0	0	0	0	0	0	0	0	0	0.00937882	0.0207708	0	0	0	0	0	0	0	0	0	0	0	0	0	0	0	0	0	0	0	0	0	0	0	0
chr17	59272836	59234492	+	GDPD1	1	2	0	0	0	0	0	0	0	0	0	0	0	0	0	0.0145222	0	0	0	0	0	0	0	0	0	0	0	0	0	0	0	0	0	0	0	0	0	0	0	0	0	0	0	0	0
chr17	59272836	59245414	+	GDPD1	1	4	0	0	0	0	0	0	0	0	0	0	0	0	0	0	0	0	0	0	0	0	0	0	0	0	0	0	0	0	0	0	0	0	0	0	0	0	0	0	0	0.005728	0	0	0
chr10	73536269	73539593	-	USP54	1	12	0	0	0	0	0	0	0	0	0	0	0	0	0	0	0	0	0.0104998	0	0	0	0	0	0	0	0	0	0	0	0	0	0	0	0	0	0	0	0	0	0.0262614	0.005728	0	0	0
chr17	59272836	59267041	+	GDPD1	1	1	0	0	0	0	0	0	0	0	0	0	0	0	0	0	0	0	0	0	0	0	0.0105441	0	0	0	0	0	0	0	0	0	0	0	0	0	0	0	0	0	0	0	0	0	0
chr17	59353526	59353215	+	YPEL2	1	69	0	0	0	0	0.0251472	0.017942	0	0.0113022	0.0430839	0.0162073	0.0225478	0.013703	0	0	0.0143092	0.013398	0	0	0	0	0	0.0355851	0.0103481	0.01967	0	0.0256349	0.0339122	0	0.0152018	0	0.0102477	0.0127873	0	0	0	0.0348817	0.0393792	0.00773231	0	0	0.0191802	0.0160121	0
chr17	59579879	59570518	+	DHX40	1	1	0	0	0	0	0	0	0	0	0	0	0	0	0	0	0	0	0	0	0	0	0	0	0	0	0	0	0	0	0	0	0	0.0127873	0	0	0	0	0	0	0	0	0	0	0
chr17	59648401	59644276	+	CLTC	1	1	0	0	0	0	0	0	0	0.0113022	0	0	0	0	0	0	0	0	0	0	0	0	0	0	0	0	0	0	0	0	0	0	0	0	0	0	0	0	0	0	0	0	0	0	0
chr17	59651316	59644276	+	CLTC	1	2	0	0	0	0	0	0	0	0	0	0	0	0	0	0	0	0	0	0	0	0	0	0	0	0	0	0	0	0	0	0	0	0	0	0	0	0	0	0	0	0.005728	0	0	0
chr17	59651316	59647398	+	CLTC	1	2	0	0	0	0	0	0	0	0	0	0	0	0.0274061	0	0	0	0	0	0	0	0	0.0105441	0	0	0	0	0	0	0	0	0	0	0	0	0	0	0	0	0	0	0	0	0	0
chr17	59656027	59644276	+	CLTC	1	1	0	0	0	0	0	0	0	0	0	0	0	0	0	0	0	0	0.0104998	0	0	0	0	0	0	0	0	0	0	0	0	0	0	0	0	0	0	0	0	0	0	0	0	0	0
chr17	59666977	59661443	+	CLTC	1	1	0	0	0	0	0	0	0	0	0	0	0	0	0	0	0	0	0	0	0	0	0	0	0.0103481	0	0	0	0	0	0	0	0	0	0	0	0	0	0	0	0	0	0	0	0
chr17	59682428	59681647	+	CLTC	1	1	0	0	0	0	0	0	0	0	0	0	0	0	0	0	0	0	0	0	0	0	0	0	0.0103481	0	0	0	0	0	0	0	0	0	0	0	0	0	0	0	0	0	0	0	0
chr17	59737543	59731421	+	VMP1	1	1	0	0	0	0	0	0	0	0	0	0	0	0	0	0	0	0	0	0	0	0	0	0	0	0	0	0	0	0	0	0	0	0	0	0	0	0	0	0	0	0	0	0	0
chr10	73536269	73545672	-	USP54	1	2	0	0	0	0	0	0	0	0	0	0	0	0	0	0	0	0	0	0	0	0	0.0105441	0	0	0	0	0	0	0	0	0	0	0	0	0.0197506	0	0	0	0	0	0	0	0	0
chr17	59738947	59731383	+	VMP1	1	1	0	0	0	0	0	0	0	0	0	0	0	0	0	0	0	0	0	0	0	0	0	0	0	0	0	0.0128174	0	0	0	0	0	0	0	0	0	0	0	0	0	0	0	0	0
chr17	59738947	59731421	+	VMP1	1	126	0.0398956	0.128611	0.0934339	0.0733527	0.100589	0.017942	0.0626953	0.0904177	0.10771	0.0486218	0.0676435	0.123327	0.136848	0.116178	0.143092	0.06699	0	0.0656517	0.103854	0.0354709	0.210882	0.0177926	0.0517405	0.0590101	0.0287802	0.294801	0.161083	0.0744842	0.136817	0.0419287	0.0409908	0.102298	0.0601511	0.0395013	0.11292	0.104645	0.236275	0.10052	0.0525228	0.0973761	0.172622	0.128096	0
chr17	59765138	59731421	+	VMP1	1	6	0	0	0.0155723	0	0	0	0	0	0	0	0	0	0	0	0.0143092	0	0	0	0	0	0	0	0	0	0	0	0	0	0	0	0	0	0	0	0	0	0	0	0	0	0	0	0.015239
chr17	59765138	59735338	+	VMP1	1	1	0	0	0	0	0	0	0	0	0	0	0	0	0	0	0	0	0	0	0	0	0	0	0	0	0	0	0	0	0	0	0	0	0	0	0	0	0	0	0	0	0	0	0
chr17	59773885	59731421	+	VMP1	1	133	0.0797912	0.128611	0.171295	0.0733527	0.150883	0.0986812	0.167188	0.226044	0.215419	0.0810364	0.135287	0.150733	0.175947	0.174267	0.143092	0.06699	0.146998	0.0750305	0.145396	0.141884	0.295235	0.0355851	0.21731	0.15736	0.100731	0.153809	0.169561	0.342627	0.0456055	0.136268	0.102477	0.217383	0.180453	0.0790026	0.14115	0.156968	0.275654	0.139182	0.18383	0.160384	0.210982	0.176133	0.0914339
chr17	59773885	59735338	+	VMP1	1	4	0	0	0	0	0	0	0	0	0	0	0	0	0	0	0	0	0	0	0	0	0	0	0	0	0	0	0	0	0	0	0	0	0	0	0	0	0	0	0	0	0	0.00800603	0
chr17	59773885	59737453	+	VMP1	1	8	0	0	0	0	0	0	0	0	0	0	0	0	0	0	0	0	0	0	0	0	0.0105441	0	0	0	0	0	0	0	0	0	0	0	0	0	0	0.0174408	0.0196896	0	0	0	0	0	0
chr17	59773885	59738837	+	VMP1	1	3	0	0	0	0	0	0	0	0	0	0	0	0	0	0.0145222	0	0	0	0	0	0	0	0	0	0	0	0	0	0	0	0	0.0102477	0	0	0	0	0	0	0	0	0	0	0	0
chr17	59773885	59764971	+	VMP1	1	47	0	0	0	0	0	0.00897101	0.0104492	0	0	0	0.0225478	0	0	0	0	0	0.0209997	0.00937882	0	0	0.0210882	0	0.0206962	0	0	0.0128174	0.0339122	0	0	0	0	0	0	0.0197506	0	0	0	0.0154646	0.0262614	0.011456	0	0.0160121	0
chr17	59808876	59737453	+	VMP1	1	13	0	0.018373	0	0	0	0	0	0	0.0430839	0	0	0	0	0	0	0	0	0	0	0	0	0	0	0	0	0	0	0	0	0	0	0.0127873	0	0	0	0	0	0	0	0	0	0	0
chr10	73539444	73543131	-	USP54	1	8	0	0	0	0	0	0	0	0	0	0	0	0	0	0	0	0	0	0	0	0	0	0.0177926	0.0103481	0	0	0	0	0	0	0	0	0	0	0	0	0	0	0	0	0	0	0.00800603	0
chr17	59811786	59731421	+	VMP1	1	4	0	0	0	0	0	0	0	0	0	0	0	0	0	0	0	0	0	0	0	0	0.0105441	0.0355851	0	0	0	0	0	0	0	0	0	0	0	0	0	0	0	0	0	0	0	0	0
chr17	59811786	59764971	+	VMP1	1	2	0	0	0	0	0	0	0	0	0	0	0	0	0	0	0	0	0	0	0	0	0	0	0	0	0	0	0.00847806	0	0	0	0	0	0	0	0	0	0	0	0	0	0	0	0
chr17	59817773	59731421	+	VMP1	1	22	0	0	0	0	0	0	0	0	0	0	0	0.013703	0	0	0	0.013398	0.0104998	0.00937882	0	0	0	0	0.0103481	0	0	0	0	0	0	0.0104822	0	0	0	0.0197506	0	0	0	0	0	0.005728	0	0	0
chr17	59817773	59737453	+	VMP1	1	62	0	0.0367461	0	0.0244509	0	0.026913	0	0.0226044	0	0	0.0450957	0	0	0	0.0143092	0	0	0	0.0207708	0	0.0210882	0	0	0.0393401	0.0143901	0.0640871	0.00847806	0.0148968	0.0152018	0	0	0	0	0	0.0282301	0	0	0	0.0262614	0.011456	0	0.00800603	0.015239
chr17	59817773	59764971	+	VMP1	1	14	0	0	0	0	0	0.00897101	0.0104492	0	0	0	0	0	0	0	0	0	0.0209997	0	0	0	0.0105441	0	0	0	0	0	0	0	0	0	0.0102477	0	0	0	0	0	0	0	0	0	0	0.00800603	0
chr17	59817773	59808796	+	VMP1	1	3	0	0	0	0	0	0	0	0	0	0	0	0	0	0	0	0	0	0	0	0	0	0	0	0	0	0	0	0	0	0	0	0	0	0	0	0	0	0	0	0	0	0	0
chr17	59838397	59731421	+	VMP1	1	1	0	0	0	0	0	0	0	0	0	0	0	0	0	0	0	0	0	0	0	0	0	0	0	0	0	0	0	0	0	0	0	0	0	0	0	0	0	0	0	0	0	0	0
chr17	59863664	59878334	-	TUBD1	1	1	0	0	0	0	0.0251472	0	0	0	0	0	0	0	0	0	0	0	0	0	0	0	0	0	0	0	0	0	0	0	0	0	0	0	0	0	0	0	0	0	0	0	0	0	0
chr17	59866609	59878334	-	TUBD1	1	1	0	0	0	0	0	0	0	0	0	0	0	0	0	0	0	0	0	0	0	0	0	0	0	0	0	0	0	0	0	0	0	0	0	0	0	0	0	0	0	0	0	0	0
chr17	59866609	59881110	-	TUBD1	1	1	0	0	0	0	0	0	0	0	0	0	0	0	0	0	0	0	0	0	0	0	0	0	0	0	0	0	0	0	0	0	0	0	0	0	0	0	0	0	0	0	0	0	0
chr10	73542803	73543131	-	USP54	1	5	0	0	0	0	0	0	0	0	0	0	0	0	0	0	0	0	0	0	0	0	0	0	0	0	0	0	0	0	0	0	0	0	0	0	0	0	0	0	0	0	0	0	0
chr17	59914703	59910562	+	RPS6KB1	1	23	0	0	0	0	0	0.00897101	0	0.0113022	0	0	0	0	0	0	0	0	0	0.0187576	0	0	0	0	0	0	0	0.0128174	0.00847806	0	0	0	0	0	0.0300755	0	0	0	0	0	0	0.005728	0	0	0
chr17	59926582	59910562	+	RPS6KB1	1	5	0	0	0.0155723	0	0	0	0	0	0	0	0	0	0	0	0.0143092	0	0	0	0	0	0	0	0	0	0	0	0	0	0	0	0	0	0	0	0	0	0	0	0	0	0	0	0
chr17	59926582	59912684	+	RPS6KB1	1	3	0	0	0	0	0	0	0	0	0	0	0	0	0	0	0	0	0	0	0	0	0	0	0	0	0	0	0	0	0	0	0	0	0	0	0	0	0	0	0	0	0	0.0240181	0
chr17	59936541	59910562	+	RPS6KB1	1	7	0	0	0	0	0	0	0	0	0	0	0	0	0	0	0	0	0	0	0	0	0	0	0	0	0	0	0	0	0	0	0	0	0	0	0	0.0174408	0	0	0	0	0	0	0
chr17	59936541	59935193	+	RPS6KB1	1	1	0	0	0	0	0	0	0	0	0	0	0	0	0	0	0	0	0	0	0.0207708	0	0	0	0	0	0	0	0	0	0	0	0	0	0	0	0	0	0	0	0	0	0	0	0
chr17	60066209	60067732	-	HEATR6	1	1	0	0	0	0	0	0	0	0	0	0	0	0	0	0	0	0	0	0	0	0	0	0	0	0	0	0	0	0	0	0	0	0	0	0	0	0	0	0	0	0	0	0	0
chr17	601795	632841	-	VPS53	1	2	0	0	0	0	0	0	0	0	0	0	0	0	0	0	0	0	0	0	0	0	0	0	0	0	0	0	0	0	0	0	0	0	0	0	0	0	0	0	0	0	0	0	0
chr17	601795	699380	-	VPS53	1	1	0	0	0	0	0	0	0	0	0	0	0	0	0	0	0	0	0	0	0	0	0	0	0	0	0	0	0	0	0	0	0	0	0	0	0	0	0	0	0	0	0	0	0
chr17	60219670	60226231	-	USP32	1	2	0	0	0	0	0	0	0	0	0	0	0	0	0	0	0	0	0	0	0	0	0	0	0	0	0	0	0	0	0	0	0	0	0	0	0	0	0	0	0	0	0	0	0
chr17	60236138	60271481	-	USP32	1	1	0	0	0	0	0	0	0	0	0	0	0	0	0	0	0	0	0	0	0	0	0	0	0	0	0	0	0	0	0	0	0	0	0	0	0	0	0	0	0	0	0	0	0
chr10	73545538	73576361	-	USP54	1	1	0	0	0	0	0	0	0	0	0	0	0	0	0	0	0	0	0	0	0	0	0	0	0	0	0	0	0	0	0	0	0	0	0	0	0	0	0	0	0	0	0	0	0
chr17	60252381	60301704	-	USP32	1	1	0	0	0	0	0	0	0	0	0	0	0	0	0	0	0	0	0	0	0	0	0	0	0	0	0	0	0	0	0	0	0	0	0	0	0	0	0	0	0	0	0	0	0
chr17	60255175	60271481	-	USP32	1	2	0	0	0	0	0	0	0	0	0	0	0	0	0	0	0	0	0	0	0	0	0	0	0	0	0	0	0	0	0.0152018	0	0	0	0	0	0	0	0	0	0	0	0	0	0
chr17	60255175	60288682	-	USP32	1	2	0	0	0	0	0	0.00897101	0	0	0	0	0	0	0	0	0	0	0	0	0	0	0	0	0	0	0	0	0	0	0	0	0	0	0	0	0	0	0	0	0	0	0	0	0
chr17	60265412	60271481	-	USP32	1	13	0	0	0	0	0	0	0	0.0113022	0	0	0	0	0	0	0	0	0	0	0	0	0	0	0	0	0	0	0.00847806	0	0	0	0	0	0	0	0	0	0	0.00773231	0	0	0	0.00800603	0
chr17	60265412	60288682	-	USP32	1	2	0	0	0	0	0	0	0	0	0	0	0	0	0	0	0	0	0	0	0	0	0	0	0	0	0	0	0	0	0	0	0	0	0	0	0	0	0	0	0	0	0	0	0
chr17	60265412	60294801	-	USP32	1	49	0.0132985	0	0.0155723	0.0244509	0	0	0.0104492	0.0113022	0	0	0	0.0685152	0.0390993	0	0	0.013398	0.0419994	0.0281364	0	0.0354709	0.0316324	0.0177926	0.0103481	0.01967	0.0143901	0	0	0	0.0304037	0	0.0102477	0.0127873	0	0.0197506	0	0	0.0196896	0	0.0131307	0.017184	0	0.0160121	0
chr17	60265412	60301704	-	USP32	1	1	0	0	0	0	0	0	0	0	0	0.0162073	0	0	0	0	0	0	0	0	0	0	0	0	0	0	0	0	0	0	0	0	0	0	0	0	0	0	0	0	0	0	0	0	0
chr17	60265412	60345608	-	USP32	1	1	0	0	0	0	0	0	0	0	0	0	0	0	0	0	0	0	0	0	0	0	0	0	0	0	0	0	0	0	0	0	0	0	0	0	0	0	0	0	0	0	0	0	0
chr17	60269450	60271481	-	USP32	1	11	0	0	0	0	0	0	0	0	0	0.0162073	0	0	0	0	0	0	0	0.00937882	0	0	0	0	0.0103481	0	0	0	0	0	0	0	0	0	0	0	0	0	0	0	0.0131307	0	0	0	0
chr17	60288523	60345608	-	USP32	1	5	0	0	0	0	0	0	0	0	0	0	0	0	0	0	0.0143092	0	0	0	0	0	0	0	0	0	0	0	0	0	0	0	0	0	0	0	0	0	0	0	0	0	0	0	0
chr10	73571421	73576361	-	USP54	1	21	0	0.018373	0	0	0	0	0.0104492	0.0226044	0	0	0	0	0	0.0145222	0	0	0.0104998	0	0	0	0	0	0	0	0	0	0.0169561	0	0	0	0	0	0	0	0	0	0	0	0	0.005728	0.0191802	0.00800603	0
chr17	60294683	60345608	-	USP32	1	4	0	0	0	0	0	0	0	0	0	0	0.0225478	0	0	0	0.0143092	0	0	0	0	0	0	0	0	0	0	0	0	0	0	0	0.0102477	0	0	0	0	0	0	0	0	0	0	0	0
chr17	60451880	60460787	-	APPBP2	1	1	0	0	0	0	0	0	0	0	0	0	0	0	0	0.0145222	0	0	0	0	0	0	0	0	0	0	0	0	0	0	0	0	0	0	0	0	0	0	0	0	0	0	0	0	0
chr17	60451880	60462061	-	APPBP2	1	1	0	0	0	0	0	0	0	0	0	0	0	0	0	0	0	0	0	0	0	0	0	0	0	0	0	0	0.00847806	0	0	0	0	0	0	0	0	0	0	0	0	0	0	0	0
chr17	60460663	60461915	-	APPBP2	1	3	0	0	0	0	0	0	0	0	0	0	0	0	0	0	0	0	0	0	0	0	0	0	0	0	0	0	0	0	0	0	0	0	0	0	0	0	0	0	0	0	0	0.00800603	0
chr17	60460663	60462061	-	APPBP2	1	23	0	0	0	0	0	0	0	0	0	0	0	0	0.0195497	0	0.0429277	0.026796	0	0	0	0	0	0	0	0	0	0	0	0	0	0	0	0.0127873	0	0	0	0	0	0.00773231	0	0.005728	0	0	0
chr17	60460663	60466459	-	APPBP2	1	1	0	0	0	0	0	0	0	0	0	0	0	0	0	0	0	0	0	0	0	0	0	0	0	0	0	0.0128174	0	0	0	0	0	0	0	0	0	0	0	0	0	0	0	0	0
chr17	60464021	60500487	-	APPBP2	1	1	0	0	0	0	0	0	0	0	0	0	0	0	0	0	0	0	0	0	0	0	0	0	0	0	0	0	0	0.0148968	0	0	0	0	0	0	0	0	0	0	0	0	0	0	0
chr17	60479148	60494617	-	APPBP2	1	2	0	0	0	0	0	0	0	0	0	0	0	0	0	0	0	0	0	0	0.0207708	0	0	0	0	0	0	0	0	0	0	0	0	0	0	0	0	0	0	0	0	0	0	0	0
chr17	60494466	60500487	-	APPBP2	1	4	0	0	0	0	0	0	0	0	0	0	0	0	0	0.0435666	0	0	0	0.00937882	0	0	0	0	0	0	0	0	0	0	0	0	0	0	0	0	0	0	0	0.00773231	0	0	0	0	0
chr17	60633977	60623521	+	PPM1D	1	2	0	0	0	0	0	0	0	0	0	0	0	0	0	0	0	0	0.0104998	0	0	0	0.0105441	0	0	0	0	0	0	0	0	0	0	0	0	0	0	0	0	0	0	0	0	0	0
chr10	73575512	73576361	-	USP54	1	13	0	0	0	0.0244509	0	0	0	0	0	0	0	0	0	0.0145222	0	0	0	0	0	0	0.0316324	0	0	0	0	0	0	0.0148968	0	0	0.0102477	0	0	0	0	0	0	0	0	0.011456	0	0	0
chr17	60648082	60623521	+	PPM1D	1	6	0	0	0	0	0	0	0	0	0	0	0	0	0	0	0	0	0	0	0	0	0	0	0	0	0	0	0	0	0	0	0	0	0	0	0	0	0	0	0	0.005728	0	0	0
chr17	60648082	60633853	+	PPM1D	1	3	0	0	0	0	0	0	0	0	0	0	0	0	0	0	0	0	0	0	0	0	0	0	0	0	0	0	0	0	0	0	0	0	0	0	0	0	0	0	0	0	0	0	0
chr17	60656841	60623521	+	PPM1D	1	2	0	0	0	0	0	0	0	0	0	0	0	0.013703	0	0	0	0	0	0	0	0	0	0	0	0	0	0	0	0	0	0	0	0	0	0	0	0	0	0	0	0	0	0	0
chr17	60656841	60633853	+	PPM1D	1	1	0	0.018373	0	0	0	0	0	0	0	0	0	0	0	0	0	0	0	0	0	0	0	0	0	0	0	0	0	0	0	0	0	0	0	0	0	0	0	0	0	0	0	0	0
chr17	60689761	60679453	+	BCAS3	1	6	0	0	0	0	0	0	0	0	0	0	0	0	0	0	0	0	0	0	0	0	0	0	0	0	0	0	0	0	0	0	0	0	0	0	0	0	0	0	0	0	0	0	0
chr17	60689761	60683982	+	BCAS3	1	4	0	0	0	0	0	0	0	0	0	0	0	0	0	0	0	0	0	0	0	0	0	0	0	0.01967	0	0	0	0	0	0	0	0	0	0	0	0	0	0	0	0	0	0	0
chr17	60709325	60679453	+	BCAS3	1	26	0	0	0.0311446	0	0	0	0	0	0	0	0	0	0	0	0	0	0.0104998	0	0	0	0	0	0	0	0	0	0.00847806	0	0	0.0104822	0	0	0	0	0	0	0	0	0	0	0	0	0
chr17	60709325	60683982	+	BCAS3	1	1	0	0	0	0	0	0	0	0	0	0	0	0	0	0	0	0	0	0.00937882	0	0	0	0	0	0	0	0	0	0	0	0	0	0	0	0	0	0	0	0	0	0	0	0	0
chr17	60747279	60679453	+	BCAS3	1	9	0	0	0	0	0	0	0	0	0.0215419	0	0	0	0	0.0145222	0	0	0	0	0	0	0	0	0	0	0.0143901	0	0	0	0	0	0	0	0	0	0	0	0	0	0	0.005728	0	0.00800603	0
chr17	60747279	60683982	+	BCAS3	1	1	0	0	0	0	0	0	0	0	0	0	0	0	0	0	0	0	0	0	0	0	0	0	0	0	0	0	0	0	0	0	0	0.0127873	0	0	0	0	0	0	0	0	0	0	0
chr10	7367649	7370375	-	SFMBT2	1	6	0	0	0	0	0	0	0	0	0	0.0162073	0	0	0	0	0	0	0.0104998	0	0	0	0	0	0	0	0	0	0	0	0	0	0	0	0	0	0	0	0	0	0	0.005728	0	0	0
chr17	60808076	60679453	+	BCAS3	1	1	0	0	0	0	0	0	0	0	0	0	0	0	0	0	0	0	0	0	0	0	0.0105441	0	0	0	0	0	0	0	0	0	0	0	0	0	0	0	0	0	0	0	0	0	0
chr17	60924500	60902620	+	BCAS3	1	1	0	0	0	0	0	0.00897101	0	0	0	0	0	0	0	0	0	0	0	0	0	0	0	0	0	0	0	0	0	0	0	0	0	0	0	0	0	0	0	0	0	0	0	0	0
chr17	60947352	60679453	+	BCAS3	1	1	0	0	0	0	0	0	0	0	0	0	0	0	0	0	0	0	0	0	0	0	0	0	0	0	0	0	0.00847806	0	0	0	0	0	0	0	0	0	0	0	0	0	0	0	0
chr17	60947352	60910532	+	BCAS3	1	1	0	0	0	0	0	0	0	0	0	0	0	0	0	0	0	0	0	0	0	0	0	0	0	0	0	0	0	0	0	0	0	0	0	0	0	0	0	0	0	0	0	0.00800603	0
chr17	6095223	6080371	+	WSCD1	1	4	0	0	0	0	0	0	0	0	0	0	0	0	0	0.0145222	0	0	0	0	0	0	0	0	0	0	0	0	0	0	0.0304037	0	0	0	0	0	0	0	0	0	0	0	0	0	0
chr17	6095223	6087990	+	WSCD1	1	4	0	0	0	0	0	0	0	0	0	0	0	0	0	0	0	0	0	0	0	0	0	0	0	0	0	0	0	0	0	0	0	0	0	0	0	0	0	0	0	0	0	0	0
chr17	60990235	60902620	+	BCAS3	1	1	0	0	0	0	0	0	0	0	0.0215419	0	0	0	0	0	0	0	0	0	0	0	0	0	0	0	0	0	0	0	0	0	0	0	0	0	0	0	0	0	0	0	0	0	0
chr17	61040892	61015751	+	BCAS3	1	2	0	0	0	0	0	0	0	0	0	0	0	0	0	0	0	0	0	0	0	0	0	0	0	0	0	0	0	0	0	0	0	0	0	0	0	0	0	0	0	0	0	0	0
chr17	61040892	61026866	+	BCAS3	1	3	0	0	0	0	0	0	0	0	0	0	0	0	0	0	0	0	0.0104998	0	0	0.0354709	0	0	0	0	0	0	0	0.0297937	0	0	0	0	0	0	0	0	0	0	0	0	0	0	0
chr17	61084564	60679453	+	BCAS3	1	3	0	0	0	0	0	0	0	0	0	0	0	0	0	0	0	0	0	0	0	0	0	0	0	0	0	0	0.00847806	0	0	0	0	0	0	0	0	0	0	0	0	0	0	0	0
chr10	100926019	100923975	+	SLF2	1	63	0	0.018373	0.0155723	0	0	0.00897101	0.0313477	0	0	0.0324146	0.0225478	0	0.0195497	0.0145222	0.0143092	0	0.0104998	0.00937882	0	0	0.0210882	0.0355851	0	0	0.0287802	0.0256349	0.00847806	0.0148968	0.0152018	0	0	0.0127873	0	0.0197506	0	0.0348817	0	0.0154646	0.0262614	0.017184	0	0.0240181	0.015239
chr10	106611911	106672985	-	SORCS1	1	8	0	0	0	0	0	0	0	0	0	0	0	0	0	0	0	0	0	0	0	0	0	0	0	0	0	0	0	0	0	0	0	0	0	0	0	0	0	0	0	0.005728	0	0	0
chr10	7367649	7381949	-	SFMBT2	1	21	0	0	0	0	0	0.00897101	0	0	0.129252	0	0	0	0	0	0	0	0	0	0	0	0	0	0	0	0	0	0	0	0	0.0104822	0	0	0	0	0	0	0.0196896	0.0154646	0	0	0	0	0
chr17	61084564	61026866	+	BCAS3	1	4	0	0	0	0	0	0	0	0	0	0	0	0	0	0	0	0	0	0	0	0	0	0	0	0	0	0	0	0	0	0	0	0	0	0	0	0	0	0	0	0.005728	0	0	0
chr17	61084564	61074920	+	BCAS3	1	31	0	0	0	0	0	0	0	0	0	0	0	0	0	0	0.0143092	0.013398	0	0.00937882	0	0	0	0	0	0.01967	0	0.0384523	0.0169561	0	0	0	0	0	0	0	0	0	0	0	0	0	0	0.00800603	0.030478
chr17	61368494	60679453	+	BCAS3	1	1	0	0	0	0	0	0	0	0	0	0	0	0	0	0	0	0	0	0	0	0	0	0	0	0	0	0	0	0	0	0	0	0	0	0	0	0	0	0	0	0	0	0	0
chr17	61884901	61919513	-	INTS2	1	1	0	0	0	0	0	0	0	0	0	0	0	0	0	0	0	0	0	0	0	0	0	0	0	0	0	0	0	0	0	0	0	0	0.0601511	0	0	0	0	0	0	0	0	0	0
chr17	61889786	61891689	-	INTS2	1	1	0	0	0	0	0	0	0	0	0	0	0	0	0	0	0	0	0	0	0	0	0	0	0	0	0	0	0	0	0	0	0	0	0	0	0	0	0	0	0	0	0	0	0
chr17	61889786	61904585	-	INTS2	1	1	0	0	0	0	0	0	0	0	0	0	0	0	0	0	0	0	0	0	0	0	0	0	0	0	0	0	0	0	0	0.0209643	0	0	0	0	0	0	0	0	0	0	0	0	0
chr17	61893765	61904585	-	INTS2	0		0	0	0	0	0	0	0	0	0	0	0	0	0	0	0	0	0	0	0	0	0	0	0	0	0	0	0	0	0	0	0	0	0	0	0	0	0	0	0	0	0	0	0
chr17	61904460	61919513	-	INTS2	1	4	0	0	0	0	0	0	0	0	0	0	0	0	0	0	0	0	0	0	0	0	0	0	0	0	0	0.0128174	0.00847806	0	0	0	0	0	0	0	0	0	0	0	0	0	0	0	0
chr17	61911520	61925099	-	INTS2	1	5	0	0	0	0	0	0	0	0	0	0	0	0	0	0	0	0	0	0	0	0	0	0	0	0	0	0	0	0	0	0	0	0	0	0	0	0	0	0.00773231	0	0.005728	0	0	0
chr17	61919400	61925099	-	INTS2	1	10	0	0	0	0	0	0	0	0	0	0	0	0	0	0	0	0.013398	0	0.0187576	0	0	0.0105441	0	0	0	0	0	0	0	0	0	0	0	0	0	0	0	0	0.00773231	0	0	0	0	0
chr10	7370281	7381949	-	SFMBT2	1	3	0	0	0	0	0	0	0	0	0	0	0	0	0	0	0	0	0	0	0	0	0.0105441	0	0	0	0	0	0	0	0	0	0.0102477	0	0	0	0	0	0	0	0	0	0	0	0
chr17	61921725	61925099	-	INTS2	1	8	0	0	0	0	0	0	0	0	0	0	0	0	0.0195497	0	0	0	0	0	0	0	0	0	0	0	0	0	0	0	0	0	0	0	0	0	0	0	0	0	0	0	0	0	0
chr17	61960867	61962971	-	MED13	1	5	0	0	0	0	0	0	0	0	0	0	0	0	0	0	0	0	0	0	0	0	0	0	0	0	0	0	0	0.0148968	0	0	0	0	0	0	0	0	0	0	0	0	0	0	0
chr17	61960867	61972888	-	MED13	1	7	0	0	0	0	0	0	0	0	0	0	0	0	0	0	0	0	0	0	0	0	0	0	0	0	0	0	0	0	0	0	0	0	0	0.0197506	0	0	0	0	0	0	0	0	0
chr17	61960867	61985090	-	MED13	1	2	0	0	0	0	0	0	0	0	0	0	0	0	0	0	0	0	0	0	0	0	0	0	0	0	0	0	0	0	0	0	0	0	0	0	0	0	0	0	0	0	0	0	0
chr17	61965006	61968258	-	MED13	1	3	0	0	0	0	0	0	0	0	0.0430839	0	0	0	0	0	0	0	0	0	0	0	0	0	0	0	0	0	0	0	0	0	0	0	0	0	0	0	0	0	0	0	0	0	0
chr17	61965006	61972888	-	MED13	1	2	0	0	0.0155723	0	0	0	0	0	0	0	0	0	0	0	0	0	0	0	0	0	0	0	0	0	0	0	0	0	0	0	0	0	0	0	0	0	0	0	0	0	0	0	0
chr17	61972727	61983114	-	MED13	1	2	0	0	0	0	0	0	0	0	0	0	0	0	0	0	0	0	0	0	0	0	0.0105441	0	0	0	0	0	0	0	0	0	0	0	0	0	0	0	0	0	0	0	0	0.00800603	0
chr17	61972727	61985090	-	MED13	1	1	0	0	0	0	0	0	0	0	0	0	0	0	0	0	0	0	0	0	0	0	0	0	0	0	0	0	0	0	0	0	0	0	0	0	0.0282301	0	0	0	0	0	0	0	0
chr17	61982198	61983114	-	MED13	1	1	0	0	0	0	0	0	0	0	0	0	0	0	0	0	0	0	0	0	0	0	0	0	0	0	0	0	0	0	0	0	0	0	0	0	0	0	0	0	0	0	0	0	0
chr17	61982198	61985090	-	MED13	1	3	0	0	0	0	0	0	0	0	0	0	0	0	0	0	0	0	0	0	0	0	0	0	0	0	0	0	0.00847806	0	0	0	0	0	0	0	0	0	0	0	0	0	0	0	0
chr10	73817023	73824084	-	CAMK2G	1	35	0	0	0	0	0.0251472	0.00897101	0	0.0113022	0	0	0	0.0274061	0	0	0	0	0	0.00937882	0	0	0.0316324	0	0	0	0.0143901	0	0.00847806	0.0148968	0	0	0	0	0.0300755	0.0197506	0	0.0174408	0	0	0	0	0	0	0.030478
chr17	61982198	61995365	-	MED13	1	1	0	0	0	0	0	0	0	0	0	0	0	0	0	0	0	0	0	0	0	0	0	0	0	0	0	0	0	0	0	0	0	0	0	0	0	0	0	0	0	0	0	0	0
chr17	61984171	61985090	-	MED13	1	54	0	0	0	0	0.0251472	0.00897101	0.0104492	0	0	0	0	0.0274061	0	0	0	0	0.0104998	0.0281364	0.0207708	0.0177355	0.0105441	0.0177926	0.0103481	0.01967	0	0.0256349	0.00847806	0	0.0152018	0	0	0	0	0.0592519	0	0	0	0.0386616	0	0.011456	0.0191802	0	0.015239
chr17	61984171	61987128	-	MED13	1	2	0	0	0	0	0	0	0	0	0	0	0	0	0	0	0	0	0	0	0	0	0	0	0	0	0	0	0	0	0	0	0	0	0	0	0	0	0	0	0	0	0	0	0
chr17	61992540	62011233	-	MED13	1	3	0	0	0	0	0	0	0	0	0	0	0	0	0	0	0	0	0	0	0	0	0	0	0	0	0	0	0	0	0	0	0	0	0	0	0	0	0	0	0	0	0	0	0
chr17	62010550	62033984	-	MED13	1	1	0	0	0	0	0	0	0	0	0	0	0	0	0	0.0145222	0	0	0	0	0	0	0	0	0	0	0	0	0	0	0	0	0	0	0	0	0	0	0	0	0	0	0	0	0
chr17	62010550	62035608	-	MED13	1	20	0.0132985	0	0	0	0	0.017942	0	0	0	0	0	0	0	0	0.0143092	0	0	0	0	0	0	0	0	0	0	0	0	0	0	0.0104822	0	0	0	0	0	0	0	0	0.0131307	0	0	0.0160121	0
chr17	62010550	62052705	-	MED13	1	3	0	0	0	0	0	0	0	0.0113022	0	0	0	0	0	0	0	0	0	0	0	0	0	0	0	0	0	0	0	0	0	0	0	0	0	0	0	0	0	0	0	0	0	0	0
chr17	62010550	62063301	-	MED13	1	13	0.0132985	0	0	0	0	0	0	0	0.0646258	0	0	0	0	0.0145222	0	0	0	0	0.0207708	0	0.0105441	0	0.0103481	0	0	0	0	0	0	0	0	0	0	0	0	0	0	0	0	0	0	0	0
chr17	62029541	62035608	-	MED13	1	25	0	0	0.0155723	0	0	0	0.0104492	0.0113022	0	0	0	0	0	0	0	0.013398	0.0104998	0	0	0	0	0	0.0103481	0	0	0.0128174	0	0.0148968	0	0.0209643	0	0.0127873	0	0	0	0	0	0.00773231	0.0131307	0	0	0.00800603	0
chr17	62029541	62063301	-	MED13	1	1	0	0	0	0	0	0	0	0	0	0	0	0	0	0	0	0	0	0	0	0	0	0	0	0	0	0	0	0	0	0	0	0	0	0	0	0	0	0.00773231	0	0	0	0	0
chr10	73819532	73824084	-	CAMK2G	1	17	0	0	0	0	0	0	0	0	0	0	0	0	0	0	0	0	0	0	0.0207708	0	0.0210882	0	0	0	0	0	0	0	0	0.0104822	0	0	0	0	0	0.0174408	0	0	0	0	0	0	0
chr17	62033787	62035608	-	MED13	1	48	0	0.018373	0.0311446	0.0244509	0	0	0.0104492	0.0226044	0	0	0.0225478	0	0	0.0145222	0	0.013398	0.0209997	0	0	0.0354709	0.0105441	0	0.0206962	0.0393401	0.0143901	0	0.00847806	0.0148968	0	0	0	0.0127873	0	0	0.0282301	0	0	0.00773231	0	0	0	0.00800603	0
chr17	623533	627316	-	VPS53	1	46	0	0	0.0155723	0	0.0502943	0	0.0104492	0.0339066	0	0	0	0	0	0	0.0143092	0	0.0104998	0.00937882	0	0	0	0	0	0	0	0	0.0169561	0	0	0	0	0	0	0	0.0282301	0	0	0.00773231	0	0.005728	0	0	0
chr17	623533	628231	-	VPS53	1	3	0	0	0	0	0	0	0	0	0	0	0	0	0	0	0	0	0	0	0	0	0	0	0	0	0	0	0	0	0	0	0	0	0	0	0	0	0	0	0	0	0	0	0
chr17	623533	631628	-	VPS53	1	7	0	0	0	0	0	0	0	0	0	0	0	0	0	0	0	0	0	0	0	0	0	0	0	0	0	0	0.00847806	0	0	0	0	0	0	0	0	0	0.0196896	0	0	0.011456	0	0.00800603	0
chr17	623533	661895	-	VPS53	1	5	0	0	0	0	0	0	0	0.0113022	0	0	0	0	0	0	0	0	0	0.00937882	0	0	0	0	0	0	0	0	0	0	0	0	0	0	0	0	0	0	0	0	0	0	0	0.00800603	0
chr17	623533	710613	-	VPS53	1	3	0	0	0	0	0	0	0	0	0	0	0	0	0	0	0	0	0	0	0	0	0	0	0	0	0	0	0	0	0	0	0	0	0	0	0	0	0	0.00773231	0	0	0	0	0
chr17	63099357	63073943	+	TANC2	1	14	0	0	0	0	0	0	0	0.0113022	0	0	0	0	0	0.0145222	0	0.013398	0	0	0	0	0	0	0	0	0	0.0128174	0	0	0	0	0	0	0	0	0.0282301	0	0	0	0	0	0	0	0
chr17	631550	699380	-	VPS53	1	4	0	0	0	0	0	0	0	0	0	0	0	0	0	0	0	0	0	0	0	0	0	0	0	0	0	0	0	0	0	0.0104822	0	0	0	0.0197506	0	0	0	0.00773231	0	0	0	0	0
chr17	63194139	63151270	+	TANC2	1	29	0	0	0	0	0	0	0.0104492	0.0226044	0	0	0	0	0	0	0	0	0	0.00937882	0	0	0	0	0.0103481	0	0	0	0	0	0	0	0	0	0	0.0592519	0	0	0	0	0	0	0	0.00800603	0
chr17	63200957	63099175	+	TANC2	1	2	0	0	0	0	0	0	0	0	0	0	0	0	0	0	0	0	0	0	0	0	0	0	0	0	0	0	0	0	0	0	0	0	0	0	0	0	0	0	0	0	0	0	0
chr10	73819532	73837511	-	CAMK2G	1	1	0	0	0	0	0	0	0	0	0	0	0	0	0	0	0	0	0	0	0	0	0	0	0	0	0	0	0	0	0	0	0	0	0	0	0	0	0	0	0	0	0	0	0
chr17	63200957	63151270	+	TANC2	1	101	0.0132985	0	0.0311446	0	0	0.026913	0	0.056511	0.129252	0.0162073	0.0676435	0.0411091	0.058649	0	0	0.053592	0.0419994	0.0187576	0.0415416	0	0.0527206	0	0.0517405	0	0.0287802	0.0256349	0.0254342	0.0595873	0.0456055	0.0524108	0.0512386	0.0767236	0	0	0.0564602	0.104645	0.157517	0.0309292	0.0787842	0.034368	0	0.0720542	0
chr17	63200957	63193991	+	TANC2	1	32	0	0.018373	0	0	0	0.00897101	0.0104492	0.0113022	0	0	0	0	0	0.0145222	0.0286185	0	0	0	0	0	0.0105441	0	0	0.01967	0	0.0256349	0.00847806	0.0148968	0	0	0	0	0.0300755	0	0	0	0	0	0	0	0	0	0
chr17	63238077	63073943	+	TANC2	1	4	0	0	0	0	0	0	0	0	0	0	0	0	0	0	0	0	0	0	0	0	0	0	0	0	0	0	0	0	0	0	0	0	0	0	0	0	0	0	0.0131307	0	0	0	0
chr17	63238077	63151270	+	TANC2	1	76	0.0265971	0.0367461	0.0467169	0	0	0	0.0313477	0.0113022	0	0	0.0225478	0.013703	0.0390993	0.0145222	0.0143092	0	0.0104998	0.0187576	0.0207708	0.0354709	0.0105441	0	0.0206962	0.01967	0	0.0384523	0.0169561	0.0148968	0	0	0.0102477	0.0127873	0.0300755	0.0395013	0	0	0.0393792	0.0309292	0	0.02864	0	0	0
chr17	63238077	63193991	+	TANC2	1	8	0	0	0	0	0	0	0	0.0113022	0	0	0.0225478	0	0	0	0	0	0	0	0	0	0	0	0	0	0	0	0	0	0	0	0	0	0	0	0	0	0	0	0	0	0	0.00800603	0
chr17	63267873	63151270	+	TANC2	1	25	0	0	0	0	0	0	0	0	0	0.0162073	0	0	0	0.0290444	0	0.013398	0	0.0187576	0	0	0	0.0177926	0.0103481	0	0	0	0	0	0.0304037	0	0.0102477	0	0	0	0	0.0523225	0	0	0.0131307	0	0.0191802	0.00800603	0
chr17	63319090	63314388	+	TANC2	1	1	0	0	0	0	0	0	0	0	0	0	0	0	0	0	0	0	0	0	0	0	0.0105441	0	0	0	0	0	0	0	0	0	0	0	0	0	0	0	0	0	0	0	0	0	0
chr17	63579943	63578470	+	DCAF7	1	16	0	0	0	0	0	0.00897101	0	0	0	0	0	0	0	0.0145222	0	0	0	0	0	0	0	0	0	0	0	0	0.0169561	0	0	0	0	0	0	0	0	0	0	0	0	0.011456	0	0	0
chr17	63583711	63578470	+	DCAF7	1	1	0	0	0	0	0	0	0	0	0.0215419	0	0	0	0	0	0	0	0	0	0	0	0	0	0	0	0	0	0	0	0	0	0	0	0	0	0	0	0	0	0	0	0	0	0
chr17	63585328	63578470	+	DCAF7	1	1	0	0	0	0	0	0	0	0	0	0	0	0	0	0	0	0	0	0	0	0	0	0	0	0	0	0	0	0	0	0	0	0	0	0	0	0	0	0	0	0	0	0	0
chr10	74074903	74070670	+	VCL	1	2	0	0	0	0	0	0	0	0	0	0	0	0	0	0.0145222	0	0	0	0	0	0	0	0	0	0	0	0	0	0	0	0	0	0	0	0	0	0	0	0	0	0	0	0.00800603	0
chr17	63657907	63646034	+	MAP3K3	1	1	0	0	0	0	0	0	0	0	0	0	0	0	0	0.0145222	0	0	0	0	0	0	0	0	0	0	0	0	0	0	0	0	0	0	0	0	0	0	0	0	0	0	0	0	0
chr17	63667060	63646034	+	MAP3K3	1	5	0	0	0	0	0	0	0	0	0	0	0	0.013703	0	0	0	0	0.0104998	0	0	0	0	0	0	0	0	0	0	0	0	0	0	0	0	0	0	0	0.0196896	0	0	0	0	0	0
chr17	63681899	63652557	+	MAP3K3	1	1	0	0	0	0	0	0	0	0	0	0	0	0	0	0	0	0	0	0	0	0	0	0	0	0	0	0	0	0	0	0	0	0	0	0	0	0	0	0	0	0	0	0	0
chr17	63751940	63752799	-	CCDC47	1	1	0	0	0	0	0	0	0	0	0	0	0	0	0	0	0	0	0	0	0	0	0	0	0	0	0	0	0	0	0	0	0	0	0	0	0	0	0	0	0.0131307	0	0	0	0
chr17	63760914	63764847	-	CCDC47	1	2	0	0	0	0	0	0	0	0	0	0	0	0	0	0	0	0	0	0	0	0	0	0	0.0103481	0	0	0	0	0	0	0	0	0	0	0	0	0	0	0	0	0	0	0	0
chr17	63760914	63766194	-	CCDC47	1	20	0	0	0	0	0.0251472	0.017942	0.0104492	0.0113022	0	0	0	0	0	0	0	0	0	0.00937882	0	0	0	0	0	0	0	0	0.00847806	0	0	0	0	0	0	0.0197506	0	0	0.0196896	0	0	0	0	0.00800603	0
chr17	63764016	63766194	-	CCDC47	1	13	0	0	0.0155723	0	0	0	0	0	0	0	0	0	0	0	0	0	0	0.00937882	0	0.0177355	0	0	0	0	0	0	0.00847806	0.0148968	0	0	0	0	0	0	0	0	0	0	0	0.005728	0	0.0160121	0
chr17	63800617	63792412	+	DDX42	1	2	0	0	0	0	0	0	0	0	0	0	0	0	0	0	0	0	0	0	0	0	0	0	0	0	0	0	0	0	0	0	0	0	0	0	0	0	0	0	0	0	0	0	0
chr17	63806654	63792412	+	DDX42	1	1	0	0	0	0	0	0	0	0	0	0	0	0	0	0	0	0	0	0	0	0	0	0	0	0	0.0143901	0	0	0	0	0	0	0	0	0	0	0	0	0	0	0	0	0	0
chr17	63809659	63792412	+	DDX42	1	1	0	0	0	0	0	0	0	0	0	0	0	0	0	0	0	0	0	0	0	0	0	0	0	0	0	0	0	0	0	0	0	0	0	0	0	0	0	0	0	0	0	0	0
chr10	74398579	74394141	+	ADK	1	2	0	0	0	0	0	0	0	0	0	0	0	0	0	0	0	0	0	0	0	0	0	0	0	0	0	0	0	0	0.0152018	0	0	0	0	0	0	0	0	0	0	0	0	0	0
chr17	63809659	63805071	+	DDX42	1	4	0	0	0	0	0	0	0	0	0	0	0	0	0	0	0	0	0	0	0	0	0	0	0	0	0	0	0	0	0	0	0	0	0	0	0	0	0	0	0	0	0	0	0
chr17	64052780	64053371	-	ERN1	1	2	0	0	0	0	0	0	0	0	0	0	0	0	0	0	0	0	0	0	0	0	0	0	0	0.01967	0	0	0	0	0	0	0	0	0	0	0	0	0	0	0	0	0	0	0
chr1	76412417	76313805	+	ST6GALNAC3	1	3	0	0	0	0	0	0	0	0	0	0	0	0	0	0	0	0	0	0	0	0	0	0	0	0	0	0	0	0	0.0152018	0	0	0	0	0	0	0	0	0	0	0	0	0	0
chr17	64171100	64188415	-	TEX2	1	50	0.0132985	0	0	0	0	0.017942	0	0.0113022	0	0	0.0225478	0.0274061	0.0195497	0	0	0	0.0104998	0	0	0	0	0	0.0206962	0.01967	0	0.0128174	0.00847806	0.0297937	0.0152018	0	0	0.0127873	0	0.0197506	0	0	0	0.00773231	0	0.017184	0	0	0
chr17	64171100	64188436	-	TEX2	1	8	0	0	0	0	0	0	0	0	0	0	0	0	0	0	0	0	0	0	0	0	0	0	0	0	0	0	0	0	0	0	0	0	0	0	0	0	0	0	0	0	0	0.00800603	0
chr17	64212574	64214242	-	TEX2	1	34	0.0265971	0	0	0	0	0	0.0104492	0	0	0	0	0.0274061	0	0.0145222	0.0143092	0	0	0	0.0415416	0	0.0105441	0	0	0	0	0.0128174	0.00847806	0.0297937	0	0	0	0.0127873	0	0	0.0282301	0	0	0	0	0	0	0	0
chr17	64341634	64352463	-	PECAM1	1	2	0	0	0	0	0	0	0	0	0	0	0	0	0	0	0	0	0	0	0	0	0	0	0	0	0	0	0	0	0	0	0	0	0	0	0	0	0	0	0	0	0	0	0
chr17	64502162	64504318	-	DDX5	1	1	0	0	0	0	0	0	0	0	0	0	0	0	0	0	0	0	0	0	0	0	0	0	0	0	0	0	0	0	0	0	0	0	0	0	0	0	0	0	0	0	0	0	0
chr17	64522895	64519321	+	CEP95	1	2	0	0	0	0	0	0	0	0	0	0	0	0	0	0	0	0	0	0	0	0	0	0	0	0	0	0	0	0	0	0	0	0.0127873	0	0	0	0	0	0	0	0	0	0	0
chr17	64526200	64519321	+	CEP95	1	33	0	0	0	0	0	0.00897101	0.0208984	0.0113022	0	0	0	0	0	0	0.0143092	0	0	0	0	0.0177355	0.0210882	0	0	0	0	0.0256349	0	0.0148968	0	0	0	0	0	0.0197506	0	0	0	0.00773231	0	0	0	0.0160121	0
chr10	74525426	74394141	+	ADK	1	1	0	0	0	0	0	0	0	0	0	0	0	0	0	0	0	0	0	0	0	0	0	0	0.0103481	0	0	0	0	0	0	0	0	0	0	0	0	0	0	0	0	0	0	0	0
chr17	64526200	64522702	+	CEP95	1	1	0	0	0	0	0	0	0	0	0	0	0	0	0	0	0	0	0	0	0	0	0	0	0	0	0	0	0	0	0	0	0	0	0	0	0	0	0	0	0	0	0	0	0
chr17	64529427	64519321	+	CEP95	1	2	0	0	0	0	0	0	0	0	0	0	0	0	0	0	0	0	0	0	0	0	0	0	0	0	0	0.0128174	0	0	0	0	0	0	0	0	0	0	0	0	0	0	0	0.0160121	0
chr17	64529427	64522702	+	CEP95	1	1	0	0	0	0	0	0	0	0	0	0	0	0	0	0	0	0	0	0	0	0	0	0	0	0	0	0	0	0	0	0	0	0	0	0	0	0	0	0	0	0	0	0	0
chr17	64534737	64519321	+	CEP95	1	7	0	0	0	0	0	0	0	0	0	0	0	0	0	0	0	0	0	0	0	0	0	0	0	0	0	0	0	0	0	0	0	0	0	0	0	0	0	0.00773231	0	0	0	0	0
chr17	64534737	64521402	+	CEP95	1	3	0	0	0	0	0	0	0	0	0	0	0	0	0	0	0	0	0	0	0	0	0	0	0	0	0	0	0	0	0	0	0	0	0	0	0	0	0	0.00773231	0	0	0	0	0
chr17	64534737	64531890	+	CEP95	1	1	0	0	0	0.0244509	0	0	0	0	0	0	0	0	0	0	0	0	0	0	0	0	0	0	0	0	0	0	0	0	0	0	0	0	0	0	0	0	0	0	0	0	0	0	0
chr17	64561500	64571956	-	SMURF2	1	1	0	0	0	0	0	0	0	0	0	0	0	0.013703	0	0	0	0	0	0	0	0	0	0	0	0	0	0	0	0	0	0	0	0	0	0	0	0	0	0	0	0	0	0	0
chr17	64561500	64578576	-	SMURF2	1	1	0	0	0	0	0	0	0	0	0	0	0	0	0	0	0	0	0	0	0	0	0	0	0	0	0	0	0	0	0	0	0	0	0	0	0	0	0	0.00773231	0	0	0	0	0
chr17	64571798	64583544	-	SMURF2	1	2	0	0	0	0	0	0	0	0	0	0	0	0	0	0	0	0	0	0	0	0	0	0	0	0	0	0	0.00847806	0	0	0	0	0	0	0	0	0	0	0	0	0	0	0	0
chr17	64571798	64586170	-	SMURF2	1	12	0	0	0	0	0	0	0	0	0	0	0	0	0	0	0	0	0	0	0	0	0	0	0.0103481	0	0	0	0	0	0	0.0104822	0	0	0	0	0	0	0	0	0	0	0	0.00800603	0
chr10	74600493	74394141	+	ADK	1	13	0	0	0	0	0	0	0	0.0113022	0	0	0	0	0	0	0	0	0	0	0	0	0.0105441	0	0	0	0	0	0	0	0.0152018	0	0	0	0	0	0	0	0	0	0	0	0.0383604	0.00800603	0
chr17	64571798	64591149	-	SMURF2	1	7	0	0	0	0	0	0	0	0.0113022	0	0	0	0	0	0	0	0	0	0	0	0	0.0210882	0	0	0	0	0	0	0	0.0152018	0	0	0	0	0	0	0	0	0	0	0	0	0	0
chr17	64591084	64606640	-	SMURF2	1	5	0	0	0	0	0	0	0	0	0	0	0	0	0	0	0	0	0	0	0	0	0.0105441	0	0	0	0	0	0	0	0	0	0	0	0	0	0	0	0	0	0	0	0	0	0
chr17	64754005	64762710	-	ARHGAP27P1-BPTFP1-KPNA2P3	1	1	0	0	0	0	0	0	0	0	0	0	0	0	0	0	0	0	0	0	0	0	0	0	0	0	0	0	0	0	0	0	0	0	0	0	0	0	0	0	0	0	0	0	0
chr17	65053502	65053728	-	GNA13	1	8	0	0	0	0	0	0	0	0.0226044	0	0	0	0	0	0	0.0143092	0	0.0209997	0	0	0	0	0	0	0	0	0	0	0	0	0	0	0	0	0	0	0	0	0	0	0	0	0	0
chr17	653291	661895	-	VPS53	1	5	0	0	0	0	0	0	0	0	0.0215419	0	0	0	0	0	0	0	0	0	0	0	0	0	0	0	0	0.0128174	0	0	0	0	0	0	0	0	0	0	0	0	0	0	0	0	0
chr17	653291	699380	-	VPS53	1	45	0	0	0.0467169	0	0	0.00897101	0.0104492	0	0	0	0	0	0	0	0	0	0.0314995	0.00937882	0	0	0.0105441	0	0.0310443	0	0.0143901	0	0	0.0297937	0	0	0.0204954	0	0	0	0	0.0348817	0.0196896	0	0	0.005728	0.0191802	0.0160121	0
chr17	653291	710613	-	VPS53	1	9	0	0	0	0	0.0251472	0	0	0	0	0	0	0	0	0	0.0143092	0	0	0	0	0	0	0	0	0	0	0.0128174	0	0	0	0	0	0	0	0	0	0	0	0	0	0	0	0	0
chr17	65549520	65558736	-	AC004805.1,AXIN2	1	11	0	0	0	0	0	0	0	0	0	0	0	0	0	0.0145222	0	0	0	0	0	0	0.0210882	0	0	0	0	0	0	0	0	0	0	0	0	0	0	0	0	0	0	0	0	0.00800603	0
chr17	65557806	65558736	-	AC004805.1,AXIN2	1	12	0	0	0	0	0.0251472	0	0	0	0	0	0	0	0	0	0	0	0	0	0	0	0	0	0	0	0	0	0.00847806	0	0	0	0	0	0	0	0	0	0	0	0	0.005728	0	0.00800603	0
chr17	65689129	65750724	-	CEP112	1	36	0	0	0	0	0	0.017942	0	0	0	0	0	0	0	0	0	0	0	0	0.0207708	0	0.0105441	0	0	0.01967	0	0	0	0	0	0	0	0	0	0	0	0.0174408	0	0.0154646	0	0.005728	0	0.0160121	0
chr10	74670269	74394141	+	ADK	1	1	0	0	0	0	0	0	0	0	0	0	0	0	0	0	0	0	0	0	0	0	0	0	0	0	0	0	0	0	0	0	0	0	0	0	0.0282301	0	0	0	0	0	0	0	0
chr17	65743068	65750724	-	CEP112	1	45	0.0132985	0	0.0467169	0	0	0	0.0313477	0.0113022	0	0	0	0	0	0.0290444	0.0286185	0	0.0209997	0.00937882	0	0	0.0210882	0	0	0	0.0143901	0.0256349	0	0.0297937	0.0152018	0.0104822	0	0.0383618	0	0	0	0	0.0787584	0	0	0	0	0	0
chr17	65851804	65961598	-	CEP112	1	3	0	0	0	0	0	0	0	0	0	0	0	0	0	0	0	0	0	0	0	0	0	0	0	0	0	0	0	0	0	0	0	0	0	0	0	0	0	0	0	0	0	0.00800603	0
chr17	6589779	6600458	-	KIAA0753	1	2	0	0	0	0	0	0	0	0	0	0	0	0	0	0	0	0	0	0.00937882	0	0	0	0	0	0	0	0	0	0	0	0	0	0	0	0	0	0	0	0	0	0	0	0	0
chr17	65902152	65961598	-	CEP112	1	6	0	0	0	0	0	0	0	0	0	0	0	0.013703	0	0	0	0	0	0	0	0	0	0	0	0	0.0143901	0	0.00847806	0	0	0	0	0	0	0	0	0	0	0	0	0	0	0	0
chr17	65902152	66070001	-	CEP112	1	4	0	0	0	0	0	0	0	0	0	0	0	0	0	0	0	0	0	0	0	0	0.0105441	0	0	0	0	0	0	0	0	0	0	0	0	0	0	0	0	0	0	0	0	0	0
chr17	65902152	66096632	-	CEP112	1	1	0	0	0	0	0	0	0	0	0	0	0	0	0	0	0	0	0	0	0	0	0	0	0	0	0	0	0	0	0	0	0	0	0	0	0	0	0	0	0	0	0	0	0
chr17	65961463	66070001	-	CEP112	1	4	0	0	0	0	0	0	0	0	0	0	0	0	0	0	0	0	0	0	0	0	0	0	0	0	0	0.0128174	0	0	0	0	0	0	0	0	0	0	0	0	0	0	0	0	0
chr17	65961463	66096632	-	CEP112	1	4	0	0	0	0	0	0	0	0	0	0	0	0	0	0	0	0	0	0	0	0	0	0	0	0	0	0	0	0	0	0	0	0	0	0	0	0	0	0	0	0	0	0	0
chr17	66005690	66030023	-	CEP112	1	4	0	0	0	0	0	0	0	0	0	0	0	0.013703	0	0	0	0	0	0	0	0	0	0	0	0.01967	0	0	0	0	0	0	0	0	0	0	0	0	0	0	0	0	0	0	0
chr17	66005690	66070001	-	CEP112	1	7	0	0	0	0	0	0	0	0	0	0	0	0	0	0	0	0.013398	0	0	0	0	0	0	0	0	0	0	0.00847806	0	0.0152018	0.0209643	0	0	0	0	0	0	0	0	0	0	0	0.00800603	0
chr10	106618149	106620561	-	SORCS1	1	10	0	0	0	0	0	0	0	0.0113022	0	0	0.0225478	0	0	0	0	0	0	0	0	0	0.0105441	0	0	0	0	0.0128174	0	0	0.0304037	0	0	0	0	0	0	0	0.0196896	0	0	0	0	0	0
chr10	74670269	74589282	+	ADK	1	3	0	0	0	0	0	0	0	0	0	0	0	0	0	0	0	0	0	0	0	0	0	0	0	0.01967	0	0	0.0169561	0	0	0	0	0	0	0	0	0	0	0	0	0	0	0	0
chr17	66027501	66030023	-	CEP112	1	10	0	0	0	0	0	0	0	0	0	0	0	0	0	0	0.0143092	0	0	0.00937882	0	0	0	0	0	0	0	0	0.0169561	0	0	0	0	0.0127873	0	0	0	0	0	0.00773231	0	0	0	0	0
chr17	66027501	66070001	-	CEP112	1	6	0	0	0	0	0	0	0	0	0	0	0	0	0	0	0	0	0	0	0	0	0	0	0	0	0	0	0	0	0	0	0	0.0127873	0	0	0	0	0	0	0	0.005728	0	0	0
chr17	66027501	66096632	-	CEP112	1	5	0.0132985	0	0.0155723	0	0	0	0	0	0	0	0	0	0.0195497	0	0	0	0	0	0	0	0.0105441	0	0	0	0	0	0	0	0	0	0	0	0	0	0	0	0	0	0	0	0	0	0
chr17	66053736	66070001	-	CEP112	1	13	0	0	0	0	0	0	0	0	0	0	0	0	0	0.0290444	0	0	0.0104998	0	0	0	0.0105441	0	0	0	0	0	0	0	0	0	0	0	0	0.0197506	0	0	0	0	0.0131307	0	0	0	0
chr17	66053736	66096632	-	CEP112	1	27	0	0	0	0	0	0.017942	0.0104492	0	0	0	0.0225478	0.0274061	0	0.0290444	0.0143092	0	0	0	0	0	0.0210882	0	0	0	0	0	0.0254342	0	0	0	0	0	0	0	0	0.0174408	0	0	0	0.005728	0	0.0160121	0
chr17	66062963	66096632	-	CEP112	1	2	0	0	0	0	0	0	0	0	0	0	0	0	0	0	0	0	0	0	0	0	0	0	0.0103481	0	0	0.0128174	0	0	0	0	0	0	0	0	0	0	0	0	0	0	0	0	0
chr17	66096251	66183307	-	CEP112	1	5	0	0	0	0	0	0.00897101	0	0	0	0	0	0	0	0	0	0	0	0	0	0	0	0	0	0	0	0	0	0	0	0	0	0	0	0	0	0	0	0	0	0	0	0	0
chr17	66129746	66183307	-	CEP112	1	2	0	0	0	0	0	0	0	0	0	0	0	0	0	0.0145222	0	0	0	0	0	0	0	0	0	0	0	0	0	0	0	0	0	0	0	0	0	0	0	0	0	0	0	0	0
chr17	66175044	66183307	-	CEP112	1	8	0	0	0	0	0	0	0	0	0	0	0	0	0	0.0145222	0	0	0	0	0	0	0	0	0	0	0	0.0128174	0	0	0	0	0	0	0	0	0	0	0	0	0	0.005728	0	0	0
chr17	661809	699380	-	VPS53	1	2	0	0	0	0	0	0	0	0	0	0	0	0	0	0	0	0	0.0104998	0	0	0	0	0	0	0	0	0	0	0	0	0	0	0	0	0	0	0	0	0	0	0	0	0	0
chr10	74843478	74838683	+	KAT6B	1	66	0	0.0734921	0.171295	0.0489018	0.0754415	0.026913	0	0.0113022	0	0.0324146	0.0450957	0.0411091	0	0.174267	0.0143092	0	0	0	0.0207708	0	0	0	0.0413924	0	0.0287802	0.0640871	0	0	0	0	0.0512386	0	0	0	0	0.0872042	0.0787584	0.0154646	0	0	0.0575406	0	0.030478
chr17	6620788	6628741	-	KIAA0753	1	1	0	0	0	0	0	0	0	0	0	0	0	0	0	0	0	0	0	0	0	0	0	0	0	0	0	0	0	0	0	0	0	0	0	0	0	0	0	0	0	0	0	0	0
chr17	66689047	66687111	+	PRKCA	1	85	0	0	0.0311446	0	0.0251472	0.017942	0	0	0	0.0324146	0	0.0274061	0.0195497	0.072611	0.0286185	0	0.0629991	0.0468941	0.0415416	0.0354709	0.0421765	0	0.0310443	0.0590101	0	0.0128174	0.0254342	0.0148968	0.0152018	0.0104822	0.0102477	0.0255745	0	0	0	0.0697634	0	0.0154646	0.0919149	0.022912	0	0.0480362	0.015239
chr17	66742760	66732688	+	PRKCA	1	9	0	0	0	0	0	0	0	0	0.0215419	0	0	0	0	0	0	0	0	0	0	0	0	0	0	0	0	0.0128174	0.0169561	0	0	0	0	0	0	0	0	0	0	0	0	0	0	0	0
chr17	66742760	66735489	+	PRKCA	1	2	0	0	0	0	0	0	0	0	0	0	0	0	0	0	0	0	0	0	0	0	0	0	0	0	0	0.0128174	0	0	0	0	0	0	0	0	0	0	0	0	0	0	0	0	0
chr17	66774067	66732688	+	PRKCA	1	3	0	0	0	0	0	0	0	0	0	0	0	0	0	0	0	0	0	0	0	0	0	0	0	0	0	0	0	0	0	0	0	0	0	0	0	0	0	0	0	0	0	0	0
chr17	66788979	66732688	+	PRKCA	1	1	0	0	0	0	0	0	0	0	0	0	0	0	0	0	0	0	0	0	0	0	0	0	0	0	0	0	0	0	0	0	0	0	0	0	0	0	0	0	0	0	0	0	0
chr17	67114324	67124014	-	HELZ	1	14	0	0	0	0	0	0	0	0	0	0	0	0	0	0	0.0143092	0.026796	0	0	0	0	0.0105441	0	0	0	0	0	0.0169561	0	0	0	0	0	0	0.0197506	0	0.0174408	0	0	0	0.011456	0	0	0.030478
chr17	67122970	67149985	-	HELZ	1	1	0	0	0	0	0	0	0	0	0	0	0	0	0	0	0	0	0	0	0	0	0	0	0	0	0	0.0128174	0	0	0	0	0	0	0	0	0	0	0	0	0	0	0	0	0
chr17	67128651	67138114	-	HELZ	1	2	0	0	0	0	0	0	0	0	0	0	0	0	0	0.0145222	0	0	0	0	0	0	0	0	0	0	0	0	0	0	0	0	0	0	0	0	0	0	0	0	0	0	0	0	0
chr17	67128651	67151224	-	HELZ	1	3	0	0	0	0	0	0	0	0	0	0	0	0	0	0	0	0	0	0	0	0	0	0	0	0	0	0	0	0	0	0	0	0	0	0	0	0	0	0	0	0	0	0	0
chr10	74843478	74842600	+	KAT6B	1	104	0.0664927	0	0.327018	0	0	0	0.0626953	0	0.280045	0	0	0	0.0195497	0.159744	0.128783	0.107184	0.0419994	0.0937882	0.0415416	0.0532064	0.0105441	0.0177926	0.0310443	0.0983502	0.0287802	0	0.00847806	0.178762	0.0152018	0.115304	0.0204954	0.0639363	0.0902266	0.0197506	0.0282301	0.0348817	0.0590688	0	0.0787842	0.022912	0	0.0320241	0
chr17	67145743	67151224	-	HELZ	1	1	0	0	0	0	0	0	0	0	0	0	0	0	0	0	0	0	0	0	0	0	0	0	0	0	0	0	0	0	0	0	0	0	0	0	0	0	0	0	0	0.005728	0	0	0
chr17	67151046	67178926	-	HELZ	1	10	0	0	0	0	0	0	0	0	0.0430839	0	0	0	0	0	0	0	0	0	0	0	0	0	0	0	0	0	0	0.0297937	0	0	0	0.0255745	0	0	0	0	0	0	0	0	0	0	0
chr17	67166478	67167796	-	HELZ	1	3	0	0	0	0	0	0	0	0	0	0	0	0	0	0.0145222	0	0	0	0	0	0	0.0210882	0	0	0	0	0	0	0	0	0	0	0	0	0	0	0	0	0	0	0	0	0	0
chr17	67166478	67190355	-	HELZ	1	2	0	0	0	0	0	0	0	0	0	0	0	0	0	0	0	0	0	0	0.0207708	0	0	0	0	0	0	0	0	0	0	0	0	0	0	0	0	0	0.0196896	0	0	0	0	0	0
chr17	67166478	67195470	-	HELZ	1	4	0	0	0	0	0	0	0	0	0	0	0	0	0	0	0	0	0	0	0	0	0	0	0	0	0	0	0	0	0	0	0	0	0	0	0	0	0	0	0	0.005728	0	0	0
chr17	67553617	67532802	+	PITPNC1	1	74	0	0	0	0	0	0.017942	0	0.0113022	0.0646258	0.0162073	0.0225478	0	0	0.072611	0.0286185	0.053592	0	0.00937882	0	0	0.084353	0.0177926	0.0517405	0.01967	0	0.0384523	0.0593464	0.0446905	0.0152018	0.0209643	0.0307431	0.0255745	0	0	0	0.0348817	0.0393792	0.0309292	0	0.022912	0	0.0240181	0
chr17	67578257	67532802	+	PITPNC1	1	38	0	0.018373	0.0155723	0	0	0	0	0	0	0	0	0.0548122	0	0	0	0.013398	0	0.00937882	0	0.106413	0	0	0	0	0	0.0256349	0	0	0	0	0	0	0	0	0	0	0.0196896	0	0.0393921	0	0.0191802	0	0
chr17	67632238	67532802	+	PITPNC1	1	6	0	0	0	0	0	0	0	0	0	0	0	0	0	0	0	0	0	0	0	0	0	0	0	0	0	0	0	0	0	0	0	0	0	0	0	0	0	0	0	0	0	0	0
chr17	67875744	67866464	+	BPTF	1	7	0	0	0	0	0	0	0	0	0	0.0162073	0	0	0	0	0	0	0	0	0	0	0	0	0.0206962	0	0	0	0	0.0148968	0	0	0	0	0	0	0	0	0	0	0	0.005728	0	0	0
chr17	67875744	67874817	+	BPTF	1	2	0	0	0	0	0	0	0	0	0	0	0	0	0	0.0145222	0	0	0	0	0	0	0	0	0	0	0	0	0	0	0	0	0	0	0	0	0	0	0	0	0	0	0	0	0
chr10	74960078	74838683	+	KAT6B	1	1	0	0	0	0	0	0	0	0	0	0	0	0	0	0	0	0	0	0	0	0	0	0	0	0	0	0.0128174	0	0	0	0	0	0	0	0	0	0	0	0	0	0	0	0	0
chr17	67894165	67891844	+	BPTF	1	14	0	0	0.0467169	0	0	0	0.0313477	0	0	0	0	0	0	0.0435666	0	0	0.0209997	0	0	0	0.0316324	0	0	0	0	0	0	0	0	0	0	0	0	0	0	0	0	0	0	0	0	0	0
chr17	67903918	67891844	+	BPTF	1	4	0	0	0	0	0	0	0	0	0	0	0	0	0	0	0	0	0	0	0	0	0	0	0	0	0	0	0	0.0148968	0	0	0	0	0	0	0	0	0	0	0	0	0	0	0
chr17	67913187	67910877	+	BPTF	1	2	0	0	0	0	0	0	0	0	0	0	0	0	0	0	0	0	0	0	0	0	0	0	0	0	0	0	0	0	0	0	0	0	0	0	0	0	0	0	0	0	0	0	0
chr17	67918838	67909582	+	BPTF	1	5	0	0	0	0	0	0	0	0	0.0215419	0	0	0	0	0	0	0	0	0	0	0	0	0	0	0	0	0	0.0169561	0	0	0	0	0	0	0	0	0	0	0	0	0.005728	0	0	0
chr17	67920143	67903789	+	BPTF	1	1	0	0	0	0	0	0	0	0	0	0	0	0	0	0.0145222	0	0	0	0	0	0	0	0	0	0	0	0	0	0	0	0	0	0	0	0	0	0	0	0	0	0	0	0	0
chr17	67922990	67910877	+	BPTF	1	49	0	0	0	0.0489018	0	0.026913	0.0208984	0.0113022	0	0	0	0.0274061	0.0195497	0	0	0.013398	0	0	0	0.0354709	0	0	0	0	0	0.0128174	0	0	0	0	0	0	0.0300755	0	0.0564602	0	0.0196896	0	0	0	0	0.00800603	0
chr17	67922990	67920015	+	BPTF	1	2	0	0	0	0	0	0	0	0	0	0	0	0	0	0	0	0	0	0	0	0	0	0	0	0	0	0	0	0	0	0	0	0	0	0	0	0	0	0	0	0.005728	0	0	0
chr17	67924589	67909582	+	BPTF	1	1	0	0	0	0	0	0	0	0	0	0	0	0	0	0	0	0	0	0	0	0	0	0	0	0	0	0	0	0	0	0	0	0	0	0	0	0	0	0	0	0	0	0	0
chr17	67924589	67910877	+	BPTF	1	17	0	0	0	0	0	0	0	0	0	0	0	0	0	0	0	0	0	0	0	0	0	0	0	0	0.0143901	0	0	0	0	0	0.0102477	0	0	0.0197506	0	0	0	0	0	0	0	0	0
chr17	67924589	67922840	+	BPTF	1	1	0	0	0	0	0	0	0	0	0	0	0	0	0	0	0	0	0.0104998	0	0	0	0	0	0	0	0	0	0	0	0	0	0	0	0	0	0	0	0	0	0	0	0	0	0
chr10	74979339	74959970	+	KAT6B	1	1	0	0	0	0	0	0	0	0	0	0	0	0	0	0	0	0	0	0	0	0	0	0	0	0	0	0	0	0	0	0	0	0	0	0	0	0	0	0	0	0	0	0	0
chr17	67929487	67928355	+	BPTF	1	17	0	0	0	0	0	0	0	0	0.0430839	0	0	0	0	0.0145222	0.0143092	0	0.0419994	0	0	0.0177355	0.0421765	0	0	0	0	0	0	0	0	0	0	0	0	0	0	0	0	0	0	0	0	0	0
chr17	67932019	67924547	+	BPTF	1	2	0	0	0	0	0	0	0	0	0	0	0	0	0	0	0	0	0.0104998	0	0	0	0	0	0	0	0	0	0	0	0	0	0	0	0	0	0	0	0	0	0	0	0	0	0
chr17	67932019	67928355	+	BPTF	1	49	0	0	0.0311446	0	0.0251472	0	0	0.0113022	0	0	0.0225478	0	0	0	0	0.013398	0	0.00937882	0	0	0.0210882	0	0.0103481	0	0	0	0.0339122	0.0297937	0	0.0104822	0.0102477	0	0	0.0197506	0	0.0697634	0.0196896	0.0154646	0	0.005728	0	0.0240181	0
chr17	67940656	67909582	+	BPTF	1	1	0	0	0	0	0	0	0	0	0	0	0	0	0	0	0	0	0	0	0	0	0	0	0	0	0	0	0	0	0	0	0	0	0	0	0	0	0	0	0	0	0	0	0
chr17	67940656	67910877	+	BPTF	1	3	0	0.018373	0	0	0	0	0	0	0	0	0	0	0	0	0	0	0	0	0	0	0	0	0	0	0	0	0	0	0	0	0	0	0	0	0	0	0	0	0	0	0	0	0
chr17	67944372	67910877	+	BPTF	1	17	0	0	0	0	0	0	0	0	0	0	0	0.013703	0	0.0145222	0.0143092	0	0	0	0	0	0	0	0	0	0.0143901	0	0	0	0	0	0	0	0	0	0	0	0	0.00773231	0	0	0	0	0
chr17	67948306	67928355	+	BPTF	1	1	0	0	0	0	0	0	0	0	0	0	0	0	0	0	0	0	0	0	0	0	0	0	0	0	0	0	0	0	0	0	0	0	0	0	0	0	0	0	0	0	0	0	0
chr17	67948306	67944150	+	BPTF	1	2	0	0	0	0	0	0	0.0104492	0	0	0	0	0	0	0	0	0	0	0	0	0	0	0	0	0	0	0	0	0	0	0	0	0	0	0	0	0	0	0	0	0	0	0	0
chr17	67948306	67945409	+	BPTF	1	59	0.0398956	0	0	0.0244509	0.0251472	0	0	0.0113022	0	0.0324146	0	0.0274061	0	0	0	0.053592	0.0209997	0.00937882	0.0207708	0	0	0.0177926	0	0	0.0287802	0	0.00847806	0.0297937	0	0	0.0102477	0	0	0	0	0	0	0.0154646	0	0.005728	0	0.00800603	0.015239
chr17	67948306	67947726	+	BPTF	1	2	0	0	0	0	0	0	0	0	0	0	0	0	0.0195497	0	0	0	0	0	0	0	0	0	0	0	0	0	0	0	0	0	0	0	0	0	0	0	0	0	0	0	0	0	0
chr10	74989112	74959970	+	KAT6B	1	5	0.0132985	0	0	0	0	0	0	0	0	0	0	0	0	0	0	0	0	0.00937882	0	0	0	0	0	0	0	0	0	0	0	0.0104822	0	0	0	0	0	0	0	0.00773231	0.0131307	0	0	0	0
chr17	67964404	67945409	+	BPTF	1	10	0	0	0	0	0	0	0	0	0	0	0	0	0	0	0	0	0	0	0	0	0	0	0	0	0	0	0	0	0	0	0.0204954	0	0	0	0	0	0	0	0	0.005728	0	0	0
chr17	67975958	67886128	+	BPTF	1	1	0	0	0	0	0	0	0	0	0	0	0	0	0	0	0	0	0	0	0	0	0	0	0	0	0	0	0	0	0	0	0	0	0	0	0	0	0	0	0	0	0	0	0
chr17	67975958	67945409	+	BPTF	1	111	0.0398956	0.110238	0.0311446	0	0.0251472	0.0448551	0.0313477	0.0678132	0	0.0648291	0	0.0411091	0.0390993	0.0145222	0.0286185	0.026796	0.0419994	0.0468941	0	0.0532064	0.0210882	0	0.0310443	0.01967	0.100731	0.0128174	0.00847806	0.0446905	0.0304037	0.0104822	0.0204954	0.0383618	0.0300755	0	0	0.0174408	0	0.0541262	0.0262614	0.034368	0	0.0240181	0.0457169
chr17	68307711	68306943	+	ARSG	1	4	0	0	0	0	0	0	0	0	0	0	0	0	0	0	0	0	0	0.0187576	0	0	0	0	0	0	0	0	0	0	0	0	0	0	0	0	0	0	0	0	0	0	0	0	0
chr17	68444493	68452992	-	WIPI1	1	1	0	0	0	0	0	0	0	0	0	0	0	0	0	0	0	0	0	0	0	0	0	0	0	0	0	0	0	0	0	0	0	0	0	0	0	0	0	0	0	0	0	0	0
chr17	68450728	68452992	-	WIPI1	1	1	0	0	0	0	0	0	0	0	0	0	0	0	0	0	0	0	0	0	0	0	0	0	0	0	0	0	0	0	0	0	0.0102477	0	0	0	0	0	0	0	0	0	0	0	0
chr17	68524958	68522756	+	PRKAR1A	1	5	0	0	0	0	0	0	0	0	0	0	0	0	0	0	0	0	0.0104998	0	0	0	0	0	0	0	0	0	0	0	0	0	0	0	0	0	0	0	0	0	0	0	0	0	0.015239
chr17	68530001	68525754	+	PRKAR1A	1	2	0	0	0	0	0	0	0	0	0	0	0	0	0	0	0	0	0	0	0	0	0	0	0	0	0	0	0	0	0	0	0	0	0	0	0	0	0	0	0.0131307	0.005728	0	0	0
chr17	69112183	69133867	-	ABCA6	1	1	0	0	0	0	0	0	0	0	0	0	0	0	0	0	0	0	0	0	0	0	0	0	0	0	0	0.0128174	0	0	0	0	0	0	0	0	0	0	0	0	0	0	0	0	0
chr17	69112183	69140748	-	ABCA6	1	2	0	0	0	0	0	0	0	0	0	0	0	0	0	0.0145222	0	0	0	0	0	0	0	0	0	0	0	0	0	0	0	0	0	0	0	0	0	0	0	0	0	0	0	0	0
chr10	74989112	74969660	+	KAT6B	1	49	0	0	0.0155723	0	0	0	0	0.0113022	0	0	0	0	0	0	0	0.013398	0	0	0.0207708	0.0354709	0	0	0.0103481	0.01967	0.0287802	0	0.0169561	0	0	0	0	0.0383618	0	0	0	0	0.0196896	0	0	0.005728	0	0.00800603	0
chr17	69117898	69125035	-	ABCA6	1	1	0	0	0.0155723	0	0	0	0	0	0	0	0	0	0	0	0	0	0	0	0	0	0	0	0	0	0	0	0	0	0	0	0	0	0	0	0	0	0	0	0	0	0	0	0
chr17	69155019	69155925	-	ABCA10	1	29	0	0	0.0155723	0	0	0.026913	0	0	0	0	0	0	0	0	0	0	0	0	0	0	0	0	0	0	0	0	0	0	0.0152018	0.0104822	0	0.0127873	0	0	0	0.0348817	0.0590688	0.00773231	0	0	0	0.0240181	0.015239
chr17	69155019	69179008	-	ABCA10	1	22	0	0	0	0	0	0	0	0	0	0.0162073	0	0	0	0.0435666	0	0	0	0	0	0	0.0210882	0	0	0.0393401	0	0	0.0169561	0	0	0	0	0	0	0	0	0	0	0.0154646	0.0131307	0.005728	0	0.0240181	0
chr17	69214704	69227285	-	ABCA10	1	4	0.0132985	0	0	0	0	0	0	0	0	0	0	0	0	0	0	0	0	0	0	0	0	0	0	0	0	0	0	0	0	0	0.0102477	0	0	0	0	0	0	0	0	0	0	0	0
chr17	69214704	69228860	-	ABCA10	1	3	0	0	0	0	0	0	0	0	0	0	0	0	0	0	0	0	0	0	0	0	0	0	0	0	0	0.0128174	0	0	0	0	0	0	0	0	0	0	0	0	0	0	0	0	0
chr17	69273943	69284072	-	ABCA5	1	14	0	0	0	0	0.0251472	0	0	0.0113022	0	0	0.0225478	0	0	0	0	0	0	0	0	0	0	0	0	0	0	0	0	0	0	0	0	0	0	0	0	0	0.0393792	0	0	0	0	0	0
chr17	69273943	69287751	-	ABCA5	1	2	0	0	0	0	0	0	0.0104492	0	0	0	0	0	0	0	0	0	0	0	0	0	0	0	0	0	0	0	0	0	0	0	0	0	0	0	0	0	0	0	0	0	0	0	0
chr17	69273959	69284072	-	ABCA5	1	34	0	0	0	0	0	0.00897101	0.0208984	0	0.0215419	0	0	0	0	0	0	0	0	0	0	0	0	0	0	0	0	0	0.00847806	0	0.0304037	0	0.0102477	0.0255745	0.0300755	0	0.0282301	0	0	0.00773231	0	0.005728	0	0.00800603	0
chr17	69273959	69287751	-	ABCA5	1	1	0	0	0	0	0	0	0	0	0	0	0	0	0	0	0	0	0	0	0	0	0	0	0.0103481	0	0	0	0	0	0	0	0	0	0	0	0	0	0	0	0	0	0	0	0
chr17	69289177	69302906	-	ABCA5	1	12	0	0	0	0	0	0	0	0	0	0	0	0	0	0	0	0	0	0	0	0	0.0105441	0	0	0	0	0	0.0169561	0	0	0	0	0	0	0	0	0.0174408	0.0393792	0	0	0	0	0.00800603	0
chr10	74989112	74970020	+	KAT6B	1	1	0	0	0	0	0	0	0	0	0	0	0	0	0	0	0	0	0	0	0	0	0	0	0	0	0	0	0	0	0	0	0	0	0	0	0	0	0	0	0	0	0	0	0
chr17	69294655	69302906	-	ABCA5	1	3	0	0	0	0	0	0	0	0	0	0	0	0	0	0	0	0	0	0	0	0	0	0	0	0	0	0	0	0	0	0	0	0	0	0	0	0	0	0	0	0	0	0.00800603	0
chr1	77068843	77068084	+	AL035409.1	1	6	0	0	0	0	0	0	0	0	0	0	0	0	0	0	0	0	0	0	0	0	0	0	0	0	0	0	0	0	0	0	0	0	0	0	0	0	0	0	0	0	0	0	0
chr1	77122275	77210489	-	PIGK	1	2	0	0	0	0	0	0	0	0	0	0	0	0	0	0	0	0	0	0	0	0	0	0	0	0	0	0	0	0	0	0	0	0	0	0	0	0	0	0	0	0	0	0	0
chr1	77154449	77169395	-	PIGK	1	15	0	0	0	0	0	0	0	0	0	0	0	0	0	0	0	0	0	0	0.0207708	0	0.0105441	0	0	0	0	0	0	0	0	0	0	0	0	0	0	0	0	0	0	0	0	0	0
chr1	77154449	77210489	-	PIGK	1	6	0	0	0	0	0	0	0	0	0	0	0	0	0	0	0	0	0	0	0	0	0	0	0	0	0	0	0	0	0	0	0	0	0	0	0	0	0	0	0	0	0	0	0
chr17	72220646	72221873	-	SOX9-AS1	1	2	0	0	0	0	0	0	0	0	0	0	0	0	0	0	0	0	0	0	0	0	0	0	0	0	0	0	0	0	0	0	0.0102477	0	0	0	0	0	0	0	0	0	0	0	0
chr17	7228969	7229274	-	DVL2	1	2	0	0.220476	0	0	0	0	0	0	0	0	0	0	0	0	0	0	0	0	0	0	0	0	0	0	0	0	0	0	0	0	0	0	0	0	0	0	0	0	0	0	0	0	0
chr17	72947731	73031714	-	SLC39A11	1	1	0	0	0	0	0	0	0	0	0	0	0	0	0	0	0	0	0	0.00937882	0	0	0	0	0	0	0	0	0	0	0	0	0	0	0	0	0	0	0	0	0	0	0	0	0
chr1	77297947	77286941	+	AK5	1	87	0.0265971	0	0.0311446	0	0.0502943	0.017942	0.0208984	0.0226044	0	0	0.0450957	0	0	0.116178	0.0286185	0.053592	0.0314995	0	0	0.0709419	0.0316324	0	0.0517405	0	0	0.0384523	0.0169561	0.0446905	0.0608073	0.0419287	0.0512386	0.0127873	0.0300755	0.0197506	0	0.0697634	0	0.0309292	0.0262614	0.02864	0.0191802	0.0160121	0
chr17	73203793	73203000	+	COG1	1	4	0	0	0	0.0244509	0	0	0	0	0	0	0	0	0	0	0	0	0	0	0	0	0	0	0	0	0	0	0	0	0	0	0	0	0	0	0	0	0	0	0	0	0	0.00800603	0
chr10	74989112	74972507	+	KAT6B	1	13	0	0	0	0	0	0	0	0	0	0	0.0225478	0	0	0.0145222	0	0	0	0	0	0	0.0105441	0	0	0	0	0	0	0	0	0	0	0	0	0	0	0	0	0	0	0	0	0	0
chr17	7321865	7322866	-	NEURL4	1	1	0	0	0	0	0	0	0	0	0	0	0	0	0	0	0.0143092	0	0	0	0	0	0	0	0	0	0	0	0	0	0	0	0	0	0	0	0	0	0	0	0	0	0	0	0
chr17	73236995	73235476	+	C17orf80	1	36	0	0	0	0	0	0	0	0.0226044	0	0	0	0.013703	0	0.0145222	0.0143092	0.026796	0	0.00937882	0.0207708	0	0.0421765	0	0.0206962	0	0	0.0256349	0.0423903	0	0	0.0104822	0	0.0127873	0	0	0	0.0174408	0.0590688	0	0	0	0	0.0160121	0
chr17	73243003	73235476	+	C17orf80	1	6	0	0	0	0	0	0	0	0	0	0	0	0	0	0	0	0	0	0	0	0	0	0	0	0	0	0	0	0	0	0	0	0	0	0	0	0	0	0	0	0.005728	0	0	0
chr1	77340568	77286941	+	AK5	1	51	0	0	0	0	0	0	0	0.0226044	0	0	0	0.0274061	0	0.145222	0	0	0	0	0	0	0	0.0177926	0.0103481	0	0	0.0256349	0	0.0446905	0	0	0	0.0127873	0.0300755	0	0	0	0	0.0154646	0	0	0.0191802	0.00800603	0
chr1	77340568	77293793	+	AK5	1	4	0	0	0	0	0	0	0	0	0	0	0	0	0	0	0	0	0	0	0	0	0	0	0	0	0	0	0	0	0	0	0	0	0	0	0	0	0	0	0	0	0	0	0
chr1	77417715	77286941	+	AK5	1	30	0	0	0	0	0	0	0	0	0	0	0	0.013703	0	0	0	0	0.0104998	0.00937882	0	0	0	0	0	0	0	0	0.00847806	0	0	0	0	0	0	0	0	0.0348817	0	0	0	0	0	0	0
chr1	77417715	77293793	+	AK5	1	3	0	0	0	0	0	0	0	0	0	0	0	0	0	0	0	0	0	0	0	0	0	0	0	0	0	0	0	0	0	0	0	0	0	0	0	0	0	0	0	0	0	0.00800603	0
chr1	77486352	77286941	+	AK5	1	10	0	0	0	0	0	0	0	0	0	0	0	0	0	0.0145222	0	0	0.0104998	0	0.0207708	0	0.0105441	0	0	0	0	0	0	0	0	0	0	0	0	0	0	0	0	0	0	0	0	0	0
chr17	7499491	7499039	+	POLR2A	1	19	0	0	0	0	0	0	0	0.0339066	0	0	0	0.013703	0	0.0435666	0	0	0	0	0	0	0.0210882	0	0.0103481	0	0	0	0.0169561	0	0	0	0	0	0	0	0	0	0	0	0	0.005728	0.0191802	0	0.030478
chr17	75146666	75148671	-	JPT1	1	1	0	0	0	0	0	0	0	0	0	0	0	0	0	0	0	0	0	0	0	0	0	0	0	0	0	0	0	0	0	0	0	0	0	0	0	0	0	0	0	0	0	0	0.015239
chr10	74989112	74975399	+	KAT6B	1	1	0	0	0	0	0	0	0	0	0	0	0	0	0	0	0	0	0	0.00937882	0	0	0	0	0	0	0	0	0	0	0	0	0	0	0	0	0	0	0	0	0	0	0	0	0
chr17	75242336	75243570	-	GGA3	1	14	0.0132985	0	0	0	0	0	0	0	0	0	0	0	0.0195497	0	0	0	0	0	0	0.0177355	0	0	0	0	0	0	0.00847806	0.0148968	0	0	0	0	0	0	0	0	0	0	0	0	0	0.00800603	0
chr17	75321659	75326020	-	GRB2	1	3	0	0	0	0	0	0	0	0	0	0	0	0	0	0	0	0	0	0	0	0	0	0	0	0	0	0	0	0	0	0	0	0	0	0	0	0	0	0	0	0	0	0	0
chr1	77536038	77286941	+	AK5	1	3	0	0	0	0	0	0	0	0	0	0	0	0	0	0.0290444	0	0	0	0	0	0	0	0	0	0	0	0	0	0	0	0	0	0	0	0	0	0	0	0	0	0.005728	0	0	0
chr1	77536038	77535847	+	AK5	1	1	0	0	0	0	0	0	0	0	0	0	0	0	0	0	0	0	0	0	0	0	0	0	0	0	0	0	0	0	0.0152018	0	0	0	0	0	0	0	0	0	0	0	0	0	0
chr1	77576068	77579628	-	ZZZ3	1	1	0	0	0	0	0	0	0	0	0	0	0	0	0	0	0	0	0	0	0	0	0	0	0	0	0	0	0	0	0	0	0	0	0	0	0	0	0	0	0	0	0	0	0
chr1	77580998	77633405	-	ZZZ3	1	1	0	0	0	0	0	0	0	0	0	0	0	0	0	0	0	0	0	0	0	0	0	0	0	0	0	0	0	0	0	0	0	0	0	0	0	0	0	0	0	0	0	0	0
chr17	75813878	75812112	+	UNK	1	2	0	0	0	0	0	0	0	0	0	0	0	0	0	0	0	0	0	0	0	0	0	0	0	0	0	0	0	0	0	0	0	0	0	0	0	0	0	0	0	0	0	0	0
chr17	75953451	75955947	-	ACOX1	1	1	0	0	0	0	0	0	0	0	0	0	0	0	0	0	0	0	0	0	0	0	0	0	0	0	0.0143901	0	0	0	0	0	0	0	0	0	0	0	0	0	0	0	0	0	0
chr17	75955566	75955947	-	ACOX1	1	5	0	0	0	0	0	0	0	0	0	0	0	0	0	0	0	0	0	0	0	0	0	0	0	0	0	0	0	0	0	0	0	0	0	0	0	0	0	0	0	0	0	0	0
chr17	76047906	76057543	-	SRP68	1	1	0	0	0	0	0	0	0	0	0	0	0	0	0	0	0	0	0	0	0	0	0	0	0	0	0	0	0	0	0	0	0	0	0	0	0	0	0	0	0	0	0	0	0
chr10	106652382	106679734	-	SORCS1	1	1	0	0	0	0	0	0	0	0	0	0	0	0	0	0	0	0	0	0	0	0	0	0	0	0.01967	0	0	0	0	0	0	0	0	0	0	0	0	0	0	0	0	0	0	0
chr10	74989112	74977316	+	KAT6B	1	2	0	0	0	0	0	0	0	0	0	0	0	0	0	0	0	0	0	0	0	0	0	0	0	0	0	0	0	0.0148968	0	0	0	0	0	0	0	0	0	0	0	0	0	0	0
chr17	76094414	76101863	-	EXOC7	1	1	0	0	0	0	0	0	0	0	0	0	0	0	0	0	0	0	0	0	0	0	0	0	0	0	0	0	0	0	0	0	0	0	0	0	0	0	0	0	0	0	0	0	0
chr17	76097796	76098018	-	EXOC7	1	2	0	0	0	0	0	0	0	0	0	0	0	0	0	0	0	0	0	0	0	0	0	0	0	0	0	0	0	0	0	0	0	0	0	0	0	0	0	0	0	0	0	0	0
chr17	76287192	76287897	-	QRICH2	1	2	0	0	0	0	0	0	0	0	0	0	0	0	0	0	0	0	0	0	0	0	0	0	0	0	0	0	0	0	0	0	0	0	0	0	0	0	0	0	0	0	0	0	0
chr17	76287192	76290077	-	QRICH2	1	22	0	0.0367461	0	0	0	0	0	0	0	0.0162073	0	0	0	0	0	0	0	0	0	0.0177355	0.0105441	0	0	0	0.0143901	0	0	0	0	0	0	0	0	0	0	0	0	0	0	0.005728	0	0	0
chr17	76287192	76304941	-	QRICH2	1	24	0	0	0	0	0	0	0.0104492	0	0	0	0	0	0	0	0	0	0	0.00937882	0	0	0.0210882	0.0177926	0	0	0	0	0	0	0	0	0	0	0	0.0395013	0	0	0	0.00773231	0	0.02864	0	0.0160121	0
chr17	76291015	76294021	-	QRICH2	1	8	0	0	0	0	0	0	0.0104492	0	0	0	0	0	0	0	0	0	0	0.00937882	0	0	0.0105441	0	0	0	0	0	0	0	0	0	0	0	0	0	0	0	0	0.00773231	0	0	0	0	0
chr1	77631850	77633405	-	ZZZ3	1	18	0	0	0	0	0	0	0	0	0	0	0	0	0	0	0	0	0	0	0	0	0	0	0	0	0	0.0128174	0	0	0	0	0	0	0	0	0	0	0.0196896	0	0.0262614	0	0	0.0160121	0
chr1	77631850	77641655	-	ZZZ3	1	81	0	0	0	0	0	0.00897101	0.0104492	0.0226044	0.0215419	0	0	0	0.0195497	0.0435666	0	0.040194	0	0.00937882	0	0	0.0210882	0	0.0103481	0.01967	0.0143901	0.0384523	0.00847806	0.0148968	0	0.0314465	0.0204954	0.0255745	0.0300755	0.0197506	0	0	0.0393792	0.0231969	0.0131307	0	0.0383604	0.0160121	0.015239
chr17	76742273	76740957	+	MFSD11	1	1	0	0	0	0	0	0	0	0	0	0	0	0	0	0.0145222	0	0	0	0	0	0	0	0	0	0	0	0	0	0	0	0	0	0	0	0	0	0	0	0	0	0	0	0	0
chr17	76744466	76740957	+	MFSD11	0		0	0	0	0	0	0	0	0	0	0	0	0	0	0	0	0	0	0	0	0	0	0	0	0	0	0	0	0	0	0	0	0	0	0	0	0	0	0	0	0	0	0	0
chr10	75151106	75150514	+	SAMD8	1	14	0	0	0	0	0.0251472	0	0	0	0	0	0	0	0	0	0	0	0	0	0	0	0	0	0.0103481	0	0	0	0.00847806	0	0	0	0	0	0	0.0197506	0	0	0	0	0	0	0	0	0
chr17	76769871	76738282	+	MFSD11	1	1	0	0	0	0	0	0	0	0	0	0	0	0	0	0	0	0	0	0	0	0	0	0	0	0	0	0	0	0	0	0	0	0	0	0	0	0	0	0	0	0.005728	0	0	0
chr17	76776541	76741969	+	MFSD11	1	2	0	0	0	0	0	0	0	0	0	0	0	0	0	0	0	0	0	0	0	0	0	0	0	0	0	0	0	0	0	0	0	0	0	0	0	0	0	0.00773231	0	0	0	0	0
chr17	76776541	76754047	+	MFSD11	1	1	0	0	0	0	0	0	0	0	0	0	0	0	0	0	0	0	0	0	0	0	0	0	0	0	0	0	0	0	0	0	0	0	0	0	0	0	0	0	0	0	0	0.00800603	0
chr17	76776541	76767386	+	MFSD11	1	12	0	0	0	0	0	0	0	0.0113022	0	0	0	0	0	0.0145222	0	0	0	0	0	0	0.0210882	0	0	0	0	0	0	0	0	0	0	0	0	0	0	0	0	0	0	0	0.0191802	0	0
chr17	76906187	76882151	+	MGAT5B	1	4	0	0	0	0	0	0	0	0	0	0	0	0	0	0	0	0	0	0	0	0	0	0	0	0	0	0	0	0	0	0	0	0	0	0	0	0	0	0	0	0	0	0	0
chr17	76940848	76940402	+	MGAT5B	1	1	0	0	0	0	0	0	0	0	0	0	0	0	0	0	0	0	0	0.00937882	0	0	0	0	0	0	0	0	0	0	0	0	0	0	0	0	0	0	0	0	0	0	0	0	0
chr17	769869	770157	-	GLOD4	1	1	0	0	0	0	0	0	0	0	0	0	0	0	0	0	0	0	0	0	0	0	0	0	0	0	0	0	0	0	0	0	0	0	0	0	0	0	0	0	0	0.005728	0	0	0
chr1	77701369	77725762	-	USP33	1	2	0	0	0	0	0	0	0	0	0	0	0	0	0	0	0	0	0	0	0	0	0	0	0	0	0.0143901	0	0	0	0	0	0	0	0	0	0	0	0	0	0	0	0	0	0
chr1	77711747	77714783	-	USP33	1	25	0	0	0	0	0	0	0	0.0113022	0	0.0324146	0	0	0.0195497	0	0	0.013398	0	0.00937882	0	0	0	0	0.0103481	0	0.0287802	0	0.00847806	0	0	0	0	0	0	0	0	0	0	0.0154646	0	0.005728	0	0	0
chr1	77711747	77715868	-	USP33	1	24	0	0	0	0	0	0	0	0	0	0	0	0	0	0	0	0	0.0209997	0	0	0	0	0.0177926	0	0.01967	0.0287802	0.0128174	0.00847806	0	0	0	0.0102477	0	0	0.0197506	0	0	0	0	0	0	0.0191802	0	0
chr10	75164740	75150514	+	SAMD8	1	5	0	0	0	0	0	0	0	0	0	0	0	0	0	0	0	0	0	0	0.0207708	0	0	0	0	0	0	0	0	0.0148968	0	0	0	0	0	0	0	0	0.0196896	0	0	0	0	0	0
chr1	77711747	77725762	-	USP33	1	3	0	0	0	0	0	0	0	0	0	0	0	0	0	0	0	0	0.0104998	0	0	0	0	0	0	0	0	0	0	0	0	0	0	0	0	0	0	0	0	0	0	0	0	0	0
chr1	77711747	77730731	-	USP33	1	2	0	0	0	0	0	0	0	0	0	0	0	0	0	0	0	0	0	0	0	0	0	0	0	0	0	0	0	0	0	0	0	0	0	0	0	0	0	0	0	0	0	0	0
chr1	77711747	77736158	-	USP33	1	6	0	0	0	0	0	0	0	0	0	0	0	0	0	0	0	0	0	0	0	0	0	0	0	0	0	0	0	0	0	0	0	0	0	0	0	0	0	0.0154646	0	0.011456	0	0	0
chr1	77713200	77714783	-	USP33	1	2	0	0	0	0	0	0	0	0	0	0	0	0	0	0	0	0	0	0	0	0	0	0	0	0	0.0143901	0	0	0	0	0	0	0	0	0	0	0	0	0	0	0	0	0	0
chr1	77717867	77718641	-	USP33	1	18	0	0	0.0155723	0.0244509	0	0	0	0.0113022	0	0	0	0	0.058649	0	0	0	0.0104998	0	0	0	0	0	0	0	0	0	0.00847806	0	0	0	0	0	0	0.0197506	0	0	0	0	0	0	0	0	0
chr1	77717867	77725762	-	USP33	1	95	0	0.0551191	0.0467169	0.0244509	0	0.017942	0.0835938	0.0113022	0.129252	0.0162073	0	0.0274061	0	0.159744	0.171711	0.0803879	0.0314995	0.0281364	0.0207708	0.0532064	0.0210882	0	0.0620886	0.0590101	0.0143901	0.0128174	0.00847806	0.089381	0.0152018	0.0419287	0.0102477	0.0639363	0.0902266	0	0	0	0	0.00773231	0.0525228	0.02864	0	0.0320241	0
chr1	77723331	77725762	-	USP33	1	1	0	0	0	0	0	0	0	0	0	0	0	0	0	0	0	0	0	0	0	0	0	0	0.0103481	0	0	0	0	0	0	0	0	0	0	0	0	0	0	0	0	0	0	0	0
chr1	77725622	77736158	-	USP33	1	2	0	0	0	0	0	0	0	0	0	0	0	0.013703	0	0	0	0	0	0	0	0	0	0	0	0	0	0	0	0	0	0	0	0	0	0	0	0	0	0	0	0	0	0.0160121	0
chr1	77725622	77739417	-	USP33	1	1	0	0	0	0	0	0	0	0	0	0	0	0	0	0	0	0	0	0	0	0	0	0	0	0	0	0	0.00847806	0	0	0	0	0	0	0	0	0	0	0	0	0	0	0	0
chr1	77728295	77739417	-	USP33	1	1	0	0	0	0	0	0	0	0	0	0	0	0	0	0	0	0	0	0	0	0	0	0	0	0	0	0	0	0	0	0	0	0	0	0	0	0	0	0	0	0	0	0	0
chr10	75168658	75150514	+	SAMD8	1	10	0	0	0	0	0	0.00897101	0	0	0	0	0	0	0	0	0.0143092	0	0	0.00937882	0	0	0	0	0	0	0	0	0.00847806	0	0	0	0	0	0	0	0	0	0	0.00773231	0	0.005728	0	0	0
chr1	77729860	77736158	-	USP33	1	5	0	0	0	0	0	0	0	0	0	0	0	0	0	0	0	0	0	0	0	0	0.0210882	0	0	0	0	0	0	0	0	0	0	0	0	0	0	0	0	0	0	0	0	0	0
chr1	77729860	77739417	-	USP33	1	2	0	0	0	0	0	0	0	0	0	0	0	0	0	0	0	0	0	0	0	0	0	0	0	0	0	0	0	0	0	0	0	0	0	0	0	0	0	0	0	0	0	0	0
chr17	77402703	77402059	+	SEPT9	1	35	0	0	0	0	0	0.00897101	0	0.0113022	0.0215419	0	0	0	0	0.0145222	0	0.013398	0	0	0	0	0	0	0	0	0	0.0128174	0.00847806	0	0	0	0.0204954	0	0	0	0	0.0174408	0.0196896	0.0231969	0	0	0	0	0
chr1	7778169	7777160	+	VAMP3	1	110	0.0132985	0	0.0155723	0	0.0251472	0.026913	0.0313477	0.056511	0.0430839	0.0162073	0	0.0274061	0.0195497	0.072611	0.0286185	0.053592	0.0209997	0.0281364	0.0415416	0	0.0421765	0.0177926	0.0310443	0	0.0431703	0.0769046	0.0169561	0.0595873	0.0304037	0.0104822	0.0307431	0.0127873	0.0300755	0.0395013	0.0282301	0.0523225	0.0393792	0.0309292	0.0262614	0.034368	0.0383604	0.0320241	0.030478
chr17	78031842	78004170	+	TNRC6C	1	64	0	0	0	0	0.0502943	0.017942	0	0	0.0215419	0.0162073	0	0.013703	0	0.0580888	0	0.040194	0.0104998	0.0468941	0.0623124	0.0177355	0.0105441	0	0.0103481	0	0.0143901	0.0128174	0	0	0.0152018	0	0.0102477	0.0255745	0	0.0395013	0.0282301	0.0174408	0	0.00773231	0	0	0	0.00800603	0
chr17	78051448	78031516	+	TNRC6C	1	3	0	0	0	0	0	0	0	0	0	0	0	0	0	0.0145222	0	0	0	0	0	0	0	0	0	0	0	0	0	0	0	0	0	0	0	0	0	0	0	0	0	0	0	0	0
chr17	78051448	78048845	+	TNRC6C	1	3	0	0	0.0155723	0	0	0	0	0	0	0	0	0	0	0	0	0	0	0	0.0207708	0	0	0	0	0	0	0	0	0	0	0	0	0	0	0	0	0	0	0	0	0	0	0	0
chr17	78067923	78064722	+	TNRC6C	1	1	0	0	0	0	0	0	0	0	0	0	0	0	0	0	0	0	0	0	0	0	0	0	0	0	0.0143901	0	0	0	0	0	0	0	0	0	0	0	0	0	0	0	0	0	0
chr1	77807101	77783238	+	MIGA1	1	1	0	0.018373	0	0	0	0	0	0	0	0	0	0	0	0	0	0	0	0	0	0	0	0	0	0	0	0	0	0	0	0	0	0	0	0	0	0	0	0	0	0	0	0	0
chr1	77807101	77801331	+	MIGA1	1	30	0	0	0.0155723	0	0	0.00897101	0.0104492	0	0	0	0	0	0	0	0	0	0	0	0	0	0.0210882	0	0.0103481	0	0	0.0128174	0.0169561	0	0	0.0104822	0	0.0127873	0	0	0	0.0174408	0	0.00773231	0	0	0	0.00800603	0
chr10	75176216	75150514	+	SAMD8	1	8	0	0	0	0	0	0	0	0.0113022	0	0	0	0	0	0	0	0	0	0	0	0	0	0	0.0103481	0	0	0	0	0	0	0	0	0	0	0	0	0	0	0	0	0.005728	0	0	0
chr1	77807101	77803270	+	MIGA1	1	3	0	0	0	0	0	0	0	0	0	0	0	0	0	0	0	0	0	0.0187576	0	0	0	0	0	0	0	0	0	0	0	0	0	0	0	0	0	0	0	0	0	0	0	0	0
chr17	78071165	78064722	+	TNRC6C	1	4	0	0	0	0	0	0	0	0	0.0215419	0	0	0	0	0	0	0	0.0104998	0	0	0	0	0	0	0	0	0	0	0	0	0	0	0	0	0	0	0	0	0	0	0	0	0	0
chr17	78071165	78067757	+	TNRC6C	1	3	0	0	0	0	0	0	0	0	0	0	0	0	0	0	0	0	0	0	0	0	0.0105441	0	0	0	0	0	0	0	0	0	0	0	0	0	0	0	0	0	0	0	0	0	0
chr17	78083166	78073037	+	TNRC6C	1	2	0	0	0	0	0	0	0	0	0	0	0	0	0	0	0	0	0	0	0	0	0	0	0	0	0	0	0	0	0	0	0	0	0	0	0	0	0	0	0	0	0	0	0
chr17	78083166	78079395	+	TNRC6C	1	9	0	0	0	0	0	0	0	0	0	0	0	0	0	0.0145222	0	0	0	0	0	0	0	0	0	0	0	0	0.00847806	0	0	0	0	0	0	0	0	0	0	0	0	0	0	0	0
chr17	78087093	78077185	+	TNRC6C	1	1	0	0	0	0	0	0	0	0	0	0	0	0	0	0	0	0	0	0	0	0	0	0	0	0	0	0.0128174	0	0	0	0	0	0	0	0	0	0	0	0	0	0	0	0	0
chr17	78087093	78079395	+	TNRC6C	1	11	0	0	0	0	0	0	0	0	0	0	0	0	0	0	0	0	0	0	0.0415416	0	0	0	0	0	0	0	0	0.0148968	0	0.0104822	0.0102477	0	0	0	0	0.0174408	0	0	0	0	0	0	0
chr17	78087093	78086503	+	TNRC6C	1	46	0	0	0.0155723	0	0	0	0.0104492	0	0	0.0162073	0.0225478	0.013703	0	0	0.0286185	0.013398	0.0104998	0.00937882	0	0.0177355	0.0210882	0	0.0206962	0.01967	0	0.0128174	0.0169561	0.0148968	0.0304037	0.0419287	0.0102477	0.0127873	0	0	0.0282301	0.0174408	0	0.00773231	0	0.005728	0	0	0
chr17	78093763	78079395	+	TNRC6C	1	7	0	0	0	0	0	0	0	0	0	0	0	0	0	0	0	0	0.0104998	0	0	0	0	0	0	0	0	0	0	0	0	0	0	0	0	0	0	0	0	0	0	0	0	0	0
chr17	78093763	78086503	+	TNRC6C	1	8	0	0	0	0	0	0	0	0	0	0	0	0	0	0	0	0	0.0104998	0	0	0	0	0	0	0	0	0	0	0	0.0152018	0	0	0	0	0	0	0	0	0	0	0.005728	0	0	0
chr10	76058783	76036008	+	LRMDA	1	5	0	0	0	0	0	0	0	0	0	0	0	0	0	0	0	0	0	0	0	0.0177355	0.0105441	0	0	0	0	0	0	0	0	0	0	0	0	0	0	0	0	0	0	0	0.0191802	0	0
chr17	78093763	78091440	+	TNRC6C	1	7	0	0	0	0	0	0	0	0	0	0	0	0	0	0.0145222	0	0	0	0	0	0	0	0	0	0	0	0	0.00847806	0	0	0	0	0.0127873	0	0	0	0	0	0	0	0	0	0.0160121	0
chr17	78093763	78092933	+	TNRC6C	1	7	0	0	0	0	0	0	0.0104492	0	0	0	0	0	0	0	0	0	0	0	0	0	0	0	0	0	0	0	0	0	0	0	0	0	0	0	0	0	0	0	0	0.005728	0	0	0
chr17	78097861	78083047	+	TNRC6C	1	1	0	0	0	0	0	0	0	0	0	0	0	0	0	0	0	0	0	0.00937882	0	0	0	0	0	0	0	0	0	0	0	0	0	0	0	0	0	0	0	0	0	0	0	0	0
chr1	77813867	77803270	+	MIGA1	1	3	0	0	0	0	0	0	0	0	0	0	0	0	0	0	0	0	0	0	0	0	0	0	0	0	0.0143901	0	0	0	0	0	0	0	0	0	0	0	0	0	0	0	0	0	0
chr1	77815231	77801331	+	MIGA1	1	89	0.0398956	0	0	0	0	0.026913	0.0104492	0.056511	0.0215419	0.0324146	0	0.013703	0.0390993	0.0290444	0.0286185	0.013398	0.0209997	0.0187576	0.0207708	0	0.0316324	0	0.0103481	0.0393401	0	0.0640871	0	0.0446905	0	0	0.0204954	0.0127873	0	0.0395013	0	0.0174408	0.0590688	0.0309292	0.0262614	0.022912	0	0.0160121	0.015239
chr1	77815231	77813734	+	MIGA1	1	3	0	0	0	0	0	0.00897101	0	0	0	0	0	0	0	0	0	0	0	0.00937882	0	0	0	0	0	0	0	0	0	0	0	0	0	0	0	0	0	0	0	0	0	0	0	0	0
chr17	78192785	78190970	+	AFMID	1	2	0	0	0	0	0	0	0	0	0	0	0	0	0	0	0.0143092	0	0	0	0	0	0	0	0	0	0	0	0	0	0	0	0	0	0	0	0	0	0	0	0	0	0	0	0
chr17	78398351	78392476	+	PGS1	1	3	0	0	0	0	0	0	0	0	0	0	0	0	0	0	0	0	0.0104998	0	0	0	0	0	0	0	0	0	0	0	0	0	0	0	0	0	0	0	0	0	0	0	0	0	0
chr17	78399537	78392476	+	PGS1	1	2	0	0	0	0	0	0	0	0	0	0	0	0	0	0	0	0	0	0	0	0	0	0	0	0	0	0	0	0	0	0	0	0	0	0	0	0	0	0	0	0	0	0	0
chr17	78400855	78400677	+	PGS1	1	8	0	0	0	0	0	0	0.0208984	0	0	0	0	0	0	0	0	0	0.0104998	0	0	0.0354709	0	0	0	0	0	0	0	0	0	0	0	0	0	0	0	0	0	0.0154646	0	0	0	0	0
chr10	76887291	77019099	-	KCNMA1	1	1	0	0	0	0	0	0	0	0	0	0	0	0	0	0	0	0	0	0	0	0	0	0	0	0	0	0	0	0	0	0	0	0	0	0	0	0	0	0.00773231	0	0	0	0	0
chr17	78404089	78392476	+	PGS1	1	1	0	0	0	0	0	0	0	0	0	0	0	0	0	0	0	0	0	0	0	0	0	0	0.0103481	0	0	0	0	0	0	0	0	0	0	0	0	0	0	0	0	0	0	0	0
chr1	77843407	77783238	+	MIGA1	1	7	0	0	0	0	0	0	0	0	0	0	0	0	0	0	0	0	0	0	0	0	0	0	0	0	0	0	0	0	0	0	0	0	0	0	0	0	0	0	0	0	0	0	0
chr1	77843407	77801331	+	MIGA1	1	20	0	0	0	0	0	0	0	0	0	0	0.0225478	0	0	0	0	0	0	0	0	0.0177355	0	0	0	0	0	0	0.0169561	0	0	0	0	0	0.0300755	0	0	0	0	0	0	0	0.0191802	0	0
chr1	77843407	77813734	+	MIGA1	1	8	0	0	0.0155723	0	0	0	0	0	0.0215419	0	0	0	0	0	0	0	0	0	0	0	0.0105441	0	0	0	0	0	0	0	0.0304037	0	0	0	0	0	0	0	0	0	0	0	0	0	0
chr1	77861322	77843307	+	MIGA1	1	2	0	0	0	0	0	0	0	0	0	0	0	0	0	0.0145222	0	0	0	0	0	0	0	0	0	0	0	0	0	0	0	0	0	0	0	0	0	0	0	0	0	0	0	0	0
chr1	77861322	77858938	+	MIGA1	1	25	0	0	0	0	0	0.00897101	0	0	0	0	0	0	0	0	0	0.013398	0	0.00937882	0	0.0177355	0.0105441	0	0.0103481	0	0	0.0128174	0	0.0148968	0	0	0	0	0	0.0197506	0	0	0	0	0	0	0	0.00800603	0
chr1	77864028	77858938	+	MIGA1	1	17	0	0	0	0	0.0251472	0	0.0104492	0	0	0	0.0225478	0	0	0	0	0	0	0	0	0	0	0	0	0	0	0	0.00847806	0	0	0	0	0	0	0.0197506	0	0	0	0.00773231	0	0	0	0	0
chr1	77866391	77801331	+	MIGA1	1	2	0	0	0	0	0	0	0	0	0	0	0	0	0	0	0	0	0	0	0	0	0	0	0	0	0	0	0	0	0	0	0	0	0	0	0	0	0	0	0	0	0	0	0
chr1	77866391	77858938	+	MIGA1	1	25	0	0	0.0155723	0	0	0	0	0.0113022	0	0	0	0	0	0	0.0143092	0	0	0	0	0	0.0421765	0	0	0	0	0.0128174	0	0	0	0.0209643	0	0	0	0	0	0	0	0	0	0.005728	0	0.00800603	0.015239
chr17	78692417	78698968	-	CYTH1	1	1	0	0	0	0	0	0	0	0	0	0	0	0	0	0	0	0	0	0	0	0	0	0	0	0	0	0	0.00847806	0	0	0	0	0	0	0	0	0	0	0	0	0	0	0	0
chr10	76909966	76970067	-	KCNMA1	1	26	0	0	0	0	0	0	0.0104492	0	0	0	0	0	0	0.0145222	0	0	0	0	0	0	0	0	0	0.01967	0	0.0128174	0.0169561	0	0	0.0209643	0	0.0127873	0	0	0	0.0174408	0	0	0	0.005728	0	0	0
chr17	78803385	78803978	-	USP36	1	1	0	0	0	0	0	0	0	0	0	0	0	0	0	0	0	0	0	0	0	0	0	0	0	0	0	0	0	0	0.0304037	0	0	0	0	0	0	0	0	0	0	0	0	0	0
chr17	788132	783083	+	MRM3	1	1	0	0	0	0	0	0	0	0	0	0	0	0	0	0	0	0	0	0	0	0	0	0	0	0	0	0	0	0	0	0	0	0	0	0	0	0	0	0	0	0	0	0	0
chr17	78818667	78821061	-	USP36	1	3	0	0	0	0	0	0	0	0	0	0	0	0	0	0	0	0.026796	0	0	0	0	0	0	0	0	0	0	0	0	0	0	0	0	0	0	0	0	0	0.0154646	0	0	0	0	0
chr17	78818667	78836372	-	USP36	1	3	0	0	0	0	0	0	0	0	0	0	0	0	0	0	0	0	0	0	0	0	0	0	0	0	0	0	0	0	0	0.0104822	0.0102477	0	0	0	0	0	0	0	0	0.011456	0	0	0
chr17	79077864	79077430	+	ENGASE	1	37	0	0	0	0	0	0	0.0104492	0.0113022	0.0430839	0	0	0	0	0.0290444	0.0429277	0.013398	0	0.00937882	0	0	0	0.0177926	0	0	0	0	0	0	0.0152018	0	0.0102477	0.0255745	0	0	0	0.0174408	0.0393792	0.0154646	0	0	0	0	0
chr17	7945986	7945728	+	CNTROB	1	1	0	0	0	0	0	0	0	0	0	0	0	0	0	0	0	0	0	0	0	0	0	0	0	0	0	0	0.00847806	0	0	0	0	0	0	0	0	0	0	0	0	0	0	0	0
chr1	77949155	77967666	-	FUBP1	1	1	0	0	0	0	0	0	0	0	0	0	0	0	0	0	0	0	0	0	0	0	0	0	0	0	0	0	0	0	0	0	0	0	0	0	0	0	0	0	0	0	0	0	0
chr17	80040270	80039812	+	CCDC40	1	1	0	0	0	0	0	0	0	0	0	0	0	0	0.0195497	0	0	0	0	0	0	0	0	0	0	0	0	0	0	0	0	0	0	0	0	0	0	0	0	0	0	0	0	0	0
chr17	80050283	80039812	+	CCDC40	1	4	0	0	0	0	0	0	0	0	0	0	0	0	0	0	0	0	0	0	0	0	0	0	0	0	0	0	0.00847806	0	0	0	0	0	0	0	0	0	0	0	0	0.005728	0	0	0
chr17	80050283	80048583	+	CCDC40	1	47	0	0	0	0	0.0502943	0.00897101	0.0104492	0	0.0215419	0.0162073	0	0.013703	0	0.0145222	0.0143092	0	0	0	0	0	0.0105441	0.0177926	0.0103481	0	0	0	0.0169561	0	0	0.0104822	0.0102477	0	0	0.0197506	0.0282301	0	0	0	0	0.005728	0	0.00800603	0
chr10	76909966	76974573	-	KCNMA1	1	1	0	0	0	0	0	0	0	0	0	0	0	0	0	0	0	0	0	0.00937882	0	0	0	0	0	0	0	0	0	0	0	0	0	0	0	0	0	0	0	0	0	0	0	0	0
chr17	80227960	80225837	+	SLC26A11	1	3	0	0	0	0	0	0	0.0104492	0	0	0	0	0	0	0	0	0	0	0	0	0	0	0	0	0	0	0	0	0	0	0	0	0	0	0	0	0	0	0	0	0	0	0	0
chr17	80298518	80291628	+	RNF213	1	1	0	0	0	0	0	0	0	0	0	0.0162073	0	0	0	0	0	0	0	0	0	0	0	0	0	0	0	0	0	0	0	0	0	0	0	0	0	0	0	0	0	0	0	0	0
chr1	7803848	7786721	+	PER3	1	1	0	0	0	0	0	0	0	0	0	0	0	0	0	0	0	0	0	0	0	0	0	0	0	0	0	0	0	0	0	0	0	0	0	0	0	0	0	0	0	0	0	0	0
chr1	7803848	7793957	+	PER3	1	4	0	0	0	0	0	0	0	0	0	0	0	0	0	0	0	0	0	0	0	0	0.0105441	0	0	0	0	0	0	0.0148968	0	0	0	0	0	0	0	0	0	0	0	0	0	0	0
chr1	7803848	7793960	+	PER3	1	3	0	0	0	0	0	0	0	0	0	0	0	0	0	0	0	0	0	0	0	0	0.0105441	0	0	0	0	0	0	0.0148968	0	0	0	0	0	0	0	0	0	0	0	0	0	0	0
chr17	80857900	80837922	+	RPTOR	1	1	0	0	0	0	0	0	0	0	0	0	0	0	0	0	0	0	0	0	0	0	0	0	0.0103481	0	0	0	0	0	0	0	0	0	0	0	0	0	0	0	0	0	0	0	0
chr17	80857900	80846473	+	RPTOR	1	1	0	0	0	0	0	0	0	0	0	0	0	0	0	0	0	0	0	0.00937882	0	0	0	0	0	0	0	0	0	0	0	0	0	0	0	0	0	0	0	0	0	0	0	0	0
chr17	80893865	80891720	+	RPTOR	1	10	0	0	0	0	0	0	0	0	0	0	0	0	0.0195497	0	0	0	0	0	0	0	0	0	0	0	0	0	0	0.0148968	0	0	0.0102477	0	0	0	0	0.0174408	0	0	0	0	0	0	0
chr17	81086580	81057881	+	BAIAP2	1	1	0	0	0	0	0	0	0	0	0	0	0	0	0	0	0	0	0	0	0	0	0	0	0	0	0	0	0	0	0.0152018	0	0	0	0	0	0	0	0	0	0	0	0	0	0
chr17	81086580	81084832	+	BAIAP2	1	1	0	0	0	0	0	0	0	0	0	0	0	0	0	0	0	0	0	0	0	0	0	0	0	0	0	0	0	0	0	0.0104822	0	0	0	0	0	0	0	0	0	0	0	0	0
chr10	76914936	76970067	-	KCNMA1	1	3	0	0	0	0	0	0	0	0	0	0	0	0	0	0	0	0	0	0	0	0	0	0	0	0	0	0	0	0	0	0	0	0	0	0	0	0	0	0	0	0	0	0	0
chr17	81565505	81572088	-	NPLOC4	1	2	0	0	0	0	0	0	0	0	0	0	0	0	0	0	0	0	0	0	0	0	0	0	0	0	0	0	0.0169561	0	0	0	0	0	0	0	0	0	0	0	0.0131307	0	0	0	0
chr17	81596116	81597316	-	NPLOC4	1	4	0	0	0	0	0	0	0	0	0	0	0	0	0	0	0	0	0	0	0	0	0	0	0	0	0	0	0	0	0	0.0104822	0	0	0	0	0	0	0	0	0	0	0	0	0
chr17	81596116	81600427	-	NPLOC4	1	2	0	0	0	0	0	0	0	0	0	0	0	0	0	0	0	0	0	0	0	0	0	0	0	0	0	0	0	0	0	0	0	0	0	0	0	0	0	0	0	0.005728	0	0	0
chr17	81596116	81606814	-	NPLOC4	1	1	0	0	0	0	0	0	0	0	0	0	0	0	0	0	0	0	0	0	0	0	0	0	0	0	0	0	0	0	0	0	0	0	0	0	0	0	0	0	0	0	0	0	0
chr17	81596116	81608822	-	NPLOC4	1	16	0	0	0.0155723	0	0	0.00897101	0.0104492	0	0	0	0	0	0	0.0290444	0	0	0.0104998	0	0	0	0	0.0355851	0	0	0	0.0384523	0	0	0	0	0.0102477	0	0	0	0	0	0	0	0	0	0	0	0
chr17	81600341	81608822	-	NPLOC4	1	2	0	0	0	0	0	0	0	0	0	0	0	0	0	0	0	0	0	0	0	0	0	0	0	0	0	0	0	0	0	0	0	0	0	0	0	0	0.0196896	0	0	0	0	0	0
chr17	81604548	81608822	-	NPLOC4	1	17	0	0	0	0	0	0	0	0	0	0	0	0	0	0.0145222	0	0	0.0209997	0	0	0.0177355	0.0210882	0	0	0.01967	0	0	0	0	0	0	0	0	0	0	0.0282301	0	0	0	0	0	0	0.0160121	0
chr17	81606691	81608822	-	NPLOC4	1	1	0	0	0	0	0	0	0	0	0	0	0	0	0	0	0	0	0	0	0	0	0	0	0	0	0	0	0	0	0	0	0	0	0	0	0	0	0	0	0	0	0	0	0
chr17	81610210	81622278	-	NPLOC4	1	2	0	0	0	0	0	0	0	0	0	0	0	0	0	0	0	0	0	0	0	0	0.0105441	0	0	0	0	0	0	0	0	0	0	0	0	0	0	0	0	0	0	0	0	0	0
chr17	81694853	81693654	+	HGS	1	3	0	0	0	0	0	0	0	0	0	0	0	0	0	0	0	0	0	0	0	0	0.0105441	0	0	0	0	0	0	0	0	0	0	0	0	0	0	0	0	0.00773231	0	0	0	0	0
chr10	106652382	106688338	-	SORCS1	1	3	0	0	0	0	0	0	0	0	0	0	0	0	0	0	0	0	0	0	0	0	0	0	0	0	0	0	0	0	0	0	0	0	0	0	0	0	0	0	0	0	0	0	0
chr10	76914936	76974573	-	KCNMA1	1	1	0	0	0	0	0	0	0	0	0	0	0	0	0	0	0	0	0	0	0	0	0	0	0	0	0	0	0	0	0	0	0	0	0	0	0	0	0	0	0	0	0	0.00800603	0
chr17	81717861	81716812	+	AC139530.2,SLC25A10	1	1	0	0	0	0	0	0	0.0104492	0	0	0	0	0	0	0	0	0	0	0	0	0	0	0	0	0	0	0	0	0	0	0	0	0	0	0	0	0	0	0	0	0	0	0	0
chr17	81855142	81855586	-	P4HB	1	18	0	0	0	0	0.0251472	0	0	0.0113022	0	0	0	0	0	0	0.0143092	0	0	0	0	0	0	0	0	0	0.0143901	0	0	0	0	0	0	0.0127873	0	0	0	0	0.0196896	0	0	0.011456	0	0.00800603	0
chr17	82157748	82179189	-	CCDC57	1	4	0	0	0	0	0	0	0	0	0	0	0	0	0	0	0	0	0	0	0	0	0	0	0	0	0	0	0	0	0	0	0	0	0	0	0	0	0	0	0	0	0	0.00800603	0
chr17	82171701	82188419	-	CCDC57	1	1	0	0	0	0	0	0	0	0	0	0	0	0	0	0	0	0	0	0	0	0	0.0105441	0	0	0	0	0	0	0	0	0	0	0	0	0	0	0	0	0	0	0	0	0	0
chr17	82178474	82179189	-	CCDC57	1	7	0	0	0	0	0	0	0	0	0	0	0	0	0	0	0	0	0.0104998	0	0	0	0	0	0	0	0	0	0.00847806	0	0	0	0	0	0	0	0	0	0	0.00773231	0	0	0	0	0
chr17	82183774	82188419	-	CCDC57	1	15	0	0	0	0	0	0	0	0	0	0	0	0	0	0.0290444	0	0	0	0	0.0207708	0	0	0	0	0	0	0	0	0	0	0	0.0102477	0.0127873	0	0	0	0	0	0.00773231	0	0.011456	0	0	0
chr17	82183774	82193830	-	CCDC57	1	2	0	0	0	0	0	0	0	0	0	0	0	0	0	0	0	0	0	0	0	0	0	0	0	0	0	0	0	0	0	0	0	0	0	0	0	0	0	0	0	0	0	0	0
chr17	82183774	82195364	-	CCDC57	1	8	0	0	0	0	0.0251472	0	0	0	0	0	0	0	0	0.0145222	0	0	0	0	0	0	0	0	0.0103481	0	0	0	0.00847806	0	0	0	0	0	0	0	0	0	0	0	0	0	0	0	0
chr17	82183774	82198422	-	CCDC57	1	2	0	0	0	0	0	0	0	0	0	0	0	0	0	0	0	0	0	0	0	0	0	0	0	0	0	0	0	0	0	0.0104822	0	0	0	0	0	0	0	0	0	0	0	0	0
chr17	82183774	82201952	-	CCDC57	1	1	0	0	0	0	0	0	0	0	0	0	0	0	0	0	0	0	0	0	0	0	0	0	0	0	0	0	0	0	0	0	0	0	0	0	0	0	0	0	0	0	0	0.00800603	0
chr10	76944773	76970067	-	KCNMA1	1	71	0	0.0367461	0	0	0	0.00897101	0.0104492	0.0226044	0	0.0162073	0	0.0274061	0.0390993	0.0145222	0	0.026796	0.0104998	0.0187576	0.0830832	0	0.0421765	0	0.0206962	0	0.0143901	0.0256349	0.0169561	0	0	0.0104822	0	0	0	0.0395013	0.0564602	0	0	0	0.0131307	0.034368	0	0	0
chr17	82193756	82195364	-	CCDC57	1	2	0	0	0	0	0	0	0	0	0	0	0	0	0	0	0	0	0	0	0	0	0	0	0	0	0	0	0	0	0	0	0	0	0	0	0	0	0	0	0	0	0	0	0
chr17	8238031	8238629	-	CTC1	1	90	0.0132985	0	0.0311446	0.0489018	0.0251472	0.026913	0.0313477	0.0339066	0.0430839	0.0324146	0	0	0	0.0435666	0.0143092	0.026796	0.0209997	0	0.0207708	0.0177355	0.0210882	0.0177926	0.0206962	0.01967	0.0287802	0	0.0169561	0.0148968	0	0.0314465	0	0	0.0300755	0.0197506	0.0282301	0.0174408	0	0.00773231	0	0.022912	0	0.00800603	0
chr17	8238031	8243148	-	CTC1	1	3	0	0	0	0	0	0	0	0	0	0	0	0	0	0	0	0	0	0	0	0	0	0	0	0	0	0.0128174	0	0	0	0	0	0	0	0	0	0	0	0	0	0	0	0	0
chr17	82472698	82459992	+	NARF	1	5	0	0	0	0	0	0	0	0.0113022	0	0	0	0	0	0	0	0	0	0	0	0	0	0	0	0	0	0	0	0	0	0	0.0102477	0	0	0	0	0	0	0	0	0	0	0	0
chr17	82568201	82563354	+	FOXK2	1	102	0	0	0.0778615	0.0489018	0.0251472	0.026913	0.0104492	0.0791155	0	0	0.0901913	0	0	0.0145222	0.0286185	0.013398	0.0209997	0.0281364	0.0207708	0.0177355	0.0632647	0.0177926	0.0206962	0	0.0287802	0.0640871	0.0339122	0.0297937	0.091211	0.0419287	0.0307431	0.102298	0	0	0.0846902	0.0174408	0.0590688	0.0231969	0.0131307	0.045824	0	0.0400301	0.030478
chr17	82571870	82563354	+	FOXK2	1	12	0	0	0	0.0244509	0	0	0	0	0.0215419	0	0	0	0	0	0	0.013398	0	0	0	0	0	0	0	0.0393401	0	0	0	0	0	0	0	0	0	0	0	0	0	0	0	0	0	0	0
chr17	82587272	82563354	+	FOXK2	1	1	0	0	0	0	0	0	0	0	0	0	0	0	0	0.0145222	0	0	0	0	0	0	0	0	0	0	0	0	0	0	0	0	0	0	0	0	0	0	0	0	0	0	0	0	0
chr17	82766368	82763965	+	TBCD	1	1	0	0	0	0	0	0.00897101	0	0	0	0	0	0	0	0	0	0	0	0	0	0	0	0	0	0	0	0	0	0	0	0	0	0	0	0	0	0	0	0	0	0	0	0	0
chr17	82768566	82756165	+	TBCD	1	5	0	0	0	0	0	0	0	0	0	0	0	0	0	0	0	0	0	0	0	0	0	0	0	0	0	0	0.00847806	0	0	0	0	0	0	0	0	0	0	0	0	0.005728	0	0	0
chr17	82768566	82763965	+	TBCD	1	4	0	0	0	0	0	0	0	0	0	0	0	0	0	0	0	0	0	0	0	0	0	0	0	0	0	0	0	0	0	0.0104822	0	0	0	0	0	0	0	0	0	0	0	0	0
chr10	76944773	76974573	-	KCNMA1	1	3	0	0	0	0	0	0	0	0	0	0	0.0225478	0	0	0	0	0	0	0	0	0	0	0	0	0	0	0	0	0	0	0	0	0	0	0	0	0	0	0	0	0	0	0	0
chr17	82772507	82756165	+	TBCD	1	1	0	0	0	0	0	0	0	0	0	0	0	0	0	0	0	0	0	0	0	0	0	0	0	0	0	0	0	0	0	0	0	0	0	0	0	0	0	0	0	0	0	0	0
chr17	82772507	82763965	+	TBCD	1	7	0	0.018373	0	0	0	0	0	0	0	0	0	0	0	0	0	0	0	0	0	0	0	0	0.0103481	0	0	0	0	0	0	0	0	0	0	0	0	0	0	0	0.0131307	0	0	0	0
chr17	82781721	82756165	+	TBCD	1	6	0	0	0	0	0	0	0	0	0	0	0	0	0	0	0	0	0	0.00937882	0	0	0	0	0	0	0	0	0	0.0148968	0	0	0	0	0	0	0	0	0	0	0	0	0	0	0
chr17	82781721	82763965	+	TBCD	1	81	0.0132985	0.018373	0.0311446	0	0	0.00897101	0.0104492	0	0.0646258	0.0324146	0.0676435	0.013703	0	0.0145222	0.0143092	0.013398	0.0104998	0	0.0207708	0.0177355	0.0210882	0	0	0.01967	0	0.0256349	0	0	0.0456055	0.0209643	0	0.0127873	0	0.0197506	0.0282301	0.0348817	0.0196896	0.0231969	0	0.011456	0.0191802	0.0320241	0.015239
chr17	82809782	82797757	+	TBCD	1	1	0	0	0	0	0	0	0	0	0	0	0	0	0	0	0	0	0	0	0	0	0	0	0	0	0	0	0	0	0	0	0	0	0	0	0	0	0	0	0	0	0	0.00800603	0
chr17	82870380	82797757	+	TBCD	1	1	0	0	0	0	0	0.00897101	0	0	0	0	0	0	0	0	0	0	0	0	0	0	0	0	0	0	0	0	0	0	0	0	0	0	0	0	0	0	0	0	0	0	0	0	0
chr17	82893632	82797757	+	TBCD	1	1	0	0	0	0	0	0	0	0	0	0	0	0	0	0	0	0	0	0	0	0	0	0	0	0	0	0	0	0	0	0	0	0	0	0	0	0	0	0	0	0	0	0	0
chr17	82893632	82870224	+	TBCD	1	7	0	0	0	0	0	0	0	0	0	0	0	0.013703	0	0	0.0143092	0	0	0	0	0	0	0	0.0103481	0	0	0	0.00847806	0	0	0	0	0	0	0	0	0	0	0	0	0	0	0	0
chr17	82900731	82870224	+	TBCD	1	6	0.0132985	0	0	0	0	0	0	0	0	0	0	0	0	0	0	0	0	0	0	0	0.0105441	0	0	0	0	0	0	0	0.0152018	0	0	0	0	0	0	0	0	0	0	0	0	0	0
chr17	82900731	82884145	+	TBCD	1	2	0	0	0	0	0	0	0	0	0	0	0	0	0	0	0	0	0.0104998	0	0	0	0	0	0	0	0	0	0	0	0	0	0	0	0	0	0	0	0	0	0	0	0	0	0
chr10	76944773	77012043	-	KCNMA1	1	2	0	0	0	0	0	0	0	0	0	0	0	0	0	0	0	0	0	0	0	0	0	0	0	0	0	0	0	0	0	0	0	0	0	0	0	0	0	0	0	0	0	0	0
chr17	82903478	82870224	+	TBCD	1	14	0	0	0	0	0.0251472	0	0	0	0	0	0	0	0	0	0	0	0	0	0	0	0	0	0	0	0	0	0	0	0	0.0104822	0	0	0	0	0	0	0	0	0	0	0	0	0
chr17	82903478	82884145	+	TBCD	1	14	0	0	0	0	0	0	0	0	0	0	0	0	0	0	0	0	0	0	0	0	0	0	0	0	0	0	0	0	0	0	0	0	0	0	0	0.0174408	0	0	0	0	0	0	0
chr17	82903478	82900651	+	TBCD	1	1	0	0	0	0	0	0	0	0	0	0	0	0	0	0	0	0	0	0	0	0	0	0	0	0	0	0	0	0	0	0	0	0	0	0	0	0	0	0	0	0.005728	0	0	0
chr17	82906053	82814840	+	TBCD	1	1	0	0	0	0	0	0	0	0	0	0	0	0	0	0	0	0	0	0	0	0	0	0	0	0	0	0	0	0	0	0	0	0	0	0	0	0	0	0	0.0131307	0	0	0	0
chr17	82906053	82870224	+	TBCD	1	1	0	0	0	0	0	0	0	0	0	0	0	0	0	0	0	0	0	0	0	0	0	0	0	0	0	0	0	0	0.0152018	0	0	0	0	0	0	0	0	0	0	0	0	0	0
chr17	82907821	82884145	+	TBCD	1	1	0	0	0	0	0	0	0.0104492	0	0	0	0	0	0	0	0	0	0	0	0	0	0	0	0	0	0	0	0	0	0	0	0	0	0	0	0	0	0	0	0	0	0	0	0
chr17	82909307	82900651	+	TBCD	1	3	0	0	0	0	0	0	0	0	0	0	0	0	0	0	0	0	0	0	0	0	0	0	0.0206962	0	0.0143901	0	0	0	0	0	0	0	0	0	0	0	0	0	0	0	0	0	0
chr17	82911789	82870224	+	TBCD	1	15	0	0	0	0	0	0	0	0	0	0.0162073	0	0	0	0	0.0143092	0	0	0	0.0207708	0	0	0	0	0	0	0	0.00847806	0	0	0	0	0	0	0	0	0	0	0	0	0.005728	0	0	0
chr17	82911789	82884145	+	TBCD	1	10	0	0	0	0	0	0.00897101	0	0	0	0	0	0.0274061	0	0	0	0.013398	0	0.00937882	0	0	0	0	0.0206962	0.01967	0	0	0	0	0	0	0	0	0	0	0	0	0	0	0	0	0	0	0
chr17	82911789	82889668	+	TBCD	1	5	0.0132985	0	0	0	0	0	0	0	0	0	0	0	0	0	0	0	0	0	0	0	0	0	0	0	0	0	0	0	0	0	0	0.0127873	0	0	0	0	0	0	0	0	0	0	0
chr10	76949142	76970067	-	KCNMA1	1	3	0	0	0	0	0	0	0	0	0	0	0	0	0	0	0	0	0.0104998	0	0	0	0	0	0	0	0	0	0	0	0	0	0	0	0	0	0	0	0	0	0	0	0	0	0
chr17	82911789	82893547	+	TBCD	1	1	0	0	0	0	0	0	0	0	0.0215419	0	0	0	0	0	0	0	0	0	0	0	0	0	0	0	0	0	0	0	0	0	0	0	0	0	0	0	0	0	0	0	0	0	0
chr17	82911789	82900651	+	TBCD	1	30	0	0	0.0155723	0	0	0	0	0	0	0.0162073	0	0	0	0.0290444	0	0	0.0104998	0	0	0	0	0	0	0	0	0	0	0	0	0	0	0	0	0	0	0	0	0.00773231	0	0.005728	0	0	0
chr17	83005115	83035099	-	B3GNTL1	1	1	0	0	0	0	0	0	0	0	0	0	0	0	0	0	0	0	0	0	0	0	0.0105441	0	0	0	0	0	0	0	0	0	0	0	0	0	0	0	0	0	0	0	0	0	0
chr17	83035035	83048785	-	B3GNTL1	1	7	0	0	0	0	0	0	0	0	0	0	0	0	0	0	0	0	0	0	0	0	0	0	0	0	0	0	0.00847806	0	0	0	0	0	0	0	0	0	0	0	0	0	0	0	0
chr17	83048471	83048785	-	B3GNTL1	1	2	0	0	0	0	0	0	0	0	0	0	0	0	0	0	0	0	0	0	0.0207708	0	0	0	0	0	0	0	0	0	0	0	0	0	0	0	0	0	0	0	0	0	0	0	0
chr1	7837149	7793960	+	PER3	1	1	0	0	0	0	0	0	0	0	0	0	0	0	0	0	0	0	0	0	0	0	0	0	0	0	0	0	0	0	0	0	0	0	0	0	0	0	0	0	0	0	0	0	0
chr1	7837149	7835762	+	PER3	1	36	0	0.018373	0	0	0	0.00897101	0	0	0	0	0	0.0274061	0	0	0	0	0	0.00937882	0.0623124	0	0	0	0	0	0.0287802	0.0128174	0.00847806	0	0.0304037	0	0	0	0	0	0	0	0	0.0309292	0	0	0	0.0160121	0
chr17	8460160	8444260	+	NDEL1	1	3	0	0	0	0	0	0	0	0	0	0	0	0	0	0	0	0	0	0	0	0	0	0	0.0103481	0	0	0.0128174	0	0	0	0	0	0	0	0	0	0	0	0	0	0	0	0.00800603	0
chr17	8493733	8495241	-	MYH10	1	12	0	0	0	0	0	0.00897101	0	0	0	0	0	0	0	0.0145222	0	0	0	0	0	0	0	0	0	0	0.0287802	0	0	0	0	0	0	0	0	0	0	0	0	0	0	0	0	0	0
chr17	8504694	8509949	-	MYH10	1	1	0	0	0	0	0	0	0	0	0	0	0	0	0	0	0	0	0	0	0	0	0	0	0	0	0	0	0	0	0	0	0	0	0	0	0	0.0174408	0	0	0	0	0	0	0
chr10	76949142	77012043	-	KCNMA1	1	4	0	0	0	0	0	0	0	0	0	0	0	0	0	0.0145222	0	0	0	0.0187576	0	0	0	0	0	0	0	0	0	0.0297937	0	0	0	0	0	0	0	0	0	0	0	0	0	0	0
chr17	8506318	8509949	-	MYH10	1	47	0.0132985	0	0.0934339	0	0.0251472	0	0	0.0113022	0.0215419	0	0	0	0	0.0871333	0.0286185	0.026796	0.0209997	0	0	0	0.0210882	0	0	0.01967	0	0	0	0.0297937	0	0.0209643	0	0.051149	0	0.0197506	0	0	0.0196896	0	0.0131307	0	0	0	0
chr17	8508554	8509949	-	MYH10	1	16	0	0	0	0	0	0	0.0104492	0	0	0	0.0225478	0	0	0	0	0	0	0	0	0	0	0	0	0	0.0143901	0.0128174	0	0.0148968	0	0	0	0	0	0	0.0282301	0	0	0	0	0	0	0.0240181	0
chr17	8518631	8535931	-	MYH10	1	3	0	0	0	0	0	0	0	0	0	0	0	0	0	0	0	0	0	0	0	0	0.0105441	0	0	0	0	0	0	0	0	0	0	0	0	0	0	0	0	0	0	0	0.0191802	0	0
chr17	8520878	8535931	-	MYH10	1	1	0	0	0	0	0	0	0	0	0	0	0	0	0	0.0145222	0	0	0	0	0	0	0	0	0	0	0	0	0	0	0	0	0	0	0	0	0	0	0	0	0	0	0	0	0
chr17	8542107	8554018	-	MYH10	1	4	0	0	0.0155723	0	0	0	0	0	0	0	0	0	0	0	0	0	0	0	0	0	0	0	0	0	0	0	0	0	0	0	0	0	0	0	0	0	0	0	0	0	0	0	0
chr17	8552046	8569812	-	MYH10	1	2	0	0	0	0	0	0	0	0	0	0	0	0	0	0	0	0	0.0104998	0	0	0	0	0	0	0	0	0	0	0	0	0	0	0	0	0	0	0	0	0	0	0	0	0	0
chr17	8552046	8577338	-	MYH10	1	7	0	0	0	0	0.0251472	0	0	0	0	0	0	0	0	0	0	0	0	0	0	0	0	0	0	0	0	0	0.00847806	0	0	0	0	0	0	0	0	0	0	0	0	0	0	0	0
chr17	8569720	8577338	-	MYH10	1	52	0	0	0	0	0.0251472	0.00897101	0.0208984	0.0339066	0	0.0162073	0	0	0.0195497	0	0.0143092	0.013398	0.0419994	0	0.0207708	0	0	0	0.0103481	0.01967	0	0.0128174	0	0.0148968	0	0.0314465	0.0204954	0.0127873	0	0	0	0.0523225	0	0.0154646	0	0.005728	0	0.00800603	0
chr17	8589081	8623497	-	MYH10	1	2	0	0	0	0	0	0	0	0	0	0	0	0	0	0	0	0	0	0	0	0	0	0	0	0	0	0	0	0	0	0	0	0	0	0	0	0	0	0	0	0	0	0.00800603	0
chr17	9600183	9586698	+	CFAP52	1	2	0	0.018373	0	0	0	0	0	0	0	0	0	0	0	0	0	0	0	0	0	0	0	0	0	0	0	0	0	0	0	0	0	0	0	0	0	0	0	0	0	0	0	0	0
chr10	76953801	77079550	-	KCNMA1	1	1	0	0	0	0	0	0	0	0	0	0	0	0	0	0	0	0	0	0	0	0	0	0	0	0	0	0	0	0	0	0	0	0	0	0	0	0	0	0	0	0	0	0	0
chr17	9600183	9598234	+	CFAP52	1	2	0	0	0	0	0	0	0	0	0	0	0	0	0	0	0	0	0	0	0	0	0	0	0	0	0	0	0	0	0	0	0	0	0	0	0	0	0	0	0	0	0	0	0
chr17	9693230	9656403	+	USP43	1	1	0	0	0	0	0	0	0	0	0	0	0	0	0	0	0	0	0	0	0	0	0	0	0	0	0	0	0	0	0	0	0	0	0	0	0	0	0	0	0	0.005728	0	0	0
chr17	9693230	9674891	+	USP43	1	3	0	0	0	0	0	0	0	0	0	0	0	0	0	0	0	0	0	0	0	0	0	0	0	0	0	0	0	0	0	0	0	0	0	0	0	0	0	0	0	0	0	0	0
chr17	9712132	9709956	+	USP43	1	2	0	0	0	0	0	0	0	0	0	0	0	0	0	0	0	0	0	0	0	0	0	0	0	0	0	0	0	0.0148968	0	0	0	0	0	0	0	0	0	0	0	0	0	0	0
chr17	9925476	9926769	-	GAS7	1	2	0	0	0	0	0	0	0	0	0	0	0	0	0	0.0145222	0	0	0	0	0	0	0	0	0	0	0	0	0	0	0	0	0	0	0	0	0	0	0	0	0	0	0	0	0
chr17	9925476	9946983	-	GAS7	1	2	0	0	0	0	0	0	0	0	0	0	0	0	0	0	0	0	0	0	0	0	0	0	0	0	0	0	0	0	0	0	0	0	0	0	0	0	0	0	0	0	0	0	0
chr17	9925476	9959255	-	GAS7	1	1	0	0	0	0	0	0	0	0	0	0	0	0	0	0	0	0	0	0	0	0	0	0	0	0.01967	0	0	0	0	0	0	0	0	0	0	0	0	0	0	0	0	0	0	0
chr17	9926641	9959255	-	GAS7	1	3	0	0	0	0	0	0	0	0	0	0	0	0	0	0	0	0	0	0	0	0	0	0	0	0	0	0	0	0	0	0	0	0	0	0	0	0	0	0	0	0	0	0	0
chr17	9940126	9946983	-	GAS7	1	130	0.0664927	0.0918652	0.0622892	0.0489018	0.17603	0.0448551	0.0626953	0.0791155	0.172335	0.0486218	0.135287	0.109624	0.0977483	0.145222	0.057237	0.0937859	0.0314995	0.0375153	0.103854	0.0532064	0.137074	0.0533777	0.0724367	0.0983502	0.172681	0.115357	0.186517	0	0.0608073	0.062893	0.102477	0.14066	0.180453	0.158005	0.0564602	0.0697634	0.137827	0.0541262	0.0393921	0.11456	0.172622	0.128096	0.0609559
chr17	9940126	9959255	-	GAS7	1	3	0	0	0	0	0	0	0	0	0	0	0	0	0	0	0	0	0	0	0	0	0	0	0	0	0	0	0	0	0	0	0	0	0	0	0	0	0	0	0	0	0.0383604	0	0
chr10	76969974	76974573	-	KCNMA1	1	11	0	0.018373	0.0155723	0	0	0	0	0	0	0	0	0	0	0	0	0	0	0	0.0207708	0	0	0	0	0	0	0	0	0	0	0	0	0	0	0	0	0	0	0	0	0.005728	0	0	0
chr17	9943121	9959255	-	GAS7	1	1	0	0	0	0	0	0	0	0	0	0	0	0	0	0	0	0	0	0	0	0	0	0	0	0	0	0	0	0.178762	0	0	0	0	0	0	0	0	0	0	0	0	0	0	0
chr18	10759482	10773629	-	PIEZO2	1	32	0	0.018373	0	0	0	0.017942	0	0.0113022	0	0	0	0.013703	0.058649	0	0	0	0	0	0	0	0.0105441	0	0	0	0	0	0.0169561	0	0	0	0.0102477	0	0	0.0395013	0	0	0	0	0	0	0	0	0.015239
chr18	1159398	1133843	+	AP005328.1	1	1	0	0	0	0	0	0	0	0	0	0	0	0	0	0	0	0	0	0	0	0	0	0	0	0	0	0	0	0	0	0	0	0	0	0	0	0	0	0	0	0	0	0	0
chr18	1162853	1133843	+	AP005328.1	1	7	0	0	0	0	0	0	0	0.0113022	0	0	0	0	0	0	0	0	0	0	0	0	0	0	0	0	0	0	0	0	0	0.0104822	0	0	0	0	0.0282301	0	0	0	0	0.005728	0	0	0
chr18	11753945	11752853	+	GNAL	1	2	0	0	0	0	0	0	0	0	0	0	0	0	0	0	0	0	0	0	0	0	0	0	0	0	0	0	0	0	0	0	0	0	0	0	0	0	0	0	0	0.005728	0	0	0
chr18	11868663	11862395	+	GNAL	1	1	0	0	0	0	0	0	0	0	0	0	0	0	0	0.0145222	0	0	0	0	0	0	0	0	0	0	0	0	0	0	0	0	0	0	0	0	0	0	0	0	0	0	0	0	0
chr18	11876688	11862395	+	GNAL	1	2	0	0	0	0	0	0	0	0	0	0	0	0	0	0.0145222	0	0	0	0	0	0	0	0	0	0	0	0	0	0	0	0	0	0	0	0	0	0	0	0	0	0	0	0	0
chr18	12353005	12356831	-	AFG3L2	1	20	0	0.0367461	0	0	0	0	0.0104492	0.0113022	0	0	0	0	0	0	0	0	0.0104998	0	0	0	0	0	0	0	0.0287802	0	0	0	0	0	0	0	0	0	0	0	0	0	0	0	0	0	0
chr18	12356694	12360051	-	AFG3L2	1	4	0	0	0	0	0	0	0	0	0	0	0	0	0.0195497	0	0	0	0	0	0	0	0	0	0	0	0	0	0	0	0	0	0	0	0	0	0	0	0	0	0	0	0	0	0
chr18	12356694	12363856	-	AFG3L2	1	1	0	0	0	0	0	0	0	0	0	0	0	0	0	0	0	0	0	0	0	0	0	0.0177926	0	0	0	0	0	0	0	0	0	0	0	0	0	0	0	0	0	0	0	0	0
chr10	76969974	77012043	-	KCNMA1	1	1	0	0	0	0	0	0	0	0	0	0	0	0	0	0	0	0	0	0	0	0	0	0	0	0	0	0	0	0	0	0	0	0	0	0	0	0	0	0	0	0	0	0	0
chr18	12358670	12360051	-	AFG3L2	1	2	0	0	0	0	0	0	0	0	0	0	0	0	0	0	0	0	0	0	0	0	0	0	0	0	0	0	0	0	0	0	0	0	0	0	0	0	0	0	0	0	0	0	0
chr18	12358670	12371691	-	AFG3L2	1	1	0	0	0	0	0	0	0	0	0	0	0	0	0	0	0	0	0	0.00937882	0	0	0	0	0	0	0	0	0	0	0	0	0	0	0	0	0	0	0	0	0	0	0	0	0
chr18	12366965	12370926	-	AFG3L2	1	4	0	0	0	0	0	0.00897101	0	0	0	0	0	0	0	0	0	0	0	0	0	0	0	0	0	0	0	0	0	0	0	0	0	0	0	0	0	0	0	0	0	0	0	0	0
chr18	12366965	12371691	-	AFG3L2	1	27	0	0.0367461	0	0	0	0	0	0	0	0.0162073	0	0.0274061	0	0	0	0	0.0209997	0	0	0	0	0	0	0	0	0	0	0	0.0152018	0	0	0	0	0	0	0	0	0.00773231	0.0131307	0.005728	0	0.0240181	0
chr18	12421629	12420325	+	PRELID3A	1	1	0	0	0	0	0	0	0	0	0	0	0	0	0	0.0145222	0	0	0	0	0	0	0	0	0	0	0	0	0	0	0	0	0	0	0	0	0	0	0	0	0	0	0	0	0
chr18	12463351	12464958	-	SPIRE1	1	24	0	0	0	0	0	0.00897101	0	0	0	0	0.0225478	0	0	0	0	0	0.0104998	0.0187576	0.0415416	0.0177355	0	0	0	0	0	0.0384523	0.00847806	0	0	0	0.0102477	0.0127873	0	0	0	0	0.0196896	0.00773231	0	0.005728	0	0	0
chr18	12463351	12479871	-	SPIRE1	1	3	0	0	0	0	0	0	0	0	0	0	0	0	0	0	0	0	0	0	0	0	0	0	0	0	0	0	0	0	0	0	0	0	0	0	0	0	0	0	0	0	0	0	0
chr18	12463351	12496102	-	SPIRE1	1	4	0	0	0	0	0	0	0	0	0	0	0	0	0	0	0	0	0	0	0	0	0	0	0	0	0	0	0.00847806	0	0	0	0	0	0	0	0	0	0	0	0	0.011456	0	0	0
chr18	12479699	12506641	-	SPIRE1	1	6	0	0	0	0	0	0	0	0	0	0	0	0	0.0195497	0	0	0	0	0	0	0	0	0	0	0	0	0.0128174	0	0	0	0	0	0	0	0	0	0	0	0	0	0	0	0	0
chr18	12479699	12635096	-	SPIRE1	1	1	0	0	0	0	0	0	0	0	0	0	0	0	0	0	0	0	0	0	0	0	0	0	0	0	0	0	0	0	0	0	0	0	0	0	0	0	0.0196896	0	0	0	0	0	0
chr10	76969974	77019099	-	KCNMA1	1	1	0	0	0	0	0	0	0	0	0	0	0	0	0	0	0	0	0	0	0	0	0	0	0	0	0	0	0.00847806	0	0	0	0	0	0	0	0	0	0	0	0	0	0	0	0
chr18	12485959	12506641	-	SPIRE1	1	2	0	0	0	0	0	0	0	0	0	0	0	0	0	0	0	0	0	0	0	0	0	0	0	0.01967	0	0	0	0	0	0	0	0	0	0	0	0	0	0	0	0	0	0	0
chr18	12485959	12512531	-	SPIRE1	1	1	0	0	0	0	0	0	0	0	0	0	0	0	0	0	0	0	0	0.00937882	0	0	0	0	0	0	0	0	0	0	0	0	0	0	0	0	0	0	0	0	0	0	0	0	0
chr18	12485959	12635096	-	SPIRE1	1	2	0	0	0	0	0	0	0	0	0	0	0	0	0	0	0	0	0	0	0	0	0	0	0	0	0	0	0	0	0	0	0	0	0	0	0	0	0	0	0	0	0.0191802	0	0
chr18	12493072	12496102	-	SPIRE1	1	9	0	0	0	0	0	0	0	0	0	0	0	0	0	0.0145222	0	0.013398	0	0	0	0	0	0	0	0	0	0	0	0	0	0	0	0	0	0	0	0	0	0	0	0	0	0	0
chr18	12493072	12506641	-	SPIRE1	1	2	0	0	0	0	0	0.00897101	0	0	0	0	0	0	0	0	0	0	0	0	0	0	0	0	0	0	0	0	0	0	0	0	0	0	0	0	0	0	0	0	0	0	0	0	0
chr18	12493072	12546904	-	SPIRE1	1	16	0	0	0.0467169	0	0	0	0	0	0	0	0	0.013703	0.0195497	0	0	0	0.0104998	0	0	0	0	0	0	0	0	0	0	0.0148968	0	0	0	0.0127873	0	0	0	0	0	0	0.0131307	0	0	0	0
chr18	12506477	12506641	-	SPIRE1	1	5	0	0	0	0	0	0	0	0	0	0	0	0	0	0	0	0	0	0	0	0	0	0	0	0	0	0	0	0	0	0	0	0.0127873	0	0	0	0	0	0	0	0	0	0	0
chr18	12506477	12512531	-	SPIRE1	1	2	0	0	0	0	0	0	0	0	0	0	0	0	0	0	0	0	0	0	0	0	0.0105441	0	0	0	0	0	0	0	0	0	0	0	0	0	0	0	0	0	0	0	0	0	0
chr18	12506477	12535601	-	SPIRE1	1	4	0	0	0	0	0	0	0	0	0	0	0	0	0	0	0	0	0	0	0	0	0	0	0	0.01967	0	0	0	0	0	0	0	0	0	0	0	0	0	0	0	0	0	0	0
chr18	12506477	12546904	-	SPIRE1	1	5	0	0	0	0	0	0	0	0	0	0	0	0	0	0	0	0	0	0	0	0	0	0	0.0103481	0	0	0	0	0	0	0	0	0	0	0	0	0	0	0	0	0	0	0	0
chr10	106688192	106709341	-	SORCS1	1	22	0	0	0	0	0	0	0.0104492	0	0	0	0	0	0	0	0	0	0	0	0.0207708	0	0.0421765	0	0	0	0.0143901	0.0128174	0	0	0	0	0	0	0	0	0	0	0.0196896	0	0	0	0	0	0
chr10	76969974	77027891	-	KCNMA1	1	9	0	0	0	0	0	0	0	0	0	0	0	0	0	0	0	0	0	0	0	0	0.0210882	0	0	0	0	0.0128174	0	0	0	0	0	0	0	0	0	0	0.0196896	0	0	0	0	0	0
chr18	12506477	12635096	-	SPIRE1	1	21	0.0132985	0	0.0155723	0	0	0	0	0	0.0215419	0	0	0	0	0	0	0	0	0	0	0	0	0	0	0	0	0.0128174	0.00847806	0	0	0	0.0102477	0	0	0	0	0	0	0	0	0.005728	0	0	0
chr18	12535476	12546904	-	SPIRE1	1	2	0	0	0	0	0	0	0	0	0	0	0	0	0	0	0	0	0	0	0	0	0	0	0	0	0	0	0	0	0	0	0	0	0	0	0	0	0	0	0	0	0	0	0
chr18	12535476	12635096	-	SPIRE1	1	27	0	0	0.0155723	0	0	0	0	0	0	0.0162073	0	0	0	0.0435666	0	0	0	0	0	0	0.0210882	0	0	0	0.0143901	0.0128174	0	0	0	0	0	0.0127873	0	0	0	0.0348817	0	0.0154646	0	0	0	0	0
chr18	12546674	12546904	-	SPIRE1	1	1	0	0	0	0	0	0	0	0	0	0	0	0	0	0	0	0	0	0	0	0	0	0	0	0	0	0	0	0	0	0.0104822	0	0	0	0	0	0	0	0	0	0	0	0	0
chr18	13008631	12999421	+	CEP192	1	1	0	0	0	0	0	0	0	0	0	0	0	0	0	0	0	0	0	0	0	0	0	0	0	0	0	0	0	0	0	0	0	0	0	0	0	0	0	0	0	0	0	0	0
chr18	13019206	12999421	+	CEP192	1	82	0.0132985	0	0	0	0.0251472	0	0.0104492	0.0226044	0.0646258	0	0	0.0411091	0	0.0435666	0.0286185	0.013398	0.0314995	0.00937882	0.0415416	0	0.0738089	0	0.0724367	0	0.0143901	0.0128174	0.0423903	0	0.0152018	0.0104822	0.0307431	0.0127873	0	0.0395013	0	0.0872042	0.0590688	0.00773231	0	0.02864	0.0191802	0.00800603	0
chr18	13019206	13012973	+	CEP192	1	1	0	0	0	0	0	0	0	0	0	0	0	0	0	0	0	0	0.0104998	0	0	0	0	0	0	0	0	0	0	0	0	0	0	0	0	0	0	0	0	0	0	0	0	0	0
chr18	13030608	12999421	+	CEP192	1	47	0	0	0.0778615	0	0.0251472	0.00897101	0.0104492	0	0	0	0.0225478	0.013703	0	0.0290444	0	0	0	0.00937882	0	0.0177355	0.0105441	0	0	0.01967	0.0143901	0.0128174	0.0254342	0	0	0.0209643	0	0.0127873	0.0300755	0	0	0	0	0.00773231	0	0.011456	0.0191802	0	0
chr18	13040956	12999421	+	CEP192	0		0	0	0	0	0	0	0	0	0	0	0	0	0	0	0	0	0	0	0	0	0	0	0	0	0	0	0	0	0	0	0	0	0	0	0	0	0	0	0	0	0	0	0
chr18	13059312	12999421	+	CEP192	1	5	0	0	0	0	0	0	0	0	0.0430839	0	0	0	0.0195497	0	0	0	0	0	0	0	0	0	0	0	0	0	0	0	0	0	0	0	0	0	0	0	0	0	0	0	0	0	0
chr10	76969974	77079550	-	KCNMA1	1	4	0	0	0	0	0	0	0	0	0	0	0	0	0	0	0	0	0	0.00937882	0	0	0	0	0	0	0	0	0	0	0	0	0	0	0	0	0	0	0	0	0	0	0	0	0
chr18	13059312	13029663	+	CEP192	1	3	0	0	0	0	0	0	0	0.0113022	0	0	0	0	0	0	0	0	0	0	0	0	0	0	0	0	0	0	0	0	0	0.0104822	0	0	0	0	0	0	0	0	0.0131307	0	0	0	0
chr18	13059312	13048859	+	CEP192	1	25	0	0	0	0	0	0	0	0	0	0	0.0450957	0	0	0.0145222	0	0	0.0104998	0.00937882	0	0	0.0105441	0	0	0	0	0	0	0	0	0	0	0.0127873	0	0	0	0	0.0590688	0.0231969	0	0	0	0.0160121	0
chr18	13073185	13048859	+	CEP192	1	3	0	0	0	0	0	0	0	0	0	0	0	0	0	0	0	0	0	0	0	0	0	0	0	0	0	0	0	0	0	0	0	0	0	0.0197506	0	0	0	0	0	0	0	0	0
chr18	13100512	13067831	+	CEP192	1	1	0	0	0	0	0	0	0	0	0	0	0	0	0	0	0	0	0	0	0	0	0	0	0	0	0	0	0	0	0	0	0	0	0	0	0	0	0	0	0	0	0	0	0
chr18	13103588	13099476	+	CEP192	1	5	0	0	0.0155723	0	0	0.00897101	0	0	0	0	0	0	0	0.0145222	0	0	0	0	0	0	0	0	0	0	0	0	0.00847806	0	0	0	0	0	0	0	0	0	0	0	0	0	0	0	0
chr18	13117643	12999421	+	CEP192	1	5	0	0	0	0	0	0	0	0	0	0	0	0	0	0	0	0	0	0	0	0	0	0	0.0103481	0	0	0	0	0	0	0	0	0	0	0	0	0	0	0	0	0	0	0.0160121	0
chr18	13387762	13278105	+	LDLRAD4	1	21	0.0132985	0	0	0	0	0	0	0	0.0430839	0	0	0	0	0	0	0	0	0	0	0	0.0105441	0.0177926	0	0	0	0	0.00847806	0	0	0	0	0.0255745	0	0	0	0	0.0393792	0.0231969	0	0	0	0	0
chr18	13387762	13387341	+	LDLRAD4	1	5	0	0	0	0	0	0	0	0	0	0	0	0	0	0.0145222	0	0	0	0	0	0	0	0	0	0	0	0	0	0	0	0	0	0	0	0	0	0	0	0	0	0.005728	0	0	0
chr18	13438384	13278105	+	LDLRAD4	1	16	0	0.018373	0	0	0	0	0	0	0	0	0	0	0	0.0145222	0	0	0	0.00937882	0	0.0177355	0	0	0	0	0	0	0	0	0	0	0	0	0	0	0	0	0	0	0	0	0	0	0
chr18	13438384	13387341	+	LDLRAD4	1	13	0	0	0	0	0	0	0	0	0.0215419	0	0	0	0	0	0	0	0	0	0	0	0	0	0	0	0	0	0	0.0148968	0	0	0	0	0	0	0	0	0	0	0	0	0	0.00800603	0
chr10	77008185	77027891	-	KCNMA1	1	3	0.0132985	0	0	0	0	0	0	0	0	0	0	0	0	0.0145222	0	0	0	0	0	0	0	0	0	0	0	0	0.00847806	0	0	0	0	0	0	0	0	0	0	0	0	0	0	0	0
chr18	13681605	13682105	-	FAM210A	1	52	0	0.0367461	0.0155723	0	0.0251472	0.00897101	0	0.0113022	0	0.0162073	0	0	0.0195497	0.0145222	0	0.013398	0.0104998	0.00937882	0	0	0.0105441	0	0.0310443	0	0	0.0128174	0.0254342	0.0297937	0.0152018	0	0.0102477	0.0127873	0	0	0.0282301	0	0	0.00773231	0.0131307	0.005728	0	0.0160121	0
chr18	13731934	13731476	+	RNMT	1	2	0	0	0	0	0	0	0	0	0	0	0	0	0	0	0	0	0	0	0	0	0	0	0	0	0	0	0	0	0	0	0	0	0	0	0	0	0	0	0	0.005728	0	0	0
chr18	13754147	13730627	+	RNMT	1	27	0	0	0	0	0	0.00897101	0.0104492	0	0	0	0.0225478	0.0274061	0	0	0	0	0	0	0	0	0	0	0	0.01967	0	0.0128174	0	0	0	0	0	0	0	0	0.0282301	0.0174408	0.0196896	0	0	0.011456	0	0.0160121	0
chr18	13754147	13731476	+	RNMT	1	2	0	0	0	0	0	0	0	0	0	0	0	0	0	0	0	0	0	0	0	0	0.0105441	0	0	0	0	0	0	0	0	0	0	0	0	0	0	0	0	0	0	0	0	0	0
chr18	14077329	14085076	-	ZNF519	1	5	0	0	0	0	0	0	0	0	0	0	0	0	0	0	0	0	0	0	0	0	0	0	0	0	0	0	0	0	0	0	0	0	0	0.0197506	0	0.0174408	0.0196896	0	0	0	0	0	0
chr18	14764090	14754899	+	ANKRD30B	1	1	0	0	0	0	0	0	0	0	0	0	0	0	0	0	0	0	0	0	0	0	0	0	0	0	0	0	0	0	0	0	0	0	0	0	0	0	0	0	0	0	0	0	0
chr18	14764090	14763686	+	ANKRD30B	1	1	0	0	0	0	0	0	0	0	0	0	0	0	0	0	0	0	0	0	0	0	0	0	0	0	0	0	0	0	0.0152018	0	0	0	0	0	0	0	0	0	0	0	0	0	0
chr18	166819	163308	+	USP14	1	1	0	0	0	0	0	0	0	0	0	0	0	0	0	0	0	0	0	0	0	0	0	0	0	0	0	0	0	0.0297937	0	0	0	0	0	0	0	0	0	0	0	0	0	0	0
chr1	81907230	81836885	+	ADGRL2	1	22	0	0	0	0	0	0	0	0	0	0	0	0	0	0	0	0	0	0	0	0	0.0105441	0	0	0	0	0.0128174	0	0	0	0	0.0102477	0	0	0	0.0564602	0	0.0196896	0	0	0.011456	0	0.00800603	0
chr1	81953025	81942034	+	ADGRL2	1	9	0	0	0	0	0.0251472	0.00897101	0	0	0	0	0	0	0	0	0	0	0	0	0.0207708	0	0.0105441	0	0	0	0	0	0	0	0	0	0	0	0	0	0	0	0	0	0	0	0	0	0.015239
chr10	77011967	77027891	-	KCNMA1	1	10	0	0	0	0	0	0.00897101	0	0	0	0	0	0	0	0	0	0	0	0	0	0	0	0	0	0	0	0	0	0	0	0.0104822	0	0	0	0	0	0	0	0	0	0	0	0	0
chr1	81953025	81942969	+	ADGRL2	1	13	0	0	0	0	0	0	0	0	0	0	0	0	0	0	0	0	0	0	0	0	0	0	0.0103481	0	0	0	0	0	0	0.0104822	0	0	0	0	0	0	0	0	0	0	0	0.00800603	0
chr1	81956060	81936728	+	ADGRL2	1	1	0	0	0	0	0	0	0	0	0	0	0	0	0	0	0	0	0	0	0	0	0	0	0	0	0	0	0	0	0	0	0	0	0	0	0	0	0	0	0	0	0	0	0
chr1	81956060	81950189	+	ADGRL2	1	3	0	0	0	0	0	0	0	0	0	0	0	0	0	0	0	0	0	0	0	0	0.0105441	0	0	0	0	0	0	0	0	0	0	0	0	0	0	0	0	0	0	0.005728	0	0	0
chr1	81966609	81950189	+	ADGRL2	1	1	0	0	0	0	0	0	0	0	0	0	0	0	0	0.0145222	0	0	0	0	0	0	0	0	0	0	0	0	0	0	0	0	0	0	0	0	0	0	0	0	0	0	0	0	0
chr1	81971918	81968026	+	ADGRL2	1	1	0	0	0	0	0	0	0	0	0	0	0	0	0	0	0	0	0	0.00937882	0	0	0	0	0	0	0	0	0	0	0	0	0	0	0	0	0	0	0	0	0	0	0	0	0
chr1	81985355	81966058	+	ADGRL2	1	1	0	0	0	0	0	0	0	0	0	0	0	0	0	0	0	0	0	0	0	0	0	0	0	0	0	0	0	0	0	0	0	0	0	0	0	0	0.0196896	0	0	0	0	0	0
chr18	199316	192842	+	USP14	1	2	0	0	0	0	0	0	0	0	0	0	0	0	0	0	0	0	0	0	0	0	0	0	0	0	0	0	0	0	0	0	0	0	0	0	0	0	0	0	0	0	0	0	0
chr18	199316	196637	+	USP14	1	23	0	0	0	0	0	0	0	0	0.0215419	0	0	0	0.0390993	0	0	0	0	0	0.0415416	0	0	0	0.0206962	0	0	0	0.0169561	0	0.0152018	0	0	0.0127873	0	0.0197506	0	0	0.0196896	0	0	0.005728	0	0	0
chr18	203190	196637	+	USP14	1	18	0	0	0	0	0	0	0	0	0	0	0	0	0	0	0	0	0	0.00937882	0	0	0.0105441	0	0.0103481	0	0	0	0	0	0	0	0	0	0	0	0	0.0174408	0	0	0	0	0.0191802	0	0
chr18	204692	196637	+	USP14	1	38	0	0.018373	0.0155723	0	0	0	0	0	0	0	0	0.0274061	0	0	0.0143092	0	0	0	0.0207708	0	0.0421765	0	0.0206962	0.01967	0	0	0.00847806	0	0	0	0	0.0127873	0	0	0.0282301	0.0174408	0	0.00773231	0	0.005728	0	0.0160121	0.015239
chr10	77011967	77039637	-	KCNMA1	1	2	0	0.018373	0	0	0	0	0	0	0	0	0	0	0	0	0	0	0	0	0	0	0	0	0	0	0	0	0	0	0	0	0	0	0	0	0	0	0	0	0	0	0	0	0
chr18	20966917	20970513	-	ROCK1	1	1	0	0	0	0	0	0	0	0	0	0	0	0	0	0	0	0	0	0	0	0	0	0	0	0	0	0	0	0	0	0	0	0	0	0	0	0	0	0	0	0	0	0	0
chr18	20966917	20982832	-	ROCK1	1	1	0	0	0	0	0	0	0	0	0	0	0	0	0	0	0	0	0	0	0	0	0	0	0	0	0	0	0	0	0	0	0	0.0127873	0	0	0	0	0	0	0	0	0	0	0
chr18	20966917	20992937	-	ROCK1	1	4	0	0	0	0	0	0	0	0	0	0	0	0	0	0	0	0	0	0	0	0	0	0	0	0	0	0	0	0	0	0	0	0	0	0	0	0	0	0	0	0	0	0	0
chr18	20966917	21044186	-	ROCK1	1	2	0	0	0	0	0	0	0	0	0	0	0	0	0	0	0	0	0	0	0	0	0	0	0	0	0	0	0	0	0	0	0	0.0127873	0	0	0	0	0	0	0	0	0	0	0
chr18	20968772	20992937	-	ROCK1	1	1	0	0	0	0	0	0	0	0	0	0	0	0	0	0	0	0	0	0	0	0	0	0	0	0	0	0	0	0	0	0	0	0	0	0	0	0	0	0	0	0	0	0.00800603	0
chr18	20979910	20984535	-	ROCK1	1	3	0	0	0	0	0	0	0.0104492	0	0	0	0	0	0	0	0	0	0	0	0	0	0	0	0	0	0	0	0.00847806	0	0	0	0	0	0	0	0	0	0	0	0	0.011456	0	0	0
chr18	20979910	20987110	-	ROCK1	1	1	0	0	0	0	0	0	0	0	0	0	0	0	0	0	0	0	0	0	0	0	0	0	0.0103481	0	0	0	0	0	0	0	0	0	0	0	0	0	0	0	0	0	0	0	0
chr18	20979910	20991326	-	ROCK1	1	2	0	0	0	0	0	0	0	0	0	0	0	0	0	0	0	0	0	0	0	0	0	0	0	0	0	0	0.00847806	0	0	0	0	0	0	0	0	0	0	0	0	0	0	0	0
chr18	20979910	20992937	-	ROCK1	1	13	0	0	0.0155723	0	0	0.017942	0	0	0	0	0	0	0	0	0	0	0	0	0	0	0.0105441	0	0	0	0	0	0	0	0	0	0	0.0127873	0	0	0	0	0	0.00773231	0	0	0	0	0
chr18	20979910	21008194	-	ROCK1	1	6	0	0	0	0	0	0	0	0	0	0	0	0	0	0	0	0	0	0	0	0	0.0105441	0	0	0	0	0	0	0	0	0	0	0	0	0	0	0	0	0	0	0.005728	0	0	0
chr10	77011967	77079550	-	KCNMA1	1	5	0	0	0	0	0	0	0	0	0	0	0	0	0	0	0	0	0	0	0	0	0	0	0	0.01967	0	0	0	0	0	0	0	0	0	0	0	0	0	0	0	0	0	0	0
chr18	20982763	20992937	-	ROCK1	1	3	0	0	0	0	0	0	0	0	0	0	0	0	0	0	0	0	0	0	0	0	0	0	0	0	0	0	0	0.0148968	0	0	0	0	0	0	0	0	0	0	0	0.005728	0	0.00800603	0
chr18	20986950	20992937	-	ROCK1	1	1	0	0	0	0	0	0	0	0	0	0	0	0	0	0	0	0	0	0	0	0	0	0	0	0	0	0	0	0	0	0	0	0	0	0	0	0	0	0	0	0	0	0	0
chr18	20991176	20992937	-	ROCK1	1	2	0	0	0	0	0	0	0	0	0	0	0	0	0	0	0	0	0	0	0	0	0	0	0	0	0	0	0	0	0	0	0	0	0	0	0	0	0	0	0	0	0	0.00800603	0
chr18	20991176	21008194	-	ROCK1	1	1	0	0	0	0	0	0	0	0	0	0	0	0	0	0	0	0	0	0	0	0	0	0	0	0	0	0	0	0	0	0	0	0	0	0	0	0.0174408	0	0	0	0	0	0	0
chr18	20991176	21020239	-	ROCK1	1	111	0	0.0367461	0.0311446	0.0244509	0.0502943	0.026913	0.0417969	0.0678132	0.0215419	0	0.0901913	0.0274061	0.0195497	0.0435666	0	0.013398	0.0209997	0.0468941	0.0415416	0.0532064	0.105441	0	0.0517405	0.0983502	0.0287802	0.0640871	0.0423903	0.0148968	0	0.0314465	0.0409908	0.0639363	0.0300755	0.0395013	0.14115	0	0.0393792	0.0231969	0.0131307	0.022912	0.0191802	0.0480362	0.030478
chr18	20991176	21028935	-	ROCK1	1	1	0	0	0	0	0	0	0	0	0	0	0	0	0	0	0	0	0	0	0	0	0	0	0	0	0	0	0.00847806	0	0	0	0	0	0	0	0	0	0	0	0	0	0	0	0
chr18	20992831	21008194	-	ROCK1	1	4	0	0	0.0155723	0	0	0	0	0	0	0	0	0	0	0	0	0	0	0	0	0	0	0	0	0	0	0	0	0	0	0	0	0	0	0.0197506	0	0	0	0	0	0	0	0	0
chr18	20992831	21044186	-	ROCK1	1	1	0	0	0	0	0	0	0	0	0	0	0	0	0	0	0	0	0	0	0	0	0	0	0	0	0	0	0	0	0	0	0	0	0	0	0	0	0	0	0	0	0	0	0
chr18	21006351	21008194	-	ROCK1	1	27	0	0	0	0	0	0.00897101	0	0	0	0	0	0	0.0195497	0.0290444	0	0	0	0.00937882	0.0207708	0	0.0105441	0	0	0.01967	0	0.0256349	0	0.0148968	0	0	0	0	0	0	0	0	0.0393792	0.00773231	0	0	0	0	0
chr18	21015431	21044186	-	ROCK1	1	1	0	0	0	0	0	0	0	0	0	0	0	0	0	0	0	0	0	0.00937882	0	0	0	0	0	0	0	0	0	0	0	0	0	0	0	0	0	0	0	0	0	0	0	0	0
chr10	77027823	77112442	-	KCNMA1	1	1	0	0	0.0155723	0	0	0	0	0	0	0	0	0	0	0	0	0	0	0	0	0	0	0	0	0	0	0	0	0	0	0	0	0	0	0	0	0	0	0	0	0	0	0	0
chr18	21020151	21042709	-	ROCK1	1	1	0.0132985	0	0	0	0	0	0	0	0	0	0	0	0	0	0	0	0	0	0	0	0	0	0	0	0	0	0	0	0	0	0	0	0	0	0	0	0	0	0	0	0	0	0
chr18	21020151	21044186	-	ROCK1	1	9	0	0	0	0	0	0	0	0	0	0	0	0.013703	0	0.0145222	0	0	0	0	0	0	0	0	0	0.01967	0	0.0256349	0	0	0	0	0	0	0	0	0	0	0	0	0	0	0	0	0
chr18	21023620	21042709	-	ROCK1	1	4	0	0	0	0	0	0	0	0	0	0	0	0	0	0	0	0	0	0.00937882	0	0	0	0	0	0	0	0	0	0	0	0	0	0	0	0	0	0	0	0	0	0	0	0.00800603	0
chr18	21023620	21044186	-	ROCK1	1	1	0	0	0	0	0	0	0	0	0	0	0	0	0	0	0	0	0	0	0	0	0	0.0177926	0	0	0	0	0	0	0	0	0	0	0	0	0	0	0	0	0	0	0	0	0
chr18	21039472	21044186	-	ROCK1	1	7	0	0	0	0	0	0	0	0	0	0.0162073	0	0	0	0	0	0	0.0104998	0	0	0	0	0	0	0	0	0	0.00847806	0	0	0	0	0.0127873	0	0	0	0	0	0	0	0	0	0	0
chr18	21039472	21070613	-	ROCK1	1	1	0	0	0	0	0	0	0	0	0	0	0	0	0	0	0	0	0	0	0	0	0	0	0	0	0	0	0.00847806	0	0	0	0	0	0	0	0	0	0	0	0	0	0	0	0
chr18	21045292	21049880	-	ROCK1	1	1	0	0	0	0	0	0	0	0	0	0	0	0	0	0	0	0	0	0	0	0	0.0105441	0	0	0	0	0	0	0	0	0	0	0	0	0	0	0	0	0	0	0	0	0	0
chr18	21384403	21366027	+	GREB1L	1	2	0	0	0	0	0	0	0	0	0	0	0	0	0	0	0	0	0	0	0	0	0	0	0	0	0	0	0	0	0	0	0	0	0	0	0	0	0	0.00773231	0	0	0	0.00800603	0
chr18	21395561	21366027	+	GREB1L	1	2	0	0	0	0	0	0	0	0	0	0	0	0	0	0	0	0	0	0	0	0	0	0	0	0	0	0	0	0	0	0	0	0	0	0	0	0	0	0	0	0	0	0	0
chr18	21403994	21366027	+	GREB1L	1	57	0	0	0.0467169	0	0	0.00897101	0.0104492	0	0.0646258	0	0	0.013703	0	0.0145222	0	0.040194	0	0	0	0.0354709	0.0105441	0	0.0310443	0	0.0287802	0	0.00847806	0.0148968	0.0152018	0.0209643	0	0.0127873	0	0	0	0.0174408	0	0	0.0262614	0.02864	0	0.00800603	0
chr10	77039528	77079550	-	KCNMA1	1	24	0	0	0	0	0	0	0.0104492	0	0	0	0.0225478	0	0	0	0	0	0	0	0	0	0	0	0.0103481	0	0	0.0384523	0.00847806	0	0.0152018	0	0	0.0127873	0	0	0	0	0	0.00773231	0.0131307	0.005728	0	0	0
chr18	21532473	21566206	-	ESCO1	1	2	0	0	0	0	0	0	0	0	0	0	0	0	0	0	0	0	0	0	0	0	0	0	0.0103481	0	0	0	0	0	0	0	0	0	0	0	0	0	0	0	0	0	0	0	0
chr18	21532473	21568094	-	ESCO1	1	1	0	0	0	0	0	0	0	0	0.0215419	0	0	0	0	0	0	0	0	0	0	0	0	0	0	0	0	0	0	0	0	0	0	0	0	0	0	0	0	0	0	0	0	0	0
chr18	21536042	21566206	-	ESCO1	1	4	0	0	0	0	0	0	0	0	0	0	0	0	0	0	0	0	0	0	0	0	0	0	0	0.01967	0	0	0	0	0	0	0	0	0	0	0	0	0	0	0	0	0	0	0
chr18	21536042	21568094	-	ESCO1	1	62	0	0	0.0155723	0.0244509	0	0.00897101	0	0	0.0430839	0	0	0.013703	0	0.0145222	0	0.013398	0	0.0187576	0	0	0.0105441	0	0	0.0393401	0	0.0128174	0	0.0297937	0.0152018	0.0209643	0.0204954	0	0.0300755	0.0197506	0	0	0.0196896	0.0231969	0.0262614	0.005728	0	0.0320241	0
chr18	21536042	21584440	-	ESCO1	1	1	0	0	0	0	0	0	0	0	0	0	0	0	0	0	0	0	0	0	0	0	0	0	0	0	0	0	0	0	0	0	0	0	0	0	0	0	0	0	0	0	0	0	0
chr18	21539920	21566206	-	ESCO1	1	2	0	0	0	0	0	0	0	0	0	0	0	0	0	0	0	0	0	0	0	0	0	0	0	0	0	0	0	0	0	0	0	0	0	0	0	0	0	0	0	0	0	0	0
chr18	21539920	21568094	-	ESCO1	1	1	0	0.018373	0	0	0	0	0	0	0	0	0	0	0	0	0	0	0	0	0	0	0	0	0	0	0	0	0	0	0	0	0	0	0	0	0	0	0	0	0	0	0	0	0
chr18	21560859	21566206	-	ESCO1	1	3	0	0	0	0	0	0	0	0	0	0	0	0	0	0	0	0	0	0	0	0	0	0	0	0	0	0	0	0	0	0	0	0	0	0	0	0	0	0	0	0	0	0	0
chr18	21560859	21568094	-	ESCO1	1	13	0	0	0	0	0	0	0	0	0	0	0.0225478	0	0	0	0	0	0	0	0	0	0	0	0.0103481	0	0	0	0	0	0	0	0	0	0	0	0	0	0	0	0	0	0	0	0
chr18	21560859	21575777	-	ESCO1	1	6	0	0	0	0	0	0.00897101	0	0	0	0	0	0	0	0	0	0	0	0	0	0	0	0	0	0	0	0.0128174	0	0	0	0	0	0	0	0	0	0	0	0.00773231	0	0	0	0	0
chr10	77039528	77086593	-	KCNMA1	1	1	0	0	0	0	0	0	0	0	0	0	0	0	0	0	0	0	0	0.00937882	0	0	0	0	0	0	0	0	0	0	0	0	0	0	0	0	0	0	0	0	0	0	0	0	0
chr18	21560859	21584440	-	ESCO1	1	16	0	0	0	0	0.0251472	0	0	0.0113022	0	0	0	0	0	0	0	0	0	0	0	0	0	0	0.0103481	0	0	0	0	0	0	0	0	0	0	0	0.0564602	0	0	0	0	0.005728	0	0.00800603	0
chr18	21564203	21568094	-	ESCO1	1	56	0.0265971	0	0.0155723	0	0	0.00897101	0.0104492	0	0	0.0324146	0	0	0	0.0871333	0	0	0.0104998	0.00937882	0.0207708	0	0.0210882	0.0177926	0	0.0786801	0	0	0.0254342	0.0297937	0.0304037	0	0.0102477	0.0255745	0	0	0	0	0	0.00773231	0	0.017184	0.0383604	0.00800603	0
chr18	21564203	21584440	-	ESCO1	1	7	0	0	0	0	0	0.00897101	0	0	0	0	0	0	0	0	0	0	0	0	0	0	0.0105441	0	0	0	0	0.0128174	0	0	0	0	0	0	0	0	0	0	0	0	0	0	0	0	0
chr18	21566146	21568094	-	ESCO1	1	3	0	0	0	0	0	0	0	0	0	0	0	0	0	0	0	0	0	0	0	0	0.0105441	0	0	0	0	0	0	0	0	0	0	0	0	0	0	0	0	0	0	0	0	0	0.030478
chr18	21656861	21659343	-	ABHD3	1	3	0	0	0	0	0	0	0	0	0	0	0	0	0	0	0	0	0	0	0	0	0	0	0	0	0	0	0	0	0	0	0	0	0	0	0	0	0	0	0	0	0	0	0
chr18	21656861	21664230	-	ABHD3	1	2	0	0	0	0	0	0	0	0	0	0	0	0	0	0.0145222	0	0	0	0	0	0	0	0	0	0	0	0	0	0	0	0	0	0	0	0	0	0	0	0	0	0	0	0	0
chr18	21656861	21683965	-	ABHD3	1	1	0	0	0	0	0	0	0	0	0	0	0	0	0	0	0	0	0	0	0	0	0	0	0	0	0	0.0128174	0	0	0	0	0	0	0	0	0	0	0	0	0	0	0	0	0
chr18	21768752	21765772	+	MIB1	1	2	0	0	0	0	0	0	0	0	0	0	0	0	0	0	0	0	0	0	0.0415416	0	0	0	0	0	0	0	0	0	0	0	0	0	0	0	0	0	0	0	0.0131307	0	0	0	0
chr18	21773728	21765772	+	MIB1	1	2	0	0	0	0	0	0	0	0	0.0215419	0	0	0	0	0	0	0	0	0	0	0	0	0	0	0	0	0	0	0	0	0	0	0	0	0	0	0	0	0	0	0	0	0	0
chr18	21779685	21765772	+	MIB1	1	133	0.0930898	0.146984	0.0934339	0.122254	0.17603	0.125594	0.125391	0.271253	0.129252	0.0324146	0.135287	0.164437	0.195497	0.290444	0.0429277	0.13398	0.167997	0.0937882	0.207708	0.159619	0.390133	0	0.196614	0.0983502	0.143901	0.269166	0.161083	0.238349	0.304037	0.136268	0.256193	0.166234	0.120302	0.118504	0.282301	0.139527	0.315034	0.0850554	0.0919149	0.223392	0.153442	0.216163	0.243824
chr10	77039528	77090510	-	KCNMA1	1	3	0	0	0	0	0	0	0	0	0	0	0	0	0	0	0	0.013398	0	0	0	0	0	0	0	0	0	0	0	0	0	0	0	0	0	0	0	0	0	0	0	0	0	0	0.015239
chr18	21779685	21773624	+	MIB1	1	42	0	0.0551191	0.0155723	0	0	0	0.0104492	0	0	0	0	0.013703	0.0195497	0.0290444	0	0	0.0104998	0	0.0415416	0	0.0316324	0	0.0206962	0	0	0	0.00847806	0.0148968	0.0152018	0	0	0	0.0300755	0.0197506	0	0	0	0	0.0131307	0.011456	0	0.0160121	0.030478
chr18	21779685	21778103	+	MIB1	1	21	0	0	0	0	0	0.00897101	0	0	0	0	0	0	0	0	0.0143092	0.013398	0	0.00937882	0	0	0.0210882	0	0	0	0.0143901	0	0	0	0	0.0104822	0	0	0	0	0	0	0	0	0	0.005728	0	0	0
chr18	21791557	21765772	+	MIB1	1	17	0	0	0	0	0	0	0.0417969	0	0	0	0	0.013703	0	0	0	0	0	0.00937882	0	0	0	0	0	0	0	0	0	0	0	0.0314465	0	0	0	0	0	0.0174408	0	0	0	0.011456	0	0	0
chr18	21798228	21765772	+	MIB1	1	8	0	0	0	0.0244509	0	0	0	0	0	0	0	0	0	0	0	0	0	0	0	0	0	0	0	0	0	0	0	0.0148968	0	0	0	0	0	0	0	0	0	0	0	0	0	0	0
chr18	21799974	21765772	+	MIB1	1	31	0	0	0	0	0.0251472	0	0.0104492	0.0226044	0.0430839	0.0162073	0	0	0	0.0435666	0	0	0	0	0	0	0.0105441	0	0	0.0786801	0.0143901	0	0	0	0	0	0	0	0	0	0	0	0	0	0	0.022912	0	0	0
chr18	21804014	21765772	+	MIB1	1	46	0.0132985	0	0.0155723	0	0	0	0	0	0	0	0	0.013703	0	0.0145222	0	0	0	0.00937882	0.0207708	0	0.0105441	0	0	0	0	0.0128174	0.00847806	0	0	0	0	0.0127873	0.0601511	0.0197506	0	0	0.0196896	0	0	0	0.0191802	0.00800603	0
chr18	21804014	21791374	+	MIB1	1	12	0	0	0	0	0	0	0	0.0113022	0	0	0	0	0	0	0	0	0	0	0	0	0	0	0	0	0	0	0	0	0	0	0	0	0	0.0197506	0	0	0	0	0	0	0	0	0
chr18	21819646	21765772	+	MIB1	1	98	0	0.018373	0.0155723	0	0	0.026913	0.0313477	0.0339066	0	0	0	0.013703	0	0.101655	0.0143092	0.026796	0.0104998	0.0187576	0.0207708	0	0.0527206	0	0.0724367	0.01967	0	0.153809	0.0254342	0.0595873	0.091211	0.0104822	0.0307431	0.0127873	0	0.0197506	0.0282301	0.0697634	0.098448	0.0309292	0.0262614	0.040096	0	0.00800603	0.015239
chr18	21819646	21791374	+	MIB1	1	1	0	0	0	0	0	0	0	0	0	0	0	0	0	0	0	0	0.0104998	0	0	0	0	0	0	0	0	0	0	0	0	0	0	0	0	0	0	0	0	0	0	0	0	0	0
chr18	21847125	21791374	+	MIB1	1	1	0	0	0	0	0	0	0	0	0	0	0	0	0	0	0	0	0	0	0	0	0	0	0	0	0	0.0128174	0	0	0	0	0	0	0	0	0	0	0	0	0	0	0	0	0
chr10	106699214	106709341	-	SORCS1	1	62	0	0.018373	0.0155723	0	0	0.00897101	0	0	0.0430839	0	0.0450957	0.0548122	0.0195497	0.0290444	0	0	0.0104998	0.00937882	0	0	0.0316324	0	0.0206962	0	0	0.0512697	0.0169561	0.0148968	0.0152018	0.0314465	0	0.0255745	0	0	0.0282301	0.0174408	0	0.0386616	0.0262614	0.02864	0	0.0400301	0
chr10	77039528	77112442	-	KCNMA1	1	1	0	0	0	0	0	0	0	0	0	0	0	0	0	0	0	0	0	0	0	0	0	0	0	0	0	0	0	0	0	0	0	0	0	0	0	0	0	0	0	0	0	0	0
chr18	21847125	21838365	+	MIB1	1	2	0	0	0	0	0	0	0	0	0	0	0	0	0	0	0	0	0	0	0	0	0	0	0	0	0	0	0	0	0	0	0	0	0	0	0	0	0	0	0	0	0	0	0
chr18	21849388	21765772	+	MIB1	1	3	0	0	0	0	0	0	0	0	0	0	0	0	0	0	0.0143092	0	0	0	0	0	0	0	0	0	0	0	0	0	0	0	0	0	0	0	0	0	0	0	0	0	0	0	0
chr18	21858646	21838365	+	MIB1	1	1	0	0	0	0	0	0	0	0	0	0	0	0	0	0	0	0	0	0	0	0	0.0105441	0	0	0	0	0	0	0	0	0	0	0	0	0	0	0	0	0	0	0	0	0	0
chr18	21858646	21849196	+	MIB1	1	4	0	0	0	0	0	0	0	0	0	0	0	0	0	0	0	0	0	0	0	0	0	0	0	0	0	0	0	0	0	0	0	0	0	0	0	0.0174408	0	0	0.0131307	0	0	0	0
chr18	223440	226901	-	THOC1	1	1	0	0	0	0	0	0	0	0	0	0	0	0	0	0	0	0	0	0	0	0	0	0	0.0103481	0	0	0	0	0	0	0	0	0	0	0	0	0	0	0	0	0	0	0	0
chr18	224924	226901	-	THOC1	1	1	0	0	0	0	0	0	0	0	0	0	0	0	0.0195497	0	0	0	0	0	0	0	0	0	0	0	0	0	0	0	0	0	0	0	0	0	0	0	0	0	0	0	0	0	0
chr18	22949713	22936754	+	RBBP8	1	2	0	0	0	0	0	0	0	0	0	0	0	0	0	0	0	0	0	0	0	0	0.0105441	0	0	0	0	0	0	0	0	0	0	0	0	0	0	0	0	0	0	0	0	0	0
chr18	22984990	22968806	+	RBBP8	1	1	0	0	0	0	0	0	0	0	0	0	0	0	0	0	0	0	0	0	0	0	0	0	0	0	0	0	0	0	0	0	0	0	0	0	0	0	0	0	0	0	0	0	0
chr18	22984990	22975153	+	RBBP8	1	20	0	0	0	0	0	0.00897101	0	0	0	0	0	0	0	0	0	0	0	0	0.0415416	0	0	0	0	0	0	0.0128174	0.00847806	0	0	0	0.0204954	0	0	0	0	0	0	0.00773231	0	0.017184	0	0.0160121	0
chr18	22996462	22984886	+	RBBP8	1	2	0	0	0	0	0	0	0	0.0113022	0	0	0	0	0	0	0	0	0	0	0	0	0	0	0	0	0	0	0	0	0	0	0	0	0	0	0	0	0	0	0	0	0	0	0
chr10	77073097	77079550	-	KCNMA1	1	15	0	0	0	0	0	0	0	0.0113022	0	0	0	0	0	0	0	0	0	0	0	0	0.0105441	0	0	0	0.0143901	0.0128174	0	0	0	0	0	0	0	0	0.0282301	0.0174408	0	0	0	0	0	0	0.015239
chr18	22996462	22990937	+	RBBP8	1	6	0	0	0	0	0	0	0	0	0	0	0	0	0	0	0	0	0	0	0	0	0.0105441	0	0	0	0	0	0.00847806	0	0	0	0	0	0	0	0	0	0	0.00773231	0	0	0	0	0
chr18	22996462	22992748	+	RBBP8	1	1	0	0	0	0	0	0	0	0	0	0	0	0	0	0	0	0	0	0	0	0	0.0105441	0	0	0	0	0	0	0	0	0	0	0	0	0	0	0	0	0	0	0	0	0	0
chr18	23001729	22975153	+	RBBP8	1	52	0	0.018373	0	0	0	0.026913	0.0208984	0	0	0	0.0225478	0.0411091	0	0	0	0.013398	0	0	0	0	0.0210882	0	0	0.01967	0	0.0128174	0.0254342	0	0.0456055	0	0	0	0	0	0	0.0348817	0.0196896	0.0309292	0	0.017184	0.0383604	0.0400301	0.015239
chr18	23001729	22982218	+	RBBP8	1	13	0	0	0.0155723	0	0	0	0	0	0	0	0	0	0	0	0	0	0	0.00937882	0.0207708	0	0	0	0	0	0	0.0256349	0	0	0	0	0	0	0	0	0	0	0	0	0.0131307	0	0	0	0
chr18	23001729	22989221	+	RBBP8	1	32	0	0	0	0	0.0251472	0	0.0104492	0	0	0	0	0.013703	0	0.0145222	0	0	0.0104998	0	0	0	0.0105441	0	0	0.01967	0	0.0128174	0	0.0297937	0	0	0	0.0127873	0	0	0	0.0174408	0.0196896	0	0	0	0	0	0
chr18	23001729	22990937	+	RBBP8	1	5	0	0	0	0	0	0	0	0	0	0	0	0	0	0	0	0	0	0	0	0	0	0	0	0	0	0	0	0	0	0	0	0	0	0	0	0	0	0	0	0	0	0	0
chr18	23001729	22992748	+	RBBP8	1	1	0	0	0	0	0	0	0	0	0	0	0	0	0	0	0	0	0	0	0	0	0.0105441	0	0	0	0	0	0	0	0	0	0	0	0	0	0	0	0	0	0	0	0	0	0
chr18	23022270	23001586	+	RBBP8	1	1	0	0	0	0	0	0	0	0	0	0	0	0	0	0	0	0	0	0	0	0	0	0	0	0	0	0	0	0	0	0	0	0	0	0	0	0	0	0	0	0.005728	0	0	0
chr18	23237245	23213977	+	CABLES1	1	5	0	0	0	0	0	0	0	0	0	0	0	0	0	0	0	0	0.0104998	0	0	0	0	0	0	0	0	0	0	0	0	0	0	0	0	0	0	0	0	0	0	0	0	0	0
chr18	23237245	23234608	+	CABLES1	1	36	0.0132985	0	0.0155723	0	0	0.017942	0.0104492	0	0.0215419	0	0	0	0	0	0	0	0	0	0	0	0.0210882	0	0	0	0.0143901	0	0	0	0	0	0	0.0127873	0	0	0	0	0	0	0	0	0	0.00800603	0
chr10	77073097	77090510	-	KCNMA1	1	2	0	0	0	0	0	0	0	0	0	0	0	0	0	0	0	0	0	0	0	0	0	0	0	0	0	0	0	0	0	0	0	0	0	0	0	0	0	0	0	0	0	0	0
chr18	23253936	23234608	+	CABLES1	1	1	0	0	0	0	0	0	0	0	0	0	0	0	0	0	0	0	0	0	0	0	0	0	0	0	0	0	0.00847806	0	0	0	0	0	0	0	0	0	0	0	0	0	0	0	0
chr18	23309680	23352289	-	TMEM241	1	1	0	0	0	0	0	0	0	0	0	0	0	0	0	0	0	0	0	0	0	0	0	0	0	0	0	0	0	0	0	0	0	0	0	0	0	0	0	0	0	0	0	0	0
chr18	23309680	23373763	-	TMEM241	1	44	0	0	0.0467169	0	0.0251472	0	0	0	0	0	0	0.013703	0	0	0	0	0	0.0281364	0	0.0177355	0.0421765	0	0.0103481	0	0.0143901	0.0384523	0.00847806	0	0	0.0104822	0.0102477	0	0	0	0.0282301	0	0	0	0	0	0	0.0160121	0
chr18	23352196	23373763	-	TMEM241	1	9	0	0	0	0	0	0	0	0	0	0	0	0	0	0	0	0	0.0104998	0	0	0	0	0	0	0	0	0	0	0	0	0	0	0	0	0	0	0	0	0	0	0	0	0	0
chr18	23352196	23385067	-	TMEM241	1	1	0	0	0	0	0	0	0	0	0	0	0	0	0	0	0	0	0	0	0	0	0	0	0	0	0	0	0	0	0	0	0	0	0	0	0	0	0	0	0	0	0	0	0
chr18	23352196	23399647	-	TMEM241	1	2	0	0	0	0	0	0	0.0104492	0	0	0	0	0	0	0	0	0	0	0	0	0	0	0	0	0	0	0	0	0	0	0	0	0	0	0	0	0.0174408	0	0	0	0	0	0	0
chr18	23352196	23421444	-	TMEM241	1	1	0	0	0	0	0	0	0	0	0	0	0	0	0	0	0	0	0	0	0	0	0	0	0	0	0	0	0	0	0	0	0	0.0127873	0	0	0	0	0	0	0	0	0	0	0
chr18	23466276	23462964	+	RIOK3	1	1	0	0	0	0	0	0	0	0	0	0.0162073	0	0	0	0	0	0	0	0	0	0	0	0	0	0	0	0	0	0	0	0	0	0	0	0	0	0	0	0	0	0	0	0	0
chr18	23509279	23507985	+	C18orf8	1	4	0	0	0	0	0	0	0	0	0	0	0	0	0	0	0.0143092	0	0	0	0.0207708	0	0.0105441	0	0	0	0	0	0	0	0	0	0	0	0	0	0	0	0	0	0	0	0	0	0
chr18	23519174	23507985	+	C18orf8	1	3	0	0	0	0	0	0	0.0104492	0	0	0	0	0	0	0	0	0	0	0	0	0	0	0	0	0	0	0	0	0	0	0	0	0	0	0	0	0	0	0	0	0	0	0	0
chr10	77073097	77112442	-	KCNMA1	1	3	0	0	0	0	0	0	0	0	0	0	0	0	0	0	0	0	0	0	0	0	0.0210882	0	0	0	0	0	0	0	0	0	0	0	0	0	0	0	0	0	0	0.005728	0	0	0
chr18	23519174	23515856	+	C18orf8	1	8	0	0	0	0	0	0	0	0	0	0	0	0	0	0	0	0	0	0	0	0	0	0	0	0	0	0	0	0	0	0	0	0	0	0	0	0	0	0	0	0	0	0	0
chr18	23520313	23515856	+	C18orf8	0		0	0	0	0	0	0	0	0	0	0	0	0	0	0	0	0	0	0	0	0	0	0	0	0	0	0	0	0	0	0	0	0	0	0	0	0	0	0	0	0	0	0	0
chr18	23526765	23507985	+	C18orf8	1	1	0	0	0	0	0	0	0	0	0	0	0	0	0	0	0	0	0	0	0	0	0	0	0	0	0	0	0	0	0	0	0	0	0	0	0	0	0	0	0	0	0	0.00800603	0
chr18	23526765	23515856	+	C18orf8	1	2	0	0	0	0	0	0	0	0	0	0	0	0	0	0	0	0	0	0	0	0	0	0	0	0	0	0	0	0	0	0	0	0	0	0	0	0.0174408	0	0	0	0	0	0	0
chr18	23864883	23842395	+	LAMA3	1	1	0	0	0	0	0	0	0	0.0113022	0	0	0	0	0	0	0	0	0	0	0	0	0	0	0	0	0	0	0	0	0	0	0	0	0	0	0	0	0	0	0	0	0	0	0
chr18	24069271	24064140	+	TTC39C	1	23	0	0	0	0	0	0	0	0.0113022	0	0	0	0	0.0195497	0	0	0	0.0629991	0.00937882	0	0	0	0	0.0206962	0.01967	0	0	0	0	0	0.0314465	0	0.0127873	0	0	0	0	0	0	0	0.005728	0	0	0
chr18	24083081	24064140	+	TTC39C	1	116	0	0.0734921	0.0778615	0	0.0502943	0.0448551	0.0731446	0.0791155	0.10771	0.0162073	0.157835	0.0822183	0.0195497	0.174267	0.0429277	0.040194	0.0839987	0.0187576	0.0623124	0.0532064	0.137074	0.0355851	0.0724367	0	0.0143901	0.0640871	0.0508683	0.0744842	0	0.0524108	0.0204954	0.0639363	0.0601511	0.0197506	0	0.0697634	0.0787584	0.0309292	0.0393921	0.040096	0.0383604	0.0800603	0
chr18	24118232	24064140	+	TTC39C	1	2	0	0	0	0	0	0	0	0	0	0	0	0	0	0	0	0	0	0	0	0	0	0	0	0	0	0	0	0	0	0	0	0	0	0	0	0	0	0	0	0	0	0	0
chr18	24125550	24118125	+	TTC39C	1	3	0	0	0	0	0	0	0	0	0	0	0	0	0	0	0	0	0	0	0	0	0.0105441	0	0	0	0	0	0	0	0	0	0	0	0	0	0	0	0	0	0	0	0	0.00800603	0
chr18	24125550	24123834	+	TTC39C	1	22	0	0	0	0	0	0	0.0417969	0	0	0	0	0	0	0.0290444	0	0	0	0	0	0.0177355	0.0316324	0	0	0	0	0	0.00847806	0.0744842	0	0	0	0	0	0	0	0	0	0	0.0262614	0	0	0	0
chr10	77073097	77184916	-	KCNMA1	1	2	0	0	0	0	0	0	0	0	0	0	0	0	0	0	0	0	0	0	0	0	0	0	0	0	0	0	0	0	0	0	0	0	0	0	0	0	0	0	0	0	0	0	0
chr18	24128983	24123834	+	TTC39C	1	1	0	0	0	0	0	0	0	0.0113022	0	0	0	0	0	0	0	0	0	0	0	0	0	0	0	0	0	0	0	0	0	0	0	0	0	0	0	0	0	0	0	0	0	0	0
chr18	24130417	24064140	+	TTC39C	1	3	0	0	0	0	0	0	0.0104492	0	0	0	0	0	0	0	0	0.013398	0	0	0	0	0	0	0	0	0	0	0	0	0	0	0	0	0	0	0	0	0	0	0	0	0	0	0
chr18	24130417	24082913	+	TTC39C	1	15	0	0	0	0	0	0.017942	0	0	0	0	0	0	0	0	0	0	0	0	0	0	0.0210882	0	0	0	0	0.0128174	0	0	0	0	0	0	0	0	0	0	0	0	0.0393921	0.017184	0	0	0
chr18	24143413	24143091	+	CABYR	1	79	0.0132985	0.0367461	0.0155723	0.0244509	0.0251472	0.026913	0.0208984	0.0339066	0.0430839	0	0.0676435	0	0.0195497	0.0580888	0	0.040194	0.0209997	0.0281364	0.0623124	0	0.0421765	0	0.0310443	0.0393401	0.0143901	0.0128174	0.0339122	0.0595873	0	0.0104822	0.0102477	0.051149	0.0902266	0	0.0282301	0.0523225	0.0196896	0.0231969	0.0656535	0.040096	0	0.0160121	0
chr18	24165065	24166702	-	OSBPL1A	1	1	0	0	0	0	0	0	0	0	0	0	0	0	0	0	0	0	0	0	0	0	0	0	0	0.0393401	0	0	0	0	0	0	0	0	0	0	0	0	0	0	0	0	0	0	0
chr18	24165065	24172483	-	OSBPL1A	1	14	0	0	0	0	0	0	0	0.0113022	0.0215419	0	0	0	0	0	0	0	0	0	0	0	0	0	0	0	0	0.0128174	0	0.0148968	0	0	0	0	0	0	0	0	0	0	0	0	0	0.0160121	0
chr18	24165065	24178195	-	OSBPL1A	1	1	0	0	0	0	0	0	0	0	0	0	0	0	0	0	0	0	0	0	0	0	0	0	0	0	0	0	0	0	0	0	0	0	0	0	0	0	0	0.00773231	0	0	0	0	0
chr18	24165065	24179835	-	OSBPL1A	1	1	0	0	0	0	0	0	0	0	0	0	0	0	0	0	0	0.013398	0	0	0	0	0	0	0	0	0	0	0	0	0	0	0	0	0	0	0	0	0	0	0	0	0	0	0
chr18	24165065	24239382	-	OSBPL1A	1	1	0	0	0	0	0	0	0	0	0	0	0	0	0	0	0	0	0	0	0	0	0	0	0	0	0	0	0	0	0	0	0	0	0	0	0	0	0	0	0	0	0	0	0
chr18	24171409	24181279	-	OSBPL1A	1	1	0	0	0	0	0	0	0	0	0	0	0	0	0	0	0	0	0	0.00937882	0	0	0	0	0	0	0	0	0	0	0	0	0	0	0	0	0	0	0	0	0	0	0	0	0
chr10	77108481	77184916	-	KCNMA1	1	1	0	0	0	0	0	0	0	0	0	0	0	0	0	0	0	0	0	0	0	0	0	0	0	0	0	0	0	0	0	0	0	0	0	0	0	0	0	0	0	0	0	0	0
chr18	24178013	24179835	-	OSBPL1A	1	45	0	0	0.0155723	0	0	0	0.0104492	0.0113022	0	0	0.0450957	0	0	0.0145222	0	0	0	0.00937882	0.0207708	0.0177355	0	0	0.0103481	0	0	0.0384523	0.0169561	0	0	0	0	0.0383618	0	0	0.0282301	0	0.0393792	0	0	0.017184	0	0.00800603	0
chr18	24178013	24181279	-	OSBPL1A	1	1	0	0	0	0	0	0	0	0	0	0	0	0	0	0	0	0	0	0	0	0	0	0	0	0	0	0	0	0	0	0	0	0	0	0	0	0	0	0	0	0	0	0	0
chr18	24178013	24239382	-	OSBPL1A	1	3	0	0	0	0	0	0	0	0	0	0	0	0	0	0	0	0	0	0	0	0	0	0	0	0	0	0	0	0	0	0	0.0102477	0	0	0	0	0	0	0	0	0	0	0	0
chr18	24196125	24239382	-	OSBPL1A	1	80	0	0	0.0155723	0	0	0.0358841	0	0.056511	0	0.0486218	0	0.0822183	0.156397	0	0	0.053592	0.0104998	0.00937882	0.145396	0.0532064	0	0.0177926	0	0.0393401	0.0863405	0	0.161083	0	0.0304037	0	0	0.0639363	0	0.0592519	0	0.0348817	0	0.0618585	0.0393921	0.045824	0	0.0560422	0.015239
chr18	24196125	24334330	-	OSBPL1A	1	1	0	0	0	0	0	0	0	0	0	0	0	0	0	0.0145222	0	0	0	0	0	0	0	0	0	0	0	0	0	0	0	0	0	0	0	0	0	0	0	0	0	0	0	0	0
chr18	24225042	24239382	-	OSBPL1A	1	72	0	0.0551191	0.0155723	0	0	0.017942	0	0	0	0	0.0225478	0.0685152	0.0781986	0.0290444	0.0286185	0	0.0209997	0.00937882	0	0	0.0632647	0	0	0	0.0143901	0.0256349	0.0254342	0.0148968	0.0456055	0.0209643	0.0102477	0.0383618	0	0.0395013	0.0564602	0	0.0393792	0.0154646	0	0.017184	0.0383604	0.00800603	0
chr18	24225042	24318809	-	OSBPL1A	1	1	0	0	0	0	0	0	0	0.0113022	0	0	0	0	0	0	0	0	0	0	0	0	0	0	0	0	0	0	0	0	0	0	0	0	0	0	0	0	0	0	0	0	0	0	0
chr18	24225042	24334330	-	OSBPL1A	1	6	0	0	0	0	0	0	0	0.0113022	0	0	0	0	0	0	0	0	0	0	0	0	0	0	0	0	0	0	0	0	0	0	0	0	0	0	0	0	0	0	0	0	0	0	0
chr18	24225042	24377535	-	OSBPL1A	1	3	0	0	0	0	0	0	0	0	0	0	0	0	0	0	0	0	0	0	0	0	0	0	0	0.01967	0	0	0	0	0	0	0	0	0	0	0	0	0	0	0	0	0	0	0
chr18	24280842	24318809	-	OSBPL1A	1	3	0	0	0	0	0	0	0	0	0	0	0	0	0	0	0	0	0	0	0	0	0.0105441	0	0	0	0	0	0	0	0	0	0	0	0	0	0	0	0	0	0	0	0	0	0
chr10	7759890	7769345	-	KIN	1	2	0	0	0	0	0	0	0	0	0	0	0	0	0	0	0	0	0	0	0	0	0.0105441	0	0	0	0	0	0	0	0	0	0	0	0	0	0	0	0	0	0	0	0	0	0
chr18	24280842	24334330	-	OSBPL1A	1	3	0	0	0	0	0	0	0	0	0	0	0	0	0	0	0	0	0	0	0	0	0	0	0	0	0	0	0	0	0	0	0	0	0	0	0	0	0	0	0	0	0	0	0
chr18	24280842	24341658	-	OSBPL1A	1	10	0	0	0	0	0	0	0.0104492	0.0113022	0	0.0162073	0	0	0	0.0145222	0	0	0	0	0	0	0.0105441	0	0	0	0	0.0128174	0	0	0	0	0	0	0	0	0	0	0	0	0	0	0	0	0
chr18	24280842	24377535	-	OSBPL1A	1	14	0	0	0.0155723	0	0	0	0	0	0	0	0	0	0	0	0	0	0	0	0	0	0	0	0.0103481	0	0	0	0	0	0	0	0	0	0	0	0	0	0	0	0	0.005728	0	0	0
chr18	24303637	24366966	-	OSBPL1A	1	1	0	0	0	0	0	0	0	0	0	0	0	0	0	0	0	0	0	0	0	0	0	0	0	0	0	0	0	0	0	0	0	0	0	0	0	0	0	0	0	0	0	0	0
chr18	24366892	24377535	-	OSBPL1A	1	9	0	0	0	0	0	0	0.0104492	0	0	0	0	0	0	0.0290444	0	0	0	0	0	0	0	0	0	0	0	0.0128174	0	0	0	0	0	0	0	0	0	0	0	0.00773231	0	0	0	0.00800603	0
chr18	25195160	25322187	-	ZNF521	1	2	0	0	0	0	0	0	0	0	0	0	0	0	0	0	0	0	0	0.00937882	0	0	0	0	0	0	0	0	0	0	0	0	0	0	0	0	0	0	0	0	0	0	0	0	0
chr18	25224345	25227697	-	ZNF521	1	8	0	0	0	0.0244509	0	0	0	0	0	0	0	0	0	0	0	0	0	0	0	0	0	0	0	0	0	0	0	0	0	0	0	0	0	0	0	0	0	0.00773231	0	0	0	0	0
chr18	25224345	25322187	-	ZNF521	1	1	0	0	0	0	0	0	0	0	0	0	0	0	0	0	0	0	0	0	0	0	0	0	0	0	0	0	0	0	0	0	0	0	0	0	0	0	0	0	0	0	0	0	0
chr18	25224345	25345347	-	ZNF521	1	1	0	0	0	0	0	0	0	0	0	0	0	0	0	0	0	0	0	0	0	0	0	0	0	0	0	0	0	0	0	0	0	0	0	0	0	0	0	0	0	0	0	0	0
chr18	25322008	25327448	-	ZNF521	1	13	0	0	0	0.0244509	0	0	0	0	0	0	0	0	0	0.0145222	0	0	0	0	0	0	0	0	0	0	0.0431703	0	0	0	0	0.0104822	0	0	0	0	0	0	0	0.00773231	0	0	0	0	0
chr10	7778838	7780307	-	KIN	1	3	0	0	0	0	0	0	0	0	0	0	0	0	0	0	0	0.013398	0	0	0	0	0	0	0	0	0	0	0	0	0	0	0	0	0	0	0	0	0	0	0	0	0	0	0
chr18	26032399	26057742	-	SS18	1	2	0	0	0	0	0	0	0	0	0	0	0	0	0	0	0	0	0	0	0	0	0	0	0	0	0	0	0	0	0	0.0209643	0	0	0	0	0	0	0	0	0	0	0	0	0
chr18	26032399	26068557	-	SS18	1	1	0	0	0	0	0	0	0	0	0	0	0	0	0	0	0	0	0	0	0	0	0	0	0	0	0	0	0	0	0	0	0	0.0127873	0	0	0	0	0	0	0	0	0	0	0
chr18	26032399	26078160	-	SS18	1	7	0	0	0.0155723	0	0	0	0	0	0	0	0	0	0	0	0.0143092	0	0	0	0	0	0	0	0	0	0	0	0	0.0148968	0	0	0	0	0	0	0	0	0	0	0	0	0	0	0
chr18	26032399	26084175	-	SS18	1	1	0	0	0	0	0	0	0	0	0	0	0	0	0	0.0145222	0	0	0	0	0	0	0	0	0	0	0	0	0	0	0	0	0	0	0	0	0	0	0	0	0	0	0	0	0
chr18	26038555	26078160	-	SS18	1	1	0	0	0	0	0	0	0	0	0	0	0	0	0	0	0	0	0.0104998	0	0	0	0	0	0	0	0	0	0	0	0	0	0	0	0	0	0	0	0	0	0	0	0	0	0
chr18	26038555	26087577	-	SS18	1	1	0	0	0	0	0	0	0	0	0	0	0	0	0	0	0	0	0	0	0	0	0	0	0	0	0	0	0	0	0	0	0.0102477	0	0	0	0	0	0	0	0	0	0	0	0
chr18	26052624	26078160	-	SS18	1	6	0	0	0	0	0	0	0	0	0	0	0	0	0	0	0	0	0	0	0	0	0	0	0	0	0	0	0.00847806	0	0	0	0	0	0	0	0	0	0.0196896	0	0	0.005728	0	0	0
chr18	26052624	26087577	-	SS18	1	3	0	0	0	0	0	0	0	0	0	0	0	0	0	0.0145222	0	0	0	0	0	0	0	0	0	0	0	0	0	0	0	0	0	0	0	0	0	0	0	0	0	0	0	0	0
chr18	26078076	26080423	-	SS18	1	1	0	0	0	0	0	0	0	0	0	0	0	0	0	0	0	0	0	0	0	0	0	0	0	0	0	0	0	0	0	0	0	0	0	0	0	0	0	0	0.0131307	0	0	0	0
chr18	26335231	26292246	+	TAF4B	1	1	0	0	0	0	0	0	0	0	0	0	0	0	0	0	0	0	0	0	0	0	0	0	0	0	0	0	0	0	0	0	0	0	0	0	0	0	0	0	0	0	0	0	0
chr10	77853354	77854370	-	DLG5	1	29	0	0	0.0155723	0.0244509	0	0	0	0.0226044	0	0	0	0.013703	0	0	0	0	0.0104998	0	0	0	0	0	0	0.0393401	0	0	0	0	0	0.0104822	0	0	0	0	0	0	0	0	0	0.011456	0	0	0
chr18	26335231	26315229	+	TAF4B	1	3	0	0	0	0	0	0	0	0	0	0	0	0	0	0	0	0	0	0	0	0	0	0	0	0	0	0	0	0	0	0	0	0	0	0	0	0	0	0	0	0	0	0	0
chr18	26357794	26315229	+	TAF4B	1	3	0	0	0	0	0	0	0	0	0	0	0	0	0	0	0	0	0	0	0	0	0	0	0	0	0	0	0	0	0	0	0	0	0	0	0	0	0	0	0	0	0	0.00800603	0
chr18	26476515	26501250	-	KCTD1	1	7	0	0	0	0	0	0	0	0	0	0	0	0	0	0	0	0	0	0	0.0207708	0	0	0	0	0	0	0	0	0	0	0	0	0	0	0	0	0	0	0	0	0	0	0.00800603	0
chr18	26710039	26709450	+	AQP4-AS1	1	1	0	0	0	0	0	0	0	0	0	0	0	0	0	0	0	0	0	0	0	0	0	0	0	0	0	0	0.00847806	0	0	0	0	0	0	0	0	0	0	0	0	0	0	0	0
chr18	26764331	26709450	+	AQP4-AS1	1	7	0	0	0	0	0	0	0	0	0	0	0	0	0	0	0	0	0	0	0.0207708	0	0	0	0	0	0.0143901	0.0256349	0.00847806	0	0	0	0	0	0	0	0	0	0	0	0	0.005728	0	0	0
chr18	2698041	2694527	+	SMCHD1	1	3	0	0	0	0	0	0	0	0	0	0	0	0	0	0	0	0	0	0	0	0	0	0	0	0	0	0	0	0	0	0	0	0	0	0	0	0	0	0	0	0	0	0	0
chr18	2700918	2700539	+	SMCHD1	1	1	0	0	0	0	0	0	0	0	0	0	0	0	0	0	0	0	0	0	0	0	0	0	0	0	0	0	0	0	0	0	0	0	0	0	0	0	0	0	0	0	0	0.0160121	0
chr18	2707920	2700539	+	SMCHD1	1	2	0	0	0	0	0	0	0	0	0	0	0	0	0	0	0	0	0	0	0	0	0	0	0	0	0	0.0128174	0	0	0	0	0	0	0	0	0	0	0	0	0	0	0	0	0
chr18	2718434	2718158	+	SMCHD1	1	3	0	0	0	0	0	0	0.0208984	0	0	0	0	0	0	0	0	0	0	0	0	0	0	0	0	0	0	0	0	0	0	0	0	0	0	0	0	0	0	0	0	0	0	0	0
chr18	2722663	2688394	+	SMCHD1	1	1	0	0	0	0	0	0	0	0	0	0	0	0	0	0	0	0	0	0	0	0	0	0	0	0	0	0	0	0	0	0	0	0	0	0	0	0	0	0	0	0	0	0.00800603	0
chr10	78002197	78007866	-	POLR3A	1	56	0.0265971	0	0.0155723	0	0	0.017942	0.0104492	0.0113022	0	0.0486218	0	0	0	0.0435666	0.0715462	0	0.0419994	0.00937882	0	0.0354709	0.0316324	0	0	0	0	0.0128174	0.00847806	0	0.0456055	0.0104822	0.0307431	0.0383618	0	0	0	0	0.0196896	0.0231969	0	0.005728	0	0.0160121	0
chr18	2739520	2700539	+	SMCHD1	1	1	0	0	0	0	0	0	0	0	0	0	0	0	0	0	0	0	0	0	0	0	0	0	0	0	0	0	0	0	0	0	0	0	0	0	0	0	0	0	0	0	0	0	0
chr18	2747647	2726452	+	SMCHD1	1	1	0	0	0	0	0	0	0	0	0	0	0	0	0	0	0	0	0	0	0	0	0	0	0	0	0	0	0	0	0	0	0	0	0	0	0	0	0	0	0	0	0	0	0
chr18	2752552	2724899	+	SMCHD1	1	5	0	0	0	0	0	0	0	0	0	0	0	0	0	0	0	0	0	0	0	0	0	0	0	0	0	0	0	0	0	0	0	0	0	0	0	0	0	0	0	0	0	0	0
chr18	2772372	2762105	+	SMCHD1	1	1	0	0	0	0	0	0	0	0	0	0	0	0	0	0	0	0	0	0	0	0	0	0	0	0	0	0	0	0	0	0	0	0	0	0	0	0	0	0	0	0.005728	0	0	0
chr18	2784621	2775734	+	SMCHD1	1	4	0	0	0	0	0	0	0	0	0	0	0	0	0	0	0	0	0	0	0	0	0	0	0	0	0	0	0	0	0	0	0	0	0	0	0	0	0	0	0	0	0	0	0
chr18	27963357	28013909	-	CDH2	1	2	0	0	0	0	0	0	0	0	0	0	0	0	0	0	0	0	0	0	0	0	0	0	0	0	0	0	0	0	0	0	0	0	0	0	0	0	0	0	0	0	0	0	0
chr18	2796521	2732265	+	SMCHD1	1	1	0	0	0	0	0	0	0	0	0	0	0	0	0	0	0	0	0	0	0	0	0	0	0	0	0	0	0	0	0	0	0	0	0	0	0	0	0	0	0	0	0	0	0
chr18	27982944	27993637	-	CDH2	1	3	0	0	0	0	0	0	0.0104492	0	0	0	0.0225478	0	0	0	0	0	0	0	0	0	0	0	0	0	0	0	0	0	0	0	0	0	0	0	0	0	0	0	0	0	0	0	0
chr18	27982944	28013909	-	CDH2	1	2	0	0	0	0	0	0	0	0	0	0	0	0	0	0	0	0	0	0	0	0	0	0	0	0	0	0	0	0.0148968	0	0	0	0	0	0	0	0	0	0	0	0	0	0	0
chr18	27982944	28147784	-	CDH2	1	1	0	0	0	0	0	0	0	0	0	0	0	0	0	0	0	0	0	0	0	0	0.0105441	0	0	0	0	0	0	0	0	0	0	0	0	0	0	0	0	0	0	0	0	0	0
chr10	106730050	106829673	-	SORCS1	1	2	0	0	0	0	0	0	0	0	0	0	0	0	0	0	0	0	0	0	0	0	0	0	0	0	0	0	0	0	0	0	0.0102477	0	0	0	0	0.0174408	0	0	0	0	0	0	0
chr10	78004716	78007866	-	POLR3A	1	4	0	0	0	0	0	0	0	0	0	0	0	0	0	0	0.0286185	0	0	0	0	0	0	0	0	0	0	0	0	0.0148968	0	0	0	0	0	0	0	0	0	0	0	0	0	0	0
chr18	28002997	28013909	-	CDH2	1	5	0	0	0.0155723	0	0	0	0	0	0	0	0	0	0	0	0	0	0	0	0	0	0	0	0	0	0	0	0	0	0	0	0	0	0	0	0	0	0	0	0	0	0	0	0
chr18	28002997	28147784	-	CDH2	1	3	0	0	0	0	0	0	0	0	0	0	0	0	0	0	0	0	0	0	0	0.0177355	0	0	0	0	0	0	0	0	0	0	0	0	0	0	0	0	0	0	0	0	0	0	0
chr18	2892486	2890561	+	EMILIN2	1	5	0	0	0	0	0	0	0	0	0	0.0162073	0	0	0	0	0	0	0	0	0	0	0	0	0	0	0	0.0128174	0	0.0148968	0	0	0	0	0	0	0	0	0	0	0	0	0	0	0
chr18	2951055	2960849	-	LPIN2	1	5	0	0	0	0	0	0	0	0	0	0	0	0	0	0	0	0	0	0	0	0	0	0	0	0	0	0	0.00847806	0	0	0	0	0	0	0	0	0	0	0	0	0	0	0	0
chr1	83096977	82996715	+	LINC01362	1	1	0	0	0	0	0	0	0	0	0	0	0	0	0	0	0	0	0.0104998	0	0	0	0	0	0	0	0	0	0	0	0	0	0	0	0	0	0	0	0	0	0	0	0	0	0
chr18	31630959	31645479	-	B4GALT6	1	1	0	0	0	0	0	0	0	0	0	0	0	0	0	0	0	0	0	0	0	0	0	0	0	0	0	0	0.00847806	0	0	0	0	0	0	0	0	0	0	0	0	0	0	0	0
chr18	31630959	31658089	-	B4GALT6	1	18	0	0	0	0	0	0	0	0.0113022	0	0.0162073	0	0	0	0	0	0	0	0	0	0	0.0105441	0	0	0	0	0	0	0	0.0152018	0.0104822	0	0	0	0	0	0	0	0	0.0262614	0.005728	0	0	0
chr18	31630959	31666372	-	B4GALT6	1	7	0	0	0	0	0	0	0	0	0	0	0	0	0	0	0	0	0	0.00937882	0	0	0	0	0	0	0	0.0128174	0	0	0	0	0	0	0	0	0	0	0	0.00773231	0	0	0	0	0
chr18	31832084	31839457	-	TRAPPC8	1	19	0	0	0	0	0	0	0.0313477	0	0	0.0486218	0	0	0	0.0435666	0	0.013398	0	0.00937882	0	0	0	0.0177926	0	0	0	0	0	0	0	0	0	0	0	0	0	0	0	0	0	0	0	0	0
chr18	31839312	31855807	-	TRAPPC8	1	1	0	0	0	0	0	0	0	0	0	0	0	0	0	0	0	0	0	0.00937882	0	0	0	0	0	0	0	0	0	0	0	0	0	0	0	0	0	0	0	0	0	0	0	0	0
chr10	7802854	7796121	+	ATP5C1	1	8	0	0	0	0	0	0	0	0	0	0	0	0	0	0	0	0	0	0	0	0	0	0	0	0	0	0	0.00847806	0	0	0	0	0	0	0	0	0	0	0	0	0	0	0.00800603	0.015239
chr18	31846716	31852663	-	TRAPPC8	1	1	0	0	0	0	0	0.00897101	0	0	0	0	0	0	0	0	0	0	0	0	0	0	0	0	0	0	0	0	0	0	0	0	0	0	0	0	0	0	0	0	0	0	0	0	0
chr18	31852446	31852663	-	TRAPPC8	1	3	0	0	0	0	0	0.00897101	0	0	0	0	0	0	0	0	0	0	0	0	0	0	0	0	0	0	0	0	0	0	0	0	0	0	0	0	0	0	0	0	0	0	0	0	0
chr18	31853849	31867476	-	TRAPPC8	1	3	0	0	0	0	0	0	0	0	0	0	0	0	0	0	0	0	0	0	0	0	0	0	0	0	0	0	0	0	0	0.0104822	0	0	0	0	0	0	0	0	0	0	0	0	0
chr18	31855660	31871120	-	TRAPPC8	1	1	0	0	0	0	0	0	0	0	0	0	0	0	0	0	0	0	0	0	0	0	0	0	0	0	0	0	0	0	0	0	0	0	0	0	0	0	0	0	0	0	0	0.00800603	0
chr18	31864627	31890866	-	TRAPPC8	1	1	0	0	0	0	0	0.017942	0	0	0	0	0	0	0	0	0	0	0	0	0	0	0	0	0	0	0	0	0	0	0	0	0	0	0	0	0	0	0	0	0	0	0	0	0
chr18	31864627	31909010	-	TRAPPC8	1	1	0	0	0	0	0	0	0	0	0	0	0	0.013703	0	0	0	0	0	0	0	0	0	0	0	0	0	0	0	0	0	0	0	0	0	0	0	0	0	0	0	0	0	0	0
chr18	31873430	31909760	-	TRAPPC8	1	3	0	0	0	0	0	0	0	0	0.0215419	0	0	0	0	0	0	0	0	0	0	0	0	0	0	0	0	0	0	0	0	0	0	0	0	0	0	0	0	0	0	0	0	0	0
chr18	31873430	31917667	-	TRAPPC8	1	1	0	0	0	0	0	0	0	0	0	0	0	0	0	0	0	0	0	0	0	0	0	0	0.0103481	0	0	0	0	0	0	0	0	0	0	0	0	0	0	0	0	0	0	0	0
chr18	31897786	31907610	-	TRAPPC8	1	1	0	0	0	0	0	0	0	0	0	0	0	0	0	0	0	0	0	0	0	0	0	0	0	0	0	0	0	0	0	0	0	0	0	0	0	0	0	0	0	0	0	0	0
chr18	31897786	31913522	-	TRAPPC8	1	2	0	0	0	0	0	0	0	0	0	0	0	0	0	0	0	0	0	0	0	0	0.0105441	0	0	0	0	0	0	0	0	0	0	0	0	0	0	0	0	0	0	0	0	0	0
chr10	7802854	7797047	+	ATP5C1	1	125	0.0664927	0.330715	0.0622892	0.122254	0.150883	0.188391	0.13584	0.056511	0.280045	0.0486218	0.0450957	0.232952	0.156397	0.290444	0.0715462	0.187572	0.0944986	0.131303	0.24925	0.141884	0.316324	0.142341	0.124177	0.295051	0.115121	0.089722	0.118693	0.208556	0.212826	0.136268	0.0409908	0.127873	0.360906	0.0592519	0.0564602	0.104645	0.118138	0.170111	0.131307	0.120288	0	0.104078	0.121912
chr18	31897786	31917667	-	TRAPPC8	1	4	0	0	0	0	0	0	0.0104492	0	0	0	0	0	0	0.0290444	0	0	0	0	0	0	0	0	0.0103481	0	0	0	0	0	0	0	0	0	0	0	0	0	0	0	0	0	0	0	0
chr18	31897786	31931523	-	TRAPPC8	1	2	0	0	0	0	0	0	0	0	0	0	0	0	0	0	0	0	0	0	0	0	0	0	0	0	0	0	0	0	0	0	0	0	0	0	0	0	0	0	0	0	0	0	0
chr18	31907460	31917667	-	TRAPPC8	1	23	0	0	0	0.0244509	0	0.00897101	0	0	0	0	0	0	0	0	0	0	0	0	0	0	0.0210882	0	0.0103481	0	0	0	0	0	0	0	0	0	0	0	0	0	0	0	0	0.005728	0	0	0
chr18	32113860	32111754	+	RNF138	1	52	0	0.0918652	0	0	0	0.026913	0.0313477	0	0	0	0.0676435	0.123327	0.117298	0.0290444	0.0286185	0.026796	0.0209997	0.0187576	0.145396	0	0.253059	0	0.0103481	0.0393401	0	0.115357	0.101737	0	0.0760092	0.0104822	0.0307431	0.0383618	0	0	0	0	0	0.0541262	0	0.045824	0	0.0400301	0.0609559
chr18	32124845	32111754	+	RNF138	1	80	0.0132985	0.0734921	0.0155723	0	0.201177	0.0717681	0.0208984	0.056511	0.0646258	0.0162073	0	0.0685152	0	0.0580888	0	0.026796	0.0524992	0	0.0830832	0	0	0	0.0413924	0	0.0431703	0	0.110215	0.0595873	0.0608073	0	0	0.0255745	0	0	0	0.104645	0.098448	0	0.0131307	0.045824	0.095901	0.0800603	0
chr18	32126800	32111754	+	RNF138	1	14	0	0	0	0	0	0	0	0	0	0	0	0.13703	0	0	0.0143092	0	0	0	0	0	0	0	0	0	0	0.128174	0	0.0595873	0	0.0419287	0	0	0	0	0	0	0	0.0231969	0	0	0	0	0
chr18	33627070	33605435	+	ASXL3	1	9	0	0	0	0	0	0	0	0	0	0	0	0	0	0	0	0	0.0104998	0.00937882	0	0	0	0	0	0	0	0	0	0	0	0	0.0102477	0	0	0	0	0	0	0	0	0.005728	0	0.00800603	0
chr18	33627070	33607594	+	ASXL3	1	15	0	0	0	0	0	0	0	0	0	0	0	0	0	0.0145222	0	0	0	0.00937882	0	0	0	0	0	0	0	0	0	0.0297937	0	0	0	0	0	0	0	0	0	0.00773231	0	0	0	0	0
chr18	33627070	33626862	+	ASXL3	1	1	0	0	0	0	0	0	0	0	0	0	0	0	0	0	0	0	0	0	0	0	0	0	0	0	0	0	0	0	0	0.0104822	0	0	0	0	0	0	0	0	0	0	0	0	0
chr18	33646353	33607594	+	ASXL3	1	16	0	0	0	0	0	0.00897101	0	0	0	0	0	0.013703	0	0	0	0	0	0	0	0	0.0105441	0	0	0	0	0.0128174	0	0	0	0	0	0	0	0	0	0	0	0	0	0	0	0	0
chr10	7802854	7798990	+	ATP5C1	1	25	0	0	0	0	0	0	0	0	0	0	0	0	0	0	0	0	0	0	0	0	0.0316324	0	0	0	0	0	0	0	0	0.0104822	0	0	0	0	0	0	0	0	0	0	0.0383604	0	0
chr18	33646353	33626862	+	ASXL3	1	7	0.0132985	0	0	0	0	0	0	0.0113022	0	0	0	0	0	0	0	0	0	0	0	0	0	0	0	0.01967	0	0	0	0	0	0	0	0	0	0	0	0	0	0	0	0.005728	0	0	0
chr18	33646353	33626873	+	ASXL3	1	2	0	0	0	0	0	0	0	0	0	0	0	0	0	0	0	0	0.0104998	0	0	0	0	0	0	0	0	0	0	0	0	0	0	0	0	0.0197506	0	0	0	0	0	0	0	0	0
chr18	33670790	33607594	+	ASXL3	1	1	0	0	0	0	0	0	0	0	0	0	0	0	0	0.0145222	0	0	0	0	0	0	0	0	0	0	0	0	0	0	0	0	0	0	0	0	0	0	0	0	0	0	0	0	0
chr18	33671866	33607594	+	ASXL3	1	17	0	0	0.0155723	0	0	0	0	0	0	0	0	0	0	0	0	0	0	0	0	0	0	0	0	0	0	0	0.00847806	0	0	0	0	0	0	0	0	0	0	0	0.0131307	0	0	0	0
chr18	33671866	33626862	+	ASXL3	1	12	0	0	0.0155723	0	0	0	0	0	0	0.0162073	0	0	0	0	0	0	0	0	0	0	0	0	0	0	0	0	0	0.0148968	0	0	0	0.0127873	0	0	0	0	0	0	0	0	0	0	0
chr18	33671866	33641821	+	ASXL3	1	9	0	0	0	0	0	0	0	0	0	0	0	0	0	0	0	0	0	0.00937882	0	0	0	0	0.0103481	0	0	0	0	0	0	0	0	0	0	0	0	0	0	0	0	0.005728	0	0	0
chr18	33683568	33605435	+	ASXL3	1	3	0	0	0	0	0	0	0	0	0	0	0	0	0	0	0	0	0	0	0	0	0	0	0	0	0	0	0	0	0	0	0	0	0	0	0	0	0	0	0	0.005728	0	0	0
chr18	33683568	33607594	+	ASXL3	1	29	0	0	0	0.0244509	0	0	0.0104492	0	0	0	0.0225478	0	0	0	0	0	0	0.0375153	0.0207708	0	0	0	0	0.01967	0	0	0	0	0	0.0104822	0.0204954	0	0	0	0	0	0.0590688	0	0	0	0	0.0160121	0
chr18	33683568	33626862	+	ASXL3	1	33	0.0132985	0.018373	0	0	0	0	0	0.0339066	0	0	0	0	0	0	0.0143092	0	0	0	0	0	0.0105441	0	0	0	0	0.0128174	0	0	0	0	0	0	0	0	0	0	0	0	0.0131307	0.005728	0	0.0480362	0
chr18	33683568	33626873	+	ASXL3	1	9	0	0	0	0	0	0	0	0	0	0	0	0	0	0	0	0.013398	0	0	0	0	0	0	0.0103481	0	0.0143901	0	0.00847806	0	0	0	0	0	0	0	0	0	0	0	0	0	0	0	0
chr10	79162133	79118915	+	ZMIZ1	1	3	0	0	0	0	0	0	0	0	0	0	0	0	0	0	0	0	0	0	0	0	0	0	0	0	0	0	0.00847806	0	0	0	0	0	0	0	0	0	0	0	0	0.005728	0	0	0
chr18	33683568	33641821	+	ASXL3	1	25	0	0.018373	0	0	0	0.00897101	0	0.0113022	0	0	0	0	0	0.0145222	0	0	0	0.0187576	0	0	0.0210882	0	0	0	0	0.0384523	0	0	0	0	0	0.0127873	0	0	0	0	0	0	0	0	0	0	0
chr18	33683568	33644894	+	ASXL3	1	24	0	0	0.0155723	0	0	0	0	0	0	0	0	0	0	0	0	0	0.0104998	0	0	0	0	0	0	0	0	0	0	0	0	0	0.0204954	0	0	0	0.0282301	0	0	0	0	0.011456	0	0	0
chr18	33683568	33661616	+	ASXL3	1	4	0	0	0	0	0	0	0	0	0	0	0	0	0	0	0	0	0	0	0	0	0.0105441	0	0	0	0	0	0	0	0	0	0	0	0	0	0	0	0	0	0	0.005728	0	0	0
chr18	33883244	33943178	-	NOL4	1	3	0	0	0	0	0	0	0	0	0	0	0	0	0	0	0	0	0	0	0	0	0	0	0	0	0	0	0	0.0148968	0	0	0	0	0	0	0	0	0	0	0	0	0	0	0
chr18	34019318	34105160	-	NOL4	1	2	0	0	0	0	0	0	0	0	0	0	0	0	0	0	0	0	0	0	0	0	0	0	0	0	0	0	0	0	0	0	0	0	0	0	0	0	0	0	0	0	0	0	0
chr18	34093465	34105160	-	NOL4	1	51	0	0.018373	0.0311446	0.0244509	0	0.00897101	0	0.0113022	0	0	0	0	0	0	0	0	0.0734989	0.0281364	0.0415416	0	0.0421765	0.0177926	0	0.01967	0.0143901	0	0.00847806	0	0.0304037	0	0.0409908	0.0127873	0	0.0197506	0.0282301	0	0	0	0	0.017184	0	0.0240181	0
chr18	34093465	34130020	-	NOL4	1	53	0	0.018373	0	0.0244509	0.0251472	0	0.0104492	0	0.0646258	0.0162073	0	0.013703	0	0.0145222	0.0143092	0.026796	0.0209997	0	0.0207708	0	0.0527206	0	0.0103481	0	0	0.0128174	0	0	0	0	0	0.0127873	0.0601511	0	0	0	0.0393792	0	0.0131307	0	0	0	0.015239
chr18	34093465	34183626	-	NOL4	1	1	0	0	0	0	0	0	0	0	0	0	0	0	0	0	0	0	0	0	0	0	0	0	0	0	0	0	0	0	0	0	0	0	0	0	0	0	0	0	0	0	0	0	0
chr18	34104047	34105160	-	NOL4	1	3	0	0	0	0	0	0	0	0	0	0	0	0	0	0	0	0	0	0	0	0	0	0	0	0	0	0	0.00847806	0	0	0	0	0	0	0	0	0	0	0	0	0	0	0	0
chr18	34679592	34513515	+	DTNA	1	8	0	0	0	0	0	0	0	0	0	0	0	0	0	0.0145222	0	0	0.0104998	0	0	0	0	0	0	0	0	0.0256349	0.00847806	0	0	0	0	0	0	0	0	0	0	0	0	0	0	0	0
chr10	79216274	79118915	+	ZMIZ1	1	6	0	0	0	0	0	0	0	0	0	0	0	0	0	0.0145222	0.0143092	0	0	0	0	0	0.0105441	0	0	0	0	0.0128174	0	0	0	0	0	0	0	0	0	0	0	0	0	0	0	0	0
chr18	34683694	34513515	+	DTNA	1	1	0	0	0	0	0	0	0	0	0	0	0	0	0	0	0	0	0	0	0	0	0	0	0	0	0	0	0	0	0	0	0	0	0	0	0	0	0	0	0	0	0	0	0
chr18	34683694	34679468	+	DTNA	1	4	0	0	0	0	0	0	0	0	0	0	0	0	0	0	0	0	0	0	0	0	0	0	0	0	0	0	0.00847806	0	0	0	0	0	0	0	0.0564602	0	0	0	0	0	0	0	0
chr18	34766041	34513515	+	DTNA	1	9	0	0	0	0	0.0251472	0	0	0	0	0	0	0	0	0	0	0	0	0.00937882	0	0	0	0	0	0	0	0	0	0	0	0	0	0	0	0	0	0	0	0	0	0.005728	0	0	0
chr18	34766041	34679468	+	DTNA	1	32	0	0	0	0	0	0	0	0.0113022	0	0	0	0	0	0.0145222	0	0	0	0.0187576	0	0	0.0105441	0	0.0206962	0	0	0.0128174	0	0	0	0	0	0	0.0300755	0	0.0282301	0	0	0	0.0262614	0	0	0.00800603	0.015239
chr18	34766041	34755976	+	DTNA	1	9	0	0	0	0.0244509	0	0	0	0	0	0	0	0	0	0	0	0	0.0209997	0.00937882	0	0	0	0	0	0	0	0	0	0.0148968	0	0	0	0	0	0	0	0	0.0196896	0	0	0	0	0	0
chr18	34794250	34679468	+	DTNA	1	17	0.0132985	0.018373	0	0	0.0251472	0	0	0.0113022	0.0215419	0	0	0	0	0	0	0	0	0	0	0	0	0	0	0	0	0.0128174	0	0	0.0152018	0	0	0	0	0	0	0.0523225	0.0196896	0	0	0	0	0	0
chr18	34794250	34755976	+	DTNA	1	87	0	0	0.0622892	0	0	0.017942	0	0.0339066	0.0430839	0.0162073	0.0225478	0	0.0195497	0.072611	0	0	0	0.00937882	0.0415416	0.0177355	0.0210882	0.0177926	0.0206962	0	0.0575603	0.0512697	0.0169561	0.0595873	0.0152018	0.0314465	0.0204954	0.0255745	0.0902266	0.0395013	0	0.0348817	0.098448	0.0386616	0.0656535	0.022912	0.0383604	0.0320241	0
chr18	34812113	34806219	+	DTNA	1	1	0	0	0	0	0	0	0.0104492	0	0	0	0	0	0	0	0	0	0	0	0	0	0	0	0	0	0	0	0	0	0	0	0	0	0	0	0	0	0	0	0	0	0	0	0
chr18	34820915	34794037	+	DTNA	1	1	0	0	0	0	0	0	0	0	0	0	0	0	0	0	0	0	0	0	0	0	0	0	0	0	0	0	0	0	0	0	0	0	0	0	0	0	0	0	0	0	0	0	0
chr18	34827676	34755976	+	DTNA	1	9	0	0	0	0	0	0	0	0	0	0	0	0	0	0	0	0	0	0	0	0	0	0	0	0	0	0	0	0	0	0	0	0	0	0	0	0.0174408	0	0	0	0	0	0.00800603	0
chr10	79216274	79162053	+	ZMIZ1	1	4	0	0	0	0	0	0	0	0	0	0	0	0	0	0	0	0	0	0	0	0	0	0	0	0	0	0	0	0	0	0	0	0	0	0	0	0	0	0	0	0	0	0	0
chr18	34827676	34794037	+	DTNA	1	9	0	0	0	0	0	0	0	0	0	0	0	0	0	0	0	0	0	0	0	0	0	0	0	0	0	0.0128174	0	0	0	0	0	0	0	0	0	0	0	0	0	0	0	0	0
chr18	34827676	34806219	+	DTNA	1	3	0	0	0	0	0	0	0	0	0	0	0	0	0	0	0	0	0	0	0	0	0.0105441	0	0	0	0	0	0	0	0	0	0	0	0	0	0	0	0	0	0	0	0	0	0
chr18	34848383	34820791	+	DTNA	1	3	0	0	0	0	0	0	0	0	0	0	0	0	0	0	0	0	0	0	0	0	0.0210882	0	0	0	0	0.0128174	0	0	0	0	0	0	0	0	0	0	0	0	0	0	0	0	0
chr18	34851928	34818164	+	DTNA	1	1	0	0	0	0	0	0	0	0	0	0	0	0	0	0.0145222	0	0	0	0	0	0	0	0	0	0	0	0	0	0	0	0	0	0	0	0	0	0	0	0	0	0	0	0	0
chr18	34851928	34820791	+	DTNA	1	1	0	0	0	0	0	0	0	0	0	0	0	0	0	0	0	0	0	0	0	0	0	0	0	0	0	0	0	0	0	0.0104822	0	0	0	0	0	0	0	0	0	0	0	0	0
chr18	34875398	34851831	+	DTNA	1	4	0	0	0	0	0	0	0	0.0113022	0	0	0	0	0	0	0	0	0	0	0	0	0.0105441	0	0	0	0	0	0	0	0	0	0	0	0	0	0	0	0	0	0	0	0	0	0
chr18	34882201	34858285	+	DTNA	1	1	0	0	0	0	0	0	0	0	0	0	0	0	0	0	0	0	0	0	0	0	0	0	0	0	0	0	0	0	0	0.0104822	0	0	0	0	0	0	0	0	0	0	0	0	0
chr18	35102159	35070195	+	MAPRE2	1	46	0	0	0	0.0244509	0	0	0	0	0	0	0	0	0	0.0290444	0	0	0.0104998	0	0.0207708	0.0354709	0	0	0	0	0	0.0128174	0.0254342	0	0.0152018	0.0209643	0	0	0	0	0	0	0.0196896	0	0.0131307	0.005728	0	0.0160121	0
chr18	35102159	35097446	+	MAPRE2	1	3	0	0	0.0155723	0	0	0	0	0	0	0	0	0	0	0	0	0	0	0	0	0	0	0	0	0	0	0	0	0	0	0	0	0	0	0	0	0	0	0	0	0	0	0	0
chr18	35132190	35070195	+	MAPRE2	1	1	0	0	0	0	0	0	0	0	0	0	0	0	0	0	0	0	0	0	0	0	0	0	0	0	0	0	0	0	0	0	0	0	0	0	0	0	0	0	0	0	0	0	0
chr10	79216274	79201584	+	ZMIZ1	1	5	0	0	0	0	0	0	0	0	0	0	0	0	0	0.0145222	0	0	0	0	0	0	0	0	0	0	0	0	0	0	0	0	0	0	0	0	0	0	0	0	0.0131307	0	0	0	0
chr18	3534194	3534615	-	DLGAP1	1	5	0	0	0	0	0	0	0	0	0	0	0	0	0	0	0	0.013398	0	0.00937882	0	0	0	0	0	0	0	0	0	0	0	0	0	0	0	0	0	0	0	0	0	0	0	0	0
chr18	3534194	3582248	-	DLGAP1	1	49	0	0	0.0155723	0	0.0502943	0	0	0.0113022	0.0646258	0	0	0	0	0.0145222	0	0.026796	0.0104998	0.00937882	0	0	0.0316324	0	0	0.01967	0	0.0256349	0	0	0	0.0314465	0.0204954	0.0255745	0	0	0	0	0	0	0	0.011456	0	0.0320241	0
chr18	3567490	3582248	-	DLGAP1	1	43	0	0	0	0	0	0	0	0	0.0430839	0	0	0	0	0	0.0286185	0.013398	0	0	0	0	0.0316324	0.0177926	0	0	0	0	0.00847806	0	0.0152018	0.0104822	0	0	0	0	0	0.0174408	0.0196896	0	0	0.011456	0	0	0
chr18	3567490	3656113	-	DLGAP1	1	2	0	0	0	0	0	0	0	0	0	0	0.0225478	0	0	0	0	0	0	0	0	0	0	0	0	0	0	0	0	0	0	0	0	0	0	0	0	0	0	0	0	0	0	0	0
chr18	35683598	35677591	+	GALNT1	1	1	0	0	0	0	0	0	0	0	0	0	0	0	0	0	0	0	0	0	0	0	0	0	0	0	0	0	0	0	0	0	0	0	0	0	0	0	0	0	0	0	0	0	0
chr18	3581875	3582248	-	DLGAP1	1	2	0	0	0	0	0	0	0	0	0	0	0	0	0	0	0	0	0	0	0	0	0	0	0	0	0	0	0	0	0	0	0	0	0	0	0	0	0	0	0	0	0	0	0
chr18	36026900	36033837	-	RPRD1A	1	97	0	0	0.0311446	0.0489018	0.0251472	0.00897101	0.0208984	0.0226044	0.0430839	0	0	0.0274061	0.0195497	0.0580888	0.0286185	0.013398	0.0104998	0.0281364	0	0.0177355	0	0.0355851	0.0103481	0.01967	0.0143901	0.0512697	0.00847806	0.0446905	0	0.0314465	0.0102477	0	0	0.0197506	0	0.0697634	0.0590688	0.0154646	0.0525228	0.017184	0	0.0640482	0
chr18	36026900	36040865	-	RPRD1A	1	2	0	0	0	0	0	0	0	0	0	0	0	0	0	0	0	0	0	0	0	0	0.0105441	0	0	0	0	0	0	0	0	0	0	0	0	0	0	0	0	0	0	0	0	0	0
chr18	36111059	36127016	-	SLC39A6	1	9	0	0	0	0	0	0	0	0.0226044	0	0	0	0	0	0	0	0	0	0	0	0	0	0	0	0	0	0.0128174	0	0	0	0	0.0102477	0	0	0	0	0	0	0	0	0	0	0.00800603	0
chr18	36146048	36142826	+	ELP2	1	12	0	0.018373	0	0	0	0	0	0	0	0	0	0	0	0	0	0	0	0	0	0	0	0	0	0	0	0.0256349	0	0	0	0	0.0102477	0	0	0	0	0	0	0	0	0.011456	0	0.00800603	0
chr10	80053396	80060933	-	TMEM254-AS1	1	2	0	0	0	0	0	0	0	0	0	0	0	0	0	0	0	0	0	0	0	0	0.0105441	0	0	0	0	0	0	0	0	0	0	0	0	0	0	0	0	0	0	0	0	0	0
chr18	36146381	36141137	+	ELP2	1	2	0	0	0	0	0	0	0	0	0	0	0	0	0	0	0	0	0	0	0	0	0	0	0	0	0	0	0	0	0	0	0	0	0	0	0	0	0	0	0	0	0	0	0
chr18	36146381	36142281	+	ELP2	1	12	0	0	0	0	0	0	0	0	0	0	0	0	0	0	0	0	0.0104998	0	0	0.0177355	0	0	0	0	0	0	0.00847806	0	0	0.0104822	0	0	0.0300755	0	0	0	0	0	0	0	0	0	0
chr18	36159830	36136307	+	ELP2	1	2	0	0	0	0	0	0	0	0	0	0	0	0	0	0	0	0	0	0	0	0	0.0105441	0	0	0	0	0	0	0	0	0	0	0	0	0	0	0	0	0	0	0	0	0	0
chr18	36159830	36142281	+	ELP2	1	4	0	0	0	0	0	0	0	0	0	0	0	0	0	0	0	0	0	0	0.0207708	0	0	0	0	0	0	0	0	0	0	0	0	0	0	0	0	0	0	0	0	0	0	0	0
chr18	36160015	36141137	+	ELP2	1	20	0	0	0.0155723	0	0	0	0	0	0	0	0	0.013703	0	0.0145222	0	0	0	0	0	0	0	0	0.0103481	0	0.0143901	0.0256349	0	0	0.0152018	0	0.0102477	0	0	0	0	0	0	0	0	0	0	0	0
chr18	36160015	36142281	+	ELP2	1	27	0	0	0	0	0	0	0.0208984	0.0339066	0	0	0	0	0.0195497	0	0	0	0	0	0	0	0	0	0	0	0	0.0128174	0	0	0	0	0	0.0255745	0	0	0	0	0	0	0	0.017184	0.0191802	0	0
chr18	36164667	36141137	+	ELP2	1	9	0	0	0	0	0	0	0	0	0	0	0	0	0	0	0	0	0	0	0	0	0	0	0	0	0	0	0	0	0	0	0	0	0	0	0	0	0	0	0.0131307	0	0	0	0
chr18	36164667	36142281	+	ELP2	1	6	0	0	0	0	0	0	0	0	0	0	0	0.0274061	0	0	0	0	0	0	0	0	0	0	0	0	0	0	0	0	0	0	0	0	0	0	0	0	0	0.00773231	0	0	0	0	0
chr18	36512543	36355539	+	FHOD3	1	2	0	0	0	0	0	0	0	0	0	0	0	0	0	0	0	0	0	0	0	0	0	0	0	0	0	0	0	0.0148968	0	0	0	0	0	0	0	0	0	0	0	0	0	0	0
chr18	3656084	3742512	-	DLGAP1	1	1	0	0	0	0	0	0	0	0	0	0	0	0	0	0	0	0	0	0	0	0	0	0	0	0	0	0.0128174	0	0	0	0	0	0	0	0	0	0	0	0	0	0	0	0	0
chr10	80427496	80425866	+	FAM213A	1	10	0	0	0	0	0	0	0	0	0	0	0	0	0	0	0	0	0	0	0.0207708	0	0.0105441	0	0	0	0	0	0	0	0.0152018	0	0	0	0	0	0	0	0	0	0.0131307	0.005728	0	0	0
chr18	3656084	3814273	-	DLGAP1	1	1	0	0	0	0	0	0	0	0	0	0	0	0	0	0	0	0	0	0	0	0	0	0	0	0	0	0	0	0	0	0	0	0	0	0	0	0	0	0	0	0	0	0.00800603	0
chr18	36602768	36576451	+	FHOD3	1	1	0	0	0	0	0	0	0	0	0	0	0	0	0	0	0	0	0	0	0	0	0.0105441	0	0	0	0	0	0	0	0	0	0	0	0	0	0	0	0	0	0	0	0	0	0
chr18	36625749	36576451	+	FHOD3	1	1	0	0	0	0	0	0	0	0	0	0	0	0	0	0	0	0	0	0	0	0	0	0	0	0	0	0	0	0.0148968	0	0	0	0	0	0	0	0	0	0	0	0	0	0	0
chr18	36693423	36658075	+	FHOD3	1	7	0	0	0	0	0	0	0	0	0	0	0	0.013703	0	0	0	0	0	0	0	0	0	0	0.0103481	0	0	0	0	0	0	0	0	0	0	0	0	0	0	0	0	0	0	0	0
chr18	36693423	36681436	+	FHOD3	1	13	0	0	0	0	0	0	0	0	0	0	0	0	0	0	0	0	0	0	0	0	0	0	0	0	0	0.0384523	0	0	0	0.0104822	0	0	0	0	0	0	0	0	0	0	0	0	0
chr18	37067545	37066890	+	KIAA1328	1	9	0	0	0	0	0.0251472	0	0	0	0	0	0	0	0	0	0	0	0	0.00937882	0	0	0.0105441	0	0	0	0	0	0	0	0	0	0	0	0	0	0	0	0	0	0	0.011456	0	0	0
chr18	37084232	37066890	+	KIAA1328	1	12	0	0	0	0	0	0	0	0	0	0.0162073	0	0	0	0	0	0	0	0	0	0	0	0	0	0	0	0	0	0	0	0	0	0	0	0	0	0	0	0	0.0131307	0	0	0	0
chr18	37160381	37066890	+	KIAA1328	1	2	0	0	0.0155723	0	0	0	0	0	0	0	0	0	0	0	0	0	0	0	0	0	0	0	0	0	0	0	0	0	0	0	0	0	0	0	0	0	0	0	0	0	0	0	0
chr18	37173081	37066890	+	KIAA1328	1	4	0	0	0	0	0	0	0	0.0113022	0	0	0	0	0	0	0	0	0	0	0	0	0.0105441	0	0	0	0	0	0	0	0	0	0	0	0	0	0	0	0	0	0	0	0	0.00800603	0
chr18	37173081	37160200	+	KIAA1328	1	10	0	0	0.0155723	0	0	0	0	0	0	0	0	0	0	0	0	0	0	0.00937882	0	0	0	0	0	0	0	0	0	0	0	0	0	0	0	0	0	0	0	0	0.0131307	0.005728	0	0	0
chr10	106761588	106776692	-	SORCS1	1	5	0	0	0	0	0	0	0	0.0113022	0	0	0	0	0	0	0	0	0	0	0	0	0	0	0	0	0	0	0	0.0148968	0.0152018	0	0	0.0127873	0	0	0	0	0	0	0.0131307	0	0	0	0
chr10	829385	845055	-	LARP4B	1	9	0	0	0	0.0244509	0	0.017942	0	0	0	0	0	0	0	0	0	0	0	0	0	0	0	0	0	0	0	0.0128174	0	0	0	0	0	0	0	0	0	0	0	0	0	0	0	0	0
chr18	3729135	3729375	-	DLGAP1	1	12	0	0	0	0	0.0251472	0	0	0	0	0	0	0	0	0	0	0	0	0.00937882	0	0	0	0	0	0	0	0	0	0	0	0.0209643	0	0	0	0.0197506	0	0	0	0	0	0	0	0.0240181	0
chr18	3729135	3742512	-	DLGAP1	1	2	0	0	0	0	0	0	0	0	0	0	0	0	0	0	0	0	0	0	0	0	0	0	0	0	0	0	0.00847806	0	0	0	0	0	0	0	0	0	0	0	0	0	0	0	0
chr18	3729135	3814273	-	DLGAP1	1	7	0	0	0	0	0	0	0	0	0	0	0	0	0	0	0	0	0	0	0	0	0	0	0	0	0	0.0128174	0	0	0	0	0	0	0	0	0	0	0	0	0	0	0	0	0
chr1	83882963	83907661	-	TTLL7	1	2	0	0	0	0	0	0	0	0	0	0	0	0	0	0	0	0	0	0	0	0	0	0	0	0	0	0	0	0	0	0	0	0	0	0	0	0	0	0.00773231	0	0	0	0	0
chr1	83882963	83952387	-	TTLL7	1	12	0	0	0	0	0	0	0	0	0	0	0	0	0	0.0145222	0	0	0	0	0	0	0	0	0	0	0	0	0	0	0	0	0	0	0	0	0	0	0	0	0	0.005728	0	0	0
chr1	83890321	83906463	-	TTLL7	1	1	0	0	0	0	0	0	0	0	0	0	0	0	0	0	0	0	0	0	0	0	0	0	0	0	0	0	0	0	0	0	0	0	0	0	0	0	0	0	0	0.005728	0	0	0
chr1	83890321	83907661	-	TTLL7	1	8	0	0	0	0	0.0251472	0	0	0	0	0	0	0	0	0	0	0	0	0	0	0	0	0	0	0	0	0	0	0	0	0	0	0	0	0	0	0	0	0	0	0	0	0.0160121	0
chr1	83890321	83911363	-	TTLL7	1	30	0	0	0.0155723	0	0	0	0.0104492	0	0	0	0	0	0.0195497	0.0290444	0	0	0	0	0	0	0.0210882	0	0.0103481	0	0.0143901	0	0.0169561	0	0	0	0	0	0	0.0197506	0	0	0	0	0	0	0	0	0
chr1	83890321	83929230	-	TTLL7	1	3	0	0	0	0	0	0	0	0	0	0	0	0	0	0	0	0	0	0	0	0	0	0	0	0	0	0	0	0	0	0	0	0	0	0	0	0	0	0	0	0	0	0	0
chr1	83890321	83933766	-	TTLL7	1	9	0	0	0	0	0	0	0.0104492	0	0	0	0	0	0	0	0	0	0.0104998	0	0	0	0	0.0177926	0	0	0	0	0	0	0	0	0	0	0	0	0	0	0	0	0	0	0	0	0.015239
chr10	82959075	82358739	+	NRG3	1	1	0	0	0	0	0	0	0	0	0	0	0	0	0	0	0	0	0	0	0	0	0	0	0	0	0	0	0	0	0	0	0	0	0	0	0	0	0	0	0	0.005728	0	0	0
chr1	83890321	83938016	-	TTLL7	1	1	0	0	0	0	0	0	0	0	0	0	0	0	0	0	0	0	0	0	0	0	0	0	0	0	0	0	0	0	0	0	0	0	0	0	0	0	0	0	0	0	0	0	0
chr1	83890321	83942679	-	TTLL7	1	6	0	0	0	0	0	0	0	0	0	0	0	0	0	0	0	0	0	0	0	0	0	0	0	0	0	0	0.00847806	0	0	0	0	0	0	0	0	0	0	0	0	0	0	0	0
chr1	83890321	83952387	-	TTLL7	1	6	0	0	0	0	0	0	0	0	0	0	0	0	0	0	0	0	0	0	0	0	0	0	0	0	0.0143901	0	0	0	0	0	0	0	0	0	0	0	0	0	0	0	0	0	0
chr1	83904079	83929230	-	TTLL7	1	6	0	0	0	0	0	0	0	0	0	0.0162073	0	0	0	0	0	0	0	0	0	0	0	0	0	0	0	0	0	0	0	0	0	0	0	0	0	0	0	0	0	0	0	0	0
chr1	83904079	83933766	-	TTLL7	1	8	0	0	0	0	0	0	0	0	0	0	0	0.013703	0	0	0	0	0	0	0	0	0	0	0	0	0	0	0	0	0	0	0	0	0	0	0	0	0	0	0	0	0	0	0
chr1	83904079	83938016	-	TTLL7	1	6	0	0	0	0	0	0	0	0	0	0	0	0	0	0	0	0	0	0	0	0	0	0.0177926	0	0	0	0	0	0	0	0	0	0	0	0	0	0	0	0	0	0	0	0	0
chr1	83904079	83947282	-	TTLL7	1	9	0	0	0	0	0	0	0	0	0	0	0	0	0	0	0	0	0	0	0	0.0177355	0	0	0	0	0	0	0	0	0	0	0	0	0	0	0	0	0	0.00773231	0	0	0	0	0
chr1	83904079	83952387	-	TTLL7	1	4	0	0	0	0	0	0	0	0	0	0	0	0	0	0	0	0	0	0	0	0	0	0	0	0	0	0	0	0	0	0	0	0	0	0	0	0	0	0	0	0	0	0	0
chr1	83907456	83933766	-	TTLL7	1	1	0	0	0	0	0	0	0	0	0	0	0	0	0	0	0	0	0	0	0	0	0	0	0	0	0	0	0	0	0	0	0	0	0.0601511	0	0	0	0	0	0	0	0	0	0
chr1	83911165	83921394	-	TTLL7	1	2	0	0	0	0	0	0	0	0	0	0	0	0	0	0	0	0	0	0	0	0	0	0	0	0	0	0	0	0	0	0.0104822	0	0	0	0	0	0	0	0	0	0	0	0	0
chr10	82973915	82738577	+	NRG3	1	1	0	0	0	0	0	0	0	0	0.0215419	0	0	0	0	0	0	0	0	0	0	0	0	0	0	0	0	0	0	0	0	0	0	0	0	0	0	0	0	0	0	0	0	0	0
chr1	83911165	83929230	-	TTLL7	1	2	0	0	0	0	0	0	0	0	0	0	0.0225478	0	0	0	0	0	0	0	0	0	0	0	0	0	0	0	0	0	0	0	0	0	0	0	0	0	0	0	0	0	0	0	0
chr1	83911165	83938016	-	TTLL7	1	1	0	0	0	0	0	0	0	0	0	0	0	0	0	0	0	0	0	0	0	0.0177355	0	0	0	0	0	0	0	0	0	0	0	0	0	0	0	0	0	0	0	0	0	0	0
chr1	83911165	83942679	-	TTLL7	1	3	0	0	0	0	0	0	0	0	0	0	0	0	0	0	0	0	0	0	0	0	0	0.0177926	0	0	0	0	0	0	0	0	0	0	0	0	0	0	0	0	0	0	0	0	0
chr1	83911165	83947282	-	TTLL7	1	104	0	0.0367461	0.0155723	0.0489018	0.0754415	0	0.0208984	0.0226044	0	0	0.0225478	0.0685152	0.0390993	0.0435666	0.0143092	0.026796	0.0104998	0.00937882	0.0415416	0	0.0316324	0	0.0103481	0.0393401	0.0143901	0.089722	0.0678244	0.0446905	0	0	0.0204954	0.0255745	0.0601511	0.0790026	0.0282301	0	0.0196896	0	0.0131307	0.022912	0.0191802	0.0480362	0.030478
chr1	83917604	83938016	-	TTLL7	1	1	0	0	0	0	0	0	0	0	0	0	0	0	0	0	0	0	0	0	0	0	0	0	0	0	0	0	0	0	0	0	0	0	0	0	0	0	0	0.00773231	0	0	0	0	0
chr1	83917604	83942679	-	TTLL7	1	8	0	0.018373	0	0	0	0	0	0	0	0	0	0	0	0.0435666	0	0	0	0	0	0	0	0	0	0	0	0	0	0	0	0	0	0	0	0.0197506	0	0	0	0	0	0	0	0	0
chr1	83929136	83942679	-	TTLL7	1	3	0	0	0	0	0	0	0	0	0	0	0	0	0	0	0	0	0	0	0	0	0	0	0	0	0	0	0.00847806	0	0	0	0	0	0	0	0	0	0	0	0	0	0	0	0
chr1	83929136	83947282	-	TTLL7	1	1	0	0	0	0	0	0	0	0	0	0	0	0	0	0	0	0	0	0	0	0	0.0105441	0	0	0	0	0	0	0	0	0	0	0	0	0	0	0	0	0	0	0	0	0	0
chr1	83929136	83952387	-	TTLL7	1	2	0	0	0	0	0	0	0	0	0	0	0	0	0	0	0	0	0	0	0	0	0	0	0.0103481	0	0	0	0	0	0	0	0	0	0	0	0	0	0	0	0	0	0	0	0
chr1	83933608	83952387	-	TTLL7	1	4	0	0	0	0	0	0	0	0	0	0	0	0	0	0	0	0	0.0104998	0	0	0	0	0	0	0	0	0	0	0	0	0	0	0	0	0	0	0	0	0	0	0.005728	0	0	0
chr10	82979120	82951469	+	NRG3	1	1	0	0	0	0	0	0	0	0	0	0	0	0	0	0	0	0	0	0	0	0	0	0	0	0	0	0	0	0	0	0	0	0	0	0	0	0	0	0	0	0	0	0	0
chr1	83947124	83952387	-	TTLL7	1	5	0	0	0	0	0	0	0	0	0	0	0	0	0	0	0	0	0	0	0	0	0.0105441	0	0	0	0	0	0	0.0148968	0	0	0	0	0	0	0	0	0	0	0	0	0	0	0
chr1	83949865	83952387	-	TTLL7	1	1	0	0	0	0	0	0	0	0	0	0	0	0	0	0	0	0	0.0104998	0	0	0	0	0	0	0	0	0	0	0	0	0	0	0	0	0	0	0	0	0	0	0	0	0	0
chr1	84185182	84173329	+	PRKACB	1	3	0	0	0	0	0	0	0	0	0	0	0	0	0	0	0	0	0	0	0	0	0	0	0	0	0	0	0	0	0	0.0104822	0	0	0.0300755	0	0	0	0	0	0	0	0	0	0
chr1	84185182	84179177	+	PRKACB	1	89	0	0.0367461	0.0467169	0	0	0	0	0.0339066	0.0646258	0	0.0225478	0.0274061	0.0195497	0.0290444	0	0	0	0.0562729	0.0415416	0	0.0105441	0	0	0	0	0.0769046	0.0423903	0.0297937	0.0152018	0	0.0204954	0.0127873	0	0.0395013	0.0282301	0	0.118138	0.0154646	0.0262614	0.0916481	0.0383604	0.0320241	0.015239
chr1	84197824	84175033	+	PRKACB	1	1	0	0	0	0	0	0	0	0	0	0	0	0	0	0	0	0	0	0	0	0	0	0	0	0	0	0	0	0	0	0.0104822	0	0	0	0	0	0	0	0	0	0	0	0	0
chr1	84197824	84179177	+	PRKACB	1	84	0	0.018373	0.0155723	0.0489018	0	0.017942	0	0.0226044	0.0430839	0	0	0.0411091	0.0195497	0.0290444	0	0	0.0104998	0.0281364	0.0207708	0.0177355	0.0210882	0.0177926	0.0103481	0.01967	0	0.0128174	0.0423903	0	0.0304037	0	0	0	0	0	0	0.0174408	0.0196896	0.0309292	0.0262614	0.017184	0.0191802	0.00800603	0
chr1	84197824	84182200	+	PRKACB	1	4	0	0	0	0	0	0	0	0	0	0	0	0	0	0	0	0	0	0	0	0	0	0	0	0	0	0	0	0	0	0	0.0102477	0	0	0	0	0	0.0196896	0	0	0	0	0	0
chr1	84197824	84196616	+	PRKACB	1	3	0	0	0	0	0	0	0	0	0	0	0	0	0	0	0	0	0	0	0	0	0.0105441	0	0	0	0	0	0	0	0	0.0104822	0	0	0	0	0	0	0	0	0	0	0	0	0
chr18	42004541	41970327	+	PIK3C3	1	1	0	0	0	0	0	0	0	0.0113022	0	0	0	0	0	0	0	0	0	0	0	0	0	0	0	0	0	0	0	0	0	0	0	0	0	0	0	0	0	0	0	0	0	0	0
chr18	42004541	41990459	+	PIK3C3	1	7	0	0	0	0	0	0	0	0	0	0	0	0	0	0	0.0143092	0	0	0.00937882	0	0	0	0	0	0	0	0	0	0	0	0	0	0	0	0	0	0	0.0393792	0	0	0	0	0	0
chr10	82979120	82973788	+	NRG3	1	3	0	0	0	0	0	0	0	0	0	0	0	0	0	0	0	0	0	0	0	0	0	0	0	0	0	0	0	0	0	0	0	0	0	0	0	0	0	0	0	0	0	0	0
chr18	42004541	41993270	+	PIK3C3	1	3	0	0	0	0	0	0	0	0	0	0	0	0	0	0	0	0.013398	0	0	0	0	0	0	0	0	0	0	0	0	0	0	0	0	0	0	0	0	0	0	0	0	0	0	0
chr18	42013596	41970327	+	PIK3C3	1	2	0	0	0	0	0	0.00897101	0	0	0	0	0	0	0	0	0	0	0	0	0	0	0	0	0	0	0	0	0	0	0	0	0	0	0	0	0	0	0	0	0	0	0	0	0
chr18	42013596	41990459	+	PIK3C3	1	17	0	0	0	0	0	0	0	0	0	0	0	0	0	0	0	0	0	0.00937882	0	0	0	0	0	0	0	0	0.00847806	0	0	0	0	0	0	0	0	0	0	0.00773231	0	0.005728	0	0	0
chr18	42020705	41993270	+	PIK3C3	1	3	0	0	0	0	0	0	0	0	0	0	0	0	0	0	0	0	0	0	0	0	0.0105441	0	0	0	0	0	0	0	0	0	0	0	0	0	0	0	0	0	0	0	0	0	0
chr1	84202805	84173329	+	PRKACB	1	1	0	0	0	0	0	0	0	0	0	0	0	0	0	0	0	0	0	0	0	0	0	0	0	0	0	0	0	0	0	0	0	0	0	0	0	0	0	0	0	0	0	0	0.015239
chr1	84202805	84175033	+	PRKACB	1	6	0	0	0	0	0	0	0	0	0	0	0.0225478	0	0	0	0	0	0	0	0	0.0177355	0	0	0	0	0	0	0	0	0	0	0	0	0	0.0197506	0	0	0	0	0	0	0	0	0
chr1	84202805	84179177	+	PRKACB	1	7	0	0	0.0155723	0.0244509	0	0	0	0	0	0	0	0	0	0	0	0	0	0	0	0	0.0105441	0	0	0	0	0.0128174	0	0	0	0	0	0	0	0	0	0	0	0	0	0	0	0	0
chr1	84202805	84184037	+	PRKACB	1	1	0	0	0	0	0	0	0	0	0	0	0	0	0	0	0	0	0	0	0	0	0	0	0	0	0	0	0	0.0148968	0	0	0	0	0	0	0	0	0	0	0	0	0	0	0
chr1	84202805	84196616	+	PRKACB	1	1	0	0	0	0	0	0	0	0	0	0	0	0	0	0	0	0	0	0	0	0	0	0	0	0	0	0	0	0	0	0	0	0	0	0	0	0	0	0	0	0	0	0.00800603	0
chr18	42029441	41993270	+	PIK3C3	1	4	0	0	0	0	0	0.00897101	0	0	0	0	0	0	0	0	0	0	0	0	0	0	0	0	0	0	0	0	0	0	0	0	0	0	0	0	0	0	0	0	0	0	0	0	0
chr10	836403	845055	-	LARP4B	1	4	0	0	0	0	0	0	0	0	0	0	0	0	0	0	0	0	0	0	0	0	0	0	0	0	0	0	0	0	0	0	0	0	0	0	0	0	0	0	0	0	0	0	0
chr18	42029441	41995890	+	PIK3C3	1	1	0	0	0	0	0	0	0	0	0	0	0	0	0	0	0	0	0	0	0	0	0	0	0	0	0	0	0	0	0	0	0	0	0	0	0	0	0.0196896	0	0	0	0	0	0
chr18	42029441	42015476	+	PIK3C3	1	15	0	0	0	0	0	0	0	0	0	0	0	0	0	0	0	0	0.0104998	0.00937882	0	0	0	0	0	0	0	0	0	0	0	0	0	0.0127873	0	0	0	0	0	0	0	0	0	0	0
chr18	42033957	41993270	+	PIK3C3	1	2	0	0	0	0	0	0	0	0	0	0	0	0	0	0	0	0	0	0	0	0	0	0	0	0	0	0	0	0	0	0	0	0	0	0	0	0	0	0.00773231	0	0	0	0	0
chr18	42033957	41995890	+	PIK3C3	0		0	0	0	0	0	0	0	0	0	0	0	0	0	0	0	0	0	0	0	0	0	0	0	0	0	0	0	0	0	0	0	0	0	0	0	0	0	0	0	0	0	0	0
chr18	42037820	41993270	+	PIK3C3	1	4	0	0	0	0	0	0	0	0.0113022	0	0	0	0	0	0	0	0	0	0	0	0	0.0105441	0	0	0	0	0.0128174	0	0	0	0	0	0	0	0	0	0	0	0	0	0	0	0	0
chr18	42037820	42015476	+	PIK3C3	1	3	0	0	0	0	0	0	0	0	0	0	0	0	0	0	0	0	0	0	0	0.0177355	0	0	0	0	0	0	0	0	0	0	0	0	0	0	0	0	0	0	0	0	0	0	0
chr18	42038850	41993270	+	PIK3C3	1	1	0	0	0	0	0	0	0	0	0	0	0	0	0	0	0	0	0	0	0	0	0	0	0	0	0	0	0	0	0	0	0	0	0	0	0	0	0	0	0	0	0	0	0
chr18	42038850	42020638	+	PIK3C3	1	2	0	0	0	0	0	0	0	0	0	0	0	0	0	0	0	0	0	0	0	0	0	0	0	0	0	0	0	0	0	0	0	0	0	0	0	0	0	0	0	0	0	0	0
chr18	42040741	42015476	+	PIK3C3	1	4	0	0	0	0	0	0	0	0	0	0	0	0	0	0	0	0	0	0	0	0	0	0	0	0	0	0.0128174	0	0	0	0	0	0	0	0	0	0	0	0	0	0	0	0	0
chr18	42040741	42027443	+	PIK3C3	1	6	0	0	0	0	0	0	0	0	0	0	0	0	0	0	0	0	0	0	0	0	0.0105441	0	0	0	0	0	0	0	0	0	0	0	0	0	0	0	0.0787584	0	0	0	0	0	0
chr10	84373815	84371014	+	CCSER2	1	61	0	0.0551191	0.0155723	0	0	0.026913	0.0104492	0.0339066	0	0.0162073	0	0.0411091	0	0.0290444	0	0	0.0209997	0.0187576	0	0.0177355	0.0210882	0	0	0	0	0.0128174	0.00847806	0	0.0152018	0.0104822	0	0.0127873	0	0	0	0.0174408	0	0	0	0	0.0191802	0	0
chr18	42040741	42033826	+	PIK3C3	1	2	0	0	0	0	0	0	0	0	0	0	0	0	0	0	0	0	0.0104998	0	0	0	0	0	0	0	0	0	0	0	0	0	0	0	0	0	0	0	0	0	0	0	0	0	0
chr18	42043817	42015476	+	PIK3C3	1	1	0	0	0	0	0	0	0	0	0	0	0	0	0	0	0	0.013398	0	0	0	0	0	0	0	0	0	0	0	0	0	0	0	0	0	0	0	0	0	0	0	0	0	0	0
chr18	42049605	42027443	+	PIK3C3	1	113	0.0132985	0.0918652	0.0778615	0.0244509	0.0502943	0.026913	0.0208984	0.056511	0.0646258	0.0162073	0.0676435	0.013703	0.0195497	0.0435666	0.0715462	0.013398	0.0524992	0.0468941	0.0623124	0.0354709	0.0738089	0.0177926	0.0620886	0.01967	0.0143901	0.0640871	0.0339122	0.0297937	0.0152018	0.0524108	0.0102477	0	0.0902266	0.0395013	0	0.0523225	0	0.0154646	0.0525228	0.017184	0.0383604	0.0400301	0
chr18	42049605	42029325	+	PIK3C3	1	4	0	0	0	0	0	0	0	0	0	0	0	0	0	0.0290444	0	0	0	0	0	0	0	0	0	0	0	0	0	0	0	0	0	0.051149	0	0	0	0	0	0	0	0	0	0	0
chr18	42049605	42033826	+	PIK3C3	1	5	0	0	0	0	0	0	0	0	0	0	0	0	0	0	0	0	0	0	0	0	0	0	0	0	0	0	0	0	0	0	0	0	0	0	0	0	0	0	0	0	0.0383604	0	0
chr18	42049605	42037692	+	PIK3C3	1	34	0	0.018373	0.0155723	0	0	0	0.0104492	0.0226044	0	0	0	0	0	0.0435666	0.0143092	0	0	0.0187576	0	0.0177355	0.0421765	0	0	0.0786801	0	0	0	0	0	0	0.0307431	0.0127873	0	0.0197506	0	0	0	0	0	0	0	0	0.015239
chr18	42049605	42038781	+	PIK3C3	1	6	0	0	0	0	0	0	0	0	0	0.0162073	0	0	0	0	0	0	0	0	0	0	0	0	0	0	0	0.0128174	0	0	0	0	0	0	0	0	0	0	0	0	0	0	0	0	0
chr18	42049605	42043733	+	PIK3C3	1	1	0	0	0	0	0	0	0	0	0	0	0	0	0	0	0	0	0	0	0	0	0	0	0	0	0	0	0	0	0	0.0314465	0	0	0	0	0	0	0	0	0	0	0	0	0
chr18	42058051	41993270	+	PIK3C3	1	1	0	0	0	0	0	0.00897101	0	0	0	0	0	0	0	0	0	0	0	0	0	0	0	0	0	0	0	0	0	0	0	0	0	0	0	0	0	0	0	0	0	0	0	0	0
chr18	42058051	42037692	+	PIK3C3	1	3	0	0	0	0	0	0	0	0	0	0.0162073	0	0	0	0	0	0	0	0	0	0	0	0	0	0	0	0	0	0	0	0	0	0	0	0	0	0	0	0	0	0	0	0	0
chr10	84425893	84417771	+	CCSER2	1	109	0.0664927	0.018373	0.0311446	0.0733527	0	0.0538261	0.0313477	0.0226044	0.0430839	0.0162073	0	0.0274061	0.0390993	0.0580888	0.0286185	0.0803879	0.0104998	0.0375153	0	0.106413	0	0.0355851	0.0310443	0.0590101	0.100731	0.0128174	0.0169561	0.0744842	0.0152018	0.0419287	0.0102477	0.0127873	0	0.0395013	0.0282301	0.0174408	0	0.0154646	0.0656535	0	0.0191802	0.0400301	0.030478
chr18	42058051	42043733	+	PIK3C3	1	2	0	0	0	0	0	0	0	0	0	0	0	0	0	0	0	0	0	0	0	0	0	0	0	0	0	0	0	0	0	0	0	0	0	0	0	0	0	0	0	0	0	0	0
chr18	42067513	42027443	+	PIK3C3	1	3	0	0	0	0	0	0	0	0	0	0	0	0	0	0	0	0	0	0	0	0	0	0	0	0	0	0	0	0	0	0	0	0	0	0	0	0	0	0	0	0	0	0.00800603	0
chr18	42067513	42033826	+	PIK3C3	1	1	0	0	0	0	0	0	0	0	0	0	0	0	0	0	0	0	0	0	0	0	0	0	0	0	0	0	0	0	0	0	0	0	0	0	0	0	0	0	0	0.005728	0	0	0
chr18	42067513	42040677	+	PIK3C3	1	3	0	0	0	0	0	0	0	0	0	0	0	0	0	0	0	0	0	0	0	0	0.0210882	0	0.0103481	0	0	0	0	0	0	0	0	0	0	0	0	0	0	0	0	0	0	0	0
chr18	42067513	42043733	+	PIK3C3	1	2	0	0	0	0	0	0	0	0	0	0	0	0	0	0	0	0	0	0	0	0	0	0	0	0	0	0	0	0	0	0	0	0	0	0	0	0	0	0.00773231	0	0	0	0	0
chr18	42067513	42057883	+	PIK3C3	1	1	0	0	0	0	0	0	0	0	0	0	0	0	0	0	0	0	0	0	0	0	0	0	0	0	0	0	0	0	0	0	0	0	0	0	0	0	0	0	0	0	0	0	0
chr1	84214317	84179177	+	PRKACB	1	109	0.0132985	0.0367461	0	0.0489018	0	0.017942	0.0104492	0.0113022	0.0430839	0	0.0676435	0.013703	0.0195497	0.0145222	0.0143092	0.013398	0.0209997	0.0375153	0.0415416	0.0354709	0	0	0.0310443	0.01967	0.0143901	0.0640871	0.0423903	0.0148968	0.0304037	0.0209643	0.0102477	0.0383618	0.0601511	0.0790026	0.0564602	0.0174408	0.0393792	0.0309292	0	0.034368	0	0.0160121	0.015239
chr18	42226107	42212364	+	LINC00907	1	1	0	0	0	0	0	0	0	0	0	0	0	0	0	0	0	0	0	0	0	0	0	0	0	0	0	0	0	0	0	0	0	0	0	0	0	0	0	0.00773231	0	0	0	0	0
chr1	8422727	8541318	-	RERE	1	8	0	0.018373	0	0	0	0	0	0	0	0	0	0	0	0	0	0	0	0	0	0	0	0	0	0	0	0.0128174	0	0	0	0	0	0	0	0	0.0282301	0	0	0.00773231	0	0	0	0	0
chr1	8422727	8557523	-	RERE	1	3	0	0	0	0	0	0	0	0	0	0	0	0	0	0	0	0	0	0	0	0	0	0	0	0	0	0	0	0	0	0	0	0.0255745	0	0	0	0	0	0	0	0	0	0	0
chr10	84438707	84417771	+	CCSER2	1	7	0	0	0	0	0	0	0	0	0	0	0	0	0	0.0145222	0	0	0	0.00937882	0	0.0177355	0	0	0.0103481	0	0	0	0	0	0	0	0	0	0	0	0	0	0	0	0	0	0	0	0
chr1	8422727	8614686	-	RERE	1	7	0	0.018373	0.0155723	0	0	0	0	0	0	0	0	0	0	0	0	0	0	0	0.0415416	0	0	0	0	0	0	0	0	0	0	0	0	0	0	0.0197506	0	0	0	0	0	0	0	0	0
chr18	42454989	42453932	+	LINC00907	1	3	0	0	0	0	0	0	0	0	0.0215419	0	0	0	0	0	0	0	0	0	0	0.0177355	0	0	0	0	0	0	0	0	0	0	0	0	0	0	0	0	0	0	0	0.005728	0	0	0
chr18	42920697	42974147	-	RIT2	1	1	0	0	0	0	0	0	0	0	0	0	0	0	0	0	0.0143092	0	0	0	0	0	0	0	0	0	0	0	0	0	0	0	0	0	0	0	0	0	0	0	0	0	0	0	0
chr18	42923572	42974147	-	RIT2	1	2	0	0	0	0	0	0	0	0	0	0	0	0	0	0	0	0	0	0	0	0	0	0	0	0	0	0	0	0	0	0	0	0	0	0	0	0	0	0	0	0	0	0	0
chr18	44701832	44701175	+	SETBP1	1	43	0	0.018373	0	0	0	0.00897101	0.0104492	0	0	0	0	0.0274061	0	0.0145222	0	0	0	0.0187576	0	0	0	0	0	0	0	0	0	0	0.0152018	0	0	0.0127873	0	0	0	0.0174408	0	0.00773231	0	0.011456	0.0191802	0.0160121	0.015239
chr18	44869283	44701175	+	SETBP1	1	12	0	0	0.0155723	0	0	0.00897101	0	0.0113022	0	0	0	0	0	0	0	0	0	0	0	0	0	0	0	0	0	0	0	0	0	0	0.0102477	0	0.0300755	0	0	0	0	0	0	0	0	0	0
chr18	44953340	44869230	+	SETBP1	1	3	0	0	0	0	0	0	0	0	0	0	0	0	0	0	0	0	0	0	0	0	0	0	0	0	0	0	0	0	0	0	0	0	0	0	0	0	0	0	0	0	0	0	0
chr18	44953340	44949881	+	SETBP1	1	46	0	0	0	0.0244509	0	0	0.0208984	0.0226044	0	0	0	0	0	0	0	0	0	0.00937882	0.0207708	0	0	0.0177926	0.0206962	0	0.0143901	0	0	0	0	0.0104822	0.0204954	0.0255745	0.0902266	0.0197506	0	0	0	0	0.0262614	0	0	0.0160121	0.015239
chr18	45739662	45739163	+	SLC14A1	1	5	0	0	0	0	0	0	0	0	0	0	0	0	0.0195497	0	0	0	0	0	0.0207708	0	0	0	0	0	0	0	0.00847806	0	0	0	0	0	0	0	0	0	0	0.00773231	0	0	0	0	0
chr18	45899404	45910742	-	EPG5	1	1	0	0	0	0	0	0	0	0	0	0	0	0	0	0	0	0	0	0.00937882	0	0	0	0	0	0	0	0	0	0	0	0	0	0	0	0	0	0	0	0	0	0	0	0	0
chr10	84438707	84425731	+	CCSER2	1	1	0	0	0	0	0	0	0	0	0	0	0	0	0	0	0	0	0.0104998	0	0	0	0	0	0	0	0	0	0	0	0	0	0	0	0	0	0	0	0	0	0	0	0	0	0
chr18	45943161	45951238	-	EPG5	1	1	0	0	0	0	0	0	0	0	0	0	0	0	0	0	0	0	0	0	0	0	0	0	0	0	0	0.0128174	0	0	0	0	0	0	0	0	0	0	0	0	0	0	0	0	0
chr18	46088109	46095131	-	ATP5A1	1	1	0	0	0	0	0	0	0	0	0	0	0	0	0	0.0145222	0	0	0	0	0	0	0	0	0	0	0	0	0	0	0	0	0	0	0	0	0	0	0	0	0	0	0	0	0
chr18	46123364	46122467	+	HAUS1	1	8	0	0	0	0	0	0	0	0	0	0	0	0.013703	0	0	0	0	0	0	0	0	0.0105441	0	0	0	0	0	0	0.0297937	0	0	0	0	0	0	0	0	0	0.0231969	0	0	0	0	0
chr18	46435396	46433190	+	RNF165	1	1	0	0	0	0	0	0	0	0	0	0	0	0	0	0	0	0	0	0	0	0	0	0	0	0	0	0	0.00847806	0	0	0	0	0	0	0	0	0	0	0	0	0	0	0	0
chr1	84655832	84671308	-	SSX2IP	1	95	0.0132985	0.018373	0.0467169	0.0244509	0.0502943	0.026913	0.0208984	0.0113022	0	0	0	0.013703	0	0.101655	0.0429277	0	0.0419994	0	0	0	0.0316324	0.0177926	0.0103481	0.0786801	0.0287802	0.0128174	0.00847806	0.0446905	0.0152018	0.0104822	0.0204954	0.115085	0.0902266	0.0395013	0.0846902	0	0	0.0231969	0.0393921	0.040096	0	0.0240181	0.015239
chr1	84656348	84666232	-	SSX2IP	1	1	0	0	0	0	0	0	0	0	0	0	0	0	0	0	0	0	0	0.00937882	0	0	0	0	0	0	0	0	0	0	0	0	0	0	0	0	0	0	0	0	0	0	0	0	0
chr1	8465925	8497529	-	RERE	1	5	0	0	0	0	0	0	0	0	0	0	0	0	0	0	0	0	0	0	0	0	0	0	0	0	0	0	0	0	0	0	0	0	0	0	0	0	0	0	0	0.005728	0	0	0
[truncated: 51,428 more rows]
[truncated: 159 more columns]

## Sheet: 36,624 circRNAs in cortext
Chr	Donor	Acceptor	Strand	Host gene symbol	The identified DE-circRNA? (yes:1)	# of the 134 cortex samples that were observed to have this circRNA	circBase or CIRCpediaV2 (yes:1)	circBase (yes:1)	circBase_brain (yes:1)	circBase_mouse (yes:1)	circBase_mouse_brain (yes:1)	CIRCpediaV2 (yes:1)	CIRCpediaV2_brain (yes:1)	CIRCpediaV2_mouse (yes:1)	CIRCpedia_mouse_brain (yes:1)
chr1	26732792	26729651	+	ARID1A	1	94	1	1	1			1	1	1	1
chr10	100190869	100205199	-	CHUK		1	1					1
chr10	100926019	100915999	+	SLF2		25	1					1	1	1
chr10	105147796	105105397	+	SORCS3		3	1	1	1			1	1	1	1
chr10	68886618	68884260	+	STOX1		3	1	1	1			1	1
chr16	74477396	74480394	-	GLG1		5	1	1	1			1	1
chr16	74496441	74508925	-	GLG1		6	1	1	1			1	1	1	1
chr16	74644362	74661451	-	RFWD3		1	1	1				1	1
chr16	74915870	74916259	-	WDR59		12	1	1	1			1	1
chr16	74923926	74951543	-	WDR59		1	1	1	1			1	1
chr16	74938150	74951543	-	WDR59		8	1	1	1			1	1
chr16	74938150	74956610	-	WDR59		2	1	1	1			1	1
chr16	74948519	74956610	-	WDR59		2	1	1				1	1
chr16	7518389	7052057	+	RBFOX1		2	0
chr16	7518389	7518147	+	RBFOX1		29	1	1	1	1	1	1	1	1	1
chr10	68892773	68881958	+	STOX1		19	1	1	1			1	1
chr16	75234889	75235986	-	BCAR1		1	1	1				1
chr16	75391380	75414695	-	CFDP1		35	1	1	1
chr16	75395090	75414695	-	CFDP1		7	1	1	1	1	1	1	1	1	1
chr16	75411825	75414695	-	CFDP1		3	1	1	1			1	1	1	1
chr16	75412535	75414695	-	CFDP1		2	1					1		1
chr16	75603085	75608988	-	ADAT1		1	1	1	1			1	1
chr16	75608224	75608988	-	ADAT1		3	1	1	1			1	1
chr16	75640184	75641723	-	KARS		3	1	1	1			1	1
chr16	7595641	7579777	+	RBFOX1		1	0
chr16	7597431	7579777	+	RBFOX1		6	1	1	1			1	1	1	1
chr10	68943257	68936936	+	DDX50		23	1	1	1			1	1
chr16	7607338	7518147	+	RBFOX1		1	1	1	1			1	1	1	1
chr16	7607338	7579777	+	RBFOX1	1	111	1	1	1			1	1	1
chr16	7607338	7579780	+	RBFOX1	1	111	1	1	1			1	1
chr16	7607338	7587247	+	RBFOX1		4	1	1	1	1		1	1	1	1
chr16	7607338	7595549	+	RBFOX1		6	1	1	1	1		1	1	1	1
chr16	7630683	7579777	+	RBFOX1		3	1	1	1			1	1
chr16	76449858	76448012	+	CNTNAP4		6	1	1	1			1	1
chr16	76452769	76448012	+	CNTNAP4		1	1	1	1	1	1	1	1	1	1
chr16	76462105	76448012	+	CNTNAP4		3	1	1	1			1	1
chr16	76467523	76448012	+	CNTNAP4		7	1	1	1			1	1	1	1
chr10	68960249	68959806	+	DDX21		34	1	1	1			1	1
chr16	76495066	76452508	+	CNTNAP4		2	1	1	1			1	1
chr16	76498694	76475939	+	CNTNAP4		2	1	1	1			1	1
chr16	76522257	76498567	+	CNTNAP4		2	1	1	1			1	1
chr16	7653947	7579777	+	RBFOX1		11	1	1	1	1	1	1	1
chr16	7653947	7595549	+	RBFOX1		2	1					1	1
chr16	7653947	7597371	+	RBFOX1		6	1	1	1			1	1	1
chr16	76540790	76535545	+	CNTNAP4		1	1	1	1			1	1
chr16	7676838	7579777	+	RBFOX1		1	1	1	1			1	1
chr16	7676838	7587247	+	RBFOX1		6	1					1	1	1
chr10	68962157	68959806	+	DDX21		1	1	1	1			1	1
chr16	7676838	7595549	+	RBFOX1		2	0							1
chr16	7693367	7587247	+	RBFOX1		1	1					1	1	1
chr16	7693367	7595549	+	RBFOX1		3	1					1	1
chr16	7693367	7653815	+	RBFOX1		2	1	1	1	1	1	1	1	1	1
chr16	7709131	7579777	+	RBFOX1		3	1					1	1
chr16	7709131	7587247	+	RBFOX1		1	0
chr16	77319849	77326038	-	ADAMTS18		1	1	1
chr16	77319849	77335904	-	ADAMTS18		1	1					1		1
chr16	77353733	77367723	-	ADAMTS18		3	1	1	1			1	1	1	1
chr16	77825461	77816921	+	VAT1L		9	1	1	1			1	1	1	1
chr10	68963469	68959806	+	DDX21		2	1					1	1
chr16	78164289	78108423	+	WWOX		2	1	1	1	1	1	1	1	1
chr16	80620763	80685129	-	CDYL2		1	1					1
chr16	80684538	80685129	-	CDYL2	1	133	1	1	1	1	1	1	1	1	1
chr16	81365478	81351583	+	GAN		10	1	1	1			1	1
chr16	81365478	81354405	+	GAN		26	1	1	1			1	1
chr16	81365478	81356785	+	GAN		2	1	1	1			1	1
chr16	81365478	81362499	+	GAN		3	1	1	1			1	1
chr16	81664349	81652203	+	CMIP		1	1					1	1
chr1	6825210	6806983	+	CAMTA1		5	1	1	1			1	1
chr16	83032218	82858362	+	CDH13		1	1					1	1	1	1
chr10	68967203	68959806	+	DDX21		2	1					1	1
chr16	83032218	83023013	+	CDH13		2	1	1	1
chr16	83032218	83032010	+	CDH13		16	1	1	1	1	1	1	1	1
chr16	83217497	82858362	+	CDH13		1	0
chr16	83678461	83670790	+	CDH13		1	1	1		1	1	1	1	1	1
chr16	83912367	83906987	+	MLYCD		46	1	1	1			1	1	1
chr16	84099053	84102107	-	MBTPS1		2	1	1	1			1	1
chr16	84150342	84149007	+	DNAAF1		3	1	1	1			1	1
chr16	84170356	84169859	+	DNAAF1		1	0
chr16	84745673	84733053	+	USP10		1	1					1	1
chr16	84838735	84838422	+	CRISPLD2		1	1	1	1			1	1
chr10	68967203	68963291	+	DDX21		12	1	1	1			1	1
chr16	85087166	85086644	+	KIAA0513		1	1	1
chr16	85634132	85633914	+	GSE1		68	1	1	1	1	1	1	1	1	1
chr1	6871840	6820181	+	CAMTA1		1	1					1		1
chr16	87342877	87347250	-	FBXO31		6	1	1	1			1	1
chr16	87342877	87360366	-	FBXO31		2	1	1	1	1	1	1	1	1	1
chr16	87417460	87418901	-	ZCCHC14		6	1	1	1			1	1
chr16	87417460	87423881	-	ZCCHC14		1	0
chr16	87419783	87420716	-	ZCCHC14		6	1	1	1			1	1
chr16	87419783	87433201	-	ZCCHC14		1	1					1	1
chr16	8750539	8746001	+	ABAT		5	1	1	1			1	1
chr10	68970350	68963291	+	DDX21		2	1	1	1			1	1
chr16	8757806	8746001	+	ABAT		56	1	1	1	1	1	1	1	1	1
chr16	8768973	8766208	+	ABAT		4	1	1	1			1	1
chr16	87726765	87730644	-	KLHDC4		1	1	1	1			1	1	1	1
chr16	87748673	87762040	-	KLHDC4		10	1	1	1			1	1
chr16	879570	881505	-	LMF1		5	1	1	1
chr16	879570	893072	-	LMF1		1	1	1	1			1	1
chr16	879570	911079	-	LMF1		4	1	1	1			1	1
chr16	87984259	87975048	+	BANP		33	1	1	1	1	1	1	1	1	1
chr16	88006265	87975048	+	BANP		4	1	1	1			1	1
chr16	88006265	87981036	+	BANP		2	1	1	1			1	1
chr10	69187756	69185987	+	SUPV3L1		3	1	1	1			1	1
chr16	88038011	88027483	+	BANP		1	1	1				1	1	1
chr16	8806407	8801799	+	PMM2		1	1	1	1			1	1
chr16	88599948	88586600	+	ZC3H18		2	1					1	1
chr16	88611536	88586600	+	ZC3H18		30	1	1	1			1	1	1
chr16	88611536	88598178	+	ZC3H18		12	1	1	1			1	1	1
chr16	88611536	88599791	+	ZC3H18		1	1	1	1			1	1
chr16	88611536	88608934	+	ZC3H18		35	1	1	1			1	1	1	1
chr16	88611536	88611268	+	ZC3H18		6	1					1	1
chr16	88628854	88627622	+	ZC3H18		2	1	1	1			1	1
chr16	8899604	8902482	-	USP7		1	0
chr10	105158994	105105397	+	SORCS3		1	0
chr10	69191766	69182520	+	SUPV3L1		1	0
chr16	8905187	8910827	-	USP7		1	1	1	1	1	1	1	1	1	1
chr16	8908341	8917156	-	USP7		1	1	1				1	1
chr16	8915254	8917156	-	USP7		15	1	1	1			1	1
chr16	8929369	8930397	-	USP7		2	1	1	1			1	1
chr16	893007	954666	-	LMF1		1	1					1
chr16	89305206	89305344	-	ANKRD11		1	1	1	1			1	1
chr16	89305206	89313589	-	ANKRD11		6	1					1	1
chr16	89305206	89317075	-	ANKRD11		38	1	1	1	1	1	1	1	1	1
chr16	89305206	89317078	-	ANKRD11		38	1	1	1			1	1
chr16	89532636	89524006	+	SPG7		1	1	1	1			1	1	1
chr10	69191766	69185987	+	SUPV3L1		21	1	1	1			1	1	1	1
chr16	89548113	89544648	+	SPG7		2	1	1	1			1	1
chr16	89554563	89552979	+	SPG7		1	1					1
chr16	89734038	89727279	+	ZNF276		1	1					1
chr16	89737905	89733482	+	ZNF276		16	1	1	1	1	1	1	1	1	1
chr16	89885966	89883351	+	TCF25		3	1	1	1			1	1
chr16	89887717	89883351	+	TCF25		1	1	1				1		1
chr16	89900794	89892193	+	TCF25		11	1	1	1			1	1
chr16	89900794	89895038	+	TCF25		5	1	1	1			1	1
chr16	89900794	89895990	+	TCF25		2	1	1	1			1	1
chr16	89904205	89892193	+	TCF25		1	1	1				1	1
chr10	69195265	69185987	+	SUPV3L1		13	1	1	1			1	1
chr16	90032924	90031176	+	GAS8		2	1	1	1			1	1
chr16	90032924	90031190	+	GAS8		3	1	1	1			1	1
chr16	910931	954666	-	LMF1		3	1	1	1			1	1	1
chr16	933991	954666	-	LMF1		1	1					1
chr16	934190	954666	-	LMF1		6	1	1	1			1	1
chr16	954357	954666	-	LMF1		4	1	1	1			1	1
chr16	9768851	9769089	-	GRIN2A		1	0
chr1	69792160	69678381	+	LRRC7		9	1					1	1	1	1
chr1	69792160	69716142	+	LRRC7		3	1	1	1			1	1	1
chr1	69792160	69760191	+	LRRC7		7	1	1	1			1	1	1	1
chr10	69203043	69198372	+	SUPV3L1		24	1	1	1			1	1
chr16	9798277	9841104	-	GRIN2A		21	1					1	1	1	1
chr16	9798277	9849961	-	GRIN2A		8	0							1
chr16	98145	100509	-	NPRL3		17	1	1	1			1	1
chr16	9822264	9841104	-	GRIN2A		9	0			1	1			1	1
chr16	9822264	9849961	-	GRIN2A		12	1			1	1	1	1	1	1
chr1	69825826	69678381	+	LRRC7		2	0							1
chr1	69825826	69760191	+	LRRC7		1	1					1	1	1
chr1	69838283	69678381	+	LRRC7		9	1					1	1	1	1
chr1	69838283	69760191	+	LRRC7		10	1	1	1			1	1	1	1
chr1	69838283	69792043	+	LRRC7		2	1	1	1			1	1	1	1
chr10	69380095	69376934	+	HK1		6	1	1	1			1	1
chr1	69838283	69825748	+	LRRC7		4	1	1	1			1	1	1	1
chr1	69838283	69834780	+	LRRC7		2	1	1	1			1	1
chr16	9849756	9891100	-	GRIN2A		1	0							1	1
chr1	69931570	69760191	+	LRRC7		2	1					1	1
chr1	69931570	69825748	+	LRRC7		1	1					1	1
chr1	69994633	69931507	+	LRRC7		20	1	1	1			1	1	1
chr1	69994633	69980379	+	LRRC7		6	1	1	1			1	1	1	1
chr1	70013089	69994561	+	LRRC7		1	1	1	1			1	1
chr1	70076298	70053026	+	LRRC7		7	1	1	1			1	1
chr1	70089819	70053026	+	LRRC7	1	93	1	1	1			1	1	1	1
chr10	69485215	69483691	+	TSPAN15		3	1	1	1			1	1
chr1	70107826	70043954	+	LRRC7		2	1	1	1			1	1	1	1
chr1	70107826	70053026	+	LRRC7		67	1	1	1			1	1	1	1
chr1	70107826	70076077	+	LRRC7		41	1	1	1			1	1	1	1
chr1	70121870	70053026	+	LRRC7		22	1	1	1
chr1	70121870	70076077	+	LRRC7		24	1	1	1
chr1	70151128	70175982	-	LRRC40		1	1	1	1			1	1
chr1	70173465	70189273	-	LRRC40		8	1	1	1			1	1
chr1	70181086	70189273	-	LRRC40		3	1	1	1			1	1
chr1	70184785	70189273	-	LRRC40		2	1	1	1			1	1
chr1	70270856	70276844	-	ANKRD13C		19	1	1	1			1	1	1
chr10	69495689	69483691	+	TSPAN15		3	1	1	1			1
chr1	70270856	70300908	-	ANKRD13C		7	1	1	1			1	1	1
chr1	70270856	70306290	-	ANKRD13C		3	1	1	1			1	1
chr1	70270856	70315566	-	ANKRD13C	1	76	1	1	1			1	1
chr1	70270856	70324957	-	ANKRD13C		2	1	1	1			1	1
chr1	70274720	70296261	-	ANKRD13C		1	1	1	1			1	1	1	1
chr1	70274720	70300908	-	ANKRD13C		5	1	1	1			1	1
chr1	70274720	70306290	-	ANKRD13C		7	1	1	1			1	1
chr1	70274720	70315566	-	ANKRD13C		24	1	1	1			1	1
chr1	70274720	70324957	-	ANKRD13C		3	1	1	1			1
chr1	70274720	70336099	-	ANKRD13C		1	0
chr10	69498396	69483691	+	TSPAN15		15	1	1	1			1	1
chr1	70276765	70300908	-	ANKRD13C		2	1					1
chr1	70292388	70300908	-	ANKRD13C		4	1	1	1			1	1	1	1
chr1	70292388	70306290	-	ANKRD13C		15	1	1	1			1	1
chr1	70292388	70313790	-	ANKRD13C		14	1	1	1			1	1
chr1	70292388	70315566	-	ANKRD13C		64	1	1	1			1	1
chr1	70292388	70324957	-	ANKRD13C		4	1	1	1			1	1
chr1	70292388	70336099	-	ANKRD13C		3	1					1
chr1	70296130	70313790	-	ANKRD13C		3	1	1	1			1	1
chr1	70296130	70315566	-	ANKRD13C		22	1	1	1			1	1
chr1	70296130	70324957	-	ANKRD13C		4	1	1	1			1	1
chr10	69504485	69483691	+	TSPAN15		1	1					1
chr1	70300764	70315566	-	ANKRD13C		48	1	1	1			1	1
chr1	70300764	70324957	-	ANKRD13C		1	1	1	1			1	1
chr1	70313745	70336099	-	ANKRD13C		1	0
chr1	70424416	70417937	+	CTH		1	1	1	1			1	1
chr17	1050050	1067242	-	ABR		1	0
chr17	1050050	1073677	-	ABR		5	1	1	1			1	1
chr17	1050050	1100735	-	ABR		7	1	1	1			1	1
chr17	1073625	1100735	-	ABR		1	1					1
chr17	1079330	1091850	-	ABR		1	0
chr17	1079330	1100735	-	ABR		1	1	1	1			1		1
chr10	70091954	70090060	+	H2AFY2		2	1	1	1			1	1
chr17	1083520	1100735	-	ABR		21	1	1	1			1	1
chr17	1091665	1091850	-	ABR		1	1					1
chr17	1091665	1100735	-	ABR		3	1	1	1			1	1	1
chr17	1091665	1125367	-	ABR		1	1					1		1
chr17	11669794	11669064	+	DNAH9		1	1	1	1					1	1
chr17	11680889	11651069	+	DNAH9		1	1	1	1
chr17	12081530	12054889	+	MAP2K4		1	1	1				1	1	1	1
chr17	12095694	12054889	+	MAP2K4		14	1	1	1			1	1	1	1
chr17	12095694	12081356	+	MAP2K4		2	1	1	1			1	1	1
chr17	12113360	12054889	+	MAP2K4		34	1	1				1	1	1
chr10	105201253	105167258	+	SORCS3		11	1	1	1			1	1
chr10	70095753	70090060	+	H2AFY2		7	1	1	1			1	1
chr17	12113360	12081356	+	MAP2K4		42	1	1	1			1	1	1	1
chr17	12113360	12095575	+	MAP2K4		1	1	1	1			1	1	1
chr17	12129287	12054889	+	MAP2K4		11	1	1				1	1
chr17	12129287	12081356	+	MAP2K4		3	1					1
chr17	12919831	12894940	+	ARHGAP44		24	1	1	1			1	1
chr17	12919831	12896407	+	ARHGAP44		3	0
chr17	12919831	12908897	+	ARHGAP44		18	1	1	1			1	1
chr17	12929046	12894940	+	ARHGAP44		16	1	1	1			1	1	1	1
chr17	12929046	12896407	+	ARHGAP44		5	1					1	1
chr17	12929046	12908897	+	ARHGAP44		62	1	1	1			1	1	1	1
chr10	70114145	70124097	-	AIFM2		2	1	1	1
chr17	12929046	12915900	+	ARHGAP44		5	1	1				1	1
chr17	12944196	12941056	+	ARHGAP44		5	1	1	1			1	1	1	1
chr17	12944196	12943588	+	ARHGAP44		2	1	1	1			1	1
chr17	12952581	12941056	+	ARHGAP44		1	1					1	1	1
chr17	12958897	12941056	+	ARHGAP44		2	1	1	1			1	1	1	1
chr17	1361092	1362008	-	YWHAE		1	1	1				1	1	1	1
chr17	14077056	14074323	+	COX10		3	1	1	1			1	1	1	1
chr17	1480527	1480885	-	MYO1C		1	1	1	1			1	1
chr17	1521579	1558559	-	PITPNA		1	1	1				1
chr17	15327992	15331614	-	TEKT3		5	1	1	1			1	1
chr10	70209205	70218817	-	PPA1		2	1	1	1			1	1
chr17	1534099	1538952	-	PITPNA		2	1	1	1			1	1
chr17	1534099	1541640	-	PITPNA		1	1	1				1
chr17	1534099	1548387	-	PITPNA		4	1	1	1			1	1	1	1
chr17	1534099	1558559	-	PITPNA		8	1	1				1
chr17	1538869	1553149	-	PITPNA		2	1	1				1	1
chr17	1541566	1553149	-	PITPNA		2	1					1	1
chr17	1543020	1558559	-	PITPNA		2	1	1
chr17	1548296	1553149	-	PITPNA		20	1	1	1			1	1
chr1	71592817	71611146	-	NEGR1		1	1	1	1			1	1
chr17	15978044	15993778	-	ZSWIM7		1	1	1
chr10	70209205	70230399	-	PPA1		1	0
chr17	16006568	16001915	+	TTC19		50	1	1	1	1	1	1	1	1	1
chr17	16034765	16039654	-	NCOR1		4	1	1	1			1	1
chr17	16034765	16040494	-	NCOR1		4	1	1	1			1	1
chr17	16034765	16048988	-	NCOR1		3	1	1	1			1	1
chr17	16064870	16068121	-	NCOR1		2	1	1	1			1	1
chr17	16071409	16073569	-	NCOR1		2	1	1	1			1	1
chr17	16071409	16075702	-	NCOR1		2	1	1	1			1	1
chr17	16098367	16101805	-	NCOR1		3	1	1	1			1	1
chr17	16101250	16101757	-	NCOR1		1	1	1	1			1	1
chr17	16101250	16101805	-	NCOR1		19	1	1	1			1	1
chr10	70217812	70218817	-	PPA1		2	1	1	1			1	1
chr17	16108786	16146548	-	NCOR1		1	1	1				1	1	1	1
chr17	16117888	16139186	-	NCOR1		1	1					1
chr17	16117888	16149517	-	NCOR1		1	1					1
chr17	16126082	16146548	-	NCOR1		10	1	1	1			1	1
chr17	16137311	16143696	-	NCOR1		1	1					1		1	1
chr17	16137311	16146548	-	NCOR1		10	1	1	1			1	1
chr17	16137311	16153395	-	NCOR1		2	1	1				1	1
chr17	16139008	16143696	-	NCOR1		6	1	1	1			1	1
chr17	16143606	16153395	-	NCOR1		1	1	1	1			1	1
chr17	16326905	16299888	+	PIGL		1	0
chr10	70851210	70844473	+	SGPL1		1	1	1	1			1	1
chr17	16326905	16313547	+	PIGL		1	0
chr17	16326905	16325800	+	PIGL		4	1	1	1
chr17	1636709	1637062	-	SCARF1		10	1	1	1			1	1
chr1	71698008	71935311	-	NEGR1		7	1					1	1	1	1
chr17	17214985	17219209	-	FLCN		6	1	1	1			1	1
chr17	17214985	17222661	-	FLCN		1	1					1	1
chr17	17254859	17264981	-	COPS3		1	1	1	1			1	1
chr17	17261966	17264981	-	COPS3		1	1	1	1			1	1
chr1	71776172	71935311	-	NEGR1		6	1					1	1	1	1
chr17	17861476	17869473	-	TOM1L2		1	1	1	1	1	1	1	1	1
chr10	70859499	70844473	+	SGPL1	1	80	1	1	1			1	1
chr17	17866296	17869473	-	TOM1L2		2	1	1	1			1	1
chr17	17884634	17893810	-	TOM1L2		1	1	1				1	1
chr17	1799857	1801024	-	SMYD4		1	1	1	1			1	1	1	1
chr17	18021123	18026416	-	ATPAF2		34	1	1	1			1	1
chr17	18021123	18028659	-	ATPAF2		3	1	1	1			1	1	1
chr17	18024624	18028659	-	ATPAF2		2	1	1	1			1	1
chr17	18292645	18306966	-	TOP3A		2	1	1	1			1	1
chr17	18294703	18306966	-	TOP3A		2	1	1	1			1	1
chr17	18294703	18307570	-	TOP3A		1	0
chr17	18305112	18306966	-	TOP3A		2	1	1	1			1	1
chr10	70868433	70844473	+	SGPL1		14	1	1	1			1	1
chr17	1844686	1842803	+	RPA1		4	1	1	1			1	1
chr17	1853189	1842803	+	RPA1		17	1	1	1			1	1	1	1
chr17	18705164	18704619	+	TRIM16L		2	1	1	1			1	1
chr17	1880691	1875661	+	RPA1		1	1	1	1			1	1
chr17	1883944	1875661	+	RPA1		2	1	1				1	1
chr17	18865952	18865469	+	PRPSAP2		10	1	1	1			1	1
chr17	18867334	18865469	+	PRPSAP2		10	1	1	1			1	1
chr17	18872649	18865469	+	PRPSAP2		3	1	1	1			1	1
chr17	18877870	18865469	+	PRPSAP2		14	1	1	1			1	1
chr17	18877870	18865802	+	PRPSAP2		2	1	1	1			1
chr10	70871986	70844473	+	SGPL1		4	1					1
chr17	18877870	18867282	+	PRPSAP2		17	1	1	1			1	1
chr17	18877870	18872583	+	PRPSAP2		2	1	1	1			1	1	1
chr17	18889877	18865469	+	PRPSAP2		10	1	1	1			1	1
chr17	18889877	18867282	+	PRPSAP2		1	1	1	1			1	1
chr17	18889877	18872583	+	PRPSAP2		1	1					1		1
chr17	18911251	18865469	+	PRPSAP2		14	1	1	1			1	1	1
chr17	18911251	18865802	+	PRPSAP2		2	1					1
chr17	18928957	18911103	+	PRPSAP2		2	1	1				1
chr17	19312144	19281955	+	EPN2		1	1					1
chr17	19329647	19309885	+	EPN2		60	1	1	1			1	1	1
chr10	71732375	71724045	+	CDH23		1	0
chr1	71935079	71935311	-	NEGR1		1	1	1	1			1	1	1	1
chr17	19657862	19651547	+	ALDH3A2		4	1	1	1			1	1	1	1
chr17	19671956	19651547	+	ALDH3A2		19	1	1	1			1	1
chr17	19795622	19801922	-	ULK2		1	0							1
chr17	19795622	19804830	-	ULK2		10	1	1	1			1	1	1	1
chr17	19810378	19826186	-	ULK2		1	0
chr17	19816749	19826186	-	ULK2		15	1	1	1			1	1
chr17	19816749	19838583	-	ULK2		4	1	1	1			1	1
chr17	19816749	19849774	-	ULK2		4	1					1	1
chr17	19825094	19849774	-	ULK2		3	1	1	1			1	1
chr10	105201253	105178066	+	SORCS3		8	1					1	1
chr10	71732375	71730469	+	CDH23		11	1	1	1			1	1
chr17	19838501	19843222	-	ULK2		1	1	1	1			1	1	1	1
chr17	19838501	19846910	-	ULK2		1	1	1	1			1	1
chr17	19909181	19924517	-	AKAP10		13	1	1	1			1	1	1	1
chr17	19909181	19963022	-	AKAP10		4	1	1	1			1	1
chr17	19920036	19936430	-	AKAP10		10	1	1	1			1	1
chr17	19920036	19947505	-	AKAP10		4	1	1	1	1	1	1	1	1	1
chr17	19920036	19963022	-	AKAP10		8	1	1	1			1	1	1
chr17	19920036	19968461	-	AKAP10		3	1					1	1
chr17	19924408	19963022	-	AKAP10		1	1	1	1			1	1
chr17	19931805	19958571	-	AKAP10		6	1	1	1			1	1
chr10	7188624	7285954	-	SFMBT2		3	1	1	1			1	1	1	1
chr17	19931805	19963022	-	AKAP10		2	1	1	1			1	1	1
chr17	19931805	19968461	-	AKAP10		2	1					1
chr17	19936286	19958571	-	AKAP10		2	1	1	1			1	1
chr17	19939713	19947505	-	AKAP10		1	1	1	1			1	1	1	1
chr17	19939713	19958571	-	AKAP10		12	1	1	1			1	1
chr17	19939713	19963022	-	AKAP10		6	1	1	1			1	1
chr17	19939713	19968461	-	AKAP10		5	1	1	1			1	1
chr17	19947407	19958571	-	AKAP10		2	1	1	1			1	1
chr17	19947407	19968461	-	AKAP10		3	1			1		1		1
chr17	19958014	19958571	-	AKAP10		12	1	1	1			1	1
chr10	7188624	7381949	-	SFMBT2		1	1					1	1
chr17	19958014	19968461	-	AKAP10		1	0							1
chr17	20110562	20017987	+	SPECC1	1	80	1	1	1			1	1
chr17	20110562	20096631	+	SPECC1		31	1	1	1			1	1
chr17	20205912	20204333	+	SPECC1	1	133	1	1	1	1	1	1	1	1	1
chr17	20227620	20204333	+	SPECC1		1	1	1	1			1	1	1
chr17	20232405	20204333	+	SPECC1		9	1	1	1			1	1
chr17	20232405	20231758	+	SPECC1		30	1	1				1	1
chr17	20232414	20204333	+	SPECC1		3	1	1	1			1	1
chr17	20260294	20247219	+	SPECC1		4	1	1	1	1	1	1	1	1	1
chr17	20260294	20253505	+	SPECC1		26	1	1	1	1	1	1	1	1	1
chr10	7197548	7285954	-	SFMBT2		1	1	1	1			1	1	1
chr17	20260294	20257451	+	SPECC1		2	1	1	1			1	1	1	1
chr17	20306082	20253505	+	SPECC1		7	1					1	1
chr17	21006896	21011309	-	USP22		7	1	1	1			1	1
chr17	21011151	21015899	-	USP22		36	1	1				1
chr17	21017942	21021226	-	USP22		1	1	1				1
chr17	21017942	21028674	-	USP22		1	1	1				1	1
chr17	21529022	21535538	-	C17orf51		5	1	1	1
chr17	2172658	2172859	-	SMG6		3	1	1				1	1
chr17	2172658	2244719	-	SMG6		1	1					1	1	1
chr17	2282647	2283735	-	SMG6		2	1	1	1			1	1	1	1
chr10	72128082	72152988	-	ASCC1		2	1	1	1			1	1
chr17	2282647	2292977	-	SMG6		3	1	1	1			1	1	1
chr17	2297243	2300664	-	SMG6		6	1	1	1			1	1
chr17	2318929	2315557	+	SRR		6	1	1	1			1	1
chr17	2361799	2343545	+	SGSM2		1	0
chr17	2394043	2395454	-	MNT		18	1	1	1			1	1	1
chr17	2438109	2467876	-	METTL16		3	1	1	1			1	1
chr17	2438109	2473664	-	METTL16		2	1	1	1			1	1
chr17	2438109	2477885	-	METTL16		1	1					1		1	1
chr17	2638320	2635383	+	PAFAH1B1		1	1	1	1			1	1
chr17	2676606	2665372	+	PAFAH1B1		3	1					1	1	1
chr10	72152869	72203524	-	ASCC1		2	1					1		1
chr17	2680320	2676505	+	PAFAH1B1		1	1	1	1			1	1
chr17	27309272	27303367	+	WSB1		3	1	1	1			1	1
chr17	27309272	27304780	+	WSB1		3	1	1	1			1	1
chr17	27310174	27303367	+	WSB1		3	1	1	1			1	1
chr17	27610198	27605434	+	KSR1		1	0
chr17	27765535	27766588	-	NOS2		2	1	1	1			1	1
chr17	28163628	28122603	+	NLK		3	1	1				1	1
chr17	28168657	28122603	+	NLK		4	1					1
chr17	28168657	28132620	+	NLK		1	1					1	1
chr17	28168657	28163543	+	NLK		7	1	1	1			1	1
chr10	72196811	72203524	-	ASCC1		9	1	1	1			1	1	1	1
chr17	28172618	28122603	+	NLK	1	123	1	1	1			1	1	1	1
chr17	28172618	28132620	+	NLK		25	1	1	1			1	1
chr17	28172618	28163543	+	NLK	1	119	1	1	1			1	1
chr17	281768	321415	-	RPH3AL		2	1	1				1
chr17	28185265	28122603	+	NLK		3	1					1
chr17	28185265	28132620	+	NLK		1	1					1
chr17	28185265	28163543	+	NLK		15	1	1	1			1	1
chr17	28185265	28168448	+	NLK		11	1	1	1			1	1	1
chr17	28350438	28351800	-	POLDIP2		2	1	1	1			1	1
chr17	28683816	28681882	+	SUPT6H		3	1	1	1			1	1
chr10	72196811	72210831	-	ASCC1		2	1	1				1
chr17	28917285	28921808	-	PHF12		2	1	1	1			1	1	1	1
chr17	28917285	28927063	-	PHF12		2	1	1				1	1	1	1
chr17	28921688	28924302	-	PHF12		7	1	1	1			1	1	1
chr17	28921688	28927063	-	PHF12		18	1	1	1			1	1	1
chr17	29082316	29087121	-	MYO18A		1	1					1
chr17	29103599	29107189	-	MYO18A		4	1	1	1			1	1
chr17	29285992	29287716	-	NUFIP2		28	1	1	1			1	1	1	1
chr17	29451680	29451455	+	TAOK1		18	1	1	1			1	1
chr17	29467216	29451455	+	TAOK1		8	1	1	1			1	1
chr17	29475771	29451455	+	TAOK1		2	1	1	1			1	1
chr10	72196811	72213331	-	ASCC1		17	1	1	1			1	1	1	1
chr17	29478347	29451455	+	TAOK1		1	1	1	1			1	1
chr17	29482288	29451455	+	TAOK1		9	1	1	1			1	1
chr17	29491865	29451455	+	TAOK1		2	1	1				1	1
chr17	29491865	29480368	+	TAOK1		9	1	1	1			1	1
chr17	29491865	29482197	+	TAOK1		15	1	1	1			1	1	1
chr17	29495727	29480368	+	TAOK1		5	1	1	1			1	1	1
chr17	29495727	29482197	+	TAOK1		4	1	1	1			1	1	1
chr17	29498521	29482197	+	TAOK1		8	1	1	1			1	1	1
chr17	29502723	29482197	+	TAOK1		1	1	1	1			1	1	1
chr10	7220411	7227937	-	SFMBT2		4	1	1	1			1	1	1
chr17	29508132	29451455	+	TAOK1		1	1	1	1
chr17	29510992	29451455	+	TAOK1		1	1	1				1	1
chr17	29510992	29480368	+	TAOK1		3	1	1	1			1	1
chr17	29510992	29482197	+	TAOK1		50	1	1	1			1	1
chr17	29510992	29502589	+	TAOK1		3	1	1	1			1	1	1
chr17	29517656	29482197	+	TAOK1		22	1	1	1			1	1	1	1
chr17	29517656	29510864	+	TAOK1		2	1	1	1			1	1	1	1
chr17	29522519	29451455	+	TAOK1		1	1	1	1			1	1
chr17	29522519	29482197	+	TAOK1		2	1	1	1			1	1
chr17	29534300	29451455	+	TAOK1		5	1	1	1			1	1
chr10	105211250	105167258	+	SORCS3		9	1	1	1			1	1	1
chr10	7220411	7248649	-	SFMBT2		1	1	1	1			1	1
chr17	29534300	29482197	+	TAOK1		1	1	1	1			1	1
chr17	29534300	29517453	+	TAOK1		1	1	1	1			1	1	1	1
chr17	29648144	29650800	-	SSH2		2	1	1	1			1	1
chr17	29648144	29655607	-	SSH2		6	1	1	1			1	1
chr17	29648144	29667223	-	SSH2		5	1	1	1			1	1	1
chr17	29648144	29672129	-	SSH2		24	1	1	1			1	1	1	1
chr17	29655561	29703062	-	SSH2		1	1					1
chr17	29666867	29684684	-	SSH2		1	1	1	1			1	1
chr17	29666867	29695523	-	SSH2		3	1					1	1
chr17	29666867	29703062	-	SSH2		3	1	1				1	1
chr10	7220411	7276989	-	SFMBT2		5	1	1	1			1	1	1
chr17	29676820	29684684	-	SSH2		8	1	1	1			1	1
chr17	29676820	29695523	-	SSH2		11	1	1	1			1	1
chr17	29676820	29703062	-	SSH2		16	1	1	1			1	1
chr17	29684563	29703062	-	SSH2		54	1	1	1			1	1
chr17	29695459	29703062	-	SSH2		1	1	1	1			1	1	1	1
chr17	2998376	2963430	+	RAP1GAP2		2	1	1	1			1	1
chr17	2998376	2991297	+	RAP1GAP2		1	1					1	1
chr17	30054148	30051118	+	EFCAB5		1	0
chr17	3020595	2991297	+	RAP1GAP2		2	1					1
chr17	30266885	30286902	-	BLMH		17	1	1	1			1	1
chr10	7220411	7285954	-	SFMBT2		58	1	1	1			1	1	1	1
chr17	30451846	30449553	+	CPD		2	1	1	1			1	1
chr17	30456526	30451711	+	CPD		2	1	1	1			1	1
chr17	30484770	30481143	+	GOSR1		2	1	1	1			1	1
chr17	30490217	30481143	+	GOSR1		9	1	1	1			1	1
chr17	30492753	30481143	+	GOSR1		7	1	1	1			1	1
chr17	30492753	30484214	+	GOSR1		22	1	1	1			1	1	1	1
chr17	30510909	30481143	+	GOSR1		3	1					1	1
chr17	30510909	30484214	+	GOSR1		5	1	1	1			1	1
chr17	30520021	30484214	+	GOSR1		34	1	1	1			1	1
chr17	30759539	30734897	+	SUZ12P1		7	1					1	1
chr10	72230440	72223888	+	ANAPC16		5	1	1	1			1	1
chr17	30766588	30734897	+	SUZ12P1		4	1	1				1	1
chr17	30769064	30734897	+	SUZ12P1		1	1					1	1
chr17	30785919	30796337	-	CRLF3		2	1	1	1			1	1
chr17	30792440	30793672	-	CRLF3		1	1	1				1	1
chr17	30792440	30804108	-	CRLF3		7	1					1	1	1	1
chr17	30793450	30804108	-	CRLF3		2	1					1	1
chr17	31163376	31155983	+	NF1		18	1	1	1	1	1	1	1	1	1
chr17	31169997	31155983	+	NF1		42	1	1	1	1	1	1	1	1	1
chr17	31182665	31155983	+	NF1		45	1	1	1			1	1
chr17	31182665	31181422	+	NF1		1	1	1	1			1	1	1
chr10	7227855	7285954	-	SFMBT2		5	1	1	1			1	1
chr17	31206371	31155983	+	NF1		9	1	1	1	1		1	1	1
chr17	31206371	31181422	+	NF1		30	1	1	1	1	1	1	1	1	1
chr17	31214585	31181422	+	NF1		1	1					1	1
chr17	31214585	31200422	+	NF1		4	1	1	1			1	1
chr17	31219118	31155983	+	NF1		3	1	1	1			1	1	1
chr17	31219118	31163186	+	NF1		3	1	1	1			1	1
chr17	31219118	31181422	+	NF1		3	1	1	1			1	1	1
chr17	31219118	31200422	+	NF1		7	1	1	1			1	1
chr17	31219118	31206240	+	NF1		4	1	1	1			1	1	1
chr17	31227606	31223444	+	NF1		41	1	1	1			1	1
chr10	72340789	72341170	-	DNAJB12	1	100	1	1	1			1	1
chr17	31265339	31200422	+	NF1		2	1	1	1			1	1
chr17	31265339	31248984	+	NF1		14	1	1	1			1	1	1	1
chr17	31265339	31252938	+	NF1		1	1					1		1
chr17	31326252	31325820	+	NF1		3	1	1	1			1	1
chr17	31330498	31325820	+	NF1		1	1	1	1			1	1	1
chr17	31517877	31509077	+	RAB11FIP4		1	0
chr17	31517877	31517651	+	RAB11FIP4		39	1	1	1			1	1
chr17	31525230	31517651	+	RAB11FIP4		1	1	1	1			1	1
chr17	31525230	31525090	+	RAB11FIP4		3	1	1	1	1		1	1	1
chr17	31528778	31527842	+	RAB11FIP4		3	1	1	1			1	1
chr10	72407929	72508269	-	MICU1		1	1					1	1
chr17	31880573	31887313	-	UTP6		2	1	1	1			1	1
chr17	31880573	31895011	-	UTP6		1	0
chr17	31884424	31887313	-	UTP6		1	1	1	1			1	1
chr17	31884424	31892794	-	UTP6		2	1	1	1			1	1
chr17	31966196	31940286	+	SUZ12		28	1	1				1	1
chr17	31973231	31940286	+	SUZ12		51	1	1				1	1	1
chr17	31988497	31940286	+	SUZ12		8	1	1				1	1
chr17	31988497	31947617	+	SUZ12		5	1					1	1	1	1
chr17	31988497	31966147	+	SUZ12		3	1	1	1			1	1
chr17	31988497	31975482	+	SUZ12		1	1	1	1			1	1	1
chr10	7243558	7276989	-	SFMBT2		1	1	1	1			1	1
chr17	31988497	31982999	+	SUZ12		59	1	1				1	1	1
chr17	31988497	31988320	+	SUZ12		13	1	1	1			1	1
chr17	31993333	31940286	+	SUZ12		2	1	1				1
chr17	31994721	31993865	+	SUZ12		4	1	1	1			1	1	1	1
chr17	31995762	31940286	+	SUZ12		1	1	1	1			1
chr17	31995762	31993865	+	SUZ12		3	1	1	1			1	1
chr17	31996877	31940286	+	SUZ12		6	1					1
chr17	31996877	31988320	+	SUZ12		1	1	1				1	1
chr17	31996877	31993865	+	SUZ12		2	1	1	1			1	1
chr17	32176213	32171043	+	RHOT1		1	1	1				1	1	1
chr10	7243558	7285954	-	SFMBT2	1	122	1	1	1			1	1	1	1
chr17	32176213	32173831	+	RHOT1		1	1	1		1	1	1	1	1	1
chr17	32183272	32171043	+	RHOT1		34	1	1	1			1	1	1
chr17	32194107	32171043	+	RHOT1		3	1	1	1			1	1
chr17	32194107	32173831	+	RHOT1		14	1	1				1	1
chr17	32202900	32200956	+	RHOT1		6	1	1	1			1	1
chr17	32203973	32200956	+	RHOT1		3	1	1	1			1	1	1
chr17	32203973	32202770	+	RHOT1		2	1	1	1	1	1	1	1	1	1
chr17	32208309	32182757	+	RHOT1		1	1	1	1			1	1
chr17	32305441	32288792	+	RHBDL3		1	1					1	1
chr17	32305441	32294294	+	RHBDL3		4	1	1						1
chr10	7243558	7381949	-	SFMBT2		3	1					1	1
chr17	32305441	32294345	+	RHBDL3		1	1					1
chr17	32316292	32288792	+	RHBDL3		7	1	1	1			1	1
chr17	32316292	32294294	+	RHBDL3		3	1					1		1	1
chr17	32333417	32338351	-	C17orf75		1	1	1	1			1	1
chr17	32368014	32362914	+	ZNF207		5	1	1	1			1	1
chr17	32605087	32659338	-	MYO1D		1	1	1				1	1
chr17	32605087	32755662	-	MYO1D		8	1					1	1	1
chr17	32638722	32755662	-	MYO1D		4	1	1				1	1	1	1
chr17	32711988	32738385	-	MYO1D		3	1	1	1			1	1
chr17	32711988	32749006	-	MYO1D		14	1	1	1			1	1
chr10	105211250	105178066	+	SORCS3		7	1	1	1			1	1
chr10	7248548	7285954	-	SFMBT2		16	1	1	1			1	1	1
chr17	32711988	32755662	-	MYO1D		22	1	1	1			1	1	1	1
chr17	32711988	32772842	-	MYO1D		6	1	1	1			1	1
chr17	32738253	32749006	-	MYO1D		4	1	1	1			1	1	1
chr17	32748936	32776029	-	MYO1D		1	0
chr17	33088863	33112067	-	ASIC2	1	86	1	1	1	1	1	1	1	1	1
chr17	33111917	33112067	-	ASIC2		1	1					1	1
chr17	3446472	3469398	-	SPATA22		1	1					1	1
chr17	34928962	34942906	-	CCT6B		1	1	1	1			1	1	1
chr17	34942484	34958694	-	CCT6B		7	1	1	1			1	1
chr17	34983552	34983002	+	LIG3		2	1	1	1			1	1
chr10	7248548	7381949	-	SFMBT2		2	1					1
chr17	34986131	34983002	+	LIG3		18	1	1	1			1	1
chr17	35101201	35103544	-	RAD51D,AC004223.3		1	1	1	1			1	1
chr17	35608387	35594008	+	AP2B1		1	1	1				1	1	1
chr17	35627726	35624397	+	AP2B1		3	1	1				1	1
chr17	35820437	35817716	+	TAF15		1	1					1		1	1
chr17	35820437	35820024	+	TAF15		11	1	1	1			1	1	1
chr17	35822833	35817240	+	TAF15		1	1					1
chr17	35822833	35817716	+	TAF15		1	1					1
chr17	35838553	35817716	+	TAF15		1	0
chr17	35838553	35824078	+	TAF15		2	1	1						1	1
chr10	72508155	72566794	-	MICU1		2	1	1	1			1	1
chr17	36509062	36511455	-	MYO19		27	1	1	1			1	1
chr17	36560871	36554820	+	GGNBP2		3	1	1	1			1	1
chr17	36560871	36557083	+	GGNBP2		3	1	1	1			1	1	1
chr17	36567776	36554820	+	GGNBP2		7	1	1	1			1	1	1	1
chr17	36581538	36577983	+	GGNBP2		1	1					1		1
chr17	36586198	36567663	+	GGNBP2		6	1					1	1
chr17	36587245	36567663	+	GGNBP2		1	0
chr17	36587245	36577983	+	GGNBP2		1	1					1
chr17	36587245	36581344	+	GGNBP2		1	1	1	1			1
chr17	36953907	36952886	+	AATF	1	86	1	1	1			1	1
chr10	72551179	72566794	-	MICU1		7	1	1	1			1	1	1
chr17	36986731	36952886	+	AATF		2	1					1
chr17	36990857	36986617	+	AATF		4	1	1	1			1	1	1	1
chr17	36990857	36988519	+	AATF		1	1					1
chr17	37031685	36988519	+	AATF		2	1	1	1			1
chr17	37149864	37181356	-	ACACA		13	1	1	1			1	1	1
chr17	37161781	37200483	-	ACACA		1	0
chr17	37179260	37181356	-	ACACA		13	1	1				1	1
chr17	37205765	37226452	-	ACACA		1	0
chr17	37221724	37226452	-	ACACA		5	1	1	1			1	1	1
chr17	37246826	37253036	-	ACACA		34	1	1	1			1	1
chr10	72562895	72566794	-	MICU1		26	1	1	1			1	1	1
chr17	37248011	37253036	-	ACACA		18	1	1	1			1	1
chr17	37283267	37284970	-	ACACA		6	1	1	1			1	1	1
chr17	37283267	37289528	-	ACACA		33	1	1	1			1	1
chr17	37284838	37289528	-	ACACA		1	1	1	1			1	1
chr17	37330173	37330425	-	ACACA		1	1	1	1			1	1	1
chr17	37427009	37411269	+	TADA2A		1	1					1	1
chr17	37440662	37437738	+	TADA2A		25	1	1	1			1	1	1
chr17	37440662	37440505	+	TADA2A		9	1	1	1			1	1
chr17	37440662	37440509	+	TADA2A		5	1	1	1			1	1
chr17	37442652	37437738	+	TADA2A		8	1	1	1			1	1
chr10	72715902	72708283	+	MCU		113	1	1	1			1	1
chr17	37442652	37440505	+	TADA2A		22	1	1	1			1	1
chr17	37442652	37440509	+	TADA2A		13	1	1	1			1
chr17	37444768	37437738	+	TADA2A		39	1	1	1			1	1	1	1
chr17	37444768	37440505	+	TADA2A		13	1	1	1			1	1
chr17	37458587	37440505	+	TADA2A		1	1	1	1
chr17	37462121	37437738	+	TADA2A		3	1					1	1
chr17	37462121	37440505	+	TADA2A		27	1	1	1			1	1
chr17	37465541	37437738	+	TADA2A		10	1	1	1			1	1	1
chr17	37465541	37440505	+	TADA2A		35	1	1	1			1	1
chr17	37467525	37437738	+	TADA2A		1	1	1	1			1	1
chr10	72715902	72715111	+	MCU		5	1	1	1			1	1
chr17	37467525	37440505	+	TADA2A		20	1	1	1			1	1
chr17	37561195	37585430	-	SYNRG		2	1					1	1
chr17	37568791	37585430	-	SYNRG		2	1					1	1
chr17	37570637	37585430	-	SYNRG		1	0
chr17	37571791	37585430	-	SYNRG		6	1	1	1			1	1
chr17	37576341	37585430	-	SYNRG		24	1	1	1			1	1
chr17	37576341	37586549	-	SYNRG		5	1	1	1			1	1	1
chr17	37584648	37585430	-	SYNRG		2	1	1	1			1	1
chr17	37584648	37586549	-	SYNRG		4	1	1	1			1	1
chr17	37584648	37600403	-	SYNRG		1	1	1	1			1	1
chr10	7276892	7285954	-	SFMBT2	1	117	1	1	1			1	1	1	1
chr17	37618292	37628672	-	DDX52		1	0
chr17	3814322	3816270	-	NCBP3		18	1	1	1			1	1
chr17	3814322	3818572	-	NCBP3		1	1					1	1
chr17	38368050	38361711	+	SOCS7		27	1	1	1			1	1
chr17	38377842	38361711	+	SOCS7		21	1	1	1			1	1
chr17	38377842	38364752	+	SOCS7		2	1	1				1	1
chr17	38395998	38395309	+	SOCS7		5	1	1	1	1	1	1	1	1	1
chr17	38777687	38786920	-	PIP4K2B		10	1	1	1			1	1
chr17	39216810	39217173	-	STAC2		7	1	1	1			1	1
chr17	39264175	39275100	-	FBXL20		2	1					1	1
chr10	7276892	7381949	-	SFMBT2		22	1	1				1	1
chr17	39268827	39275100	-	FBXL20		1	1	1	1			1	1
chr17	39281389	39282855	-	FBXL20		1	1	1				1	1
chr17	39281389	39297195	-	FBXL20		2	1	1	1			1	1
chr17	39281389	39301075	-	FBXL20		1	1					1
chr17	39281389	39303639	-	FBXL20		3	1	1	1			1	1
chr17	39297127	39301075	-	FBXL20		3	1	1	1			1	1
chr17	39297127	39303639	-	FBXL20		8	1	1	1			1	1	1
chr17	39297127	39343241	-	FBXL20		23	1	1	1			1	1	1	1
chr17	39298990	39301075	-	FBXL20		1	1	1	1			1	1
chr17	39419717	39427790	-	MED1		2	1	1	1			1	1	1
chr10	7283904	7285954	-	SFMBT2		4	1	1	1			1	1
chr17	39423327	39427790	-	MED1		7	1	1	1			1	1
chr17	39424627	39431188	-	MED1		2	1	1	1			1
chr17	39439165	39443628	-	MED1		1	1	1	1			1	1
chr17	39492890	39490557	+	CDK12		6	1	1	1			1	1
chr17	39501439	39490557	+	CDK12		1	1	1				1	1	1
chr17	39509761	39490557	+	CDK12		1	1	1	1			1		1	1
chr17	39520087	39490557	+	CDK12		1	1					1
chr17	39908958	39909924	-	GSDMB		7	1	1	1			1	1
chr17	40053298	40053635	-	MED24		4	1	1	1			1	1
chr17	40053298	40053657	-	MED24		2	1	1	1			1	1
chr10	105247331	105211137	+	SORCS3		4	1	1	1			1	1
chr10	73016846	73047101	-	P4HA1		1	1					1
chr17	40084815	40083835	+	THRA		1	1	1				1	1
chr17	40126406	40126183	+	MSL1		66	1	1	1			1	1
chr17	40162901	40161753	+	CASC3		4	1	1	1			1	1
chr17	40189375	40188866	+	RAPGEFL1		6	1	1	1			1	1
chr17	4021129	4025118	-	ZZEF1		26	1	1	1			1	1	1	1
chr17	40262641	40260535	+	WIPF2		6	1	1	1			1	1
chr17	4034015	4064829	-	ZZEF1		3	1	1	1			1	1
chr17	4042429	4044374	-	ZZEF1		1	1					1		1	1
chr17	4051971	4058155	-	ZZEF1		14	1	1	1			1	1
chr17	4051971	4064829	-	ZZEF1		7	1	1	1			1	1
chr10	73030271	73068983	-	P4HA1		4	1	1	1			1	1
chr17	4051971	4067242	-	ZZEF1		17	1	1	1			1	1
chr17	4064361	4067242	-	ZZEF1		2	1	1	1			1	1
chr17	4066447	4072756	-	ZZEF1		63	1	1	1			1	1
chr17	4067163	4074351	-	ZZEF1		1	1	1	1			1	1
chr17	4081376	4082507	-	ZZEF1		1	1	1	1			1	1
chr17	41827426	41828952	-	NT5C3B		1	1	1	1			1	1
chr17	41828790	41830890	-	NT5C3B		4	1	1	1			1	1
chr17	41828790	41832477	-	NT5C3B		8	1	1	1			1	1
chr17	4197373	4209947	-	ANKFY1		1	1	1	1			1	1	1	1
chr17	4197373	4217118	-	ANKFY1		1	1	1	1			1	1	1
chr10	73134603	73152421	-	ECD		2	1	1	1
chr17	41981855	41982401	-	DNAJC7		3	1	1	1			1	1
chr17	41987819	41990382	-	DNAJC7		1	1	1				1	1	1
chr17	42022640	42022399	+	NKIRAS2		3	1	1	1			1	1
chr17	4216983	4242448	-	ANKFY1		2	1	1				1		1	1
chr17	42324711	42325061	-	STAT3		1	1	1	1			1	1
chr17	42345559	42348517	-	STAT3		8	1	1	1			1	1
chr17	42345559	42348520	-	STAT3		8	1	1	1			1	1
chr17	42345559	42348539	-	STAT3		6	1	1	1			1	1
chr17	4235772	4242448	-	ANKFY1		6	1	1	1			1	1	1	1
chr17	4242256	4242448	-	ANKFY1		4	1	1	1			1	1
chr10	73134603	73163950	-	ECD		8	1	1	1
chr17	42470218	42468010	+	ATP6V0A1		6	1	1	1			1	1
chr17	42478589	42468010	+	ATP6V0A1		1	0
chr17	42480749	42468010	+	ATP6V0A1		1	1					1	1
chr17	42483131	42468010	+	ATP6V0A1		3	1	1	1			1	1
chr17	42494473	42480667	+	ATP6V0A1		29	1	1	1			1	1
chr17	42494473	42483038	+	ATP6V0A1		5	1	1	1			1	1
chr17	42494473	42490487	+	ATP6V0A1		1	1	1	1			1	1
chr17	42495716	42480667	+	ATP6V0A1		5	1	1	1			1	1
chr17	42495716	42490487	+	ATP6V0A1		1	1					1	1	1
chr17	42499042	42480667	+	ATP6V0A1		4	1	1	1			1	1
chr10	73146276	73156655	-	ECD		3	1	1	1			1	1	1	1
chr17	42499042	42487155	+	ATP6V0A1		1	1	1	1			1	1
chr17	42501304	42477660	+	ATP6V0A1		1	1					1
chr17	42501304	42483038	+	ATP6V0A1		2	1					1	1
chr17	42501304	42487155	+	ATP6V0A1		1	1	1	1			1	1
chr17	42501304	42490487	+	ATP6V0A1		1	1					1	1
chr17	42501304	42495034	+	ATP6V0A1		3	1	1	1			1	1
chr17	42501304	42498924	+	ATP6V0A1	1	85	1	1	1			1	1
chr17	42501304	42500707	+	ATP6V0A1		54	1	1	1			1	1
chr17	42502868	42498924	+	ATP6V0A1		1	0
chr17	42508589	42480667	+	ATP6V0A1		1	0
chr10	73146276	73163950	-	ECD		45	1	1	1			1	1
chr17	42613073	42612075	+	TUBG1		2	1	1	1			1	1
chr17	42702877	42708916	-	EZH1		1	0
chr1	74271708	74236102	+	FPGT-TNNI3K,TNNI3K		8	1	1	1			1	1
chr1	74271708	74249459	+	FPGT-TNNI3K,TNNI3K		6	1	1	1			1	1
chr17	42720273	42724424	-	EZH1		2	1	1	1			1	1
chr17	42720273	42727763	-	EZH1		3	1	1	1			1	1
chr17	42720273	42730918	-	EZH1		2	1					1
chr17	42727635	42728952	-	EZH1		13	1	1	1			1	1
chr17	42727635	42730918	-	EZH1		57	1	1	1			1	1
chr17	42727662	42730918	-	EZH1		5	1	1				1	1
chr10	73154256	73163950	-	ECD		1	1	1	1			1	1
chr17	42728825	42730918	-	EZH1		16	1	1	1			1	1
chr17	42818221	42820841	-	BECN1		1	1	1	1	1	1	1	1	1	1
chr17	4282798	4296814	-	UBE2G1	1	72	1	1	1			1	1
chr17	4282798	4307123	-	UBE2G1		24	1	1	1			1	1	1	1
chr17	42839380	42837649	+	PSME3		18	1	1	1			1	1	1
chr17	42839380	42838731	+	PSME3		15	1	1	1			1	1
chr17	43047643	43067695	-	BRCA1		1	1					1	1
chr17	43082404	43094860	-	BRCA1		1	1					1
chr17	43104122	43115779	-	BRCA1		1	1					1
chr17	43203786	43201686	+	NBR1		1	1	1	1			1	1
chr10	73269614	73278337	-	CFAP70		1	1	1	1			1
chr1	74370392	74249459	+	FPGT-TNNI3K,TNNI3K		2	1					1	1
chr17	44080107	44080882	-	HDAC5		2	1	1	1			1	1
chr17	44083545	44083854	-	HDAC5		11	1	1	1			1	1
chr17	44084555	44085155	-	HDAC5		1	1	1	1			1	1
chr17	44084555	44087696	-	HDAC5	1	87	1	1	1			1	1
chr17	44086572	44088598	-	HDAC5		3	1	1	1			1	1
chr17	44405921	44474903	-	GPATCH8		1	1					1
chr17	44424349	44438715	-	GPATCH8		2	1	1				1
chr17	44424349	44474903	-	GPATCH8		4	1	1	1			1	1	1
chr17	44464472	44474903	-	GPATCH8		1	1	1	1			1	1
chr10	73299605	73345244	-	CFAP70		3	0
chr1	74463550	74249459	+	FPGT-TNNI3K,TNNI3K		4	1					1	1
chr17	44857075	44860543	-	EFTUD2		1	1	1				1
chr1	74492266	74439490	+	FPGT-TNNI3K,TNNI3K		28	1	1	1			1	1
chr1	74492266	74463441	+	FPGT-TNNI3K,TNNI3K		3	1	1	1			1	1
chr1	74492266	74489189	+	FPGT-TNNI3K,TNNI3K		20	1	1	1			1	1
chr17	45086652	45081644	+	NMT1		18	1	1	1	1		1	1	1
chr17	45097244	45096194	+	NMT1		1	1	1	1			1	1	1
chr17	45475100	45478147	-	PLEKHM1		1	1	1				1
chr1	74589631	74606902	-	ERICH3		1	1					1
chr10	73299605	73348235	-	CFAP70		1	0
chr17	45978440	45962321	+	MAPT		6	0
chr17	45996664	45971859	+	MAPT		4	0
chr17	45996664	45978375	+	MAPT		23	1					1	1	1	1
chr17	45996664	45987040	+	MAPT		10	1					1	1	1	1
chr17	46018730	45962321	+	MAPT		1	0
chr17	46050533	46067667	-	KANSL1		20	1	1		1	1			1	1
chr17	46050533	46082542	-	KANSL1		8	1	1		1	1			1	1
chr17	46050533	46094701	-	KANSL1		47	1	1		1	1			1	1
chr17	46050533	46172232	-	KANSL1		1	0
chr17	46066537	46067667	-	KANSL1		21	1	1						1
chr10	106579091	106620561	-	SORCS1		1	0
chr10	73310158	73312643	-	CFAP70		6	1	1				1	1
chr17	46066537	46082542	-	KANSL1		3	1	1				1		1
chr17	46066537	46094701	-	KANSL1	1	76	1	1		1	1	1		1	1
chr17	46066537	46172232	-	KANSL1		2	0
chr17	46082441	46094701	-	KANSL1		12	1	1		1	1	1		1	1
chr17	46082441	46172232	-	KANSL1		6	1			1		1		1
chr17	46152904	46172232	-	KANSL1		3	1					1
chr17	46170855	46172232	-	KANSL1		54	1	1		1	1	1		1	1
chr17	47129393	47143982	-	CDC27		1	1	1	1			1	1	1	1
chr17	47129393	47172064	-	CDC27		52	1	1	1			1	1
chr17	47132257	47172064	-	CDC27		1	1					1
chr10	73310158	73331276	-	CFAP70		3	1					1	1
chr17	47345098	47326226	+	EFCAB13		18	1	1	1			1	1
chr17	47379253	47361378	+	EFCAB13		2	1	1	1			1	1
chr17	47414919	47361378	+	EFCAB13		2	1	1	1			1	1
chr17	47414919	47402132	+	EFCAB13		10	1	1	1			1	1
chr17	47601747	47596353	+	NPEPPS		3	1	1	1			1	1
chr17	47605552	47592485	+	NPEPPS		1	1					1	1
chr17	47605552	47601608	+	NPEPPS		2	1	1	1			1	1	1	1
chr17	47613725	47596353	+	NPEPPS		11	1	1	1			1	1
chr17	47613725	47601608	+	NPEPPS		5	1	1	1			1	1
chr17	47619164	47613669	+	NPEPPS		2	1	1	1			1	1
chr10	73310158	73345244	-	CFAP70		4	1					1	1
chr17	47619164	47618350	+	NPEPPS		45	1	1	1			1	1
chr17	47619784	47618350	+	NPEPPS		2	1	1	1			1	1	1
chr17	47668410	47663089	+	KPNB1		46	1	1	1			1	1
chr17	47668410	47664159	+	KPNB1		59	1	1	1			1	1
chr17	47670832	47664159	+	KPNB1		3	1	1	1			1	1
chr17	47674782	47663089	+	KPNB1		5	1	1	1			1	1
chr17	47674782	47664159	+	KPNB1		37	1	1	1			1	1
chr17	48032156	48033944	-	COPZ2		1	1	1				1
chr17	48112660	48112031	+	SNX11		6	1	1	1			1	1
chr17	48113401	48112031	+	SNX11	1	87	1	1	1			1	1
chr10	73322963	73335524	-	CFAP70		1	0
chr17	48119186	48112031	+	SNX11		1	1	1				1	1
chr17	48922937	48912834	+	UBE2Z		1	1					1
chr17	49311312	49312042	-	ZNF652		40	1	1	1			1	1
chr17	49311312	49312845	-	ZNF652		52	1	1	1			1	1	1	1
chr17	49311312	49317983	-	ZNF652		23	1	1	1			1	1	1	1
chr17	49719760	49720436	-	FAM117A		1	1	1	1			1	1
chr17	49796926	49791886	+	KAT7		2	1	1	1			1	1
chr17	49815913	49805363	+	KAT7		2	1					1	1	1
chr17	50139263	50141373	-	PPP1R9B		4	1	1				1	1
chr17	50741246	50736960	+	LUC7L3		1	1					1		1
chr10	73322963	73341581	-	CFAP70		1	0
chr17	50741731	50736960	+	LUC7L3		25	1	1	1			1	1	1	1
chr17	50741731	50741102	+	LUC7L3		26	1	1	1			1	1
chr17	50744813	50736960	+	LUC7L3		7	1	1	1			1	1
chr17	50746702	50736960	+	LUC7L3		8	1					1
chr17	50970707	50987237	-	SPAG9		45	1	1	1			1	1
chr17	50970707	50990668	-	SPAG9		1	1					1	1	1
chr17	50979746	50987237	-	SPAG9		13	1	1	1			1	1
chr17	50979746	50989872	-	SPAG9		2	1	1	1			1	1
chr17	50979746	50990668	-	SPAG9		2	1	1	1			1	1	1	1
chr17	50979746	50995533	-	SPAG9		2	1	1	1			1	1
chr10	73378911	73380201	-	ANXA7		3	1					1	1
chr17	50982524	50984990	-	SPAG9		5	1					1	1
chr17	50982524	50985778	-	SPAG9		18	1	1				1	1
chr17	50982524	50987237	-	SPAG9		25	1	1				1	1
chr17	50982524	50990668	-	SPAG9		4	1	1				1	1	1	1
chr17	50984923	50987237	-	SPAG9		7	1	1	1			1	1
chr17	50989677	50993935	-	SPAG9		1	1	1	1			1	1
chr17	50989677	50999717	-	SPAG9		1	0
chr17	50990450	50993935	-	SPAG9		8	1	1	1			1	1
chr17	50990450	50998617	-	SPAG9		4	1	1	1			1	1
chr17	50998444	51001845	-	SPAG9		1	1	1	1			1	1
chr10	73378911	73388414	-	ANXA7		1	1					1
chr17	51005212	51021365	-	SPAG9		1	1					1
chr17	51014232	51021365	-	SPAG9		12	1	1	1			1	1	1	1
chr17	51014232	51056482	-	SPAG9		3	1	1	1			1	1	1
chr17	51014232	51079704	-	SPAG9		1	1					1	1	1
chr17	51020159	51021365	-	SPAG9		3	1	1	1			1	1	1
chr17	51020159	51031722	-	SPAG9		6	1	1	1			1	1
chr17	51020159	51041651	-	SPAG9		2	1	1	1			1	1	1
chr17	51031681	51056482	-	SPAG9		2	1					1	1
chr17	51031681	51079704	-	SPAG9		1	0
chr17	51041501	51056482	-	SPAG9		24	1	1	1			1	1	1	1
chr10	73383175	73383690	-	ANXA7		2	1	1	1			1	1
chr17	51041501	51079704	-	SPAG9		21	1	1	1			1	1	1	1
chr17	51047375	51079704	-	SPAG9		1	1					1	1
chr17	51201592	51203228	-	MBTD1		5	1	1	1			1	1	1
chr17	51201592	51203925	-	MBTD1		2	1	1	1			1	1
chr17	51201592	51219044	-	MBTD1		1	1					1	1
chr17	51201592	51225209	-	MBTD1		2	1	1	1			1	1	1	1
chr17	51217334	51220463	-	MBTD1		1	1	1	1			1	1
chr17	51217334	51225209	-	MBTD1		29	1	1	1			1	1	1	1
chr17	51218930	51225209	-	MBTD1		5	1	1	1			1	1
chr17	51268904	51263274	+	UTP18	1	113	1	1	1			1	1
chr10	73387689	73388414	-	ANXA7		2	1	1	1			1	1
chr17	51268904	51266182	+	UTP18		1	1	1	1			1	1
chr17	51273450	51263274	+	UTP18		2	1	1	1			1	1
chr17	51288203	51263274	+	UTP18		37	1	1	1			1	1
chr17	51294045	51263274	+	UTP18		7	1	1	1			1	1
chr17	5215293	5209750	+	AC087500.1		7	1	1	1			1	1
chr17	5215293	5214050	+	AC087500.1		1	1	1	1			1	1
chr17	5223484	5214050	+	AC087500.1		3	1					1	1
chr1	75251210	75339630	-	SLC44A5		1	1	1	1
chr1	75251210	75396621	-	SLC44A5		1	1					1	1
chr17	5332152	5308694	+	RABEP1		26	1	1	1	1	1	1	1	1	1
chr17	5332152	5331949	+	RABEP1		9	1	1	1			1	1
chr17	5346925	5308694	+	RABEP1		64	1	1	1	1	1	1	1	1	1
chr17	5346925	5331949	+	RABEP1		2	1	1				1	1
chr17	5350629	5308694	+	RABEP1		15	1	1	1	1	1	1	1	1	1
chr17	5350629	5346790	+	RABEP1		4	1	1	1	1		1	1	1	1
chr17	5354490	5308694	+	RABEP1		17	1			1	1	1	1	1	1
chr17	5354490	5346790	+	RABEP1		1	1	1	1	1	1	1	1	1	1
chr17	5363016	5346790	+	RABEP1		5	1	1	1			1	1
chr17	5363016	5350451	+	RABEP1		4	1	1	1			1	1
chr17	5363016	5354359	+	RABEP1		8	1	1	1			1	1
chr10	106579369	106620561	-	SORCS1		1	1	1	1	1	1	1	1
chr10	73396044	73400857	-	ANXA7		2	1					1	1
chr17	5365238	5346790	+	RABEP1		13	1	1	1			1	1	1	1
chr17	5365238	5354359	+	RABEP1		8	1	1	1			1	1
chr17	5368468	5338019	+	RABEP1		3	1					1	1
chr17	5368468	5346790	+	RABEP1		8	1	1	1	1	1	1	1	1	1
chr17	5368468	5354359	+	RABEP1		26	1	1	1			1	1
chr17	5368468	5365122	+	RABEP1		20	1	1	1			1	1
chr17	5373454	5346790	+	RABEP1		3	1			1	1	1	1	1	1
chr17	5373454	5354359	+	RABEP1		8	1	1	1			1	1	1	1
chr10	73454412	73479517	-	PPP3CB		26	1	1	1			1	1	1	1
chr17	5378232	5361208	+	RABEP1		2	1	1	1			1	1	1
chr17	5404099	5416682	-	NUP88		3	1	1	1			1	1
chr17	5410703	5416682	-	NUP88		12	1	1	1			1	1
chr17	5460939	5462546	-	DHX33		14	1	1	1			1	1	1	1
chr17	5480054	5482882	-	DERL2		4	1	1	1			1	1	1	1
chr17	54947312	54912666	+	TOM1L1		27	1	1	1			1	1
chr17	54947312	54913748	+	TOM1L1		2	1					1	1
chr17	55000883	54990825	+	STXBP4		1	1	1	1			1	1
chr17	55047154	55031168	+	STXBP4		7	1	1	1			1	1	1	1
chr17	55073076	55007506	+	STXBP4		1	0
chr10	73467553	73479517	-	PPP3CB		9	1	1	1	1	1	1	1	1	1
chr17	55073076	55031168	+	STXBP4		4	1	1	1			1	1
chr17	55081183	55031168	+	STXBP4		14	1	1	1			1	1	1
chr17	55081183	55072900	+	STXBP4		3	1	1	1			1	1	1
chr17	55141367	55031168	+	STXBP4		2	1					1	1
chr17	55401469	55411417	-	MMD		3	1	1	1			1	1	1
chr17	55401469	55414232	-	MMD		1	1	1				1	1	1	1
chr17	55774859	55767335	+	PCTP		2	1	1				1	1
chr17	56814869	56825321	-	C17orf67		1	1	1	1			1	1
chr17	56845809	56844019	+	DGKE		14	1	1	1			1	1
chr17	56848065	56844019	+	DGKE		17	1	1	1			1	1
chr10	73470687	73471613	-	PPP3CB		1	1	1	1			1	1
chr17	56849232	56844019	+	DGKE		10	1	1	1			1	1	1
chr17	56856625	56844019	+	DGKE		1	1	1				1	1	1
chr17	56856625	56847922	+	DGKE		4	1	1	1			1	1
chr17	56856625	56848696	+	DGKE	1	69	1	1	1			1	1
chr17	56858665	56844019	+	DGKE		3	1	1	1			1	1	1
chr17	56858665	56848696	+	DGKE		3	1	1	1			1	1
chr17	56858665	56856512	+	DGKE		1	1	1	1			1	1
chr17	56862251	56844019	+	DGKE		2	1	1	1			1	1
chr17	56862251	56847922	+	DGKE		10	1	1	1			1	1	1	1
chr17	56862251	56848696	+	DGKE		9	1	1	1			1	1
chr10	73471468	73479517	-	PPP3CB		1	0
chr17	56901419	56904488	-	TRIM25		3	1	1				1	1
chr1	75734871	75728401	+	ACADM		1	1	1	1			1	1
chr1	75734871	75732644	+	ACADM		7	1	1	1			1	1
chr1	75740110	75728401	+	ACADM		6	1	1	1			1	1
chr1	75740110	75734791	+	ACADM		1	1	1	1			1	1
chr1	75749559	75739980	+	ACADM		11	1	1	1			1	1
chr1	75750546	75728401	+	ACADM		5	1	1	1			1	1
chr1	75750546	75732644	+	ACADM		12	1	1	1			1	1	1
chr1	75750546	75739980	+	ACADM	1	88	1	1	1			1	1	1
chr1	75750546	75745806	+	ACADM		25	1	1	1			1	1
chr10	73474919	73479517	-	PPP3CB		10	1	1	1			1	1	1
chr1	75750891	75728401	+	ACADM		1	0
chr17	57616084	57401379	+	MSI2		3	1					1	1
chr17	58210659	58213869	-	MKS1		1	1					1	1
chr1	75822581	75803731	+	MSH4		1	1	1	1			1	1
chr17	58306342	58307941	-	TSPOAP1		2	0
chr17	58458768	58480267	-	HSF5		1	1					1		1	1
chr17	586270	601896	-	VPS53		2	1	1	1			1	1
chr17	586270	628231	-	VPS53		5	1	1	1			1	1	1	1
chr17	586270	631628	-	VPS53		1	1					1
chr17	586270	661895	-	VPS53		1	1					1		1
chr10	73504850	73505426	-	USP54		1	1	1	1			1	1
chr17	58709990	58694931	+	RAD51C		11	1	1	1			1	1	1	1
chr17	58709990	58703196	+	RAD51C		2	1	1	1			1	1	1	1
chr17	58720812	58694931	+	RAD51C		3	1					1	1
chr17	58724100	58696693	+	RAD51C		4	1	1				1	1	1
chr17	58965893	58955649	+	PPM1E		1	1	1	1			1	1
chr17	58972925	58955649	+	PPM1E		8	1	1	1			1	1
chr17	58972925	58965694	+	PPM1E		4	1	1	1			1	1	1
chr17	58972925	58969539	+	PPM1E		4	1	1	1			1	1	1
chr17	58999381	59017424	-	TRIM37		8	1	1	1			1	1
chr17	58999381	59041898	-	TRIM37		1	1					1	1
chr10	73516375	73530835	-	USP54		2	0
chr17	58999381	59084089	-	TRIM37		2	1	1	1			1	1
chr17	59012328	59017424	-	TRIM37		8	1	1	1			1	1	1
chr17	59012328	59070947	-	TRIM37		2	1	1				1	1	1
chr17	59015610	59017424	-	TRIM37		2	1	1	1			1	1	1	1
chr17	59028415	59064405	-	TRIM37		1	1					1	1
chr17	59028415	59070947	-	TRIM37		1	1					1
chr17	59028415	59088407	-	TRIM37		1	1	1	1
chr17	59031896	59057054	-	TRIM37		2	1					1
chr17	59041813	59057054	-	TRIM37		17	1	1	1			1	1
chr17	59041813	59062648	-	TRIM37		3	1	1	1			1	1
chr10	73516375	73539593	-	USP54		1	1					1
chr17	59041813	59064405	-	TRIM37		1	1					1	1
chr17	59041813	59070947	-	TRIM37		6	1	1	1			1	1
chr17	59041813	59081219	-	TRIM37		2	1	1	1			1	1	1	1
chr17	59041813	59084089	-	TRIM37		6	1	1	1			1	1	1
chr17	59047683	59051328	-	TRIM37		1	1	1	1			1		1	1
chr17	59047683	59057054	-	TRIM37		11	1	1	1			1	1
chr17	59047683	59062648	-	TRIM37		2	1	1	1			1	1
chr17	59047683	59070947	-	TRIM37		2	1	1				1	1	1
chr17	59047683	59084089	-	TRIM37		7	1	1	1			1	1
chr17	59047683	59088407	-	TRIM37		2	0
chr10	73529680	73530835	-	USP54		1	1	1	1			1	1
chr17	59051214	59057054	-	TRIM37		18	1	1	1			1	1
chr17	59051214	59075714	-	TRIM37		1	1	1	1			1	1
chr17	59051214	59081219	-	TRIM37		4	1	1	1			1	1
chr17	59051214	59084089	-	TRIM37		4	1					1	1	1
chr17	59051214	59088407	-	TRIM37		1	1	1	1					1
chr17	59056875	59070947	-	TRIM37		4	1	1	1			1	1	1	1
chr17	59056875	59075714	-	TRIM37		2	1	1	1			1	1
chr17	59056875	59079877	-	TRIM37		1	0
chr17	59056875	59084089	-	TRIM37		8	1					1	1	1
chr17	59056875	59088407	-	TRIM37		3	1	1	1			1	1	1	1
chr10	106611911	106620561	-	SORCS1		9	1	1	1			1	1
chr10	73529680	73539593	-	USP54		2	1	1	1			1	1
chr17	59061032	59084089	-	TRIM37		1	0							1
chr17	59064355	59081219	-	TRIM37		7	1	1	1			1	1	1	1
chr17	59064355	59084089	-	TRIM37		6	1	1	1			1	1
chr17	59070823	59081219	-	TRIM37		5	1	1				1	1	1
chr17	59070823	59084089	-	TRIM37		67	1	1	1			1	1
chr17	59070823	59091340	-	TRIM37		8	1	1	1			1	1
chr17	59070823	59104394	-	TRIM37		1	0
chr17	59075647	59081219	-	TRIM37		1	1	1	1			1	1	1
chr17	59075647	59084089	-	TRIM37		11	1	1	1			1	1	1	1
chr17	59075647	59088407	-	TRIM37		1	1					1	1	1	1
chr10	73534600	73539593	-	USP54		5	1	1	1			1	1
chr17	59075647	59091340	-	TRIM37		5	1					1	1	1
chr17	59079754	59088407	-	TRIM37		4	1	1	1			1	1
chr17	59081097	59088407	-	TRIM37		1	1	1				1		1
chr17	59248785	59245414	+	GDPD1		7	1	1	1			1	1	1
chr17	59257840	59245414	+	GDPD1		14	1	1	1			1	1	1	1
chr17	59257840	59257122	+	GDPD1		1	1	1	1			1	1
chr17	59267174	59245414	+	GDPD1		4	1	1	1			1	1	1	1
chr17	59267174	59257122	+	GDPD1		6	1	1	1			1	1	1	1
chr17	59272836	59234492	+	GDPD1		2	0
chr17	59272836	59245414	+	GDPD1		4	0
chr10	73536269	73539593	-	USP54		12	1	1	1			1	1	1	1
chr17	59272836	59267041	+	GDPD1		1	1	1	1			1	1
chr17	59353526	59353215	+	YPEL2	1	69	1	1	1			1	1	1
chr17	59579879	59570518	+	DHX40		1	0
chr17	59648401	59644276	+	CLTC		1	1					1	1
chr17	59651316	59644276	+	CLTC		2	1	1	1			1	1
chr17	59651316	59647398	+	CLTC		2	1	1	1			1	1
chr17	59656027	59644276	+	CLTC		1	1					1
chr17	59666977	59661443	+	CLTC		1	0
chr17	59682428	59681647	+	CLTC		1	0
chr17	59737543	59731421	+	VMP1		1	1					1		1
chr10	73536269	73545672	-	USP54		2	1			1	1	1	1	1	1
chr17	59738947	59731383	+	VMP1		1	0
chr17	59738947	59731421	+	VMP1	1	126	1	1	1			1	1	1	1
chr17	59765138	59731421	+	VMP1		6	1	1	1			1	1	1	1
chr17	59765138	59735338	+	VMP1		1	0
chr17	59773885	59731421	+	VMP1	1	133	1	1	1			1	1	1	1
chr17	59773885	59735338	+	VMP1		4	1	1				1	1
chr17	59773885	59737453	+	VMP1		8	1	1	1			1	1
chr17	59773885	59738837	+	VMP1		3	1	1	1			1	1
chr17	59773885	59764971	+	VMP1		47	1	1	1			1	1
chr17	59808876	59737453	+	VMP1		13	1	1	1			1	1
chr10	73539444	73543131	-	USP54		8	1	1	1			1	1
chr17	59811786	59731421	+	VMP1		4	1	1	1			1	1	1	1
chr17	59811786	59764971	+	VMP1		2	1	1	1			1	1	1
chr17	59817773	59731421	+	VMP1		22	1	1	1			1	1	1	1
chr17	59817773	59737453	+	VMP1		62	1	1	1			1	1
chr17	59817773	59764971	+	VMP1		14	1	1	1			1	1	1
chr17	59817773	59808796	+	VMP1		3	1	1	1			1	1	1	1
chr17	59838397	59731421	+	VMP1		1	0
chr17	59863664	59878334	-	TUBD1		1	1					1	1
chr17	59866609	59878334	-	TUBD1		1	1	1	1			1	1
chr17	59866609	59881110	-	TUBD1		1	1	1				1	1	1
chr10	73542803	73543131	-	USP54		5	1	1	1			1	1
chr17	59914703	59910562	+	RPS6KB1		23	1	1	1			1	1	1	1
chr17	59926582	59910562	+	RPS6KB1		5	1	1				1	1
chr17	59926582	59912684	+	RPS6KB1		3	1					1
chr17	59936541	59910562	+	RPS6KB1		7	1	1				1	1	1
chr17	59936541	59935193	+	RPS6KB1		1	1	1	1			1	1
chr17	60066209	60067732	-	HEATR6		1	0
chr17	601795	632841	-	VPS53		2	1					1
chr17	601795	699380	-	VPS53		1	0
chr17	60219670	60226231	-	USP32		2	1					1	1
chr17	60236138	60271481	-	USP32		1	1	1	1			1	1
chr10	73545538	73576361	-	USP54		1	1	1	1			1	1	1	1
chr17	60252381	60301704	-	USP32		1	0
chr17	60255175	60271481	-	USP32		2	1					1	1	1
chr17	60255175	60288682	-	USP32		2	1	1	1			1	1
chr17	60265412	60271481	-	USP32		13	1	1	1			1	1	1
chr17	60265412	60288682	-	USP32		2	1	1	1			1	1
chr17	60265412	60294801	-	USP32		49	1	1	1			1	1
chr17	60265412	60301704	-	USP32		1	1	1				1	1
chr17	60265412	60345608	-	USP32		1	1	1	1			1	1
chr17	60269450	60271481	-	USP32		11	1	1	1			1	1
chr17	60288523	60345608	-	USP32		5	1	1	1	1	1	1	1	1	1
chr10	73571421	73576361	-	USP54		21	1	1	1	1	1	1	1	1	1
chr17	60294683	60345608	-	USP32		4	1					1
chr17	60451880	60460787	-	APPBP2		1	1	1	1			1	1
chr17	60451880	60462061	-	APPBP2		1	1	1	1			1	1
chr17	60460663	60461915	-	APPBP2		3	1	1	1			1	1
chr17	60460663	60462061	-	APPBP2		23	1	1	1			1	1	1
chr17	60460663	60466459	-	APPBP2		1	1	1	1			1	1
chr17	60464021	60500487	-	APPBP2		1	1					1	1
chr17	60479148	60494617	-	APPBP2		2	1	1	1			1	1
chr17	60494466	60500487	-	APPBP2		4	1	1	1			1	1
chr17	60633977	60623521	+	PPM1D		2	1	1	1	1		1	1	1	1
chr10	73575512	73576361	-	USP54		13	1	1	1			1	1	1	1
chr17	60648082	60623521	+	PPM1D		6	1	1	1			1	1	1
chr17	60648082	60633853	+	PPM1D		3	1	1	1			1	1
chr17	60656841	60623521	+	PPM1D		2	1	1		1	1	1		1	1
chr17	60656841	60633853	+	PPM1D		1	1	1	1			1	1
chr17	60689761	60679453	+	BCAS3		6	1	1	1			1	1
chr17	60689761	60683982	+	BCAS3		4	1	1	1			1	1
chr17	60709325	60679453	+	BCAS3		26	1	1	1			1	1	1
chr17	60709325	60683982	+	BCAS3		1	1	1	1			1	1	1	1
chr17	60747279	60679453	+	BCAS3		9	1	1	1			1	1
chr17	60747279	60683982	+	BCAS3		1	0							1
chr10	7367649	7370375	-	SFMBT2		6	1	1	1			1	1	1
chr17	60808076	60679453	+	BCAS3		1	1	1				1	1
chr17	60924500	60902620	+	BCAS3		1	1	1	1			1	1	1
chr17	60947352	60679453	+	BCAS3		1	1					1	1
chr17	60947352	60910532	+	BCAS3		1	0
chr17	6095223	6080371	+	WSCD1		4	1	1	1	1	1	1	1	1	1
chr17	6095223	6087990	+	WSCD1		4	1	1	1			1	1
chr17	60990235	60902620	+	BCAS3		1	1	1				1	1
chr17	61040892	61015751	+	BCAS3		2	1	1	1	1	1	1	1	1	1
chr17	61040892	61026866	+	BCAS3		3	1					1	1
chr17	61084564	60679453	+	BCAS3		3	1	1				1	1
chr10	100926019	100923975	+	SLF2		63	1	1	1			1	1
chr10	106611911	106672985	-	SORCS1		8	1	1	1			1	1
chr10	7367649	7381949	-	SFMBT2		21	1	1	1			1	1
chr17	61084564	61026866	+	BCAS3		4	1					1	1
chr17	61084564	61074920	+	BCAS3		31	1	1	1	1	1	1	1	1	1
chr17	61368494	60679453	+	BCAS3		1	1					1	1
chr17	61884901	61919513	-	INTS2		1	1					1	1
chr17	61889786	61891689	-	INTS2		1	1	1	1			1	1
chr17	61889786	61904585	-	INTS2		1	1	1	1			1	1
chr17	61904460	61919513	-	INTS2		4	1	1	1			1	1
chr17	61911520	61925099	-	INTS2		5	1	1				1	1
chr17	61919400	61925099	-	INTS2		10	1	1	1			1	1
chr10	7370281	7381949	-	SFMBT2		3	1	1	1			1	1
chr17	61921725	61925099	-	INTS2		8	1	1	1			1	1
chr17	61960867	61962971	-	MED13		5	1	1	1			1	1
chr17	61960867	61972888	-	MED13		7	1	1	1			1	1
chr17	61960867	61985090	-	MED13		2	1	1	1			1	1
chr17	61965006	61968258	-	MED13		3	1	1	1			1	1
chr17	61965006	61972888	-	MED13		2	1	1	1			1	1
chr17	61972727	61983114	-	MED13		2	1	1	1			1	1
chr17	61972727	61985090	-	MED13		1	1	1	1			1	1
chr17	61982198	61983114	-	MED13		1	1	1	1			1	1	1
chr17	61982198	61985090	-	MED13		3	1	1	1			1	1
chr10	73817023	73824084	-	CAMK2G		35	1	1	1			1	1	1
chr17	61982198	61995365	-	MED13		1	1	1	1	1	1	1	1	1	1
chr17	61984171	61985090	-	MED13		54	1	1	1			1	1	1
chr17	61984171	61987128	-	MED13		2	1	1	1			1	1
chr17	61992540	62011233	-	MED13		3	1	1	1			1	1
chr17	62010550	62033984	-	MED13		1	1	1	1			1	1
chr17	62010550	62035608	-	MED13		20	1	1	1			1	1	1	1
chr17	62010550	62052705	-	MED13		3	1			1		1	1	1	1
chr17	62010550	62063301	-	MED13		13	1					1	1	1	1
chr17	62029541	62035608	-	MED13		25	1	1	1	1		1	1	1
chr17	62029541	62063301	-	MED13		1	1	1	1			1	1
chr10	73819532	73824084	-	CAMK2G		17	1					1	1
chr17	62033787	62035608	-	MED13		48	1	1	1			1	1
chr17	623533	627316	-	VPS53		46	1	1	1			1	1
chr17	623533	628231	-	VPS53		3	1	1	1			1	1	1	1
chr17	623533	631628	-	VPS53		7	1	1	1			1	1
chr17	623533	661895	-	VPS53		5	1	1	1			1	1	1
chr17	623533	710613	-	VPS53		3	1	1				1	1
chr17	63099357	63073943	+	TANC2		14	1	1	1					1
chr17	631550	699380	-	VPS53		4	0
chr17	63194139	63151270	+	TANC2		29	1	1	1
chr17	63200957	63099175	+	TANC2		2	1					1
chr10	73819532	73837511	-	CAMK2G		1	0
chr17	63200957	63151270	+	TANC2	1	101	1	1	1	1	1
chr17	63200957	63193991	+	TANC2		32	1	1	1	1	1	1	1	1	1
chr17	63238077	63073943	+	TANC2		4	0
chr17	63238077	63151270	+	TANC2	1	76	1	1	1	1	1
chr17	63238077	63193991	+	TANC2		8	1	1	1			1	1	1
chr17	63267873	63151270	+	TANC2		25	0			1
chr17	63319090	63314388	+	TANC2		1	1	1	1			1	1	1	1
chr17	63579943	63578470	+	DCAF7		16	1	1	1			1	1	1
chr17	63583711	63578470	+	DCAF7		1	1	1	1			1	1
chr17	63585328	63578470	+	DCAF7		1	1	1	1			1	1	1
chr10	74074903	74070670	+	VCL		2	1	1	1			1	1	1	1
chr17	63657907	63646034	+	MAP3K3		1	1	1	1	1	1	1	1	1	1
chr17	63667060	63646034	+	MAP3K3		5	1					1	1	1	1
chr17	63681899	63652557	+	MAP3K3		1	0
chr17	63751940	63752799	-	CCDC47		1	1	1	1			1	1
chr17	63760914	63764847	-	CCDC47		2	1	1	1			1	1	1	1
chr17	63760914	63766194	-	CCDC47		20	1	1	1			1	1	1
chr17	63764016	63766194	-	CCDC47		13	1	1	1			1	1
chr17	63800617	63792412	+	DDX42		2	1	1	1			1	1
chr17	63806654	63792412	+	DDX42		1	1	1	1			1	1
chr17	63809659	63792412	+	DDX42		1	1	1	1			1	1
chr10	74398579	74394141	+	ADK		2	1	1	1	1	1	1	1	1	1
chr17	63809659	63805071	+	DDX42		4	1	1	1			1	1
chr17	64052780	64053371	-	ERN1		2	1	1	1			1	1
chr1	76412417	76313805	+	ST6GALNAC3		3	1	1	1			1	1	1	1
chr17	64171100	64188415	-	TEX2		50	1	1	1			1	1
chr17	64171100	64188436	-	TEX2		8	1	1	1			1	1
chr17	64212574	64214242	-	TEX2		34	1	1	1	1	1	1	1	1	1
chr17	64341634	64352463	-	PECAM1		2	1					1	1	1
chr17	64502162	64504318	-	DDX5		1	0
chr17	64522895	64519321	+	CEP95		2	1	1	1			1	1
chr17	64526200	64519321	+	CEP95		33	1	1				1	1
chr10	74525426	74394141	+	ADK		1	1					1	1	1	1
chr17	64526200	64522702	+	CEP95		1	1					1	1
chr17	64529427	64519321	+	CEP95		2	1	1	1			1	1
chr17	64529427	64522702	+	CEP95		1	1	1	1			1	1
chr17	64534737	64519321	+	CEP95		7	1	1	1			1	1
chr17	64534737	64521402	+	CEP95		3	1	1	1			1
chr17	64534737	64531890	+	CEP95		1	0
chr17	64561500	64571956	-	SMURF2		1	1	1	1			1	1	1
chr17	64561500	64578576	-	SMURF2		1	1	1	1			1	1	1	1
chr17	64571798	64583544	-	SMURF2		2	1	1	1			1	1	1
chr17	64571798	64586170	-	SMURF2		12	1	1	1			1	1
chr10	74600493	74394141	+	ADK		13	1	1				1	1	1
chr17	64571798	64591149	-	SMURF2		7	1	1	1			1	1
chr17	64591084	64606640	-	SMURF2		5	1	1				1	1
chr17	64754005	64762710	-	ARHGAP27P1-BPTFP1-KPNA2P3		1	1					1	1
chr17	65053502	65053728	-	GNA13		8	1	1	1			1	1
chr17	653291	661895	-	VPS53		5	1	1	1	1		1	1	1	1
chr17	653291	699380	-	VPS53		45	1	1	1			1	1
chr17	653291	710613	-	VPS53		9	1	1	1			1	1
chr17	65549520	65558736	-	AC004805.1,AXIN2		11	1	1	1			1	1	1	1
chr17	65557806	65558736	-	AC004805.1,AXIN2		12	1	1	1			1	1	1
chr17	65689129	65750724	-	CEP112		36	1	1	1			1	1	1
chr10	74670269	74394141	+	ADK		1	0
chr17	65743068	65750724	-	CEP112		45	1	1	1			1	1	1	1
chr17	65851804	65961598	-	CEP112		3	1					1	1	1
chr17	6589779	6600458	-	KIAA0753		2	1	1	1			1	1
chr17	65902152	65961598	-	CEP112		6	1					1	1	1
chr17	65902152	66070001	-	CEP112		4	1					1		1
chr17	65902152	66096632	-	CEP112		1	1	1						1	1
chr17	65961463	66070001	-	CEP112		4	1					1	1	1
chr17	65961463	66096632	-	CEP112		4	1					1
chr17	66005690	66030023	-	CEP112		4	1	1	1			1	1	1	1
chr17	66005690	66070001	-	CEP112		7	1	1	1			1	1	1	1
chr10	106618149	106620561	-	SORCS1		10	1	1	1			1	1
chr10	74670269	74589282	+	ADK		3	1					1	1
chr17	66027501	66030023	-	CEP112		10	1	1	1			1	1	1
chr17	66027501	66070001	-	CEP112		6	1					1	1
chr17	66027501	66096632	-	CEP112		5	0
chr17	66053736	66070001	-	CEP112		13	1	1	1			1	1	1
chr17	66053736	66096632	-	CEP112		27	1	1	1			1	1	1
chr17	66062963	66096632	-	CEP112		2	1	1	1			1	1
chr17	66096251	66183307	-	CEP112		5	1	1				1	1	1
chr17	66129746	66183307	-	CEP112		2	1	1				1	1	1
chr17	66175044	66183307	-	CEP112		8	1					1	1	1	1
chr17	661809	699380	-	VPS53		2	0
chr10	74843478	74838683	+	KAT6B		66	1	1	1			1	1
chr17	6620788	6628741	-	KIAA0753		1	1	1	1			1	1	1
chr17	66689047	66687111	+	PRKCA	1	85	1	1	1			1	1	1
chr17	66742760	66732688	+	PRKCA		9	1	1	1			1	1	1
chr17	66742760	66735489	+	PRKCA		2	1	1	1			1	1	1
chr17	66774067	66732688	+	PRKCA		3	1	1	1			1	1
chr17	66788979	66732688	+	PRKCA		1	1	1				1
chr17	67114324	67124014	-	HELZ		14	1	1	1			1	1
chr17	67122970	67149985	-	HELZ		1	1	1				1	1
chr17	67128651	67138114	-	HELZ		2	1					1	1
chr17	67128651	67151224	-	HELZ		3	1	1	1			1	1
chr10	74843478	74842600	+	KAT6B	1	104	1	1	1	1	1	1	1	1	1
chr17	67145743	67151224	-	HELZ		1	1	1	1			1	1
chr17	67151046	67178926	-	HELZ		10	1	1	1			1	1
chr17	67166478	67167796	-	HELZ		3	1	1	1			1	1	1	1
chr17	67166478	67190355	-	HELZ		2	1	1	1			1
chr17	67166478	67195470	-	HELZ		4	1	1	1			1	1	1
chr17	67553617	67532802	+	PITPNC1	1	74	1	1
chr17	67578257	67532802	+	PITPNC1		38	1	1	1			1	1	1	1
chr17	67632238	67532802	+	PITPNC1		6	1	1	1			1	1	1	1
chr17	67875744	67866464	+	BPTF		7	1	1	1			1	1	1
chr17	67875744	67874817	+	BPTF		2	1	1	1			1	1
chr10	74960078	74838683	+	KAT6B		1	1					1	1
chr17	67894165	67891844	+	BPTF		14	1	1				1	1
chr17	67903918	67891844	+	BPTF		4	1	1	1			1	1
chr17	67913187	67910877	+	BPTF		2	1	1	1			1	1	1
chr17	67918838	67909582	+	BPTF		5	1	1	1			1	1
chr17	67920143	67903789	+	BPTF		1	1					1
chr17	67922990	67910877	+	BPTF		49	1	1	1			1	1
chr17	67922990	67920015	+	BPTF		2	1	1	1			1	1
chr17	67924589	67909582	+	BPTF		1	1					1
chr17	67924589	67910877	+	BPTF		17	1	1	1			1	1
chr17	67924589	67922840	+	BPTF		1	1					1		1
chr10	74979339	74959970	+	KAT6B		1	1					1	1
chr17	67929487	67928355	+	BPTF		17	1	1	1			1	1	1	1
chr17	67932019	67924547	+	BPTF		2	1					1
chr17	67932019	67928355	+	BPTF		49	1	1	1			1	1	1
chr17	67940656	67909582	+	BPTF		1	1					1
chr17	67940656	67910877	+	BPTF		3	1	1	1			1	1
chr17	67944372	67910877	+	BPTF		17	1	1	1			1	1
chr17	67948306	67928355	+	BPTF		1	1					1
chr17	67948306	67944150	+	BPTF		2	1					1
chr17	67948306	67945409	+	BPTF		59	1	1	1			1	1
chr17	67948306	67947726	+	BPTF		2	1					1
chr10	74989112	74959970	+	KAT6B		5	1	1	1			1	1	1	1
chr17	67964404	67945409	+	BPTF		10	1	1	1			1	1
chr17	67975958	67886128	+	BPTF		1	1	1	1			1	1	1
chr17	67975958	67945409	+	BPTF	1	111	1	1	1			1	1
chr17	68307711	68306943	+	ARSG		4	1	1	1			1	1
chr17	68444493	68452992	-	WIPI1		1	1	1				1	1	1
chr17	68450728	68452992	-	WIPI1		1	1	1				1	1	1	1
chr17	68524958	68522756	+	PRKAR1A		5	1	1	1			1	1
chr17	68530001	68525754	+	PRKAR1A		2	1					1	1
chr17	69112183	69133867	-	ABCA6		1	1	1	1			1	1
chr17	69112183	69140748	-	ABCA6		2	1	1	1			1	1
chr10	74989112	74969660	+	KAT6B		49	1	1	1	1	1	1	1	1	1
chr17	69117898	69125035	-	ABCA6		1	1	1	1			1	1	1
chr17	69155019	69155925	-	ABCA10		29	1	1	1			1	1
chr17	69155019	69179008	-	ABCA10		22	1					1	1
chr17	69214704	69227285	-	ABCA10		4	1	1	1			1	1
chr17	69214704	69228860	-	ABCA10		3	1	1	1			1	1
chr17	69273943	69284072	-	ABCA5		14	1	1	1			1	1
chr17	69273943	69287751	-	ABCA5		2	1					1	1
chr17	69273959	69284072	-	ABCA5		34	1	1	1			1	1
chr17	69273959	69287751	-	ABCA5		1	1	1	1			1	1
chr17	69289177	69302906	-	ABCA5		12	1	1	1			1	1
chr10	74989112	74970020	+	KAT6B		1	1	1	1			1	1	1
chr17	69294655	69302906	-	ABCA5		3	1					1
chr1	77068843	77068084	+	AL035409.1		6	1	1	1			1	1
chr1	77122275	77210489	-	PIGK		2	1	1	1			1	1
chr1	77154449	77169395	-	PIGK		15	1	1	1			1	1	1	1
chr1	77154449	77210489	-	PIGK		6	1	1	1			1	1	1
chr17	72220646	72221873	-	SOX9-AS1		2	1	1	1			1	1
chr17	7228969	7229274	-	DVL2		2	0
chr17	72947731	73031714	-	SLC39A11		1	0							1
chr1	77297947	77286941	+	AK5	1	87	1	1	1			1	1	1
chr17	73203793	73203000	+	COG1		4	1	1	1			1	1
chr10	74989112	74972507	+	KAT6B		13	1	1	1			1	1	1	1
chr17	7321865	7322866	-	NEURL4		1	1	1	1			1	1
chr17	73236995	73235476	+	C17orf80		36	1	1	1			1	1
chr17	73243003	73235476	+	C17orf80		6	1	1	1			1	1
chr1	77340568	77286941	+	AK5		51	1	1	1			1	1	1
chr1	77340568	77293793	+	AK5		4	0							1
chr1	77417715	77286941	+	AK5		30	0
chr1	77417715	77293793	+	AK5		3	0
chr1	77486352	77286941	+	AK5		10	0
chr17	7499491	7499039	+	POLR2A		19	1	1	1			1	1
chr17	75146666	75148671	-	JPT1		1	1	1	1			1	1	1
chr10	74989112	74975399	+	KAT6B		1	1	1	1			1	1	1
chr17	75242336	75243570	-	GGA3		14	1	1	1			1	1
chr17	75321659	75326020	-	GRB2		3	1	1	1			1	1
chr1	77536038	77286941	+	AK5		3	1					1
chr1	77536038	77535847	+	AK5		1	1					1
chr1	77576068	77579628	-	ZZZ3		1	1	1	1			1	1
chr1	77580998	77633405	-	ZZZ3		1	1	1	1			1	1
chr17	75813878	75812112	+	UNK		2	1	1	1			1	1
chr17	75953451	75955947	-	ACOX1		1	1	1	1			1	1
chr17	75955566	75955947	-	ACOX1		5	1	1	1			1	1
chr17	76047906	76057543	-	SRP68		1	1	1	1			1	1	1
chr10	106652382	106679734	-	SORCS1		1	1					1	1	1
chr10	74989112	74977316	+	KAT6B		2	1	1	1	1	1	1	1	1	1
chr17	76094414	76101863	-	EXOC7		1	1	1	1			1	1
chr17	76097796	76098018	-	EXOC7		2	1	1	1			1	1
chr17	76287192	76287897	-	QRICH2		2	1	1	1			1	1
chr17	76287192	76290077	-	QRICH2		22	1	1	1			1	1
chr17	76287192	76304941	-	QRICH2		24	1	1	1			1	1
chr17	76291015	76294021	-	QRICH2		8	1	1	1			1	1
chr1	77631850	77633405	-	ZZZ3		18	1	1	1			1	1	1	1
chr1	77631850	77641655	-	ZZZ3	1	81	1	1	1			1	1	1	1
chr17	76742273	76740957	+	MFSD11		1	1	1	1			1	1
chr10	75151106	75150514	+	SAMD8		14	1	1	1			1	1	1	1
chr17	76769871	76738282	+	MFSD11		1	1					1
chr17	76776541	76741969	+	MFSD11		2	1	1	1			1	1
chr17	76776541	76754047	+	MFSD11		1	1	1				1	1
chr17	76776541	76767386	+	MFSD11		12	1	1	1			1	1
chr17	76906187	76882151	+	MGAT5B		4	1	1	1			1	1
chr17	76940848	76940402	+	MGAT5B		1	1	1	1			1	1
chr17	769869	770157	-	GLOD4		1	1					1		1
chr1	77701369	77725762	-	USP33		2	1	1	1			1	1
chr1	77711747	77714783	-	USP33		25	1	1	1			1	1
chr1	77711747	77715868	-	USP33		24	1	1	1			1	1
chr10	75164740	75150514	+	SAMD8		5	1	1	1			1	1	1
chr1	77711747	77725762	-	USP33		3	1	1	1			1	1
chr1	77711747	77730731	-	USP33		2	1					1	1
chr1	77711747	77736158	-	USP33		6	1	1	1			1	1
chr1	77713200	77714783	-	USP33		2	1	1	1			1	1
chr1	77717867	77718641	-	USP33		18	1	1	1			1	1	1
chr1	77717867	77725762	-	USP33	1	95	1	1	1			1	1
chr1	77723331	77725762	-	USP33		1	1					1	1
chr1	77725622	77736158	-	USP33		2	1	1	1			1	1
chr1	77725622	77739417	-	USP33		1	1	1	1			1	1
chr1	77728295	77739417	-	USP33		1	1					1	1
chr10	75168658	75150514	+	SAMD8		10	1	1	1	1	1	1	1	1	1
chr1	77729860	77736158	-	USP33		5	1	1	1			1	1
chr1	77729860	77739417	-	USP33		2	1	1	1			1	1
chr17	77402703	77402059	+	SEPT9		35	1	1	1	1	1	1	1	1	1
chr1	7778169	7777160	+	VAMP3	1	110	1	1	1			1	1
chr17	78031842	78004170	+	TNRC6C		64	1	1	1	1	1	1	1	1	1
chr17	78051448	78031516	+	TNRC6C		3	1	1		1	1	1	1	1	1
chr17	78051448	78048845	+	TNRC6C		3	1					1	1
chr17	78067923	78064722	+	TNRC6C		1	1	1	1			1	1
chr1	77807101	77783238	+	MIGA1		1	1	1	1			1	1
chr1	77807101	77801331	+	MIGA1		30	1	1	1			1	1
chr10	75176216	75150514	+	SAMD8		8	1	1	1			1	1
chr1	77807101	77803270	+	MIGA1		3	1	1	1			1	1
chr17	78071165	78064722	+	TNRC6C		4	0
chr17	78071165	78067757	+	TNRC6C		3	1	1	1			1	1	1
chr17	78083166	78073037	+	TNRC6C		2	1	1	1			1	1
chr17	78083166	78079395	+	TNRC6C		9	1	1	1			1	1
chr17	78087093	78077185	+	TNRC6C		1	0
chr17	78087093	78079395	+	TNRC6C		11	1	1	1			1	1
chr17	78087093	78086503	+	TNRC6C		46	1	1	1			1	1
chr17	78093763	78079395	+	TNRC6C		7	1	1				1	1	1
chr17	78093763	78086503	+	TNRC6C		8	1	1	1			1	1
chr10	76058783	76036008	+	LRMDA		5	1	1	1			1	1	1
chr17	78093763	78091440	+	TNRC6C		7	1	1	1			1	1	1
chr17	78093763	78092933	+	TNRC6C		7	1	1	1			1	1	1	1
chr17	78097861	78083047	+	TNRC6C		1	1					1	1
chr1	77813867	77803270	+	MIGA1		3	1	1	1			1	1
chr1	77815231	77801331	+	MIGA1	1	89	1	1	1			1	1
chr1	77815231	77813734	+	MIGA1		3	1	1	1			1	1	1	1
chr17	78192785	78190970	+	AFMID		2	1	1	1			1	1
chr17	78398351	78392476	+	PGS1		3	1	1	1			1	1
chr17	78399537	78392476	+	PGS1		2	1	1	1			1	1
chr17	78400855	78400677	+	PGS1		8	1	1	1			1	1
chr10	76887291	77019099	-	KCNMA1		1	0
chr17	78404089	78392476	+	PGS1		1	1	1	1			1	1	1
chr1	77843407	77783238	+	MIGA1		7	1	1	1			1	1
chr1	77843407	77801331	+	MIGA1		20	1	1	1			1	1
chr1	77843407	77813734	+	MIGA1		8	1	1	1			1
chr1	77861322	77843307	+	MIGA1		2	1	1	1			1	1
chr1	77861322	77858938	+	MIGA1		25	1	1	1			1	1
chr1	77864028	77858938	+	MIGA1		17	1	1	1			1	1
chr1	77866391	77801331	+	MIGA1		2	1	1	1			1	1
chr1	77866391	77858938	+	MIGA1		25	1	1	1			1	1
chr17	78692417	78698968	-	CYTH1		1	1	1				1	1
chr10	76909966	76970067	-	KCNMA1		26	1	1	1	1	1	1	1	1	1
chr17	78803385	78803978	-	USP36		1	1	1				1
chr17	788132	783083	+	MRM3		1	1	1	1			1	1
chr17	78818667	78821061	-	USP36		3	1	1	1			1	1
chr17	78818667	78836372	-	USP36		3	1	1	1			1	1
chr17	79077864	79077430	+	ENGASE		37	1	1	1			1	1	1
chr17	7945986	7945728	+	CNTROB		1	1	1	1			1	1
chr1	77949155	77967666	-	FUBP1		1	1	1				1	1	1
chr17	80040270	80039812	+	CCDC40		1	1	1	1			1	1
chr17	80050283	80039812	+	CCDC40		4	1	1	1			1	1
chr17	80050283	80048583	+	CCDC40		47	1	1	1			1	1
chr10	76909966	76974573	-	KCNMA1		1	1					1	1
chr17	80227960	80225837	+	SLC26A11		3	1	1	1			1	1
chr17	80298518	80291628	+	RNF213		1	1					1
chr1	7803848	7786721	+	PER3		1	1					1
chr1	7803848	7793957	+	PER3		4	0
chr1	7803848	7793960	+	PER3		3	1					1
chr17	80857900	80837922	+	RPTOR		1	1			1	1	1		1	1
chr17	80857900	80846473	+	RPTOR		1	1	1	1			1		1	1
chr17	80893865	80891720	+	RPTOR		10	1	1	1			1	1	1
chr17	81086580	81057881	+	BAIAP2		1	1					1
chr17	81086580	81084832	+	BAIAP2		1	1	1	1			1	1	1	1
chr10	76914936	76970067	-	KCNMA1		3	0							1	1
chr17	81565505	81572088	-	NPLOC4		2	1	1	1			1	1
chr17	81596116	81597316	-	NPLOC4		4	1	1	1			1	1	1
chr17	81596116	81600427	-	NPLOC4		2	1	1	1			1	1
chr17	81596116	81606814	-	NPLOC4		1	1	1				1
chr17	81596116	81608822	-	NPLOC4		16	1	1	1			1	1
chr17	81600341	81608822	-	NPLOC4		2	1	1				1
chr17	81604548	81608822	-	NPLOC4		17	1	1	1			1	1
chr17	81606691	81608822	-	NPLOC4		1	1	1				1	1
chr17	81610210	81622278	-	NPLOC4		2	1	1	1			1	1
chr17	81694853	81693654	+	HGS		3	1	1	1			1	1
chr10	106652382	106688338	-	SORCS1		3	1	1	1			1	1
chr10	76914936	76974573	-	KCNMA1		1	0
chr17	81717861	81716812	+	AC139530.2,SLC25A10		1	1					1
chr17	81855142	81855586	-	P4HB		18	1	1	1			1	1
chr17	82157748	82179189	-	CCDC57		4	1	1				1
chr17	82171701	82188419	-	CCDC57		1	1	1	1			1	1
chr17	82178474	82179189	-	CCDC57		7	1	1	1			1	1
chr17	82183774	82188419	-	CCDC57		15	1	1	1			1	1
chr17	82183774	82193830	-	CCDC57		2	1	1	1			1
chr17	82183774	82195364	-	CCDC57		8	1	1	1			1	1
chr17	82183774	82198422	-	CCDC57		2	1	1	1			1	1
chr17	82183774	82201952	-	CCDC57		1	1					1	1
chr10	76944773	76970067	-	KCNMA1	1	71	1	1	1	1	1	1	1	1	1
chr17	82193756	82195364	-	CCDC57		2	1	1				1	1
chr17	8238031	8238629	-	CTC1	1	90	1	1	1			1	1
chr17	8238031	8243148	-	CTC1		3	1	1	1			1	1
chr17	82472698	82459992	+	NARF		5	1	1	1			1	1
chr17	82568201	82563354	+	FOXK2	1	102	1	1	1			1	1	1
chr17	82571870	82563354	+	FOXK2		12	1	1	1			1	1	1
chr17	82587272	82563354	+	FOXK2		1	1	1	1			1	1	1	1
chr17	82766368	82763965	+	TBCD		1	1	1	1			1	1
chr17	82768566	82756165	+	TBCD		5	1	1	1			1	1
chr17	82768566	82763965	+	TBCD		4	1	1	1			1	1
chr10	76944773	76974573	-	KCNMA1		3	1	1	1			1	1	1
chr17	82772507	82756165	+	TBCD		1	1	1	1			1	1
chr17	82772507	82763965	+	TBCD		7	1	1	1			1	1	1	1
chr17	82781721	82756165	+	TBCD		6	1	1				1	1
chr17	82781721	82763965	+	TBCD	1	81	1	1	1	1	1	1	1	1
chr17	82809782	82797757	+	TBCD		1	1					1		1
chr17	82870380	82797757	+	TBCD		1	1	1				1
chr17	82893632	82797757	+	TBCD		1	0
chr17	82893632	82870224	+	TBCD		7	1	1	1			1	1
chr17	82900731	82870224	+	TBCD		6	1	1	1			1	1
chr17	82900731	82884145	+	TBCD		2	1	1	1			1	1
chr10	76944773	77012043	-	KCNMA1		2	1	1	1			1	1
chr17	82903478	82870224	+	TBCD		14	1	1	1			1	1
chr17	82903478	82884145	+	TBCD		14	1	1	1			1	1
chr17	82903478	82900651	+	TBCD		1	1	1	1			1	1
chr17	82906053	82814840	+	TBCD		1	1					1
chr17	82906053	82870224	+	TBCD		1	1	1	1			1	1	1
chr17	82907821	82884145	+	TBCD		1	0
chr17	82909307	82900651	+	TBCD		3	1	1				1	1
chr17	82911789	82870224	+	TBCD		15	1	1	1			1	1
chr17	82911789	82884145	+	TBCD		10	1	1				1
chr17	82911789	82889668	+	TBCD		5	1	1
chr10	76949142	76970067	-	KCNMA1		3	1	1	1			1	1
chr17	82911789	82893547	+	TBCD		1	1	1	1			1	1
chr17	82911789	82900651	+	TBCD		30	1	1	1			1	1
chr17	83005115	83035099	-	B3GNTL1		1	1	1	1					1	1
chr17	83035035	83048785	-	B3GNTL1		7	1	1				1
chr17	83048471	83048785	-	B3GNTL1		2	1	1	1			1		1
chr1	7837149	7793960	+	PER3		1	0
chr1	7837149	7835762	+	PER3		36	1	1	1			1	1
chr17	8460160	8444260	+	NDEL1		3	1	1	1			1	1	1	1
chr17	8493733	8495241	-	MYH10		12	1	1	1			1	1
chr17	8504694	8509949	-	MYH10		1	1					1
chr10	76949142	77012043	-	KCNMA1		4	0
chr17	8506318	8509949	-	MYH10		47	1	1	1			1	1
chr17	8508554	8509949	-	MYH10		16	1	1	1			1	1	1
chr17	8518631	8535931	-	MYH10		3	1	1	1			1	1
chr17	8520878	8535931	-	MYH10		1	1	1	1			1	1
chr17	8542107	8554018	-	MYH10		4	1	1	1			1	1
chr17	8552046	8569812	-	MYH10		2	1	1	1			1	1
chr17	8552046	8577338	-	MYH10		7	1	1	1			1	1	1	1
chr17	8569720	8577338	-	MYH10		52	1	1	1			1	1	1
chr17	8589081	8623497	-	MYH10		2	1					1	1
chr17	9600183	9586698	+	CFAP52		2	1					1	1
chr10	76953801	77079550	-	KCNMA1		1	0
chr17	9600183	9598234	+	CFAP52		2	1					1	1
chr17	9693230	9656403	+	USP43		1	1	1	1			1	1
chr17	9693230	9674891	+	USP43		3	1	1	1			1	1
chr17	9712132	9709956	+	USP43		2	1	1	1			1	1
chr17	9925476	9926769	-	GAS7		2	1	1	1			1	1
chr17	9925476	9946983	-	GAS7		2	1	1	1					1
chr17	9925476	9959255	-	GAS7		1	0							1
chr17	9926641	9959255	-	GAS7		3	0
chr17	9940126	9946983	-	GAS7	1	130	1	1	1			1	1
chr17	9940126	9959255	-	GAS7		3	1					1	1
chr10	76969974	76974573	-	KCNMA1		11	1	1	1			1	1
chr17	9943121	9959255	-	GAS7		1	0							1
chr18	10759482	10773629	-	PIEZO2		32	1					1
chr18	1159398	1133843	+	AP005328.1		1	1					1
chr18	1162853	1133843	+	AP005328.1		7	0
chr18	11753945	11752853	+	GNAL		2	1	1	1			1	1
chr18	11868663	11862395	+	GNAL		1	1	1	1			1	1
chr18	11876688	11862395	+	GNAL		2	1	1	1			1	1	1
chr18	12353005	12356831	-	AFG3L2		20	1	1	1			1	1
chr18	12356694	12360051	-	AFG3L2		4	1	1	1			1	1	1
chr18	12356694	12363856	-	AFG3L2		1	1					1	1	1
chr10	76969974	77012043	-	KCNMA1		1	0
chr18	12358670	12360051	-	AFG3L2		2	1	1				1	1
chr18	12358670	12371691	-	AFG3L2		1	1	1				1	1
chr18	12366965	12370926	-	AFG3L2		4	1					1	1
chr18	12366965	12371691	-	AFG3L2		27	1	1	1			1	1	1
chr18	12421629	12420325	+	PRELID3A		1	1	1	1			1	1
chr18	12463351	12464958	-	SPIRE1		24	1	1	1			1	1
chr18	12463351	12479871	-	SPIRE1		3	1	1	1			1	1	1	1
chr18	12463351	12496102	-	SPIRE1		4	1	1	1			1	1
chr18	12479699	12506641	-	SPIRE1		6	1					1	1
chr18	12479699	12635096	-	SPIRE1		1	0
chr10	76969974	77019099	-	KCNMA1		1	1	1	1			1	1
chr18	12485959	12506641	-	SPIRE1		2	0
chr18	12485959	12512531	-	SPIRE1		1	0
chr18	12485959	12635096	-	SPIRE1		2	0
chr18	12493072	12496102	-	SPIRE1		9	1	1	1	1	1	1	1	1	1
chr18	12493072	12506641	-	SPIRE1		2	1	1	1			1	1
chr18	12493072	12546904	-	SPIRE1		16	1	1	1			1	1	1	1
chr18	12506477	12506641	-	SPIRE1		5	1	1	1			1	1
chr18	12506477	12512531	-	SPIRE1		2	1	1	1	1		1	1	1	1
chr18	12506477	12535601	-	SPIRE1		4	1	1	1			1	1	1
chr18	12506477	12546904	-	SPIRE1		5	1	1	1			1	1	1
chr10	106688192	106709341	-	SORCS1		22	1	1	1	1	1	1	1	1	1
chr10	76969974	77027891	-	KCNMA1		9	1	1	1			1	1
chr18	12506477	12635096	-	SPIRE1		21	1					1	1	1	1
chr18	12535476	12546904	-	SPIRE1		2	1	1	1	1	1	1	1	1	1
chr18	12535476	12635096	-	SPIRE1		27	1	1	1	1	1	1	1	1	1
chr18	12546674	12546904	-	SPIRE1		1	1					1	1
chr18	13008631	12999421	+	CEP192		1	1	1	1			1	1
chr18	13019206	12999421	+	CEP192	1	82	1	1	1			1	1
chr18	13019206	13012973	+	CEP192		1	1	1	1			1	1	1
chr18	13030608	12999421	+	CEP192		47	1	1	1			1	1
chr18	13059312	12999421	+	CEP192		5	1	1	1			1	1
chr10	76969974	77079550	-	KCNMA1		4	0
chr18	13059312	13029663	+	CEP192		3	1	1	1			1	1	1
chr18	13059312	13048859	+	CEP192		25	1	1	1			1	1
chr18	13073185	13048859	+	CEP192		3	1	1	1			1	1
chr18	13100512	13067831	+	CEP192		1	1	1	1			1	1
chr18	13103588	13099476	+	CEP192		5	1	1	1			1	1
chr18	13117643	12999421	+	CEP192		5	1					1	1
chr18	13387762	13278105	+	LDLRAD4		21	1	1		1	1	1	1
chr18	13387762	13387341	+	LDLRAD4		5	1	1				1
chr18	13438384	13278105	+	LDLRAD4		16	1	1				1	1
chr18	13438384	13387341	+	LDLRAD4		13	1	1	1			1	1
chr10	77008185	77027891	-	KCNMA1		3	0
chr18	13681605	13682105	-	FAM210A		52	1	1	1			1	1
chr18	13731934	13731476	+	RNMT		2	1	1	1			1	1
chr18	13754147	13730627	+	RNMT		27	1	1	1			1	1
chr18	13754147	13731476	+	RNMT		2	0
chr18	14077329	14085076	-	ZNF519		5	1	1	1			1	1
chr18	14764090	14754899	+	ANKRD30B		1	0
chr18	14764090	14763686	+	ANKRD30B		1	1					1	1
chr18	166819	163308	+	USP14		1	1	1				1	1
chr1	81907230	81836885	+	ADGRL2		22	1	1	1			1	1
chr1	81953025	81942034	+	ADGRL2		9	0
chr10	77011967	77027891	-	KCNMA1		10	1	1	1			1	1
chr1	81953025	81942969	+	ADGRL2		13	0							1	1
chr1	81956060	81936728	+	ADGRL2		1	1					1	1	1
chr1	81956060	81950189	+	ADGRL2		3	1	1	1			1	1
chr1	81966609	81950189	+	ADGRL2		1	1					1	1
chr1	81971918	81968026	+	ADGRL2		1	1	1	1			1	1
chr1	81985355	81966058	+	ADGRL2		1	1					1	1
chr18	199316	192842	+	USP14		2	1	1	1			1
chr18	199316	196637	+	USP14		23	1	1	1			1	1
chr18	203190	196637	+	USP14		18	1	1	1			1	1
chr18	204692	196637	+	USP14		38	1	1	1			1	1
chr10	77011967	77039637	-	KCNMA1		2	0							1	1
chr18	20966917	20970513	-	ROCK1		1	1	1	1			1	1
chr18	20966917	20982832	-	ROCK1		1	1					1
chr18	20966917	20992937	-	ROCK1		4	1	1	1			1	1
chr18	20966917	21044186	-	ROCK1		2	1	1	1			1	1
chr18	20968772	20992937	-	ROCK1		1	1	1	1			1	1
chr18	20979910	20984535	-	ROCK1		3	1	1	1			1	1
chr18	20979910	20987110	-	ROCK1		1	1					1	1
chr18	20979910	20991326	-	ROCK1		2	1					1	1
chr18	20979910	20992937	-	ROCK1		13	1	1	1			1	1
chr18	20979910	21008194	-	ROCK1		6	1	1	1			1	1
chr10	77011967	77079550	-	KCNMA1		5	0
chr18	20982763	20992937	-	ROCK1		3	1	1	1			1	1
chr18	20986950	20992937	-	ROCK1		1	1	1	1			1	1
chr18	20991176	20992937	-	ROCK1		2	1	1	1			1	1
chr18	20991176	21008194	-	ROCK1		1	1					1
chr18	20991176	21020239	-	ROCK1	1	111	1	1	1			1	1
chr18	20991176	21028935	-	ROCK1		1	1					1	1
chr18	20992831	21008194	-	ROCK1		4	0
chr18	20992831	21044186	-	ROCK1		1	1	1
chr18	21006351	21008194	-	ROCK1		27	1	1	1			1	1
chr18	21015431	21044186	-	ROCK1		1	1					1	1
chr10	77027823	77112442	-	KCNMA1		1	0
chr18	21020151	21042709	-	ROCK1		1	1	1	1			1	1	1
chr18	21020151	21044186	-	ROCK1		9	1	1	1			1	1
chr18	21023620	21042709	-	ROCK1		4	1	1	1			1	1	1	1
chr18	21023620	21044186	-	ROCK1		1	1					1	1
chr18	21039472	21044186	-	ROCK1		7	1	1	1			1	1	1	1
chr18	21039472	21070613	-	ROCK1		1	1	1	1			1	1	1
chr18	21045292	21049880	-	ROCK1		1	1	1	1			1	1	1
chr18	21384403	21366027	+	GREB1L		2	1	1	1			1	1
chr18	21395561	21366027	+	GREB1L		2	1	1	1			1	1
chr18	21403994	21366027	+	GREB1L		57	1	1	1	1		1	1	1
chr10	77039528	77079550	-	KCNMA1		24	1	1	1			1	1
chr18	21532473	21566206	-	ESCO1		2	1	1	1			1	1	1
chr18	21532473	21568094	-	ESCO1		1	0							1	1
chr18	21536042	21566206	-	ESCO1		4	1	1	1	1	1	1	1	1	1
chr18	21536042	21568094	-	ESCO1		62	1	1	1	1	1	1	1	1	1
chr18	21536042	21584440	-	ESCO1		1	1	1				1	1
chr18	21539920	21566206	-	ESCO1		2	1	1	1			1	1	1	1
chr18	21539920	21568094	-	ESCO1		1	1					1	1	1
chr18	21560859	21566206	-	ESCO1		3	1	1	1	1		1	1	1	1
chr18	21560859	21568094	-	ESCO1		13	1	1	1			1	1	1
chr18	21560859	21575777	-	ESCO1		6	1	1	1			1	1	1
chr10	77039528	77086593	-	KCNMA1		1	0
chr18	21560859	21584440	-	ESCO1		16	1	1	1			1	1
chr18	21564203	21568094	-	ESCO1		56	1	1	1			1	1	1
chr18	21564203	21584440	-	ESCO1		7	1	1	1			1	1
chr18	21566146	21568094	-	ESCO1		3	1	1	1			1	1
chr18	21656861	21659343	-	ABHD3		3	1	1	1			1	1
chr18	21656861	21664230	-	ABHD3		2	1	1	1			1	1
chr18	21656861	21683965	-	ABHD3		1	1					1
chr18	21768752	21765772	+	MIB1		2	1	1	1			1	1	1
chr18	21773728	21765772	+	MIB1		2	1	1	1			1	1
chr18	21779685	21765772	+	MIB1	1	133	1	1	1			1	1	1	1
chr10	77039528	77090510	-	KCNMA1		3	1	1	1			1	1	1
chr18	21779685	21773624	+	MIB1		42	1	1	1			1	1
chr18	21779685	21778103	+	MIB1		21	1	1	1			1	1
chr18	21791557	21765772	+	MIB1		17	1	1	1			1	1	1	1
chr18	21798228	21765772	+	MIB1		8	1	1	1			1	1
chr18	21799974	21765772	+	MIB1		31	1	1	1			1	1	1
chr18	21804014	21765772	+	MIB1		46	1	1	1			1	1	1
chr18	21804014	21791374	+	MIB1		12	1	1	1			1	1	1
chr18	21819646	21765772	+	MIB1	1	98	1	1	1	1	1	1	1	1	1
chr18	21819646	21791374	+	MIB1		1	1	1	1			1	1
chr18	21847125	21791374	+	MIB1		1	1					1
chr10	106699214	106709341	-	SORCS1		62	1	1	1	1	1	1	1	1	1
chr10	77039528	77112442	-	KCNMA1		1	0
chr18	21847125	21838365	+	MIB1		2	1	1	1			1	1
chr18	21849388	21765772	+	MIB1		3	1	1	1			1	1
chr18	21858646	21838365	+	MIB1		1	1	1	1			1	1
chr18	21858646	21849196	+	MIB1		4	1	1	1			1	1
chr18	223440	226901	-	THOC1		1	1					1	1
chr18	224924	226901	-	THOC1		1	1					1	1
chr18	22949713	22936754	+	RBBP8		2	1	1	1			1	1	1
chr18	22984990	22968806	+	RBBP8		1	1	1	1			1	1	1	1
chr18	22984990	22975153	+	RBBP8		20	1	1	1			1	1
chr18	22996462	22984886	+	RBBP8		2	1					1
chr10	77073097	77079550	-	KCNMA1		15	1	1	1			1	1
chr18	22996462	22990937	+	RBBP8		6	1	1	1			1	1
chr18	22996462	22992748	+	RBBP8		1	1	1	1			1	1
chr18	23001729	22975153	+	RBBP8		52	1	1	1			1	1
chr18	23001729	22982218	+	RBBP8		13	1	1	1			1	1	1
chr18	23001729	22989221	+	RBBP8		32	1	1	1			1	1
chr18	23001729	22990937	+	RBBP8		5	1	1	1			1	1
chr18	23001729	22992748	+	RBBP8		1	1					1	1	1
chr18	23022270	23001586	+	RBBP8		1	0
chr18	23237245	23213977	+	CABLES1		5	1					1	1	1
chr18	23237245	23234608	+	CABLES1		36	1	1	1	1	1	1	1	1	1
chr10	77073097	77090510	-	KCNMA1		2	1	1	1	1	1	1	1	1	1
chr18	23253936	23234608	+	CABLES1		1	1					1		1	1
chr18	23309680	23352289	-	TMEM241		1	1					1	1
chr18	23309680	23373763	-	TMEM241		44	1	1	1	1	1	1
chr18	23352196	23373763	-	TMEM241		9	1	1	1	1	1	1	1	1	1
chr18	23352196	23385067	-	TMEM241		1	0
chr18	23352196	23399647	-	TMEM241		2	0
chr18	23352196	23421444	-	TMEM241		1	1					1
chr18	23466276	23462964	+	RIOK3		1	1	1	1			1	1	1	1
chr18	23509279	23507985	+	C18orf8		4	1	1	1			1	1	1
chr18	23519174	23507985	+	C18orf8		3	1	1	1			1	1
chr10	77073097	77112442	-	KCNMA1		3	1	1	1			1	1
chr18	23519174	23515856	+	C18orf8		8	1	1	1			1	1
chr18	23526765	23507985	+	C18orf8		1	1	1	1			1	1
chr18	23526765	23515856	+	C18orf8		2	1	1	1			1	1
chr18	23864883	23842395	+	LAMA3		1	0
chr18	24069271	24064140	+	TTC39C		23	1	1	1			1	1	1
chr18	24083081	24064140	+	TTC39C	1	116	1	1	1			1	1	1	1
chr18	24118232	24064140	+	TTC39C		2	1	1	1			1	1
chr18	24125550	24118125	+	TTC39C		3	1	1				1	1
chr18	24125550	24123834	+	TTC39C		22	1	1	1			1	1	1
chr10	77073097	77184916	-	KCNMA1		2	1					1	1	1
chr18	24128983	24123834	+	TTC39C		1	1					1
chr18	24130417	24064140	+	TTC39C		3	1	1	1			1	1
chr18	24130417	24082913	+	TTC39C		15	1	1	1			1	1
chr18	24143413	24143091	+	CABYR	1	79	1	1	1			1	1	1
chr18	24165065	24166702	-	OSBPL1A		1	0
chr18	24165065	24172483	-	OSBPL1A		14	1	1	1			1	1
chr18	24165065	24178195	-	OSBPL1A		1	0
chr18	24165065	24179835	-	OSBPL1A		1	1	1	1			1	1
chr18	24165065	24239382	-	OSBPL1A		1	0
chr18	24171409	24181279	-	OSBPL1A		1	1	1	1			1	1
chr10	77108481	77184916	-	KCNMA1		1	1	1	1	1	1	1	1	1	1
chr18	24178013	24179835	-	OSBPL1A		45	1	1	1			1	1
chr18	24178013	24181279	-	OSBPL1A		1	1	1	1			1	1
chr18	24178013	24239382	-	OSBPL1A		3	1					1
chr18	24196125	24239382	-	OSBPL1A	1	80	1	1	1			1	1	1
chr18	24196125	24334330	-	OSBPL1A		1	0
chr18	24225042	24239382	-	OSBPL1A	1	72	1	1	1			1	1	1
chr18	24225042	24318809	-	OSBPL1A		1	1					1	1
chr18	24225042	24334330	-	OSBPL1A		6	1	1				1	1
chr18	24225042	24377535	-	OSBPL1A		3	1					1
chr18	24280842	24318809	-	OSBPL1A		3	1	1	1			1	1
chr10	7759890	7769345	-	KIN		2	1	1	1			1	1
chr18	24280842	24334330	-	OSBPL1A		3	1					1	1
chr18	24280842	24341658	-	OSBPL1A		10	1	1	1			1	1
chr18	24280842	24377535	-	OSBPL1A		14	1	1	1			1	1	1
chr18	24303637	24366966	-	OSBPL1A		1	1	1	1			1	1
chr18	24366892	24377535	-	OSBPL1A		9	1	1	1	1	1	1	1	1	1
chr18	25195160	25322187	-	ZNF521		2	1					1	1	1	1
chr18	25224345	25227697	-	ZNF521		8	1	1	1	1	1	1	1	1	1
chr18	25224345	25322187	-	ZNF521		1	1					1	1	1	1
chr18	25224345	25345347	-	ZNF521		1	0
chr18	25322008	25327448	-	ZNF521		13	1	1	1			1	1
chr10	7778838	7780307	-	KIN		3	1	1	1			1	1
chr18	26032399	26057742	-	SS18		2	1	1	1			1	1	1
chr18	26032399	26068557	-	SS18		1	0
chr18	26032399	26078160	-	SS18		7	1	1	1			1	1	1	1
chr18	26032399	26084175	-	SS18		1	0
chr18	26038555	26078160	-	SS18		1	0
chr18	26038555	26087577	-	SS18		1	1	1	1			1	1
chr18	26052624	26078160	-	SS18		6	1	1	1			1	1	1
chr18	26052624	26087577	-	SS18		3	1	1	1			1	1
chr18	26078076	26080423	-	SS18		1	1					1
chr18	26335231	26292246	+	TAF4B		1	1					1
chr10	77853354	77854370	-	DLG5		29	1	1	1			1	1
chr18	26335231	26315229	+	TAF4B		3	1	1				1	1
chr18	26357794	26315229	+	TAF4B		3	1	1				1	1	1
chr18	26476515	26501250	-	KCTD1		7	1	1				1	1
chr18	26710039	26709450	+	AQP4-AS1		1	0
chr18	26764331	26709450	+	AQP4-AS1		7	0
chr18	2698041	2694527	+	SMCHD1		3	1	1	1			1	1
chr18	2700918	2700539	+	SMCHD1		1	1	1	1			1	1
chr18	2707920	2700539	+	SMCHD1		2	1	1	1			1	1	1
chr18	2718434	2718158	+	SMCHD1		3	1	1	1			1	1
chr18	2722663	2688394	+	SMCHD1		1	1	1	1			1		1	1
chr10	78002197	78007866	-	POLR3A		56	1	1	1			1	1
chr18	2739520	2700539	+	SMCHD1		1	1	1	1			1	1
chr18	2747647	2726452	+	SMCHD1		1	0
chr18	2752552	2724899	+	SMCHD1		5	1	1	1			1	1
chr18	2772372	2762105	+	SMCHD1		1	1	1	1			1	1
chr18	2784621	2775734	+	SMCHD1		4	1	1	1			1	1	1
chr18	27963357	28013909	-	CDH2		2	1	1	1			1	1	1
chr18	2796521	2732265	+	SMCHD1		1	1	1				1	1
chr18	27982944	27993637	-	CDH2		3	1	1	1			1	1
chr18	27982944	28013909	-	CDH2		2	1	1	1	1	1	1	1	1	1
chr18	27982944	28147784	-	CDH2		1	1					1	1
chr10	106730050	106829673	-	SORCS1		2	0							1
chr10	78004716	78007866	-	POLR3A		4	1					1	1
chr18	28002997	28013909	-	CDH2		5	1	1	1	1	1	1	1	1	1
chr18	28002997	28147784	-	CDH2		3	1					1
chr18	2892486	2890561	+	EMILIN2		5	1	1	1			1	1	1
chr18	2951055	2960849	-	LPIN2		5	1	1	1			1	1
chr1	83096977	82996715	+	LINC01362		1	0
chr18	31630959	31645479	-	B4GALT6		1	1					1	1	1
chr18	31630959	31658089	-	B4GALT6		18	1	1	1			1	1
chr18	31630959	31666372	-	B4GALT6		7	1	1	1			1	1
chr18	31832084	31839457	-	TRAPPC8		19	1	1	1			1	1
chr18	31839312	31855807	-	TRAPPC8		1	1	1	1			1	1
chr10	7802854	7796121	+	ATP5C1		8	1	1	1			1
chr18	31846716	31852663	-	TRAPPC8		1	1	1	1			1	1
chr18	31852446	31852663	-	TRAPPC8		3	1	1	1			1	1
chr18	31853849	31867476	-	TRAPPC8		3	1	1	1			1	1
chr18	31855660	31871120	-	TRAPPC8		1	1	1	1			1	1	1
chr18	31864627	31890866	-	TRAPPC8		1	1	1	1			1	1
chr18	31864627	31909010	-	TRAPPC8		1	1	1	1			1	1
chr18	31873430	31909760	-	TRAPPC8		3	1	1	1			1	1
chr18	31873430	31917667	-	TRAPPC8		1	1	1	1			1	1
chr18	31897786	31907610	-	TRAPPC8		1	1	1	1			1	1
chr18	31897786	31913522	-	TRAPPC8		2	1	1	1			1	1	1
chr10	7802854	7797047	+	ATP5C1	1	125	1	1	1			1	1
chr18	31897786	31917667	-	TRAPPC8		4	1	1	1			1	1
chr18	31897786	31931523	-	TRAPPC8		2	1	1	1			1	1	1	1
chr18	31907460	31917667	-	TRAPPC8		23	1	1	1			1	1
chr18	32113860	32111754	+	RNF138		52	1	1	1			1	1	1	1
chr18	32124845	32111754	+	RNF138	1	80	1	1	1	1	1	1	1	1	1
chr18	32126800	32111754	+	RNF138		14	1	1	1			1	1	1
chr18	33627070	33605435	+	ASXL3		9	1	1	1
chr18	33627070	33607594	+	ASXL3		15	1	1	1	1		1	1	1	1
chr18	33627070	33626862	+	ASXL3		1	1					1	1	1
chr18	33646353	33607594	+	ASXL3		16	1	1	1	1	1	1	1	1	1
chr10	7802854	7798990	+	ATP5C1		25	1	1	1			1	1	1	1
chr18	33646353	33626862	+	ASXL3		7	1	1	1	1	1	1	1	1
chr18	33646353	33626873	+	ASXL3		2	1	1	1	1	1	1	1
chr18	33670790	33607594	+	ASXL3		1	1	1	1			1	1	1	1
chr18	33671866	33607594	+	ASXL3		17	1	1	1	1		1	1	1	1
chr18	33671866	33626862	+	ASXL3		12	1	1	1					1
chr18	33671866	33641821	+	ASXL3		9	0
chr18	33683568	33605435	+	ASXL3		3	0
chr18	33683568	33607594	+	ASXL3		29	1	1	1	1	1	1	1	1	1
chr18	33683568	33626862	+	ASXL3		33	1	1	1	1				1	1
chr18	33683568	33626873	+	ASXL3		9	1	1	1
chr10	79162133	79118915	+	ZMIZ1		3	1	1	1	1	1	1	1	1	1
chr18	33683568	33641821	+	ASXL3		25	0
chr18	33683568	33644894	+	ASXL3		24	1	1	1			1	1
chr18	33683568	33661616	+	ASXL3		4	1	1	1	1		1	1	1	1
chr18	33883244	33943178	-	NOL4		3	1	1	1			1	1
chr18	34019318	34105160	-	NOL4		2	1					1	1	1	1
chr18	34093465	34105160	-	NOL4		51	1	1	1	1	1	1	1	1	1
chr18	34093465	34130020	-	NOL4		53	1	1	1	1	1	1	1	1	1
chr18	34093465	34183626	-	NOL4		1	0
chr18	34104047	34105160	-	NOL4		3	1	1	1			1	1
chr18	34679592	34513515	+	DTNA		8	0
chr10	79216274	79118915	+	ZMIZ1		6	1	1	1	1	1	1	1	1	1
chr18	34683694	34513515	+	DTNA		1	0
chr18	34683694	34679468	+	DTNA		4	1	1	1			1	1
chr18	34766041	34513515	+	DTNA		9	0
chr18	34766041	34679468	+	DTNA		32	1	1	1			1	1	1	1
chr18	34766041	34755976	+	DTNA		9	1	1	1			1	1	1	1
chr18	34794250	34679468	+	DTNA		17	1			1		1	1	1
chr18	34794250	34755976	+	DTNA	1	87	1	1	1	1	1	1	1	1	1
chr18	34812113	34806219	+	DTNA		1	1	1	1			1	1
chr18	34820915	34794037	+	DTNA		1	0
chr18	34827676	34755976	+	DTNA		9	1					1	1	1	1
chr10	79216274	79162053	+	ZMIZ1		4	1	1	1			1	1	1
chr18	34827676	34794037	+	DTNA		9	1	1	1			1	1
chr18	34827676	34806219	+	DTNA		3	1	1	1	1	1	1	1	1	1
chr18	34848383	34820791	+	DTNA		3	1	1	1			1	1
chr18	34851928	34818164	+	DTNA		1	0							1
chr18	34851928	34820791	+	DTNA		1	1					1
chr18	34875398	34851831	+	DTNA		4	1	1	1			1	1
chr18	34882201	34858285	+	DTNA		1	0
chr18	35102159	35070195	+	MAPRE2		46	1	1	1	1		1	1	1	1
chr18	35102159	35097446	+	MAPRE2		3	1	1	1			1	1	1
chr18	35132190	35070195	+	MAPRE2		1	1					1	1	1
chr10	79216274	79201584	+	ZMIZ1		5	1	1	1	1	1	1	1	1	1
chr18	3534194	3534615	-	DLGAP1		5	1	1	1			1	1	1	1
chr18	3534194	3582248	-	DLGAP1		49	1	1	1			1	1	1	1
chr18	3567490	3582248	-	DLGAP1		43	1	1	1			1	1	1	1
chr18	3567490	3656113	-	DLGAP1		2	1					1	1
chr18	35683598	35677591	+	GALNT1		1	1					1
chr18	3581875	3582248	-	DLGAP1		2	0							1	1
chr18	36026900	36033837	-	RPRD1A	1	97	1	1	1	1	1	1	1	1	1
chr18	36026900	36040865	-	RPRD1A		2	1					1	1
chr18	36111059	36127016	-	SLC39A6		9	1	1	1			1	1
chr18	36146048	36142826	+	ELP2		12	1	1	1			1	1
chr10	80053396	80060933	-	TMEM254-AS1		2	1	1	1			1	1
chr18	36146381	36141137	+	ELP2		2	1	1	1			1	1
chr18	36146381	36142281	+	ELP2		12	1	1	1			1	1
chr18	36159830	36136307	+	ELP2		2	1	1	1			1	1
chr18	36159830	36142281	+	ELP2		4	1					1	1
chr18	36160015	36141137	+	ELP2		20	1	1	1			1	1
chr18	36160015	36142281	+	ELP2		27	1	1	1			1	1
chr18	36164667	36141137	+	ELP2		9	1	1	1			1	1
chr18	36164667	36142281	+	ELP2		6	1	1	1			1	1
chr18	36512543	36355539	+	FHOD3		2	1					1	1
chr18	3656084	3742512	-	DLGAP1		1	0
chr10	80427496	80425866	+	FAM213A		10	1	1	1			1	1
chr18	3656084	3814273	-	DLGAP1		1	0
chr18	36602768	36576451	+	FHOD3		1	1	1	1			1	1
chr18	36625749	36576451	+	FHOD3		1	1	1	1			1	1	1
chr18	36693423	36658075	+	FHOD3		7	1	1	1	1		1	1	1	1
chr18	36693423	36681436	+	FHOD3		13	1	1	1			1	1	1
chr18	37067545	37066890	+	KIAA1328		9	1	1	1	1	1	1	1	1	1
chr18	37084232	37066890	+	KIAA1328		12	1	1	1	1	1	1	1	1	1
chr18	37160381	37066890	+	KIAA1328		2	1					1	1	1
chr18	37173081	37066890	+	KIAA1328		4	1			1		1	1	1
chr18	37173081	37160200	+	KIAA1328		10	1	1	1	1	1	1	1	1	1
chr10	106761588	106776692	-	SORCS1		5	1	1	1			1	1	1
chr10	829385	845055	-	LARP4B		9	1	1	1			1	1
chr18	3729135	3729375	-	DLGAP1		12	1	1	1			1	1
chr18	3729135	3742512	-	DLGAP1		2	1	1	1			1	1	1	1
chr18	3729135	3814273	-	DLGAP1		7	1					1	1	1	1
chr1	83882963	83907661	-	TTLL7		2	1	1	1			1	1
chr1	83882963	83952387	-	TTLL7		12	1	1	1			1	1
chr1	83890321	83906463	-	TTLL7		1	1	1	1			1	1
chr1	83890321	83907661	-	TTLL7		8	1	1	1			1	1
chr1	83890321	83911363	-	TTLL7		30	1	1	1			1	1
chr1	83890321	83929230	-	TTLL7		3	1					1	1
chr1	83890321	83933766	-	TTLL7		9	1	1	1			1	1
chr10	82959075	82358739	+	NRG3		1	0
chr1	83890321	83938016	-	TTLL7		1	1	1	1			1	1	1
chr1	83890321	83942679	-	TTLL7		6	1	1	1			1	1
chr1	83890321	83952387	-	TTLL7		6	1	1	1			1	1
chr1	83904079	83929230	-	TTLL7		6	1	1	1			1	1
chr1	83904079	83933766	-	TTLL7		8	1	1	1			1	1
chr1	83904079	83938016	-	TTLL7		6	1	1	1			1	1
chr1	83904079	83947282	-	TTLL7		9	1	1	1			1	1	1
chr1	83904079	83952387	-	TTLL7		4	1	1	1			1	1
chr1	83907456	83933766	-	TTLL7		1	1	1				1	1
chr1	83911165	83921394	-	TTLL7		2	1					1	1
chr10	82973915	82738577	+	NRG3		1	0
chr1	83911165	83929230	-	TTLL7		2	1					1	1
chr1	83911165	83938016	-	TTLL7		1	0
chr1	83911165	83942679	-	TTLL7		3	0
chr1	83911165	83947282	-	TTLL7	1	104	1	1	1			1	1
chr1	83917604	83938016	-	TTLL7		1	1	1	1			1	1
chr1	83917604	83942679	-	TTLL7		8	1	1	1			1	1
chr1	83929136	83942679	-	TTLL7		3	1	1	1			1	1
chr1	83929136	83947282	-	TTLL7		1	1	1	1			1	1	1
chr1	83929136	83952387	-	TTLL7		2	1	1	1			1	1	1	1
chr1	83933608	83952387	-	TTLL7		4	0
chr10	82979120	82951469	+	NRG3		1	1	1	1			1	1	1	1
chr1	83947124	83952387	-	TTLL7		5	1	1	1			1	1	1	1
[truncated: 34,707 more rows]
