# Supplementary material for: Genome-wide, integrative analysis of circular RNA dysregulation and the corresponding circular RNA-microRNA-mRNA regulatory axes in autism
Source: HighWire-hosted journal article supplement (doi:10.1101/gr.255463.119), 2020-03-01
Supplement: Supplemental_Table_S3.xlsx [file Supplemental_Table_S3.xlsx]

## Sheet: Note
Supplemental Table S3. The 1,060 circRNAs used for the DE analysis.
ATxx: ID for an ASD sample
CTxx: ID for a non-ASD control sample
TC and FC represent temporal cortex and frontal cortex samples, respectively.
The circRNA expression in each sample was provided, which was measured by the number of supporting backspliced junction reads per million uniquely mapped reads (RPM).

## Sheet: 1060 circRNAs in 134 samples
Chr#	Donor	Acceptor	Strand	Host gene symbol	circRNA	circRNA_ID	log2FC	LME P-value	DE-circRNA	DE-module	circBase (1:yes; 0: no)	circBase_brain (1:yes; 0: no)	CIRCpediaV2 (1:yes; 0: no)	CIRCpediaV2_brain (1:yes; 0: no)	circBase or CIRCpediaV2 (human) (1:yes; 0: no)	circBase or CIRCpediaV2 (human brain) (1:yes; 0: no)	circBase_mouse (1:yes; 0: no)	circBase_mouse_brain (1:yes; 0: no)	CIRCpediaV2_mouse (1:yes; 0: no)	CIRCpedia_mouse_brain (1:yes; 0: no)	circBase or CIRCpediaV2 (mouse) (1:yes; 0: no)	circBase or CIRCpediaV2 (mouse brain) (1:yes; 0: no)	AT10.FC	AT11.FC	AT12.FC	AT13.FC	AT14.FC	AT15.FC	AT16.FC	AT17.FC	AT18.FC	AT1.FC	AT21.FC	AT22.FC	AT23.FC	AT24.FC	AT26.FC	AT28.FC	AT29.FC	AT2.FC	AT30.FC	AT31.FC	AT32.FC	AT34.FC	AT35.FC	AT37.FC	AT38.FC	AT39.FC	AT3.FC
chr1	1223244	1223968	-	SDF4	circSDF4	circ2166	-0.262645	0.375371			1	1	1	1	1	1			1	1	1	1	0	0.0389581	0.0492879	0.011529	0.0124802	0.0334009	0	0.0201633	0.0270672	0.0409632	0.0394684	0.0361094	0	0	0.0175879	0.0494953	0.0243876	0.0204789	0.0408879	0	0.0457522	0.0258978	0.0421197	0.0209771	0	0.0279352	0.0248414
chr1	7778169	7777160	+	VAMP3	circVAMP3	circ11233	-0.0313761	0.936176			1	1	1	1	1	1					0	0	0	0.0259721	0.0739318	0.011529	0.0124802	0.0334009	0.04123	0.0100817	0.0180448	0.0409632	0.0131561	0.0361094	0.03915	0.0122966	0.0527637	0	0.0487752	0.0102395	0.0408879	0	0	0.0517955	0.0701996	0.0209771	0	0.0139676	0.0124207
chr1	8495063	8557523	-	RERE	circRERE_1	circ11856	0.0473199	0.8177			1	1	1	1	1	1			1	1	1	1	0.0832837	0.0519441	0.271083	0	0.0998416	0.100203	0.12369	0.100817	0.117291	0.0204816	0.157874	0	0.0782999	0.0860763	0.0527637	0.0824921	0.0243876	0.0511973	0.592875	0.200663	0.0915045	0.155387	0.0421197	0.125862	0.137567	0.0838055	0.0372622
chr1	8495063	8614686	-	RERE	circRERE_2	circ11857	0.0713805	0.855396			1	0	1	1	1	1			1	1	1	1	0.0555224	0	0	0.0922316	0.0374406	0.0835022	0	0.0806532	0	0.0614448	0.0789368	0	0.2349	0	0.0527637	0.263975	0.170713	0.0819157	0	0.315327	0	0.0517955	0.0701996	0	0.0550268	0	0
chr1	8541214	8557523	-	RERE	circRERE_3	circ11895	-0.0501741	0.390638			1	1	1	1	1	1			1	1	1	1	0.319254	0.0519441	0.616098	0.0461158	0.324485	0.0668018	0.350455	0.221796	0.171426	0.358428	0.486777	0.349058	0.215325	0.233636	0.474873	0.362965	0.195101	0.409579	0.470211	1.14664	0.457522	0.23308	0.350998	0.14684	0.385188	0.223481	0.0993658
chr1	9931891	9934860	-	LZIC	circLZIC	circ12709	0.156915	0.878316			1	1	1	1	1	1					0	0	0.0138806	0.012986	0	0.011529	0.0124802	0.0167004	0.020615	0.030245	0.0270672	0.0204816	0.0131561	0.0120365	0.03915	0.0491865	0.0527637	0	0	0	0	0.0286661	0.0457522	0	0.0421197	0	0	0.0279352	0
chr1	12002103	12001401	+	MFN2	circMFN2	circ2113	0.137316	0.518702			1	1	1	1	1	1					0	0	0.0138806	0	0.0246439	0	0.0249604	0	0	0.0201633	0.00902241	0	0.0394684	0.0120365	0.019575	0	0.0175879	0.0164984	0	0.0102395	0.020444	0	0.0228761	0.0258978	0.0140399	0.0524427	0.0275134	0.0139676	0.0124207
chr1	20893517	20942330	-	EIF4G3	circEIF4G3_1	circ3518	-0.641686	0.0360317	down		1	1	1	1	1	1					0	0	0	0.0519441	0.0246439	0.0345869	0.0499208	0.0668018	0.020615	0.0100817	0.0451121	0.0307224	0.0131561	0.0120365	0.019575	0.0122966	0.0703516	0.0329968	0	0.0102395	0.0408879	0.0286661	0	0.0258978	0	0.0524427	0.0275134	0.0139676	0.0124207
chr1	20904883	20942330	-	EIF4G3	circEIF4G3_2	circ3521	-0.0606072	0.785428			1	1	1	1	1	1					0	0	0.0138806	0.0389581	0.0246439	0.0230579	0	0	0	0.0201633	0.00902241	0.0102408	0.0131561	0.0120365	0	0.0122966	0.0175879	0.0329968	0	0	0.020444	0.143331	0.0457522	0.0258978	0.0561596	0.0524427	0	0	0.0248414
chr1	21050866	21111383	-	EIF4G3	circEIF4G3_3	circ3634	0.0295767	0.673108			1	1	1	1	1	1					0	0	0	0.0649301	0.0739318	0.011529	0.0374406	0	0	0.0403266	0	0.0614448	0	0.0361094	0.03915	0	0.0351758	0.0494953	0.0243876	0	0	0	0	0	0.0421197	0	0	0	0.0248414
chr1	23050520	23030469	+	KDM1A	circKDM1A_1	circ4632	0.0395869	0.719833			1	1	1	1	1	1			1		1	0	0.0138806	0.0389581	0.0492879	0.011529	0.0873614	0.0167004	0.061845	0.0201633	0.0360896	0.0614448	0.0657806	0	0.019575	0	0.0527637	0	0.0731628	0.0102395	0.143108	0.0573322	0.0228761	0.103591	0.0421197	0.0209771	0	0.0419027	0.0248414
chr1	23059167	23050387	+	KDM1A	circKDM1A_2	circ4638	0.21095	0.374285			1	1	1	1	1	1			1	1	1	1	0.0277612	0.012986	0.0492879	0	0.0124802	0.0167004	0.0824599	0.0201633	0	0.0409632	0.0920929	0.0361094	0	0	0	0.0164984	0.0243876	0.0102395	0.0408879	0.0286661	0.0457522	0.0517955	0.0280798	0.0314656	0.0275134	0.0419027	0.0124207
chr1	26259802	26257597	+	CEP85	circCEP85	circ5464	-0.17392	0.660321		down_Mturquoise	1	1	1	1	1	1					0	0	0.0138806	0	0.0246439	0.011529	0	0.0501013	0	0	0	0	0.0131561	0.0120365	0.03915	0.0122966	0.0527637	0.0164984	0.0243876	0	0.020444	0	0.0228761	0.0258978	0.0140399	0.0104885	0	0.0139676	0
chr1	26447660	26446316	+	DHDDS	circDHDDS	circ5473	0.224466	0.411876			1	1	1	1	1	1					0	0	0.0138806	0.0389581	0.0739318	0	0.0249604	0.0334009	0	0.0504083	0.0451121	0.0409632	0	0.0361094	0.0978749	0	0.0527637	0.0494953	0	0.0102395	0.0817759	0	0	0.0258978	0.126359	0	0	0.0419027	0.0496829
chr1	26732792	26729651	+	ARID1A	circARID1A	circ5511	0.614544	0.0213991	up		1	1	1	1	1	1			1	1	1	1	0.0555224	0.0519441	0	0.103761	0.0124802	0.0334009	0	0.0201633	0.0270672	0.0102408	0.0131561	0	0	0	0.0175879	0	0	0.0307184	0	0.0573322	0	0.0517955	0	0.104885	0.0275134	0.0139676	0.0496829
chr1	32948222	32949774	-	RNF19B	circRNF19B	circ6224	0.0506348	0.993637			1	1	1	1	1	1					0	0	0	0.012986	0	0	0.0124802	0	0	0	0	0.0307224	0.0526245	0.0120365	0.019575	0	0.0175879	0.0164984	0	0.0204789	0.0408879	0	0	0	0	0.0104885	0	0	0
chr1	33295305	33294937	+	ZNF362	circZNF362	circ6288	-0.392188	0.187064		down_Mturquoise	1	1	1	1	1	1					0	0	0.0138806	0	0	0.0345869	0.0124802	0	0	0.0201633	0.00902241	0	0.0263123	0.0120365	0.019575	0	0.0351758	0	0	0.0102395	0.0613319	0	0	0	0	0.0104885	0	0.0279352	0
chr1	35361789	35358925	+	ZMYM4	circZMYM4_1	circ6540	-0.334748	0.0975911		down_Mturquoise	1	1	1	1	1	1			1	1	1	1	0.0416418	0.0779162	0.246439	0.011529	0.0873614	0.0668018	0	0.0201633	0.0360896	0.0921672	0.105249	0.0722188	0.03915	0	0.140703	0.0989905	0.0487752	0.0921552	0.20444	0.0286661	0.137257	0.0776933	0.126359	0.0104885	0.0550268	0.0279352	0.0124207
chr1	35389082	35381259	+	ZMYM4	circZMYM4_2	circ6542	-0.166331	0.969268			1	1	1	1	1	1			1		1	0	0	0.0259721	0	0.0345869	0.0374406	0	0	0.030245	0.0451121	0.0204816	0.0263123	0.0361094	0.11745	0	0	0.0164984	0	0	0.020444	0	0.0228761	0	0.0280798	0	0.0550268	0.0279352	0.0124207
chr1	36361221	36362656	-	STK40	circSTK40	circ6593	-0.301195	0.111824			1	1	1	1	1	1					0	0	0	0.0259721	0.0492879	0.0230579	0.0249604	0.0167004	0	0.0100817	0.00902241	0.051204	0.0263123	0.0481459	0.019575	0.0122966	0	0.0329968	0	0.0204789	0.0408879	0.0573322	0.0457522	0	0.0421197	0.0209771	0.0275134	0	0
chr1	40202614	40189055	+	RLF	circRLF	circ6799	0.074135	0.86963			1	1	1	1	1	1			1	1	1	1	0.0694031	0.0909022	0.246439	0.0576448	0.0998416	0.0501013	0	0.0806532	0.0451121	0.051204	0.105249	0.0962918	0.11745	0.0368898	0.0351758	0.0989905	0.0243876	0.0614368	0.0408879	0.257995	0.114381	0.0517955	0.0280798	0.0734198	0.0825402	0.0698379	0.0993658
chr1	41070595	41075451	-	SCMH1	circSCMH1	circ6937	-0.0419143	0.783916			1	1	1	1	1	1			1	1	1	1	0.0138806	0.0389581	0.0246439	0.0576448	0.0249604	0	0.061845	0.0100817	0.00902241	0.0409632	0	0.0481459	0.0587249	0	0.0351758	0.115489	0.146326	0	0	0.200663	0.0228761	0	0.0140399	0.0104885	0.0275134	0.0558703	0.0869451
chr1	42265115	42278672	-	FOXJ3	circFOXJ3	circ6967	0.0127667	0.901221			1	1	1	1	1	1			1	1	1	1	0.0277612	0	0	0.011529	0	0.0334009	0	0.0100817	0	0	0	0.0240729	0	0.0122966	0	0.0164984	0	0	0	0.0859983	0	0.0517955	0.0140399	0	0	0.0139676	0.0372622
chr1	44308310	44319744	-	ERI3	circERI3_1	circ7177	0.545393	0.0204554	up		1	1	1	1	1	1			1	1	1	1	0.0277612	0.0389581	0.0492879	0	0	0	0.04123	0.0201633	0.0270672	0.0409632	0.0657806	0.0240729	0.03915	0	0	0.0824921	0	0.0204789	0.020444	0.114664	0	0.0517955	0.140399	0.0314656	0	0.0419027	0.0248414
chr1	44308310	44339322	-	ERI3	circERI3_2	circ7179	0.350076	0.102816			1	1	1	1	1	1			1	1	1	1	0.0277612	0.0259721	0.0246439	0.0345869	0.0124802	0.0167004	0	0.0100817	0.0451121	0	0.0394684	0.0481459	0.0978749	0.0122966	0.0175879	0.0824921	0	0.0204789	0.0408879	0.0859983	0	0.0517955	0.0140399	0.0314656	0.0550268	0	0
chr1	45087881	45088237	-	ZSWIM5	circZSWIM5	circ7323	0.137402	0.59202			1	1	1	1	1	1			1	1	1	1	0.0832837	0.012986	0	0	0.0124802	0	0	0	0.0360896	0.051204	0.0394684	0.0601824	0.03915	0	0.0879395	0.0329968	0.0731628	0.0204789	0.0408879	0.143331	0.0228761	0.0258978	0.0561596	0	0.0550268	0.0558703	0
chr1	48355670	48359770	-	SPATA6	circSPATA6	circ7706	0.419176	0.242186			1	1	1	1	1	1			1		1	0	0.0138806	0.0389581	0.0246439	0	0	0.0167004	0	0.0201633	0.00902241	0.0204816	0.0263123	0.0120365	0.019575	0.0122966	0	0.0494953	0.0243876	0.0102395	0	0	0	0	0.0421197	0.0314656	0	0.0139676	0.0496829
chr1	50655442	50744775	-	FAF1	circFAF1	circ7920	-0.0844845	0.844763			1	1	1	1	1	1			1		1	0	0.0277612	0.0259721	0.0246439	0	0.0124802	0	0	0	0.00902241	0.0102408	0.0526245	0	0.019575	0.0245932	0.0527637	0.0329968	0	0.0204789	0	0	0.0228761	0	0.0140399	0.0209771	0	0	0
chr1	51402435	51408332	-	EPS15	circEPS15_1	circ7964	0.0412578	0.794206			1	1	1	1	1	1			1		1	0	0.0416418	0.0519441	0.0492879	0.0461158	0	0.0167004	0.04123	0.0604899	0.00902241	0	0.0394684	0.0601824	0.0587249	0.0122966	0.0351758	0	0.0243876	0	0.020444	0.0859983	0.0228761	0.0258978	0.0561596	0.0629312	0.0825402	0.0279352	0
chr1	51405905	51408332	-	EPS15	circEPS15_2	circ7972	0.0802059	0.652762			1	1	1	1	1	1					0	0	0.0138806	0	0	0	0	0.0167004	0	0.030245	0	0.0204816	0	0.0120365	0	0	0	0.0659937	0.0243876	0	0.0613319	0.0286661	0.0228761	0.0776933	0	0.0104885	0	0.0139676	0.0124207
chr1	51827796	51834170	-	NRDC	circNRDC	circ7993	0.0838101	0.579542			1	1	1	1	1	1					0	0	0.0138806	0.012986	0	0.011529	0.0249604	0	0	0.0100817	0.0270672	0.0204816	0.0526245	0.0481459	0	0	0.0175879	0	0.0487752	0.0307184	0	0	0	0.0258978	0.0140399	0.0104885	0	0.0139676	0
chr1	52493611	52509712	-	ZCCHC11	circZCCHC11_1	circ8032	-0.102948	0.550085			1	1	1	1	1	1			1	1	1	1	0.0138806	0	0.0492879	0.0230579	0.0124802	0	0	0.0201633	0.00902241	0.0102408	0.0263123	0.0361094	0.03915	0	0.0351758	0	0.0243876	0.0307184	0	0.0859983	0.0228761	0.0517955	0	0	0	0.0279352	0
chr1	52515891	52526373	-	ZCCHC11	circZCCHC11_2	circ8043	0.410877	0.229675		down_Mturquoise	1	1	1	1	1	1			1	1	1	1	0.0416418	0	0	0	0	0	0	0	0.00902241	0.0409632	0.0263123	0.0120365	0.03915	0.0122966	0.0175879	0.0329968	0	0	0.0613319	0.0286661	0	0.0776933	0.0140399	0.0629312	0.0550268	0	0.0372622
chr1	59346398	59321536	+	FGGY	circFGGY_1	circ9221	0.413936	0.0204671			1	1	1	1	1	1			1		1	0	0.0277612	0.0649301	0.0492879	0.0691737	0.0499208	0.0668018	0.061845	0.0201633	0.0360896	0.0307224	0.0526245	0.0240729	0.019575	0.0122966	0.0175879	0.0494953	0.0731628	0.0204789	0.0817759	0.0573322	0.0228761	0.0517955	0.0561596	0.0629312	0	0.0139676	0.0124207
chr1	59378837	59339958	+	FGGY	circFGGY_2	circ9224	0.333777	0.111815			1	1	1	1	1	1					0	0	0	0	0.0246439	0.0345869	0.0124802	0.0167004	0.12369	0.0504083	0.0541345	0.0307224	0.0657806	0.0481459	0.0978749	0	0	0.0494953	0.0243876	0	0.10222	0.114664	0	0.0517955	0.126359	0.0524427	0.0825402	0	0.0124207
chr1	65366196	65364635	+	DNAJC6	circDNAJC6	circ9766	0.0112051	0.672762			1	1	1	1	1	1	1	1	1	1	1	1	0.0277612	0.012986	0.0492879	0.0461158	0.0748812	0.0835022	0.0824599	0.0705716	0.0631569	0.0307224	0.0920929	0.108328	0.11745	0.0122966	0.123115	0.0824921	0.0975504	0.0511973	0.20444	0.200663	0.388894	0.0258978	0.0421197	0.0419542	0.110054	0.139676	0.0372622
chr1	65918835	65913245	+	PDE4B	circPDE4B	circ9809	-0.0968505	0.602346			1	1	1	1	1	1	1	1	1	1	1	1	0.194329	0.0259721	0.246439	0.0922316	0.174723	0	0.103075	0.0504083	0.108269	0.245779	0.0526245	0.0481459	0.019575	0.0983729	0.510049	0.0824921	0.0975504	0.102395	0.797315	0.257995	0.549027	0.0776933	0.224639	0.0734198	0.0550268	0.0558703	0.0869451
chr1	66891154	66905375	-	WDR78	circWDR78	circ9897	0.393739	0.29789			1	1	1	1	1	1			1		1	0	0.0138806	0	0	0	0.0124802	0.0501013	0.020615	0.0100817	0	0.0204816	0.0131561	0.0120365	0.0782999	0.0122966	0.0175879	0.0989905	0	0.0102395	0.143108	0.0573322	0.0228761	0	0.0280798	0.0314656	0	0.0838055	0.0124207
chr1	70089819	70053026	+	LRRC7	circLRRC7	circ10149	-0.164119	0.796073		down_Mturquoise	1	1	1	1	1	1			1	1	1	1	0.0555224	0	0.0739318	0.011529	0.0124802	0	0.020615	0.0100817	0.0360896	0.0102408	0.0263123	0.0120365	0.019575	0	0.0175879	0	0	0.0102395	0.306659	0.0286661	0.0686283	0.0258978	0	0.0209771	0	0.0139676	0
chr1	70270856	70315566	-	ANKRD13C	circANKRD13C	circ10162	0.0946803	0.445866			1	1	1	1	1	1					0	0	0	0	0	0.011529	0.0124802	0	0.04123	0.0100817	0.0270672	0	0.0394684	0.0361094	0.03915	0.0368898	0.0351758	0	0.0243876	0	0.0613319	0.0573322	0	0.0258978	0.0701996	0.0104885	0	0.0139676	0
chr1	75750546	75739980	+	ACADM	circACADM	circ10848	0.527659	0.0572018			1	1	1	1	1	1			1		1	0	0	0.0259721	0.0492879	0.011529	0.0499208	0.0167004	0.020615	0.0504083	0.0180448	0.0204816	0.0394684	0.0481459	0.03915	0	0.0175879	0.0164984	0	0	0	0.0286661	0.0228761	0	0.0280798	0.0314656	0.0275134	0	0.0248414
chr1	77297947	77286941	+	AK5	circAK5	circ11178	0.296615	0.182571			1	1	1	1	1	1			1		1	0	0.0138806	0.0519441	0.0985758	0.0461158	0.0249604	0.0334009	0	0.0201633	0.0180448	0	0.0920929	0.0361094	0.019575	0.0122966	0	0.0329968	0	0.0102395	0.0613319	0.0286661	0.0457522	0.0517955	0	0.0629312	0.0825402	0	0
chr1	77631850	77641655	-	ZZZ3	circZZZ3	circ11207	-0.478741	0.170651			1	1	1	1	1	1			1	1	1	1	0	0.0259721	0.0246439	0	0.0124802	0	0.020615	0.0100817	0.0451121	0.0102408	0.0263123	0.0240729	0.019575	0	0.0175879	0.0329968	0	0.0102395	0	0	0.0228761	0	0	0.0104885	0.0275134	0.0139676	0.0248414
chr1	77717867	77725762	-	USP33	circUSP33	circ11225	0.216018	0.471434			1	1	1	1	1	1					0	0	0.0277612	0	0.0985758	0	0.0374406	0	0.061845	0.030245	0.0902241	0.0204816	0.0789368	0.0240729	0.019575	0.0245932	0.0879395	0	0	0.0409579	0.183996	0.0573322	0.0457522	0	0.0561596	0.0209771	0	0.0279352	0
chr1	77815231	77801331	+	MIGA1	circMIGA1	circ11254	0.30296	0.428667			1	1	1	1	1	1					0	0	0.0138806	0.012986	0.0246439	0.011529	0	0	0.04123	0.030245	0.0270672	0.0102408	0.0263123	0.0240729	0	0.0122966	0	0	0	0.0102395	0.020444	0.229329	0.0457522	0.129489	0.0280798	0	0.0275134	0.0139676	0.0372622
chr1	83911165	83947282	-	TTLL7	circTTLL7	circ11723	-0.175687	0.583531			1	1	1	1	1	1					0	0	0	0	0	0.011529	0.0124802	0.0501013	0.04123	0.0504083	0.00902241	0.0204816	0.0394684	0.0240729	0.0587249	0.0122966	0.0175879	0.0164984	0	0	0.0408879	0.114664	0	0.0258978	0.0140399	0.0104885	0.16508	0.0279352	0.0248414
chr1	84185182	84179177	+	PRKACB	circPRKACB_1	circ11733	-0.565905	0.0665218			1	1	1	1	1	1					0	0	0	0.0649301	0	0.0230579	0.0124802	0.0334009	0	0.0100817	0	0.0102408	0.0131561	0.0240729	0.019575	0	0.0351758	0.0329968	0.0243876	0	0.122664	0.0286661	0.0228761	0	0.0140399	0.0314656	0	0	0
chr1	84197824	84179177	+	PRKACB	circPRKACB_2	circ11735	0.291616	0.340376			1	1	1	1	1	1					0	0	0	0.012986	0.0492879	0.011529	0.0249604	0.0334009	0	0.0100817	0	0.0204816	0	0.0361094	0	0	0.0175879	0.0824921	0.0243876	0	0.0613319	0.143331	0	0.0776933	0.0140399	0.0419542	0	0	0
chr1	84214317	84179177	+	PRKACB	circPRKACB_3	circ11776	0.0636274	0.867787			1	1	1	1	1	1					0	0	0	0.0259721	0.0246439	0.0345869	0.0374406	0.0501013	0.04123	0.0201633	0.0451121	0.0307224	0.0526245	0.0240729	0.019575	0	0.0351758	0.0989905	0.0243876	0	0.020444	0.0859983	0	0.0258978	0.0561596	0.0314656	0.0550268	0	0.0372622
chr1	84655832	84671308	-	SSX2IP	circSSX2IP	circ11794	-0.193115	0.508875		down_Mturquoise	1	1	1	1	1	1					0	0	0	0	0.0246439	0.011529	0.0124802	0	0	0.0403266	0.0180448	0.051204	0.0394684	0.0722188	0	0	0.0703516	0	0.0243876	0.0204789	0.10222	0	0.0228761	0.0517955	0.0561596	0.0209771	0	0	0.0124207
chr1	92345914	92320599	+	RPAP2	circRPAP2_1	circ12368	-0.0408285	0.905417		down_Mturquoise	1	1	1	1	1	1					0	0	0.0277612	0	0.0246439	0.011529	0.0249604	0.0334009	0	0.0403266	0	0.0204816	0	0.0722188	0.03915	0.0122966	0	0	0	0	0.0408879	0	0	0.0776933	0.0561596	0	0.0550268	0.0279352	0
chr1	92345914	92333391	+	RPAP2	circRPAP2_2	circ12370	0.134292	0.485371			1	1	1	1	1	1					0	0	0.0277612	0.0259721	0.0985758	0.0461158	0.0124802	0.0668018	0.0824599	0	0.0180448	0.0409632	0.0131561	0.0481459	0.019575	0.0245932	0.0527637	0.0164984	0.0487752	0.0102395	0.0408879	0	0.0686283	0.103591	0.0842395	0.0419542	0.0275134	0.0139676	0.0372622
chr1	92380873	92333391	+	RPAP2	circRPAP2_3	circ12371	0.411691	0.0700725			1	1	1	1	1	1					0	0	0.0971643	0.0389581	0.0985758	0.0345869	0.0499208	0	0.061845	0.0806532	0.0721793	0.102408	0.210498	0.0962918	0	0	0.0351758	0.0989905	0	0	0.0817759	0.143331	0.0915045	0	0.0561596	0.104885	0.110054	0	0.0869451
chr1	92563642	92607727	-	EVI5	circEVI5	circ12372	0.0869734	0.70752			1	1	1	1	1	1			1	1	1	1	0	0.012986	0	0	0.0249604	0.0334009	0	0.0201633	0.0180448	0.0102408	0.0131561	0.0120365	0	0.0122966	0.0175879	0.0329968	0.0243876	0.0204789	0.0613319	0	0	0.0258978	0.0140399	0	0	0.0419027	0.0124207
chr1	95151419	95143891	+	TMEM56,TMEM56-RWDD3	circTMEM56	circ12604	-0.297428	0.334342			1	1	1	1	1	1					0	0	0	0.0259721	0.0492879	0	0	0	0	0.0403266	0	0	0.0131561	0.0481459	0	0	0.0527637	0.0824921	0	0	0	0.114664	0.0686283	0	0	0	0.0275134	0	0
chr1	98953070	98956741	-	PLPPR5	circPLPPR5	circ12706	0.0114939	0.91987		down_Mturquoise	1	1	1	1	1	1			1	1	1	1	0.0277612	0	0.0492879	0.011529	0.0748812	0.0334009	0.020615	0.0403266	0.0270672	0.0614448	0.0263123	0.0361094	0.03915	0.0368898	0.0175879	0.0824921	0.0243876	0.0511973	0.122664	0.0859983	0.0228761	0.0258978	0.0140399	0	0.0275134	0	0.0124207
chr1	99301897	99287965	+	PLPPR4	circPLPPR4	circ12708	0.198824	0.527638		down_Mturquoise	1	1	1	1	1	1			1	1	1	1	0.0277612	0	0.0492879	0.0230579	0.0124802	0	0	0.0100817	0.0180448	0	0.0789368	0.0361094	0	0.0368898	0	0.0494953	0	0	0	0.0286661	0.0457522	0	0.0140399	0.0209771	0	0.0139676	0
chr1	100921841	100906852	+	SLC30A7	circSLC30A7_1	circ1401	0.179227	0.53423			1	1	1	1	1	1			1	1	1	1	0	0	0.0246439	0.0230579	0	0.0167004	0.04123	0	0.0180448	0	0.0263123	0.0361094	0	0	0.0175879	0	0	0.0102395	0.0408879	0.171997	0	0.0517955	0.0140399	0	0	0.0139676	0
chr1	100974902	100913663	+	SLC30A7	circSLC30A7_2	circ1407	0.0977173	0.637707		down_Mturquoise	1	1	1	1	1	1					0	0	0.111045	0.012986	0.0739318	0	0.0873614	0	0.16492	0.0806532	0.0360896	0.163853	0.144717	0.120365	0.019575	0.0245932	0.158291	0.148486	0.0487752	0.0204789	0.122664	0.171997	0.137257	0.0517955	0.0140399	0.0104885	0.0550268	0.0139676	0.0124207
chr1	103575540	103565435	+	AMY2B	circAMY2B	circ1470	-0.105526	0.866872			1	1	1	1	1	1					0	0	0	0	0.147864	0.149876	0	0	0	0.100817	0.117291	0.12289	0.157874	0.180547	0	0.0491865	0.123115	0.181483	0	0.0921552	0.163552	0	0	0.0258978	0.140399	0.104885	0	0	0.0621036
chr1	114463104	114464388	-	TRIM33	circTRIM33	circ1994	0.104098	0.626642			1	1	1	1	1	1			1	1	1	1	0.0416418	0	0.147864	0	0.0374406	0.0167004	0.04123	0.0403266	0.0812017	0.0102408	0.0920929	0.0722188	0.0978749	0.0122966	0.0175879	0.115489	0.0731628	0.0511973	0.0613319	0.171997	0	0.0517955	0.0280798	0.0314656	0.110054	0.0558703	0.0248414
chr1	117414831	117402186	+	MAN1A2	circMAN1A2_1	circ2054	0.00661107	0.830874			1	1	1	1	1	1			1	1	1	1	0.152687	0.272707	0.320371	0.242108	0.312005	0.0167004	0.24738	0	0.153381	0.184334	0.276279	0.324985	0.35235	0.0737797	0.316582	0.0989905	0	0.0819157	0.674651	0.429992	0	0.207182	0.294838	0.251725	0.302647	0.265384	0.0993658
chr1	117420649	117402186	+	MAN1A2	circMAN1A2_2	circ2055	-0.463486	0.0558708		down_Mturquoise	1	1	1	1	1	1			1	1	1	1	0.874479	0	1.79901	0	0.811213	0.634617	0	0	0	0.819264	0	1.70918	0	0.307415	1.37186	0	1.21938	0	3.16881	0	2.44774	0	0	0	1.40318	0	0.50925
chr1	117466427	117402186	+	MAN1A2	circMAN1A2_3	circ2059	0.0974577	0.622827			1	1	1	1	1	1			1	1	1	1	0	0.0259721	0.0985758	0.011529	0.0374406	0.0501013	0	0.0201633	0.00902241	0.0204816	0.0263123	0.0361094	0.0782999	0.0122966	0.0527637	0.0164984	0.0487752	0.0204789	0.020444	0.114664	0.0915045	0.0776933	0.0701996	0.0419542	0.0550268	0.0139676	0.0372622
chr1	117502970	117460489	+	MAN1A2	circMAN1A2_4	circ2066	-0.912073	0.0171818	down	down_Mturquoise	1	1	1	1	1	1			1	1	1	1	0.0138806	0.012986	0	0	0.0374406	0	0	0	0.0360896	0.0409632	0.0263123	0.0240729	0.03915	0	0	0	0.0243876	0.0102395	0.0613319	0	0.0228761	0	0	0.0104885	0	0	0.0124207
chr1	147259918	147252623	+	CHD1L	circCHD1L	circ2379	-0.0216558	0.946972			1	1	1	1	1	1					0	0	0.0277612	0	0.0246439	0	0	0	0.020615	0	0.0270672	0	0	0.0481459	0.019575	0.0245932	0	0.0494953	0.0487752	0.0409579	0.020444	0	0.0457522	0	0.0140399	0.0209771	0	0.0419027	0.0124207
chr1	151315573	151316509	-	PI4KB	circPI4KB	circ2462	0.148033	0.464159			1	1	1	1	1	1			1		1	0	0.0277612	0.0259721	0	0.011529	0.0499208	0.0167004	0	0	0	0.0204816	0	0.0240729	0	0	0.0175879	0.0164984	0.0731628	0	0	0	0	0	0	0.0209771	0.0275134	0	0.0248414
chr1	155395459	155459898	-	ASH1L	circASH1L_1	circ2521	-0.477018	0.320893		down_Mturquoise	1	1	1	1	1	1			1	1	1	1	0.0138806	0	0.0246439	0.0230579	0.0249604	0.0167004	0.020615	0.0100817	0.00902241	0.051204	0	0.0361094	0	0	0	0.0164984	0	0.0307184	0.143108	0	0.0228761	0.0258978	0	0	0	0.0558703	0.0124207
chr1	155438327	155439068	-	ASH1L	circASH1L_2	circ2524	0.160732	0.462523			1	1	1	1	1	1			1	1	1	1	0.0416418	0.0649301	0.172508	0.011529	0.0124802	0.0668018	0.061845	0.0504083	0.0451121	0.0409632	0.0657806	0.0722188	0.0782999	0.0122966	0.0175879	0.115489	0	0.0511973	0.10222	0.114664	0.114381	0.0517955	0.0421197	0.0524427	0.0825402	0.0558703	0.0621036
chr1	155853276	155853806	-	GON4L	circGON4L	circ2541	-0.1901	0.577621			1	1	1	1	1	1			1		1	0	0.0277612	0.0389581	0.0739318	0.0345869	0.0374406	0.0167004	0.020615	0.0201633	0.0180448	0.0102408	0	0.0240729	0.03915	0.0122966	0.0175879	0.0494953	0.0487752	0.0102395	0.0817759	0.0286661	0.0457522	0	0	0.0104885	0.0275134	0	0.0124207
chr1	169230718	169287408	-	NME7	circNME7	circ2748	0.565962	0.0360024	up	down_Mturquoise	1	1	1	1	1	1					0	0	0.0277612	0	0.172508	0.0345869	0	0.0668018	0.061845	0.0403266	0.00902241	0.0204816	0.0263123	0.0842553	0.0782999	0	0	0.0164984	0	0.0102395	0.0817759	0.0286661	0.0457522	0	0.0561596	0.0314656	0.0275134	0.0698379	0.0372622
chr1	172253682	172131175	+	DNM3	circDNM3	circ2811	0.33302	0.224693			0	0	1	1	1	1			1		1	0	0	0.012986	0.0246439	0	0.0124802	0.0334009	0	0	0.00902241	0.0204816	0.0263123	0	0	0	0.0175879	0.0164984	0.0487752	0	0	0	0.0457522	0.0258978	0.0280798	0.0104885	0	0.0279352	0.0248414
chr1	176081152	176136547	-	RFWD2	circRFWD2	circ2918	0.610743	0.0907221			1	1	1	1	1	1			1	1	1	1	0	0	0	0	0	0	0.04123	0.0403266	0	0	0.0657806	0	0	0	0	0.0329968	0	0	0.0613319	0.171997	0.0228761	0.0258978	0	0	0.110054	0	0
chr1	178467421	178456721	+	RASAL2	circRASAL2	circ3033	-0.110993	0.839648			1	1	1	1	1	1					0	0	0	0.012986	0.0246439	0.011529	0	0.0501013	0	0.0100817	0.0270672	0.0102408	0.0131561	0	0	0	0	0	0.0243876	0.0102395	0.020444	0	0.0228761	0	0.0280798	0.0209771	0.0275134	0.0139676	0
chr1	179131311	179133374	-	ABL2	circABL2	circ3059	0.155571	0.410093			1	1	1	1	1	1					0	0	0.0277612	0.012986	0	0	0	0.0167004	0.061845	0.0100817	0	0.0307224	0	0.0481459	0.03915	0	0.0527637	0	0	0.0204789	0.020444	0	0.0228761	0	0.0842395	0.0419542	0.0825402	0.0558703	0.0124207
chr1	180984677	180993425	-	STX6	circSTX6_1	circ3113	-0.113016	0.549959			1	1	1	1	1	1			1	1	1	1	0.0694031	0.0259721	0.0739318	0.0230579	0.0873614	0	0.04123	0.0403266	0.126314	0.0716856	0.105249	0.0601824	0.03915	0.0245932	0.0351758	0.0824921	0	0.122874	0.163552	0.0859983	0.114381	0.0776933	0.0982794	0.0314656	0	0.0139676	0.0621036
chr1	180984677	181005463	-	STX6	circSTX6_2	circ3114	0.153676	0.584555		down_Mturquoise	1	1	1	1	1	1			1	1	1	1	0	0	0	0.011529	0	0	0	0.030245	0.00902241	0.0102408	0.0263123	0.0361094	0	0	0.0351758	0.0164984	0	0.0102395	0.10222	0.0286661	0.0686283	0.0258978	0.0140399	0	0	0	0.0124207
chr1	197642711	197658369	-	DENND1B	circDENND1B	circ3390	-0.190915	0.682574			1	1	1	1	1	1			1	1	1	1	0.0416418	0	0.0246439	0.0230579	0.0124802	0	0.020615	0.0201633	0.0451121	0	0.0263123	0.0481459	0	0.0491865	0.0175879	0.0329968	0	0.0102395	0.0408879	0.0286661	0.0228761	0	0.0280798	0.0209771	0.0275134	0.0419027	0
chr1	200815644	200760839	+	CAMSAP2	circCAMSAP2	circ3423	0.116008	0.799379			1	1	1	1	1	1					0	0	0.0416418	0.012986	0	0.0230579	0.0124802	0.0501013	0.04123	0.030245	0.0270672	0.051204	0	0.0601824	0	0	0.0175879	0.0164984	0.0487752	0.0102395	0.0817759	0	0	0.0258978	0.0421197	0.0104885	0.0275134	0.0279352	0
chr1	201848594	201847279	+	IPO9	circIPO9	circ3432	0.112849	0.582699		down_Mturquoise	1	1	1	1	1	1			1		1	0	0.0277612	0.012986	0	0.011529	0.0249604	0	0.020615	0.030245	0.00902241	0.0204816	0.0526245	0	0.03915	0.0245932	0.0175879	0	0	0	0	0.0286661	0	0.0776933	0.0140399	0.0209771	0.16508	0.0139676	0
chr1	205002748	205001170	+	NFASC	circNFASC	circ3470	0.14739	0.29731			1	1	1	1	1	1			1		1	0	0.0694031	0.116874	0	0.0576448	0.162243	0.0167004	0.061845	0.12098	0.0541345	0.0716856	0.0526245	0.108328	0.0782999	0.0368898	0.0351758	0.115489	0.0975504	0.0409579	0.0613319	0.0573322	0.0228761	0.0258978	0.0842395	0.0839083	0.0275134	0.0279352	0.0372622
chr1	211018864	211090690	-	KCNH1,AL590132.1	circKCNH1_1	circ3735	-0.218214	0.479692		down_Mturquoise	1	1	1	1	1	1			1	1	1	1	0.0138806	0.0779162	0	0.0230579	0	0	0	0.030245	0.00902241	0.0307224	0	0.0120365	0.0782999	0.0122966	0.0351758	0.0329968	0.0487752	0.0204789	0.122664	0.0859983	0.0686283	0	0	0	0	0	0.0248414
chr1	211082780	211090690	-	KCNH1,AL590132.1	circKCNH1_2	circ3755	0.538546	0.0528921			1	1	1	1	1	1			1	1	1	1	0.0277612	0.012986	0.0246439	0.0345869	0.0124802	0.0167004	0.020615	0.0100817	0.0270672	0.0204816	0.0131561	0.0361094	0.019575	0.0122966	0.0351758	0.0329968	0	0.0307184	0.0408879	0.0573322	0	0.0258978	0.0140399	0.0209771	0.0825402	0.0139676	0
chr1	211082780	211107377	-	KCNH1,AL590132.1	circKCNH1_3	circ3756	-0.131652	0.66752		down_Mturquoise	1	1	1	1	1	1			1	1	1	1	0.0832837	0	0.12322	0	0.0499208	0.0334009	0.061845	0	0.0721793	0.0307224	0.0526245	0.0601824	0	0.0368898	0.0175879	0	0.0975504	0	0.10222	0.0573322	0	0.0258978	0.0280798	0.104885	0.0275134	0.0139676	0.0496829
chr1	211778918	211793190	-	LPGAT1	circLPGAT1	circ3882	-0.0878631	0.600013			1	1	1	1	1	1			1	1	1	1	0.0138806	0.0259721	0	0	0.0124802	0.0334009	0.020615	0.0201633	0.00902241	0.0102408	0.0394684	0.0120365	0	0	0.0175879	0.0164984	0.0487752	0.0102395	0	0.171997	0.0228761	0.0517955	0.0140399	0.0314656	0.0550268	0.0419027	0
chr1	213117410	213077696	+	RPS6KC1	circRPS6KC1_1	circ4147	0.156804	0.725517			1	1	1	1	1	1			1	1	1	1	0.0138806	0.0389581	0.0492879	0	0.0249604	0.0167004	0.04123	0.0403266	0.0360896	0	0.0394684	0.0481459	0.03915	0.0122966	0	0.0824921	0.0243876	0	0.020444	0.257995	0	0.0517955	0.0140399	0.0524427	0.0275134	0.0838055	0
chr1	213129889	213077696	+	RPS6KC1	circRPS6KC1_2	circ4150	-0.36734	0.288932			1	1	1	1	1	1			1	1	1	1	0.0277612	0	0.0246439	0	0	0	0	0	0	0	0.0131561	0.0120365	0.03915	0	0.0175879	0	0	0	0	0.0573322	0	0.0517955	0	0	0.0825402	0.0279352	0
chr1	213167973	213077696	+	RPS6KC1	circRPS6KC1_3	circ4155	0.678146	0.0771359		down_Mturquoise	1	1	1	1	1	1			1	1	1	1	0	0.012986	0	0.0345869	0	0	0.020615	0.030245	0.0360896	0.0409632	0.0526245	0.0240729	0	0.0245932	0.0175879	0.0494953	0.0243876	0.0204789	0.0408879	0.171997	0	0	0.0421197	0.0104885	0	0	0
chr1	213176492	213129527	+	RPS6KC1	circRPS6KC1_4	circ4163	0.127358	0.354143			1	1	1	1	1	1			1		1	0	0.0138806	0.0259721	0.0739318	0.011529	0	0.0501013	0.020615	0.0100817	0.0270672	0.0102408	0.0263123	0.0120365	0.0587249	0.0122966	0	0.0329968	0	0.0102395	0.020444	0.0573322	0.0228761	0.0517955	0.0421197	0.0209771	0.110054	0.0558703	0.0124207
chr1	215172183	215169199	+	KCNK2	circKCNK2	circ4220	0.318796	0.296651		down_Mturquoise	1	1	1	1	1	1			1	1	1	1	0.0416418	0	0.0739318	0	0.0499208	0.0334009	0.020615	0.0403266	0.0360896	0.112649	0.0920929	0.0361094	0.03915	0.0368898	0.0879395	0.0164984	0.0975504	0.0204789	0.0817759	0.171997	0.0228761	0.0258978	0.0280798	0.0104885	0.0275134	0.0139676	0
chr1	227193786	227254155	-	CDC42BPA	circCDC42BPA	circ4535	-0.126037	0.479775			1	1	1	1	1	1			1	1	1	1	0.0138806	0	0	0	0.0499208	0	0.04123	0.030245	0.0270672	0.0409632	0	0.0240729	0.019575	0.0122966	0	0.0164984	0.0487752	0.0204789	0.020444	0	0.0457522	0.0776933	0.0140399	0	0.0550268	0	0
chr1	230675124	230663141	+	COG2	circCOG2	circ4648	-0.0142022	0.969929			1	1	1	1	1	1					0	0	0.0277612	0.0649301	0.0246439	0.011529	0	0.0501013	0.04123	0.0100817	0	0	0	0.0481459	0.019575	0	0	0.0329968	0.0731628	0	0.020444	0.0859983	0.0457522	0	0	0.0524427	0.0275134	0.0279352	0
chr1	230943806	230961303	-	TTC13	circTTC13_1	circ4667	-0.0796737	0.886734		down_Mturquoise	1	1	1	1	1	1					0	0	0.0138806	0	0	0	0.0124802	0	0.04123	0.0100817	0.0180448	0	0.0394684	0.0240729	0.0587249	0	0.0175879	0	0	0	0.0817759	0	0.0457522	0	0	0.0104885	0	0.0558703	0
chr1	230954333	230961303	-	TTC13	circTTC13_2	circ4669	-0.378239	0.208672			1	1	1	1	1	1	1	1	1	1	1	1	0.0416418	0	0	0	0.0249604	0	0.04123	0.0100817	0.0180448	0.0409632	0.0526245	0.0240729	0	0	0	0	0	0.0409579	0	0.0859983	0	0	0.0421197	0	0	0.0139676	0
chr1	233135013	233208689	-	PCNX2	circPCNX2_1	circ4792	0.0273459	0.813024			0	0	1	1	1	1					0	0	0.0277612	0	0.0492879	0.011529	0.0249604	0	0.020615	0	0.0270672	0.0102408	0	0.0120365	0	0	0	0.0494953	0.0243876	0	0.020444	0	0.0228761	0.0258978	0	0	0.0275134	0	0
chr1	233135013	233236980	-	PCNX2	circPCNX2_2	circ4794	0.0288969	0.849122			1	0	1	1	1	1					0	0	0.0138806	0.012986	0.0739318	0.011529	0	0.0167004	0.020615	0.0201633	0.0451121	0.0102408	0.0131561	0	0.019575	0	0	0.0329968	0	0.0204789	0.020444	0.0573322	0	0.0258978	0.0280798	0.0314656	0.0550268	0	0.0124207
chr1	233198939	233236980	-	PCNX2	circPCNX2_3	circ4813	0.00174896	0.871796			1	1	1	1	1	1			1	1	1	1	0.0277612	0.0649301	0.0492879	0.0345869	0.0249604	0.0835022	0	0.0403266	0.0180448	0.0716856	0.0131561	0.0361094	0	0	0	0.0659937	0.0243876	0.0204789	0.0613319	0.0573322	0	0.103591	0	0.0209771	0	0.0139676	0.0248414
chr1	233198939	233252788	-	PCNX2	circPCNX2_4	circ4814	0.0817126	0.999367			1	1	1	1	1	1					0	0	0	0.0259721	0.0492879	0.0345869	0.0249604	0.0835022	0	0.0201633	0	0.0102408	0.0263123	0.0240729	0	0.0122966	0	0	0	0.0204789	0	0	0.0228761	0	0.0140399	0.0104885	0	0	0.0372622
chr1	233217899	233227371	-	PCNX2	circPCNX2_5	circ4818	0.0562596	0.848531			1	1	1	1	1	1					0	0	0	0	0	0	0	0.0167004	0	0	0.00902241	0	0.0131561	0.0120365	0	0	0.0175879	0.0494953	0	0	0.0408879	0.0286661	0	0	0	0	0	0.0279352	0
chr1	240868587	240870119	-	RGS7	circRGS7	circ5067	0.103569	0.753762		down_Mturquoise	1	1	1	1	1	1	1	1	1	1	1	1	0.0277612	0.012986	0.0246439	0.0345869	0	0.0167004	0.04123	0.0100817	0.0360896	0	0.0131561	0.0361094	0.019575	0	0.0351758	0	0.0487752	0.0102395	0.0408879	0.0286661	0.0228761	0.0517955	0	0.0209771	0.0275134	0.0139676	0.0248414
chr1	243426558	243316755	+	SDCCAG8	circSDCCAG8_1	circ5148	0.158691	0.418372		down_Mturquoise	0	0	1	1	1	1					0	0	0.0277612	0.0259721	0	0	0.0249604	0.0501013	0	0	0.0451121	0.0409632	0.0263123	0.0481459	0	0	0	0	0	0	0.0613319	0.0573322	0	0.0258978	0	0.0209771	0.110054	0.0279352	0.0124207
chr1	243426558	243415702	+	SDCCAG8	circSDCCAG8_2	circ5152	-0.021049	0.647472		down_Mturquoise	1	1	1	1	1	1	1		1	1	1	1	0.0555224	0.0779162	0.0985758	0.0230579	0.0374406	0.0334009	0	0.0604899	0.0360896	0.0307224	0.0526245	0.0240729	0.019575	0.0245932	0.123115	0.0659937	0.0243876	0.0307184	0.10222	0.0286661	0.0686283	0.0776933	0.0561596	0.0314656	0.0825402	0.0279352	0
chr1	243545510	243573048	-	AKT3	circAKT3_1	circ5165	0.25708	0.0482104			1	1	1	1	1	1	1	1	1	1	1	1	0.166567	0.233748	0.172508	0.138347	0.149762	0.0835022	0.12369	0.131061	0.0721793	0.102408	0.223654	0.264802	0.411075	0.0491865	0.0351758	0.164984	0.243876	0.112634	0.163552	0.51599	0.114381	0.0517955	0.126359	0.220259	0.16508	0.307287	0.124207
chr1	243545510	243695716	-	AKT3	circAKT3_2	circ5170	-0.0230344	0.804968			0	0	1	1	1	1			1		1	0	0.0416418	0.012986	0.0246439	0.0230579	0	0.0167004	0.061845	0	0.0721793	0.0204816	0.105249	0.144438	0.0782999	0	0	0.0659937	0	0	0.0408879	0.171997	0	0.0776933	0.0701996	0.0419542	0.110054	0.153643	0
chr1	243545510	243843282	-	AKT3	circAKT3_3	circ5172	-0.0319736	0.772914			1	0	1	1	1	1			1	1	1	1	0.499702	0.272707	0.320371	0	0.511688	0.200405	0	0.383103	0	0	0	0	0	0.159856	0.457285	0.263975	0.243876	0.37886	0.531543	0.429992	0	0	0	0.398565	0.577781	0	0.285677
chr1	243552729	243843282	-	AKT3	circAKT3_4	circ5178	0.0739419	0.710441		down_Mturquoise	0	0	1	1	1	1			1	1	1	1	0.0277612	0.0259721	0.0739318	0.011529	0.0374406	0	0.020615	0.030245	0.0270672	0.0204816	0.0920929	0.0481459	0.0587249	0	0.0703516	0.0329968	0	0.0409579	0.10222	0.0573322	0.0915045	0	0.0982794	0.0314656	0	0.0279352	0
chr1	243563720	243695716	-	AKT3	circAKT3_5	circ5183	-0.542116	0.157953		down_Mturquoise	1	0	1	1	1	1	1		1	1	1	1	0.0138806	0.012986	0.0492879	0	0.0249604	0.0167004	0	0.030245	0.00902241	0.0102408	0	0	0	0.0122966	0.0351758	0	0	0.0307184	0.0408879	0.0573322	0.0228761	0	0	0.0209771	0	0.0139676	0.0124207
chr1	243563720	243843282	-	AKT3	circAKT3_6	circ5184	-0.380251	0.218865			1	0	1	1	1	1			1	1	1	1	0	0.0389581	0	0	0.0998416	0	0	0.0201633	0	0.0921672	0.0657806	0.120365	0	0	0.0879395	0.0494953	0.0243876	0.0716763	0.163552	0.0859983	0	0.103591	0.140399	0	0	0	0.0496829
chr1	243613671	243695716	-	AKT3	circAKT3_7	circ5191	-0.0467154	0.967005			1	1	1	1	1	1	1	1	1	1	1	1	0.0138806	0.0519441	0.0739318	0	0.062401	0	0	0.0907349	0.0451121	0	0.118405	0.0722188	0.019575	0.0122966	0.0351758	0	0.0487752	0.0204789	0	0	0.0228761	0	0.0701996	0	0	0.0698379	0.0248414
chr1	243613671	243843282	-	AKT3	circAKT3_8	circ5193	0.197503	0.256133			1	0	1	1	1	1			1	1	1	1	0.0832837	0	0.221795	0.149876	0	0.100203	0	0	0.171426	0.0409632	0	0.324985	0.11745	0	0	0.148486	0.146326	0	0.286215	0.458658	0.0915045	0.155387	0.196559	0	0.412701	0.265384	0.198732
chr1	243645893	243843282	-	AKT3	circAKT3_9	circ5198	-0.351341	0.399295		down_Mturquoise	1	0	1	1	1	1			1	1	1	1	0	0	0	0	0	0	0	0	0.00902241	0.0307224	0	0.0481459	0	0.0245932	0	0	0.0487752	0.0204789	0.0408879	0.0573322	0.0228761	0	0.0421197	0.0209771	0.0275134	0.0279352	0
chr1	245915530	245929937	-	SMYD3	circSMYD3	circ5263	-0.105866	0.977319		down_Mviolet	1	1	1	1	1	1	1	1	1	1	1	1	0	0.0649301	0	0.0230579	0.0374406	0	0.020615	0.0100817	0	0	0	0.0361094	0	0	0.0175879	0.0329968	0	0.0204789	0.0408879	0	0	0	0.0140399	0.0104885	0	0	0.0124207
chr10	221356	179994	+	ZMYND11	circZMYND11_1	circ598	-0.148207	0.360808			1	1	1	1	1	1			1	1	1	1	0.0138806	0	0.0246439	0.011529	0.0249604	0.0167004	0	0.0100817	0	0.0102408	0.0131561	0.0240729	0.019575	0.0122966	0.0351758	0.0329968	0	0.0204789	0.0408879	0.0859983	0.0228761	0	0	0	0	0	0
chr10	249088	179994	+	ZMYND11	circZMYND11_2	circ619	0.0256467	0.8609		down_Mturquoise	1	1	1	1	1	1			1		1	0	0.0555224	0.0649301	0.0246439	0	0.0249604	0	0.020615	0.0100817	0.0180448	0.0204816	0.0657806	0.0722188	0.03915	0	0.0175879	0	0	0.0307184	0.10222	0	0.0228761	0.0517955	0.112319	0.0209771	0.0550268	0.0279352	0
chr10	5794885	5800705	-	GDI2	circGDI2	circ857	-0.278406	0.355714			1	1	1	1	1	1			1	1	1	1	0	0.012986	0	0.011529	0.0249604	0	0.04123	0.0100817	0.00902241	0	0.0131561	0.0240729	0.019575	0	0	0.0329968	0	0	0	0.0859983	0.0457522	0	0.0421197	0.0209771	0.0275134	0	0
chr10	7243558	7285954	-	SFMBT2	circSFMBT2_1	circ1048	0.192144	0.336982			1	1	1	1	1	1			1	1	1	1	0.0694031	0.0389581	0	0.0345869	0.0748812	0.0334009	0.061845	0.0504083	0.0721793	0.0409632	0.0920929	0.0842553	0.0782999	0	0.0703516	0.131987	0.0975504	0.0307184	0.0817759	0.143331	0.137257	0.0258978	0.0561596	0	0.192594	0.097773	0
chr10	7276892	7285954	-	SFMBT2	circSFMBT2_2	circ1057	0.754987	0.000104109	up		1	1	1	1	1	1			1	1	1	1	0.0277612	0.0389581	0	0.0807027	0.062401	0.0835022	0.103075	0.0201633	0.0721793	0.0409632	0.0657806	0.120365	0.0978749	0.11067	0.0527637	0.0659937	0.0975504	0.102395	0	0.143331	0.114381	0.0776933	0.112319	0.0839083	0.0275134	0	0.0745243
chr10	7802854	7797047	+	ATP5C1	circATP5C1	circ1162	0.297799	0.0565243			1	1	1	1	1	1					0	0	0.124926	0.142846	0.147864	0.126818	0.162243	0.0835022	0.24738	0.100817	0.0812017	0.225298	0.0789368	0.228693	0.0782999	0.0614831	0.211055	0.21448	0.0243876	0.122874	0.449767	0.315327	0.41177	0.0517955	0.294838	0.0629312	0.16508	0.097773	0.0993658
chr10	14897517	14896846	+	SUV39H2	circSUV39H2	circ500	-0.186111	0.563514		down_Mturquoise	1	1	1	1	1	1					0	0	0.0138806	0.0259721	0.0492879	0	0.0124802	0	0	0.0201633	0.00902241	0.0307224	0.0657806	0.0120365	0.019575	0.0245932	0	0	0	0.0409579	0.143108	0.0286661	0.0228761	0	0.0421197	0	0	0	0
chr10	15833630	15847943	-	MINDY3	circFAM188A	circ529	-0.220246	0.379497			1	1	1	1	1	1	1	1	1	1	1	1	0	0.012986	0.0492879	0	0.0124802	0.0501013	0.020615	0.0504083	0.00902241	0.0102408	0.0394684	0.0240729	0	0.0122966	0.0175879	0.0659937	0.0243876	0.0102395	0.0817759	0.143331	0	0.0258978	0.0421197	0.0524427	0.0275134	0.0838055	0.0372622
chr10	16752539	16782084	-	RSU1	circRSU1	circ531	0.157653	0.660057			1	1	1	1	1	1			1	1	1	1	0	0.012986	0	0.011529	0.0124802	0.0167004	0	0	0	0.0204816	0.0394684	0.0120365	0	0	0.0175879	0.0329968	0	0.0204789	0.0408879	0.0859983	0	0.0517955	0	0	0.0275134	0.0279352	0.0372622
chr10	17705741	17704431	+	STAM	circSTAM	circ538	0.304755	0.137517			1	1	1	1	1	1					0	0	0	0.012986	0.0492879	0	0.0374406	0.0334009	0.020615	0.0403266	0.00902241	0.051204	0.0526245	0.0481459	0.019575	0.0368898	0.0175879	0	0.0243876	0.0204789	0.0408879	0.0859983	0.0228761	0.0258978	0.0421197	0	0.0550268	0.0139676	0
chr10	21904522	21920963	-	DNAJC1	circDNAJC1	circ595	-0.164448	0.487098			1	1	1	1	1	1			1		1	0	0.0277612	0	0.0246439	0	0	0	0	0.0201633	0	0.0307224	0.0131561	0	0.03915	0.0122966	0.0351758	0.0164984	0	0	0.0408879	0	0.0457522	0	0	0.0104885	0	0	0
chr10	31908172	31910563	-	ARHGAP12	circARHGAP12	circ719	-0.164812	0.514422			1	1	1	1	1	1	1	1	1	1	1	1	0.0277612	0.0389581	0.0492879	0.126818	0.0124802	0.0334009	0.020615	0.0403266	0.0270672	0.0307224	0.0657806	0.108328	0.0978749	0.0245932	0.0351758	0.0659937	0.0731628	0	0	0.143331	0.0457522	0	0.0280798	0.0734198	0.16508	0.153643	0.0745243
chr10	32474023	32451592	+	CCDC7	circCCDC7	circ728	-0.0833079	0.696501		down_Mturquoise	1	1	1	1	1	1					0	0	0.0832837	0.0389581	0.147864	0.0576448	0.0748812	0.0668018	0.12369	0.12098	0	0.13313	0.197342	0.0842553	0.03915	0.0122966	0.0703516	0.0824921	0.0975504	0.0716763	0.347547	0.171997	0.297389	0.0517955	0.0982794	0.0943969	0.0825402	0.097773	0
chr10	43158931	43154897	+	CSGALNACT2	circCSGALNACT2	circ794	0.111933	0.694457		down_Mturquoise	1	1	1	1	1	1					0	0	0.0138806	0	0.0739318	0	0.0249604	0	0	0.0100817	0	0.0204816	0.0131561	0.0361094	0	0	0	0.0329968	0	0.0307184	0.0613319	0.0286661	0	0.0776933	0.0140399	0.0104885	0	0	0
chr10	48410168	48401612	+	MAPK8	circMAPK8	circ818	-0.0962516	0.607333		down_Mturquoise	1	1	1	1	1	1			1	1	1	1	0	0.012986	0	0	0.0374406	0.0501013	0	0.030245	0.00902241	0.0307224	0.0657806	0.0120365	0	0	0	0.0659937	0	0.0102395	0.020444	0.0286661	0.0457522	0	0.0280798	0.0209771	0.0275134	0.0279352	0.0124207
chr10	50433476	50466932	-	SGMS1	circSGMS1_1	circ835	0.20578	0.57245			1	1	1	1	1	1			1		1	0	0.0138806	0.012986	0.0739318	0.0230579	0.0124802	0.0167004	0.020615	0.030245	0.0180448	0	0.0394684	0.0361094	0.03915	0.0245932	0.0175879	0.0329968	0.0487752	0.0102395	0.020444	0	0.0915045	0.0258978	0	0.0314656	0.0550268	0.0419027	0.0248414
chr10	50460673	50590247	-	SGMS1	circSGMS1_2	circ840	-0.235977	0.357398		down_Mturquoise	1	0	1	1	1	1					0	0	0.0416418	0.012986	0.0985758	0.0461158	0.0499208	0	0.061845	0.030245	0.0631569	0.0409632	0.0920929	0.0842553	0.137025	0	0.0703516	0.0329968	0	0.0409579	0.265772	0.0859983	0.0686283	0.0776933	0.126359	0.0104885	0.0550268	0.0419027	0
chr10	60084602	60085253	-	ANK3	circANK3	circ876	-0.215511	0.387008			1	1	1	1	1	1					0	0	0.0277612	0	0.0246439	0	0.0499208	0	0.04123	0.0201633	0.0270672	0.0204816	0.0263123	0.0240729	0	0.0122966	0.105527	0	0	0	0.020444	0.0573322	0.0228761	0	0.0280798	0	0	0	0
chr10	67966683	68014186	-	HERC4	circHERC4	circ922	0.0626765	0.814459		down_Mturquoise	1	1	1	1	1	1					0	0	0.0277612	0.0389581	0.0492879	0	0.062401	0	0	0.0100817	0.0812017	0.0409632	0.0789368	0.0120365	0	0.0122966	0.0351758	0.0329968	0.0731628	0.0204789	0.020444	0	0.0686283	0	0.0421197	0.0104885	0.0275134	0.0279352	0.0248414
chr10	68393138	68394451	-	RUFY2	circRUFY2	circ953	-0.374238	0.211231		down_Mturquoise	1	1	1	1	1	1					0	0	0.0277612	0	0	0.0230579	0.0374406	0	0	0.0504083	0	0.051204	0.0263123	0.0361094	0.0782999	0	0	0.0164984	0.0487752	0.0307184	0.0613319	0.0859983	0.0457522	0	0	0.0419542	0.0825402	0.0139676	0
chr10	68487144	68506718	-	SLC25A16	circSLC25A16	circ970	0.0326853	0.878668		down_Mturquoise	1	1	1	1	1	1					0	0	0.0971643	0.012986	0.0739318	0.0230579	0	0	0.144305	0.12098	0.0812017	0.102408	0.0526245	0.108328	0.0587249	0.0368898	0.0527637	0.0329968	0	0.0409579	0.163552	0.229329	0.0915045	0.0258978	0.0561596	0.0209771	0	0.0419027	0.0248414
chr10	70859499	70844473	+	SGPL1	circSGPL1	circ1026	0.406416	0.153485			1	1	1	1	1	1					0	0	0	0.012986	0.0246439	0	0.0374406	0	0	0.0403266	0.00902241	0.0204816	0.0657806	0.0361094	0.0587249	0	0.0175879	0	0	0	0.10222	0.171997	0	0	0.0140399	0	0.0275134	0.0279352	0
chr10	72340789	72341170	-	DNAJB12	circDNAJB12	circ1045	0.311912	0.203389			1	1	1	1	1	1					0	0	0.0138806	0.0259721	0	0.0461158	0.0499208	0	0	0.0201633	0.0541345	0.0614448	0.0263123	0.0361094	0.0978749	0.0737797	0.0351758	0.0494953	0.0975504	0.0614368	0	0	0	0	0.0701996	0.0104885	0	0.0279352	0.0124207
chr10	74843478	74842600	+	KAT6B	circKAT6B	circ1112	0.108283	0.980519			1	1	1	1	1	1	1	1	1	1	1	1	0.0416418	0.0389581	0.0492879	0	0.062401	0	0.04123	0.030245	0.0721793	0.13313	0.0263123	0.0120365	0	0.0245932	0.0703516	0	0.0243876	0.0921552	0.163552	0.0573322	0.205885	0	0.0421197	0.0209771	0	0	0.0124207
chr10	76944773	76970067	-	KCNMA1	circKCNMA1	circ1131	0.1574	0.388807			1	1	1	1	1	1	1	1	1	1	1	1	0.0138806	0	0	0.011529	0.0124802	0.0167004	0	0	0.0180448	0.0614448	0.0131561	0.0240729	0.019575	0	0	0.0164984	0.0243876	0.0204789	0.0613319	0.0286661	0	0	0.0140399	0.0104885	0	0	0
chr10	84425893	84417771	+	CCSER2	circCCSER2_1	circ1177	0.31203	0.203445			1	1	1	1	1	1			1	1	1	1	0.0277612	0.012986	0.0246439	0.011529	0.0124802	0	0.103075	0.0201633	0.0180448	0.0204816	0.0263123	0.0120365	0.019575	0	0	0.0494953	0.0243876	0	0.0613319	0.171997	0.0457522	0	0.0421197	0.0314656	0.0275134	0.0139676	0.0372622
chr10	84477664	84438512	+	CCSER2	circCCSER2_2	circ1182	0.0666828	0.577424			1	1	1	1	1	1			1	1	1	1	0.0277612	0.012986	0.0739318	0.0576448	0.0124802	0	0	0.0504083	0.0180448	0.0204816	0.0131561	0.0361094	0.03915	0	0.0175879	0.131987	0.0243876	0.0102395	0.10222	0.0573322	0	0.103591	0	0.0419542	0	0.0279352	0.0248414
chr10	87767673	87776427	-	ATAD1	circATAD1	circ1205	0.192832	0.706571			1	1	1	1	1	1					0	0	0.0416418	0	0	0	0.0499208	0	0.061845	0.0100817	0.0360896	0.0102408	0.0263123	0	0.019575	0.0122966	0.0527637	0.0164984	0.0243876	0.0102395	0.0613319	0	0.0457522	0.0517955	0	0	0	0	0.0745243
chr10	88922436	88901656	+	STAMBPL1	circSTAMBPL1	circ1211	0.36266	0.078532			1	1	1	1	1	1					0	0	0.0138806	0.0259721	0	0	0.0249604	0.0334009	0	0.0403266	0.0541345	0.0102408	0.0789368	0.0962918	0.0978749	0	0	0.0164984	0.0487752	0.0102395	0.0408879	0.0286661	0.0686283	0.0517955	0.0140399	0.0104885	0.0550268	0.0558703	0.0372622
chr10	91842391	91819270	+	TNKS2	circTNKS2	circ1231	0.0710968	0.701458		down_Mturquoise	1	1	1	1	1	1					0	0	0.0277612	0	0.0246439	0	0	0.0334009	0	0.030245	0.0360896	0.0307224	0.0131561	0.0240729	0.019575	0.0245932	0.0175879	0	0	0.0102395	0.122664	0	0.0686283	0	0.0280798	0.0419542	0	0	0
chr10	92081320	92091944	-	CPEB3	circCPEB3	circ1263	0.315746	0.364791			1	1	1	1	1	1	1	1	1		1	1	0.0138806	0	0	0.011529	0	0.0167004	0	0.0100817	0.0180448	0	0	0	0.03915	0	0.0175879	0.0494953	0	0	0.0408879	0	0	0	0	0.0209771	0	0.0139676	0
chr10	92531748	92537550	-	IDE	circIDE	circ1288	0.0171598	0.685292		down_Mturquoise	1	1	1	1	1	1	1	1	1	1	1	1	0.0277612	0.012986	0.0985758	0	0.0124802	0	0	0.030245	0.0360896	0	0.0263123	0.0240729	0.03915	0.0368898	0.105527	0.0494953	0	0.0716763	0.163552	0.0859983	0.160133	0.0776933	0.0701996	0.0314656	0.0550268	0.0139676	0.0124207
chr10	101667886	101676436	-	FBXW4	circFBXW4	circ27	0.414218	0.10882			1	1	1	1	1	1	1	1	1	1	1	1	0	0	0.0492879	0.0345869	0.0249604	0	0	0.0100817	0.0270672	0.0716856	0.0394684	0.0361094	0	0.0122966	0.0527637	0.0164984	0	0.0307184	0.10222	0.0286661	0	0.103591	0.0561596	0.0524427	0	0.0279352	0.0124207
chr10	101792839	101810314	-	MGEA5	circMGEA5	circ31	0.0338537	0.542442		down_Mturquoise	1	1	1	1	1	1			1	1	1	1	0	0	0.0246439	0	0.0249604	0	0.04123	0.0201633	0.0270672	0.0409632	0.0131561	0.0361094	0.03915	0.0245932	0	0.0164984	0.0243876	0.0307184	0	0.0286661	0.0228761	0.0258978	0.0701996	0	0.0275134	0.0139676	0.0248414
chr10	101939863	101957732	-	C10orf76	circC10orf76	circ52	0.166645	0.48326			1	1	1	1	1	1	1	1	1	1	1	1	0.0277612	0	0.0246439	0	0.0499208	0	0.020615	0	0.0360896	0.0102408	0	0.0120365	0.019575	0	0.0175879	0.0164984	0	0.0307184	0.020444	0	0	0	0	0	0	0	0
chr10	103585225	103570872	+	NEURL1	circNEURL1	circ91	-0.254131	0.424013		down_Mturquoise	1	1	1	1	1	1					0	0	0.0416418	0	0.0246439	0	0.0499208	0	0.061845	0	0.0360896	0.051204	0.0526245	0.0361094	0.019575	0	0.0175879	0.0494953	0	0	0.020444	0.0286661	0	0	0.0561596	0.0104885	0.110054	0	0
chr10	110598290	110596398	+	SMC3	circSMC3	circ142	-0.169917	0.457368			1	1	1	1	1	1			1		1	0	0.0694031	0.012986	0	0	0.0499208	0	0.0824599	0	0.0631569	0.0921672	0.0526245	0.0601824	0	0	0.0351758	0.0164984	0	0.0409579	0.0817759	0	0.0686283	0.0517955	0.112319	0.0209771	0	0.0279352	0
chr10	110985765	110964125	+	SHOC2	circSHOC2	circ149	-0.0731253	0.919782			1	1	1	1	1	1	1	1	1	1	1	1	0.0138806	0.012986	0.0246439	0	0	0.0668018	0	0.030245	0.0270672	0	0.0263123	0.0120365	0.019575	0	0.0351758	0.0494953	0	0.0102395	0.10222	0.0286661	0.0228761	0.0517955	0.0280798	0.0104885	0	0.0698379	0.0496829
chr10	115129535	115120185	+	ATRNL1	circATRNL1_1	circ192	-0.705434	0.158192		down_Mturquoise	1	1	1	1	1	1	1	1	1	1	1	1	0.569105	0.19479	0.418947	0.0461158	0.686411	0.0501013	0.556605	0.524246	0.97442	0.583726	0.723587	0.457386	0.489374	0.0614831	1.21356	0.445457	0.292651	0.286705	2.96437	0.458658	1.83009	0.129489	0.533517	0.167817	0.742862	0.223481	0.111787
chr10	115165645	115120185	+	ATRNL1	circATRNL1_2	circ195	-0.562566	0.20921		down_Mturquoise	1	1	1	1	1	1			1		1	0	0.0555224	0.012986	0.0492879	0	0.0499208	0	0.061845	0.0201633	0.0541345	0.0409632	0.105249	0.0240729	0	0.0368898	0.0351758	0.0659937	0	0.0204789	0.265772	0.0573322	0.0457522	0.0258978	0.0561596	0.0419542	0.0550268	0.0419027	0
chr10	115171292	115120185	+	ATRNL1	circATRNL1_3	circ196	-0.675268	0.0158715	down	down_Mturquoise	1	1	1	1	1	1					0	0	0.263732	0.0909022	0.295727	0.0230579	0.174723	0.150304	0.144305	0.272205	0.396986	0.184334	0.565713	0.156474	0.137025	0.0614831	0.298994	0.115489	0.0487752	0.0921552	0.735983	0.171997	0.640531	0.0517955	0.112319	0.0629312	0.357674	0.125708	0.0496829
chr10	115215880	115120185	+	ATRNL1	circATRNL1_4	circ199	-1.2687	0.0968034		down_Mturquoise	1	1	1	1	1	1	1	1	1	1	1	1	0.249851	0.0909022	0	0	0	0	0	0.211715	0.288717	0.13313	0.368372	0.276839	0.0587249	0.0737797	0	0.0659937	0	0.0614368	0	0	0.480398	0.207182	0.238678	0.0839083	0.16508	0.0838055	0.0124207
chr10	115241725	115120185	+	ATRNL1	circATRNL1_5	circ202	-0.734752	0.0353409	down	down_Mturquoise	0	0	1	1	1	1			1	1	1	1	0.319254	0	0.468235	0	0.224644	0	0.103075	0.191551	0	0	0	0.20462	0	0.0983729	0.386934	0	0.0487752	0.19455	0.735983	0.171997	0	0.207182	0.266758	0.0943969	0.16508	0.0698379	0.0248414
chr10	115268444	115120185	+	ATRNL1	circATRNL1_6	circ206	-0.864444	0.0239069	down	down_Mturquoise	0	0	1	1	1	1					0	0	0.180448	0.0259721	0.147864	0	0.0998416	0.0167004	0.04123	0.0806532	0.117291	0.0716856	0.0789368	0.0481459	0.019575	0.0245932	0.105527	0	0	0.0409579	0.122664	0	0.114381	0.0258978	0.154439	0.0209771	0.220107	0.0139676	0.0248414
chr10	115268444	115215697	+	ATRNL1	circATRNL1_7	circ207	-0.657004	0.0574897		down_Mturquoise	1	1	1	1	1	1					0	0	0.0416418	0	0.0246439	0	0.0249604	0	0	0.0201633	0.0541345	0.0307224	0.0394684	0.0120365	0.03915	0	0.0351758	0.0164984	0	0.0409579	0.0613319	0.143331	0.0228761	0	0	0.0104885	0	0	0
chr10	115286397	115215697	+	ATRNL1	circATRNL1_8	circ211	-0.452313	0.431153		down_Mturquoise	1	1	1	1	1	1					0	0	0.0138806	0	0	0.011529	0	0	0.020615	0.0100817	0.0180448	0.0204816	0	0.0361094	0	0	0.0527637	0.0164984	0.0243876	0	0.0408879	0	0.160133	0	0	0.0104885	0.0275134	0	0
chr10	115315736	115120185	+	ATRNL1	circATRNL1_9	circ217	-1.17148	0.0117188	down	down_Mturquoise	0	0	1	1	1	1					0	0	0.291493	0.0389581	0.0739318	0.0345869	0.386886	0	0.185535	0.171388	0.469165	0.184334	0.499933	0.180547	0.03915	0.0491865	0.386934	0.0329968	0	0.122874	0.858646	0	0.228761	0.258978	0.308878	0.104885	0.220107	0.0419027	0.0124207
chr10	115315736	115215697	+	ATRNL1	circATRNL1_10	circ219	-0.784869	0.0833363		down_Mturquoise	1	1	1	1	1	1					0	0	0.0694031	0	0	0	0.0998416	0	0	0.0504083	0.0541345	0.0102408	0.0526245	0.0361094	0	0	0.105527	0	0	0	0.10222	0	0.0686283	0	0.0421197	0.0104885	0.0550268	0.0139676	0.0124207
chr10	115469329	115120185	+	ATRNL1	circATRNL1_11	circ246	-0.872242	0.027369	down	down_Mturquoise	0	0	1	1	1	1			1	1	1	1	0.0277612	0	0	0	0.0499208	0	0.04123	0.0907349	0.0992465	0.0614448	0.144717	0.0481459	0	0.0122966	0.0351758	0.0164984	0.0487752	0.0102395	0.163552	0	0.205885	0.0258978	0.0842395	0.0314656	0.220107	0.0279352	0.0124207
chr10	115469329	115461941	+	ATRNL1	circATRNL1_12	circ252	0.248821	0.271041			1	1	1	1	1	1	1	1	1	1	1	1	0.0416418	0.0649301	0.0985758	0	0.0249604	0.0334009	0	0.0403266	0.0812017	0.0409632	0.0657806	0.144438	0.0978749	0.0245932	0.0879395	0.164984	0	0.0102395	0.20444	0.229329	0.205885	0.0776933	0.0561596	0.0314656	0.110054	0.167611	0.0248414
chr10	118685983	118730410	-	CACUL1	circCACUL1	circ305	0.191871	0.310114			1	1	0	0	1	1					0	0	0.0694031	0.012986	0.0246439	0	0.0124802	0	0.12369	0.0100817	0.0270672	0.0409632	0.0131561	0.0361094	0.03915	0	0.0527637	0.0164984	0.0243876	0.0307184	0.020444	0.171997	0.0915045	0.129489	0.0280798	0.0209771	0.0550268	0	0.0372622
chr10	121790169	121924329	-	ATE1	circATE1_1	circ364	-0.670756	0.00762456	down	down_Mturquoise	1	0	1	1	1	1	1	1	1	1	1	1	0.0555224	0.0389581	0	0.0345869	0	0.0334009	0	0	0.0180448	0.0307224	0	0	0	0	0.0175879	0.0494953	0	0.0102395	0	0.0859983	0.0686283	0	0.0561596	0.0314656	0.0550268	0.0279352	0.0124207
chr10	121836718	121924329	-	ATE1	circATE1_2	circ371	0.0569125	0.894756		down_Mturquoise	1	1	1	1	1	1	1	1	1	1	1	1	0	0	0.0492879	0	0.0249604	0	0.020615	0.0201633	0.00902241	0	0.0263123	0	0	0.0122966	0	0	0.0487752	0	0.183996	0.0286661	0.0228761	0.0258978	0.0140399	0.0419542	0	0.0139676	0
chr10	124681607	124682379	-	AC068896.1,FAM53B	circFAM53B	circ413	-0.120697	0.766434			1	1	1	1	1	1	1	1	1	1	1	1	0	0.0259721	0.0246439	0.0576448	0.0499208	0.0334009	0.061845	0.0201633	0.00902241	0.0614448	0.0263123	0.0481459	0.019575	0.0122966	0	0.0659937	0.0487752	0.0204789	0.0408879	0.114664	0.0228761	0.0258978	0.0421197	0.0734198	0	0.111741	0.0745243
chr10	127000307	126970702	+	DOCK1	circDOCK1	circ432	0.270695	0.444967			1	1	1	1	1	1					0	0	0.0138806	0.012986	0	0.0461158	0.0124802	0.0668018	0.020615	0	0	0.0204816	0	0.0120365	0.03915	0	0.0175879	0.0329968	0	0	0.0408879	0.114664	0.0228761	0	0.0140399	0.0104885	0.0275134	0.0139676	0.0124207
chr11	8137378	8140193	-	RIC3	circRIC3	circ3118	-0.0458531	0.881752			1	1	1	1	1	1	1		1		1	0	0.0416418	0.0389581	0.0246439	0.0230579	0.0249604	0.0167004	0.04123	0.0100817	0.0270672	0.0409632	0.0394684	0.0481459	0.019575	0.0122966	0.0175879	0.0164984	0.0487752	0.0102395	0	0	0	0	0.0280798	0.0104885	0.0275134	0.0419027	0
chr11	13413530	13421838	-	BTBD10	circBTBD10_1	circ1969	-0.10695	0.80177		down_Mturquoise	1	1	1	1	1	1			1		1	0	0	0.0519441	0.0985758	0.0345869	0.0499208	0	0.061845	0.0504083	0	0.051204	0.131561	0.168511	0.11745	0	0.0527637	0.0494953	0	0.0614368	0.224884	0	0	0.103591	0.168479	0.0524427	0.110054	0.0419027	0
chr11	13413530	13445181	-	BTBD10	circBTBD10_2	circ1970	-0.222167	0.449372			1	1	1	1	1	1			1		1	0	0	0.012986	0.0246439	0	0.0124802	0.0668018	0	0.0201633	0	0	0	0	0.03915	0	0	0.0329968	0	0	0.020444	0.0286661	0.0228761	0	0.0140399	0.0524427	0.0275134	0	0.0372622
chr11	17988597	18008076	-	SERGEF	circSERGEF	circ2085	-0.328367	0.498447			1	1	1	1	1	1	1	1	1	1	1	1	0.0138806	0.012986	0	0	0.0249604	0	0	0.0100817	0.0270672	0.0102408	0	0	0.03915	0.0122966	0	0	0	0	0	0.0286661	0	0	0.0140399	0.0209771	0	0	0
chr11	18291442	18292976	-	HPS5	circHPS5	circ2094	-0.246299	0.538146			1	1	1	1	1	1			1		1	0	0	0.012986	0.0246439	0.011529	0.0374406	0.0334009	0.144305	0	0.0270672	0.0204816	0.0263123	0.0361094	0	0.0122966	0	0.0164984	0.0243876	0	0.122664	0.0286661	0.0686283	0	0.0982794	0	0.0275134	0	0.0124207
chr11	20960560	20937786	+	NELL1	circNELL1	circ2145	0.212298	0.50056			1	1	1	1	1	1			1		1	0	0.0555224	0	0.0492879	0.0230579	0.0124802	0	0	0.0201633	0.0180448	0.0102408	0.0394684	0.0120365	0	0.0368898	0.123115	0.0164984	0.0487752	0.0102395	0.0613319	0.0286661	0.0457522	0.0258978	0.0842395	0.0314656	0.0825402	0.0558703	0
chr11	32935435	32927157	+	QSER1	circQSER1	circ2216	-0.135911	0.864065			1	1	1	1	1	1					0	0	0.0138806	0.012986	0	0	0.0124802	0	0	0.0403266	0.0451121	0.0102408	0.0131561	0	0	0	0.0175879	0.0164984	0	0.0102395	0.0408879	0	0.0228761	0	0.0280798	0.0104885	0.0550268	0	0.0372622
chr11	33287511	33286413	+	HIPK3	circHIPK3	circ2227	0.0451426	0.646584			1	1	1	1	1	1			1	1	1	1	0.166567	0.19479	0.443591	0.11529	0.212163	0.0668018	0.226765	0.322613	0.270672	0.215057	0.328903	0.553678	0.685124	0.0983729	0.211055	0.52795	0.438977	0.174071	0.429323	0.802651	0.205885	0.336671	0.252718	0.230748	0.632808	0.446962	0.161469
chr11	33552241	33551040	+	KIAA1549L	circKIAA1549L	circ2233	-0.0118799	0.877443			1	1	1	1	1	1					0	0	0.0138806	0.0259721	0.0246439	0	0	0.0334009	0.061845	0.0201633	0.00902241	0.0204816	0.0263123	0.0601824	0	0.0122966	0.0351758	0	0.0487752	0.0102395	0.0613319	0.0573322	0	0	0.0280798	0.0314656	0	0	0
chr11	34076642	34071726	+	CAPRIN1	circCAPRIN1	circ2241	-0.0545648	0.653747			1	1	1	1	1	1					0	0	0	0	0	0	0.0374406	0	0.020615	0.0201633	0.0360896	0.0204816	0.0394684	0.0601824	0.03915	0.0245932	0.0527637	0.0164984	0	0.0102395	0.0817759	0	0.0686283	0.103591	0.0561596	0	0.0275134	0	0
chr11	36227430	36227085	+	LDLRAD3	circLDLRAD3	circ2276	0.0406445	0.933002			1	1	1	1	1	1					0	0	0.0138806	0	0.0985758	0	0.0124802	0.0668018	0.020615	0.0504083	0.00902241	0.112649	0.0263123	0.0361094	0.019575	0.0122966	0.0175879	0.0824921	0.0731628	0.0102395	0.122664	0.143331	0.0686283	0	0.0561596	0.0629312	0	0	0.0496829
chr11	46076754	46092223	-	PHF21A	circPHF21A	circ2349	0.185838	0.181441			1	1	1	1	1	1			1	1	1	1	0.374777	0.415553	0.566811	0.242108	0.0748812	0.36741	0.12369	0.0705716	0.442098	0.266261	0.565713	0.397204	0.606824	0.196746	0.105527	0.280473	0.560915	0.174071	0.327103	0.659321	0.366018	0.414364	0.140399	0.566381	0.770375	0.586638	0.111787
chr11	58549786	58551232	-	LPXN	circLPXN	circ2576	-0.0316315	0.869482			1	1	1	1	1	1			1	1	1	1	0.0416418	0.103888	0.172508	0.0461158	0.0499208	0.0668018	0.04123	0.12098	0.0992465	0.0102408	0.0394684	0.156474	0.0587249	0	0.0703516	0.0494953	0.121938	0.0307184	0.0613319	0.286661	0.0686283	0.129489	0.0701996	0.125862	0.220107	0.139676	0.0993658
chr11	64685646	64685947	-	NRXN2	circNRXN2	circ2645	0.00563673	0.751446			1	1	1	1	1	1			1	1	1	1	0.0277612	0.012986	0	0.011529	0	0.0167004	0.04123	0.0100817	0.0180448	0.0204816	0.0131561	0.0361094	0.019575	0.0122966	0.0175879	0.0329968	0.0243876	0.0204789	0	0.0573322	0.0228761	0	0	0.0104885	0	0.0279352	0
chr11	72984088	72989097	-	FCHSD2	circFCHSD2	circ2839	0.116888	0.619432			1	1	1	1	1	1			1		1	0	0.0277612	0	0	0.011529	0.0124802	0.0334009	0.061845	0.0201633	0.00902241	0.0307224	0	0.0120365	0.019575	0	0.0527637	0	0.0243876	0.0102395	0.020444	0.114664	0.114381	0.0258978	0.0140399	0.0104885	0.0550268	0.0419027	0
chr11	73707420	73718718	-	RAB6A	circRAB6A	circ2849	0.10441	0.781233			1	1	1	1	1	1					0	0	0.0138806	0.0259721	0.0739318	0	0.0124802	0	0	0.0100817	0.0180448	0.12289	0.0131561	0.0842553	0.019575	0	0.0351758	0.115489	0.0487752	0.0204789	0.020444	0.0859983	0.0686283	0.0776933	0.0701996	0.0209771	0	0	0.0248414
chr11	74817714	74789626	+	RNF169	circRNF169	circ2886	0.138353	0.47151			1	1	1	1	1	1			1	1	1	1	0.0555224	0.0519441	0.0246439	0.0345869	0	0.0334009	0.061845	0.0201633	0.0180448	0.0204816	0.0526245	0.0842553	0.03915	0	0.0351758	0.0164984	0	0.0204789	0.163552	0.0859983	0.0457522	0.0517955	0.0140399	0.0314656	0.110054	0	0
chr11	77624963	77625818	-	CLNS1A	circCLNS1A	circ2995	0.387261	0.19645			1	1	1	1	1	1					0	0	0.0277612	0.0519441	0.246439	0.0461158	0.062401	0.0167004	0.04123	0	0.00902241	0.051204	0.0394684	0	0	0	0.0703516	0	0	0.0511973	0.0613319	0.114664	0.0457522	0	0.0561596	0	0	0.0279352	0.0248414
chr11	77683710	77693611	-	RSF1	circRSF1_1	circ3006	0.27188	0.485143			1	1	1	1	1	1					0	0	0.0138806	0	0.0246439	0.0230579	0	0.0167004	0.020615	0	0.00902241	0.0102408	0.0131561	0	0	0	0.0879395	0.0164984	0	0.0102395	0.020444	0.0286661	0.0686283	0	0	0	0	0.0279352	0.0124207
chr11	77698487	77702495	-	RSF1	circRSF1_2	circ3014	-0.00352313	0.855794			1	1	1	1	1	1			1	1	1	1	0.0971643	0.103888	0.172508	0.103761	0.0998416	0.0668018	0.103075	0.0806532	0.0721793	0.102408	0.105249	0.0722188	0.0978749	0.0368898	0.105527	0.131987	0.0487752	0.133113	0.143108	0	0.183009	0.103591	0	0.0943969	0.0825402	0.0838055	0.0621036
chr11	78465876	78493195	-	NARS2	circNARS2	circ3032	-0.0925854	0.736148		down_Mturquoise	1	1	1	1	1	1			1	1	1	1	0.0277612	0	0	0	0.0249604	0	0	0.0403266	0.0270672	0.051204	0	0.0120365	0.019575	0	0.0351758	0.0329968	0	0.0102395	0.10222	0	0	0	0	0	0.0550268	0.0419027	0
chr11	85974708	86031611	-	PICALM	circPICALM_1	circ3202	-0.126964	0.945293			1	1	1	1	1	1			1	1	1	1	0	0	0.0246439	0.011529	0.0249604	0.0167004	0.020615	0	0.00902241	0.0102408	0.0394684	0.0361094	0.0587249	0	0.0351758	0.0164984	0.0731628	0	0	0	0	0	0	0.0209771	0	0.0139676	0
chr11	85996826	86031611	-	PICALM	circPICALM_2	circ3225	0.347858	0.0221148			1	1	1	1	1	1			1	1	1	1	0.319254	0.233748	0.172508	0.207521	0.237124	0.200405	0.61845	0	0.315784	0.235538	0.381528	0.589787	0.469799	0.209042	0.140703	0.362965	0.195101	0.133113	0.245328	0.51599	0.274513	0.129489	0.224639	0	0.275134	0.419027	0.0621036
chr11	86022367	86031611	-	PICALM	circPICALM_3	circ3232	-0.0912604	0.887366			1	1	1	1	1	1			1	1	1	1	0	0.0259721	0.0492879	0.0345869	0	0	0.020615	0.0201633	0.0270672	0.0102408	0.0657806	0.0240729	0.019575	0	0.0703516	0.131987	0.0243876	0.0204789	0.020444	0.0286661	0.0686283	0	0.0421197	0.0314656	0	0.0279352	0.0248414
chr11	87091395	87067694	+	TMEM135	circTMEM135	circ3252	0.18758	0.615717			1	1	1	1	1	1			1	1	1	1	0	0.0259721	0	0.0576448	0.0249604	0.0167004	0	0.0604899	0	0.0819264	0.0394684	0	0.11745	0	0.0175879	0.131987	0	0.0102395	0	0.114664	0	0.155387	0	0	0.0275134	0.0558703	0.0124207
chr11	92355404	92352096	+	FAT3	circFAT3	circ3279	-0.849151	0.0220885	down	down_Mturquoise	1	1	1	1	1	1					0	0	0.194329	0.0779162	0.172508	0.0576448	0.162243	0.0501013	0.16492	0.161306	0.252627	0.174094	0.342059	0.469422	0.0978749	0.0737797	0.211055	0.0329968	0.0731628	0.102395	0.674651	0.0286661	0.137257	0.155387	0.224639	0.230748	0.247621	0.139676	0.0372622
chr11	100308468	100297625	+	CNTN5	circCNTN5	circ1561	-0.0951032	0.888214			1	1	1	1	1	1			1		1	0	0.0555224	0.012986	0.0492879	0.0345869	0	0	0	0.0100817	0.00902241	0	0.0263123	0.0361094	0.0587249	0.0122966	0.0351758	0.0164984	0	0	0.020444	0	0.0228761	0	0.0140399	0.0419542	0	0.0279352	0
chr11	107390074	107418287	-	CWF19L2	circCWF19L2	circ1626	-0.157536	0.87366			1	1	1	1	1	1					0	0	0.0416418	0.012986	0	0.0230579	0	0	0.04123	0.0201633	0.0270672	0.0204816	0	0.0722188	0.019575	0	0.0175879	0.0164984	0.0243876	0.0102395	0.020444	0	0.0228761	0	0.0140399	0.0104885	0	0.0139676	0.0248414
chr11	108054955	108046270	+	CUL5	circCUL5	circ1640	-0.0866628	0.646459			1	1	1	1	1	1					0	0	0.0277612	0.0519441	0.0492879	0.0230579	0.0998416	0.0501013	0.061845	0.100817	0.0631569	0.102408	0.0394684	0.0481459	0.0782999	0.0491865	0.0175879	0.0989905	0.0243876	0.102395	0.0408879	0.0859983	0.0457522	0.0776933	0.0561596	0.0419542	0.0275134	0.0419027	0.0248414
chr11	117163892	117152441	+	PAFAH1B2	circPAFAH1B2	circ1774	0.22355	0.797809			1	1	1	1	1	1			1	1	1	1	0.0277612	0	0.0246439	0.0345869	0	0.0167004	0.020615	0	0.00902241	0	0	0.0120365	0	0	0	0.0164984	0	0.0102395	0.020444	0.114664	0.0457522	0	0	0	0.0275134	0.0139676	0
chr11	120409450	120406118	+	ARHGEF12	circARHGEF12_1	circ1822	0.228218	0.312161			1	0	1	0	1	0			1	1	1	1	0.0138806	0.0389581	0.0739318	0.0691737	0	0.0167004	0.020615	0.0100817	0.0270672	0	0	0.0601824	0.0782999	0.0491865	0.0879395	0.0494953	0.0243876	0.0204789	0.0408879	0.0573322	0.0457522	0.0517955	0.0421197	0.0209771	0.0825402	0.0139676	0.0745243
chr11	120477526	120474560	+	ARHGEF12	circARHGEF12_2	circ1856	0.116575	0.581889			1	1	1	1	1	1					0	0	0.0694031	0	0.0492879	0.011529	0.0873614	0	0.226765	0	0	0	0.223654	0.108328	0	0.0614831	0.263818	0.131987	0.0487752	0.143353	0	0.114664	0.183009	0.0776933	0	0.0524427	0.137567	0.111741	0
chr11	120477526	120475340	+	ARHGEF12	circARHGEF12_3	circ1857	-0.0106813	0.752699			1	1	1	1	1	1					0	0	0.0138806	0.012986	0	0.011529	0.0249604	0.0334009	0	0.0100817	0.0180448	0.0409632	0	0.0120365	0.019575	0	0	0.0824921	0	0	0.0408879	0	0	0.0258978	0.0561596	0.0104885	0	0.0279352	0.0124207
chr11	121060085	121045674	+	TBCEL	circTBCEL	circ1867	-0.248149	0.273932			1	1	1	1	1	1			1	1	1	1	0.0138806	0.0259721	0	0	0.0124802	0.0334009	0.020615	0.0100817	0.0180448	0	0.0131561	0.0120365	0	0	0	0.0329968	0.0243876	0	0.020444	0.0859983	0.0228761	0.0258978	0.0561596	0	0.0275134	0.0139676	0.0372622
chr11	129062280	129066868	-	ARHGAP32	circARHGAP32_1	circ1944	0.402797	0.283875		up_Mdarkred	1	1	1	1	1	1			1	1	1	1	0	0	0	0.011529	0.0124802	0	0	0	0.00902241	0.0409632	0.0131561	0.0240729	0.019575	0	0.0175879	0.0329968	0	0	0	0.0286661	0.0228761	0.0258978	0	0.0209771	0.0275134	0.0139676	0.0124207
chr11	129123446	129164427	-	ARHGAP32	circARHGAP32_2	circ1952	0.533739	0.0747482			1	1	1	1	1	1			1	1	1	1	0	0.116874	0.0739318	0.0691737	0	0.0668018	0.04123	0.0201633	0	0.0307224	0	0.324985	0.293625	0.0491865	0.0527637	0.230978	0.219488	0.0614368	0.0613319	0.229329	0.0457522	0	0.0140399	0.230748	0.0550268	0.167611	0
chr11	130260856	130261929	-	ZBTB44	circZBTB44	circ1955	-0.132848	0.42589			1	1	1	1	1	1			1	1	1	1	0.0138806	0.0259721	0.0246439	0.0230579	0.0748812	0.0334009	0	0.0403266	0.0631569	0.051204	0.0657806	0.0601824	0.03915	0.0245932	0.0879395	0.0659937	0	0.0307184	0.0817759	0.0573322	0.0457522	0.0776933	0.0561596	0.0839083	0.0275134	0.0419027	0.0745243
chr12	1028572	1027748	+	ERC1	circERC1_1	circ3602	-0.360137	0.353387		down_Mturquoise	1	1	1	1	1	1			1	1	1	1	0.0138806	0	0	0	0.0499208	0.0167004	0.0824599	0.0403266	0.0451121	0.0307224	0.0394684	0	0.019575	0.0122966	0.0175879	0.0164984	0	0.0511973	0.0408879	0	0.0228761	0.0258978	0.0842395	0.0209771	0.0550268	0.0139676	0.0124207
chr12	1190052	1180540	+	ERC1	circERC1_2	circ3896	-0.372852	0.178962			1	1	1	1	1	1			1	1	1	1	0.0416418	0.0389581	0	0	0.0124802	0.0167004	0	0	0.0180448	0.0307224	0.0263123	0.0120365	0	0.0122966	0.0175879	0	0.0243876	0.0102395	0	0.0573322	0.0228761	0.0517955	0.0842395	0.0104885	0	0.0139676	0
chr12	1290012	1263034	+	ERC1	circERC1_3	circ4128	-0.33412	0.314858			1	1	1	1	1	1			1	1	1	1	0	0.0259721	0.0739318	0.0461158	0	0.0668018	0	0	0.0451121	0	0.0131561	0.0120365	0.0782999	0.0122966	0.0527637	0.0329968	0	0.0102395	0.122664	0	0	0.0258978	0.140399	0	0	0.0139676	0.0248414
chr12	1371977	1289852	+	ERC1	circERC1_4	circ4193	-0.134675	0.444354			1	1	1	1	1	1			1		1	0	0.138806	0.0519441	0.221795	0.0345869	0.0499208	0.0835022	0.12369	0.110898	0.108269	0	0.144717	0.0722188	0.137025	0.0737797	0.123115	0.0659937	0	0.153592	0.10222	0.343993	0.183009	0	0.154439	0.0839083	0.302647	0.0419027	0.0248414
chr12	1444750	1289852	+	ERC1	circERC1_5	circ4214	-0.429165	0.0831702			1	0	1	1	1	1			1		1	0	0.0694031	0.0779162	0	0	0	0.0334009	0	0.0100817	0.0360896	0	0	0.0120365	0	0.0245932	0	0.115489	0	0.0409579	0.020444	0.200663	0	0.207182	0.0421197	0	0.0275134	0.0139676	0
chr12	1444750	1371833	+	ERC1	circERC1_6	circ4215	-0.639241	0.0413029	down	down_Mturquoise	1	1	1	1	1	1					0	0	0.0138806	0.0389581	0.0492879	0	0	0	0.103075	0.030245	0.0270672	0.0102408	0	0	0	0.0368898	0	0	0	0	0.183996	0	0	0.0517955	0.0561596	0.0419542	0.0275134	0.0279352	0
chr12	2512984	2504436	+	CACNA1C	circCACNA1C	circ4449	-0.484486	0.0172204			1	1	1	1	1	1			1	1	1	1	0.0138806	0.012986	0.0246439	0.011529	0.0374406	0.0334009	0	0.0201633	0.0270672	0.0204816	0.0394684	0.0120365	0.0587249	0.0122966	0	0.0824921	0	0.0409579	0.163552	0.0859983	0.114381	0	0	0.0524427	0.0275134	0.0419027	0
chr12	12244262	12244655	-	LRP6	circLRP6	circ3973	0.0717633	0.606085		down_Mturquoise	1	1	1	1	1	1	1	1	1	1	1	1	0.0138806	0.0259721	0.0739318	0	0.0249604	0	0.020615	0.0201633	0.0360896	0.0716856	0.0394684	0.108328	0.03915	0	0.0351758	0.0329968	0.146326	0.0204789	0.020444	0	0.0228761	0.0258978	0.0842395	0.0209771	0.0275134	0.0419027	0.0372622
chr12	22484697	22506819	-	C2CD5	circC2CD5_1	circ4370	-0.14836	0.697258		down_Mturquoise	1	1	1	1	1	1					0	0	0	0	0	0.011529	0.062401	0	0.061845	0.0403266	0	0.0307224	0.0789368	0.0361094	0.0587249	0	0	0.0494953	0.0487752	0.0511973	0.286215	0.0859983	0.0686283	0.0517955	0.0701996	0	0.0825402	0.0558703	0
chr12	22493223	22506819	-	C2CD5	circC2CD5_2	circ4372	-0.237228	0.357773			1	1	1	1	1	1			1		1	0	0	0	0.0246439	0	0	0	0.020615	0.0100817	0.0360896	0.0102408	0.0394684	0	0.019575	0.0122966	0	0.0164984	0.0243876	0	0.020444	0.0286661	0	0	0.0140399	0	0.0275134	0.0139676	0
chr12	27724186	27714780	+	MRPS35	circMRPS35	circ4548	0.175353	0.145952			1	1	1	1	1	1					0	0	0.194329	0.142846	0.12322	0.11529	0.149762	0.0668018	0.04123	0.100817	0.126314	0.13313	0.0526245	0.132401	0.27405	0.0491865	0.0527637	0.362965	0.243876	0.0511973	0.10222	0.286661	0.160133	0.0776933	0.0280798	0.0839083	0.16508	0.279352	0.0621036
chr12	28307749	28305649	+	CCDC91	circCCDC91_1	circ4564	0.243594	0.159239			1	1	1	1	1	1			1		1	0	0.0971643	0.0649301	0.0492879	0.0461158	0.0249604	0.0835022	0.04123	0.0403266	0.0451121	0.0204816	0.0789368	0.168511	0.254475	0.0122966	0.0879395	0.0824921	0.121938	0.0409579	0.0613319	0.286661	0.0457522	0	0.112319	0.136351	0.16508	0.195546	0.0372622
chr12	28391411	28305649	+	CCDC91	circCCDC91_2	circ4572	-0.0571564	0.752802			1	1	1	1	1	1			1	1	1	1	0.0277612	0	0.0492879	0	0	0	0	0.0201633	0.0180448	0	0.0263123	0.0481459	0	0	0	0.0494953	0.0487752	0.0307184	0.0613319	0.0859983	0.0686283	0.0258978	0	0.0209771	0.0550268	0.0419027	0.0248414
chr12	31442775	31447769	-	DENND5B	circDENND5B	circ4711	-0.103791	0.760003		down_Mturquoise	1	1	1	1	1	1					0	0	0.0416418	0.0259721	0.0246439	0	0.0124802	0.0334009	0.0824599	0.030245	0.0360896	0.0409632	0.0394684	0.0120365	0.0587249	0.0122966	0.0175879	0	0	0.0204789	0.0613319	0.0573322	0.0686283	0.0258978	0.0280798	0	0.0275134	0.0558703	0
chr12	32328555	32327461	+	BICD1	circBICD1	circ4735	-0.739323	0.00562574	down	down_Mturquoise	1	1	1	1	1	1			1	1	1	1	0.0277612	0	0	0	0.0374406	0	0.020615	0.0201633	0.0270672	0.0204816	0.0131561	0.0240729	0.019575	0.0122966	0	0.0164984	0.0243876	0.0102395	0.0408879	0.0573322	0.0228761	0.0258978	0.0421197	0	0	0	0.0124207
chr12	40028301	40048210	-	SLC2A13	circSLC2A13	circ5016	0.249861	0.215135		down_Mturquoise	1	1	1	1	1	1	1	1	1	1	1	1	0.0971643	0.0389581	0.12322	0.0345869	0.0873614	0.0334009	0.061845	0.030245	0.0541345	0.112649	0.131561	0.144438	0.0978749	0.0860763	0.140703	0.115489	0.121938	0.112634	0.0817759	0.0573322	0.0228761	0	0.0842395	0.0314656	0.0825402	0.0838055	0.17389
chr12	41029219	41014228	+	CNTN1	circCNTN1	circ5091	-0.189343	0.869491			1	1	1	1	1	1					0	0	0.0138806	0.0259721	0	0	0.0249604	0.0167004	0.061845	0	0.0180448	0.0102408	0.0526245	0.0601824	0.03915	0	0	0	0	0	0.020444	0	0.0457522	0	0.0701996	0.0209771	0.0550268	0	0.0124207
chr12	42210355	42210680	-	YAF2	circYAF2	circ5099	-0.489712	0.0898386			1	1	1	1	1	1					0	0	0	0.0259721	0	0	0.0249604	0.0334009	0	0.0201633	0.0812017	0	0	0.0120365	0.03915	0.0245932	0	0	0.0243876	0.0307184	0.020444	0.0573322	0	0	0.0421197	0.0419542	0.0275134	0.0139676	0.0372622
chr12	42398994	42351885	+	PPHLN1	circPPHLN1	circ5108	-0.105245	0.591945			1	1	1	1	1	1			1	1	1	1	0.111045	0.0779162	0.0492879	0.0230579	0.0499208	0	0.020615	0.0705716	0.135336	0.12289	0.118405	0.0842553	0.0782999	0.0245932	0.0703516	0.148486	0.0487752	0.0307184	0.163552	0.0859983	0.0457522	0	0.0982794	0.0209771	0.0825402	0.0419027	0.0621036
chr12	44665484	44714741	-	NELL2	circNELL2_1	circ5224	0.210871	0.688951			1	1	1	1	1	1	1	1	1	1	1	1	0.0277612	0.012986	0.0739318	0.0230579	0	0	0	0.0201633	0	0	0	0	0	0	0	0.0164984	0.0487752	0	0	0.0573322	0.0457522	0.0776933	0.0140399	0.0209771	0.0550268	0.0419027	0
chr12	44703726	44714741	-	NELL2	circNELL2_2	circ5227	-0.0773146	0.832246		down_Mturquoise	1	1	1	1	1	1	1	1	1	1	1	1	0.0277612	0	0	0.0461158	0.0249604	0	0.04123	0.0201633	0.0451121	0.0409632	0.0394684	0.0361094	0.0587249	0	0	0.0659937	0	0.0511973	0.0817759	0.0286661	0.0457522	0	0.0140399	0.0419542	0	0	0.0248414
chr12	46229153	46243314	-	SLC38A1	circSLC38A1	circ5270	0.442713	0.109562			1	1	1	1	1	1					0	0	0	0.012986	0.0246439	0.0230579	0.0124802	0.0501013	0.020615	0	0.00902241	0.0204816	0.0394684	0.0481459	0.019575	0	0	0.0329968	0	0	0	0.114664	0.0228761	0.0258978	0.0140399	0.0209771	0	0.0139676	0
chr12	48939655	48941188	-	AC073610.3,ARF3	circARF3	circ5309	0.292927	0.563562			1	1	1	1	1	1			1		1	0	0.0555224	0.0779162	0	0.0230579	0.0124802	0.0167004	0.020615	0.0604899	0.0451121	0.0819264	0	0.0361094	0.03915	0.0737797	0.0175879	0	0.0487752	0	0.0613319	0	0	0.388467	0.0140399	0.0839083	0.0825402	0.223481	0
chr12	50809589	50780140	+	ATF1	circATF1	circ5355	0.46726	0.076848		down_Mturquoise	1	1	1	1	1	1			1		1	0	0.0277612	0	0.0739318	0	0.0124802	0	0	0.0201633	0	0.0102408	0.0131561	0.0361094	0.0587249	0	0.0879395	0.0659937	0	0.0307184	0	0.0573322	0.0457522	0	0.0140399	0.0104885	0.0275134	0.0419027	0.0248414
chr12	51751593	51745903	+	SCN8A	circSCN8A	circ5382	-0.0330474	0.985011		down_Mturquoise	1	1	1	1	1	1			1	1	1	1	0.0555224	0	0.0246439	0	0.0124802	0	0.04123	0.030245	0.0360896	0.0307224	0.0263123	0.0240729	0	0	0.0527637	0.0164984	0.0487752	0.0102395	0.10222	0.114664	0.0915045	0	0	0.0314656	0	0.0279352	0.0124207
chr12	69262562	69251129	+	CPSF6	circCPSF6	circ5522	-0.626468	0.0068565	down	down_Mviolet	1	1	1	1	1	1			1	1	1	1	0.0138806	0.0389581	0.0246439	0	0.0249604	0.0167004	0.020615	0.030245	0.0451121	0	0.0131561	0.0240729	0	0.0122966	0.0175879	0.0164984	0.0243876	0.0204789	0	0	0	0	0.0280798	0.0209771	0	0	0.0372622
chr12	69801721	69800209	+	RAB3IP	circRAB3IP	circ5531	0.02546	0.779993			1	1	1	1	1	1					0	0	0	0.0259721	0	0.0807027	0.0249604	0.0334009	0	0.0100817	0.00902241	0.0204816	0.0263123	0.0962918	0.03915	0.0368898	0	0.0329968	0.0731628	0.0102395	0.020444	0.114664	0	0.0517955	0.112319	0.0419542	0.0825402	0.0698379	0.0869451
chr12	70684127	70701323	-	PTPRR	circPTPRR	circ5542	0.11754	0.724064			1	1	1	1	1	1			1	1	1	1	0.0138806	0.0259721	0.0246439	0.0345869	0.0124802	0.0167004	0.020615	0	0.00902241	0.051204	0.0131561	0.0240729	0.019575	0	0.0527637	0.0164984	0.0243876	0.0204789	0	0	0.0228761	0	0.0280798	0.0104885	0	0.0139676	0.0248414
chr12	77968702	77966229	+	NAV3	circNAV3	circ5580	-0.0522073	0.949575		down_Mturquoise	1	1	1	1	1	1			1	1	1	1	0	0	0.0492879	0	0	0.0167004	0.04123	0.0100817	0.0360896	0.0102408	0.0526245	0.0361094	0.03915	0	0.0175879	0.0329968	0	0	0.0613319	0.0286661	0	0	0.0421197	0.0314656	0	0	0
chr12	79299551	79285787	+	SYT1	circSYT1	circ5616	-0.149523	0.39092		down_Mturquoise	1	1	1	1	1	1			1	1	1	1	0.0694031	0.0259721	0	0.0461158	0.0124802	0	0	0.0403266	0.0180448	0	0.0526245	0.0361094	0	0.0122966	0.0175879	0.0659937	0	0	0.0408879	0	0.0915045	0	0.0140399	0	0.0275134	0.0698379	0.0248414
chr12	79793863	79822190	-	PPP1R12A	circPPP1R12A	circ5625	-0.179318	0.523488			1	1	1	1	1	1					0	0	0.0416418	0.0649301	0.0492879	0.0807027	0.0374406	0.0167004	0	0.0604899	0.0360896	0.0307224	0.0526245	0.0842553	0	0.0368898	0.0175879	0.0494953	0	0.0102395	0.0817759	0.0859983	0.0686283	0.0258978	0.0280798	0.0419542	0.0825402	0.0698379	0.0496829
chr12	82857580	82857010	+	TMTC2	circTMTC2	circ5670	-0.00691401	0.588892			1	1	1	1	1	1			1	1	1	1	0.0277612	0.0389581	0.0246439	0.0230579	0	0.0167004	0	0	0	0.0409632	0.0657806	0.0240729	0.03915	0	0.0703516	0.131987	0.0487752	0.0307184	0.0613319	0.257995	0.0228761	0.0258978	0.0561596	0.0524427	0	0.0419027	0.0372622
chr12	89619999	89635251	-	ATP2B1	circATP2B1	circ5755	-0.257539	0.159716			1	1	1	1	1	1					0	0	0.0416418	0	0.0246439	0.0345869	0.0374406	0.0668018	0.020615	0.030245	0.0180448	0.0102408	0.0263123	0.0601824	0	0.0245932	0.0351758	0.0824921	0	0.0409579	0.0817759	0.0286661	0.0686283	0	0.0140399	0.0629312	0	0.0139676	0.0621036
chr12	95208843	95211267	-	FGD6	circFGD6	circ5806	0.0559242	0.86466			1	1	1	1	1	1			1	1	1	1	0.0138806	0.0389581	0	0.0230579	0.0249604	0	0.020615	0.0100817	0.00902241	0.0102408	0.0131561	0.0481459	0.0587249	0	0.0527637	0.0164984	0.0487752	0.0102395	0.0408879	0.0286661	0.0228761	0	0.0140399	0.0419542	0	0.0139676	0.0372622
chr12	97561047	97492461	+	RMST	circRMST	circ5840	0.00488862	0.543607			1	1	1	1	1	1					0	0	0.333135	0.103888	0.320371	0.172934	0.299525	0.0334009	0.226765	0.463756	0.189471	0.184334	0.592026	0.469422	0.43065	0.159856	0.298994	0.84142	0.317039	0.19455	1.12442	1.20398	0.503274	0.336671	0.252718	0.482473	0.412701	0.40506	0.149049
chr12	98773042	98782137	-	ANKS1B	circANKS1B_1	circ5848	0.150662	0.676269			0	0	0	0	0	0					0	0	0.0555224	0	0.0246439	0	0.0249604	0	0	0.0201633	0.0992465	0.0409632	0.0394684	0.0240729	0.019575	0	0.105527	0.0164984	0	0	0	0.0859983	0.0686283	0	0.0280798	0.0209771	0.0275134	0.0558703	0
chr12	98773042	98801125	-	ANKS1B	circANKS1B_2	circ5850	-0.155532	0.807246		up_Mdarkred	1	1	1	1	1	1			1	1	1	1	0.0138806	0.0389581	0.0492879	0.0230579	0	0.0167004	0.020615	0.030245	0.0180448	0.0409632	0	0.0361094	0	0.0122966	0.0175879	0	0.0243876	0.0102395	0	0	0	0	0.0280798	0	0	0.0279352	0.0124207
chr12	99772922	99782097	-	ANKS1B	circANKS1B_3	circ5872	0.331589	0.0547436			1	1	1	1	1	1			1	1	1	1	0.0277612	0.0259721	0.12322	0.0461158	0.062401	0.0167004	0.020615	0.0504083	0.0270672	0.0307224	0.0526245	0.0722188	0.0587249	0.0245932	0.0527637	0.148486	0.0731628	0.0102395	0.10222	0.229329	0.0686283	0.155387	0.0280798	0.0524427	0.137567	0.139676	0.0372622
chr12	99772922	99806700	-	ANKS1B	circANKS1B_4	circ5873	-0.411554	0.411493		down_Mturquoise	1	1	1	1	1	1			1	1	1	1	0.0138806	0	0	0	0	0	0	0.0201633	0.00902241	0.0409632	0.0526245	0.0361094	0	0.0245932	0.0175879	0	0	0.0204789	0.0408879	0	0.0686283	0.0258978	0	0	0	0.0279352	0
chr12	100942535	100922226	+	ANO4	circANO4_1	circ3564	0.468799	0.10813			1	1	1	1	1	1			1	1	1	1	0.0416418	0.168818	0	0.0691737	0.062401	0.0835022	0	0.0100817	0.00902241	0.0102408	0.0131561	0.0842553	0.03915	0.0245932	0.0351758	0.0824921	0.146326	0.0102395	0.0408879	0.0573322	0.0686283	0	0	0.0943969	0	0.125708	0.0372622
chr12	100987670	100922226	+	ANO4	circANO4_2	circ3570	0.199939	0.420028			1	1	1	1	1	1			1	1	1	1	0.0138806	0.0259721	0.0246439	0.011529	0.0124802	0.0334009	0	0.0100817	0.00902241	0.0204816	0.0131561	0.0240729	0.0587249	0.0245932	0	0.0164984	0.0487752	0.0102395	0	0	0	0	0	0.0419542	0.0825402	0.0558703	0.0248414
chr12	100987670	100971306	+	ANO4	circANO4_3	circ3572	-0.0141709	0.971021			1	1	1	1	1	1			1	1	1	1	0	0	0.0492879	0	0	0	0	0	0	0	0	0.0120365	0.03915	0	0	0	0	0	0.020444	0.0573322	0	0	0	0	0.0825402	0.0279352	0
chr12	101780152	101790057	-	GNPTAB	circGNPTAB	circ3594	0.0034055	0.623607			1	1	1	1	1	1			1	1	1	1	0	0	0	0	0.0374406	0	0.020615	0.0201633	0.00902241	0	0.0263123	0.0120365	0.019575	0.0122966	0.0351758	0	0	0	0.0408879	0.0859983	0.0228761	0	0.0421197	0.0314656	0	0	0
chr12	106843947	106842589	+	RIC8B	circRIC8B	circ3650	0.0212673	0.930786			1	1	1	1	1	1	1		1		1	0	0	0.0519441	0	0.0345869	0	0.0167004	0	0	0.00902241	0.0204816	0	0.0120365	0.019575	0	0.0175879	0.0494953	0.0243876	0.0204789	0.020444	0	0.0228761	0.0258978	0.0280798	0.0104885	0	0.0139676	0
chr12	108652272	108654410	-	CORO1C	circCORO1C	circ3674	-0.0980939	0.634997			1	1	1	1	1	1					0	0	0.0832837	0.0389581	0.0739318	0.0345869	0.0998416	0.0501013	0.185535	0.18147	0.117291	0.0614448	0.118405	0.108328	0.11745	0.0245932	0.0879395	0.0989905	0	0.0921552	0.163552	0.229329	0.160133	0.0776933	0.140399	0.0524427	0.0275134	0.0419027	0.0372622
chr12	110487943	110485078	+	FAM216A	circFAM216A	circ3752	-0.735483	0.0498655	down	down_Mturquoise	1	1	1	1	1	1			1		1	0	0	0.012986	0	0.0230579	0.0374406	0	0.020615	0.030245	0.00902241	0.0102408	0.0131561	0	0	0	0	0	0	0.0102395	0	0	0.0228761	0.0517955	0	0	0	0	0
chr12	111552280	111555919	-	ATXN2	circATXN2	circ3784	-0.118137	0.721361			1	1	1	1	1	1			1	1	1	1	0.0277612	0.012986	0.0985758	0.011529	0.0873614	0.0167004	0.04123	0	0	0	0.105249	0.0722188	0.019575	0.0245932	0.0879395	0.0329968	0.0243876	0	0	0.315327	0	0	0.0842395	0.0209771	0	0.0419027	0.0248414
chr12	111933886	111943369	-	TMEM116	circTMEM116	circ3807	0.0331856	0.84561			1	1	1	1	1	1					0	0	0.0138806	0	0.0246439	0	0	0.0334009	0	0.0201633	0	0.0102408	0.0263123	0	0.019575	0	0	0	0	0	0.122664	0.0286661	0	0	0.0421197	0	0	0.0139676	0
chr12	112319225	112319742	-	HECTD4	circHECTD4	circ3852	-0.211181	0.533889		down_Mturquoise	1	1	1	1	1	1			1	1	1	1	0.0138806	0	0	0.0230579	0.0124802	0.0167004	0.020615	0.0403266	0.0180448	0.0204816	0.0131561	0.0481459	0	0.0122966	0.0175879	0.0164984	0.0243876	0.0307184	0.0408879	0.0859983	0	0	0.0421197	0.0209771	0.0275134	0.0139676	0.0124207
chr12	120154970	120155719	-	GCN1	circGCN1	circ3911	-0.12572	0.406427		down_Mturquoise	1	1	1	1	1	1			1	1	1	1	0	0.012986	0	0.0230579	0.062401	0.0167004	0	0.0201633	0.0541345	0.0307224	0.0263123	0.0240729	0.019575	0	0.0879395	0.0659937	0.0243876	0.0204789	0.020444	0.0573322	0	0.0258978	0.0280798	0.0104885	0.0275134	0.0279352	0.0124207
chr12	123498544	123499536	-	RILPL1	circRILPL1	circ4043	0.12739	0.554865			1	1	1	1	1	1					0	0	0.0416418	0.0389581	0.0246439	0.0576448	0.0124802	0.0501013	0.020615	0.0201633	0.0180448	0.0102408	0.0263123	0.0962918	0.0978749	0	0.0527637	0.0824921	0.0731628	0	0.020444	0.0573322	0.0915045	0	0.0140399	0.0104885	0.0825402	0.0279352	0.0248414
chr12	124419957	124430787	-	NCOR2	circNCOR2	circ4063	0.210716	0.338043		down_Mturquoise	1	1	1	1	1	1					0	0	0.0138806	0	0	0.0230579	0	0	0	0.0100817	0.0360896	0.0307224	0	0.0120365	0.019575	0	0	0	0	0.0102395	0	0.0286661	0	0	0.0140399	0.0524427	0.110054	0.0139676	0
chr12	129699810	129700698	-	TMEM132D	circTMEM132D	circ4131	0.00469878	0.842465			1	1	1	1	1	1	1	1	1	1	1	1	0.0138806	0.0649301	0.0739318	0.0576448	0.0249604	0.0835022	0	0.0201633	0.0270672	0.0409632	0	0.0240729	0.019575	0	0.0175879	0.148486	0.0731628	0.0307184	0.265772	0.0573322	0.0915045	0.0258978	0	0.0314656	0	0.0279352	0.0993658
chr12	130399679	130422561	-	RIMBP2	circRIMBP2	circ4133	-0.35782	0.19346			1	1	1	1	1	1	1	1	1	1	1	1	0.0138806	0.012986	0.0246439	0	0	0.0334009	0.020615	0.0201633	0.0180448	0.0204816	0	0.0361094	0.019575	0	0	0	0	0.0204789	0	0.0859983	0	0	0.0280798	0.0524427	0	0	0.0248414
chr13	20067390	20051433	+	ZMYM2	circZMYM2	circ6066	0.715128	0.038107	up		1	1	1	1	1	1			1		1	0	0.0277612	0.012986	0	0	0	0.0167004	0	0.030245	0.0180448	0	0	0.0361094	0.019575	0.0122966	0	0.0164984	0.0243876	0.0102395	0	0	0.0228761	0.0258978	0.0140399	0.0314656	0	0.0279352	0
chr13	25774959	25769046	+	ATP8A2	circATP8A2	circ6168	0.48323	0.083193			1	1	1	1	1	1			1	1	1	1	0	0	0	0.0345869	0.0249604	0.0167004	0.020615	0.0100817	0.00902241	0.0307224	0.0263123	0.0240729	0.03915	0.0245932	0	0.0494953	0.0243876	0.0204789	0.0817759	0	0.0457522	0	0.0561596	0	0	0	0.0124207
chr13	26353880	26337567	+	CDK8	circCDK8	circ6185	0.29174	0.510763			1	1	1	1	1	1	1	1	1	1	1	1	0.0555224	0	0	0	0.0124802	0	0.04123	0.0403266	0.0180448	0	0.0394684	0.0240729	0.019575	0	0.0351758	0.0164984	0.0243876	0.0204789	0.0817759	0.114664	0.0457522	0.0258978	0.0140399	0	0	0	0
chr13	28261458	28256292	+	PAN3	circPAN3	circ6206	-0.0963962	0.797171			1	1	1	1	1	1			1		1	0	0.0416418	0	0	0	0.0124802	0	0	0.0100817	0.0270672	0.0409632	0.0263123	0	0.019575	0	0.0351758	0	0.0243876	0	0.020444	0.0573322	0	0.0258978	0.0280798	0	0	0.0139676	0.0124207
chr13	32517857	32527532	-	N4BP2L2	circN4BP2L2	circ6272	0.352345	0.0178056			1	1	1	1	1	1	1				1	0	0.124926	0.116874	0.369659	0.126818	0.0873614	0.167004	0.0824599	0.18147	0.180448	0.276502	0.302591	0.433313	0.450225	0.11067	0.228643	0.412461	0.292651	0.174071	0.306659	0.802651	0.388894	0.23308	0.196559	0.125862	0.385188	0.293319	0
chr13	39727548	39694634	+	COG6	circCOG6	circ6365	0.0684817	0.790251		down_Mturquoise	1	1	1	1	1	1					0	0	0.0694031	0.0259721	0.0739318	0	0.0374406	0	0.04123	0.0604899	0.108269	0.0204816	0.105249	0.0120365	0	0.0245932	0.0527637	0.0494953	0	0.0511973	0.10222	0.0573322	0.160133	0.103591	0.0421197	0.0734198	0	0	0.0124207
chr13	42190525	42168440	+	DGKH	circDGKH	circ6415	0.0512432	0.606026			1	1	1	1	1	1					0	0	0.0138806	0.0519441	0.0739318	0.011529	0.0249604	0.0334009	0.061845	0.0201633	0.0541345	0.0307224	0.0394684	0.0120365	0.019575	0.0122966	0.0351758	0.0659937	0.0975504	0	0	0	0.0457522	0.0517955	0.0421197	0.0104885	0.0825402	0.0419027	0
chr13	46003139	46020557	-	ZC3H13	circZC3H13_1	circ6457	0.0950894	0.893229			1	1	1	1	1	1			1		1	0	0	0	0	0.011529	0.0374406	0	0	0.0201633	0.00902241	0	0.0131561	0.0361094	0.03915	0	0.105527	0	0	0	0.020444	0.143331	0.0457522	0	0.0140399	0	0	0	0.0124207
chr13	46003139	46045513	-	ZC3H13	circZC3H13_2	circ6458	0.122263	0.553298			1	1	1	1	1	1			1	1	1	1	0	0.012986	0.0246439	0.011529	0.0249604	0	0	0.0100817	0	0.0102408	0.0263123	0.0120365	0	0	0	0	0.0243876	0.0102395	0.0408879	0	0	0	0.0140399	0.0209771	0.0275134	0.0139676	0.0248414
chr13	46003139	46045516	-	ZC3H13	circZC3H13_3	circ6459	0.122263	0.553298			1	1	1	1	1	1			1		1	0	0	0.012986	0.0246439	0.011529	0.0249604	0	0	0.0100817	0	0.0102408	0.0263123	0.0120365	0	0	0	0	0.0243876	0.0102395	0.0408879	0	0	0	0.0140399	0.0209771	0.0275134	0.0139676	0.0248414
chr13	46733998	46723221	+	LRCH1	circLRCH1	circ6466	0.0941526	0.974963			1	1	1	1	1	1			1	1	1	1	0	0.012986	0.0492879	0.0345869	0.0249604	0	0	0	0	0	0.0263123	0	0.0587249	0	0	0	0.0243876	0.0102395	0	0.0286661	0	0.0258978	0.0280798	0.0209771	0.0275134	0.0139676	0
chr13	49175541	49167244	+	FNDC3A	circFNDC3A_1	circ6481	-0.0169513	0.907732			1	1	1	1	1	1					0	0	0	0.012986	0.0492879	0	0.0124802	0.0334009	0	0.0100817	0.0180448	0	0.0263123	0.0240729	0	0.0122966	0.0351758	0.0164984	0.0243876	0.0307184	0.020444	0.0286661	0.0228761	0.0517955	0	0.0104885	0	0	0
chr13	49198574	49196877	+	FNDC3A	circFNDC3A_2	circ6490	-0.425404	0.538317		down_Mturquoise	1	1	1	1	1	1					0	0	0.0138806	0	0.0492879	0.011529	0	0.0167004	0	0.030245	0.0451121	0.0307224	0.0394684	0	0	0.0245932	0.0175879	0	0	0.0102395	0.0408879	0	0.0457522	0	0.0280798	0	0.0275134	0	0.0248414
chr13	50949505	50927407	+	RNASEH2B	circRNASEH2B	circ6515	-0.0580768	0.680636			1	1	1	1	1	1					0	0	0.0694031	0	0.0492879	0.011529	0	0.0334009	0.04123	0.0403266	0.108269	0.0409632	0.0131561	0.0722188	0.019575	0	0.0527637	0	0.0731628	0.0102395	0.224884	0.143331	0.205885	0.0517955	0.0280798	0	0	0.0279352	0
chr13	60467379	60439688	+	TDRD3	circTDRD3	circ6580	0.0283471	0.82237			1	1	1	1	1	1			1	1	1	1	0.0694031	0.0259721	0.12322	0.0576448	0.0249604	0.0167004	0.144305	0	0.0360896	0.0409632	0.0920929	0.0962918	0.11745	0	0	0	0	0.0204789	0.0613319	0.200663	0.114381	0.0517955	0	0.0314656	0	0.0558703	0.0372622
chr13	75569507	75560753	+	AL137782.1,UCHL3	circRP11-29G8.3	circ6625	0.0563956	0.93106		down_Mturquoise	1	1	1	1	1	1			1	1	1	1	0	0	0	0.0230579	0.0124802	0	0.04123	0	0.00902241	0	0.0263123	0.0240729	0	0	0.0351758	0	0	0	0.0408879	0	0.0686283	0	0	0	0.0275134	0.0279352	0
chr13	77746855	77719532	+	SLAIN1	circSLAIN1_1	circ6669	-0.0474808	0.769059			1	1	1	1	1	1			1	1	1	1	0	0.012986	0.0246439	0	0.0249604	0.0167004	0.020615	0.0201633	0	0	0	0.0120365	0	0	0	0.0494953	0	0	0	0.0573322	0.0915045	0.0258978	0	0	0.0275134	0	0
chr13	77753358	77719532	+	SLAIN1	circSLAIN1_2	circ6672	-0.250964	0.292628			1	1	1	1	1	1					0	0	0.0832837	0.0259721	0.0492879	0.0230579	0.0499208	0.0334009	0.0824599	0.12098	0.0451121	0.0614448	0.0526245	0.0601824	0.0587249	0.0245932	0.175879	0.0659937	0.0487752	0.0409579	0.143108	0.229329	0.388894	0.0258978	0.0561596	0.0943969	0.0825402	0.097773	0.0124207
chr13	79341123	79344794	-	RBM26	circRBM26	circ6685	0.169516	0.410117			1	1	1	1	1	1			1		1	0	0.0277612	0.012986	0	0.011529	0.0374406	0.0167004	0	0.0403266	0.0360896	0.0204816	0.0394684	0.0361094	0.0978749	0	0.0175879	0.0164984	0.0975504	0.0204789	0	0.171997	0.0686283	0	0.0280798	0.0209771	0.0550268	0.0419027	0
chr13	95763953	95757644	+	DNAJC3	circDNAJC3	circ6739	-0.00559339	0.817903			1	1	1	1	1	1					0	0	0	0.0259721	0	0.0461158	0.0499208	0.0167004	0.020615	0.030245	0.0360896	0.0204816	0.0394684	0	0.019575	0.0245932	0.140703	0.0164984	0	0.0204789	0.163552	0.0573322	0.114381	0.0776933	0.0280798	0.0104885	0.0825402	0.0139676	0.0496829
chr13	99244624	99238427	+	UBAC2	circUBAC2	circ6787	0.268552	0.318385			1	1	1	1	1	1	1	1	1	1	1	1	0.0277612	0	0	0.011529	0	0	0.020615	0	0.0180448	0.0102408	0.0131561	0.0240729	0.019575	0.0122966	0	0	0.0243876	0	0	0.0286661	0	0.0517955	0.0280798	0.0629312	0	0.0558703	0.0124207
chr13	100273346	100257595	+	PCCA	circPCCA_1	circ5885	0.0156415	0.942692			1	1	1	1	1	1	1	1	1	1	1	1	0.0416418	0.0259721	0.0492879	0	0.0249604	0.0167004	0	0.0201633	0.0270672	0.0102408	0.0263123	0.0601824	0.03915	0.0122966	0.0703516	0.0494953	0.0731628	0.0204789	0.020444	0.171997	0.0457522	0	0.0421197	0.0314656	0	0.097773	0
chr13	100449305	100301460	+	PCCA	circPCCA_2	circ5918	-0.564248	0.0466941	down	down_Mturquoise	1	0	1	1	1	1					0	0	0.0138806	0	0	0	0	0	0.061845	0.0201633	0	0.0921672	0.0131561	0.0601824	0.0782999	0.0368898	0.0703516	0	0	0.0307184	0.0817759	0.0286661	0.0457522	0	0.0561596	0.0524427	0.0275134	0.0698379	0.0124207
chr13	101229393	101399165	-	NALCN	circNALCN_1	circ5946	-0.273662	0.40546			0	0	1	1	1	1					0	0	0.0138806	0	0	0	0.0249604	0	0	0.0100817	0.0180448	0.0204816	0	0.0240729	0.03915	0	0	0.0164984	0	0.0102395	0.0613319	0	0	0.0517955	0.0280798	0	0.0275134	0	0
chr13	101345266	101378653	-	NALCN	circNALCN_2	circ5960	-0.53438	0.0284693	down	down_Mturquoise	1	1	1	1	1	1					0	0	0.0416418	0	0.0739318	0	0	0.0334009	0.020615	0.0100817	0.00902241	0.0102408	0.0131561	0.0240729	0	0.0245932	0.0175879	0.0164984	0	0	0.020444	0.0573322	0.0228761	0	0.0140399	0.0104885	0	0	0.0124207
chr13	101345266	101399165	-	NALCN	circNALCN_3	circ5962	-0.0934892	0.877126			1	1	1	1	1	1	1	1	1	1	1	1	0.0832837	0.0389581	0	0.011529	0.0873614	0.100203	0.020615	0.0201633	0.0721793	0.051204	0.0657806	0.0722188	0.019575	0	0	0.0494953	0	0.0307184	0.10222	0	0	0	0.0701996	0.0314656	0.0550268	0	0.0248414
chr13	101376700	101399165	-	NALCN	circNALCN_4	circ5967	-0.233486	0.462823		down_Mturquoise	1	1	1	1	1	1	1	1	1	1	1	1	0.0971643	0.012986	0.0246439	0	0.0124802	0.0167004	0.04123	0.0201633	0.0721793	0.051204	0.0263123	0.0240729	0	0.0122966	0.0351758	0.0164984	0	0.0307184	0.143108	0.257995	0.0915045	0.0517955	0.0140399	0.0419542	0.0275134	0	0.0496829
chr13	101868725	101875296	-	FGF14	circFGF14	circ5969	-0.0163887	0.807671			1	1	1	1	1	1			1	1	1	1	0.0138806	0	0.0246439	0.011529	0.0374406	0.0167004	0	0	0.00902241	0.0102408	0.0131561	0.0361094	0	0.0122966	0.0175879	0	0	0.0511973	0.020444	0	0.0457522	0	0.0140399	0	0	0.0139676	0
chr13	111233293	111205289	+	ARHGEF7	circARHGEF7	circ5999	0.674832	0.0373109	up	down_Mturquoise	1	1	1	1	1	1	1	1	1	1	1	1	0.0416418	0.012986	0.0739318	0	0	0	0.020615	0.0201633	0.0270672	0.0307224	0.0263123	0	0	0	0	0.0329968	0	0.0204789	0.0613319	0.0286661	0.0915045	0.0258978	0.0421197	0.0419542	0.0275134	0	0
chr13	112516440	112527484	-	TUBGCP3	circTUBGCP3	circ6009	0.30739	0.329412			1	1	1	1	1	1	1	1	1	1	1	1	0	0	0.0492879	0	0.0124802	0	0	0.0201633	0	0.0204816	0.0131561	0.0481459	0.019575	0	0	0.0989905	0.0975504	0	0	0.0573322	0.0228761	0.0258978	0.0140399	0.0104885	0.0275134	0.0139676	0.0124207
chr14	21503173	21503881	-	METTL3	circMETTL3	circ6960	0.281835	0.0605532			1	1	1	1	1	1					0	0	0.0277612	0	0	0.0461158	0	0	0	0.0504083	0.0180448	0.0102408	0.0657806	0.0481459	0.0782999	0	0	0.0164984	0.0731628	0	0.0408879	0.0859983	0.0686283	0.0517955	0.0280798	0.0209771	0.0550268	0.0838055	0.0124207
chr14	22909483	22911403	-	RBM23	circRBM23	circ6974	-0.414021	0.264867			1	1	1	1	1	1					0	0	0.0138806	0.0259721	0	0.0230579	0.0124802	0.0167004	0	0.0403266	0.0360896	0.0307224	0	0.0120365	0	0.0368898	0.0175879	0.0164984	0	0.0102395	0.0817759	0.0859983	0.0228761	0	0.0140399	0.0104885	0.0275134	0.0139676	0
chr14	32094386	32090502	+	ARHGAP5	circARHGAP5	circ7077	0.0291788	0.974363			1	1	1	1	1	1	1	1	1	1	1	1	0	0.0649301	0	0	0	0	0.020615	0.0201633	0	0	0.0131561	0.0361094	0.0587249	0	0.0351758	0.0164984	0	0	0.10222	0	0	0.0517955	0.0140399	0.0419542	0.0550268	0	0.0621036
chr14	33215587	33215182	+	NPAS3	circNPAS3	circ7097	0.38613	0.113963			1	1	1	1	1	1	1	1			1	1	0.0555224	0	0.0739318	0.161405	0	0.0334009	0.061845	0.0403266	0.0451121	0.051204	0	0.156474	0	0.0245932	0.0879395	0.0824921	0	0.0511973	0	0	0.0228761	0.0517955	0	0.0524427	0.0275134	0.0698379	0
chr14	39179462	39179091	+	PNN	circPNN	circ7163	-0.105347	0.882883			1	1	1	1	1	1					0	0	0.0277612	0.0259721	0.0492879	0.0691737	0	0.0668018	0.020615	0.0201633	0.00902241	0	0.0394684	0.0120365	0.03915	0.0122966	0	0.0329968	0.0487752	0.0204789	0.0613319	0.171997	0	0	0.0842395	0.0104885	0.0825402	0.0279352	0.0248414
chr14	46920012	47035304	-	MDGA2	circMDGA2	circ7211	0.523482	0.0754479		down_Mturquoise	0	0	1	1	1	1	1	1	1	1	1	1	0.0277612	0.0259721	0	0.011529	0	0	0	0.030245	0.0451121	0.0204816	0.0263123	0.0120365	0.019575	0.0122966	0.0879395	0.0164984	0.0487752	0.0409579	0.0817759	0.0286661	0.0228761	0	0.0280798	0	0.0550268	0.0419027	0.0372622
chr14	49795791	49831361	-	NEMF	circNEMF_1	circ7234	-0.394473	0.243054		down_Mturquoise	1	1	1	1	1	1					0	0	0.0416418	0.0649301	0	0	0.0873614	0.0334009	0.020615	0.0504083	0.0541345	0.0307224	0.0657806	0	0.03915	0.0368898	0.0703516	0.0494953	0.0243876	0.0204789	0	0	0	0	0.0561596	0.0629312	0	0.0419027	0
chr14	49825867	49831361	-	NEMF	circNEMF_2	circ7245	-0.27157	0.457683			1	1	1	1	1	1					0	0	0.0416418	0.0649301	0.0492879	0.0345869	0.0499208	0.0334009	0.0824599	0.0907349	0.0451121	0.0716856	0.105249	0.0481459	0.11745	0.0245932	0.0703516	0.0329968	0	0.0204789	0.183996	0.0573322	0.205885	0.0517955	0.112319	0.0104885	0.0275134	0.0698379	0.0248414
chr14	50150008	50150230	-	SOS2	circSOS2	circ7270	-0.070704	0.847165			1	1	1	1	1	1			1		1	0	0.0277612	0.0259721	0.0492879	0.0230579	0	0	0.020615	0.0100817	0.0270672	0.0204816	0.0526245	0.0722188	0.0587249	0.0245932	0.0351758	0.0659937	0	0.0204789	0.020444	0.114664	0.0228761	0.0258978	0.0280798	0.0209771	0.0275134	0.0558703	0.0124207
chr14	51022835	51025360	-	TRIM9	circTRIM9	circ7326	0.414484	0.392091			1	1	1	1	1	1					0	0	0	0	0	0.0345869	0	0	0	0	0.00902241	0	0.0526245	0	0	0.0368898	0.0527637	0	0	0.0204789	0	0.171997	0	0	0.0561596	0	0.0275134	0	0.0372622
chr14	52536719	52544371	-	TXNDC16	circTXNDC16	circ7344	-0.380839	0.257768			1	1	1	1	1	1					0	0	0.0138806	0.012986	0	0	0.0124802	0.0501013	0	0.030245	0.00902241	0	0.0131561	0	0	0	0	0	0.0243876	0	0.163552	0.0286661	0.0686283	0.0258978	0.0561596	0	0.0275134	0.0558703	0.0248414
chr14	54702580	54702062	+	SAMD4A	circSAMD4A	circ7362	-0.100281	0.771998			1	1	1	1	1	1	1	1	1	1	1	1	0.0138806	0.012986	0	0	0	0.0167004	0.020615	0.0100817	0	0.0102408	0.0263123	0	0	0.0122966	0.0703516	0.0164984	0	0.0204789	0.0408879	0	0	0.0258978	0.0421197	0.0104885	0	0	0.0124207
chr14	56636598	56585001	+	TMEM260	circTMEM260	circ7384	-0.0324853	0.974418			1	0	1	1	1	1					0	0	0.0277612	0	0	0.0345869	0.062401	0.0167004	0.04123	0.030245	0.0631569	0.051204	0.0526245	0.0601824	0.0978749	0.0122966	0	0.0329968	0.0243876	0.0204789	0.0408879	0.0859983	0	0	0.0140399	0.104885	0.0550268	0.0279352	0.0124207
chr14	60818847	60796217	+	MNAT1	circMNAT1_1	circ7436	-0.290365	0.47079			1	1	1	1	1	1			1	1	1	1	0	0	0	0.0230579	0.0124802	0	0	0	0.00902241	0	0	0	0	0.0122966	0.0351758	0.0164984	0.0243876	0	0.0408879	0	0.0915045	0	0	0.0209771	0	0.0139676	0
chr14	60879835	60796217	+	MNAT1	circMNAT1_2	circ7440	-0.396314	0.211064		down_Mturquoise	1	1	1	1	1	1	1	1	1	1	1	1	0.0138806	0.0389581	0.0492879	0.0576448	0	0.0334009	0	0.0705716	0	0.0409632	0.0131561	0.0120365	0	0	0.0175879	0.0329968	0	0.0102395	0	0.0286661	0	0	0.0561596	0	0.0275134	0.0279352	0.0248414
chr14	60879835	60811987	+	MNAT1	circMNAT1_3	circ7443	0.341616	0.116242			1	1	1	1	1	1	1		1	1	1	1	0.0416418	0.0649301	0.0492879	0.0807027	0.0374406	0.0334009	0.061845	0.0504083	0.0360896	0.0307224	0.0789368	0.0481459	0.0587249	0.0122966	0	0	0	0.0102395	0.0613319	0.143331	0	0.129489	0.0140399	0.0629312	0.0275134	0.0279352	0
chr14	65561766	65561337	+	FUT8	circFUT8	circ7480	-0.244581	0.0415432			1	1	1	1	1	1	1	1	1	1	1	1	0.124926	0.155832	0.320371	0.126818	0.124802	0.0334009	0.12369	0.201633	0.171426	0.112649	0.184186	0.337021	0.0978749	0.0245932	0.281406	0.346467	0.317039	0.102395	0.265772	0.773985	0.274513	0.284875	0.140399	0.188794	0.440214	0.139676	0.0372622
chr14	67303599	67269701	+	MPP5	circMPP5	circ7509	0.0178376	0.55392		down_Mturquoise	1	1	1	1	1	1			1	1	1	1	0.0416418	0.0649301	0.0492879	0.0691737	0.112322	0	0.061845	0.0403266	0.0721793	0.0307224	0.184186	0.144438	0	0.0368898	0.0175879	0.0494953	0	0.0511973	0.224884	0.0573322	0.114381	0.0517955	0.126359	0	0.0275134	0	0
chr14	71529370	71413948	+	SIPA1L1	circSIPA1L1	circ7555	-0.0467364	0.90211			0	0	1	1	1	1	1	1	1		1	1	0.0277612	0.0259721	0	0	0.0124802	0	0	0.0100817	0.0360896	0.0204816	0.0131561	0.0120365	0	0	0	0.0164984	0	0	0.0408879	0.0286661	0.0228761	0.0258978	0.0140399	0.0104885	0.0275134	0.0139676	0.0124207
chr14	73148094	73147795	+	PSEN1	circPSEN1	circ7580	-0.170517	0.414924			1	1	1	1	1	1					0	0	0	0.0259721	0	0.011529	0.0374406	0	0.04123	0.030245	0.0360896	0.0102408	0.0526245	0	0.019575	0	0	0.0494953	0	0.0204789	0	0.0573322	0	0	0.0280798	0.0209771	0	0	0
chr14	75046376	75049718	-	MLH3	circMLH3	circ7626	-0.431347	0.214532			1	1	1	1	1	1					0	0	0.0138806	0	0.0246439	0	0.0374406	0.0334009	0.020615	0.0100817	0.0451121	0.0716856	0.0394684	0	0.03915	0.0122966	0	0.0164984	0.0243876	0.0307184	0.020444	0	0	0.0517955	0	0.0314656	0.0825402	0.0279352	0
chr14	88437903	88416711	+	SPATA7	circSPATA7	circ7733	-0.380408	0.540172			1	1	1	1	1	1					0	0	0.0416418	0	0	0.0230579	0.0124802	0	0.0824599	0.0100817	0.0270672	0.0204816	0.0263123	0.0240729	0.03915	0.0245932	0.123115	0.0329968	0.0243876	0.0204789	0	0.171997	0.0228761	0.0517955	0	0	0.0275134	0.0279352	0
chr14	88726541	88754671	-	EML5	circEML5	circ7761	-0.0554892	0.982257		down_Mturquoise	1	1	1	1	1	1			1	1	1	1	0.0138806	0	0.0246439	0.011529	0.0124802	0	0.061845	0.030245	0.0180448	0	0	0.0240729	0	0	0.0351758	0	0.0243876	0.0511973	0.0408879	0	0	0	0.112319	0.0314656	0	0	0
chr14	91481576	91485730	-	PPP4R3A	circPPP4R3A	circ7811	-0.0763813	0.930821			1	1	1	1	1	1					0	0	0	0.0519441	0.0739318	0.0576448	0.0748812	0.0334009	0.04123	0.030245	0	0.0614448	0.144717	0.168511	0.0587249	0.0122966	0.0527637	0.148486	0.0243876	0.0716763	0	0.171997	0.0228761	0.0776933	0.154439	0.0419542	0.16508	0.0838055	0.0248414
chr14	93497286	93467671	+	UNC79	circUNC79	circ7852	0.864012	0.00516052	up		1	1	1	1	1	1	1	1	1	1	1	1	0.0277612	0.0649301	0.0492879	0	0	0.0334009	0.020615	0	0	0.051204	0.0263123	0.0240729	0.019575	0	0.0703516	0.0164984	0	0.0307184	0	0.0573322	0.0686283	0.0517955	0	0	0	0	0.0124207
chr14	96556413	96555847	+	PAPOLA	circPAPOLA	circ7884	0.065875	0.683304			1	1	1	1	1	1					0	0	0.0138806	0.0259721	0.147864	0.0576448	0	0.0334009	0.061845	0.0705716	0.00902241	0.0102408	0.0263123	0.0361094	0.0978749	0	0.0527637	0.0494953	0.0731628	0.0307184	0.122664	0.143331	0.0457522	0	0.0701996	0.0209771	0.0275134	0.0558703	0.0372622
chr14	96860735	96833467	+	VRK1	circVRK1	circ7886	-0.601902	0.0834584		down_Mturquoise	1	1	1	1	1	1			1		1	0	0.0416418	0	0	0.0230579	0.0124802	0	0.04123	0.030245	0.0721793	0.0204816	0.0263123	0.0240729	0	0.0122966	0.0351758	0.0329968	0	0.0409579	0.0613319	0.0573322	0.0457522	0	0.0140399	0.0104885	0	0.0139676	0.0124207
chr14	99458279	99465813	-	SETD3	circSETD3	circ7894	0.140825	0.644811			1	1	1	1	1	1			1	1	1	1	0.0555224	0.181804	0.320371	0.11529	0.0124802	0.150304	0.061845	0.0705716	0.0451121	0.143371	0.144717	0.288875	0.27405	0.0614831	0.0879395	0.412461	0.341426	0.0819157	0.0613319	0.630655	0.114381	0.207182	0.126359	0.188794	0.275134	0.279352	0.161469
chr14	102022880	102019893	+	DYNC1H1	circDYNC1H1_1	circ6877	0.717068	0.0277373	up		1	1	1	1	1	1					0	0	0.0138806	0.012986	0	0.011529	0	0	0.020615	0.0100817	0.0360896	0.0307224	0.0394684	0.0120365	0	0.0122966	0.0175879	0	0	0.0307184	0	0.0286661	0	0.0258978	0	0.0314656	0	0	0
chr14	102040673	102040236	+	DYNC1H1	circDYNC1H1_2	circ6879	0.181075	0.496282			1	1	1	1	1	1					0	0	0.0971643	0.012986	0.0739318	0.0691737	0.0499208	0.0835022	0.04123	0.030245	0.0721793	0.12289	0.0657806	0.0361094	0.019575	0.0245932	0.0879395	0.0329968	0.0975504	0.0819157	0.0408879	0.200663	0.0457522	0.0776933	0.154439	0.0524427	0.16508	0.0279352	0.0496829
chr14	103778745	103797518	-	PPP1R13B	circPPP1R13B	circ6930	-0.035515	0.958305		down_Mturquoise	1	1	1	1	1	1	1	1	1	1	1	1	0.0138806	0.012986	0.0492879	0.011529	0.0124802	0.0167004	0.061845	0.0201633	0.0451121	0.0204816	0.0131561	0.0240729	0	0.0245932	0.0351758	0.0659937	0	0.0511973	0.143108	0.0573322	0.0457522	0	0.0561596	0.0209771	0.0275134	0.0419027	0.0248414
chr15	25278884	25266431	+	SNHG14	circSNHG14	circ8047	0.00533274	0.888963			1	1	1	1	1	1					0	0	0	0.012986	0.0492879	0.011529	0	0	0.020615	0.0504083	0.00902241	0.0307224	0	0.0240729	0.03915	0	0	0	0.0487752	0.0102395	0.0408879	0	0.0228761	0.0517955	0	0.0104885	0	0.0419027	0
chr15	27328888	27326809	+	GABRG3	circGABRG3	circ8058	0.366033	0.413729			1	1	1	1	1	1			1	1	1	1	0.0138806	0	0.0246439	0	0.0249604	0	0	0.0201633	0	0.051204	0	0.0120365	0.019575	0.0245932	0.175879	0.0329968	0.0243876	0	0.10222	0.0286661	0	0	0.0280798	0	0	0	0.0124207
chr15	29761139	29773357	-	TJP1	circTJP1	circ8101	0.0578806	0.930947			1	1	1	1	1	1	1	1	1	1	1	1	0.0832837	0.012986	0.147864	0.0345869	0.0873614	0.0167004	0.0824599	0.0806532	0.0451121	0.051204	0.0526245	0.0601824	0.03915	0.0122966	0.123115	0.0164984	0.0243876	0.0409579	0.143108	0.343993	0.297389	0.0517955	0.0421197	0.0209771	0.0550268	0.0279352	0.0248414
chr15	32857015	32902040	-	FMN1	circFMN1_1	circ8123	-0.031066	0.835664			1	1	1	1	1	1			1		1	0	0	0	0.147864	0.0922316	0.0748812	0.0501013	0.04123	0.0705716	0	0.0204816	0	0	0.0782999	0.0245932	0.0351758	0.181483	0.0487752	0	0	0	0.0228761	0.129489	0.0561596	0.0943969	0.137567	0.181579	0.0372622
chr15	32888172	32902040	-	FMN1	circFMN1_2	circ8126	0.0363804	0.73225		down_Mturquoise	1	0	1	0	1	0			1	1	1	1	0.0832837	0	0.0739318	0.011529	0.0374406	0	0.04123	0.0504083	0.0541345	0.0204816	0.0394684	0.0240729	0.019575	0.0122966	0.0175879	0.0824921	0.0243876	0.0614368	0.0613319	0.0573322	0	0	0	0	0.0550268	0.0698379	0
chr15	33153048	33155045	-	FMN1	circFMN1_3	circ8137	-0.225876	0.570178		down_Mturquoise	1	1	1	1	1	1			1	1	1	1	0.0832837	0.0389581	0.221795	0.0807027	0.112322	0	0.04123	0.141143	0.0721793	0.13313	0.197342	0.228693	0.019575	0.0368898	0.0351758	0	0.0731628	0.0921552	0.122664	0.0286661	0.114381	0.0776933	0.112319	0.0943969	0.330161	0.153643	0.0372622
chr15	34915038	34927138	-	AQR	circAQR	circ8154	0.460544	0.132988			1	1	1	1	1	1					0	0	0	0	0.0492879	0	0	0	0.020615	0.030245	0.0180448	0.0102408	0.0526245	0.0240729	0.019575	0	0	0.0494953	0.0243876	0	0.020444	0.171997	0.0457522	0.0517955	0	0.0209771	0	0	0.0248414
chr15	38502312	38505920	-	RASGRP1	circRASGRP1	circ8173	-0.123914	0.523184		down_Mturquoise	1	1	1	1	1	1					0	0	0.0277612	0.0389581	0.0246439	0.0230579	0	0	0	0	0	0	0.0131561	0	0	0.0122966	0.0175879	0	0	0.0102395	0	0.114664	0.0228761	0	0.0421197	0.0209771	0	0.0139676	0.0124207
chr15	40744047	40745259	-	RMDN3	circRMDN3	circ8201	0.294497	0.223531		down_Mturquoise	1	1	1	1	1	1					0	0	0.0138806	0	0	0.0230579	0.0499208	0	0.020615	0.0403266	0.00902241	0.0307224	0.0394684	0	0	0.0245932	0.0175879	0.0164984	0	0	0.0613319	0	0.0228761	0.0258978	0.0140399	0	0.0825402	0.0279352	0
chr15	41669958	41668828	+	MGA	circMGA_1	circ8229	-0.42435	0.068454		down_Mturquoise	1	1	1	1	1	1	1	1	1	1	1	1	0	0	0.0246439	0	0.0499208	0.0167004	0.061845	0	0.00902241	0	0.0263123	0.0240729	0	0.0122966	0.0175879	0.0164984	0	0.0204789	0	0	0.0457522	0.0258978	0.0140399	0.0104885	0	0.0139676	0.0621036
chr15	41699159	41696075	+	MGA	circMGA_2	circ8232	-0.104109	0.564221			1	1	1	1	1	1			1	1	1	1	0.124926	0.0519441	0	0.0230579	0.137282	0	0.061845	0.0806532	0.171426	0.0819264	0.118405	0.0722188	0.0978749	0.0860763	0.105527	0.0329968	0.0731628	0.0204789	0.183996	0.229329	0.114381	0.0776933	0.210599	0.0839083	0.0825402	0.0838055	0.0496829
chr15	42260958	42268032	-	TMEM87A	circTMEM87A	circ8243	0.0204247	0.708936			1	1	1	1	1	1			1		1	0	0	0.0389581	0.0492879	0.011529	0	0	0.020615	0.0201633	0.00902241	0.0204816	0.0131561	0.0120365	0.0587249	0.0122966	0.0351758	0	0	0	0.0613319	0.0573322	0.0228761	0	0.0280798	0.0104885	0.0275134	0.0279352	0.0124207
chr15	42827928	42840433	-	TTBK2	circTTBK2	circ8267	-0.150246	0.634172		down_Mturquoise	1	1	1	1	1	1			1	1	1	1	0.0416418	0.0259721	0.0492879	0.0576448	0.0873614	0	0.0824599	0.0907349	0.117291	0.0921672	0.17103	0.0722188	0.0978749	0.0491865	0.0879395	0.0164984	0.0731628	0.0921552	0.122664	0.0859983	0.0915045	0.0258978	0.140399	0.0419542	0	0.0139676	0.0124207
chr15	44380976	44331988	+	CASC4	circCASC4	circ8332	-0.253067	0.331695			1	1	1	1	1	1			1		1	0	0	0.0259721	0.0246439	0	0.0499208	0.0334009	0.04123	0.030245	0.0270672	0.0409632	0.0394684	0.0361094	0.0587249	0.0245932	0.0527637	0.0164984	0	0.0409579	0.10222	0	0	0.0258978	0.0280798	0	0.0275134	0	0.0248414
chr15	49292537	49235851	+	GALK2	circGALK2	circ8381	-0.133995	0.659952			1	1	1	1	1	1					0	0	0.0138806	0	0.0246439	0	0.0249604	0.0167004	0.020615	0.0201633	0.00902241	0.0204816	0.0263123	0.0120365	0.0587249	0	0.0175879	0.0329968	0	0.0102395	0.020444	0.0859983	0.0457522	0.0258978	0	0.0104885	0.110054	0.0139676	0.0248414
chr15	50631417	50663046	-	TRPM7	circTRPM7	circ8434	-0.297496	0.227217			1	1	1	1	1	1					0	0	0.0277612	0.012986	0.0246439	0	0	0	0.020615	0.0100817	0.0270672	0.051204	0	0	0	0.0368898	0.0175879	0.0329968	0.0731628	0	0.020444	0.0573322	0.0457522	0	0.0561596	0.0314656	0.0275134	0	0.0621036
chr15	51535663	51547408	-	DMXL2	circDMXL2	circ8468	-0.28616	0.64467		down_Mturquoise	1	1	1	1	1	1			1	1	1	1	0.0138806	0.012986	0	0	0.0374406	0	0.04123	0.0201633	0.0180448	0.051204	0.0263123	0.0120365	0	0	0.0175879	0	0	0	0.0613319	0.0286661	0.0457522	0	0.0421197	0	0.0275134	0	0
chr15	51777018	51766373	+	TMOD2	circTMOD2_1	circ8473	-0.0417335	0.725812			1	1	1	1	1	1					0	0	0.0416418	0	0.0246439	0.011529	0.0499208	0.0167004	0.061845	0.0100817	0.0180448	0	0.0394684	0.0240729	0	0	0.0175879	0.0494953	0	0	0.0408879	0.0573322	0	0	0.0280798	0.0104885	0.0550268	0.0279352	0
chr15	51782828	51781044	+	TMOD2	circTMOD2_2	circ8478	0.332588	0.175937			1	1	1	1	1	1					0	0	0.111045	0.0259721	0.0739318	0.0461158	0.0124802	0	0.020615	0.0403266	0.0541345	0.0307224	0.0789368	0.0722188	0	0.0368898	0.0351758	0.0329968	0.0243876	0.0511973	0.020444	0.0286661	0.0228761	0.0258978	0.0561596	0.0209771	0.0825402	0.0139676	0.0496829
chr15	51902036	51869217	+	TMOD3	circTMOD3	circ8487	0.861494	0.0394283	up	down_Mturquoise	1	1	1	1	1	1			1		1	0	0	0.012986	0.0246439	0.0345869	0.0124802	0.0501013	0	0.030245	0.00902241	0.0102408	0.0131561	0.0120365	0.03915	0	0.0175879	0.0164984	0	0.0102395	0.020444	0	0.0228761	0.0517955	0.0421197	0.0104885	0.0825402	0.0139676	0
chr15	54338489	54293895	+	UNC13C	circUNC13C	circ8516	-0.227379	0.362511			1	1	1	1	1	1			1	1	1	1	0	0.012986	0.0246439	0.0345869	0.0124802	0	0	0	0	0	0.0131561	0	0.019575	0	0.0175879	0.0164984	0	0.0204789	0.0408879	0	0	0	0.0140399	0.0314656	0.0275134	0.0279352	0
chr15	59031702	59030804	+	RNF111	circRNF111	circ8571	0.366802	0.201527		down_Mturquoise	1	1	1	1	1	1			1	1	1	1	0.0277612	0.012986	0.0492879	0.0345869	0	0	0	0	0.0180448	0	0	0.0481459	0.019575	0.0122966	0	0.0494953	0.0487752	0	0.020444	0.0286661	0.0228761	0	0.0140399	0	0.0275134	0.0419027	0
chr15	59195461	59218087	-	MYO1E	circMYO1E	circ8578	0.257302	0.431735			1	1	1	1	1	1					0	0	0.0138806	0	0	0	0.0124802	0.0167004	0.061845	0.0705716	0	0.0102408	0.0263123	0.0120365	0	0	0	0.0329968	0	0	0.020444	0.0859983	0.0686283	0.0258978	0	0.0104885	0.0275134	0	0.0248414
chr15	62007308	62013992	-	VPS13C	circVPS13C_1	circ8598	-0.187581	0.325388			1	1	1	1	1	1					0	0	0.194329	0.0779162	0.295727	0.0691737	0.287044	0.0334009	0.4123	0.312531	0.22556	0.225298	0.460464	0.20462	0.27405	0.135263	0.246231	0.247476	0.170713	0.255987	0.367991	0.573322	0.274513	0.181284	0.701996	0.0839083	0.357674	0	0.0496829
chr15	62020479	62044255	-	VPS13C	circVPS13C_2	circ8602	-0.242746	0.482328		down_Mturquoise	1	1	1	1	1	1					0	0	0.0277612	0	0	0.011529	0	0.0167004	0	0.0100817	0.00902241	0.0102408	0	0.0120365	0	0	0.0175879	0.0329968	0	0.0204789	0.0408879	0	0.0228761	0.0517955	0.0280798	0.0209771	0.192594	0.0419027	0
chr15	63696124	63716473	-	HERC1	circHERC1_1	circ8638	-0.484011	0.0148052		down_Mturquoise	1	1	1	1	1	1					0	0	0.263732	0.0649301	0.246439	0.0922316	0.224644	0.0501013	0.267995	0.342776	0.351874	0.194575	0.460464	0.20462	0.11745	0.0860763	0.158291	0.0989905	0.121938	0.174071	0.367991	0.343993	0.228761	0.181284	0.421197	0.136351	0.357674	0.111741	0.0372622
chr15	63706780	63716473	-	HERC1	circHERC1_2	circ8642	-0.34514	0.186656			1	1	1	1	1	1			1		1	0	0.0138806	0.0519441	0.0246439	0	0	0.0334009	0.04123	0.0100817	0	0.0102408	0	0	0.019575	0.0245932	0.0175879	0.0494953	0.0243876	0	0.0817759	0	0	0	0.0701996	0.0104885	0.0275134	0.0279352	0.0124207
chr15	64500166	64499293	+	ZNF609	circZNF609	circ8675	-0.0108051	0.957996			1	1	0	0	1	1			1	1	1	1	0.111045	0.116874	0.271083	0.103761	0.137282	0.0501013	0.0824599	0.0705716	0.108269	0.163853	0.131561	0.108328	0.176175	0.0245932	0.105527	0.148486	0.121938	0.0409579	0.20444	0.114664	0.0686283	0.207182	0.0982794	0.0629312	0.220107	0.139676	0.0993658
chr15	65178934	65180204	-	CLPX	circCLPX	circ8694	-0.294551	0.241946			1	1	1	1	1	1					0	0	0	0	0	0.0230579	0.0249604	0	0.020615	0.0201633	0.00902241	0	0.0394684	0.0120365	0	0	0.0351758	0.0164984	0.0243876	0.0102395	0.020444	0.0286661	0	0.0258978	0.0421197	0.0209771	0.0275134	0.0279352	0
chr15	65715478	65756472	-	DENND4A	circDENND4A	circ8728	-0.431787	0.0656049			1	1	1	1	1	1					0	0	0.0832837	0	0.0246439	0	0	0	0.020615	0.0504083	0.0721793	0	0	0	0	0.0491865	0.0175879	0	0	0.0819157	0.0613319	0.0573322	0.0457522	0	0.0561596	0.0524427	0.0825402	0	0.0124207
chr15	67231814	67236820	-	AAGAB	circAAGAB	circ8758	-0.145817	0.629347		down_Mturquoise	1	1	1	1	1	1			1	1	1	1	0.0416418	0.0259721	0.0739318	0.011529	0.0249604	0.0501013	0.16492	0.100817	0.0451121	0.0716856	0.0394684	0.0361094	0.0978749	0.0122966	0.0175879	0.0659937	0	0.0511973	0.122664	0.0859983	0.183009	0.0258978	0.0701996	0.0314656	0.0550268	0.0279352	0.0124207
chr15	70984257	70919050	+	LRRC49	circLRRC49	circ8821	0.0237366	0.957661			1	1	1	1	1	1					0	0	0.0416418	0	0.0246439	0.0230579	0.0249604	0.0167004	0.020615	0	0.0180448	0.0307224	0.0263123	0	0	0.0245932	0.0175879	0.0329968	0.0243876	0.0102395	0	0	0	0	0.0280798	0	0	0	0
chr15	72007826	72027793	-	MYO9A	circMYO9A_1	circ8867	0.0473948	0.989997			1	1	1	1	1	1					0	0	0.0138806	0	0.0492879	0.0230579	0.0124802	0	0	0.0100817	0	0	0	0.0361094	0.03915	0	0.0175879	0	0.0487752	0	0	0	0	0	0	0.0314656	0	0.0279352	0
chr15	72045724	72046634	-	MYO9A	circMYO9A_2	circ8873	-0.230718	0.598322			1	1	1	1	1	1			1	1	1	1	0	0.012986	0.0492879	0	0.0374406	0	0.020615	0.0100817	0.00902241	0	0.0263123	0.0481459	0.0782999	0	0.0351758	0.0164984	0	0.0102395	0	0.0859983	0.0228761	0	0	0.0209771	0.0275134	0.0139676	0.0124207
chr15	74926766	74929232	-	COX5A	circCOX5A	circ8911	0.0748837	0.979064		down_Mturquoise	1	1	1	1	1	1			1	1	1	1	0	0	0	0.011529	0.0124802	0	0.020615	0.0403266	0.0360896	0.0102408	0.0131561	0.0361094	0.019575	0	0	0	0	0.0409579	0	0.0286661	0	0	0.0701996	0.0314656	0	0.0139676	0.0248414
chr15	76274412	76295737	-	ETFA	circETFA	circ8943	0.159929	0.431507			1	1	1	1	1	1			1		1	0	0.0277612	0.012986	0	0.0230579	0	0	0	0.0201633	0.0360896	0.0204816	0.0263123	0.0361094	0.019575	0	0.0351758	0.0329968	0.0487752	0	0.10222	0.0573322	0	0	0	0.0104885	0.0550268	0.0419027	0.0124207
chr15	77252367	77286504	-	PEAK1	circPEAK1	circ8984	-0.0100404	0.958139			1	1	1	1	1	1					0	0	0.0138806	0.012986	0.0246439	0.0345869	0	0	0	0.030245	0.00902241	0	0.0394684	0.0240729	0	0	0	0.0164984	0	0.0102395	0.0408879	0.0573322	0.0228761	0	0.0280798	0.0524427	0	0	0
chr15	77471814	77467095	+	HMG20A	circHMG20A	circ8988	0.00966766	0.668509		down_Mturquoise	1	1	1	1	1	1			1		1	0	0	0	0.0246439	0.0230579	0.0374406	0.0167004	0.020615	0.0100817	0.0270672	0.0409632	0.0263123	0.0120365	0.019575	0	0.0351758	0	0	0	0.020444	0.0286661	0	0	0	0.0209771	0.0275134	0.0139676	0.0124207
chr15	82688736	82689453	-	AP3B2	circAP3B2	circ9032	-0.121172	0.774898			1	1	1	1	1	1	1	1	1	1	1	1	0.0416418	0.0389581	0.0246439	0.011529	0.0249604	0.0501013	0	0.0201633	0.0270672	0.0204816	0.0394684	0	0.03915	0.0491865	0.0175879	0.0164984	0.0731628	0	0.0817759	0.0286661	0.0457522	0.0776933	0.0421197	0.0524427	0	0.0279352	0.0496829
chr15	83151215	83158041	-	HDGFL3	circRP11-382A20.3	circ9035	-0.0912891	0.635441			1	1	1	1	1	1	1	1	1	1	1	1	0.0277612	0	0.0492879	0.0230579	0.0124802	0	0.020615	0	0.00902241	0.0307224	0	0.0601824	0.03915	0	0.0527637	0.0494953	0.0243876	0.0204789	0.020444	0.143331	0.183009	0	0.0280798	0	0.0550268	0	0.0496829
chr15	83576741	83559253	+	SH3GL3	circSH3GL3_1	circ9042	0.213004	1			1	1	1	1	1	1			1	1	1	1	0.0277612	0.012986	0	0	0.0249604	0.0334009	0.0824599	0.0201633	0.0180448	0.0204816	0.0394684	0.0481459	0.019575	0	0	0.0164984	0	0.0102395	0.0613319	0.0573322	0.0915045	0	0.0140399	0.0209771	0.0825402	0	0
chr15	83588771	83559253	+	SH3GL3	circSH3GL3_2	circ9044	-0.224284	0.247629			1	1	1	1	1	1			1	1	1	1	0.0555224	0	0.147864	0.0345869	0.0748812	0.0668018	0.020615	0.0504083	0.0270672	0.0716856	0.0394684	0.0722188	0	0.0122966	0.0351758	0.0494953	0.0243876	0.0307184	0.122664	0.286661	0.0457522	0.103591	0.0842395	0.0314656	0.110054	0.0838055	0.0496829
chr15	85067204	85064370	+	PDE8A	circPDE8A_1	circ9063	0.446403	0.117837		up_Mdarkred	1	1	1	1	1	1			1	1	1	1	0.0277612	0	0	0	0	0	0.020615	0.0403266	0.0360896	0	0.0263123	0	0.019575	0	0	0	0	0	0	0.0573322	0	0	0.0140399	0	0	0.0558703	0
chr15	85121014	85113873	+	PDE8A	circPDE8A_2	circ9079	-0.202018	0.648875			1	1	1	1	1	1					0	0	0	0.012986	0	0	0.0124802	0.0167004	0.061845	0	0	0.0204816	0.0394684	0.0240729	0.0587249	0.0122966	0.0527637	0.0164984	0	0.0102395	0.0817759	0.0573322	0.0686283	0	0.0280798	0	0	0.0139676	0
chr15	87929191	87940753	-	NTRK3	circNTRK3	circ9107	-0.22106	0.223851			1	1	1	1	1	1	1	1	1	1	1	1	0.0138806	0.012986	0.0492879	0.011529	0	0.0501013	0.020615	0.0403266	0.00902241	0.051204	0.0263123	0.0481459	0.03915	0.0245932	0.0175879	0.0494953	0.0975504	0	0.0408879	0.0286661	0.0915045	0.0517955	0.0140399	0.0839083	0.0550268	0.0698379	0.0496829
chr15	89116521	89113725	+	ABHD2	circABHD2_1	circ9116	0.00728209	0.893233			1	1	1	1	1	1	1	1	1	1	1	1	0.0971643	0.0519441	0.0492879	0.011529	0.0998416	0.0334009	0.061845	0.0201633	0.0992465	0.0204816	0.118405	0.108328	0.19575	0.0245932	0.123115	0.0329968	0.0975504	0.0102395	0.143108	0.171997	0.0457522	0.103591	0.0982794	0.0314656	0.137567	0.0698379	0.0248414
chr15	89155534	89113725	+	ABHD2	circABHD2_2	circ9118	-0.236145	0.487354		down_Mturquoise	1	1	1	1	1	1			1		1	0	0.0555224	0.0259721	0.0246439	0.011529	0.0873614	0	0.04123	0.0504083	0.0631569	0.0307224	0.0526245	0.0120365	0.019575	0	0.105527	0.0329968	0.0243876	0.0307184	0.163552	0.0573322	0.0457522	0.0517955	0.0701996	0.0629312	0.0825402	0.0558703	0
chr15	90443478	90441506	+	IQGAP1	circIQGAP1	circ9139	0.296462	0.345388			1	1	1	1	1	1					0	0	0.0138806	0	0	0	0.0124802	0	0	0.0100817	0.0270672	0	0	0.0120365	0.03915	0	0	0.0329968	0.0487752	0.0204789	0	0	0.0228761	0	0	0.0104885	0.0275134	0.0279352	0.0248414
chr15	91268605	91251819	+	SV2B	circSV2B	circ9162	-0.254165	0.448871		down_Mturquoise	1	1	1	1	1	1			1	1	1	1	0.0277612	0.012986	0	0.011529	0	0	0.020615	0.0100817	0.0180448	0	0.0263123	0.0240729	0	0	0	0.0329968	0	0	0	0.0286661	0.0228761	0.0258978	0.0421197	0	0	0.0558703	0.0124207
chr15	92929091	92924321	+	CHD2,AC013394.1	circCHD2_1	circ9175	-0.0358044	0.835927			1	1	1	1	1	1			1	1	1	1	0	0	0.0246439	0.011529	0	0	0.061845	0.0100817	0	0.0204816	0.0263123	0.0120365	0	0	0	0.0164984	0.0243876	0	0	0.0573322	0.0457522	0	0.0140399	0.0209771	0.0275134	0.0419027	0.0124207
chr15	93002317	92996957	+	CHD2	circCHD2_2	circ9210	-0.113005	0.76671			1	1	1	1	1	1			1		1	0	0	0	0.0492879	0	0	0.0334009	0.04123	0.0201633	0	0	0.0263123	0.0601824	0.0782999	0.0245932	0	0	0	0.0102395	0.020444	0.0859983	0.0228761	0.0776933	0	0.0209771	0.0550268	0.0419027	0
chr15	101235082	101235577	-	CHSY1	circCHSY1	circ7939	-0.0858504	0.822352			1	1	1	1	1	1			1	1	1	1	0	0.0389581	0.0492879	0	0.0124802	0	0	0	0.0451121	0	0.0263123	0.0120365	0.03915	0	0.0351758	0.0329968	0.121938	0	0.0408879	0.0859983	0	0	0.0561596	0.0524427	0.0275134	0.0139676	0
chr16	1809238	1809833	-	HAGH	circHAGH	circ9373	0.253935	0.176315			1	1	1	1	1	1					0	0	0.0277612	0	0	0.011529	0.062401	0.0167004	0.0824599	0.0100817	0.0451121	0.051204	0.0394684	0.0722188	0.0587249	0.0122966	0.0527637	0.0164984	0.0731628	0.0409579	0.020444	0.143331	0	0.0258978	0.182519	0.0209771	0	0.0419027	0.0248414
chr16	2319581	2319840	-	ABCA3	circABCA3	circ9491	0.27013	0.472311		up_Mdarkred	1	1	1	1	1	1					0	0	0	0.012986	0	0	0	0	0	0.0100817	0.0180448	0	0.0263123	0.0361094	0.0587249	0.0122966	0	0	0	0.0204789	0.020444	0.0573322	0	0	0	0.0104885	0	0.0279352	0
chr16	3850297	3851009	-	CREBBP	circCREBBP	circ9624	0.125739	0.46138			1	1	1	1	1	1	1	1	1	1	1	1	0.0555224	0.0649301	0	0.0345869	0.0249604	0	0.061845	0.030245	0.00902241	0.0409632	0.0131561	0.0601824	0.019575	0.0122966	0	0.0659937	0.0731628	0.0204789	0.0408879	0.0859983	0.0228761	0.0258978	0.0421197	0.0734198	0	0.0698379	0.0372622
chr16	7607338	7579777	+	RBFOX1	circRBFOX1_1	circ10021	-0.432674	0.0780211			1	1	1	1	1	1			1		1	0	0.0277612	0.0389581	0.0246439	0.011529	0.0748812	0	0.020615	0.030245	0.0541345	0.051204	0.0526245	0.0361094	0	0	0.0351758	0.0989905	0.0731628	0.0307184	0.143108	0.0859983	0.0686283	0	0.0280798	0	0.0825402	0.0838055	0
chr16	7607338	7579780	+	RBFOX1	circRBFOX1_2	circ10022	-0.432674	0.0780211			1	1	1	1	1	1					0	0	0.0277612	0.0389581	0.0246439	0.011529	0.0748812	0	0.020615	0.030245	0.0541345	0.051204	0.0526245	0.0361094	0	0	0.0351758	0.0989905	0.0731628	0.0307184	0.143108	0.0859983	0.0686283	0	0.0280798	0	0.0825402	0.0838055	0
chr16	17258988	17259498	-	XYLT1	circXYLT1	circ9366	0.0634585	0.829017		up_Mdarkred	1	1	1	1	1	1			1	1	1	1	0.0138806	0.012986	0	0.0230579	0	0	0	0.0100817	0.00902241	0.0204816	0.0263123	0.0120365	0.03915	0	0.0175879	0.0329968	0	0	0	0.0573322	0.0228761	0.0258978	0	0.0209771	0.0275134	0	0.0248414
chr16	19647882	19616114	+	C16orf62	circC16orf62	circ9419	-0.242491	0.515887			1	1	1	1	1	1					0	0	0.0416418	0.0259721	0.0246439	0.011529	0.0124802	0	0.061845	0.030245	0.0270672	0.051204	0.0263123	0.0120365	0	0	0.0351758	0.0329968	0	0	0.020444	0.0859983	0	0	0	0.0104885	0.0550268	0	0.0124207
chr16	23102319	23108183	-	USP31	circUSP31	circ9485	-0.119147	0.946614			1	1	1	1	1	1					0	0	0	0	0	0	0.0499208	0	0.020615	0.030245	0.0270672	0.0614448	0.0789368	0.0361094	0	0	0.0351758	0	0	0	0.0613319	0	0.0228761	0	0.0842395	0.0104885	0	0.0419027	0
chr16	24035547	24032136	+	PRKCB	circPRKCB_1	circ9504	0.345802	0.103581		down_Mturquoise	1	1	1	1	1	1	1	1	1	1	1	1	0.0555224	0.0389581	0.0985758	0.0230579	0.0249604	0.0167004	0	0.100817	0.0541345	0.0204816	0.0657806	0.0361094	0.0978749	0.0245932	0.0351758	0.0329968	0.0243876	0.0409579	0.0613319	0.0286661	0	0.0517955	0.0561596	0.0839083	0.0275134	0.0139676	0
chr16	24123981	24092791	+	PRKCB	circPRKCB_2	circ9511	-0.159345	0.566369			0	0	1	1	1	1	1		1	1	1	1	0.0277612	0.012986	0	0.011529	0.0124802	0	0.020615	0	0.00902241	0	0	0.0240729	0.019575	0	0	0	0	0	0	0.0286661	0.0228761	0	0	0	0	0.0558703	0.0124207
chr16	29906127	29905788	+	ASPHD1	circASPHD1	circ9586	0.185426	0.357531			1	1	1	1	1	1					0	0	0.0416418	0.12986	0	0.0461158	0.0873614	0.0167004	0	0.0705716	0.0631569	0.0409632	0.0657806	0.0722188	0.11745	0.0122966	0.123115	0.0659937	0.0975504	0.0511973	0.0408879	0.0573322	0.160133	0.0258978	0.154439	0	0.0550268	0.125708	0.0372622
chr16	47109483	47132025	-	NETO2	circNETO2	circ9660	0.131239	0.908012			1	1	1	1	1	1			1		1	0	0.0416418	0.0389581	0	0.0230579	0.0124802	0.0167004	0.020615	0.0201633	0.0180448	0.0409632	0.0526245	0.0361094	0.0782999	0.0245932	0.0175879	0.0659937	0	0.0204789	0.0408879	0.0859983	0	0	0.154439	0.0104885	0.0550268	0.0279352	0.0496829
chr16	47515601	47497399	+	PHKB	circPHKB_1	circ9670	0.111458	0.629292			1	1	1	1	1	1	1	1	1	1	1	1	0.0694031	0.0259721	0.197152	0.011529	0.0748812	0.0668018	0.16492	0.0907349	0.0360896	0.0716856	0.210498	0.0722188	0.03915	0.0368898	0.105527	0.0329968	0.0243876	0.0614368	0.265772	0.229329	0.320266	0	0.0982794	0.0524427	0.137567	0.0419027	0.0124207
chr16	47596531	47497399	+	PHKB	circPHKB_2	circ9676	-0.269512	0.505486		down_Mturquoise	1	1	1	1	1	1	1	1	1	1	1	1	0	0.012986	0.0492879	0	0.0249604	0	0	0.0504083	0.0270672	0.051204	0.0526245	0.0120365	0.019575	0	0	0.0164984	0	0.0307184	0.0408879	0	0.0686283	0.0258978	0	0.0314656	0.0550268	0.0279352	0.0124207
chr16	48303305	48256610	+	LONP2	circLONP2_1	circ9698	-0.100261	0.932228			1	1	1	1	1	1			1		1	0	0.0138806	0.012986	0	0	0	0.0334009	0	0.030245	0	0.0102408	0.0131561	0.0120365	0.0587249	0	0	0.0494953	0.0487752	0.0102395	0.020444	0	0	0	0	0.0314656	0.0275134	0	0
chr16	48303305	48277338	+	LONP2	circLONP2_2	circ9701	-0.444283	0.140006			1	1	1	1	1	1	1		1	1	1	1	0	0	0	0	0	0	0	0.0100817	0.0180448	0.0102408	0	0.0120365	0	0	0	0.0329968	0	0.0102395	0.020444	0.0286661	0	0	0	0.0314656	0	0	0
chr16	53888951	53873786	+	FTO	circFTO	circ9774	-0.0807769	0.602785			1	1	1	1	1	1	1	1	1	1	1	1	0.0971643	0.168818	0.172508	0.0576448	0.062401	0.217106	0.16492	0.161306	0	0.13313	0.118405	0	0.137025	0	0.0527637	0.21448	0.0975504	0.0921552	0.224884	0	0	0.181284	0	0.14684	0	0.0698379	0.0993658
chr16	56355081	56351384	+	GNAO1	circGNAO1	circ9784	0.06075	0.527417			1	1	1	1	1	1			1	1	1	1	0.0277612	0.012986	0	0	0	0	0.0824599	0.030245	0.0180448	0.0102408	0.0263123	0.0120365	0.03915	0	0.0175879	0.0494953	0.0243876	0.0102395	0	0.0573322	0.0457522	0.0258978	0.0140399	0.0104885	0.0550268	0.0139676	0
chr16	67612121	67610824	+	CTCF	circCTCF	circ9854	0.0194987	0.973286		down_Mturquoise	1	1	1	1	1	1					0	0	0	0	0.0246439	0.011529	0.0124802	0	0.020615	0	0.0360896	0.0307224	0.0131561	0.0240729	0.019575	0	0.0175879	0.0329968	0	0.0102395	0.0613319	0.0286661	0.0228761	0	0.0701996	0	0.0275134	0	0.0248414
chr16	68123121	68121987	+	NFATC3	circNFATC3	circ9865	-0.807221	0.0519888			1	1	1	1	1	1	1	1	1	1	1	1	0	0	0.0246439	0	0	0	0	0	0.0360896	0	0	0.0120365	0.019575	0	0.0351758	0.0164984	0.0243876	0	0.0408879	0.0573322	0.0228761	0	0.0140399	0	0.0275134	0	0
chr16	69284244	69284048	+	SNTB2	circSNTB2	circ9913	0.0361788	0.877908		down_Mturquoise	1	1	1	1	1	1					0	0	0	0.012986	0.0246439	0	0.0124802	0	0	0.0201633	0.00902241	0	0.0131561	0	0.03915	0	0.0175879	0.0164984	0	0.0204789	0.020444	0.0286661	0.0228761	0	0.0140399	0.0314656	0	0	0
chr16	69370483	69372355	-	TERF2	circTERF2	circ9918	0.0628951	0.775128			1	1	1	1	1	1	1	1	1		1	1	0.0277612	0.012986	0.0492879	0	0.0124802	0.0334009	0.04123	0	0.0270672	0.0204816	0.0394684	0.0361094	0.019575	0.0122966	0.0175879	0.0494953	0.0243876	0.0204789	0.0817759	0.114664	0.0686283	0.0517955	0.0280798	0	0.0550268	0.0139676	0
chr16	80684538	80685129	-	CDYL2	circCDYL2	circ10052	-0.0854337	0.411525			1	1	1	1	1	1	1	1	1	1	1	1	0.0277612	0.103888	0.147864	0.0576448	0.0873614	0.0167004	0.020615	0.0403266	0.0812017	0.051204	0.105249	0.0481459	0.0978749	0.0737797	0.0879395	0.115489	0.146326	0.102395	0.0817759	0.257995	0.137257	0	0.126359	0.0629312	0.330161	0.0838055	0.0496829
chr17	4282798	4296814	-	UBE2G1	circUBE2G1	circ10662	-0.27159	0.48266			1	1	1	1	1	1					0	0	0	0.0259721	0	0.0230579	0	0	0	0	0.00902241	0	0.0131561	0	0	0.0122966	0.0175879	0.0164984	0.0243876	0.0102395	0.0408879	0	0.0686283	0	0	0	0.0825402	0.0279352	0
chr17	8238031	8238629	-	CTC1	circCTC1	circ11311	-0.142953	0.942869			1	1	1	1	1	1					0	0	0.0277612	0.012986	0	0	0	0	0	0.030245	0.0360896	0.0204816	0.0131561	0.0120365	0	0	0.0175879	0	0	0.0204789	0.0408879	0.0573322	0.0228761	0.0258978	0.0280798	0.0209771	0	0.0279352	0
chr17	9940126	9946983	-	GAS7	circGAS7	circ11368	-0.046242	0.89538			1	1	1	1	1	1					0	0	0.152687	0.0779162	0.12322	0.138347	0.0499208	0	0.103075	0.0504083	0.0812017	0.0921672	0.184186	0.108328	0.19575	0.0122966	0.0527637	0.0659937	0.219488	0	0.0408879	0.143331	0.0915045	0.0258978	0.0701996	0.0943969	0.0825402	0.0698379	0.0869451
chr17	20110562	20017987	+	SPECC1	circSPECC1_1	circ10321	0.491688	0.102519		down_Mturquoise	1	1	1	1	1	1					0	0	0.0138806	0	0	0	0	0	0.04123	0	0	0.0409632	0.0263123	0.0601824	0	0.0122966	0.0175879	0.0329968	0.0487752	0.0204789	0.0408879	0	0.0457522	0.0258978	0.0280798	0.0209771	0	0	0.0124207
chr17	20205912	20204333	+	SPECC1	circSPECC1_2	circ10323	-0.343081	0.00972656			1	1	1	1	1	1	1	1	1	1	1	1	0.194329	0.116874	0.295727	0.103761	0.137282	0.0167004	0.061845	0.0604899	0.0270672	0.0204816	0.118405	0.240729	0.03915	0.11067	0.0527637	0.0659937	0.0731628	0.143353	0.183996	0.257995	0.0686283	0.23308	0.0982794	0.0734198	0.137567	0.097773	0.186311
chr17	28172618	28122603	+	NLK	circNLK_1	circ10360	-0.0735897	0.966934		up_Mdarkred	1	1	1	1	1	1			1	1	1	1	0.111045	0.103888	0.12322	0.0807027	0.0748812	0.0668018	0.04123	0.0806532	0.135336	0.0921672	0.118405	0.120365	0.0587249	0.0614831	0.0703516	0.230978	0.0487752	0.0614368	0.122664	0.171997	0.137257	0.0258978	0.126359	0.125862	0.0825402	0.139676	0.0496829
chr17	28172618	28163543	+	NLK	circNLK_2	circ10362	-0.135852	0.762361		down_Mturquoise	1	1	1	1	1	1					0	0	0.0555224	0.0389581	0.12322	0.0345869	0.0873614	0	0.144305	0.0201633	0.117291	0.0921672	0.0789368	0.0481459	0.0978749	0.0245932	0.140703	0.0989905	0.0975504	0.0307184	0.163552	0.372659	0.0915045	0.0776933	0.0561596	0.0629312	0.137567	0.0698379	0.0745243
chr17	33088863	33112067	-	ASIC2	circASIC2	circ10504	0.607029	0.0475314	up		1	1	1	1	1	1	1	1	1	1	1	1	0.0277612	0.012986	0.12322	0.0230579	0.062401	0	0.020615	0.0100817	0.0180448	0.0204816	0.0131561	0.0120365	0.0587249	0.0245932	0.0527637	0.0164984	0.0487752	0	0.0408879	0.0859983	0	0.0258978	0.0140399	0.0209771	0	0.0139676	0.0124207
chr17	36953907	36952886	+	AATF	circAATF	circ10529	-0.0554252	0.743269			1	1	1	1	1	1					0	0	0.0138806	0.012986	0	0.011529	0.0124802	0	0	0.0201633	0	0.0102408	0.0131561	0.0481459	0.0587249	0.0368898	0	0.0329968	0.0243876	0	0	0	0.0457522	0.0258978	0.0280798	0.0419542	0	0	0.0496829
chr17	42501304	42498924	+	ATP6V0A1	circATP6V0A1	circ10646	-0.155172	0.500094			1	1	1	1	1	1					0	0	0.0138806	0.0389581	0	0	0.0249604	0.0334009	0.020615	0.030245	0.0360896	0.0307224	0.0263123	0.0361094	0	0.0245932	0.0175879	0	0.0731628	0.0204789	0	0.200663	0	0.0517955	0.0280798	0	0	0.0139676	0.0248414
chr17	44084555	44087696	-	HDAC5	circHDAC5	circ10674	0.194955	0.647957		down_Mturquoise	1	1	1	1	1	1					0	0	0.0138806	0.0259721	0	0.0230579	0.0124802	0.0167004	0	0.0100817	0.0270672	0.0102408	0.0131561	0.0361094	0	0.0122966	0.0351758	0.0494953	0	0.0307184	0	0.0573322	0.0457522	0	0.0280798	0.0209771	0.0275134	0	0
chr17	46066537	46094701	-	KANSL1	circKANSL1	circ10701	0.346341	0.220216		down_Mturquoise	1	0	1	0	1	0	1	1	1	1	1	1	0.0138806	0	0	0.011529	0.0249604	0	0.04123	0.0100817	0.0360896	0	0.0394684	0.0120365	0	0	0.123115	0	0.0731628	0.0204789	0.0408879	0	0	0	0.0561596	0.0419542	0.0550268	0	0.0248414
chr17	48113401	48112031	+	SNX11	circSNX11	circ10729	-0.103486	0.733845			1	1	1	1	1	1					0	0	0.0138806	0.0779162	0	0	0.0124802	0	0.020615	0.030245	0.0451121	0.0102408	0	0.0240729	0.03915	0	0.0351758	0.0164984	0.0243876	0.0102395	0.0613319	0.0286661	0.0457522	0	0.0280798	0.0314656	0.0275134	0	0.0372622
chr17	51268904	51263274	+	UTP18	circUTP18	circ10779	-0.273482	0.201922			1	1	1	1	1	1					0	0	0.0138806	0.0779162	0.0246439	0.011529	0.0374406	0.0167004	0.020615	0	0.0180448	0.0409632	0	0.0361094	0.019575	0.0122966	0	0.0659937	0.0243876	0.0307184	0.0408879	0.114664	0.0686283	0.0776933	0.0421197	0.0419542	0.110054	0.0558703	0.0496829
chr17	56856625	56848696	+	DGKE	circDGKE	circ10833	0.328867	0.376644			1	1	1	1	1	1					0	0	0	0	0.0985758	0	0	0	0	0.0100817	0.0180448	0.0102408	0.0263123	0	0.0587249	0	0.0351758	0.0164984	0	0	0.020444	0	0.0228761	0.0258978	0.0561596	0	0.0275134	0	0
chr17	59353526	59353215	+	YPEL2	circYPEL2	circ10921	-0.584761	0.0541856			1	1	1	1	1	1			1		1	0	0	0	0	0.011529	0.0124802	0	0	0	0	0	0	0	0	0	0	0.0329968	0	0	0	0.0286661	0.0228761	0	0.0140399	0.0104885	0	0.0419027	0.0124207
chr17	59738947	59731421	+	VMP1	circVMP1_1	circ10931	-0.0040908	0.622243			1	1	1	1	1	1			1	1	1	1	0.0416418	0.0519441	0	0.0922316	0.0873614	0.116903	0.0824599	0.0806532	0.0631569	0.051204	0.0657806	0.132401	0.176175	0.0245932	0.0175879	0.197981	0.146326	0.0614368	0.163552	0.0859983	0.114381	0.0517955	0.0140399	0.178305	0.0275134	0.167611	0.0621036
chr17	59773885	59731421	+	VMP1	circVMP1_2	circ10934	0.013106	0.843747			1	1	1	1	1	1			1	1	1	1	0.166567	0.12986	0.12322	0.138347	0.162243	0.0334009	0.16492	0.151225	0.0812017	0.112649	0.210498	0.216657	0.11745	0.0491865	0.0879395	0.0824921	0.0975504	0.153592	0	0.200663	0.251637	0.129489	0.140399	0.157328	0.16508	0.139676	0.149049
chr17	63200957	63151270	+	TANC2	circTANC2_1	circ11040	0.00522964	0.831428		up_Mdarkred	1	1	0	0	1	1	1	1			1	1	0.0138806	0.012986	0.0985758	0	0.0124802	0.0334009	0.061845	0.0201633	0.0180448	0.0409632	0.0526245	0.0481459	0.019575	0.0122966	0.105527	0.0494953	0.0243876	0.0204789	0.0613319	0.0573322	0	0	0.0421197	0.0419542	0.0550268	0.0558703	0.0124207
chr17	63238077	63151270	+	TANC2	circTANC2_2	circ11043	0.0908276	0.983663			1	1	0	0	1	1	1	1			1	1	0.0555224	0	0.0985758	0	0.0374406	0	0	0	0.0180448	0.0102408	0	0.0240729	0.019575	0.0245932	0	0.0164984	0	0.0307184	0.020444	0.0286661	0.0686283	0	0	0	0	0.0419027	0
chr17	66689047	66687111	+	PRKCA	circPRKCA	circ11111	-0.0754088	0.743512			1	1	1	1	1	1			1		1	0	0	0	0	0	0.0374406	0	0.04123	0.0705716	0.0631569	0.0204816	0.0526245	0.0361094	0	0	0.0527637	0.0659937	0.0487752	0	0.020444	0.0573322	0.0228761	0	0.0280798	0.0104885	0	0.0419027	0
chr17	67553617	67532802	+	PITPNC1	circPITPNC1	circ11125	0.475675	0.237083			1	0	0	0	1	0					0	0	0	0	0	0	0	0.0334009	0.020615	0.0504083	0.00902241	0.0409632	0.0394684	0.0240729	0.019575	0	0.0703516	0	0	0.0204789	0	0.114664	0.0457522	0.0258978	0	0.0209771	0	0	0.0124207
chr17	67975958	67945409	+	BPTF	circBPTF	circ11152	0.156213	0.313716			1	1	1	1	1	1					0	0	0.0138806	0.0779162	0	0.0230579	0.0249604	0.0501013	0.04123	0.0604899	0.0180448	0.0307224	0.0394684	0.0240729	0.019575	0.0368898	0.0175879	0.0164984	0.0243876	0.0204789	0.0408879	0	0.0228761	0.0517955	0.0140399	0.0629312	0	0	0.0124207
chr17	82568201	82563354	+	FOXK2	circFOXK2	circ11314	0.0184706	0.98836			1	1	1	1	1	1			1		1	0	0.0416418	0.012986	0.0246439	0	0.0124802	0	0	0.030245	0.0180448	0.0307224	0.0526245	0.0361094	0.019575	0	0.0175879	0.0329968	0.0731628	0.0204789	0.0817759	0.0573322	0.0228761	0.0258978	0.0280798	0	0.0825402	0.0139676	0.0248414
chr17	82781721	82763965	+	TBCD	circTBCD	circ11323	0.012749	0.714063			1	1	1	1	1	1	1	1	1		1	1	0	0.012986	0.0246439	0	0.0374406	0	0.04123	0.030245	0.00902241	0.0102408	0.0394684	0.0481459	0.03915	0.0245932	0.0175879	0	0	0	0.0817759	0.0573322	0	0	0.0140399	0.0524427	0	0.0279352	0.0124207
chr18	8720496	8718424	+	MTCL1	circMTCL1	circ12170	-0.333807	0.102017			1	1	1	1	1	1			1	1	1	1	0.0971643	0.155832	0.0739318	0.103761	0.0124802	0.0334009	0	0.0403266	0.0360896	0.0819264	0.0657806	0.144438	0.0587249	0.0614831	0.0175879	0.0659937	0.170713	0.0307184	0.020444	0.0286661	0.0228761	0.155387	0.224639	0.157328	0.110054	0.0419027	0.0745243
chr18	9221999	9182382	+	ANKRD12	circANKRD12_1	circ12192	-0.185232	0.333474		down_Mturquoise	1	1	1	1	1	1			1	1	1	1	0.0416418	0	0.0492879	0.103761	0.112322	0.0501013	0.12369	0.0705716	0.135336	0	0.105249	0.0481459	0.019575	0.0491865	0.0703516	0	0.0487752	0.153592	0.143108	0.171997	0.160133	0.103591	0.126359	0	0	0.0279352	0.0248414
chr18	9221999	9204476	+	ANKRD12	circANKRD12_2	circ12194	-0.40196	0.284137		down_Mturquoise	1	1	1	1	1	1			1	1	1	1	0	0.0259721	0	0.0461158	0.0249604	0	0.020615	0.0201633	0.0721793	0.0614448	0.0657806	0.0481459	0.019575	0.0245932	0.123115	0.0329968	0.0487752	0.0102395	0.286215	0.0573322	0.183009	0	0.0280798	0.0419542	0.0275134	0	0
chr18	9583117	9595102	-	PPP4R1	circPPP4R1_1	circ12207	0.795909	0.00737328	up		1	1	1	1	1	1					0	0	0.0138806	0.0779162	0	0.011529	0.0249604	0	0	0.0705716	0.0902241	0	0.0920929	0.144438	0	0.0122966	0.0703516	0.0164984	0	0	0.122664	0.229329	0	0	0	0.0524427	0.0275134	0	0.0621036
chr18	9583117	9595153	-	PPP4R1	circPPP4R1_2	circ12208	0.0678714	0.953329			1	1	1	1	1	1					0	0	0	0	0.0492879	0	0	0.0167004	0	0	0.0180448	0.0102408	0.0131561	0.0361094	0.0587249	0	0	0	0.0487752	0.0307184	0	0.0859983	0.0686283	0	0.0280798	0.0104885	0	0.0419027	0
chr18	13019206	12999421	+	CEP192	circCEP192	circ11405	0.269684	0.33965			1	1	1	1	1	1					0	0	0	0	0	0.011529	0.0249604	0.0167004	0.061845	0.0201633	0.00902241	0.0102408	0.0394684	0.0120365	0.03915	0	0.0175879	0.0329968	0	0.0102395	0.020444	0.0859983	0	0.0517955	0.0280798	0.0104885	0	0.0558703	0.0248414
chr18	20991176	21020239	-	ROCK1	circROCK1	circ11454	-0.446002	0.15365			1	1	1	1	1	1					0	0	0.0277612	0	0	0	0.0499208	0.0167004	0	0.0403266	0.0541345	0.0204816	0.0657806	0.0601824	0.019575	0	0	0.0164984	0.0243876	0.0307184	0.0408879	0.0286661	0.0228761	0.0776933	0.0140399	0.0734198	0	0.0279352	0.0124207
chr18	21779685	21765772	+	MIB1	circMIB1_1	circ11489	0.0425217	0.693285			1	1	1	1	1	1			1	1	1	1	0.0832837	0.12986	0.0985758	0.138347	0.162243	0.0501013	0.16492	0.12098	0.198493	0.102408	0.105249	0.337021	0.176175	0.11067	0.0527637	0.164984	0.146326	0.0716763	0.163552	0.286661	0.0686283	0.103591	0.140399	0.167817	0.137567	0.111741	0.0993658
chr18	21819646	21765772	+	MIB1	circMIB1_2	circ11497	-0.434303	0.164074			1	1	1	1	1	1	1	1	1	1	1	1	0	0	0.0246439	0	0.0124802	0.0334009	0	0.0604899	0.0721793	0.051204	0.0263123	0.0481459	0.019575	0	0.0175879	0	0	0	0.0613319	0	0	0.0517955	0.0701996	0.0524427	0	0	0.0496829
chr18	24083081	24064140	+	TTC39C	circTTC39C	circ11536	-0.00711597	0.733919		down_Mturquoise	1	1	1	1	1	1			1	1	1	1	0	0.0259721	0.0739318	0	0.0124802	0.0167004	0.0824599	0.030245	0.0451121	0	0.0789368	0.0361094	0.03915	0.0122966	0.0351758	0	0	0.0307184	0.183996	0.0286661	0.137257	0.0258978	0.0280798	0.0419542	0.0550268	0.0838055	0.0248414
chr18	24143413	24143091	+	CABYR	circCABYR	circ11543	0.362896	0.220736		down_Mturquoise	1	1	1	1	1	1			1		1	0	0.0277612	0	0	0	0.0124802	0	0.061845	0.0201633	0.0270672	0	0.0394684	0.0361094	0.0587249	0	0.0175879	0	0	0	0	0.0573322	0	0	0.0140399	0.0209771	0	0	0
chr18	24196125	24239382	-	OSBPL1A	circOSBPL1A_1	circ11553	0.0427754	0.979777			1	1	1	1	1	1			1		1	0	0	0.0389581	0.0492879	0	0	0.167004	0.020615	0.0403266	0	0.0204816	0.0263123	0.0240729	0	0.0368898	0.0175879	0.0494953	0.0243876	0.0204789	0.0613319	0	0	0.0258978	0.0140399	0	0	0	0.0248414
chr18	24225042	24239382	-	OSBPL1A	circOSBPL1A_2	circ11555	0.440082	0.20747			1	1	1	1	1	1			1		1	0	0.0138806	0	0	0.011529	0	0.0668018	0	0	0.00902241	0	0	0	0	0	0	0	0	0.0102395	0	0.0286661	0.0457522	0.0517955	0	0.0314656	0.0275134	0.0419027	0.0372622
chr18	32124845	32111754	+	RNF138	circRNF138	circ11624	-0.0645174	0.774683		down_Mturquoise	1	1	1	1	1	1	1	1	1	1	1	1	0.0138806	0	0	0.0576448	0.0249604	0	0.061845	0.0504083	0.0451121	0	0.0394684	0.0722188	0.137025	0	0.0175879	0	0.0487752	0	0.10222	0.229329	0	0.0258978	0	0.0839083	0	0	0
chr18	34794250	34755976	+	DTNA	circDTNA	circ11656	-0.268764	0.229242		down_Mturquoise	1	1	1	1	1	1	1	1	1	1	1	1	0.0555224	0	0.0492879	0.011529	0.0124802	0	0	0	0.0180448	0.051204	0	0.0481459	0	0	0.0351758	0	0.0731628	0	0.10222	0	0	0	0.0140399	0.0209771	0	0	0.0124207
chr18	36026900	36033837	-	RPRD1A	circRPRD1A	circ11676	-0.0450326	0.991448			1	1	1	1	1	1	1	1	1	1	1	1	0	0.0389581	0	0	0	0	0.0824599	0	0.00902241	0.0102408	0.0263123	0	0.03915	0	0.0703516	0.0164984	0.0243876	0.0307184	0.163552	0.143331	0.0915045	0.0517955	0.0280798	0.0209771	0	0	0.0124207
chr18	42049605	42027443	+	PIK3C3	circPIK3C3	circ11762	-0.0619952	0.749183			1	1	1	1	1	1					0	0	0.0138806	0	0.0739318	0.0345869	0.0499208	0	0.04123	0.0504083	0.0360896	0.0204816	0.0131561	0.0601824	0.03915	0	0.0351758	0.0329968	0	0.0409579	0.122664	0.0573322	0.0457522	0	0.0421197	0.0209771	0.0550268	0	0
chr18	46946923	46946057	+	KATNAL2	circKATNAL2	circ11812	-0.19162	0.356186			1	1	1	1	1	1					0	0	0.0555224	0.0909022	0.0492879	0.0576448	0.0124802	0.0167004	0.061845	0.100817	0.0451121	0.0307224	0.0657806	0.144438	0.0978749	0.0122966	0.0527637	0.0329968	0.0731628	0.0716763	0.265772	0.114664	0.183009	0.0517955	0.0421197	0.0524427	0.16508	0.0279352	0.0124207
chr18	47865059	47896809	-	SMAD2	circSMAD2	circ11818	0.0419948	0.973189			1	1	1	1	1	1			1	1	1	1	0.0277612	0.012986	0.0492879	0.011529	0	0.0167004	0	0	0.0270672	0.0204816	0.0131561	0.0120365	0.03915	0	0	0	0.0243876	0.0307184	0.0408879	0.0859983	0	0	0	0.0314656	0.0275134	0.0279352	0.0248414
chr18	49331864	49379758	-	DYM	circDYM	circ11850	-0.219511	0.794364			1	1	1	1	1	1			1		1	0	0.0138806	0	0	0.011529	0.0124802	0	0.020615	0.030245	0.0270672	0.0307224	0	0.0240729	0	0.0122966	0.0527637	0	0	0.0102395	0.183996	0	0	0.0258978	0.0421197	0	0	0.0279352	0
chr18	54287411	54277703	+	POLI	circPOLI	circ11906	0.162784	0.808415		down_Mturquoise	1	1	1	1	1	1					0	0	0	0	0	0	0	0.0334009	0.020615	0.0201633	0.00902241	0.0102408	0	0	0.03915	0	0	0.0164984	0	0.0102395	0.0613319	0.0859983	0.0457522	0.0258978	0	0	0	0.0139676	0
chr18	55350359	55351000	-	TCF4	circTCF4_1	circ11918	0.258986	0.362985			1	1	1	1	1	1					0	0	0.0138806	0.0389581	0	0.011529	0.0748812	0	0.04123	0.0201633	0	0.0102408	0.0394684	0	0	0.0122966	0.0175879	0.0494953	0.0243876	0.0204789	0	0	0	0	0.0280798	0	0	0	0
chr18	55350359	55351003	-	TCF4	circTCF4_2	circ11919	0.258986	0.362985			1	1	1	1	1	1			1	1	1	1	0.0138806	0.0389581	0	0.011529	0.0748812	0	0.04123	0.0201633	0	0.0102408	0.0394684	0	0	0.0122966	0.0175879	0.0494953	0.0243876	0.0204789	0	0	0	0	0.0280798	0	0	0	0
chr18	56781656	56758865	+	WDR7	circWDR7_1	circ11938	-0.188756	0.344457			1	1	1	1	1	1	1	1	1	1	1	1	0.0138806	0.0259721	0.0739318	0.011529	0.0374406	0	0	0.0403266	0.0180448	0.0307224	0.0526245	0.120365	0.0587249	0	0	0.0824921	0.0975504	0.0307184	0	0.200663	0.137257	0.0258978	0.0421197	0.0524427	0.0825402	0.0419027	0.0124207
chr18	56880165	56776782	+	WDR7	circWDR7_2	circ11947	-0.337408	0.245879			0	0	1	1	1	1	1	1	1	1	1	1	0	0	0	0.0345869	0.0124802	0	0	0.0403266	0	0	0.0263123	0.0120365	0	0	0	0.0659937	0	0.0102395	0.020444	0.0286661	0.0457522	0	0	0.0104885	0	0.0419027	0
chr18	58252054	58165788	+	NEDD4L	circNEDD4L	circ11965	0.3525	0.31925			1	1	1	1	1	1	1	1	1	1	1	1	0.0555224	0.0649301	0	0.0230579	0	0.0835022	0.020615	0.0403266	0.0180448	0.0102408	0	0.0842553	0.019575	0.0368898	0	0.0494953	0.0975504	0	0.020444	0.0286661	0.0228761	0.0517955	0.0280798	0.0314656	0.110054	0.0419027	0.0372622
chr18	61507560	61490402	+	CDH20	circCDH20	circ12001	0.508493	0.166209			1	1	1	1	1	1			1		1	0	0.0138806	0.012986	0.0492879	0	0.0124802	0	0	0	0	0	0.0263123	0.0240729	0.019575	0	0.0175879	0	0	0.0204789	0	0.0286661	0.0228761	0.0517955	0.0561596	0.0419542	0.0275134	0	0.0248414
chr18	62556297	62544802	+	ZCCHC2	circZCCHC2	circ12036	0.241986	0.249972			1	1	1	1	1	1					0	0	0.0277612	0.012986	0.0492879	0.011529	0.0249604	0.0167004	0.020615	0.030245	0.0180448	0.0409632	0.0789368	0.120365	0.0978749	0.0245932	0.0351758	0.148486	0	0.0102395	0.020444	0.229329	0.0228761	0	0.0140399	0	0.137567	0.0698379	0
chr18	76851939	76849526	+	ZNF236	circZNF236_1	circ12095	-0.630008	0.0350959	down		1	1	1	1	1	1			1		1	0	0.0138806	0	0.0246439	0	0.0374406	0.0167004	0.04123	0.0504083	0.0631569	0.0819264	0.0789368	0.0120365	0	0.0614831	0.0175879	0	0.0243876	0.0204789	0.0613319	0.0573322	0.0686283	0.0517955	0	0	0.0275134	0.0279352	0.0124207
chr18	76871825	76849526	+	ZNF236	circZNF236_2	circ12096	0.336266	0.34307		down_Mturquoise	1	1	1	1	1	1			1	1	1	1	0	0.0389581	0.0246439	0.0230579	0.0124802	0.0167004	0.020615	0	0.00902241	0.0102408	0	0.0361094	0.019575	0	0.0351758	0.0164984	0.0243876	0.0204789	0	0.0859983	0.0457522	0	0	0	0	0.0139676	0.0124207
chr18	76881512	76849526	+	ZNF236	circZNF236_3	circ12099	0.112489	0.604871			1	1	1	1	1	1			1		1	0	0.0416418	0	0.0246439	0	0.0249604	0.0167004	0.020615	0.0201633	0.0270672	0.0307224	0.0131561	0.0361094	0.019575	0.0245932	0.0527637	0.0659937	0	0.0102395	0.0817759	0	0.0457522	0.0258978	0.0561596	0.0419542	0.0275134	0	0.0124207
chr18	79154555	79096476	+	ATP9B	circATP9B_1	circ12111	0.0351974	0.741578			1	1	1	1	1	1			1	1	1	1	0	0.0259721	0	0.0230579	0	0	0	0.0403266	0	0	0.0263123	0.0361094	0.03915	0.0245932	0	0.0659937	0.0487752	0	0	0.0573322	0.0228761	0.0258978	0.0140399	0.0629312	0.137567	0	0.0124207
chr18	79214038	79193183	+	ATP9B	circATP9B_2	circ12132	0.147654	0.592061			1	1	1	1	1	1			1	1	1	1	0.0277612	0	0	0	0	0.0167004	0.020615	0.0403266	0.0180448	0	0.0526245	0.0601824	0	0	0	0.0329968	0.0487752	0	0.020444	0	0.0457522	0	0	0.0314656	0	0.0279352	0
chr18	79277196	79193183	+	ATP9B	circATP9B_3	circ12146	-0.09869	0.748231			1	1	1	1	1	1			1	1	1	1	0.0416418	0.0519441	0	0.0230579	0.0374406	0.0167004	0.04123	0.030245	0.0270672	0	0.0394684	0.0361094	0.019575	0.0122966	0.0175879	0	0.0243876	0.0511973	0.0408879	0.0573322	0.0686283	0.0517955	0	0.0209771	0	0	0.0124207
chr18	79307234	79193183	+	ATP9B	circATP9B_4	circ12152	-0.369816	0.148108			1	0	1	1	1	1			1		1	0	0	0	0.0246439	0	0.0249604	0.0167004	0.061845	0.030245	0.0270672	0.0102408	0.0394684	0.0120365	0.019575	0.0122966	0.0351758	0	0	0.0102395	0.0408879	0	0	0	0.0140399	0.0209771	0	0.0419027	0.0124207
chr19	5604583	5604936	-	SAFB2	circSAFB2	circ12620	0.132364	0.255383			1	1	1	1	1	1					0	0	0.0694031	0.0519441	0.0739318	0.0345869	0.0499208	0.0167004	0.12369	0.0806532	0.0451121	0.051204	0.157874	0.0962918	0.03915	0.0122966	0.0351758	0.0164984	0.0487752	0.0819157	0.0613319	0.0859983	0.0457522	0	0.154439	0.0629312	0.0550268	0.0558703	0.0124207
chr19	8463686	8455405	+	HNRNPM	circHNRNPM	circ12699	0.421677	0.0557739			1	1	1	1	1	1					0	0	0	0.0259721	0	0.0461158	0	0.0167004	0.103075	0.0403266	0.0180448	0.0204816	0.0263123	0.0481459	0.03915	0.0368898	0.123115	0	0	0	0.10222	0.0859983	0.137257	0.0258978	0.0280798	0.0104885	0	0	0
chr19	12928342	12928847	-	FARSA	circFARSA	circ12265	-0.0767634	0.875392		down_Mturquoise	1	1	1	1	1	1			1	1	1	1	0.0555224	0.0259721	0.0246439	0.0230579	0.0249604	0.0167004	0.04123	0.0403266	0	0.0307224	0.0131561	0.0962918	0.03915	0.0368898	0.0703516	0.0494953	0.121938	0.0102395	0.020444	0.0859983	0.0457522	0.0776933	0	0.0209771	0.0275134	0.097773	0.0248414
chr19	13332869	13334493	-	CACNA1A	circCACNA1A	circ12284	-0.478237	0.100061		down_Mviolet	1	1	1	1	1	1			1	1	1	1	0.0416418	0	0	0	0.0124802	0	0	0.0100817	0	0	0.0526245	0	0.019575	0	0.0703516	0.0494953	0.0243876	0	0.020444	0	0	0.0517955	0.0561596	0	0	0.0698379	0.0496829
chr19	14458375	14458031	+	PKN1	circPKN1	circ12297	0.686063	0.0371409	up	down_Mturquoise	1	1	1	1	1	1			1		1	0	0.0138806	0.0259721	0.0246439	0	0	0	0.0824599	0.0201633	0.00902241	0.0102408	0.0263123	0.0120365	0	0.0368898	0	0.0164984	0	0.0102395	0.020444	0.0573322	0.0228761	0	0.0280798	0.0104885	0.0275134	0.0139676	0
chr19	17276909	17276495	+	AC010463.1,BABAM1	circBABAM1	circ12319	-0.113514	0.662711		down_Mturquoise	1	1	1	1	1	1			1		1	0	0.0277612	0.012986	0	0.011529	0.0249604	0	0	0.0100817	0.00902241	0.0307224	0.0131561	0.0240729	0	0.0122966	0.0351758	0.0164984	0	0.0102395	0	0.0286661	0	0.0517955	0.0280798	0.0104885	0.0275134	0.0279352	0.0124207
chr19	18539371	18539720	-	FKBP8	circFKBP8	circ12339	-0.00936537	0.882913		down_Mturquoise	1	1	1	1	1	1					0	0	0.0694031	0.103888	0.246439	0.138347	0.112322	0.150304	0.0824599	0.0907349	0.0541345	0.143371	0.0657806	0.108328	0.0782999	0.0368898	0.123115	0.197981	0.0487752	0.112634	0.286215	0.372659	0.137257	0.129489	0.0561596	0.0943969	0.137567	0.139676	0.111787
chr19	19248882	19245313	+	NCAN	circNCAN	circ12348	0.454053	0.137771			1	1	1	1	1	1					0	0	0.0277612	0	0	0	0.0249604	0	0.020615	0	0	0.0307224	0.0131561	0	0.0587249	0	0	0.0329968	0.0243876	0.0204789	0.0408879	0	0.0457522	0	0.0140399	0.0314656	0	0	0.0124207
chr19	40583717	40583398	+	SHKBP1	circSHKBP1	circ12508	0.298602	0.333683			1	1	1	1	1	1					0	0	0.0416418	0.0389581	0	0.0230579	0.0249604	0.0501013	0.103075	0.0403266	0.0541345	0.0716856	0.0657806	0.0361094	0	0.0122966	0.0175879	0	0	0.0204789	0	0.0859983	0.0686283	0.0517955	0	0.0209771	0	0.0139676	0
chr19	40737769	40736986	+	ITPKC	circITPKC	circ12514	0.224459	0.415327			1	1	1	1	1	1			1		1	0	0.0138806	0	0.0492879	0.0461158	0	0.0334009	0.020615	0.0100817	0	0.0102408	0.0131561	0.0240729	0.03915	0.0245932	0.0879395	0.0329968	0	0	0.020444	0.0573322	0	0.0258978	0.0140399	0.0314656	0	0.0139676	0.0248414
chr19	47264946	47264603	+	CCDC9	circCCDC9	circ12572	-0.0446765	0.854379			1	1	1	1	1	1			1		1	0	0	0.012986	0.0246439	0.011529	0	0.0334009	0	0.0100817	0.0180448	0.0102408	0.0263123	0.0481459	0.019575	0.0245932	0.0527637	0.0164984	0.0487752	0	0.020444	0.0573322	0.0228761	0.0258978	0.0140399	0.0419542	0	0	0.0248414
chr19	47362693	47362476	+	DHX34	circDHX34	circ12574	-0.131981	0.811336			1	1	1	1	1	1					0	0	0.0277612	0.0259721	0.0246439	0.0230579	0	0	0	0.0100817	0	0	0.0394684	0.0481459	0	0.0368898	0	0.0164984	0.0487752	0.0102395	0	0	0	0	0.0421197	0.0209771	0	0	0.0621036
chr19	47416652	47417350	-	MEIS3	circMEIS3	circ12575	-0.113696	0.379474			1	1	1	1	1	1					0	0	0.111045	0.0909022	0.172508	0.0691737	0.124802	0.133604	0.04123	0.110898	0.0902241	0.153612	0.144717	0	0.03915	0.0737797	0.105527	0.280473	0.0731628	0.0511973	0.408879	0.429992	0.183009	0.155387	0.0842395	0.0629312	0.110054	0.153643	0
chr19	48633444	48633655	-	DBP	circDBP	circ12585	0.290187	0.3401			1	1	1	1	1	1					0	0	0.0694031	0	0.0246439	0	0.0748812	0	0	0.0201633	0.0270672	0	0	0	0.019575	0.0122966	0.0351758	0.0164984	0.0243876	0.0204789	0	0	0	0	0.0421197	0.0104885	0	0.0139676	0.0496829
chr19	52076044	52089002	-	ZNF841	circZNF841	circ12610	0.116911	0.60257		down_Mturquoise	1	1	1	1	1	1					0	0	0.0138806	0	0	0.0461158	0	0	0.061845	0.0201633	0.0360896	0.0204816	0	0.0481459	0	0	0.0351758	0	0	0.0204789	0	0	0	0	0	0.0629312	0	0.0698379	0.0496829
chr2	1922292	1923263	-	MYT1L	circMYT1L	circ14472	0.0438686	0.855289		down_Mturquoise	1	1	1	1	1	1			1	1	1	1	0.0277612	0.012986	0.0492879	0	0	0.0167004	0	0.0201633	0	0	0	0.0601824	0	0	0	0.0329968	0.0487752	0	0	0.0573322	0	0.0258978	0.0982794	0	0	0	0.0124207
chr2	8908621	8958642	-	MBOAT2	circMBOAT2_1	circ16441	-0.0945175	0.834616		down_Mturquoise	1	1	1	1	1	1			1	1	1	1	0	0.012986	0.0739318	0	0	0.0334009	0	0.141143	0	0.266261	0.302591	0.0842553	0	0	0.298994	0.0824921	0.0243876	0	0.429323	0	0.320266	0.0258978	0	0.0314656	0	0.0419027	0
chr2	8943187	8958642	-	MBOAT2	circMBOAT2_2	circ16443	0.267066	0.231042			1	1	1	1	1	1			1	1	1	1	0.0416418	0	0	0.011529	0.0499208	0	0.16492	0.0403266	0.117291	0.0819264	0.0526245	0.0361094	0.11745	0.0491865	0.0703516	0.0329968	0.0243876	0.112634	0.122664	0.229329	0.0915045	0	0.0421197	0	0.0550268	0.0558703	0
chr2	10644320	10668723	-	NOL10	circNOL10	circ13283	0.302369	0.256879		down_Mturquoise	1	1	1	1	1	1					0	0	0	0	0.0246439	0.011529	0.0249604	0.0167004	0	0	0.0360896	0.0409632	0	0.0361094	0	0	0.0175879	0.0494953	0	0.0307184	0	0.143331	0.0457522	0.0517955	0.0701996	0.0209771	0	0.0279352	0
chr2	15488894	15511350	-	NBAS	circNBAS_1	circ14049	-0.0105769	0.824174		down_Mturquoise	1	1	1	1	1	1			1	1	1	1	0	0.012986	0.0246439	0.0230579	0	0	0.020615	0	0	0.0102408	0.0263123	0.0240729	0.019575	0	0.0351758	0	0	0.0102395	0.0613319	0.0286661	0.0457522	0	0	0.0104885	0	0	0.0248414
chr2	15553426	15558634	-	NBAS	circNBAS_2	circ14057	-0.513648	0.0582738			1	1	1	1	1	1					0	0	0	0	0.0246439	0	0.0124802	0.0167004	0	0	0	0.0204816	0.0263123	0	0.0587249	0	0.0175879	0	0.0243876	0.0204789	0.020444	0	0.0228761	0	0	0.0314656	0	0.0279352	0
chr2	20307978	20327378	-	PUM2	circPUM2	circ14670	0.121087	0.524839			1	1	1	1	1	1			1		1	0	0	0	0	0	0.0124802	0	0.020615	0	0.0270672	0.0307224	0.0526245	0.0240729	0.019575	0	0.0175879	0	0	0.0204789	0	0.0573322	0.0457522	0	0.0140399	0.0104885	0.0825402	0.0279352	0
chr2	23984831	23958301	+	UBXN2A	circUBXN2A	circ15228	-0.217248	0.617022		down_Mturquoise	1	1	1	1	1	1					0	0	0.0138806	0	0	0	0	0	0	0	0.00902241	0.0204816	0.0131561	0.0120365	0.03915	0	0.0175879	0.0329968	0	0	0.0817759	0.0573322	0	0	0	0.0104885	0.0275134	0.0139676	0
chr2	24147086	24135119	+	AC008073.3,FAM228B	circFAM228B	circ15317	-0.378956	0.116204			1	1	1	1	1	1					0	0	0.0138806	0.0389581	0.0492879	0.0230579	0.0374406	0.0167004	0	0.030245	0.0180448	0	0.0263123	0.0240729	0.0782999	0	0.0175879	0.0659937	0.0731628	0.0102395	0.020444	0.229329	0.0915045	0.0776933	0.0280798	0.0209771	0	0	0
chr2	29145367	29133655	+	CLIP4	circCLIP4_1	circ15530	0.270596	0.406573			1	1	1	1	1	1					0	0	0.0138806	0.0519441	0	0.0461158	0.0124802	0.0167004	0	0	0.0180448	0	0.0131561	0.0240729	0.019575	0	0	0	0	0.0204789	0.020444	0.0286661	0	0.0776933	0.0140399	0.0104885	0	0	0.0248414
chr2	29157347	29133655	+	CLIP4	circCLIP4_2	circ15532	-0.24948	0.370731			1	1	1	1	1	1					0	0	0	0.0259721	0.0246439	0.011529	0	0.0167004	0.020615	0.0100817	0.00902241	0.0102408	0.0131561	0.0240729	0.019575	0	0	0.0164984	0	0.0102395	0.020444	0.0286661	0	0	0.0140399	0	0	0	0
chr2	30568176	30459552	+	LCLAT1	circLCLAT1	circ15548	-0.53193	0.117572		down_Mturquoise	0	0	1	1	1	1					0	0	0.0277612	0	0	0	0	0.0167004	0.020615	0.0100817	0	0	0.105249	0.0120365	0.019575	0	0.0175879	0.0329968	0	0	0.020444	0	0.0457522	0.0258978	0.0421197	0	0	0	0
chr2	32395593	32377588	+	BIRC6	circBIRC6_1	circ15592	0.162137	0.478135		down_Mturquoise	1	1	1	1	1	1					0	0	0.0555224	0.0389581	0	0	0.062401	0	0.061845	0.0806532	0.00902241	0.0716856	0.0657806	0.0120365	0.0587249	0.0491865	0.0527637	0.0329968	0.0731628	0.0511973	0	0.0859983	0.0457522	0.0517955	0.0280798	0.0104885	0.0550268	0	0.0124207
chr2	32406557	32377588	+	BIRC6	circBIRC6_2	circ15595	-0.172504	0.447098			1	1	1	1	1	1			1		1	0	0.0416418	0	0	0.011529	0.0124802	0.0167004	0.04123	0	0.0180448	0.0204816	0.0394684	0	0	0.0122966	0.0175879	0	0.0243876	0	0	0.0286661	0	0	0.0280798	0.0209771	0	0	0
chr2	32416163	32414769	+	BIRC6	circBIRC6_3	circ15598	-0.258283	0.451112			1	1	1	1	1	1					0	0	0	0.0389581	0	0	0	0.0167004	0	0.0100817	0.00902241	0	0	0.0120365	0.03915	0	0.0175879	0.0164984	0	0	0	0	0.0228761	0	0	0.0314656	0	0	0
chr2	36442735	36441258	+	CRIM1	circCRIM1	circ15651	0.176492	0.544938		down_Mturquoise	1	1	1	1	1	1	1	1	1	1	1	1	0.0138806	0.012986	0	0	0.0124802	0	0	0	0.00902241	0	0.0131561	0.0120365	0.019575	0	0.0527637	0.0329968	0	0.0102395	0.0408879	0.0573322	0.0228761	0	0	0	0	0.0279352	0.0372622
chr2	40428473	40430304	-	SLC8A1	circSLC8A1	circ15748	-0.267503	0.182749		down_Mturquoise	1	1	1	1	1	1					0	0	1.99881	1.24666	0.961114	0.795498	2.14659	0.701419	1.95842	1.89535	2.10222	2.54996	2.43388	2.40729	1.62472	0.823873	1.63567	0.428959	0.975504	1.75095	3.02571	0.315327	1.34969	0.984115	3.29938	2.12917	2.39367	1.10344	0.670719
chr2	42723035	42718988	+	MTA3	circMTA3	circ15773	0.419806	0.105245		down_Mturquoise	1	1	1	1	1	1	1	1	1	1	1	1	0.0277612	0.0389581	0.0246439	0.011529	0.0124802	0	0.04123	0.0100817	0.00902241	0.0307224	0.0131561	0.0120365	0	0.0122966	0.0175879	0.0164984	0.0487752	0.0307184	0.020444	0.0573322	0	0	0.0140399	0	0.0550268	0.0139676	0
chr2	50236789	50506617	-	NRXN1	circNRXN1_1	circ15886	0.449173	1			0	0	1	1	1	1			1	1	1	1	0.0138806	0	0	0.011529	0.0249604	0	0.0824599	0	0.0451121	0	0.0526245	0.0361094	0.0782999	0.0245932	0	0.0659937	0.0487752	0.0511973	0.020444	0	0.0915045	0.0258978	0.0701996	0.0524427	0.0275134	0.0279352	0.0124207
chr2	50465442	50506617	-	NRXN1	circNRXN1_2	circ15896	-0.116381	0.558654			1	1	1	1	1	1	1	1	1	1	1	1	0	0.012986	0.0246439	0.0230579	0	0.0167004	0	0	0.00902241	0.0102408	0.0131561	0.0120365	0.019575	0.0122966	0.0351758	0	0	0	0.0817759	0	0.0457522	0	0.0280798	0.0104885	0	0.0139676	0
chr2	50472298	50620183	-	NRXN1	circNRXN1_3	circ15905	-0.884337	0.0283774	down	down_Mturquoise	0	0	1	1	1	1			1	1	1	1	0.0555224	0.012986	0.0246439	0	0.0499208	0	0.0824599	0.0604899	0.108269	0.0819264	0.0657806	0.0240729	0	0	0.0175879	0	0	0.0102395	0.122664	0	0.0686283	0	0.0982794	0.0209771	0.0550268	0.0139676	0.0124207
chr2	54829477	54813232	+	EML6	circEML6_1	circ15950	-0.486572	0.128071			1	1	1	1	1	1			1	1	1	1	0	0	0	0	0	0.0334009	0.020615	0.0201633	0.0451121	0.0204816	0.0263123	0.0240729	0.019575	0	0	0	0	0.0204789	0	0.0573322	0.0228761	0	0.0140399	0.0104885	0.0550268	0	0
chr2	54928751	54813232	+	EML6	circEML6_2	circ15959	-0.189703	0.726634		down_Mturquoise	0	0	1	1	1	1			1		1	0	0.0277612	0.0389581	0	0.0230579	0.0249604	0.0334009	0	0.0100817	0.0812017	0.0102408	0.0394684	0.0361094	0	0	0	0	0	0	0.020444	0	0.0228761	0.0517955	0	0.0209771	0.0550268	0	0
chr2	54982515	54987698	-	RTN4	circRTN4_1	circ15965	0.222177	0.352206			1	1	1	1	1	1			1		1	0	0.0555224	0.0519441	0.0985758	0.0576448	0.0249604	0.0835022	0.103075	0.0604899	0.0721793	0.051204	0.0657806	0.0601824	0.0587249	0.0245932	0.0527637	0.115489	0.0731628	0.0409579	0.10222	0.143331	0.114381	0.0776933	0.0842395	0.0314656	0.0550268	0.0419027	0.0496829
chr2	55025086	55028220	-	RTN4	circRTN4_2	circ15966	0.228827	0.428298			1	1	1	1	1	1			1	1	1	1	0.0277612	0.0519441	0.0246439	0.0461158	0.0124802	0	0	0.0604899	0	0.0204816	0.0263123	0.0240729	0	0	0.0175879	0	0	0	0.020444	0.143331	0.0686283	0	0.140399	0.0209771	0	0	0.0248414
chr2	55332566	55335164	-	CCDC88A	circCCDC88A	circ15972	0.416583	0.0729395			1	1	1	1	1	1					0	0	0	0.012986	0	0.0230579	0	0.0668018	0.04123	0.0201633	0.00902241	0.0102408	0.0263123	0.0361094	0.0782999	0	0.0175879	0.0329968	0	0.0102395	0.020444	0.0573322	0.0228761	0	0.0421197	0	0	0.0139676	0.0124207
chr2	58089723	58048827	+	VRK2	circVRK2	circ16011	0.322848	0.233193			1	1	1	1	1	1					0	0	0	0.0259721	0.0246439	0.0691737	0.0249604	0	0.12369	0.0806532	0.0270672	0.0614448	0	0.0842553	0.0978749	0	0.0527637	0.0329968	0	0.0102395	0	0.343993	0.160133	0.0258978	0.0140399	0.0209771	0.110054	0.0279352	0.0372622
chr2	58198594	58232112	-	FANCL	circFANCL	circ16016	0.273477	0.291363			1	1	1	1	1	1			1	1	1	1	0.0138806	0.012986	0	0	0.0374406	0.0334009	0.04123	0	0.0360896	0.0307224	0	0	0.03915	0	0	0.0329968	0	0.0102395	0	0.0859983	0.0457522	0.0258978	0	0.0629312	0.0550268	0.0139676	0.0124207
chr2	61118116	61115979	+	KIAA1841	circKIAA1841	circ16040	-0.167145	0.472506		down_Mturquoise	1	1	1	1	1	1			1		1	0	0	0	0	0.0230579	0.0374406	0	0.04123	0.0100817	0.00902241	0.0102408	0.0394684	0.0481459	0.019575	0.0122966	0.0351758	0.0989905	0.0243876	0.0204789	0.143108	0.0859983	0.0228761	0	0	0.0104885	0.0825402	0	0.0372622
chr2	61522611	61526521	-	XPO1	circXPO1	circ16113	0.0518857	0.784062		down_Mturquoise	1	1	1	1	1	1					0	0	0.0138806	0	0.0246439	0	0	0	0.04123	0	0.0360896	0	0.0394684	0	0.019575	0.0368898	0.0527637	0	0.0487752	0	0.0613319	0.0573322	0	0	0.0280798	0	0.0275134	0	0
chr2	62996766	62979188	+	EHBP1	circEHBP1	circ16135	-0.5451	0.144088		down_Mturquoise	1	1	1	1	1	1			1	1	1	1	0.0416418	0	0.0246439	0	0.0124802	0	0.020615	0	0.00902241	0.0102408	0.0263123	0.0120365	0	0.0122966	0.0527637	0.0494953	0	0	0.0408879	0.0573322	0.0228761	0	0.0280798	0.0104885	0.0275134	0.0139676	0
chr2	71380565	71363153	+	ZNF638	circZNF638_1	circ16275	-0.0433627	0.987573			0	0	0	0	0	0					0	0	0.0138806	0.0259721	0	0	0.0499208	0	0	0.0201633	0	0	0.0131561	0.0120365	0.0587249	0.0122966	0	0	0.0243876	0.0204789	0.0408879	0.0573322	0	0.0517955	0.0421197	0	0	0.0419027	0
chr2	71427414	71426460	+	ZNF638	circZNF638_2	circ16286	-0.51509	0.0414053	down	down_Mturquoise	1	1	1	1	1	1			1		1	0	0	0.012986	0.0492879	0	0.062401	0	0.04123	0.030245	0	0	0.0263123	0.0361094	0.03915	0.0245932	0.0351758	0.0329968	0	0	0.0408879	0.114664	0	0	0.0140399	0	0	0	0.0248414
chr2	72718103	72733118	-	EXOC6B	circEXOC6B_1	circ16315	-0.307687	0.15426			1	1	1	1	1	1	1	1	1	1	1	1	0.44418	0.298679	0.394303	0.138347	0.574089	0.167004	0.597835	0.554491	0.29774	0.471077	0.999866	0.433313	0.371925	0.209042	0.844219	0	0.341426	0.358381	0	0	1.37257	0	0.814315	0.220259	1.04551	0.321254	0.124207
chr2	72731007	72733118	-	EXOC6B	circEXOC6B_2	circ16317	-0.26239	0.355129			1	1	1	1	1	1			1		1	0	0.138806	0.0259721	0.147864	0.011529	0.149762	0.0167004	0.061845	0.231878	0.0992465	0.13313	0.223654	0.120365	0.0587249	0.11067	0.316582	0.0659937	0.0243876	0.0716763	0.163552	0.200663	0.320266	0.0776933	0.224639	0.0524427	0.110054	0.0558703	0.0496829
chr2	73559142	73557220	+	ALMS1	circALMS1	circ16340	-0.0852823	0.792382			1	1	1	1	1	1					0	0	0.0277612	0.012986	0.0739318	0.0576448	0.0124802	0.0334009	0.04123	0.030245	0.0631569	0.0204816	0.0263123	0.0120365	0.019575	0.0368898	0.0351758	0.0329968	0	0.0204789	0.0408879	0.171997	0	0.0776933	0.0140399	0.0314656	0.0550268	0.0419027	0
chr2	85861181	85863485	-	ST3GAL5	circST3GAL5	circ16407	0.0477541	0.755735			1	1	1	1	1	1			1	1	1	1	0.0138806	0	0	0.011529	0	0	0.020615	0.0201633	0.0270672	0.0409632	0	0.0240729	0.0782999	0.0122966	0.0175879	0	0.0731628	0	0	0.0859983	0.0228761	0	0	0.0209771	0	0.0139676	0
chr2	86251957	86264041	-	REEP1	circREEP1	circ16415	-0.254937	0.421693			1	1	1	1	1	1			1	1	1	1	0	0	0	0	0	0.0167004	0.04123	0.0100817	0	0	0.0526245	0	0.019575	0.0245932	0	0.0329968	0	0	0.020444	0	0.0228761	0	0.0140399	0.0104885	0	0.0139676	0
chr2	99195756	99186177	+	AC079447.1	circRP11-111H13.1	circ16488	-0.129437	0.625239			1	1	1	1	1	1					0	0	0.0277612	0.0259721	0.0246439	0	0.0499208	0	0	0.0201633	0.00902241	0.0204816	0	0.0120365	0.019575	0	0.0527637	0	0.0243876	0.0409579	0	0	0	0	0.0280798	0	0	0.0419027	0
chr2	99462496	99464985	-	REV1	circREV1	circ16509	-0.0711204	0.88622			1	1	1	1	1	1	1	1	1	1	1	1	0	0	0	0	0.0374406	0.0167004	0.061845	0.0504083	0.0902241	0.0409632	0.0394684	0.0842553	0	0	0.0527637	0.0494953	0.0487752	0.0614368	0.0613319	0.0286661	0.0686283	0.0258978	0	0.0314656	0	0.0558703	0.0248414
chr2	106122970	106166083	-	UXS1	circUXS1_1	circ13278	-0.322875	0.307453			1	1	1	1	1	1			1		1	0	0	0	0	0	0	0	0	0	0.0180448	0.0409632	0	0.0120365	0	0	0.0527637	0.0494953	0	0	0	0.0573322	0.0457522	0	0.0140399	0.0209771	0	0.0279352	0
chr2	106158058	106166083	-	UXS1	circUXS1_2	circ13281	0.039657	0.793696			1	1	1	1	1	1					0	0	0.0416418	0.0259721	0.0985758	0	0.0124802	0	0.061845	0.030245	0.0360896	0	0.0394684	0.0481459	0.0587249	0.0245932	0.0527637	0	0	0.0409579	0.0613319	0	0	0	0.126359	0.0943969	0.0275134	0.0419027	0.0124207
chr2	106830066	106834146	-	ST6GAL2	circST6GAL2_1	circ13288	0.166409	0.644676			1	1	1	1	1	1			1	1	1	1	0.0416418	0.0519441	0.147864	0.0230579	0.0748812	0	0.0824599	0.0604899	0.0270672	0.051204	0.0920929	0.0722188	0.019575	0.0122966	0.0527637	0.0164984	0.0487752	0.0204789	0.122664	0.200663	0.0457522	0.0258978	0	0	0.110054	0.0139676	0
chr2	106830066	106844034	-	ST6GAL2	circST6GAL2_2	circ13289	0.0660186	0.949382			1	1	1	1	1	1			1	1	1	1	0.152687	0.0779162	0.295727	0.0576448	0.162243	0.0835022	0.185535	0.0907349	0.126314	0.12289	0.17103	0.216657	0.11745	0.0737797	0.158291	0.0989905	0.0731628	0.112634	0.183996	0.0859983	0.251637	0.129489	0.140399	0.136351	0.192594	0.209514	0.0993658
chr2	108773046	108771701	+	RANBP2	circRANBP2	circ13308	-0.246425	0.428352		up_Mdarkred	1	1	1	1	1	1					0	0	0	0.0259721	0	0	0	0	0.020615	0.030245	0.0180448	0.0409632	0	0.0240729	0	0	0.0175879	0.0329968	0	0.0102395	0	0	0	0	0.0421197	0	0	0.0139676	0.0372622
chr2	112300029	112299849	+	ZC3H6	circZC3H6_1	circ13342	-0.121381	0.427878			1	1	1	1	1	1			1	1	1	1	0.138806	0.103888	0.12322	0.126818	0.199683	0.100203	0.16492	0.0705716	0.144359	0.0819264	0.249966	0.156474	0.1566	0.0983729	0.211055	0.164984	0.0487752	0.112634	0.347547	0.372659	0.228761	0.0517955	0.182519	0.0839083	0.302647	0.139676	0.0745243
chr2	112325197	112299849	+	ZC3H6	circZC3H6_2	circ13345	-0.206602	0.799366		down_Mturquoise	1	1	1	1	1	1					0	0	0.0277612	0.012986	0	0	0	0	0	0.0201633	0.0180448	0	0.0263123	0	0	0.0368898	0.0351758	0	0.0731628	0	0.020444	0	0	0	0	0	0.0275134	0.0139676	0.0124207
chr2	119945240	119926598	+	PTPN4	circPTPN4	circ13446	-0.172791	0.365169			1	1	1	1	1	1					0	0	0.0694031	0	0	0.011529	0	0	0	0.0504083	0.00902241	0.0204816	0.0131561	0	0.019575	0	0.0175879	0.0494953	0.0243876	0.0102395	0.0408879	0.0859983	0	0.0258978	0.0280798	0	0.0550268	0.0139676	0.0124207
chr2	121605701	121606180	-	CLASP1	circCLASP1	circ13507	0.130924	0.617487			1	1	1	1	1	1			1	1	1	1	0	0	0	0	0.0124802	0.0167004	0	0.0100817	0	0.0102408	0.0263123	0.0601824	0.03915	0	0.0175879	0.0329968	0.0243876	0.0102395	0.0817759	0.0286661	0	0	0.0421197	0.0104885	0.0275134	0	0.0124207
chr2	124242393	124221705	+	CNTNAP5	circCNTNAP5_1	circ13511	0.370359	0.0290817		up_Mdarkred	1	1	1	1	1	1	1	1	1	1	1	1	0.0277612	0.0519441	0.0739318	0.0345869	0.0249604	0	0.061845	0.0403266	0.0812017	0.0409632	0.0394684	0.132401	0.0587249	0.0368898	0	0.0164984	0.0731628	0.0819157	0.10222	0.0573322	0.0228761	0.0517955	0.0421197	0.0629312	0	0.0698379	0.0372622
chr2	124798320	124772799	+	CNTNAP5	circCNTNAP5_2	circ13522	-0.553133	0.0267734	down		1	1	1	1	1	1			1	1	1	1	0.0277612	0.012986	0	0	0.062401	0	0	0.0100817	0.00902241	0	0.0131561	0.0240729	0	0.0122966	0	0	0	0.0409579	0.020444	0.0573322	0.0228761	0	0	0.0314656	0	0	0
chr2	135605016	135602500	+	R3HDM1	circR3HDM1_1	circ13670	-0.615925	0.0292888	down	down_Mturquoise	1	1	1	1	1	1	1	1	1	1	1	1	0	0	0	0	0.0124802	0	0	0.0100817	0	0.0204816	0.0263123	0	0.019575	0.0245932	0.0175879	0.0164984	0.0243876	0	0.0817759	0.0859983	0.0228761	0.0258978	0	0	0	0	0
chr2	135639122	135638739	+	R3HDM1	circR3HDM1_2	circ13679	0.101736	0.919942			1	1	1	1	1	1			1		1	0	0.0277612	0.012986	0	0.011529	0.0249604	0	0	0.030245	0	0	0.0526245	0.0120365	0.03915	0	0.0351758	0.0164984	0	0	0	0.0573322	0	0	0	0	0	0.0139676	0.0372622
chr2	135680324	135675332	+	R3HDM1	circR3HDM1_3	circ13696	-0.0884765	0.359544			1	1	1	1	1	1					0	0	0.0416418	0	0.0246439	0.0230579	0.0249604	0	0	0.0201633	0.0270672	0.0921672	0.0526245	0.0481459	0.11745	0.0491865	0.281406	0.0659937	0.0975504	0.0204789	0.286215	0.143331	0.183009	0.0258978	0.0701996	0.0209771	0.0275134	0.0558703	0.0248414
chr2	135710231	135709433	+	R3HDM1	circR3HDM1_4	circ13699	-0.077541	0.868332		down_Mturquoise	1	1	1	1	1	1					0	0	0	0	0.0246439	0	0.062401	0	0.04123	0	0.00902241	0.0102408	0.0131561	0.0120365	0.03915	0.0122966	0.0175879	0.0329968	0.0243876	0	0.0408879	0	0	0.0258978	0	0.0104885	0.0550268	0	0.0124207
chr2	135772547	135748267	+	UBXN4	circUBXN4	circ13706	0.0793012	0.72963			1	1	1	1	1	1			1		1	0	0.0138806	0.0259721	0	0.011529	0.0374406	0	0.0824599	0.0100817	0	0.0204816	0	0	0.03915	0.0122966	0	0.0164984	0	0	0	0.0859983	0	0.0258978	0.0561596	0.0104885	0.0550268	0.0279352	0
chr2	147899898	147896301	+	ACVR2A	circACVR2A	circ13941	0.258334	0.267704			1	1	1	1	1	1	1	1	1	1	1	1	0.111045	0.0519441	0.147864	0.0230579	0.0499208	0.233806	0.103075	0.141143	0.0180448	0.153612	0.197342	0.120365	0.215325	0.0614831	0.105527	0.0824921	0.268264	0.0819157	0.143108	0.51599	0.0457522	0.0776933	0.126359	0.0419542	0.16508	0.111741	0.0248414
chr2	159337462	159395834	-	BAZ2B	circBAZ2B	circ14091	-0.701985	0.0120875	down		1	1	1	1	1	1	1	1	1	1	1	1	0	0.0259721	0.0739318	0.0576448	0.0124802	0.0501013	0.04123	0.0403266	0.0270672	0.0204816	0	0.0361094	0.03915	0	0.0175879	0.0329968	0.0243876	0.0204789	0.020444	0.0286661	0	0	0.0701996	0.0524427	0.0825402	0.0139676	0.0372622
chr2	161901011	161872293	+	SLC4A10	circSLC4A10_1	circ14130	-0.0963427	0.947085		down_Mturquoise	1	0	1	1	1	1					0	0	0	0.0259721	0	0.011529	0.062401	0.0334009	0	0.0100817	0.0451121	0	0.0263123	0.0240729	0	0.0122966	0	0.0494953	0.0243876	0	0	0	0	0	0.0561596	0.0314656	0.0550268	0	0.0124207
chr2	161965173	161947566	+	SLC4A10	circSLC4A10_2	circ14137	-0.079402	0.809726		down_Mturquoise	1	1	1	1	1	1					0	0	0	0.012986	0.0246439	0.011529	0.0873614	0	0	0.0403266	0.0360896	0.0409632	0.0657806	0	0.019575	0	0.0351758	0	0	0.0102395	0.122664	0	0.0457522	0.0258978	0.0280798	0.0209771	0.0550268	0	0
chr2	162504443	162518158	-	KCNH7	circKCNH7	circ14154	-0.208119	0.311413			1	1	1	1	1	1	1	1	1	1	1	1	0.0277612	0.0259721	0	0	0.0124802	0.0167004	0.020615	0	0	0.0307224	0	0.0240729	0.03915	0.0122966	0.0351758	0.0329968	0	0.0102395	0.183996	0.0573322	0.0228761	0	0	0.0209771	0.0275134	0.0279352	0
chr2	168063500	168075231	-	STK39	circSTK39_1	circ14177	-0.220047	0.352103		down_Mturquoise	1	1	1	1	1	1	1	1	1	1	1	1	0.0138806	0.0259721	0	0.011529	0.0124802	0	0.020615	0.0100817	0	0.051204	0	0.0120365	0.019575	0	0.0175879	0.0329968	0	0.0204789	0.020444	0	0	0.0258978	0.0140399	0.0209771	0.0275134	0.0139676	0.0496829
chr2	168063500	168129758	-	STK39	circSTK39_2	circ14179	0.0556091	0.880378			1	1	1	1	1	1	1		1	1	1	1	0	0	0.345015	0	0	0.0668018	0	0.252041	0.189471	0	0.289435	0.300912	0	0.258229	0	0	0.243876	0	0.490655	0.573322	0.183009	0.207182	0.266758	0.188794	0	0.363157	0.161469
chr2	168138088	168182090	-	STK39	circSTK39_3	circ14192	0.818729	0.042904	up	up_Mdarkred	1	1	1	1	1	1	1	1	1	1	1	1	0.0277612	0.012986	0	0	0.0124802	0.0167004	0.020615	0.0201633	0.00902241	0.0102408	0	0.0240729	0	0	0	0.0659937	0	0	0.020444	0	0	0	0.0140399	0.0104885	0.0275134	0.0139676	0.0124207
chr2	168161787	168182090	-	STK39	circSTK39_4	circ14194	0.260211	0.362127		up_Mdarkred	1	1	1	1	1	1	1	1	1	1	1	1	0.0138806	0.012986	0	0	0	0	0	0	0	0	0.0131561	0.0240729	0.019575	0	0.0351758	0.0329968	0	0.0204789	0.020444	0.0286661	0.0457522	0	0.0280798	0.0104885	0	0.0419027	0
chr2	168717978	168691034	+	CERS6	circCERS6	circ14197	-0.23157	0.129282			1	1	1	1	1	1	1	1	1	1	1	1	0	0.0259721	0.0492879	0.0461158	0.0374406	0.0167004	0	0.0100817	0.0270672	0.051204	0.0526245	0.0842553	0	0.0368898	0.0175879	0.0659937	0.0487752	0.0409579	0.10222	0.143331	0.0457522	0.0517955	0.0421197	0.0209771	0.110054	0	0.0248414
chr2	170061443	170015281	+	UBR3	circUBR3	circ14245	-0.392893	0.356197		down_Mturquoise	1	1	1	1	1	1					0	0	0.0416418	0	0.0492879	0	0.0124802	0	0	0	0.0360896	0.0204816	0.0657806	0	0.019575	0.0122966	0.0351758	0.0164984	0	0.0307184	0.122664	0	0	0	0.0280798	0.0104885	0	0	0
chr2	171028339	171046362	-	TLK1	cirCTLK1	circ14264	-0.139703	0.356574			1	1	1	1	1	1			1		1	0	0	0	0.0739318	0	0	0.0167004	0.020615	0	0.00902241	0.0204816	0	0.0120365	0	0.0122966	0.0527637	0.131987	0.0487752	0.0204789	0.0408879	0	0	0	0	0.0104885	0	0	0
chr2	171476950	171448681	+	DCAF17	circDCAF17	circ14287	0.46589	1			1	1	1	1	1	1					0	0	0.0832837	0	0.0246439	0	0.0249604	0	0	0.0100817	0	0	0.0263123	0	0	0.0245932	0.0703516	0.0164984	0	0	0	0.143331	0.0228761	0	0.0421197	0.0209771	0.0275134	0.0139676	0
chr2	179950512	179950926	-	CWC22	circCWC22	circ14372	0.0869871	0.85177		down_Mturquoise	1	1	1	1	1	1					0	0	0.0138806	0	0	0.011529	0.0249604	0	0	0	0.0270672	0.0204816	0.0526245	0.0361094	0.0587249	0	0.0879395	0.0824921	0.0487752	0	0.10222	0.143331	0.0457522	0.0517955	0	0	0	0.0279352	0
chr2	189818180	189791790	+	PMS1	circPMS1	circ14439	-0.167529	0.75695			1	1	1	1	1	1			1	1	1	1	0.0277612	0.0519441	0	0	0.062401	0.0334009	0	0.0806532	0.0451121	0.051204	0.0657806	0.0361094	0.03915	0.0245932	0.0703516	0.0824921	0	0.0511973	0.0613319	0.0859983	0.0228761	0	0.0561596	0.0104885	0.0550268	0.0139676	0
chr2	190673152	190659158	+	NAB1	circNAB1	circ14451	-0.431854	0.154332		down_Mturquoise	1	1	1	1	1	1			1	1	1	1	0.0555224	0.012986	0	0	0.0124802	0.0501013	0	0	0.0180448	0	0.0131561	0.0240729	0	0	0.0351758	0	0	0.0307184	0.0613319	0.0286661	0.0228761	0	0	0	0	0.0419027	0.0248414
chr2	190924593	190900564	+	GLS	circGLS_1	circ14460	0.0156925	0.91091			1	1	1	1	1	1					0	0	0.0138806	0.0389581	0.0492879	0	0.0249604	0.0334009	0.12369	0.0504083	0.0180448	0.051204	0.0131561	0.0120365	0.019575	0	0.0703516	0.0329968	0	0.0102395	0	0.0859983	0	0.0258978	0.0561596	0.0314656	0.0275134	0.0139676	0
chr2	190931637	190900564	+	GLS	circGLS_2	circ14462	0.0413839	0.948049			1	1	1	1	1	1			1	1	1	1	0	0.012986	0.0246439	0	0.0249604	0.0334009	0.04123	0.0100817	0	0.0102408	0	0.0120365	0.019575	0	0.0175879	0	0	0	0	0.0286661	0.0457522	0.0517955	0.0280798	0.0419542	0	0	0.0496829
chr2	195728349	195680032	+	SLC39A10	circSLC39A10	circ14478	-0.989979	0.0072931	down		1	1	1	1	1	1			1		1	0	0	0.0389581	0	0.0345869	0	0	0.020615	0.0100817	0	0.0102408	0.0131561	0	0.019575	0	0.0351758	0	0	0	0	0	0.0228761	0	0.0280798	0.0104885	0.0275134	0	0
chr2	196912882	196920150	-	PGAP1	circPGAP1	circ14513	0.653133	0.0982955			1	1	1	1	1	1					0	0	0.0277612	0	0.0246439	0	0.0249604	0	0.020615	0.0100817	0.0270672	0.0409632	0	0	0.0782999	0.0245932	0.0175879	0	0	0.0204789	0.0408879	0.114664	0	0.0258978	0.0421197	0	0	0.0139676	0
chr2	199308760	199381820	-	SATB2	circSATB2_1	circ14530	-0.337283	0.192196			1	1	1	1	1	1	1	1	1	1	1	1	0.0277612	0.0259721	0.0246439	0.011529	0.0124802	0.0167004	0.020615	0.0100817	0.00902241	0.0204816	0.0131561	0.0361094	0.03915	0	0.0703516	0.0329968	0.0487752	0.0102395	0.0613319	0	0	0	0	0.0734198	0	0.0139676	0
chr2	199348701	199433514	-	SATB2	circSATB2_2	circ14540	-0.0741589	0.625787			1	1	1	1	1	1			1	1	1	1	0.0416418	0.012986	0.0246439	0.0230579	0.0124802	0.0334009	0.020615	0.030245	0.00902241	0.0102408	0.0394684	0	0.0587249	0.0122966	0.0703516	0.0659937	0	0.0102395	0	0.0859983	0.0686283	0.0517955	0	0.0524427	0	0.0279352	0.0372622
chr2	199368605	199433514	-	SATB2	circSATB2_3	circ14542	-0.203669	0.699968		down_Mturquoise	1	1	1	1	1	1	1	1	1	1	1	1	0.152687	0	0	0.0461158	0.237124	0	0.267995	0	0.144359	0.143371	0	0.252766	0	0.0614831	0	0.164984	0	0	0.347547	0	0	0.129489	0	0	0.137567	0	0.0621036
chr2	199380364	199433514	-	SATB2	circSATB2_4	circ14544	-0.554231	0.032358	down	down_Mturquoise	1	1	1	1	1	1			1	1	1	1	0.0138806	0.012986	0.0492879	0.0230579	0.0499208	0.0334009	0.020615	0.0201633	0.0360896	0.0614448	0.0394684	0.0120365	0.0782999	0.0122966	0.0527637	0.0659937	0.0243876	0.0204789	0.020444	0.0286661	0.0686283	0	0.0280798	0.0314656	0	0.0419027	0
chr2	202467689	202464809	+	BMPR2	circBMPR2_1	circ14613	0.0559281	0.882231			1	1	1	1	1	1	1	1	1	1	1	1	0.0555224	0.19479	0.0246439	0.0691737	0.0249604	0.0668018	0.12369	0.0705716	0.0541345	0.0716856	0.0657806	0.120365	0.215325	0.0245932	0.0879395	0.164984	0.0731628	0.0614368	0.143108	0.286661	0.114381	0	0.0982794	0.0629312	0.16508	0.209514	0.124207
chr2	202556531	202555252	+	BMPR2	circBMPR2_2	circ14627	-0.426327	0.173778		down_Mturquoise	1	1	1	1	1	1			1		1	0	0.0416418	0.012986	0	0.011529	0	0	0.020615	0.0100817	0.00902241	0.0204816	0	0	0	0.0122966	0	0.0164984	0	0	0.0408879	0.0286661	0	0	0.0561596	0.0104885	0	0.0419027	0
chr2	207976651	207977586	-	PLEKHM3	circPLEKHM3	circ14747	0.161014	0.189221			1	1	1	1	1	1	1	1	1	1	1	1	0.0832837	0.0909022	0.0985758	0.0461158	0.0124802	0.116903	0.020615	0.0403266	0.0902241	0.0614448	0.157874	0.0601824	0.019575	0	0.123115	0.0329968	0.0731628	0.0409579	0.143108	0.200663	0.0686283	0.258978	0.0280798	0.0734198	0.192594	0.097773	0.0248414
chr2	210153495	210154611	-	KANSL1L	circKANSL1L	circ14776	0.0371072	0.444586		down_Mturquoise	1	1	1	1	1	1	1	1	1	1	1	1	0.0138806	0.0259721	0	0	0.0499208	0.0334009	0.04123	0.0201633	0.0270672	0.0204816	0.0263123	0.0240729	0.019575	0.0245932	0.0175879	0	0.0243876	0.0307184	0.0817759	0.0286661	0	0.0258978	0.0421197	0.0314656	0.0550268	0	0
chr2	222909150	222900674	+	ACSL3	circACSL3	circ14901	0.429958	0.166715			1	1	1	1	1	1					0	0	0.0138806	0	0	0.011529	0.0124802	0.0167004	0	0.0100817	0	0.0102408	0.0131561	0.0120365	0.0782999	0	0.0351758	0.0164984	0.0243876	0.0204789	0	0	0.0457522	0.0776933	0	0	0	0.0558703	0.0248414
chr2	226914351	226864604	+	RHBDD1	circRHBDD1_1	circ15003	0.197494	0.322107			1	1	1	1	1	1			1		1	0	0.0416418	0.0519441	0	0.011529	0.0499208	0.0167004	0.04123	0.030245	0.0360896	0.0716856	0.105249	0.0722188	0.03915	0.0368898	0.0351758	0.0494953	0.0243876	0.0204789	0	0.171997	0.0228761	0.0517955	0.0140399	0.0314656	0	0.0698379	0.0248414
chr2	226914351	226906793	+	RHBDD1	circRHBDD1_2	circ15004	0.317049	0.189656			1	1	1	1	1	1	1	1	1		1	1	0	0.012986	0	0.0345869	0	0.0167004	0.04123	0.0201633	0.0270672	0.0102408	0.0263123	0.0120365	0.019575	0.0122966	0.0351758	0	0	0.0102395	0	0	0.0228761	0	0	0	0	0.0279352	0
chr2	228016406	228020156	-	SPHKAP	circSPHKAP	circ15015	0.112474	0.548966			1	1	1	1	1	1					0	0	0	0	0	0.0230579	0.0249604	0	0.020615	0.0201633	0.0180448	0.0102408	0	0.0361094	0.0587249	0.0122966	0	0	0	0	0.020444	0	0	0	0.0982794	0.0209771	0	0.0139676	0.0496829
chr2	229858772	229880128	-	TRIP12	circTRIP12	circ15044	0.079723	0.687413			1	1	1	1	1	1			1	1	1	1	0.0277612	0.0649301	0	0.0345869	0.0249604	0.0334009	0	0	0.0541345	0	0.0263123	0.0722188	0.0782999	0	0.0527637	0.0164984	0	0.0102395	0.122664	0.143331	0	0	0.0140399	0.0943969	0.110054	0.0279352	0
chr2	232761436	232747615	+	GIGYF2	circGIGYF2_1	circ15118	-0.0641828	0.939895		down_Mturquoise	1	1	1	1	1	1	1	1	1	1	1	1	0	0.0389581	0.12322	0.011529	0	0	0	0.030245	0.0270672	0.0307224	0.0526245	0.0240729	0.019575	0.0368898	0.0351758	0	0.0243876	0.0307184	0.143108	0.200663	0.160133	0.181284	0.0140399	0.0629312	0.0550268	0.0279352	0.0248414
chr2	232796221	232787150	+	GIGYF2	circGIGYF2_2	circ15120	-0.365406	0.261896			1	0	1	1	1	1			1	1	1	1	0.0277612	0.0259721	0.0739318	0.0345869	0	0	0.04123	0.0100817	0.0180448	0.0204816	0	0.0120365	0.019575	0	0.0175879	0.0164984	0	0.0204789	0.020444	0.0286661	0.0457522	0	0.0140399	0.0419542	0.0550268	0.0279352	0.0124207
chr2	235750488	235740963	+	AGAP1	circAGAP1	circ15148	0.124082	0.529692			1	1	1	1	1	1	1	1	1	1	1	1	0.0138806	0	0.0246439	0	0.0124802	0.0167004	0	0.0201633	0.0270672	0.0102408	0.0789368	0.0361094	0.03915	0	0.0351758	0	0	0.0307184	0.10222	0.0573322	0	0	0.0140399	0.0209771	0.0825402	0.0419027	0
chr2	238182065	238185287	-	ILKAP	circILKAP	circ15189	-0.211094	0.21409			1	1	1	1	1	1					0	0	0.0277612	0.0389581	0.0985758	0.011529	0.0499208	0.100203	0.0824599	0.0403266	0.0631569	0.0921672	0.0131561	0.132401	0.019575	0.0122966	0.0879395	0.115489	0.0243876	0.0204789	0.163552	0.229329	0.137257	0.0258978	0.0561596	0.0209771	0.110054	0.0279352	0
chr2	239990074	240007370	-	NDUFA10	circNDUFA10	circ15231	-0.0428351	0.983985			1	1	1	1	1	1					0	0	0.0277612	0.012986	0.0246439	0.0230579	0.0249604	0.0167004	0.020615	0.030245	0.0180448	0	0.0131561	0	0.03915	0.0122966	0	0.0164984	0	0.0204789	0.0408879	0.0286661	0.0228761	0	0	0.0209771	0	0	0
chr20	2965202	2964272	+	PTPRA	circPTPRA	circ12815	0.305407	0.0759722		down_Mturquoise	1	1	1	1	1	1	1	1	1	1	1	1	0.0138806	0.012986	0	0.0691737	0.0374406	0	0.04123	0.0403266	0.0180448	0.0409632	0.0920929	0.0361094	0.019575	0.0491865	0.0703516	0.0494953	0	0	0	0	0.0457522	0.0258978	0.0421197	0.0209771	0.110054	0.0419027	0.0124207
chr20	3945177	3974400	-	RNF24	circRNF24	circ13002	0.24868	0.511341		down_Mturquoise	1	1	1	1	1	1					0	0	0	0.0259721	0.12322	0	0.0249604	0	0.061845	0.0100817	0.0180448	0.0102408	0.0263123	0.0361094	0	0.0122966	0	0.0329968	0	0.0204789	0.0817759	0.0286661	0	0	0.0140399	0	0	0	0
chr20	9557608	9566384	-	PAK5	circPAK5	circ13241	-0.302974	0.139908			1	1	1	1	1	1			1	1	1	1	0.0277612	0.0519441	0	0.011529	0.0124802	0	0.020615	0.0201633	0.0270672	0	0	0.0481459	0	0.0122966	0	0	0.0243876	0.0307184	0.0408879	0	0	0	0.0280798	0.0104885	0	0.0139676	0.0248414
chr20	23389946	23403072	-	NAPB	circNAPB	circ12805	-0.105241	0.776023			1	1	1	1	1	1					0	0	0.0555224	0	0.0246439	0	0.0249604	0.0167004	0	0.0100817	0.0180448	0	0	0.0120365	0.03915	0.0122966	0	0.0164984	0	0	0	0	0	0	0.0421197	0.0314656	0.0550268	0.0139676	0.0124207
chr20	32316874	32316218	+	KIF3B	circKIF3B	circ12826	0.319902	0.409915			1	1	1	1	1	1	1	1	1	1	1	1	0	0	0.0246439	0.011529	0.0124802	0.0167004	0	0.0201633	0.00902241	0	0	0	0	0	0.0175879	0.0659937	0.0243876	0	0	0.114664	0	0.0517955	0.0140399	0.0104885	0.0275134	0	0
chr20	32369123	32366384	+	ASXL1	circASXL1	circ12827	0.313892	0.0686374			1	1	1	1	1	1	1	1	1	1	1	1	0.0416418	0.0519441	0.0985758	0.0807027	0.0374406	0.0334009	0.04123	0.0403266	0.0631569	0.0716856	0.0131561	0.0962918	0.0587249	0.0122966	0.0351758	0.0824921	0.0487752	0.0307184	0.020444	0.229329	0.0228761	0.103591	0.0280798	0.0314656	0	0.0139676	0.0124207
chr20	33623296	33619517	+	CBFA2T2	circCBFA2T2	circ12861	0.652563	0.00229245	up		1	1	1	1	1	1					0	0	0.0138806	0.0259721	0.0492879	0	0.0873614	0.0167004	0.04123	0.0201633	0.0360896	0.0204816	0.0526245	0.0722188	0.19575	0.0491865	0.0703516	0.0989905	0.0731628	0.0307184	0.0613319	0.171997	0.0228761	0.0258978	0.0982794	0.0419542	0.0275134	0.111741	0.0621036
chr20	34492597	34470048	+	ITCH	circITCH	circ12895	0.204354	0.308456			1	1	1	1	1	1					0	0	0.0277612	0	0.0246439	0.011529	0.0249604	0	0.103075	0.0201633	0.0541345	0.0307224	0.0526245	0.0120365	0.019575	0.0122966	0.0175879	0	0	0.0204789	0.143108	0.114664	0.0686283	0	0.0701996	0.0314656	0.0550268	0.0139676	0
chr20	35714185	35725155	-	RBM39	circRBM39_1	circ12921	0.00608828	0.989795			1	1	1	1	1	1					0	0	0	0	0	0	0.0998416	0.100203	0.185535	0	0.0812017	0.0819264	0.131561	0	0	0	0.105527	0.131987	0	0.0511973	0.306659	0	0.114381	0.155387	0.196559	0.0943969	0.0825402	0	0
chr20	35729312	35732135	-	RBM39	circRBM39_2	circ12932	0.251172	0.154635			1	1	1	1	1	1					0	0	0.0138806	0.12986	0.0246439	0.0922316	0	0.0167004	0.061845	0.030245	0.0360896	0.0409632	0.0526245	0.0361094	0.0587249	0.0368898	0.0351758	0	0.0731628	0.0921552	0.10222	0.0859983	0.0686283	0	0.0421197	0.157328	0.0825402	0.0838055	0
chr20	38066256	38057532	+	RPRD1B	circRPRD1B	circ12987	0.391727	0.181826			1	1	1	1	1	1					0	0	0	0.012986	0.0492879	0.011529	0	0	0	0.0100817	0.00902241	0	0.0263123	0.0120365	0	0	0.0351758	0.0659937	0.0243876	0.0102395	0.0817759	0.0573322	0.0228761	0.0258978	0	0	0.0550268	0.0279352	0.0124207
chr20	38994880	38983699	+	DHX35	circDHX35	circ12998	0.417061	0.165602		down_Mturquoise	1	1	1	1	1	1					0	0	0	0	0	0	0	0	0	0.0403266	0	0.0409632	0.0263123	0.0361094	0	0	0.0527637	0	0.0243876	0	0.0817759	0.114664	0	0.0258978	0.0421197	0.0419542	0.0275134	0	0.0124207
chr20	41101353	41092472	+	TOP1	circTOP1	circ13010	-0.0784948	0.953088			1	1	1	1	1	1			1		1	0	0.0138806	0	0	0	0	0	0	0	0.00902241	0	0	0.0361094	0.03915	0	0	0.0494953	0	0	0.0408879	0.0859983	0.0686283	0.0517955	0.0280798	0.0104885	0.0275134	0	0.0248414
chr20	41267463	41269083	-	ZHX3	circZHX3	circ13018	0.487443	0.0580425			1	1	1	1	1	1					0	0	0	0.0649301	0.0492879	0	0.0124802	0	0	0	0.00902241	0	0.0526245	0.0481459	0.019575	0	0.0175879	0.0164984	0	0.0204789	0.020444	0.0286661	0.0228761	0	0.0280798	0.0209771	0	0.0558703	0
chr20	41533050	41551360	-	CHD6	circCHD6	circ13024	-0.437492	0.226667			1	1	1	1	1	1			1	1	1	1	0.0416418	0.0259721	0.0492879	0.011529	0.0124802	0	0.04123	0	0	0.0204816	0.0131561	0.0361094	0.019575	0	0	0.0659937	0	0.0102395	0.020444	0	0.0915045	0	0.0140399	0.0104885	0.0275134	0	0.0124207
chr20	47633636	47623911	+	NCOA3	circNCOA3	circ13085	-0.0301893	0.775699			1	1	1	1	1	1					0	0	0	0.0259721	0	0	0.0374406	0	0	0.0100817	0.0270672	0.0409632	0.0394684	0.0120365	0	0.0245932	0.0703516	0.0494953	0.0243876	0	0	0	0	0	0	0.0104885	0	0	0.0248414
chr20	48963898	48953556	+	ARFGEF2	circARFGEF2	circ13099	0.365573	0.233974		down_Mturquoise	1	1	1	1	1	1					0	0	0.0138806	0	0	0.011529	0.0374406	0	0	0.0201633	0.0270672	0.0204816	0.0131561	0.0120365	0.019575	0.0122966	0.0175879	0.0164984	0	0.0102395	0	0.114664	0.0228761	0.0517955	0.0421197	0.0104885	0.0275134	0.0279352	0
chr20	49135833	49166285	-	STAU1	circSTAU1	circ13131	0.409762	0.209317		down_Mturquoise	1	1	1	1	1	1					0	0	0.0138806	0.0259721	0	0.011529	0.0499208	0	0	0.0403266	0.0270672	0.0204816	0.0131561	0.0361094	0	0	0.0703516	0.0164984	0	0.0102395	0.0408879	0	0.0686283	0	0.0140399	0.0209771	0.0550268	0	0.0124207
chr20	51656938	51690819	-	ATP9A	circATP9A_1	circ13154	-0.265798	0.435073		down_Mturquoise	1	1	1	1	1	1					0	0	0.0138806	0.012986	0	0	0	0.0167004	0	0.0403266	0	0	0.0526245	0.0120365	0.0587249	0	0.0351758	0	0.0243876	0.0204789	0.0613319	0.0286661	0	0	0.0280798	0.0209771	0.0275134	0.0279352	0
chr20	51674153	51690819	-	ATP9A	circATP9A_2	circ13162	0.0298607	0.838432			1	1	1	1	1	1					0	0	0.0138806	0	0.0246439	0	0	0.0334009	0.020615	0	0.00902241	0	0.0131561	0.0120365	0.03915	0	0.0175879	0	0.0731628	0.0102395	0.020444	0.114664	0.0457522	0	0.0140399	0	0.0275134	0	0.0124207
chr20	58441083	58438945	+	VAPB	circVAPB	circ13184	0.00615085	0.925961			1	1	1	1	1	1					0	0	0	0.0259721	0.0246439	0	0.0249604	0.0167004	0	0	0.00902241	0.0102408	0	0.0240729	0.019575	0	0	0.0329968	0	0	0.0613319	0.143331	0	0	0.0280798	0.0104885	0.0550268	0.0279352	0.0124207
chr20	59841535	59840369	+	PHACTR3	circPHACTR3	circ13198	-0.343994	0.387201			1	1	1	1	1	1					0	0	0.0277612	0.012986	0.0492879	0.011529	0	0	0	0.0201633	0.0360896	0.0102408	0.0131561	0.0361094	0	0	0	0.0164984	0	0.0102395	0.020444	0.0286661	0.0228761	0	0.0280798	0.0104885	0	0.0139676	0
chr20	62139075	62140944	-	PSMA7	circPSMA7	circ13202	0.260549	0.169023			1	1	1	1	1	1					0	0	0.0694031	0.0389581	0.0492879	0.0461158	0.0374406	0.0668018	0.0824599	0.0504083	0.00902241	0.0204816	0.0263123	0.0842553	0.0587249	0.0368898	0.0703516	0.0164984	0.0731628	0.0102395	0.143108	0.143331	0.137257	0.0517955	0.0421197	0.0419542	0.0550268	0.0558703	0.0496829
chr21	15014344	15043574	-	NRIP1	circNRIP1	circ13367	0.0592768	0.746969			1	1	1	1	1	1	1	1	1	1	1	1	0	0.012986	0.0492879	0.011529	0.0249604	0	0.020615	0.0100817	0.0180448	0	0.0263123	0	0	0	0.0351758	0.0494953	0	0.0204789	0	0.0286661	0	0.0258978	0.0140399	0.0104885	0	0.0279352	0
chr21	15766141	15762891	+	USP25	circUSP25	circ13378	0.084016	0.714156		down_Mturquoise	1	1	1	1	1	1			1	1	1	1	0.0138806	0	0	0	0.0124802	0	0.020615	0.0504083	0.00902241	0.0409632	0.0131561	0.0120365	0	0	0	0.0329968	0.0243876	0.0511973	0.0408879	0	0.0457522	0	0.0701996	0.0104885	0	0.0279352	0.0124207
chr21	21292241	21280578	+	NCAM2	circNCAM2	circ13474	0.57582	0.0895183		down_Mturquoise	1	1	1	1	1	1	1	1	1	1	1	1	0	0	0	0	0.0124802	0	0.0824599	0.0201633	0.0451121	0	0.0394684	0.0120365	0.019575	0	0.0175879	0.0164984	0	0	0.0408879	0.0286661	0.0228761	0.0517955	0	0	0	0	0
chr21	29329693	29321221	+	BACH1	circBACH1	circ13566	-0.0917077	0.586751			1	1	1	1	1	1	1	1	1	1	1	1	0.23597	0.168818	0.172508	0.0807027	0.212163	0.0334009	0.226765	0.141143	0.135336	0.184334	0.263123	0.276839	0.332775	0.122966	0.158291	0.0659937	0.0731628	0.174071	0.122664	0.257995	0.0228761	0.0776933	0.210599	0.167817	0.247621	0.153643	0.0869451
chr21	31164962	31195305	-	TIAM1	circTIAM1_1	circ13579	0.00715032	0.910188		down_Mturquoise	1	1	1	1	1	1	1	1	1	1	1	1	0	0.0389581	0	0.0230579	0.0374406	0	0.020615	0.0100817	0.0451121	0.0716856	0	0	0.019575	0.0122966	0	0	0	0	0.122664	0	0	0	0	0	0.0275134	0.0558703	0
chr21	31182421	31203012	-	TIAM1	circTIAM1_2	circ13584	0.102377	0.544445			1	1	1	1	1	1					0	0	0.0138806	0.012986	0	0	0	0	0.061845	0.0201633	0.00902241	0.051204	0.0131561	0.0120365	0	0	0.0175879	0.0164984	0	0	0.020444	0.0573322	0.0228761	0.0258978	0	0	0.0550268	0	0.0372622
chr21	36248568	36247517	+	DOPEY2	circDOPEY2	circ13720	-0.0861856	0.890298			1	1	1	1	1	1					0	0	0.0277612	0	0	0.011529	0	0	0.103075	0.0604899	0.0451121	0.0409632	0.0526245	0.0481459	0.019575	0	0.211055	0.0494953	0.0243876	0.0409579	0.0613319	0.0573322	0.274513	0.0258978	0.140399	0.0209771	0.0550268	0	0
chr21	39206108	39212707	-	BRWD1	circBRWD1_1	circ13769	0.00287295	0.893323			1	1	1	1	1	1					0	0	0	0.012986	0.0246439	0	0	0.0334009	0.020615	0	0.00902241	0	0	0.0361094	0.03915	0.0122966	0.0351758	0.0659937	0	0.0102395	0.020444	0.114664	0	0.0258978	0	0.0209771	0.0275134	0.0139676	0
chr21	39206108	39229436	-	BRWD1	circBRWD1_2	circ13772	0.355194	0.275914		down_Mturquoise	1	1	1	1	1	1					0	0	0	0.012986	0	0.011529	0	0	0	0	0.0180448	0	0	0	0	0.0122966	0	0.0329968	0	0.0102395	0	0.0286661	0.0228761	0	0	0	0.0275134	0.0139676	0.0124207
chr21	45134832	45128402	+	ADARB1	circADARB1	circ13923	-0.234927	0.100114		down_Mturquoise	1	1	1	1	1	1					0	0	0.0971643	0.0649301	0.0492879	0.0922316	0.0374406	0.0501013	0.04123	0.0403266	0.0360896	0.051204	0.0920929	0.0601824	0.0587249	0.0491865	0.0351758	0.0494953	0.0243876	0.0511973	0.143108	0.0573322	0.0228761	0	0.0982794	0.0209771	0	0.0838055	0.0621036
chr22	17047426	17044873	+	CECR7	circCECR7	circ14829	0.0594368	0.806705			1	1	1	1	1	1					0	0	0.0555224	0	0	0.011529	0.0499208	0.0334009	0.04123	0.0100817	0.0180448	0.0102408	0.0263123	0.0481459	0	0	0.0703516	0.0164984	0.0243876	0.0102395	0.020444	0.200663	0.0228761	0	0.0421197	0.0209771	0	0.0139676	0.0124207
chr22	20934244	20933779	+	CRKL	circCRKL	circ14882	-0.00303344	0.963276			1	1	1	1	1	1	1	1	1	1	1	1	0.0694031	0.0259721	0.0492879	0.0230579	0.0748812	0.0835022	0.04123	0.030245	0.108269	0.0921672	0.0920929	0.0481459	0.137025	0	0.105527	0.0824921	0.0975504	0.0204789	0.245328	0.171997	0.160133	0	0.0561596	0.0209771	0.0550268	0.0558703	0.0248414
chr22	24313466	24302195	+	SPECC1L,SPECC1L-ADORA2A	circSPECC1L_1	circ14930	-0.595052	0.0974978			1	1	1	1	1	1			1		1	0	0.0138806	0	0	0	0.0499208	0.0167004	0	0.0504083	0	0	0	0.0240729	0.019575	0.0122966	0.0175879	0.0659937	0	0.0204789	0.0408879	0.0573322	0.0228761	0	0.0140399	0.0104885	0	0	0
chr22	24369320	24302195	+	SPECC1L,SPECC1L-ADORA2A	circSPECC1L_2	circ14945	0.397711	0.0546515			1	1	1	1	1	1			1		1	0	0	0.0389581	0.0246439	0	0.0124802	0.0501013	0	0.0504083	0.0541345	0	0.0394684	0.0120365	0.019575	0	0.0175879	0	0.0487752	0	0	0	0	0	0.0140399	0	0.0275134	0.0139676	0.0124207
chr22	27894555	27914347	-	PITPNB	circPITPNB	circ15013	-0.304735	0.239148			1	1	1	1	1	1			1	1	1	1	0.0138806	0.0259721	0.0739318	0.0345869	0.0124802	0	0.04123	0	0.00902241	0	0.0131561	0	0.0587249	0	0.0175879	0.0329968	0	0.0102395	0.020444	0	0	0.0258978	0.0561596	0.0314656	0.0825402	0.0558703	0
chr22	28296198	28297852	-	TTC28	circTTC28	circ15016	-0.166741	0.754527		down_Mturquoise	1	1	1	1	1	1			1	1	1	1	0	0.0259721	0	0.0345869	0	0.0167004	0.020615	0.0201633	0.0180448	0	0.0394684	0.0240729	0	0	0	0.0164984	0	0	0.0408879	0	0.0457522	0	0	0.0104885	0.0275134	0.0838055	0
chr22	32479275	32478981	+	FBXO7	circFBXO7_1	circ15109	0.164556	0.161014			1	1	1	1	1	1			1		1	0	0.0555224	0	0.12322	0.0807027	0.137282	0.0835022	0.144305	0.0806532	0.0721793	0.0921672	0.131561	0.0962918	0.0587249	0.0122966	0.158291	0.0659937	0.0487752	0.0511973	0.265772	0.143331	0.297389	0.0776933	0.140399	0.0419542	0.110054	0.0419027	0.0372622
chr22	32485209	32478981	+	FBXO7	circFBXO7_2	circ15110	0.458469	0.0879089		down_Mturquoise	1	1	1	1	1	1					0	0	0.0277612	0	0	0	0.0124802	0.0334009	0.020615	0.0504083	0.00902241	0.0102408	0.0131561	0.0361094	0	0	0.0351758	0.0329968	0.0243876	0.0102395	0.020444	0.0286661	0.0228761	0	0.0421197	0.0209771	0.0275134	0	0
chr22	38494630	38501280	-	DDX17	circDDX17	circ15203	-0.28975	0.314848			1	1	1	1	1	1					0	0	0	0.0259721	0	0.0230579	0.0249604	0	0	0.0201633	0.0270672	0.0204816	0.0263123	0.0240729	0.03915	0.0122966	0.0351758	0.0164984	0	0	0.0408879	0	0	0	0.0561596	0.0104885	0.0275134	0	0.0372622
chr22	40156182	40117055	+	TNRC6B	circTNRC6B	circ15236	0.0616882	0.680346			1	1	1	1	1	1			1	1	1	1	0.0416418	0.0779162	0	0.0691737	0.062401	0.100203	0.04123	0.0806532	0.0812017	0.051204	0.0920929	0.132401	0	0.0122966	0.0351758	0.0329968	0.0975504	0.0409579	0.0613319	0	0.0228761	0.0258978	0.0982794	0.115374	0.110054	0.0698379	0.0496829
chr22	45718493	45689712	+	ATXN10	circATXN10_1	circ15397	-0.155822	0.580848		down_Mviolet	1	1	1	1	1	1	1	1	1	1	1	1	0	0.0259721	0	0.011529	0.0249604	0	0.04123	0	0	0.0307224	0	0.0240729	0	0	0	0	0	0.0204789	0.0613319	0	0	0	0	0.0419542	0	0	0.0621036
chr22	45740538	45689712	+	ATXN10	circATXN10_2	circ15404	-0.230849	0.535026			1	1	1	1	1	1	1	1	1	1	1	1	0.0277612	0.0519441	0	0.0230579	0	0	0.020615	0.0100817	0.0180448	0.0204816	0.0263123	0.0481459	0.019575	0	0.0175879	0.0329968	0	0.0102395	0	0.0573322	0.0228761	0.0258978	0.0561596	0.0209771	0	0.0419027	0.0124207
chr22	45740538	45700282	+	ATXN10	circATXN10_3	circ15406	-0.151959	0.555896		up_Mdarkred	1	1	1	1	1	1	1	1	1	1	1	1	0.0277612	0	0.0985758	0	0.0249604	0.0668018	0	0.030245	0	0.0921672	0.0394684	0.0722188	0.019575	0	0.0527637	0	0	0.0307184	0.10222	0.0859983	0.0457522	0.0258978	0.0421197	0.0629312	0.0550268	0.0419027	0.0621036
chr22	45740538	45729425	+	ATXN10	circATXN10_4	circ15409	0.10327	0.4924			1	1	1	1	1	1	1	1	1	1	1	1	0.0138806	0.0389581	0.147864	0.0230579	0.062401	0.167004	0.0824599	0.0907349	0.0992465	0.0307224	0.17103	0.0601824	0.11745	0.0368898	0.0879395	0.115489	0.0975504	0.0511973	0.20444	0.257995	0.114381	0.0258978	0.0561596	0.0524427	0.0550268	0.111741	0.0124207
chr22	50394135	50372020	+	PPP6R2	circPPP6R2	circ15448	0.399836	0.0843879			1	1	1	1	1	1			1		1	0	0	0.0389581	0.0492879	0.0576448	0	0.0668018	0	0.0100817	0.00902241	0.0204816	0.0131561	0.0481459	0.0782999	0.0122966	0	0.0659937	0.0243876	0.0204789	0	0.171997	0	0.0517955	0.0701996	0.0629312	0.0825402	0.0139676	0.0124207
chr3	17014911	17009674	+	PLCL2	circPLCL2	circ17228	-0.128486	0.836069		down_Mturquoise	1	1	1	1	1	1	1	1	1	1	1	1	0	0.0389581	0.0492879	0	0.0124802	0	0.020615	0.0201633	0.0180448	0.0716856	0	0.0481459	0	0.0122966	0.0175879	0.0164984	0.0487752	0.0102395	0.0613319	0	0.0457522	0.0517955	0.0421197	0.0524427	0.110054	0.0139676	0
chr3	18378170	18420991	-	SATB1	circSATB1_1	circ17425	-0.173271	0.255247			1	1	1	1	1	1					0	0	0.0971643	0.12986	0.0985758	0.138347	0.137282	0.0167004	0.061845	0.030245	0.108269	0.051204	0.0263123	0.156474	0.019575	0.0983729	0.0175879	0.181483	0.121938	0.0716763	0.020444	0.0573322	0.0228761	0.0258978	0.140399	0.0629312	0.16508	0.0419027	0.0869451
chr3	18415111	18420991	-	SATB1	circSATB1_2	circ17434	0.265166	0.545194		down_Mturquoise	1	1	1	1	1	1					0	0	0.0138806	0.012986	0.0492879	0.011529	0	0	0	0.0100817	0.0180448	0.0204816	0.0263123	0	0	0	0	0.0164984	0.0487752	0.0102395	0.020444	0	0.0228761	0	0	0.0104885	0.0275134	0.0419027	0
chr3	27379249	27424152	-	SLC4A7	circSLC4A7_1	circ17709	-0.548687	0.0445903	down	down_Mturquoise	1	1	1	1	1	1			1		1	0	0.0971643	0.0259721	0.246439	0	0.0249604	0.0167004	0	0.0403266	0.0902241	0	0	0.0481459	0.0782999	0.0860763	0.0703516	0	0.0731628	0.102395	0	0	0	0	0.112319	0	0.0550268	0.0139676	0.0496829
chr3	27383153	27424152	-	SLC4A7	circSLC4A7_2	circ17714	-0.071644	0.715134		down_Mturquoise	1	1	1	1	1	1			1		1	0	0.0971643	0.012986	0.0492879	0	0.0374406	0.0167004	0.020615	0.0705716	0.0451121	0.0614448	0.0657806	0.0481459	0	0.0122966	0.123115	0.0329968	0	0	0.0613319	0	0.114381	0.129489	0.0140399	0.0209771	0.0275134	0.0279352	0
chr3	33068230	33068970	-	GLB1	circGLB1	circ17776	0.110579	0.609893			1	1	1	1	1	1			1		1	0	0	0.0259721	0.0246439	0.011529	0.0249604	0.0167004	0	0.0201633	0.0180448	0	0.0263123	0.0120365	0.03915	0.0368898	0.0175879	0.0494953	0	0	0.020444	0.114664	0.0686283	0	0.0140399	0.0209771	0.0275134	0	0
chr3	35691005	35679787	+	ARPP21	circARPP21	circ17833	0.0772404	0.563177			1	1	1	1	1	1			1	1	1	1	0.0277612	0.0389581	0	0.0807027	0.0249604	0.0334009	0.020615	0.030245	0.0541345	0.0614448	0.0657806	0.0481459	0.0978749	0.0245932	0.0703516	0.0989905	0	0.0614368	0.10222	0.0286661	0	0	0.0421197	0.0629312	0.110054	0.0419027	0.0248414
chr3	47037666	47046621	-	SETD2	circSETD2	circ17982	-0.234009	0.473899		down_Mturquoise	1	1	1	1	1	1					0	0	0.0138806	0.012986	0.0246439	0	0.0374406	0.0668018	0.04123	0.0100817	0.0631569	0.0409632	0.0526245	0.0240729	0.019575	0	0.0175879	0.0329968	0	0.0204789	0.10222	0	0	0	0	0.0209771	0	0.0139676	0.0124207
chr3	47425485	47428670	-	SCAP	circSCAP	circ18022	-0.402229	0.144889			1	1	1	1	1	1					0	0	0.0138806	0.0259721	0	0.011529	0.0124802	0.0167004	0.020615	0.030245	0.0180448	0.0204816	0.0131561	0.0120365	0	0.0122966	0	0.0494953	0	0.0204789	0.0408879	0	0.0457522	0	0.0140399	0.0209771	0	0.0419027	0.0124207
chr3	50066502	50065031	+	RBM6	circRBM6	circ18123	-0.0606266	0.536378			1	1	1	1	1	1					0	0	0.0138806	0.0389581	0.0492879	0.0461158	0	0.0668018	0.04123	0.0100817	0.00902241	0.0102408	0.0131561	0.0361094	0	0	0.0351758	0.0989905	0	0.0102395	0.020444	0	0.0228761	0.0258978	0.0140399	0	0	0	0.0248414
chr3	55683794	55950560	-	ERC2	circERC2_1	circ18237	0.234654	0.764189			0	0	1	1	1	1			1		1	0	0.0277612	0	0.0246439	0	0	0	0	0.0201633	0.0360896	0.0204816	0.0526245	0.0240729	0.019575	0	0.0175879	0.0164984	0	0.0204789	0	0.0573322	0	0	0	0.0104885	0	0.0139676	0
chr3	55683794	55992250	-	ERC2	circERC2_2	circ18238	0.121226	0.739001			0	0	1	1	1	1			1	1	1	1	0.0277612	0.103888	0.12322	0.0691737	0.0499208	0	0.0824599	0.0806532	0	0.102408	0.105249	0.132401	0.176175	0.0245932	0	0.346467	0.243876	0.112634	0.0817759	0.286661	0.183009	0.207182	0.0561596	0.157328	0.220107	0.223481	0.136628
chr3	55888389	55950560	-	ERC2	circERC2_3	circ18246	0.193088	0.44947		down_Mturquoise	1	1	1	1	1	1			1	1	1	1	0.0694031	0	0.0739318	0.0461158	0.0374406	0.0167004	0.04123	0.0403266	0.0451121	0.0614448	0.0263123	0.0601824	0.0782999	0.0122966	0.193467	0.115489	0.0731628	0.112634	0.143108	0.0286661	0.137257	0.0258978	0.0140399	0.0839083	0.0550268	0.0139676	0.0372622
chr3	55950425	55992250	-	ERC2	circERC2_4	circ18252	0.110889	0.655885		down_Mturquoise	1	1	1	1	1	1			1	1	1	1	0	0.012986	0.0246439	0.011529	0	0.0334009	0	0.0100817	0.0180448	0	0	0.0240729	0	0	0.0175879	0.0494953	0	0.0102395	0.0613319	0.0286661	0	0	0	0.0209771	0	0	0.0124207
chr3	56567053	56566594	+	CCDC66	circCCDC66_1	circ18268	-0.675929	0.0219908	down		1	1	1	1	1	1					0	0	0.0277612	0.0259721	0	0	0	0	0.04123	0.0201633	0.0270672	0.0307224	0	0	0	0	0	0	0	0	0.0613319	0	0	0	0.0561596	0	0.0275134	0.0279352	0
chr3	56594028	56592970	+	CCDC66	circCCDC66_2	circ18273	0.288048	0.328708			1	1	1	1	1	1					0	0	0.0138806	0	0.0246439	0	0.0124802	0.0668018	0	0.0100817	0	0.0409632	0	0.0240729	0	0.0245932	0	0.0164984	0.0243876	0	0.020444	0.0573322	0	0.0517955	0	0.0104885	0	0.0698379	0.0124207
chr3	56624479	56673725	-	FAM208A	circFAM208A_1	circ18278	0.253279	0.244866			1	1	1	1	1	1			1	1	1	1	0	0	0.0246439	0.0230579	0.0124802	0.0334009	0	0.0201633	0.0360896	0	0.0131561	0.0361094	0.019575	0	0.0175879	0	0	0.0102395	0.020444	0	0.0228761	0	0.0701996	0.0209771	0.0550268	0.0279352	0.0124207
chr3	56660731	56673725	-	FAM208A	circFAM208A_2	circ18288	0.0283525	0.883283			1	1	1	1	1	1			1	1	1	1	0.0694031	0.0259721	0.0739318	0.0345869	0.062401	0.0334009	0.0824599	0.0201633	0.0992465	0.0409632	0.0920929	0.0722188	0.0978749	0.0122966	0.0527637	0.0494953	0.0243876	0.0307184	0.143108	0.114664	0.114381	0.0517955	0.0701996	0.0839083	0.192594	0.0139676	0.0248414
chr3	57267792	57242856	+	APPL1	circAPPL1	circ18303	0.309104	0.34789			1	1	1	1	1	1					0	0	0.0277612	0.0259721	0	0	0.0124802	0.0334009	0.04123	0.030245	0.0270672	0.0102408	0.0263123	0	0.0587249	0	0	0	0	0	0.0408879	0.114664	0	0.0258978	0.0280798	0.0209771	0	0.0139676	0
chr3	63913225	63912588	+	ATXN7	circATXN7	circ18370	0.182168	0.391319			1	1	1	1	1	1	1	1	1	1	1	1	0.0694031	0.0649301	0	0.011529	0.062401	0	0.020615	0.0504083	0.00902241	0.0921672	0.0789368	0.0842553	0.11745	0	0	0	0.0243876	0.0204789	0.020444	0.200663	0	0.0258978	0.0982794	0.14684	0.0550268	0	0.0372622
chr3	65429520	65430881	-	MAGI1	circMAGI1	circ18386	-0.0256861	0.922358			1	1	1	1	1	1	1	1	1	1	1	1	0.0555224	0	0.0492879	0.0345869	0.0249604	0.0334009	0.04123	0.0504083	0.0270672	0.0307224	0.0657806	0	0	0	0.0527637	0.0164984	0	0.0204789	0.0408879	0.0859983	0.0457522	0	0	0.0314656	0.0825402	0.0139676	0.0124207
chr3	66263379	66236544	+	SLC25A26	circSLC25A26_1	circ18396	0.300933	0.458014			1	1	1	1	1	1					0	0	0	0	0.0985758	0.011529	0.0249604	0.0501013	0.020615	0.0403266	0	0.0204816	0	0.0240729	0	0.0122966	0.0175879	0.0494953	0	0.0204789	0.020444	0.114664	0.0228761	0.0517955	0	0.0104885	0.192594	0	0
chr3	66263379	66243203	+	SLC25A26	circSLC25A26_2	circ18397	-0.264613	0.130758			1	1	1	1	1	1			1		1	0	0.0416418	0	0	0	0	0.0167004	0.020615	0.0806532	0.0360896	0.0614448	0.0394684	0	0	0.0122966	0.0703516	0.0329968	0	0.0307184	0.020444	0.200663	0	0.0258978	0.0140399	0	0.0275134	0.0279352	0
chr3	71041328	71053773	-	FOXP1	circFOXP1	circ18425	0.104675	0.715859			1	1	1	1	1	1	1	1	1	1	1	1	0	0.0259721	0.0246439	0.0230579	0.0374406	0	0.04123	0.0100817	0.00902241	0	0.0131561	0.0240729	0.019575	0.0245932	0	0	0.0487752	0.0204789	0.0817759	0.200663	0.0228761	0.0517955	0	0	0.0275134	0	0
chr3	107733023	107710452	+	BBX	circBBX	circ16547	-0.0749221	0.871682			1	1	1	1	1	1			1	1	1	1	0	0.0259721	0	0	0	0.0167004	0.020615	0.0100817	0	0.0102408	0.0263123	0.0240729	0.019575	0	0.0351758	0.0329968	0	0	0.020444	0	0.0686283	0.0258978	0.0280798	0.0314656	0	0.0558703	0
chr3	108191521	108214021	-	IFT57	circIFT57	circ16556	0.417357	0.407182			1	1	1	1	1	1					0	0	0	0	0.0246439	0.011529	0.0124802	0	0.020615	0.0100817	0	0.0307224	0.0131561	0	0	0.0245932	0.0175879	0.0494953	0	0.0102395	0.020444	0.0573322	0	0	0.0140399	0	0.0275134	0	0.0124207
chr3	108672656	108647943	+	DZIP3	circDZIP3	circ16567	0.246601	0.25484			1	1	1	1	1	1					0	0	0.0555224	0	0.0739318	0.011529	0.0249604	0.0334009	0.04123	0.0100817	0.0360896	0.0307224	0.0263123	0.0361094	0.2349	0.0122966	0.0351758	0.0494953	0.0487752	0.0204789	0.10222	0.114664	0.0915045	0.0258978	0.0280798	0.0314656	0.0275134	0.097773	0.0248414
chr3	111126335	111112030	+	NECTIN3	circNECTIN3_1	circ16575	-0.170572	0.284561			1	1	1	1	1	1			1	1	1	1	0.0277612	0	0.0739318	0.011529	0.0124802	0	0.020615	0	0.0180448	0.0204816	0.0263123	0.0361094	0.019575	0	0.0175879	0.164984	0.0243876	0.0102395	0.0408879	0.0859983	0	0	0.0280798	0.0209771	0.0550268	0.0419027	0.0248414
chr3	111147484	111112030	+	NECTIN3	circNECTIN3_2	circ16577	-0.231911	0.277385			1	1	1	1	1	1			1	1	1	1	0.0138806	0	0.0492879	0	0.0249604	0	0	0.0100817	0	0.0204816	0.0526245	0	0	0.0122966	0.0175879	0	0.0243876	0	0.0408879	0.0859983	0.0457522	0	0.0280798	0.0209771	0	0	0
chr3	113664313	113674896	-	USF3	circUSF3	circ16602	0.0744344	0.681738			1	1	1	1	1	1					0	0	0	0.0259721	0	0.011529	0.0124802	0.0167004	0	0.030245	0.0270672	0	0	0	0.019575	0	0.0351758	0	0	0.0102395	0	0	0	0	0.0701996	0	0.0550268	0.0139676	0
chr3	114350274	114351878	-	ZBTB20	circZBTB20	circ16619	0.000328764	0.933992			1	1	1	1	1	1			1	1	1	1	0	0	0.0246439	0.011529	0.0374406	0	0	0	0.00902241	0.0102408	0.0131561	0.0120365	0	0.0491865	0	0.0164984	0	0.0307184	0.0613319	0.0859983	0	0.0258978	0.0140399	0.0209771	0.0275134	0	0.0124207
chr3	119517315	119503532	+	TIMMDC1	circTIMMDC1	circ16638	0.476142	0.4365			1	1	1	1	1	1					0	0	0	0.012986	0	0.011529	0	0.0167004	0.12369	0	0.00902241	0.0102408	0	0	0.019575	0	0	0.0494953	0	0	0	0	0	0	0	0.0734198	0.0275134	0.111741	0.0496829
chr3	119863419	119905852	-	GSK3B	circGSK3B	circ16646	0.295504	0.378282			1	1	1	1	1	1					0	0	0.0277612	0	0	0.011529	0.0374406	0.0167004	0.04123	0.030245	0.0180448	0.0307224	0.0263123	0.0240729	0.0587249	0	0	0	0.0243876	0.0204789	0.0408879	0	0.0228761	0	0	0	0.0550268	0	0
chr3	121240507	121152477	+	STXBP5L	circSTXBP5L_1	circ16674	-0.519008	0.156014		down_Mturquoise	1	1	1	1	1	1					0	0	0	0	0	0	0.0374406	0.0167004	0	0.0403266	0.0451121	0.0307224	0.0263123	0	0.019575	0	0	0	0	0	0.0817759	0.0573322	0.0457522	0	0.0280798	0.0104885	0	0.0139676	0
chr3	121318540	121279805	+	STXBP5L	circSTXBP5L_2	circ16689	-0.178174	0.604767			1	1	1	1	1	1			1	1	1	1	0.0138806	0	0	0.0230579	0.0124802	0.0167004	0.020615	0.0100817	0.0180448	0	0	0.0240729	0	0	0.0351758	0.0164984	0	0.0102395	0.0408879	0	0.0457522	0	0	0.0104885	0	0.0419027	0
chr3	121381532	121378716	+	STXBP5L	circSTXBP5L_3	circ16691	-0.255057	0.331453			1	1	1	1	1	1					0	0	0.0277612	0.012986	0.0492879	0.011529	0.0374406	0.0334009	0.020615	0.030245	0.0270672	0.0409632	0.0263123	0.0722188	0.019575	0	0.0351758	0.0164984	0	0	0.122664	0	0.0228761	0.103591	0.0701996	0.0209771	0.0825402	0.0279352	0
chr3	125313308	125331238	-	ZNF148	circZNF148	circ16769	-0.0758719	0.933706			1	1	1	1	1	1			1	1	1	1	0.0555224	0.0389581	0.0246439	0.0230579	0.0124802	0.0835022	0.020615	0.0403266	0.0360896	0.0204816	0.0394684	0.132401	0.11745	0.0245932	0.0527637	0.0494953	0.0975504	0.0204789	0.183996	0.0859983	0.0686283	0.0258978	0.0561596	0.136351	0.110054	0.167611	0.0248414
chr3	129827803	129832826	-	TMCC1	circTMCC1_1	circ16816	0.204365	0.631564			1	1	1	1	1	1	1	1	1	1	1	1	0.0555224	0.0519441	0.0246439	0.0576448	0	0.0167004	0.020615	0.0100817	0.0180448	0.0307224	0.0789368	0.0120365	0.019575	0.0122966	0.0527637	0.0329968	0	0.0102395	0.020444	0.0286661	0.0228761	0	0.0140399	0.0104885	0	0.0139676	0.0248414
chr3	129880309	129880559	-	TMCC1	circTMCC1_2	circ16822	0.666513	0.023406	up	down_Mturquoise	1	1	1	1	1	1					0	0	0	0.012986	0.0246439	0.0230579	0	0.0167004	0	0	0.0360896	0.0102408	0.0394684	0.0120365	0.019575	0.0122966	0.0351758	0.0494953	0	0.0102395	0	0.0286661	0.0686283	0.0258978	0	0.0104885	0	0	0.0124207
chr3	130941699	130930416	+	ATP2C1	circATP2C1	circ16827	0.721858	0.00454412	up		1	1	1	1	1	1			1		1	0	0.0138806	0	0.0492879	0.0461158	0.0499208	0	0.020615	0.030245	0	0.0307224	0.0131561	0.0240729	0	0.0122966	0.0175879	0.0824921	0.0975504	0.0102395	0	0.0286661	0	0.0258978	0.0140399	0.0734198	0.0550268	0	0.0124207
chr3	134188837	134195182	-	RYK	circRYK	circ16886	0.141381	0.465981			1	1	1	1	1	1					0	0	0.0277612	0.012986	0.0985758	0.011529	0	0	0.020615	0.0504083	0.0180448	0.0102408	0	0.0962918	0.0587249	0.0122966	0.0175879	0.0164984	0.0487752	0	0.0408879	0.171997	0	0.0258978	0.0421197	0	0.0825402	0.0698379	0.0124207
chr3	138570318	138572932	-	CEP70	circCEP70	circ16948	0.117116	0.494171			1	1	1	1	1	1					0	0	0	0.0389581	0.0246439	0	0.0748812	0	0.061845	0.0403266	0.00902241	0.051204	0	0	0	0.0368898	0.0703516	0	0	0.0409579	0.0817759	0.114664	0.0915045	0	0.0701996	0.0209771	0.0550268	0.0279352	0
chr3	141540609	141512163	+	RASA2	circRASA2	circ16972	-0.0844963	0.799094		down_Mturquoise	1	1	1	1	1	1			1	1	1	1	0.0138806	0	0.0246439	0.011529	0.0374406	0	0.04123	0.0201633	0.0541345	0.0409632	0.0526245	0	0	0	0.0703516	0	0	0.0307184	0.122664	0.0286661	0.0228761	0	0.0561596	0	0	0	0
chr3	149921227	149846011	+	RNF13	circRNF13	circ17067	0.471392	0.0839605			1	1	1	1	1	1					0	0	0.0277612	0	0.0246439	0.0230579	0.062401	0	0.04123	0.0201633	0.0270672	0.0204816	0.0657806	0.0842553	0.0587249	0	0.0175879	0.230978	0	0.0204789	0.0817759	0.143331	0	0	0	0	0	0.139676	0.0372622
chr3	151127984	151116338	+	MED12L	circMED12L	circ17079	0.0592384	0.879587			1	1	1	1	1	1	1	1	1	1	1	1	0	0	0.0246439	0.011529	0.0374406	0.0668018	0	0	0.0451121	0.0102408	0.0263123	0.0481459	0.0587249	0.0245932	0.0527637	0.0989905	0.0487752	0.0102395	0.10222	0.114664	0.114381	0.0517955	0.0280798	0.0209771	0	0.0838055	0.0372622
chr3	154240579	154217869	+	ARHGEF26	circARHGEF26	circ17102	0.382956	0.124345		down_Mturquoise	1	1	1	1	1	1					0	0	0.0416418	0	0	0.0345869	0	0.0167004	0	0.0201633	0.00902241	0	0	0.0120365	0.03915	0	0.0175879	0.0494953	0	0.0102395	0.10222	0.0286661	0.0228761	0.0517955	0.0140399	0.0314656	0.0275134	0.0139676	0
chr3	155911279	155893518	+	GMPS	circGMPS	circ17131	-0.477967	0.123622		down_Mviolet	1	1	1	1	1	1					0	0	0	0	0	0	0.0124802	0	0.020615	0.0201633	0.0180448	0.0102408	0	0.0120365	0	0.0122966	0	0.0329968	0	0	0.020444	0.0286661	0	0	0.0280798	0.0104885	0	0	0.0124207
chr3	158123991	158122103	+	RSRC1	circRSRC1	circ17157	-0.0834601	0.894611			1	1	1	1	1	1	1	1	1	1	1	1	0.0555224	0.012986	0.0492879	0.0345869	0.0249604	0.0334009	0.04123	0.030245	0.00902241	0.0409632	0.0657806	0.0481459	0.03915	0.0368898	0.123115	0.0494953	0.121938	0.0204789	0.224884	0.143331	0.228761	0.129489	0.0280798	0.0209771	0.0825402	0.097773	0
chr3	169988359	169976946	+	SEC62	circSEC62	circ17209	-0.439181	0.313058		down_Mturquoise	1	1	1	1	1	1					0	0	0.0138806	0	0.0246439	0.011529	0.0124802	0	0	0.0100817	0.0360896	0.0307224	0.0394684	0.0120365	0.03915	0	0.0351758	0.0164984	0	0	0.0408879	0	0.0457522	0	0.0280798	0.0104885	0	0	0
chr3	170136419	170149244	-	PHC3	circPHC3	circ17223	-0.0426596	0.88968			1	1	1	1	1	1			1		1	0	0.0138806	0.012986	0.0246439	0.0230579	0.0249604	0	0.04123	0.0403266	0.0270672	0.0102408	0.0394684	0.0481459	0	0	0	0.0329968	0.0243876	0	0.10222	0	0.0457522	0.0517955	0.0140399	0	0.0825402	0.0558703	0
chr3	170361429	170359699	+	SKIL	circSKIL	circ17231	-0.536059	0.0285663	down	down_Mviolet	1	0	1	1	1	1			1		1	0	0.0416418	0.012986	0	0.011529	0.0124802	0	0	0.0100817	0.00902241	0.0102408	0.0394684	0.0240729	0	0.0122966	0.0351758	0	0	0.0102395	0.0408879	0	0	0	0.0280798	0.0104885	0.0275134	0.0139676	0.0372622
chr3	171188702	171194635	-	TNIK	circTNIK	circ17250	0.200735	0.306679			1	1	1	1	1	1			1	1	1	1	0.0138806	0.0519441	0.0739318	0.0461158	0.0124802	0.0167004	0.020615	0.0705716	0.00902241	0.0204816	0.0263123	0.0601824	0.019575	0.0122966	0.0175879	0.0494953	0.0243876	0.0409579	0.122664	0.114664	0.0457522	0	0.0280798	0.0104885	0.0550268	0	0.0248414
chr3	172251541	172247533	+	FNDC3B	circFNDC3B	circ17267	-0.415028	0.255506		down_Mturquoise	1	1	1	1	1	1			1	1	1	1	0.0138806	0.0259721	0.0246439	0.0230579	0.0374406	0.0167004	0.020615	0.0100817	0.0451121	0	0.0657806	0.0240729	0.0587249	0.0122966	0	0.0164984	0	0.0204789	0.0817759	0.0573322	0.0457522	0	0.0140399	0.0104885	0.0275134	0.0698379	0.0124207
chr3	172645623	172648114	-	NCEH1	circNCEH1	circ17279	0.00245365	0.66099			1	1	1	1	1	1			1	1	1	1	0.0277612	0	0	0.0230579	0.0873614	0.0334009	0.0824599	0.0504083	0.0451121	0.0307224	0.0394684	0.0722188	0.03915	0.0368898	0	0	0.0487752	0.0716763	0.122664	0.0859983	0.0228761	0	0.0140399	0.0209771	0.110054	0	0.0124207
chr3	179859062	179880123	-	PEX5L	circPEX5L	circ17334	0.22992	0.596368			1	1	1	1	1	1			1	1	1	1	0.0277612	0	0	0.0461158	0.0499208	0.0501013	0.04123	0	0.0270672	0.0307224	0.0131561	0.0361094	0.03915	0.0122966	0.0351758	0.0659937	0	0.0102395	0.020444	0.0286661	0.0228761	0	0.0140399	0.0419542	0.0550268	0.0419027	0.0248414
chr3	183205876	183207823	-	MCF2L2	circMCF2L2_1	circ17386	0.427446	0.0741294			1	1	1	1	1	1					0	0	0.0277612	0.012986	0	0.011529	0.0124802	0.0334009	0.020615	0	0.0270672	0.0102408	0.0657806	0.0120365	0.019575	0.0245932	0	0.0329968	0.0487752	0.0102395	0.0613319	0.0286661	0.0457522	0.0258978	0.0701996	0.0104885	0.0825402	0.0279352	0
chr3	183338800	183389779	-	MCF2L2	circMCF2L2_2	circ17401	-0.294587	0.379157			1	1	1	1	1	1					0	0	0.0138806	0	0	0	0.0124802	0	0	0.0100817	0	0.0102408	0.0131561	0.0240729	0.03915	0	0	0.0164984	0	0	0	0.0286661	0	0.0258978	0.0561596	0.0419542	0	0.0139676	0.0124207
chr3	183379297	183389779	-	MCF2L2	circMCF2L2_3	circ17403	0.587468	0.000421669	up		1	1	1	1	1	1					0	0	0.0138806	0.0259721	0	0.0345869	0.0374406	0	0.0824599	0.0504083	0.0360896	0.0307224	0.0657806	0.144438	0.1566	0.0245932	0.0351758	0.0329968	0.0487752	0.0204789	0.0408879	0.114664	0.0457522	0.0776933	0.0842395	0.0314656	0.0550268	0.0558703	0.0372622
chr3	183651276	183643480	+	KLHL24	circKLHL24_1	circ17405	-0.545502	0.249829		down_Mturquoise	1	1	1	1	1	1			1	1	1	1	0.0694031	0	0.0739318	0	0.224644	0.0167004	0.267995	0	0.135336	0	0	0	0.0587249	0	0.0879395	0.0164984	0	0.0307184	0	0	0.160133	0.0517955	0	0	0.137567	0.0279352	0
chr3	183651276	183650296	+	KLHL24	circKLHL24_2	circ17406	-0.697944	0.0216615	down	down_Mturquoise	1	1	1	1	1	1	1	1	1	1	1	1	0.0277612	0	0	0	0.062401	0	0.020615	0.0403266	0.0180448	0.0102408	0.0394684	0.0120365	0	0.0122966	0.0175879	0.0164984	0	0.0102395	0.10222	0.0859983	0	0	0.0421197	0.0209771	0	0.0139676	0
chr3	183665039	183643480	+	KLHL24	circKLHL24_3	circ17409	-0.296213	0.590472		down_Mturquoise	1	1	1	1	1	1					0	0	0	0	0	0.011529	0.062401	0	0.04123	0.030245	0	0.0204816	0.0263123	0.0240729	0	0.0122966	0.0703516	0.0164984	0	0.0204789	0.143108	0	0	0	0.0140399	0	0	0	0
chr3	183672484	183643480	+	KLHL24	circKLHL24_4	circ17411	-0.929892	0.0201339	down	down_Mturquoise	1	1	1	1	1	1			1	1	1	1	0.194329	0.0519441	0.172508	0.011529	0.424327	0	0	0.282286	0	0.184334	0	0	0.11745	0.0737797	0	0.0329968	0.0243876	0.225268	0	0.114664	0	0	0.336958	0.0839083	0	0	0
chr3	183672484	183650296	+	KLHL24	circKLHL24_5	circ17412	-0.649556	0.0725741		down_Mturquoise	1	1	1	1	1	1			1		1	0	0.0277612	0	0.12322	0	0.0873614	0.100203	0.103075	0.0907349	0.0541345	0.0614448	0.0657806	0.0481459	0	0.0122966	0.0879395	0	0.0487752	0	0.347547	0.0286661	0.0915045	0.103591	0.0701996	0.0209771	0.0275134	0.0558703	0.0248414
chr3	195381009	195392147	-	ACAP2	circACAP2	circ17554	0.497942	0.0450464			1	1	1	1	1	1	1	1	1	1	1	1	0.0277612	0	0	0.011529	0.0249604	0	0.0824599	0.0100817	0.0270672	0.0716856	0.0789368	0.0361094	0.03915	0.0122966	0.0527637	0.0164984	0.0731628	0.0204789	0.020444	0.0286661	0	0	0.0561596	0.0209771	0	0.0698379	0.0124207
chr3	196391813	196403019	-	UBXN7	circUBXN7	circ17574	0.3684	0.0866238		up_Mdarkred	1	1	1	1	1	1					0	0	0.0277612	0	0	0.0691737	0.0124802	0.0334009	0.103075	0	0.0541345	0.0307224	0.105249	0	0.0782999	0.0245932	0.0351758	0.0494953	0.195101	0.0409579	0	0.114664	0.0457522	0.0258978	0.0701996	0.0734198	0.0550268	0.0698379	0
chr3	197081051	197119530	-	DLG1	circDLG1_1	circ17606	-0.615222	0.0170123	down		1	1	1	1	1	1					0	0	0	0.012986	0	0.0345869	0.0124802	0	0	0.0201633	0	0	0	0.0481459	0	0.0122966	0.0703516	0	0	0.0204789	0	0.114664	0	0.0258978	0	0	0.0275134	0	0.0248414
chr3	197104903	197119530	-	DLG1	circDLG1_2	circ17615	-0.287473	0.29634		down_Mturquoise	1	1	1	1	1	1			1		1	0	0.0138806	0.012986	0.0739318	0.011529	0.0249604	0	0.020615	0.0201633	0.0270672	0.0204816	0.0131561	0.0240729	0	0.0245932	0.0175879	0.0329968	0.0243876	0.0204789	0.0408879	0.0286661	0.137257	0.0258978	0.0140399	0.0104885	0	0.0139676	0
chr4	1225360	1241519	-	CTBP1	circCTBP1	circ18730	-0.242245	0.415912			1	1	1	1	1	1	1		1		1	0	0	0.012986	0	0.0576448	0	0.0167004	0	0	0.00902241	0.0102408	0.0394684	0	0	0	0	0	0.0243876	0.0307184	0	0.0286661	0	0	0.0280798	0	0	0.0139676	0.0124207
chr4	1935262	1900626	+	NSD2	circWHSC1	circ19205	0.13409	0.303027			1	1	1	1	1	1	1	1	1	1	1	1	0.0138806	0.0259721	0.0739318	0.011529	0.0374406	0.0334009	0	0.0201633	0.00902241	0.0409632	0.0394684	0	0.019575	0.0122966	0.0175879	0	0.0243876	0.0204789	0.0613319	0	0.0228761	0	0.0561596	0.0629312	0.0825402	0.0419027	0.0248414
chr4	3029409	2984513	+	GRK4	circGRK4	circ19323	-0.542059	0.0411794	down	down_Mturquoise	1	1	1	1	1	1					0	0	0.0138806	0.0259721	0.0492879	0	0.0374406	0	0.020615	0.0201633	0.0270672	0.051204	0.0263123	0.0240729	0	0.0122966	0.0703516	0.0164984	0	0	0.0408879	0.0573322	0	0.0258978	0.0280798	0.0209771	0.0825402	0	0.0124207
chr4	3107423	3086939	+	HTT	circHTT	circ19332	-0.236446	0.537919		down_Mturquoise	1	1	1	1	1	1			1	1	1	1	0	0.116874	0.12322	0.0461158	0.224644	0.0835022	0.267995	0.211715	0.396986	0.245779	0.342059	0.228693	0	0.0737797	0.228643	0	0	0.112634	0.776871	0.315327	0.41177	0.155387	0.154439	0.115374	0.137567	0.209514	0.0248414
chr4	15625252	15644708	-	FBXL5	circFBXL5	circ19013	-0.23862	0.490201			1	1	1	1	1	1	1	1	1	1	1	1	0.0138806	0	0	0.011529	0.0124802	0	0.020615	0.0806532	0.0360896	0	0.105249	0.0481459	0	0	0	0.0164984	0	0	0.10222	0.0286661	0.0228761	0	0.0701996	0.0419542	0	0.0419027	0
chr4	20713539	20704466	+	PACRGL	circPACRGL	circ19215	-0.192942	0.231822		down_Mturquoise	1	1	1	1	1	1			1		1	0	0.0555224	0.0259721	0.0739318	0	0.062401	0.0167004	0.0824599	0.030245	0.0631569	0.0614448	0.131561	0	0.03915	0	0.0175879	0.0329968	0.0487752	0.0511973	0.143108	0.257995	0.114381	0.0517955	0.0701996	0.0209771	0.137567	0.0419027	0.0248414
chr4	30950215	30920153	+	PCDH7	circPCDH7	circ19330	0.201275	0.671937			1	1	1	1	1	1	1	1	1	1	1	1	0.0138806	0.0389581	0	0.011529	0	0	0.020615	0	0.00902241	0	0.0131561	0.0120365	0	0.0245932	0.0175879	0.0329968	0	0.0204789	0	0	0	0	0.0140399	0.0104885	0.0275134	0	0.0124207
chr4	37631385	37638504	-	RELL1	circRELL1	circ19368	0.00207197	0.84174			1	1	1	1	1	1					0	0	0	0	0.0492879	0	0.0124802	0.0167004	0.04123	0.030245	0.00902241	0.051204	0.0131561	0.0240729	0	0	0.0527637	0	0.0243876	0.0204789	0.020444	0.0573322	0.0457522	0.0258978	0.0140399	0.0104885	0	0	0
chr4	38103157	38089932	+	TBC1D1	circTBC1D1	circ19375	-0.0851432	0.822001		down_Mturquoise	1	1	1	1	1	1			1		1	0	0	0	0.0492879	0.0230579	0.0249604	0	0.04123	0.0201633	0.0360896	0	0.0131561	0.0240729	0	0.0245932	0.0175879	0	0	0.0102395	0	0	0	0	0.0421197	0.0104885	0.0275134	0.0419027	0
chr4	39326563	39327756	-	RFC1	circRFC1	circ19392	-0.313098	0.407823		down_Mturquoise	1	1	1	1	1	1			1	1	1	1	0.0277612	0.0389581	0	0	0.0249604	0	0	0.0403266	0.0270672	0.0204816	0.0526245	0.0481459	0.0782999	0.0122966	0	0.0494953	0	0	0.0613319	0.0286661	0.0228761	0.0258978	0.0561596	0.0209771	0.0825402	0.0558703	0
chr4	39774933	39737420	+	UBE2K	circUBE2K	circ19394	0.0112373	0.909475			1	1	1	1	1	1					0	0	0.0416418	0.0519441	0.0492879	0.0345869	0.062401	0.0501013	0.12369	0.0604899	0.0360896	0.0204816	0.118405	0.0962918	0.0587249	0.0245932	0.0175879	0.164984	0.0731628	0.0409579	0.122664	0.143331	0.0457522	0.103591	0	0.0419542	0.0275134	0.139676	0.0248414
chr4	40890364	40945070	-	APBB2	circAPBB2_1	circ19424	0.218809	0.601503		up_Mdarkred	1	1	1	1	1	1	1	1	1	1	1	1	0.0138806	0.012986	0.0246439	0	0	0.0167004	0.061845	0.0100817	0.00902241	0.0204816	0.0131561	0.0120365	0	0	0	0	0	0.0102395	0.020444	0.0573322	0	0	0.0280798	0.0104885	0	0.0139676	0.0124207
chr4	40890364	40945073	-	APBB2	circAPBB2_2	circ19425	0.218809	0.601503		up_Mdarkred	1	1	1	1	1	1			1		1	0	0.0138806	0.012986	0.0246439	0	0	0.0167004	0.061845	0.0100817	0.00902241	0.0204816	0.0131561	0.0120365	0	0	0	0	0	0.0102395	0.020444	0.0573322	0	0	0.0280798	0.0104885	0	0.0139676	0.0124207
chr4	40934456	40945070	-	APBB2	circAPBB2_3	circ19427	0.458404	0.161346		up_Mdarkred	1	1	1	1	1	1	1	1	1	1	1	1	0	0	0	0	0	0.0167004	0	0	0.00902241	0	0.0131561	0.0361094	0.019575	0	0	0	0	0	0.020444	0.0573322	0.0228761	0	0.0140399	0	0	0.0139676	0.0124207
chr4	40934456	40945073	-	APBB2	circAPBB2_4	circ19428	0.458404	0.161346		up_Mdarkred	1	1	1	1	1	1			1		1	0	0	0	0	0	0	0.0167004	0	0	0.00902241	0	0.0131561	0.0361094	0.019575	0	0	0	0	0	0.020444	0.0573322	0.0228761	0	0.0140399	0	0	0.0139676	0.0124207
chr4	48383784	48369849	+	SLAIN2	circSLAIN2	circ19525	-0.27365	0.484118			1	1	1	1	1	1	1	1	1	1	1	1	0.0416418	0.0259721	0	0	0	0.0167004	0.061845	0.0403266	0.0270672	0.0102408	0.0263123	0.0120365	0.019575	0	0.0703516	0.0329968	0	0.0409579	0.122664	0.0573322	0.114381	0.0258978	0.0140399	0.0314656	0	0	0.0124207
chr4	51891851	51863437	+	DCUN1D4	circDCUN1D4	circ19548	-0.331531	0.19665			1	1	1	1	1	1	1	1	1	1	1	1	0.0138806	0.0519441	0	0.0576448	0.0374406	0.0501013	0.04123	0.0403266	0.0812017	0.0102408	0	0	0.03915	0.0245932	0.140703	0.0989905	0.0243876	0.0204789	0	0.0573322	0.160133	0	0.0140399	0.0839083	0	0.111741	0.0372622
chr4	53453133	53383773	+	FIP1L1	circFIP1L1	circ19575	-0.197627	0.732576		down_Mturquoise	1	1	1	1	1	1					0	0	0.0138806	0.0259721	0.0246439	0	0.0124802	0	0	0.030245	0.0360896	0.0102408	0	0.0601824	0.019575	0.0122966	0.0351758	0	0	0.0204789	0	0	0	0.0517955	0.0421197	0	0.0825402	0.0279352	0.0124207
chr4	55417985	55411614	+	TMEM165	circTMEM165	circ19586	0.0910314	0.738596			1	1	1	1	1	1					0	0	0.0138806	0.0389581	0.0246439	0.0345869	0.0499208	0.0835022	0.0824599	0.0100817	0.0360896	0.051204	0.0263123	0.156474	0.0978749	0.0368898	0.0703516	0.0329968	0.0487752	0.0102395	0.0408879	0.171997	0.0915045	0.0517955	0.0140399	0.0209771	0.137567	0.181579	0.0124207
chr4	55453054	55456300	-	CLOCK	circCLOCK	circ19590	-0.186701	0.745627		down_Mturquoise	1	1	1	1	1	1					0	0	0	0	0.0985758	0	0	0	0.04123	0.0201633	0	0.0307224	0	0	0.03915	0	0.0527637	0	0	0	0.020444	0.0286661	0.0228761	0	0	0	0	0.0139676	0
chr4	61948276	61909560	+	ADGRL3	circADGRL3_1	circ19626	0.200761	0.305645		down_Mturquoise	1	1	1	1	1	1			1		1	0	0	0	0.0246439	0.0230579	0.062401	0	0	0.0504083	0.0360896	0.0409632	0.0657806	0	0	0.0368898	0.0703516	0.0824921	0	0.0102395	0.0613319	0.0573322	0	0.0258978	0.0421197	0.0314656	0.0275134	0.0279352	0.0124207
chr4	61948276	61934840	+	ADGRL3	circADGRL3_2	circ19627	0.076394	0.788936			1	1	1	1	1	1	1	1	1	1	1	1	0	0.012986	0.0492879	0.011529	0	0.0167004	0.04123	0.030245	0	0	0	0.0240729	0	0	0	0.0329968	0.0243876	0.0102395	0.0408879	0.0286661	0.0228761	0	0.0140399	0.0209771	0.0275134	0	0.0248414
chr4	61998265	61934840	+	ADGRL3	circADGRL3_3	circ19637	0.0022693	0.708674			1	1	1	1	1	1	1	1	1	1	1	1	0.0277612	0	0	0.011529	0.0124802	0	0.04123	0	0.0360896	0.0307224	0.0263123	0.0361094	0	0	0.0527637	0.0329968	0.0243876	0.0409579	0.0408879	0.114664	0.0686283	0.0258978	0.0421197	0	0.0550268	0	0
chr4	62044549	61934840	+	ADGRL3	circADGRL3_4	circ19647	-0.324301	0.411283		down_Mturquoise	1	0	1	1	1	1	1	1	1	1	1	1	0.0138806	0	0	0	0	0	0.020615	0	0.0180448	0	0	0.0120365	0	0	0.0527637	0	0	0	0.0408879	0	0	0	0	0	0	0	0
chr4	73118688	73125312	-	ANKRD17	circANKRD17	circ19720	-0.287395	0.131441			1	1	1	1	1	1					0	0	0.0138806	0.0389581	0.0739318	0.0230579	0	0.0334009	0.04123	0.0604899	0.0360896	0.0307224	0	0.0601824	0.019575	0.0122966	0.0175879	0	0.0975504	0.0204789	0	0.0573322	0	0	0.0842395	0.0524427	0.0550268	0.0279352	0.0372622
chr4	77030970	76996425	+	2019-09-11	circSEPT11	circ19757	0.0660498	0.757236			1	1	1	1	1	1			1		1	0	0.0277612	0.0259721	0.0246439	0	0	0.0167004	0	0.0201633	0.0360896	0.0307224	0.0263123	0.0240729	0.019575	0.0122966	0	0.0329968	0	0.0102395	0.0613319	0.0573322	0	0.0776933	0.0140399	0.0209771	0.0550268	0.0139676	0.0372622
chr4	86701801	86693587	+	PTPN13	circPTPN13	circ19853	0.648549	0.147291			1	1	1	1	1	1	1	1	1	1	1	1	0.0138806	0.0259721	0.0246439	0.011529	0	0.0501013	0	0	0.00902241	0	0	0.0120365	0	0	0.0175879	0.0164984	0	0.0204789	0	0	0	0	0	0.0104885	0.0550268	0.0419027	0.0124207
chr4	87047594	87046166	+	AFF1	circAFF1	circ19865	0.292926	0.524182			1	1	1	1	1	1	1	1	1	1	1	1	0.0138806	0.0259721	0	0	0	0.116903	0	0	0.00902241	0	0.0131561	0.0120365	0	0	0.0175879	0	0.0487752	0	0.020444	0.0573322	0	0	0.0140399	0.0524427	0.0275134	0.0279352	0
chr4	87195324	87195690	-	KLHL8	circKLHL8	circ19874	0.307789	0.308927			1	1	1	1	1	1					0	0	0.0138806	0.0259721	0.0492879	0.011529	0.0249604	0.0668018	0	0.0100817	0.0270672	0.0307224	0.0131561	0.0601824	0	0	0.0175879	0.0659937	0.0731628	0.0307184	0.122664	0.171997	0.0228761	0.0517955	0.0421197	0.0314656	0.0825402	0.0419027	0.0745243
chr4	90313047	90308244	+	CCSER1	circCCSER1	circ19912	-0.172068	0.811541			1	1	1	1	1	1	1	1	1	1	1	1	0.0138806	0.0259721	0.0739318	0.011529	0	0	0.020615	0.0504083	0.00902241	0.0102408	0.105249	0.0240729	0.0587249	0	0.0351758	0.0494953	0.0243876	0.0204789	0.020444	0.0286661	0.0686283	0	0.0280798	0	0.0275134	0	0
chr4	102722871	102726683	-	MANBA	circMANBA	circ18558	0.0858888	0.758236			1	1	1	1	1	1					0	0	0	0	0	0.0345869	0.0249604	0	0	0	0	0.0102408	0.0131561	0.0361094	0.0782999	0.0122966	0	0.0164984	0.0243876	0	0.0408879	0.0573322	0	0.0258978	0	0.0209771	0	0.0838055	0.0124207
chr4	106171095	106212835	-	TBCK	circTBCK	circ18587	-0.0345391	0.671507			1	1	1	1	1	1			1	1	1	1	0.0138806	0.0259721	0.0985758	0.011529	0	0	0.020615	0.0403266	0.0180448	0	0.0394684	0.0361094	0.019575	0.0491865	0.0175879	0.0164984	0	0.0307184	0.0613319	0.0859983	0.0228761	0.0258978	0.0140399	0.0104885	0.0275134	0	0
chr4	107682015	107701285	-	PAPSS1	circPAPSS1	circ18605	0.0369715	0.636194		down_Mturquoise	1	1	1	1	1	1			1	1	1	1	0	0	0	0.0230579	0.0374406	0	0.04123	0	0.0541345	0.0409632	0.0394684	0.0361094	0.03915	0.0245932	0.0351758	0.0164984	0.0487752	0.0204789	0.0613319	0.0859983	0.0457522	0.0517955	0	0	0.0550268	0	0.0248414
chr4	107947537	107944970	+	CYP2U1	circCYP2U1	circ18608	-0.629682	0.0232642	down	down_Mturquoise	1	0	1	1	1	1					0	0	0.0277612	0	0	0	0	0	0	0.0201633	0.00902241	0	0	0	0.019575	0	0	0	0	0.0102395	0.0408879	0.0859983	0.0686283	0	0	0.0104885	0.0550268	0	0
chr4	118114960	118053756	+	NDST3	circNDST3_1	circ18682	-0.162099	0.669598			1	1	1	1	1	1			1	1	1	1	0	0.0259721	0.0246439	0	0.0249604	0	0.020615	0.0201633	0.00902241	0	0.0657806	0.0120365	0.019575	0	0	0	0	0.0102395	0.0408879	0	0	0	0	0.0314656	0	0.0279352	0.0248414
chr4	118143684	118105018	+	NDST3	circNDST3_2	circ18685	-0.615185	0.0528621		down_Mturquoise	1	1	1	1	1	1			1	1	1	1	0	0.012986	0.0739318	0	0.0499208	0	0.04123	0.0201633	0.0360896	0	0	0.0361094	0.019575	0.0122966	0.105527	0.0164984	0	0.0102395	0.122664	0.0286661	0.0686283	0	0.0561596	0.0104885	0.0550268	0.0419027	0
chr4	128077962	128074460	+	LARP1B	circLARP1B	circ18763	-0.133485	0.545876		down_Mturquoise	1	1	1	1	1	1			1	1	1	1	0	0	0	0.011529	0.0249604	0	0	0	0	0	0.0131561	0.0120365	0.019575	0.0122966	0.0175879	0.0164984	0	0.0307184	0.0408879	0.0286661	0.0457522	0	0.0421197	0	0.0275134	0.0419027	0.0124207
chr4	128936655	128959777	-	SCLT1	circSCLT1_1	circ18795	-0.566786	0.0412858	down	down_Mturquoise	1	1	1	1	1	1					0	0	0	0	0	0.011529	0.0124802	0	0.020615	0	0.0180448	0.0204816	0.0526245	0	0.019575	0.0122966	0	0	0	0.0102395	0.10222	0	0.0686283	0.0517955	0.0140399	0.0104885	0.0825402	0.0139676	0
chr4	128936655	129003876	-	SCLT1	circSCLT1_2	circ18798	0.0333547	0.880653			1	1	1	1	1	1					0	0	0.0277612	0	0	0.0230579	0.0249604	0.0167004	0	0.0100817	0	0.0102408	0.0263123	0	0	0	0	0	0.0243876	0.0204789	0.020444	0	0	0	0.0421197	0.0209771	0	0	0.0124207
chr4	128992167	129003876	-	SCLT1	circSCLT1_3	circ18804	0.068826	0.891198			1	1	1	1	1	1	1		1		1	0	0.0971643	0.0779162	0	0.0922316	0.062401	0.0167004	0.061845	0.0403266	0.0451121	0	0.0920929	0.120365	0.137025	0.0122966	0.105527	0.21448	0.0975504	0.133113	0.020444	0.229329	0	0	0.0842395	0	0.0550268	0.0838055	0.0248414
chr4	139125164	139139497	-	ELF2	circELF2	circ18820	0.0799959	0.631916			1	1	1	1	1	1	1	1			1	1	0.0138806	0.0259721	0.0246439	0.0230579	0.0249604	0.0668018	0	0.0100817	0.0270672	0.0409632	0.0394684	0	0	0.0122966	0.0703516	0	0	0.0102395	0.122664	0.0286661	0.0228761	0.0517955	0.0561596	0.0314656	0	0.0139676	0
chr4	143543972	143543509	+	SMARCA5	circSMARCA5	circ18861	-0.100355	0.47			1	1	1	1	1	1					0	0	0.694031	0.19479	1.08433	0.276695	0.586569	0.167004	0.680294	0.574654	0.757882	0.573485	0.934085	0.770334	0.35235	0.270526	1.09045	0.676435	0.438977	0.501734	2.02395	1.80597	2.37912	0.517955	0.800275	0.545404	1.34816	0.628541	0.198732
chr4	145845956	145849561	-	ZNF827	circZNF827	circ18873	0.177595	0.841987			1	1	1	1	1	1			1	1	1	1	0.0138806	0.0389581	0.0246439	0.0461158	0	0.0167004	0	0.0100817	0	0.0204816	0.0657806	0.0361094	0.019575	0	0.0351758	0.0659937	0	0.0307184	0	0.114664	0.0457522	0	0.0701996	0	0.0550268	0.111741	0.0248414
chr4	147881932	147857553	+	ARHGAP10	circARHGAP10_1	circ18893	-0.01993	0.667864		down_Mturquoise	1	1	1	1	1	1			1	1	1	1	0.0138806	0	0.0246439	0	0	0	0	0.030245	0	0.051204	0.0263123	0	0	0.0491865	0.0175879	0.0824921	0.0243876	0.0409579	0.122664	0.0286661	0.0915045	0	0.0421197	0	0.0550268	0.0139676	0.0248414
chr4	147955374	147939825	+	ARHGAP10	circARHGAP10_2	circ18914	0.50201	0.339504			1	1	1	1	1	1			1	1	1	1	0.194329	0.0389581	0.0739318	0.0345869	0	0	0.12369	0.030245	0.0451121	0.174094	0.0263123	0.0361094	0.019575	0.184449	0.140703	0.0659937	0.0243876	0.307184	0.183996	0.0859983	0.114381	0	0.112319	0.0314656	0.0550268	0	0.0496829
chr4	150102812	150102478	+	DCLK2	circDCLK2_1	circ18935	-0.0217206	0.92713			1	1	1	1	1	1			1		1	0	0	0	0	0.011529	0	0	0	0	0.00902241	0	0.0526245	0	0.03915	0.0122966	0	0.0659937	0.0487752	0	0.0408879	0	0	0.0258978	0.0140399	0.0419542	0	0.0139676	0.0124207
chr4	150239875	150203795	+	DCLK2	circDCLK2_2	circ18942	-0.374012	0.320592			1	1	1	1	1	1					0	0	0	0.0779162	0.0246439	0	0.0249604	0	0	0.0100817	0.00902241	0.0204816	0.0394684	0.0120365	0.03915	0	0	0	0	0.0102395	0.0408879	0.0286661	0	0	0	0	0.0550268	0.0139676	0
chr4	150798081	150817257	-	LRBA	circLRBA	circ18968	-0.425343	0.199158		down_Mturquoise	1	1	1	1	1	1					0	0	0	0	0.0985758	0.011529	0.0124802	0	0	0.0504083	0.00902241	0	0.0131561	0	0	0	0	0.0329968	0	0.0409579	0	0.0859983	0.0228761	0.103591	0	0.0104885	0	0.0139676	0
chr4	152411303	152412529	-	FBXW7	circFBXW7	circ18988	-0.031513	0.611466			1	1	1	1	1	1					0	0	0.541344	0.350623	0.616098	0.368927	0.312005	0.317309	0.53599	0.312531	0.406008	0.583726	0	0.577751	0.450225	0.233636	0.545225	0.52795	0.682853	0.3891	0.960866	1.17531	0.503274	0.414364	0.533517	0.262213	0.797888	0.446962	0.273256
chr4	153276130	153270335	+	TRIM2	circTRIM2_1	circ18992	0.0514807	0.942807			1	1	1	1	1	1					0	0	0.0277612	0.012986	0.0492879	0.0345869	0.0249604	0	0.061845	0.0100817	0.00902241	0.0102408	0.0263123	0.0120365	0.019575	0.0245932	0.0175879	0.0164984	0	0.0102395	0.020444	0.0286661	0.0686283	0	0.0140399	0.0209771	0.0275134	0.0279352	0.0124207
chr4	153276130	153270338	+	TRIM2	circTRIM2_2	circ18993	0.0514807	0.942807			1	1	1	1	1	1			1	1	1	1	0.0277612	0.012986	0.0492879	0.0345869	0.0249604	0	0.061845	0.0100817	0.00902241	0.0102408	0.0263123	0.0120365	0.019575	0.0245932	0.0175879	0.0164984	0	0.0102395	0.020444	0.0286661	0.0686283	0	0.0140399	0.0209771	0.0275134	0.0279352	0.0124207
chr4	176151967	176149807	+	WDR17	circWDR17	circ19134	0.0315831	0.710529			1	1	1	1	1	1					0	0	0.0138806	0	0	0.0230579	0.0124802	0.0167004	0	0	0	0	0.0263123	0.0120365	0	0	0	0.0329968	0.0487752	0	0	0.0286661	0.0228761	0	0.0140399	0.0209771	0.0275134	0.0419027	0
chr4	186706563	186709845	-	FAT1	circFAT1	circ19195	-0.259528	0.321502			1	1	1	1	1	1					0	0	0.0138806	0.012986	0	0	0.0499208	0.0167004	0.020615	0.0100817	0.0270672	0.0307224	0.0920929	0.0120365	0	0.0368898	0.0351758	0.0494953	0	0.0716763	0.0613319	0.0573322	0.0686283	0	0	0.0314656	0.0550268	0.0139676	0.0248414
chr5	10417404	10415488	+	2019-03-06	circMARCH6	circ19960	-0.158015	0.430721			1	1	1	1	1	1					0	0	0.416418	0.116874	0.418947	0.11529	0.336965	0.100203	0.515375	0.36294	0.406008	0.327706	0.342059	0.361094	0.215325	0.159856	0.422109	0.0989905	0.0731628	0.266226	0.797315	0.401326	0.366018	0.155387	0.365038	0.220259	0.357674	0.237449	0.0993658
chr5	11082696	11098748	-	CTNND2	circCTNND2	circ20059	0.210645	0.359756			1	1	1	1	1	1			1	1	1	1	0.0555224	0.012986	0	0	0.0374406	0	0	0	0.0270672	0	0.0657806	0.0240729	0.019575	0.0122966	0	0	0	0.0102395	0.0408879	0.0286661	0.0457522	0.0258978	0	0	0	0	0.0124207
chr5	14741827	14758598	-	ANKH	circANKH	circ20470	-0.0944813	0.72308		down_Mturquoise	1	1	1	1	1	1			1	1	1	1	0	0.0259721	0	0.011529	0.0124802	0.0167004	0	0.0403266	0.00902241	0.0102408	0.0131561	0.0361094	0.019575	0.0245932	0.0351758	0.0329968	0	0.0102395	0.020444	0.0286661	0	0	0.0140399	0.0419542	0	0.0698379	0
chr5	36211844	36227565	-	NADK2	circNADK2	circ20763	0.119816	0.561408		down_Mturquoise	1	1	1	1	1	1					0	0	0.0694031	0	0	0.0461158	0.062401	0.0167004	0	0.0504083	0.0270672	0.051204	0.0394684	0.0842553	0.03915	0.0122966	0.0351758	0.0659937	0	0.0307184	0.10222	0.143331	0	0	0.0421197	0.0524427	0.0550268	0.0698379	0
chr5	36976402	36953618	+	NIPBL	circNIPBL	circ20768	-0.12575	0.68619			1	1	1	1	1	1			1	1	1	1	0.0416418	0.0389581	0.0739318	0.0230579	0	0.0501013	0.04123	0.0201633	0.0541345	0.0204816	0.0526245	0.0481459	0.019575	0.0491865	0.0175879	0.0824921	0.0731628	0.0307184	0.122664	0	0	0	0.0982794	0.0734198	0	0.0558703	0.0248414
chr5	38523419	38530666	-	LIFR	circLIFR	circ20830	0.201587	0.266615			1	1	1	1	1	1			1		1	0	0.0138806	0.0909022	0.0492879	0.0691737	0.0124802	0.0167004	0	0.0604899	0.0360896	0.0614448	0.0263123	0.0962918	0	0	0.0351758	0.148486	0.0487752	0.0102395	0.0408879	0.0286661	0.137257	0.0258978	0	0.0104885	0.0275134	0.097773	0.0372622
chr5	38990949	39003622	-	RICTOR	circRICTOR	circ20839	-0.137116	0.39067			1	1	1	1	1	1					0	0	0.0416418	0	0.0739318	0.0230579	0.0748812	0.0334009	0.103075	0.0806532	0.0631569	0.0409632	0	0.0601824	0	0.0368898	0.0527637	0.115489	0	0.0409579	0.306659	0.114664	0.0915045	0.0776933	0.0842395	0.0419542	0.110054	0.097773	0.0124207
chr5	43161931	43161249	+	ZNF131	circZNF131	circ20859	-0.491764	0.1895		down_Mturquoise	1	1	1	1	1	1					0	0	0.0277612	0.0259721	0	0	0.0124802	0	0.0824599	0.0403266	0.0180448	0.0307224	0.0131561	0.0120365	0.019575	0	0.0175879	0.0659937	0	0.0204789	0.122664	0.0573322	0.0686283	0	0.0280798	0.0734198	0	0.0558703	0.0124207
chr5	50763242	50750151	+	PARP8	circPARP8	circ20873	-0.718174	0.0387999	down	down_Mturquoise	1	1	1	1	1	1			1	1	1	1	0	0	0.0246439	0	0.0124802	0	0	0.0201633	0.0270672	0	0	0	0	0	0	0	0	0.0102395	0.0817759	0.0286661	0.0686283	0	0.0140399	0.0209771	0	0.0139676	0
chr5	55645789	55664863	-	SLC38A9	circSLC38A9	circ20924	0.275588	0.627482		down_Mturquoise	1	1	1	1	1	1			1		1	0	0.0416418	0	0	0	0	0	0	0	0.0180448	0	0	0.0361094	0	0	0.0175879	0	0	0	0	0.0573322	0.114381	0.0517955	0.0140399	0	0.0550268	0.0139676	0
chr5	57231321	57230846	+	GPBP1	circGPBP1_1	circ20939	0.288855	0.5243			1	1	1	1	1	1					0	0	0	0	0	0	0	0	0.020615	0.0100817	0	0.0102408	0.0131561	0.0601824	0	0.0245932	0.0175879	0.0494953	0	0.0102395	0.020444	0.0573322	0.0228761	0	0.0280798	0	0.0275134	0	0.0124207
chr5	57251141	57246300	+	GPBP1	circGPBP1_2	circ20943	-0.114755	0.697482			1	0	1	1	1	1					0	0	0.0555224	0.0389581	0	0.011529	0.0124802	0.0167004	0.04123	0.030245	0.0451121	0.0204816	0.0131561	0.0361094	0	0	0.0527637	0	0.0487752	0.0204789	0.0817759	0.0573322	0.0457522	0.0517955	0.0140399	0.0209771	0.0550268	0.0139676	0.0124207
chr5	59180595	59215968	-	PDE4D	circPDE4D	circ20950	0.0844938	0.813454			1	1	1	1	1	1			1	1	1	1	0.0277612	0.0259721	0.0492879	0.0345869	0.0249604	0	0	0.0201633	0.0270672	0.0204816	0.0657806	0.0120365	0.0587249	0.0122966	0.0175879	0.0659937	0.0975504	0	0.020444	0.0286661	0.0228761	0	0.0140399	0.0524427	0	0.0279352	0.0372622
chr5	64804386	64788951	+	CWC27	circCWC27	circ20992	-0.346237	0.211399			1	1	1	1	1	1			1	1	1	1	0.0138806	0.0389581	0	0	0.0124802	0.0167004	0.020615	0.0100817	0.0631569	0.0307224	0.0263123	0	0.0587249	0	0	0.0494953	0.146326	0.0307184	0	0.143331	0	0.0517955	0.0421197	0.0104885	0.0825402	0	0.0248414
chr5	65572286	65567513	+	PPWD1	circPPWD1	circ21003	0.646314	0.0752754			1	1	1	1	1	1			1		1	0	0.0277612	0	0	0	0.062401	0	0	0.0201633	0.0451121	0.0409632	0	0.108328	0.0587249	0.0245932	0.0351758	0.0329968	0.0731628	0.0307184	0.163552	0	0	0.0776933	0	0	0.0825402	0	0.0248414
chr5	65994864	65988635	+	ERBIN	circERBIN	circ21020	0.0717465	0.57067			1	1	1	1	1	1			1	1	1	1	0.0138806	0	0	0	0.0124802	0.0167004	0	0.0100817	0.00902241	0.0102408	0.0131561	0.0120365	0	0	0	0.0164984	0	0	0	0.0286661	0.0457522	0.0258978	0.0140399	0	0.0275134	0.0279352	0
chr5	68227009	68226290	+	PIK3R1	circPIK3R1	circ21051	0.246151	0.131297			1	1	1	1	1	1			1	1	1	1	0.0277612	0.0259721	0.12322	0.0345869	0.0873614	0.0334009	0.0824599	0.030245	0.0270672	0.0921672	0.118405	0.120365	0.03915	0.0368898	0.0351758	0.0164984	0.0731628	0.0307184	0.10222	0.143331	0.0228761	0	0.0701996	0.0629312	0.110054	0	0.0496829
chr5	71512428	71502599	+	BDP1	circBDP1_1	circ21068	-0.152211	0.835699			1	1	1	1	1	1					0	0	0.0277612	0.012986	0.0739318	0.0230579	0.0124802	0	0.020615	0	0.0360896	0	0.0920929	0.0240729	0.019575	0	0.0351758	0	0.0243876	0.0307184	0.0408879	0.0286661	0.0686283	0	0.0701996	0.0524427	0.0550268	0.0279352	0.0248414
chr5	71532427	71522289	+	BDP1	circBDP1_2	circ21078	0.089172	0.985003			1	1	1	1	1	1					0	0	0.0138806	0	0.0246439	0	0.0124802	0	0.020615	0.0100817	0.0180448	0.0102408	0.0263123	0	0	0.0245932	0.0175879	0	0	0	0.0613319	0	0.0228761	0	0.0561596	0.0104885	0	0	0.0124207
chr5	72865729	72861808	+	TNPO1	circTNPO1	circ21097	0.24713	0.618305			1	1	1	1	1	1			1		1	0	0	0.0389581	0	0	0	0.0334009	0	0	0	0	0	0.0240729	0.019575	0.0245932	0	0.0989905	0.0243876	0	0	0.0859983	0	0	0.0280798	0	0	0	0.0372622
chr5	73077493	73074742	+	FCHO2	circFCHO2	circ21108	0.215799	0.196764			1	1	1	1	1	1					0	0	0.0694031	0.0649301	0.0246439	0.0230579	0.0499208	0	0.061845	0.0604899	0.0360896	0.0204816	0.0526245	0.0240729	0.019575	0	0.0175879	0.0494953	0.0487752	0.0102395	0.0408879	0.0859983	0.0228761	0.103591	0.0140399	0.0524427	0.0550268	0.0419027	0.0496829
chr5	73840760	73840480	+	ARHGEF28	circARHGEF28	circ21115	0.00495976	0.944863		down_Mturquoise	1	1	1	1	1	1					0	0	0.0138806	0.012986	0	0	0	0	0	0.0201633	0.00902241	0	0	0.0120365	0.019575	0	0.0175879	0	0	0.0102395	0.0408879	0.0573322	0.0228761	0	0	0.0104885	0.0275134	0.0139676	0
chr5	74834426	74841679	-	FAM169A	circFAM169A	circ21131	0.0523943	0.751816			1	1	1	1	1	1			1	1	1	1	0.0832837	0.0649301	0.0739318	0.0230579	0.0873614	0.0167004	0.0824599	0.0604899	0.126314	0.12289	0.0263123	0.0842553	0.0587249	0.0614831	0.193467	0	0.0731628	0.0307184	0.306659	0.229329	0.205885	0.155387	0.196559	0.14684	0.220107	0.0698379	0.0372622
chr5	79396823	79457018	-	HOMER1	circHOMER1_1	circ21220	-0.287898	0.0218324			1	1	1	1	1	1			1		1	0	0.0555224	0.0779162	0.147864	0	0.0873614	0.0668018	0.04123	0.0604899	0.0270672	0.051204	0.118405	0.0601824	0.019575	0.0491865	0.0879395	0.115489	0.121938	0.102395	0.0817759	0.0859983	0.0915045	0.0258978	0.0842395	0.0314656	0.16508	0.0139676	0.0993658
chr5	79439010	79457018	-	HOMER1	circHOMER1_2	circ21224	-0.108211	0.0832614			1	1	1	1	1	1			1	1	1	1	0.513583	0.363609	0.665386	0.634092	0.474247	0.150304	0.24738	0.36294	0.306762	0.655411	0.420996	0.577751	0.35235	0.270526	0.422109	1.18789	0.341426	0.696284	0.940422	0.917316	0.297389	0.362569	0.631796	0.230748	0.440214	0.223481	0.546512
chr5	80474830	80449591	+	ZFYVE16	circZFYVE16	circ21246	-0.309433	0.548294		down_Mturquoise	1	1	1	1	1	1					0	0	0.0416418	0.012986	0.0492879	0	0.0374406	0	0	0.0403266	0.0270672	0.0307224	0.0263123	0.0722188	0.019575	0	0.0175879	0.0659937	0	0.0102395	0.0408879	0.0573322	0.0228761	0	0.0421197	0.0104885	0.0550268	0	0.0124207
chr5	80792844	80775694	+	MSH3	circMSH3	circ21262	0.313025	0.50375			1	1	1	1	1	1			1	1	1	1	0.0416418	0.0259721	0	0.011529	0.0249604	0	0.020615	0.0403266	0.0180448	0.0614448	0.0394684	0.0120365	0.019575	0.0491865	0.0527637	0.0329968	0	0.0204789	0.163552	0.0286661	0.114381	0.0258978	0.0280798	0	0	0.0279352	0.0124207
chr5	81615473	81650339	-	SSBP2	circSSBP2	circ21294	1.00681	0.000282044	up		1	1	1	1	1	1			1	1	1	1	0.0277612	0	0.0246439	0.011529	0	0.0167004	0.0824599	0.0403266	0.0631569	0.051204	0.0657806	0.120365	0.0587249	0	0.0351758	0.0494953	0	0.0409579	0.0817759	0.0859983	0.0457522	0.0258978	0.0842395	0.0209771	0	0.0419027	0.0496829
chr5	82312851	82310157	+	ATP6AP1L	circATP6AP1L	circ21297	-0.00624327	0.95306			1	1	1	1	1	1					0	0	0.0138806	0	0.0246439	0.0230579	0	0.0501013	0	0	0.00902241	0.0409632	0.0131561	0.0120365	0.019575	0	0	0.0989905	0.0731628	0	0.020444	0	0.0457522	0	0	0.0419542	0.0550268	0.0139676	0
chr5	83542268	83537007	+	VCAN	circVCAN	circ21301	-0.278668	0.0790244			1	1	1	1	1	1			1		1	0	0.0138806	0.0649301	0.0246439	0.0461158	0.0374406	0.0334009	0.04123	0.030245	0.00902241	0.0716856	0.0394684	0.0120365	0	0.0122966	0.0879395	0.0164984	0	0.0102395	0	0	0	0.0258978	0.0561596	0.0209771	0	0.0279352	0.0993658
chr5	84060300	84066606	-	EDIL3	circEDIL3	circ21305	0.0380588	0.979824			1	1	1	1	1	1			1	1	1	1	0.0138806	0.012986	0	0.0345869	0	0.0167004	0	0.0201633	0.00902241	0.0102408	0	0.0120365	0	0	0	0.0164984	0.0243876	0.0102395	0.020444	0.0286661	0	0.0258978	0	0.0419542	0	0.0139676	0.0124207
chr5	88749070	88761328	-	MEF2C	circMEF2C	circ21318	0.240074	0.517381			1	1	1	1	1	1			1	1	1	1	0.0138806	0	0	0	0	0.0167004	0	0.0100817	0.00902241	0.0204816	0	0.0240729	0	0.0245932	0.0351758	0.0164984	0.0487752	0.0102395	0.020444	0	0	0.0258978	0	0	0.0275134	0.0139676	0.0124207
chr5	90779097	90763305	+	ADGRV1	circADGRV1	circ21339	0.0972712	0.602997			1	1	1	1	1	1					0	0	0	0	0.0246439	0.0345869	0.0374406	0	0	0	0.00902241	0	0	0.0240729	0.019575	0	0.0527637	0.0659937	0	0.0102395	0.0408879	0.0286661	0	0	0.0280798	0.0314656	0.0550268	0.0139676	0.0124207
chr5	93553761	93563463	-	NR2F1-AS1	circNR2F1-AS1	circ21366	0.0510116	0.905888			1	1	1	1	1	1					0	0	0	0	0	0.0230579	0.0124802	0.0167004	0.04123	0.030245	0.0360896	0	0.0263123	0	0.019575	0.0245932	0.0175879	0.0494953	0.0487752	0.0204789	0.0408879	0.114664	0.0228761	0.0517955	0	0.0314656	0	0.0139676	0
chr5	94868333	94912976	-	MCTP1	circMCTP1	circ21395	-0.269518	0.735589			1	1	1	1	1	1			1	1	1	1	0	0.012986	0.0246439	0	0	0.0334009	0	0.0201633	0.00902241	0.0102408	0	0.0361094	0	0	0.0175879	0.0164984	0.0243876	0	0	0	0.0686283	0	0.0280798	0.0419542	0	0	0
chr5	95763620	95755396	+	RHOBTB3	circRHOBTB3	circ21412	-0.300161	0.28096			1	1	1	1	1	1					0	0	0.0555224	0	0.12322	0.0345869	0.0748812	0.0668018	0.0824599	0.0705716	0.0812017	0.0307224	0.105249	0.132401	0.0978749	0.0368898	0.105527	0.0659937	0.0731628	0.0409579	0.408879	0.315327	0.297389	0.103591	0.0421197	0.0629312	0.0825402	0.097773	0.0248414
chr5	108186117	108348530	-	FBXL17	circFBXL17_1	circ19972	0.450193	0.149759			1	0	1	1	1	1			1	1	1	1	0	0.0259721	0.0246439	0	0	0	0.020615	0	0.00902241	0.0204816	0.0131561	0.0120365	0.0587249	0	0.0351758	0.0659937	0.0975504	0.0102395	0.020444	0	0	0	0	0.0419542	0	0.0419027	0.0124207
chr5	108348399	108367953	-	FBXL17	circFBXL17_2	circ19975	0.0961863	0.639366			1	1	1	1	1	1	1	1	1	1	1	1	0.0971643	0	0.0492879	0	0	0	0.04123	0.0504083	0.0541345	0.0409632	0.0657806	0.0601824	0.03915	0.0122966	0.0703516	0.0164984	0	0.0204789	0.0817759	0.0286661	0.0915045	0.0258978	0.0421197	0.0419542	0.0550268	0	0.0248414
chr5	108798389	108768093	+	FER	circFER	circ19976	0.455181	0.113957		down_Mturquoise	1	1	1	1	1	1					0	0	0.0138806	0	0	0.011529	0	0.0334009	0.020615	0.030245	0.0180448	0.0102408	0.0131561	0.0481459	0.11745	0.0245932	0.0175879	0.0164984	0.0731628	0.0204789	0	0.0573322	0	0	0.0140399	0.0104885	0.0825402	0.0419027	0.0372622
chr5	109716264	109713520	+	MAN2A1	circMAN2A1	circ20012	0.53972	0.0486551	up		1	1	1	1	1	1	1	1	1	1	1	1	0.0277612	0.0259721	0.0246439	0.0230579	0.0249604	0	0.04123	0.030245	0.0270672	0.0204816	0.0394684	0.0361094	0.0587249	0.0245932	0.0527637	0.0329968	0	0	0	0.0573322	0.0457522	0.0776933	0.0140399	0.0104885	0.0825402	0.0279352	0.0124207
chr5	111394782	111344024	+	CAMK4	circCAMK4	circ20064	-0.0555285	0.794501			1	1	1	1	1	1	1	1	1	1	1	1	0.0832837	0.012986	0.0246439	0	0	0	0	0.0201633	0.0451121	0.0204816	0.0263123	0.0361094	0	0	0.0527637	0	0.0243876	0.0307184	0	0.0286661	0.0457522	0.0258978	0.0561596	0.0209771	0	0.0139676	0
chr5	112801383	112766326	+	APC	circAPC	circ20083	0.175028	0.46489			1	1	1	1	1	1	1	1	1	1	1	1	0.0694031	0.0259721	0.0739318	0.0230579	0.0249604	0	0.04123	0.0504083	0.0270672	0.0102408	0.0657806	0.0361094	0	0	0	0.0164984	0.0243876	0	0.020444	0.0573322	0	0	0	0.0104885	0	0.0279352	0
chr5	114404856	114404438	+	KCNN2	circKCNN2	circ20106	-0.0925499	0.619953		down_Mturquoise	1	1	1	1	1	1	1	1	1	1	1	1	0.263732	0.0779162	0.418947	0.0461158	0.299525	0.116903	0.144305	0.171388	0.26165	0.184334	0.513089	0.300912	0.1566	0.0368898	0.193467	0.52795	0.170713	0.286705	0.490655	0.458658	0.366018	0.207182	0.294838	0.220259	0.330161	0.293319	0.124207
chr5	123557564	123545417	+	CSNK1G3	circCSNK1G3	circ20148	-0.230018	0.105638			1	1	1	1	1	1	1	1	1	1	1	1	0.0971643	0.0259721	0.0492879	0.011529	0.0124802	0	0.061845	0.0806532	0.0541345	0.112649	0.0789368	0	0.0587249	0.0614831	0.0527637	0.0659937	0.0975504	0.0511973	0.0613319	0.0573322	0.0686283	0.0258978	0.0982794	0.0314656	0.0825402	0.139676	0.0745243
chr5	124701014	124701269	-	ZNF608	circZNF608	circ20158	-0.124959	0.515412			1	1	1	1	1	1	1	1	1	1	1	1	0.0277612	0.0259721	0.0492879	0.0576448	0.062401	0	0.0824599	0.030245	0.0360896	0.112649	0.0657806	0.0240729	0.019575	0.0368898	0.0351758	0.0329968	0.0243876	0.102395	0.020444	0.0573322	0	0	0.0701996	0.0209771	0.0550268	0.0419027	0.0496829
chr5	126604183	126603570	+	PHAX	circPHAX	circ20161	0.480098	0.115152			1	1	1	1	1	1			1		1	0	0	0.0259721	0.0246439	0	0	0.0334009	0	0.0100817	0.0270672	0.0409632	0.0263123	0.0481459	0	0	0.0175879	0.0659937	0	0	0	0.0859983	0.0228761	0.0258978	0.0140399	0	0.0550268	0.0698379	0
chr5	128152805	128138597	+	SLC12A2	circSLC12A2	circ20175	-0.115754	0.436229			1	1	1	1	1	1					0	0	0.0138806	0.0259721	0.0985758	0.0230579	0.0124802	0.0668018	0	0	0.0541345	0.0307224	0.0263123	0.0240729	0.019575	0.0122966	0.0351758	0.0494953	0	0.0102395	0.0408879	0.0573322	0.0686283	0	0	0.0209771	0.0275134	0.0419027	0.0124207
chr5	136154163	136147832	+	SMAD5	circSMAD5	circ20293	-0.0976548	0.745577			1	1	1	1	1	1					0	0	0.0138806	0.0259721	0.0492879	0	0.0124802	0.0167004	0	0.030245	0.0180448	0.0204816	0	0.0240729	0.019575	0	0	0.0494953	0	0.0102395	0.0408879	0.0286661	0.0457522	0.0258978	0	0	0	0.0279352	0
chr5	137985257	137988315	-	FAM13B	circFAM13B_1	circ20314	-0.244961	0.244286			1	1	1	1	1	1					0	0	0.166567	0.116874	0.271083	0.0691737	0.149762	0.0501013	0.103075	0.141143	0.243605	0.13313	0.276279	0.20462	0.176175	0.0737797	0.228643	0.131987	0.243876	0.0819157	0.654207	0.286661	0.251637	0.0517955	0.224639	0.0943969	0.247621	0.195546	0.0621036
chr5	138006990	138021197	-	FAM13B	circFAM13B_2	circ20322	0.0558568	0.851685		down_Mturquoise	1	1	1	1	1	1			1		1	0	0	0.012986	0.0246439	0	0.0124802	0.0167004	0	0	0.0270672	0.0102408	0.0131561	0.0601824	0.019575	0	0.0175879	0.0164984	0	0	0	0	0	0	0	0.0104885	0.0275134	0.0279352	0
chr5	139364743	139363759	+	PAIP2	circPAIP2	circ20353	0.159571	0.709907			1	1	1	1	1	1	1	1	1	1	1	1	0.0277612	0	0	0	0.0124802	0.0167004	0	0	0.00902241	0	0	0.0240729	0.019575	0.0245932	0	0.0164984	0.0975504	0.0102395	0	0.0573322	0.0457522	0.0258978	0.0140399	0.0314656	0	0.0279352	0
chr5	140449305	140440119	+	ANKHD1,ANKHD1-EIF4EBP3	circANKHD1	circ20367	-0.246778	0.574492		down_Mturquoise	1	1	1	1	1	1	1	1	1	1	1	1	0.0138806	0.0259721	0.0246439	0	0.0249604	0.0334009	0.0824599	0.0504083	0.0812017	0	0.0526245	0.0481459	0	0.0491865	0	0	0	0.0409579	0.0613319	0.0286661	0.0228761	0.0517955	0.0701996	0.0629312	0.0275134	0.0419027	0.0124207
chr5	142932125	142885298	+	ARHGAP26	circARHGAP26_1	circ20402	-0.058056	0.871941			1	1	1	1	1	1	1		1		1	0	0.0416418	0.0649301	0.0739318	0.0922316	0.062401	0	0	0	0.0360896	0.0409632	0.0920929	0.132401	0.11745	0.0122966	0.0351758	0.0494953	0	0.0409579	0	0.114664	0	0.103591	0.112319	0.0943969	0.110054	0.0698379	0
chr5	143057747	143037196	+	ARHGAP26	circARHGAP26_2	circ20416	-0.148308	0.723195			1	1	1	1	1	1	1	1	1	1	1	1	0.0694031	0	0.12322	0	0.0873614	0	0	0	0.0541345	0.0921672	0.0920929	0.0962918	0.0587249	0.0614831	0.105527	0	0.146326	0.0511973	0.143108	0.229329	0.137257	0.103591	0.112319	0.0734198	0.0825402	0.111741	0
chr5	143057747	143054439	+	ARHGAP26	circARHGAP26_3	circ20418	0.144621	0.243947			1	1	1	1	1	1			1		1	0	0.0138806	0.012986	0	0.0230579	0.0374406	0.0835022	0	0.0201633	0.0360896	0.0102408	0.0131561	0	0.0782999	0.0122966	0	0.0824921	0	0.0102395	0	0	0.0457522	0.0258978	0.0140399	0.0314656	0	0	0.0621036
chr5	146258593	146254943	+	RBM27,AC091959.3	circRBM27	circ20457	0.210737	0.475629			1	1	1	1	1	1	1	1	1	1	1	1	0.0277612	0	0	0	0	0.0167004	0.020615	0.0201633	0	0.0102408	0	0.0240729	0.019575	0	0	0.0659937	0	0	0	0.0286661	0	0.0776933	0	0.0209771	0	0.111741	0.0372622
chr5	146691128	146701142	-	PPP2R2B	circPPP2R2B	circ20464	0.606505	0.0233388	up	down_Mturquoise	1	1	1	1	1	1	1	1	1	1	1	1	0.0138806	0	0.0246439	0.011529	0	0	0.04123	0.0403266	0.0180448	0.0307224	0.0263123	0.0120365	0	0	0	0.0659937	0.0243876	0	0.0613319	0.0286661	0.0228761	0.0258978	0	0	0	0.0279352	0
chr5	157304366	157294783	+	CYFIP2	circCYFIP2	circ20539	0.0964484	0.596085			1	1	1	1	1	1					0	0	0	0.0259721	0	0	0.0124802	0	0	0.030245	0.0270672	0.0102408	0.0131561	0.0240729	0.03915	0.0122966	0	0.0329968	0	0.0102395	0.0408879	0	0	0.0258978	0.0280798	0.0104885	0.0275134	0	0.0372622
chr5	161330883	161336769	-	GABRB2	circGABRB2	circ20567	-0.152518	0.641437			1	1	1	1	1	1			1	1	1	1	0	0.0389581	0.0492879	0	0	0.0167004	0	0.0100817	0.0180448	0.0102408	0.0131561	0.0120365	0.019575	0	0.0527637	0.0164984	0.121938	0	0.10222	0.0859983	0	0	0.0842395	0.0104885	0.0550268	0.0279352	0.0124207
chr5	168494650	168488602	+	RARS	circRARS	circ20583	0.0445342	0.96489			1	1	1	1	1	1					0	0	0.0694031	0.0259721	0.0985758	0.0230579	0.149762	0.0501013	0.309225	0.0907349	0.0721793	0.13313	0.197342	0.132401	0.0782999	0.0491865	0.123115	0.0494953	0.121938	0.102395	0.490655	0.286661	0.297389	0.0517955	0.182519	0.104885	0.137567	0.0279352	0.0993658
chr5	171205612	171183195	+	RANBP17	circRANBP17	circ20604	0.422518	0.0701576			1	1	0	0	1	1					0	0	0.0832837	0.0389581	0.0739318	0.0345869	0.0249604	0.0501013	0.0824599	0.141143	0.0902241	0.0921672	0.105249	0.0361094	0.11745	0.0491865	0.211055	0.0494953	0.0731628	0.0307184	0.408879	0.200663	0.183009	0.0517955	0.112319	0.0314656	0.0825402	0	0.0496829
chr5	176943335	176958154	-	UIMC1	circUIMC1	circ20629	0.155221	0.367749		down_Mturquoise	1	1	1	1	1	1	1	1	1	1	1	1	0	0.103888	0.221795	0.126818	0.174723	0.0668018	0.20615	0.282286	0.324807	0.409632	0.434152	0.216657	0.1566	0.0983729	0.492461	0.21448	0.243876	0	0.776871	0.0859983	0.549027	0.103591	0.196559	0.167817	0.0550268	0.195546	0
chr5	177212195	177191884	+	NSD1	circNSD1	circ20644	0.0777032	0.613172			1	1	1	1	1	1	1	1	1	1	1	1	0	0.0259721	0.0246439	0.0230579	0	0.0668018	0.04123	0	0.0180448	0.0102408	0	0.0120365	0.0587249	0	0	0.0659937	0.0243876	0	0	0	0	0	0.0140399	0.0209771	0.0275134	0	0
chr5	177536358	177539147	-	FAM193B	circFAM193B	circ20656	0.299519	0.460536			1	1	1	1	1	1			1		1	0	0	0.0519441	0.0246439	0.0345869	0.0124802	0.0501013	0	0.0100817	0.00902241	0	0	0.0240729	0.03915	0	0	0.0659937	0	0.0204789	0	0.0859983	0.0228761	0	0	0.0524427	0	0.0419027	0.0124207
chr5	180261684	180280608	-	MAPK9	circMAPK9	circ20689	-0.293065	0.110848			1	1	1	1	1	1					0	0	0.0971643	0	0.0492879	0.0230579	0.0748812	0.0167004	0.04123	0.0504083	0.0541345	0.051204	0.105249	0.0601824	0.019575	0.0245932	0.0175879	0.0659937	0.0243876	0.0511973	0.122664	0.171997	0.205885	0.129489	0.0701996	0.0314656	0.0825402	0.0139676	0.0124207
chr6	4892379	4891713	+	CDYL	circCDYL	circ22401	-0.0917812	0.738395		down_Mturquoise	1	1	1	1	1	1	1	1	1	1	1	1	0.291493	0.207776	0.345015	0.195992	0.349445	0.100203	0.24738	0.171388	0.315784	0.368669	0.40784	0.397204	0.215325	0.196746	0.404522	0.31347	0.243876	0.307184	0.858646	0.429992	0.503274	0.207182	0.379078	0.167817	0.550268	0.391092	0.161469
chr6	6366355	6438732	-	LY86-AS1	circLY86-AS1	circ22492	-0.310614	0.131691		down_Mturquoise	1	0	0	0	1	0					0	0	0.0277612	0.0389581	0	0	0.0124802	0	0	0.0504083	0.0270672	0.0204816	0.0657806	0.108328	0.03915	0	0.0351758	0.0494953	0	0.0204789	0.122664	0	0.137257	0	0	0.0104885	0.0550268	0	0
chr6	13230193	13227816	+	PHACTR1	circPHACTR1	circ21721	-0.3919	0.193254			1	1	1	1	1	1	1	1	1	1	1	1	0	0.012986	0.0246439	0	0.0124802	0	0.020615	0.0201633	0.0360896	0.0204816	0.0131561	0.0361094	0.019575	0.0122966	0	0.0164984	0	0.0102395	0.0817759	0	0.0686283	0	0.0140399	0	0	0.0139676	0.0124207
chr6	13584225	13579451	+	SIRT5	circSIRT5_1	circ21753	0.0701192	0.924421			1	1	1	1	1	1					0	0	0	0	0.0246439	0	0.0249604	0.0334009	0.020615	0.0504083	0.00902241	0.0102408	0	0.0120365	0.019575	0.0122966	0	0.0164984	0	0.0102395	0.0408879	0.0573322	0.0228761	0	0.0421197	0	0.0550268	0.0139676	0
chr6	13600949	13579451	+	SIRT5	circSIRT5_2	circ21755	-0.187947	0.468599		down_Mturquoise	1	1	1	1	1	1					0	0	0	0	0.0246439	0.011529	0	0	0.020615	0.0100817	0.0451121	0.0307224	0.0263123	0.0481459	0.019575	0	0.0351758	0.0329968	0.0487752	0.0307184	0.0613319	0	0.0228761	0	0.0280798	0	0	0	0
chr6	13632370	13644729	-	RANBP9	circRANBP9_1	circ21762	-0.148824	0.368205		down_Mturquoise	1	1	1	1	1	1	1	1	1	1	1	1	0.0971643	0.0779162	0.172508	0.0691737	0.112322	0.0167004	0.185535	0.0907349	0.153381	0.153612	0.157874	0.108328	0.0782999	0.0368898	0.123115	0.131987	0.0731628	0.143353	0.245328	0.143331	0.183009	0	0.112319	0.104885	0.110054	0.0419027	0.0745243
chr6	13639563	13644729	-	RANBP9	circRANBP9_2	circ21771	0.350448	0.36944			1	1	1	1	1	1	1	1	1	1	1	1	0.0416418	0	0.0246439	0.0230579	0	0	0	0	0	0.0307224	0.0131561	0.0240729	0	0	0	0	0	0	0.0817759	0.0573322	0	0	0.0140399	0.0209771	0.0275134	0.0139676	0.0248414
chr6	16326394	16328470	-	ATXN1	circATXN1	circ22040	-0.143148	0.43459			1	1	1	1	1	1			1	1	1	1	0.111045	0.207776	0.0246439	0.126818	0.149762	0.200405	0.103075	0.100817	0.0631569	0.051204	0.131561	0.0481459	0.0587249	0.0491865	0.0351758	0.0659937	0	0.0716763	0.0408879	0.0286661	0.0457522	0	0.0421197	0.0943969	0.0825402	0.0419027	0.0993658
chr6	17513954	17507169	+	CAP2	circCAP2	circ22122	-0.101369	0.627729			1	1	1	1	1	1			1	1	1	1	0.0277612	0.0389581	0	0.0230579	0	0	0	0.0201633	0	0.0102408	0.0131561	0.0240729	0.019575	0	0	0.0164984	0.0243876	0.0204789	0.020444	0.0286661	0	0	0.0140399	0.0104885	0.0550268	0	0.0372622
chr6	18236452	18258405	-	DEK	circDEK	circ22159	0.203388	0.146684			1	1	1	1	1	1					0	0	0.0832837	0.0649301	0.0246439	0.0345869	0.0998416	0.0501013	0.020615	0.0705716	0.0631569	0.0204816	0.105249	0.108328	0.137025	0.0122966	0.0175879	0.0989905	0.0731628	0.0204789	0.0817759	0.0859983	0	0.0258978	0.0842395	0.115374	0.110054	0.0698379	0.0372622
chr6	24475121	24479959	-	GPLD1	circGPLD1	circ22191	0.275975	0.387109			1	1	1	1	1	1					0	0	0	0.012986	0	0	0.0374406	0	0.020615	0.030245	0.0360896	0.0102408	0.0131561	0	0.019575	0.0122966	0.0175879	0.0164984	0.0487752	0.0102395	0	0.114664	0.0228761	0	0.0280798	0	0	0	0.0124207
chr6	25606273	25604812	+	CARMIL1	circCARMIL1	circ22230	0.199708	0.485075			1	1	1	1	1	1					0	0	0	0	0.0985758	0.0230579	0	0	0.04123	0.030245	0.00902241	0	0.0263123	0.0120365	0.019575	0	0.0527637	0.0329968	0	0.0204789	0.020444	0	0	0	0	0.0104885	0	0.0279352	0.0124207
chr6	38577600	38598121	-	BTBD9	circBTBD9	circ22307	-0.178414	0.882144		down_Mturquoise	1	1	1	1	1	1	1	1	1	1	1	1	0	0	0.0985758	0	0.0748812	0	0	0.0504083	0	0	0.0920929	0.0120365	0	0	0.0879395	0	0.0243876	0	0.10222	0	0	0.0258978	0.0280798	0	0.0550268	0.0139676	0
chr6	42606651	42603588	+	UBR2	circUBR2_1	circ22323	0.301504	0.501129		down_Mturquoise	1	1	1	1	1	1			1		1	0	0	0.012986	0	0.011529	0.0124802	0	0	0.0403266	0.00902241	0.051204	0	0.0120365	0	0	0.0351758	0	0	0.0102395	0.020444	0	0.0228761	0	0.0140399	0.0314656	0	0	0
chr6	42632904	42615071	+	UBR2	circUBR2_2	circ22330	0.0979465	0.852587			1	1	1	1	1	1					0	0	0.0277612	0.012986	0	0	0	0	0.04123	0.030245	0.0180448	0.0102408	0.0394684	0.0240729	0	0	0.0175879	0.0329968	0.0243876	0.0102395	0	0.0859983	0.0228761	0.0258978	0.0280798	0	0	0.0698379	0
chr6	42974003	42975038	-	PEX6	circPEX6	circ22361	0.300196	0.275124		down_Mturquoise	1	1	1	1	1	1					0	0	0.0277612	0	0.0246439	0.0345869	0.0249604	0.0167004	0.020615	0.0403266	0.00902241	0.0102408	0.0263123	0.0240729	0.019575	0.0368898	0.0351758	0	0.0487752	0.0102395	0.020444	0.0286661	0	0	0.0421197	0.0104885	0.0275134	0.0139676	0
chr6	45003653	45365301	-	SUPT3H	circSUPT3H	circ22391	0.35356	0.204706		down_Mturquoise	1	0	1	1	1	1					0	0	0.0138806	0	0.0246439	0	0	0.0167004	0.020615	0.030245	0	0	0	0.0120365	0.0587249	0.0122966	0.0175879	0.0494953	0	0	0.143108	0	0.0915045	0.0258978	0.0421197	0	0	0.0419027	0
chr6	47283938	47286595	-	TNFRSF21	circTNFRSF21	circ22397	-0.326755	0.0984104		down_Mturquoise	1	1	1	1	1	1			1	1	1	1	0.0555224	0.0779162	0.0985758	0.0230579	0.0249604	0.0167004	0.020615	0.0403266	0.0270672	0.0307224	0.0657806	0.0601824	0	0.0245932	0.0175879	0.0164984	0	0.0307184	0.0408879	0.0286661	0.0228761	0.0258978	0.0280798	0.0314656	0.0275134	0.0558703	0.0124207
chr6	53076543	53071057	+	FBXO9	circFBXO9	circ22404	-0.0776969	0.694239			1	1	1	1	1	1			1		1	0	0.0277612	0	0.0246439	0	0.0249604	0.0501013	0.04123	0	0.0180448	0.0102408	0.0131561	0.0120365	0	0.0245932	0	0.0164984	0	0.0102395	0.020444	0.0573322	0.0457522	0	0	0.0104885	0	0	0
chr6	54169572	54149056	+	MLIP	circMLIP_1	circ22411	0.742481	0.137821			1	1	1	1	1	1			1	1	1	1	0.0138806	0	0	0.011529	0	0	0.020615	0.0201633	0	0.0204816	0.0394684	0	0.0978749	0	0.0175879	0.0659937	0.0243876	0	0.0817759	0.200663	0	0	0	0.0104885	0	0.0139676	0
chr6	54202233	54149056	+	MLIP	circMLIP_2	circ22416	-0.0391657	0.932561			1	1	1	1	1	1			1	1	1	1	0	0	0.147864	0.0922316	0.61153	0.0334009	0.20615	0.30245	0.171426	0.51204	0.420996	0.493495	0.3132	0.147559	0.369346	0	0.170713	0	0	1.54797	0	0.336671	0.238678	0.157328	0.330161	0.349189	0
chr6	54202233	54160367	+	MLIP	circMLIP_3	circ22417	-0.928787	0.0262191	down	down_Mturquoise	1	1	1	1	1	1			1	1	1	1	0	0.012986	0	0.011529	0	0	0	0.0100817	0	0.0409632	0	0	0	0.0245932	0.0175879	0.0164984	0.0975504	0.0204789	0.0817759	0.0286661	0.0228761	0	0	0	0	0.0279352	0.0372622
chr6	54230917	54149056	+	MLIP	circMLIP_4	circ22419	-0.0442315	0.604361			1	1	1	1	1	1			1	1	1	1	0.0832837	0	0.542167	0.0807027	0	0.0501013	0.0824599	0	0	0	0.0657806	0.180547	0.137025	0.0737797	0	0	0.170713	0.0409579	0	0	0	0	0.0561596	0.104885	0.357674	0.195546	0
chr6	55495419	55542140	-	HMGCLL1	circHMGCLL1	circ22431	0.506166	0.056882			1	1	1	1	1	1			1	1	1	1	0.0277612	0.012986	0	0	0.0124802	0	0.04123	0.0100817	0.0360896	0.0307224	0.0131561	0.0240729	0.019575	0	0.0351758	0.0329968	0.0487752	0.0204789	0.0613319	0.143331	0.0228761	0.0517955	0.0280798	0.0104885	0.0825402	0.0419027	0.0248414
chr6	56992555	56981711	+	BEND6	circBEND6	circ22457	-0.373394	0.101047		down_Mturquoise	1	1	1	1	1	1					0	0	0.0277612	0	0	0.011529	0.0249604	0	0	0.0403266	0	0	0.0394684	0.0361094	0	0	0.0527637	0.0164984	0.0487752	0	0.0613319	0.0286661	0	0	0	0.0104885	0.0550268	0.0279352	0.0124207
chr6	57193842	57210445	-	RAB23	circRAB23	circ22472	-0.194322	0.487744		down_Mturquoise	1	1	1	1	1	1					0	0	0.0277612	0.0259721	0.0739318	0.011529	0.0499208	0.0167004	0	0.0100817	0.0180448	0.0409632	0.0263123	0.0601824	0.019575	0	0.0351758	0.0164984	0.0243876	0.0307184	0.0613319	0.0573322	0.0457522	0.0776933	0.0280798	0.0209771	0.0550268	0.0279352	0
chr6	68956809	68930559	+	ADGRB3	circADGRB3_1	circ22504	-0.262589	0.182558			1	1	1	1	1	1			1	1	1	1	0.0555224	0.012986	0.271083	0.011529	0.0124802	0	0	0.0504083	0.0721793	0.051204	0.118405	0.120365	0.019575	0.0368898	0.123115	0.0329968	0.0731628	0.0409579	0.0613319	0.114664	0.0686283	0	0.140399	0	0.0550268	0.0139676	0.0124207
chr6	69018499	68993768	+	ADGRB3	circADGRB3_2	circ22518	-0.109162	0.405421			1	1	1	1	1	1			1	1	1	1	0.0138806	0.0519441	0.0985758	0.0230579	0.0249604	0	0.061845	0.030245	0	0.0307224	0.0526245	0.0240729	0.019575	0	0.0351758	0.0494953	0	0.0511973	0.0817759	0	0.160133	0	0.0421197	0.0314656	0.0275134	0.0139676	0
chr6	69049346	68993768	+	ADGRB3	circADGRB3_3	circ22522	-0.181713	0.405657			1	1	1	1	1	1			1	1	1	1	0.0277612	0	0.0985758	0	0.0374406	0.0167004	0.061845	0	0.0180448	0.0102408	0.0263123	0.0120365	0	0	0.0351758	0.0329968	0	0.0102395	0	0.0286661	0.0457522	0	0.0140399	0	0.0275134	0.0139676	0.0124207
chr6	69063036	68993768	+	ADGRB3	circADGRB3_4	circ22526	-0.810912	0.020819	down		1	1	1	1	1	1			1	1	1	1	0.0138806	0	0	0	0	0	0	0	0	0	0	0.0240729	0.019575	0.0245932	0.0879395	0.0494953	0	0.0102395	0.020444	0.0286661	0	0.0258978	0.0140399	0.0209771	0.0275134	0	0
chr6	69076038	69048185	+	ADGRB3	circADGRB3_5	circ22537	0.453885	0.0294413			1	1	1	1	1	1			1		1	0	0.0138806	0.0649301	0.0492879	0.0230579	0.062401	0.0501013	0.04123	0.0504083	0.0180448	0.0204816	0.0526245	0.0481459	0.0782999	0.0491865	0.0703516	0.0494953	0.0243876	0.0204789	0.0817759	0.114664	0.0686283	0.0517955	0.0701996	0.0419542	0	0.0558703	0.0248414
chr6	69239226	69233290	+	ADGRB3	circADGRB3_6	circ22544	0.452982	0.0517298			1	1	1	1	1	1			1	1	1	1	0.0971643	0.103888	0.0246439	0.0345869	0.062401	0.0835022	0.061845	0.0100817	0.00902241	0.0204816	0.0657806	0.108328	0.19575	0.0245932	0.0703516	0.544448	0.195101	0.0204789	0.143108	0.315327	0.137257	0.129489	0.0982794	0.0419542	0.137567	0.097773	0.149049
chr6	69737942	69790472	-	LMBRD1	circLMBRD1	circ22563	0.33173	0.542944			1	1	1	1	1	1			1	1	1	1	0	0.012986	0	0.011529	0	0.0334009	0.020615	0.030245	0.00902241	0.0204816	0.0263123	0.0481459	0	0	0.0351758	0	0	0.0307184	0.10222	0.0859983	0	0	0.0140399	0.0209771	0	0	0
chr6	72333835	72307258	+	RIMS1	circRIMS1	circ22620	-0.0107558	0.923817		down_Mturquoise	1	1	1	1	1	1			1	1	1	1	0.45806	0.246735	0.640742	0.138347	0.374406	0.534414	0.49476	0.373021	0.442098	0.573485	0.64465	0.312948	0.35235	0.282822	0.597988	0.445457	0.365814	0.266226	1.18575	0.974648	0.892168	0.284875	0.772195	0.188794	0.632808	0.279352	0.34778
chr6	73482244	73480675	+	MTO1	circMTO1	circ22633	-0.0604629	0.808153		down_Mturquoise	1	1	1	1	1	1					0	0	0.0138806	0.012986	0	0.0230579	0.0249604	0	0.020615	0.030245	0.0270672	0.0204816	0.0263123	0.0601824	0.03915	0.0491865	0.0351758	0.0494953	0	0.0204789	0.0613319	0	0	0	0.0421197	0.0314656	0.0275134	0.0279352	0
chr6	75663518	75634707	+	SENP6	circSENP6_1	circ22653	-0.236803	0.438132		down_Mturquoise	1	1	1	1	1	1					0	0	0	0.012986	0	0	0	0.0167004	0.04123	0	0.00902241	0.0307224	0.0526245	0.0120365	0.0587249	0.0122966	0.0527637	0	0	0.0102395	0.0817759	0.143331	0.0915045	0.0258978	0.0140399	0	0.0275134	0.0139676	0.0248414
chr6	75670720	75634707	+	SENP6	circSENP6_2	circ22655	0.133925	0.771378			1	1	1	1	1	1					0	0	0.0138806	0.012986	0.0985758	0	0.0374406	0.0167004	0.04123	0	0.0360896	0.0409632	0.0131561	0.0240729	0.019575	0.0122966	0.0703516	0.0329968	0.0243876	0.0409579	0.020444	0.0286661	0.0457522	0	0	0.0104885	0	0.0279352	0
chr6	75678927	75634707	+	SENP6	circSENP6_3	circ22660	-0.207996	0.312149			1	1	1	1	1	1					0	0	0.0971643	0.0909022	0.295727	0.0461158	0	0.100203	0.144305	0.0907349	0	0.0614448	0	0.0722188	0.0978749	0.0860763	0.0175879	0.0659937	0.0731628	0.153592	0.183996	0.0859983	0.0686283	0.0258978	0.140399	0.0629312	0.275134	0	0.0124207
chr6	75703072	75702645	+	SENP6	circSENP6_4	circ22669	-0.0744934	0.872356			1	1	1	1	1	1					0	0	0.0277612	0	0.0492879	0	0.0124802	0.0167004	0	0.0100817	0.00902241	0.0409632	0.0131561	0	0	0	0.0175879	0.0329968	0.0243876	0	0.143108	0	0.0457522	0	0.0280798	0.0104885	0.0275134	0.0139676	0
chr6	79042843	79060818	-	PHIP	circPHIP	circ22696	0.140461	0.503789			1	1	1	1	1	1	1	1	1	1	1	1	0.0416418	0.0259721	0.0492879	0.0230579	0.0374406	0.0835022	0.020615	0.0504083	0.0180448	0.051204	0.0131561	0.0240729	0.0587249	0	0.0703516	0.0824921	0.146326	0	0.183996	0	0	0.0258978	0.0842395	0.0419542	0.0275134	0.0279352	0
chr6	82214227	82214829	-	IBTK	circIBTK	circ22710	-0.173692	0.45598			1	1	1	1	1	1					0	0	0	0.012986	0	0.011529	0	0	0	0.0100817	0	0	0.0131561	0	0.03915	0	0.0175879	0.0659937	0	0	0.0408879	0	0.0228761	0.0258978	0	0.0209771	0	0	0.0124207
chr6	82957312	83044659	-	UBE3D	circUBE3D	circ22719	0.293777	0.309882			1	1	1	1	1	1	1	1	1	1	1	1	0	0.012986	0.0246439	0.011529	0	0	0.020615	0.0100817	0	0	0.0131561	0.0361094	0.03915	0.0122966	0	0.0494953	0.0243876	0.0102395	0	0.0286661	0	0.0258978	0	0.0104885	0.0275134	0.0279352	0.0248414
chr6	85557976	85574378	-	SNX14	circSNX14	circ22792	-0.0673447	0.768704		down_Mturquoise	1	1	1	1	1	1			1		1	0	0.0138806	0.0259721	0	0	0	0	0	0	0.00902241	0.0102408	0.0263123	0.0120365	0	0	0	0	0	0	0.20444	0.143331	0.0457522	0.0258978	0.0140399	0.0209771	0	0	0
chr6	87218731	87215903	+	ZNF292	circZNF292	circ22798	-0.0384725	0.932852			1	1	1	1	1	1			1	1	1	1	0.0416418	0.012986	0.0739318	0.011529	0.062401	0.0668018	0.061845	0.0705716	0.108269	0.0409632	0.0920929	0.0361094	0	0	0.0879395	0.0329968	0	0.0614368	0.122664	0.0859983	0.205885	0.0258978	0.0280798	0.0209771	0.0275134	0.0139676	0
chr6	88844357	88904955	-	RNGTT	circRNGTT	circ22820	0.0715225	0.687475			1	1	1	1	1	1					0	0	0.0138806	0.012986	0.12322	0.0230579	0.0374406	0.0334009	0.020615	0.0403266	0.0360896	0.0307224	0.0657806	0.0120365	0.0587249	0.0122966	0.0527637	0.0494953	0.0243876	0.0102395	0.0408879	0.143331	0.0686283	0	0.0701996	0.0419542	0.0825402	0.0419027	0.0372622
chr6	98899268	98927822	-	FBXL4	circFBXL4	circ22864	0.345234	0.328611			1	1	1	1	1	1					0	0	0.0277612	0	0.0246439	0	0.0124802	0	0	0	0	0	0.0263123	0.0120365	0.03915	0	0.0175879	0.0164984	0.0487752	0	0.020444	0.0573322	0	0.0258978	0	0.0209771	0	0.0419027	0.0124207
chr6	99439769	99465136	-	USP45	circUSP45	circ22874	-0.222159	0.457722			1	1	1	1	1	1					0	0	0	0.0259721	0.0246439	0	0.0249604	0.0334009	0	0.030245	0.00902241	0.0102408	0.0657806	0.0722188	0	0.0122966	0	0.0164984	0.0243876	0.0204789	0.020444	0.0286661	0	0.103591	0.0140399	0.0314656	0.110054	0.0279352	0
chr6	104833042	104843298	-	HACE1	circHACE1	circ21460	-0.389195	0.210883		down_Mturquoise	1	1	1	1	1	1			1	1	1	1	0.0138806	0.012986	0	0.011529	0.0124802	0	0	0	0.0180448	0.0204816	0	0.0361094	0	0.0122966	0.0175879	0.0329968	0	0.0511973	0.0408879	0	0	0	0.0561596	0.0104885	0	0.0279352	0
chr6	106248150	106308491	-	ATG5	circATG5	circ21473	-0.771319	0.0180622	down	down_Mturquoise	1	1	1	1	1	1					0	0	0	0.012986	0.0246439	0	0.0374406	0	0.04123	0	0.00902241	0.0409632	0.0131561	0.0481459	0	0.0122966	0	0	0	0.0204789	0.0408879	0	0	0	0	0	0	0	0
chr6	107506427	107503657	+	SOBP	circSOBP	circ21483	0.244585	0.139429			1	1	1	1	1	1			1	1	1	1	0.138806	0.0649301	0.0985758	0.0576448	0.149762	0.0835022	0.16492	0.141143	0.0631569	0.102408	0.0920929	0.144438	0.03915	0.0122966	0.123115	0.197981	0.219488	0.0614368	0.286215	0.286661	0.183009	0.129489	0.0842395	0.209771	0.137567	0.139676	0.161469
chr6	108876350	108854225	+	ARMC2	circARMC2	circ21515	0.185835	0.544835			1	1	1	1	1	1			1		1	0	0.0277612	0	0.0492879	0	0	0.0167004	0.020615	0.0100817	0.00902241	0	0	0.0240729	0.019575	0.0122966	0.0175879	0.0824921	0	0	0.020444	0	0.137257	0.0258978	0.0140399	0.0419542	0	0.0279352	0.0124207
chr6	116692392	116689320	+	KPNA5	circKPNA5_1	circ21619	-0.424308	0.0977749			0	0	1	1	1	1					0	0	0.0555224	0.012986	0	0.0230579	0.0124802	0.0334009	0.020615	0.0504083	0.00902241	0.0409632	0.0394684	0.0361094	0.03915	0	0.0703516	0.0494953	0	0.0102395	0.0817759	0.0286661	0.0228761	0.0776933	0.0421197	0.0209771	0.0275134	0.0279352	0
chr6	116705160	116698704	+	KPNA5	circKPNA5_2	circ21623	0.0514292	0.95476			1	1	1	1	1	1					0	0	0.0138806	0	0	0	0.0124802	0	0	0.0201633	0.0180448	0	0.0263123	0.0361094	0.019575	0	0.0175879	0.0329968	0	0	0.0408879	0.114664	0	0	0.0561596	0.0314656	0	0.0279352	0
chr6	118511298	118566316	-	CEP85L	circCEP85L	circ21639	0.0146148	0.814024			1	1	1	1	1	1					0	0	0	0.0259721	0.0246439	0.011529	0.0124802	0.0167004	0	0.0100817	0.00902241	0.0614448	0.0657806	0	0.03915	0	0.0703516	0.0329968	0	0.0204789	0.0408879	0.0859983	0.0457522	0	0.0421197	0.0104885	0	0.0419027	0.0124207
chr6	128064758	128067792	-	PTPRK	circPTPRK	circ21683	0.276128	0.398398			1	1	1	1	1	1					0	0	0	0.0259721	0.0246439	0	0.0124802	0.0167004	0.04123	0	0	0.0204816	0.0131561	0.0240729	0.019575	0	0.0175879	0	0	0.0102395	0.0408879	0.0286661	0	0.0258978	0	0	0.0275134	0	0.0248414
chr6	130955105	130956499	-	EPB41L2	circEPB41L2	circ21708	-0.176704	0.770522			1	1	1	1	1	1			1	1	1	1	0	0.0389581	0	0.0230579	0.0374406	0.0835022	0	0.030245	0.00902241	0.0102408	0.0131561	0.0481459	0	0.0122966	0.0175879	0.0659937	0	0.0102395	0.0817759	0.0286661	0	0.0258978	0.0140399	0.0104885	0.0550268	0.0139676	0
chr6	131169273	131145285	+	AKAP7	circAKAP7	circ21709	-0.212166	0.338764			1	1	1	1	1	1			1	1	1	1	0.0138806	0.0649301	0.0246439	0.0576448	0.0249604	0.0167004	0	0.030245	0.00902241	0.0102408	0.0131561	0.0361094	0.03915	0	0.0351758	0.0164984	0	0.0204789	0.10222	0.114664	0.0915045	0.0776933	0.0140399	0.0314656	0.0275134	0.0558703	0.0124207
chr6	133984671	133980082	+	TBPL1	circTBPL1	circ21724	-0.478438	0.176365			1	1	1	1	1	1			1	1	1	1	0	0	0.0492879	0.011529	0	0	0	0.0201633	0	0.0716856	0.0263123	0	0.019575	0	0	0.0329968	0	0.0102395	0.10222	0	0.0457522	0	0.0140399	0.0209771	0	0	0.0124207
chr6	136155758	136151160	+	PDE7B	circPDE7B	circ21758	-0.127415	0.391677		down_Mturquoise	1	1	1	1	1	1					0	0	0	0.0259721	0	0	0	0	0	0	0.0721793	0	0.0131561	0.0722188	0.03915	0	0.0527637	0	0	0.0614368	0	0.114664	0.0228761	0	0	0.0104885	0	0	0.0372622
chr6	136388393	136389517	-	MAP7	circMAP7	circ21770	-0.209674	0.37747			1	1	1	1	1	1			1		1	0	0.166567	0.181804	0.147864	0.138347	0.361926	0.0835022	0.267995	0.211715	0.207515	0.13313	0.381528	0.40924	0.371925	0.147559	0.123115	0.0824921	0.195101	0.0716763	0.551987	0.372659	0.320266	0.0776933	0.182519	0.125862	0.16508	0.167611	0.248414
chr6	136694140	136698682	-	MAP3K5	circMAP3K5	circ21794	0.00211468	0.903566			1	1	1	1	1	1			1		1	0	0.0694031	0	0.147864	0.011529	0.0124802	0	0.04123	0.030245	0.0721793	0.051204	0.0657806	0.0481459	0.019575	0.0245932	0.0351758	0.0164984	0	0.0102395	0.020444	0.171997	0.0457522	0.0258978	0.0280798	0.0104885	0.0825402	0.0558703	0
chr6	138335188	138333970	+	ARFGEF3	circARFGEF3	circ21803	-0.162637	0.702598		down_Mviolet	1	1	1	1	1	1					0	0	0.0138806	0	0	0	0.0249604	0	0.020615	0.0100817	0	0.0307224	0.0131561	0.0120365	0	0	0	0.0164984	0	0	0.020444	0.0286661	0	0.0258978	0.0280798	0	0	0.0279352	0.0248414
chr6	138943513	138944622	-	REPS1	circREPS1	circ21813	0.228154	0.304465			1	1	1	1	1	1					0	0	0.0138806	0.0259721	0	0.011529	0	0.0668018	0.020615	0.0100817	0.0270672	0.0204816	0	0.0722188	0.0978749	0.0122966	0.0175879	0.0494953	0.121938	0	0.10222	0.0573322	0.0457522	0	0.0421197	0.0314656	0	0.0558703	0
chr6	143474856	143470961	+	PEX3	circPEX3	circ21820	0.425284	0.187		down_Mturquoise	1	1	1	1	1	1					0	0	0.0277612	0.012986	0	0.011529	0.0124802	0.0167004	0.04123	0.0100817	0.00902241	0.0307224	0.0394684	0.0120365	0.019575	0.0245932	0.0175879	0.0329968	0	0	0.20444	0	0.0228761	0.0517955	0.0421197	0.0104885	0.0275134	0.0139676	0.0124207
chr6	145888020	145894977	-	SHPRH	circSHPRH_1	circ21841	-0.204948	0.694479			1	1	1	1	1	1					0	0	0	0.0259721	0	0	0	0.0167004	0	0.0201633	0.0451121	0	0.0394684	0	0.03915	0	0	0.0164984	0	0.0307184	0.020444	0.0573322	0	0.0258978	0.0280798	0	0.0275134	0.0279352	0
chr6	145919348	145933178	-	SHPRH	circSHPRH_2	circ21844	-0.22358	0.3687			1	1	1	1	1	1					0	0	0.0971643	0.0389581	0	0.011529	0.0374406	0.0501013	0.020615	0.0604899	0.0270672	0.051204	0	0.0601824	0.0587249	0	0.0527637	0.0824921	0.0487752	0.0102395	0.143108	0.0286661	0.137257	0.0517955	0.0280798	0.0943969	0.110054	0.0419027	0.0248414
chr6	147334222	147205971	+	STXBP5	circSTXBP5	circ21871	-0.380407	0.284249		down_Mturquoise	1	0	1	1	1	1					0	0	0.0138806	0.012986	0.0492879	0	0.0249604	0	0.061845	0.0403266	0.0270672	0.102408	0.0526245	0.0481459	0	0.0245932	0.0351758	0	0	0.0307184	0.10222	0	0.0228761	0	0.0280798	0.0209771	0.0550268	0.0279352	0
chr6	149512155	149541586	-	PPIL4	circPPIL4	circ21895	-0.00561541	0.934193			1	1	1	1	1	1			1		1	0	0	0.012986	0.0246439	0.011529	0.0124802	0	0.020615	0.030245	0.00902241	0.0102408	0.0526245	0	0.019575	0.0122966	0.0351758	0.0164984	0.0487752	0.0102395	0.0408879	0	0.0686283	0	0.0421197	0.0314656	0.0275134	0.0279352	0.0124207
chr6	149582603	149572285	+	GINM1	circGINM1	circ21897	0.150485	0.439481			1	1	1	1	1	1					0	0	0.0416418	0	0.0492879	0	0.0124802	0.0167004	0	0	0.00902241	0.0204816	0.0526245	0	0.0587249	0	0.0703516	0	0	0.0102395	0.122664	0.0573322	0	0	0.0701996	0.0104885	0	0.0139676	0.0248414
chr6	151353752	151348711	+	AKAP12	circAKAP12	circ21933	-0.719718	0.0555474			1	1	1	1	1	1					0	0	0.0277612	0.0519441	0.0492879	0.0807027	0.0998416	0.0501013	0.020615	0	0.0180448	0.0204816	0.0789368	0.0361094	0.03915	0.0245932	0.0351758	0.0494953	0	0.0307184	0	0	0	0.0258978	0.154439	0.0524427	0.0275134	0.0279352	0.0124207
chr6	152329730	152331890	-	SYNE1	circSYNE1_1	circ21947	-0.422963	0.486376			1	1	1	1	1	1					0	0	0	0.0259721	0.0246439	0	0	0.0167004	0	0	0.0180448	0.0102408	0.0263123	0.0120365	0	0	0	0.0329968	0	0	0	0	0	0	0.0701996	0.0209771	0	0	0.0124207
chr6	152628265	152628554	-	SYNE1	circSYNE1_2	circ21958	-0.312214	0.183495		down_Mviolet	1	1	1	1	1	1					0	0	0.22209	0.12986	0.147864	0.161405	0.212163	0	0.267995	0.131061	0.216538	0.215057	0.263123	0.337021	0.137025	0.0491865	0.0879395	0.148486	0.0975504	0.153592	0.327103	0.0859983	0.137257	0.23308	0.336958	0.209771	0.110054	0.209514	0.0745243
chr6	154795139	154773989	+	SCAF8	circSCAF8	circ21971	0.0738852	0.911409			1	1	1	1	1	1			1	1	1	1	0.0277612	0	0	0.0461158	0	0.0501013	0	0	0.0180448	0	0.0131561	0.0361094	0	0	0	0.0824921	0.0487752	0	0.0613319	0.0859983	0	0	0	0.0104885	0.0275134	0.0139676	0.0124207
chr6	158314268	158312051	+	TULP4	circTULP4_1	circ22014	0.00151179	0.929406			1	1	0	0	1	1	1	1			1	1	0.0416418	0.0389581	0.0492879	0.0922316	0.0249604	0.0334009	0.020615	0.0403266	0.0451121	0.0307224	0.0657806	0.0722188	0.0587249	0	0.0527637	0.0329968	0.0243876	0.0102395	0.020444	0.0573322	0.0228761	0.155387	0.0701996	0.104885	0.16508	0.0698379	0.0372622
chr6	158504178	158501678	+	TULP4	circTULP4_2	circ22021	0.017224	0.89838			1	1	1	1	1	1					0	0	0.0416418	0.0909022	0	0.0345869	0.0124802	0.0167004	0.020615	0.0201633	0.0360896	0	0	0.0361094	0.03915	0	0	0.0164984	0.0243876	0.0204789	0.0408879	0.0286661	0	0	0.0421197	0.0839083	0	0.0139676	0.0124207
chr6	158589782	158580940	+	TMEM181	circTMEM181	circ22025	0.262527	0.444358			1	1	1	1	1	1					0	0	0	0.012986	0.12322	0.011529	0	0.0334009	0.020615	0	0.0270672	0	0.0394684	0	0.0587249	0	0.0175879	0.0329968	0	0.0204789	0	0	0.0228761	0.0258978	0	0	0.0550268	0.0279352	0.0248414
chr6	163478896	163455279	+	QKI	circQKI	circ22043	0.175966	0.394521			1	1	1	1	1	1			1	1	1	1	0	0.012986	0.0492879	0.0807027	0	0.116903	0.061845	0.0504083	0.0360896	0	0.0263123	0.0601824	0.019575	0	0.0351758	0.0659937	0.0487752	0.0511973	0.10222	0.0286661	0.137257	0.0776933	0.0140399	0.0104885	0.0825402	0.0419027	0.111787
chr6	170537234	170549113	-	PSMB1	circPSMB1_1	circ22114	0.0849712	0.513934			1	1	1	1	1	1					0	0	0.152687	0.0519441	0.246439	0.0576448	0.137282	0	0.144305	0	0.198493	0.174094	0	0.264802	0	0.0983729	0.0175879	0.329968	0.121938	0.0819157	0.347547	0.458658	0.114381	0.0776933	0.112319	0.136351	0.137567	0	0.111787
chr6	170543601	170549113	-	PSMB1	circPSMB1_2	circ22116	-0.120148	0.666656		down_Mturquoise	1	1	1	1	1	1			1	1	1	1	0.0138806	0	0	0.011529	0	0.0167004	0	0.0100817	0.00902241	0.0307224	0.0131561	0.0240729	0.03915	0	0.0175879	0.0824921	0.0243876	0.0102395	0.020444	0.0859983	0.0457522	0	0	0	0	0.0419027	0.0124207
chr7	677229	711527	-	PRKAR1B	circPRKAR1B	circ24043	0.220957	0.202546			1	1	1	1	1	1			1		1	0	0	0	0	0.0230579	0	0.0167004	0.020615	0.0100817	0.0631569	0.0102408	0.0131561	0.0361094	0.11745	0	0	0.0329968	0.0487752	0	0.0613319	0.0859983	0	0	0	0.0104885	0	0.0419027	0.0124207
chr7	8060248	8003908	+	GLCCI1	circGLCCI1_1	circ24196	0.150102	0.706695		down_Mturquoise	1	1	1	1	1	1			1	1	1	1	0.0138806	0	0.0492879	0	0	0	0.020615	0.030245	0	0.0204816	0	0.0120365	0	0	0	0.0164984	0.121938	0	0.0613319	0.114664	0.0457522	0	0.0140399	0.0104885	0.0825402	0	0
chr7	8071131	8003908	+	GLCCI1	circGLCCI1_2	circ24197	-0.178656	0.532647		down_Mturquoise	1	1	1	1	1	1			1	1	1	1	0.0832837	0	0	0	0.0499208	0.0334009	0.04123	0.0604899	0.0270672	0.051204	0.0526245	0.156474	0.0587249	0.0122966	0.0351758	0.131987	0.0243876	0.0307184	0.122664	0.0859983	0.137257	0	0.0561596	0	0.110054	0.0279352	0.0248414
chr7	8218305	8236005	-	ICA1	circICA1	circ24231	-0.243303	0.150504			1	1	1	1	1	1	1	1	1	1	1	1	0.0694031	0.0389581	0.0739318	0.0230579	0.062401	0.0334009	0.103075	0.0907349	0.0902241	0.0819264	0.184186	0.0842553	0.0978749	0.0368898	0	0.148486	0.0243876	0.0409579	0.0817759	0.0859983	0.160133	0.0517955	0.126359	0.0629312	0.110054	0.223481	0.0372622
chr7	14574212	14673027	-	DGKB	circDGKB_1	circ23422	0.0109159	0.864588			1	1	1	1	1	1			1	1	1	1	0.0694031	0.12986	0.147864	0.0345869	0.112322	0.0668018	0.12369	0.0806532	0.0812017	0.051204	0.249966	0.192584	0.11745	0.0122966	0.0879395	0.131987	0	0.112634	0.163552	0.0859983	0.0686283	0.155387	0.0701996	0.104885	0.192594	0	0.0496829
chr7	14607434	14673027	-	DGKB	circDGKB_2	circ23433	-0.396049	0.309169		down_Mturquoise	1	1	1	1	1	1			1		1	0	0	0	0.0246439	0.011529	0.0124802	0	0	0.0100817	0.00902241	0.0409632	0.0263123	0.0120365	0.03915	0	0	0	0	0.0204789	0.0613319	0	0	0	0	0.0209771	0.0275134	0	0
chr7	14672929	14701730	-	DGKB	circDGKB_3	circ23448	-0.170503	0.635644			1	1	1	1	1	1			1	1	1	1	0	0	0.0492879	0.011529	0	0.0334009	0.04123	0.0201633	0.00902241	0.0102408	0	0	0.03915	0	0	0.0329968	0	0.0307184	0.020444	0.0286661	0	0	0	0.0104885	0	0.0279352	0
chr7	14672929	14736194	-	DGKB	circDGKB_4	circ23450	-0.461517	0.18347			1	1	1	1	1	1			1		1	0	0	0	0.147864	0.011529	0.0124802	0.0167004	0	0.0201633	0.0631569	0.0409632	0.0920929	0.0481459	0.03915	0	0.0351758	0.0824921	0	0.0204789	0.143108	0	0	0.0258978	0.0280798	0.0314656	0.0275134	0.0279352	0.0372622
chr7	16258390	16278226	-	ISPD	circISPD_1	circ23601	0.0729602	0.981534			1	1	1	1	1	1			1	1	1	1	0.0138806	0.0649301	0.172508	0	0.062401	0.0501013	0.12369	0	0.0902241	0.0102408	0.0394684	0.0240729	0	0.0122966	0.0527637	0.0329968	0.0487752	0.0307184	0.0408879	0.0286661	0	0	0.0561596	0	0	0.0558703	0
chr7	16376092	16406337	-	ISPD	circISPD_2	circ23609	-0.0436334	0.819706			1	1	1	1	1	1			1	1	1	1	0.0277612	0	0.0739318	0.011529	0	0	0	0.0201633	0	0.0204816	0.0263123	0.0240729	0.03915	0	0.0351758	0.0164984	0	0.0409579	0.020444	0.0573322	0.0228761	0	0.0701996	0.0104885	0.0550268	0.0139676	0.0124207
chr7	18666476	18666213	+	HDAC9	circHDAC9	circ23639	-0.483673	0.0270933		down_Mturquoise	1	1	1	1	1	1			1	1	1	1	0.0277612	0.0259721	0.0739318	0.0576448	0.0873614	0	0.061845	0.0604899	0.0812017	0.0614448	0.0789368	0.0361094	0.03915	0.0491865	0.123115	0	0	0.102395	0.0613319	0.0573322	0.0686283	0	0.0561596	0.0314656	0	0.0139676	0.0621036
chr7	22308339	22318037	-	RAPGEF5	circRAPGEF5	circ23683	0.0498747	0.91999			1	1	1	1	1	1			1		1	0	0.124926	0.0259721	0.0246439	0.0576448	0.062401	0	0.185535	0.110898	0.117291	0.143371	0.118405	0.156474	0.0782999	0.0614831	0.0879395	0.181483	0.0975504	0.0307184	0.122664	0.401326	0	0.0258978	0.168479	0.0629312	0.0275134	0.195546	0.0124207
chr7	22960256	22991139	-	FAM126A	circFAM126A	circ23685	-0.304404	0.26763			1	1	1	1	1	1	1	1	1	1	1	1	0	0.012986	0	0.0230579	0.0124802	0	0.020615	0	0	0.0307224	0	0.0120365	0.019575	0	0.0351758	0.0824921	0.0243876	0	0.0408879	0.0573322	0	0.0258978	0	0	0	0.0139676	0
chr7	23187146	23185070	+	NUPL2	circNUPL2	circ23697	-0.266068	0.248456			1	1	1	1	1	1					0	0	0	0	0	0.0230579	0.0124802	0.0167004	0	0.0504083	0.00902241	0.0307224	0	0.0240729	0.03915	0.0122966	0.0175879	0.0164984	0	0	0.020444	0.0573322	0.0228761	0	0.0280798	0	0	0.0139676	0
chr7	23611553	23611171	+	CCDC126	circCCDC126	circ23699	0.22626	0.322625		down_Mturquoise	1	1	1	1	1	1					0	0	0.0277612	0	0	0	0.0249604	0	0.061845	0.0201633	0.0180448	0.0409632	0	0.0240729	0.03915	0	0.0527637	0	0.0487752	0.0102395	0.0408879	0.0859983	0.0228761	0.0258978	0	0.0209771	0.0550268	0.0139676	0.0248414
chr7	24650712	24623663	+	MPP6	circMPP6_1	circ23708	-0.00230009	0.991469		down_Mturquoise	1	1	1	1	1	1					0	0	0.0138806	0.0259721	0.0492879	0.0230579	0.0124802	0.0167004	0.020615	0.0201633	0.0812017	0.0307224	0.0131561	0.0120365	0.1566	0.0122966	0.0703516	0.0164984	0.0487752	0.0204789	0.0817759	0.0286661	0.160133	0.103591	0.0561596	0.0104885	0.0275134	0.0279352	0.0372622
chr7	24650712	24623666	+	MPP6	circMPP6_2	circ23709	-0.00230009	0.991469		down_Mturquoise	1	1	1	1	1	1			1		1	0	0.0138806	0.0259721	0.0492879	0.0230579	0.0124802	0.0167004	0.020615	0.0201633	0.0812017	0.0307224	0.0131561	0.0120365	0.1566	0.0122966	0.0703516	0.0164984	0.0487752	0.0204789	0.0817759	0.0286661	0.160133	0.103591	0.0561596	0.0104885	0.0275134	0.0279352	0.0372622
chr7	24668660	24623663	+	MPP6	circMPP6_3	circ23716	0.115323	0.367402			1	1	0	0	1	1					0	0	0.0138806	0.012986	0.0985758	0.0345869	0.0124802	0.0167004	0.04123	0.0201633	0.0360896	0.0204816	0.0394684	0.0240729	0.0782999	0.0245932	0.0703516	0.0164984	0.0487752	0.0102395	0.122664	0.0286661	0.0228761	0.0258978	0.0140399	0.0209771	0.0275134	0.0558703	0.0496829
chr7	24668660	24623666	+	MPP6	circMPP6_4	circ23717	0.115323	0.367402			1	1	1	1	1	1	1	1	1	1	1	1	0.0138806	0.012986	0.0985758	0.0345869	0.0124802	0.0167004	0.04123	0.0201633	0.0360896	0.0204816	0.0394684	0.0240729	0.0782999	0.0245932	0.0703516	0.0164984	0.0487752	0.0102395	0.122664	0.0286661	0.0228761	0.0258978	0.0140399	0.0209771	0.0275134	0.0558703	0.0496829
chr7	24680520	24623663	+	MPP6	circMPP6_5	circ23720	0.210623	0.376146			1	1	0	0	1	1					0	0	0	0.0259721	0	0	0	0	0.020615	0.0100817	0.00902241	0.0204816	0.0131561	0.0120365	0.176175	0	0.0175879	0.0164984	0.0487752	0.0102395	0.0408879	0	0.0228761	0.0517955	0.0140399	0.0419542	0	0	0.0248414
chr7	24680520	24623666	+	MPP6	circMPP6_6	circ23721	0.210623	0.376146			1	1	1	1	1	1					0	0	0	0.0259721	0	0	0	0	0.020615	0.0100817	0.00902241	0.0204816	0.0131561	0.0120365	0.176175	0	0.0175879	0.0164984	0.0487752	0.0102395	0.0408879	0	0.0228761	0.0517955	0.0140399	0.0419542	0	0	0.0248414
chr7	26844030	26854890	-	SKAP2	circSKAP2	circ23736	0.574987	0.106072		down_Mturquoise	1	1	1	1	1	1			1		1	0	0.0138806	0.0519441	0.0246439	0	0	0	0	0	0.0360896	0.0716856	0.0131561	0.0481459	0	0	0.0175879	0.0329968	0	0.0307184	0.0408879	0	0.0686283	0	0.0140399	0.0104885	0.0550268	0.0279352	0
chr7	30550636	30562128	-	AC005154.1	circAC005154.6	circ23768	0.213617	0.333924			1	1	1	1	1	1					0	0	0	0.116874	0	0.011529	0	0.0334009	0.020615	0.0100817	0	0.051204	0.0789368	0.108328	0.0587249	0.0122966	0.0175879	0.0989905	0.0731628	0.0307184	0.020444	0.200663	0	0.0776933	0.0280798	0.0734198	0.0275134	0.0419027	0.0372622
chr7	31864942	31880860	-	PDE1C	circPDE1C	circ23789	0.0307545	0.91861			1	1	1	1	1	1	1	1	1	1	1	1	0	0.012986	0	0.011529	0	0	0.0824599	0.0201633	0.0270672	0.0307224	0.0131561	0	0.019575	0.0122966	0	0	0	0.0102395	0.0613319	0	0	0.0258978	0.0561596	0.0104885	0.0275134	0.0139676	0.0124207
chr7	33177591	33146242	+	BBS9	circBBS9	circ23809	0.140658	0.263967		down_Mturquoise	1	1	1	1	1	1	1	1	1	1	1	1	0.0138806	0.0649301	0	0.0576448	0.0124802	0.0501013	0.103075	0.0504083	0.153381	0.0921672	0.118405	0.0601824	0.019575	0.0737797	0.105527	0.0989905	0.0975504	0.0716763	0.122664	0.0859983	0.0915045	0.0258978	0.0842395	0.0629312	0.110054	0.0838055	0.0621036
chr7	33974784	33937289	+	BMPER	circBMPER	circ23832	0.31988	0.202224		down_Mturquoise	1	1	1	1	1	1					0	0	0.0416418	0.0779162	0.0492879	0.11529	0.062401	0.100203	0	0.030245	0.0360896	0.0204816	0.0526245	0.0361094	0	0	0.0175879	0.0164984	0.0243876	0.0409579	0.183996	0.0573322	0.0457522	0.0258978	0.0140399	0.0524427	0.0550268	0.0419027	0.0124207
chr7	35667434	35673278	-	HERPUD2	circHERPUD2	circ23844	-0.0397237	0.894142			1	1	1	1	1	1	1	1	1	1	1	1	0.0277612	0.012986	0	0.011529	0.0499208	0.0668018	0.0824599	0.030245	0.0631569	0.0921672	0.0657806	0.0842553	0.0978749	0.0368898	0.0703516	0.0824921	0.121938	0.0204789	0.245328	0.229329	0.160133	0.0258978	0.0280798	0.0629312	0.0825402	0.0419027	0.0124207
chr7	38219660	38207447	+	STARD3NL	circSTARD3NL	circ23864	0.071827	0.850268			1	1	1	1	1	1					0	0	0	0.0259721	0.0246439	0.011529	0	0	0.020615	0.0100817	0.00902241	0	0.0131561	0.0120365	0	0	0	0.0164984	0	0.0102395	0	0	0.0228761	0	0	0	0.0550268	0.0139676	0.0372622
chr7	40002031	39987599	+	CDK13	circCDK13	circ23880	0.0863767	0.481671			1	1	1	1	1	1			1	1	1	1	0.0694031	0	0.0739318	0.0345869	0.0748812	0	0.12369	0.0604899	0.0902241	0.051204	0.0920929	0.0722188	0.03915	0.0122966	0.0351758	0.0494953	0	0.0409579	0.183996	0.114664	0.0915045	0.0258978	0.112319	0.0629312	0.0825402	0.0419027	0
chr7	44647759	44645327	+	OGDH	circOGDH	circ23937	0.163199	0.183585			1	1	1	1	1	1	1	1	1	1	1	1	0.0277612	0.116874	0.0492879	0.0691737	0.0748812	0.0835022	0.061845	0.0100817	0.126314	0.051204	0.0394684	0.132401	0.1566	0.0245932	0.105527	0.0989905	0.0731628	0.0614368	0.0408879	0.171997	0.0915045	0	0.0842395	0.0734198	0	0.139676	0.0248414
chr7	66286709	66240325	+	TPST1	circTPST1_1	circ24028	-0.29416	0.289352		down_Mturquoise	1	1	1	1	1	1			1	1	1	1	0	0.0389581	0.172508	0.011529	0.0748812	0	0.04123	0.0705716	0	0.0921672	0.118405	0.0722188	0.0587249	0.0122966	0.105527	0.0824921	0.0487752	0.0716763	0	0.0573322	0.183009	0.0517955	0.0842395	0.0734198	0.0550268	0.0279352	0
chr7	66286709	66286511	+	TPST1	circTPST1_2	circ24029	0.0210597	0.854348			1	1	1	1	1	1					0	0	0.0277612	0.0389581	0	0	0.0249604	0.0167004	0.0824599	0.0403266	0.0270672	0.051204	0.0526245	0.0240729	0.019575	0.0122966	0.0175879	0.0164984	0	0.0102395	0.0408879	0.0573322	0.0457522	0.0776933	0	0.0419542	0	0.0139676	0.0248414
chr7	73687095	73686636	+	BUD23	circWBSCR22	circ24081	-0.130665	0.454989			1	1	1	1	1	1			1	1	1	1	0.0277612	0	0	0	0	0	0	0.0201633	0.0451121	0.0307224	0.0131561	0	0	0	0.0175879	0.0329968	0.0487752	0.0204789	0.0408879	0.0286661	0	0	0.0280798	0.0104885	0	0	0
chr7	78160025	78185670	-	MAGI2	circMAGI2_1	circ24176	-0.379258	0.165675		down_Mturquoise	1	1	1	1	1	1			1	1	1	1	0.0138806	0	0.0492879	0.011529	0.0124802	0	0.020615	0.030245	0.00902241	0.051204	0.0526245	0.0361094	0.019575	0	0.0351758	0.0329968	0	0	0.122664	0.0573322	0.0686283	0	0.0140399	0	0.0275134	0.0279352	0.0124207
chr7	78343778	78346043	-	MAGI2	circMAGI2_2	circ24182	-0.160325	0.546747			1	1	1	1	1	1			1	1	1	1	0.0277612	0.0259721	0.147864	0.0230579	0.0374406	0.0668018	0.04123	0.0504083	0.0270672	0.051204	0.0263123	0.0962918	0	0.0122966	0.0879395	0.0989905	0	0.0409579	0.020444	0.171997	0.0686283	0.0258978	0.0280798	0.0524427	0.0550268	0.0419027	0.0496829
chr7	90984241	90917601	+	CDK14	circCDK14	circ24309	-0.509212	0.295337		down_Mturquoise	1	1	1	1	1	1			1	1	1	1	0.0277612	0	0	0	0.0124802	0	0	0.0100817	0.00902241	0.0204816	0	0.0120365	0	0	0.0527637	0.0164984	0.0243876	0	0.020444	0	0.0228761	0	0	0.0104885	0	0.0279352	0.0124207
chr7	92307656	92294889	+	ANKIB1	circANKIB1_1	circ24340	-0.130096	0.696093			1	1	1	1	1	1			1	1	1	1	0	0.012986	0	0.011529	0.0249604	0	0.04123	0.0201633	0.00902241	0.0204816	0	0	0	0.0245932	0.0527637	0.0164984	0	0.0102395	0.0613319	0.0573322	0.137257	0	0.0140399	0	0.0550268	0	0.0496829
chr7	92319512	92294889	+	ANKIB1	circANKIB1_2	circ24341	-0.27241	0.161498		down_Mturquoise	1	1	1	1	1	1			1	1	1	1	0.0694031	0.0519441	0.0985758	0	0.0499208	0.0334009	0.04123	0.0100817	0	0.0716856	0.105249	0.0481459	0	0	0.123115	0	0	0.0307184	0.122664	0.0286661	0.114381	0	0.0421197	0.0104885	0	0.0698379	0.0124207
chr7	92327900	92294889	+	ANKIB1	circANKIB1_3	circ24342	-0.27193	0.25249			1	1	1	1	1	1			1	1	1	1	0.0694031	0	0.0492879	0.0345869	0.0499208	0.0835022	0	0	0.0992465	0	0	0.0601824	0.0587249	0.0122966	0.0527637	0	0.0243876	0	0.0613319	0.229329	0	0.0776933	0.0842395	0.0419542	0.220107	0.0419027	0.0372622
chr7	92352642	92294889	+	ANKIB1	circANKIB1_4	circ24345	-0.459408	0.123137		down_Mturquoise	1	1	1	1	1	1			1		1	0	0.0138806	0.0259721	0.0246439	0	0	0.0334009	0.061845	0.0201633	0.0812017	0.0102408	0.0263123	0.0240729	0.03915	0	0.0175879	0	0	0.0307184	0.020444	0.0286661	0.0686283	0.0776933	0.0140399	0.0524427	0.0550268	0.0139676	0.0124207
chr7	98194572	98190728	+	LMTK2	circLMTK2_1	circ24418	-0.0289446	0.914669			1	1	1	1	1	1			1	1	1	1	0.0277612	0.012986	0.0492879	0.011529	0.0374406	0.0167004	0.103075	0.0806532	0.0180448	0.051204	0.0263123	0	0.019575	0.0245932	0.0351758	0.0164984	0.0487752	0.0204789	0	0	0	0	0.0280798	0.0104885	0	0.0838055	0.0372622
chr7	98194572	98191614	+	LMTK2	circLMTK2_2	circ24419	-0.176915	0.720997			1	1	1	1	1	1			1		1	0	0.0138806	0.0259721	0.0246439	0	0.0124802	0	0.061845	0.0504083	0.0270672	0.051204	0	0.0722188	0	0	0	0	0	0.0102395	0.020444	0	0.0228761	0	0	0.0629312	0.0275134	0	0
chr7	100024307	100023419	+	ZKSCAN1	circZKSCAN1	circ22891	0.217357	0.242379		up_Mdarkred	1	1	1	1	1	1	1	1	1	1	1	1	0.0416418	0.0519441	0.0492879	0.0461158	0.0499208	0.0167004	0	0.0604899	0.0360896	0.0614448	0.0263123	0.0601824	0.03915	0	0.0703516	0.0989905	0	0.0409579	0.143108	0.0859983	0.114381	0.0258978	0.0421197	0.0314656	0.0550268	0.0419027	0.0621036
chr7	103103051	103128792	-	NAPEPLD	circNAPEPLD	circ22924	-0.120949	0.816385			1	1	1	1	1	1					0	0	0	0	0.0492879	0	0.0124802	0.0167004	0.020615	0.0201633	0.00902241	0.0102408	0.0263123	0	0	0	0.0351758	0.0164984	0	0.0102395	0.020444	0.0286661	0.0686283	0.0258978	0.0140399	0.0104885	0.110054	0	0
chr7	104161072	104204234	-	ORC5	circORC5_1	circ22943	-0.00370495	0.901632		down_Mturquoise	1	1	1	1	1	1					0	0	0.0416418	0.0259721	0	0	0.0249604	0	0.020615	0.0201633	0.0180448	0.0204816	0.0263123	0.0120365	0	0.0245932	0	0.0659937	0	0	0.0613319	0.0286661	0.0228761	0	0.0280798	0.0209771	0.0275134	0.0139676	0
chr7	104188251	104204234	-	ORC5	circORC5_2	circ22948	0.111958	0.914152			1	1	1	1	1	1	1	1			1	1	0	0	0.0492879	0	0.0124802	0	0	0.0100817	0.00902241	0.0204816	0	0	0.019575	0.0122966	0.0175879	0.0329968	0.0243876	0	0	0.0573322	0.0686283	0	0.0421197	0.0314656	0	0	0
chr7	105041023	105038126	+	KMT2E	circKMT2E_1	circ22951	-0.14778	0.449893			1	1	1	1	1	1			1	1	1	1	0.0555224	0	0	0	0	0	0	0.0201633	0	0.0204816	0.0394684	0.0120365	0	0.0245932	0.0175879	0	0	0.0102395	0	0.0286661	0	0.0517955	0.0140399	0.0209771	0	0	0
chr7	105077433	105073619	+	KMT2E	circKMT2E_2	circ22955	0.229262	0.181416			1	1	1	1	1	1					0	0	0.0555224	0	0.172508	0.0691737	0.0374406	0	0.020615	0.0201633	0.0270672	0.0102408	0.0657806	0.0842553	0.0978749	0.0368898	0.0175879	0	0.0243876	0.0204789	0.10222	0.114664	0	0.0258978	0.0140399	0.0734198	0.0550268	0.153643	0
chr7	105081797	105073619	+	KMT2E	circKMT2E_3	circ22961	-0.2442	0.482947		up_Mdarkred	1	1	1	1	1	1					0	0	0	0.012986	0.0246439	0	0	0	0	0.0705716	0.0270672	0.0307224	0	0.0240729	0.019575	0.0245932	0	0.0329968	0	0.0102395	0.0613319	0	0	0	0	0	0	0.0698379	0
chr7	105091314	105066727	+	KMT2E	circKMT2E_4	circ22965	-0.662454	0.0391633	down	down_Mturquoise	1	1	1	1	1	1					0	0	0.0555224	0	0.0492879	0.0345869	0.0374406	0	0	0.0504083	0.0270672	0.0102408	0.105249	0	0.019575	0	0.0351758	0	0.0243876	0	0	0.0859983	0.0686283	0	0.0842395	0.0524427	0.0275134	0.0419027	0.0248414
chr7	111935540	111945798	-	DOCK4	circDOCK4	circ23056	0.282491	0.255088			1	1	1	1	1	1			1	1	1	1	0.0416418	0.0259721	0.0739318	0	0	0.0167004	0.020615	0.030245	0.0541345	0.0307224	0.0263123	0.0722188	0.03915	0.0122966	0	0.0494953	0.0975504	0.0204789	0.10222	0.0573322	0.0228761	0.0517955	0	0	0.0275134	0.0698379	0.0372622
chr7	122113118	122133741	-	AASS	circAASS	circ23092	0.15915	0.384527			1	1	1	1	1	1			1	1	1	1	0	0.012986	0.0246439	0	0	0.0167004	0.04123	0.0201633	0.0451121	0	0.0263123	0.0240729	0.03915	0	0	0.0164984	0	0	0.0613319	0.0286661	0	0	0.0280798	0.0419542	0	0	0.0372622
chr7	127373342	127377329	-	ZNF800	circZNF800	circ23164	-0.195381	0.538646			1	1	1	1	1	1	1	1	1	1	1	1	0.0555224	0.0259721	0.0246439	0.011529	0.0249604	0.0501013	0.04123	0.0403266	0.0631569	0.0204816	0.0920929	0.0361094	0.019575	0.0491865	0.0703516	0.0164984	0	0.0102395	0.10222	0.0573322	0.0915045	0.0258978	0.126359	0.0209771	0.0550268	0.0139676	0.0248414
chr7	127721400	127704839	+	SND1	circSND1	circ23168	0.479551	0.0848789		up_Mdarkred	1	1	1	1	1	1			1		1	0	0.0277612	0	0	0.011529	0.0124802	0	0.020615	0.0100817	0.0360896	0.0204816	0.0526245	0.0240729	0	0.0245932	0.0175879	0.0329968	0	0	0.020444	0.0286661	0.0228761	0	0.0280798	0.0419542	0	0.0279352	0
chr7	129014979	129018157	-	TNPO3	circTNPO3	circ23179	0.415566	0.0966806			1	1	1	1	1	1	1	1	1	1	1	1	0.0416418	0.012986	0.0246439	0	0.0249604	0.0501013	0.020615	0.0100817	0.0180448	0.0102408	0.0263123	0.0361094	0.11745	0.0122966	0	0.0329968	0.0731628	0.0102395	0.0613319	0.0859983	0	0.0258978	0.0280798	0.0629312	0	0.097773	0.0248414
chr7	130122202	130120749	+	KLHDC10	circKLHDC10	circ23201	0.381716	0.298675			1	1	1	1	1	1					0	0	0.0138806	0.0259721	0.0246439	0.011529	0	0.0334009	0.04123	0	0	0	0.0131561	0.0361094	0	0.0122966	0.0175879	0	0.0243876	0	0.0408879	0.0859983	0.0228761	0	0.0140399	0.0104885	0	0	0
chr7	137251230	137254974	-	PTN	circPTN	circ23261	-0.0828052	0.491602			1	1	1	1	1	1	1	1			1	1	0.0138806	0.0389581	0	0.0345869	0.0124802	0	0.020615	0	0.0180448	0.0102408	0	0	0.019575	0	0.0175879	0.0164984	0.0243876	0.0204789	0	0.0573322	0	0.0258978	0	0.0104885	0	0	0
chr7	137463489	137609609	-	DGKI	circDGKI	circ23275	-0.358531	0.321317			0	0	1	1	1	1			1	1	1	1	0.0416418	0.0779162	0.246439	0.011529	0.0249604	0.0167004	0.020615	0.0403266	0.108269	0.051204	0.0263123	0.0361094	0.019575	0.0122966	0.0527637	0.0164984	0	0	0.0817759	0.0859983	0.160133	0.0517955	0.0842395	0.0629312	0.0825402	0	0.0124207
chr7	140355668	140358785	-	SLC37A3	circSLC37A3	circ23364	0.327436	0.436276			1	1	1	1	1	1					0	0	0	0	0	0.011529	0	0.0167004	0.020615	0	0	0.0102408	0.0131561	0.0120365	0.019575	0	0.0175879	0.0824921	0.0487752	0.0102395	0.020444	0.0859983	0.0915045	0.0517955	0	0.0314656	0.0550268	0.0139676	0.0496829
chr7	140704963	140702866	+	NDUFB2	circNDUFB2	circ23370	-0.0221275	0.990251		down_Mturquoise	1	1	1	1	1	1			1		1	0	0.0277612	0	0.0492879	0.0230579	0.0249604	0	0	0.0403266	0.00902241	0.0102408	0	0.0240729	0	0	0	0.0164984	0	0	0	0	0	0	0	0.0209771	0	0	0
chr7	140776912	140794467	-	BRAF	circBRAF	circ23376	0.0911955	0.748009			1	1	1	1	1	1	1	1	1	1	1	1	0.0138806	0.0259721	0.0246439	0.0345869	0.0374406	0	0	0.0100817	0	0.0102408	0	0.0120365	0	0	0.0703516	0.0164984	0	0.0102395	0.0408879	0.0859983	0.0228761	0.0517955	0.0140399	0.0209771	0.0275134	0	0
chr7	152309966	152315338	-	KMT2C	circKMT2C	circ23504	0.1981	0.560306			1	1	1	1	1	1			1	1	1	1	0.0277612	0	0	0	0.0249604	0.0167004	0.04123	0.0403266	0.0180448	0.0204816	0.0263123	0.0120365	0	0.0122966	0.0175879	0.0329968	0	0.0102395	0.0613319	0	0	0	0.0280798	0.0104885	0	0	0
chr7	155680908	155665175	+	RBM33	circRBM33_1	circ23519	0.0342476	0.763144		down_Mturquoise	1	1	1	1	1	1	1		1	1	1	1	0	0.0389581	0	0.0691737	0.0748812	0.100203	0.12369	0.0705716	0.0902241	0	0.184186	0.168511	0.0978749	0.0860763	0.158291	0.0494953	0.0487752	0.0614368	0.10222	0.171997	0.160133	0.0776933	0	0	0.0275134	0.125708	0.0124207
chr7	155680908	155672867	+	RBM33	circRBM33_2	circ23520	-0.206172	0.499753		down_Mturquoise	1	1	1	1	1	1			1		1	0	0.0555224	0	0.0739318	0.0230579	0	0	0.0824599	0.0201633	0.0180448	0.0102408	0.0657806	0.0240729	0	0.0245932	0.0175879	0.0494953	0	0.0409579	0.0408879	0.114664	0.114381	0.0517955	0.0421197	0.0104885	0.0275134	0	0.0124207
chr7	156724112	156826744	-	LMBR1	circLMBR1_1	circ23534	-0.507738	0.220188		down_Mturquoise	1	0	1	1	1	1			1	1	1	1	0.0971643	0	0.0246439	0.011529	0.124802	0	0	0.0504083	0.0541345	0.0307224	0	0.0120365	0.03915	0	0.0703516	0	0	0.0307184	0.0613319	0.0573322	0	0.0258978	0.112319	0.0839083	0	0.0279352	0.0124207
chr7	156756393	156826744	-	LMBR1	circLMBR1_2	circ23539	-0.15981	0.31894			1	1	1	1	1	1			1	1	1	1	0.0832837	0.012986	0	0.011529	0.0249604	0	0.04123	0.030245	0	0.0409632	0.0526245	0.0361094	0	0	0	0	0.0243876	0.0102395	0.0817759	0.0573322	0	0	0.0561596	0.0209771	0.0275134	0	0.0124207
chr7	156826605	156836885	-	LMBR1	circLMBR1_3	circ23546	0.185261	0.777693			1	1	1	1	1	1	1	1	1	1	1	1	0.0555224	0.012986	0.0246439	0.0230579	0.0374406	0.0334009	0.04123	0.0100817	0	0.0204816	0.0394684	0.0601824	0	0	0.0527637	0.0329968	0.0731628	0.0204789	0.122664	0.257995	0.0915045	0	0.0280798	0	0.0275134	0	0.0124207
chr7	158788004	158799072	-	ESYT2	circESYT2	circ23583	0.253628	0.276161			1	1	1	1	1	1			1	1	1	1	0.0277612	0	0.0246439	0.0230579	0.0249604	0.0501013	0	0.030245	0.0360896	0.0409632	0.0263123	0.0361094	0	0.0245932	0.0351758	0.0659937	0	0.0716763	0.0613319	0.0286661	0.0228761	0.0258978	0.0561596	0.0314656	0	0.0838055	0
chr8	10319989	10245104	+	MSRA	circMSRA	circ24483	0.217448	0.492055			1	1	1	1	1	1			1	1	1	1	0	0.0389581	0	0	0	0	0	0	0.0180448	0.0614448	0.0394684	0.0120365	0.0587249	0	0.0175879	0.0329968	0	0.0409579	0.0817759	0.0286661	0.0457522	0.0258978	0.0140399	0.0419542	0.0275134	0.0279352	0.0248414
chr8	15673836	15650697	+	TUSC3	circTUSC3	circ24915	0.178499	0.358571		down_Mturquoise	1	1	1	1	1	1	1	1	1	1	1	1	0.0832837	0.0389581	0.147864	0.011529	0.137282	0.0668018	0.12369	0.0604899	0	0.0716856	0.105249	0	0.176175	0.0614831	0.0879395	0.0659937	0.0243876	0.0511973	0.10222	0.200663	0.343142	0.0517955	0.112319	0.0629312	0.0550268	0.0279352	0.0372622
chr8	18799295	18804898	-	PSD3	circPSD3	circ24994	0.404987	0.0831277			1	1	1	1	1	1	1	1	1	1	1	1	0.0416418	0.012986	0	0.0691737	0.0124802	0.0167004	0.04123	0.0201633	0.0270672	0.0102408	0.0263123	0.0481459	0.0782999	0	0.0527637	0.164984	0.0975504	0.0204789	0.0408879	0.0573322	0.0228761	0	0	0.0524427	0.0825402	0	0.0248414
chr8	26583983	26581969	+	DPYSL2	circDPYSL2	circ25042	0.21058	0.187834			1	1	1	1	1	1			1	1	1	1	0.194329	0.116874	0.0739318	0.149876	0.0873614	0.0835022	0.16492	0.12098	0.0721793	0.184334	0.131561	0.192584	0.293625	0.0122966	0.140703	0.31347	0.0487752	0.174071	0.224884	0.143331	0.0686283	0.0776933	0.0421197	0.14684	0.0550268	0.097773	0.235994
chr8	28162078	28155942	+	ELP3	circELP3	circ25062	-0.343886	0.222			1	1	1	1	1	1					0	0	0.0416418	0	0	0	0.0124802	0	0	0.0201633	0	0	0.0131561	0	0.03915	0	0.0175879	0	0.0243876	0	0.0408879	0.0573322	0.0686283	0	0.0140399	0.0104885	0	0.0139676	0
chr8	28718207	28713457	+	EXTL3	circEXTL3	circ25072	-0.452861	0.121745		down_Mturquoise	1	1	1	1	1	1					0	0	0	0.012986	0	0	0	0	0.04123	0.0201633	0.0270672	0.0409632	0.0526245	0	0.03915	0.0122966	0	0.0164984	0	0.0204789	0.10222	0	0.0457522	0.0258978	0.0842395	0.0209771	0.0550268	0.0419027	0.0124207
chr8	37766355	37765526	+	PLPBP	circPROSC	circ25162	0.134513	0.610475			1	1	1	1	1	1			1	1	1	1	0.0138806	0.0519441	0.0739318	0.0576448	0.0748812	0.0835022	0.04123	0.0201633	0.0541345	0.0307224	0.0657806	0.120365	0.0587249	0.0245932	0.0175879	0.0494953	0	0.0409579	0.020444	0.143331	0.0457522	0.0258978	0.0561596	0.0629312	0.0550268	0.0698379	0.111787
chr8	38820635	38819522	+	TACC1	circTACC1	circ25195	-0.0924769	0.795298			1	1	1	1	1	1					0	0	0.0138806	0.012986	0	0.0230579	0.0124802	0	0	0	0.0360896	0.0102408	0	0.0120365	0.019575	0.0122966	0.0175879	0	0	0.0102395	0.020444	0.0286661	0.0228761	0.0258978	0.0280798	0.0104885	0	0	0.0248414
chr8	42943445	42906173	+	HOOK3	circHOOK3_1	circ25278	-0.332339	0.313477		down_Mturquoise	1	1	1	1	1	1					0	0	0.111045	0.0779162	0	0	0.0499208	0.0835022	0	0.0907349	0	0.0307224	0.0920929	0.0722188	0.0587249	0.0245932	0.123115	0	0.0243876	0.0921552	0.163552	0	0.183009	0.0517955	0.0421197	0.104885	0.110054	0.0698379	0.0248414
chr8	42964474	42957094	+	HOOK3	circHOOK3_2	circ25287	0.147461	0.618203			1	1	1	1	1	1					0	0	0.0138806	0	0.147864	0	0.0249604	0	0.020615	0.0201633	0	0.0716856	0.0131561	0	0.03915	0	0.0527637	0	0	0.0102395	0.0613319	0.0859983	0	0.103591	0.0140399	0.0209771	0	0	0
chr8	43018494	42906173	+	HOOK3	circHOOK3_3	circ25314	0.036451	0.875073			0	0	0	0	0	0					0	0	0.138806	0.103888	0.197152	0.0691737	0.174723	0.100203	0.16492	0.0504083	0.126314	0.215057	0.144717	0.144438	0.0978749	0.0368898	0.140703	0.0329968	0.146326	0.102395	0.20444	0.0573322	0.0915045	0.0258978	0.126359	0.136351	0.0275134	0.125708	0.0993658
chr8	47294030	47284028	+	SPIDR	circSPIDR_1	circ25329	0.328513	0.296699			1	0	1	1	1	1					0	0	0	0.0389581	0.0492879	0	0.0124802	0	0.04123	0.0201633	0.0180448	0.0409632	0.0131561	0	0.03915	0.0368898	0	0	0.0487752	0.0204789	0.0408879	0.0573322	0	0.0776933	0.0140399	0.0104885	0.0550268	0	0
chr8	47407961	47396376	+	SPIDR	circSPIDR_2	circ25333	-0.121651	0.784642			1	1	1	1	1	1					0	0	0.0277612	0.0259721	0	0	0.0499208	0.0167004	0	0.0201633	0.0541345	0	0.0131561	0.0240729	0.019575	0	0.0175879	0.0164984	0	0	0.143108	0.0286661	0	0	0.0421197	0.0314656	0.0550268	0.0838055	0.0124207
chr8	50450729	50438543	+	SNTG1	circSNTG1	circ25367	-0.433426	0.18036		down_Mturquoise	1	1	1	1	1	1			1	1	1	1	0	0.0519441	0.0985758	0.0230579	0.112322	0	0.0824599	0.0806532	0.108269	0.051204	0.0657806	0.0481459	0	0	0.0175879	0.0659937	0.0243876	0.0511973	0.327103	0.0573322	0.114381	0.0517955	0.0561596	0.0104885	0	0.0419027	0.0124207
chr8	51860845	51861246	-	PCMTD1	circPCMTD1	circ25406	-0.283819	0.241113			1	1	1	1	1	1			1	1	1	1	0.0555224	0	0.147864	0.0691737	0.0998416	0	0.103075	0.12098	0.0631569	0.102408	0.118405	0.156474	0.019575	0.0122966	0.105527	0.0659937	0.0731628	0.0716763	0.20444	0.429992	0.183009	0.129489	0.0842395	0.0314656	0.192594	0.0419027	0
chr8	60591969	60572046	+	RAB2A	circRAB2A_1	circ25472	-0.55251	0.0891461		down_Mturquoise	1	1	1	1	1	1			1	1	1	1	0	0.0259721	0.0492879	0	0	0	0	0.030245	0	0.0409632	0	0	0	0.0122966	0.0703516	0.0824921	0.0243876	0	0.20444	0	0	0	0.0561596	0	0	0	0.0621036
chr8	60591969	60584208	+	RAB2A	circRAB2A_2	circ25473	0.532632	0.125767		up_Mdarkred	1	1	1	1	1	1	1	1	1		1	1	0.0277612	0	0.0246439	0.011529	0.0249604	0	0	0	0.00902241	0.0102408	0.0263123	0.0120365	0	0	0	0	0	0.0204789	0	0	0.0457522	0	0.0421197	0.0314656	0.0275134	0.0279352	0
chr8	61618978	61653660	-	ASPH	circASPH_1	circ25503	0.690752	0.00090724	up		1	1	1	1	1	1					0	0	0.0694031	0.0909022	0.0985758	0.0576448	0.062401	0	0.144305	0.0806532	0.126314	0.0921672	0.144717	0.132401	0.137025	0.0614831	0.0527637	0	0.0243876	0.0614368	0.143108	0.401326	0	0.129489	0	0.0734198	0.0825402	0.153643	0.0496829
chr8	61680968	61684188	-	ASPH	circASPH_2	circ25513	0.0335995	0.724847			1	0	1	1	1	1			1	1	1	1	0.0277612	0.0259721	0	0.0461158	0.0124802	0	0.020615	0.0201633	0.0360896	0.0307224	0.0526245	0.0361094	0.11745	0.0122966	0.0175879	0.0329968	0	0.0409579	0.183996	0.0573322	0.0686283	0.0258978	0.0421197	0.0314656	0.0550268	0.0139676	0.0124207
chr8	68060779	68022036	+	PREX2	circPREX2	circ25601	0.635878	0.111061			1	1	1	1	1	1			1		1	0	0.0416418	0	0.0246439	0.0345869	0.0124802	0	0	0.0100817	0	0	0.0131561	0	0.03915	0	0.0175879	0.0824921	0.0243876	0.0102395	0	0.0286661	0.0228761	0	0.0280798	0.0209771	0	0	0
chr8	70159505	70162854	-	NCOA2	circNCOA2_1	circ25624	0.157335	0.944878			1	1	1	1	1	1					0	0	0.0277612	0	0.0739318	0.011529	0	0	0	0.0100817	0	0.0307224	0.0657806	0.0361094	0.019575	0	0.0351758	0	0	0.0102395	0.0408879	0.0286661	0.0915045	0	0.0421197	0	0.0275134	0	0
chr8	70213903	70216764	-	NCOA2	circNCOA2_2	circ25626	0.348433	0.11182			1	1	1	1	1	1	1	1	1	1	1	1	0	0	0	0.011529	0.0124802	0.0501013	0.020615	0.0100817	0.0180448	0.0204816	0.0657806	0.0361094	0.03915	0.0245932	0	0.0329968	0.0243876	0.0102395	0	0	0.0457522	0	0.0280798	0.0314656	0.0275134	0.0279352	0
chr8	73673107	73688813	-	STAU2	circSTAU2	circ25655	-0.46808	0.052047		down_Mturquoise	1	1	1	1	1	1	1	1	1	1	1	1	0.0138806	0	0.0492879	0.011529	0.0374406	0	0	0	0	0.0409632	0.0263123	0	0.019575	0	0	0	0	0.0307184	0.0613319	0	0	0.0776933	0	0.0314656	0	0	0
chr8	74244529	74245175	-	JPH1	circJPH1	circ25661	-0.00562832	0.748715			1	1	1	1	1	1	1	1	1	1	1	1	0.0138806	0.0519441	0.0492879	0.0230579	0.0374406	0	0	0.0201633	0.00902241	0.0102408	0	0.0361094	0.0587249	0	0.0351758	0	0.0243876	0.0409579	0.020444	0.0573322	0.0228761	0	0	0.0104885	0	0.0139676	0.0124207
chr8	89722015	89725641	-	AF117829.1	circRP11-37B2.1	circ25710	0.183671	0.433809			1	1	1	1	1	1					0	0	0	0.116874	0.0985758	0	0.0374406	0	0.04123	0.0604899	0.0180448	0.0409632	0.0526245	0.156474	0.0587249	0.0122966	0.0527637	0.115489	0.121938	0.0204789	0.0408879	0.0573322	0.0457522	0	0	0.0734198	0.0825402	0.097773	0.0993658
chr8	100264034	100288267	-	RNF19A	circRNF19A	circ24445	-0.334873	0.514622			1	1	1	1	1	1					0	0	0	0.0259721	0.0246439	0	0.0124802	0	0	0	0	0	0	0.0601824	0.019575	0	0.0351758	0	0	0	0	0	0	0	0.0280798	0.0209771	0.0275134	0.0139676	0
chr8	102360071	102361626	-	UBR5	circUBR5	circ24470	0.218839	0.46834			1	1	1	1	1	1	1	1	1		1	1	0.0416418	0.012986	0.0492879	0.011529	0.0124802	0	0.04123	0.0201633	0.00902241	0.0102408	0.0789368	0.0481459	0.0587249	0.0122966	0	0	0	0.0204789	0.020444	0.0859983	0.0457522	0.0258978	0.0280798	0	0	0	0
chr8	103886223	103885298	+	RIMS2	circRIMS2_1	circ24489	-0.398849	0.176893			1	1	1	1	1	1	1	1	1	1	1	1	0	0.012986	0	0.011529	0	0	0.020615	0.0403266	0.00902241	0	0.0263123	0.0240729	0	0	0.0175879	0.0164984	0	0	0.0817759	0	0.0228761	0	0.0280798	0.0104885	0.0275134	0	0.0124207
chr8	104148848	104068512	+	RIMS2	circRIMS2_2	circ24542	0.177668	0.229591			1	1	1	1	1	1	1	1	1	1	1	1	0.291493	0.259721	0.542167	0.149876	0.224644	0.133604	0.16492	0.231878	0.198493	0.112649	0	0.637933	0.3915	0	0.404522	0.428959	0	0.153592	0	0.601988	0.571903	0.336671	0	0.220259	0.522754	0	0
chr8	104148848	104093471	+	RIMS2	circRIMS2_3	circ24543	-0.184276	0.778315			1	1	1	1	1	1	1	1	1	1	1	1	0.0416418	0.0259721	0	0.0230579	0.0499208	0.0334009	0.04123	0	0.0541345	0.0102408	0.0657806	0.0481459	0	0.0122966	0	0.0329968	0.0487752	0.0204789	0.10222	0.0286661	0.0457522	0	0.0140399	0.0314656	0	0.0698379	0.0248414
chr8	105444381	105419144	+	ZFPM2	circZFPM2	circ24546	-0.173536	0.491546			1	1	1	1	1	1	1	1	1	1	1	1	0.0416418	0.0909022	0	0.0230579	0.0124802	0.0668018	0.0824599	0.030245	0.0180448	0	0.0526245	0.0601824	0.03915	0	0.0175879	0.0989905	0.0731628	0.0204789	0	0	0.0457522	0	0.0140399	0.115374	0.0275134	0.0419027	0.0124207
chr8	108455930	108449823	+	EMC2	circEMC2	circ24562	0.381324	0.11431			1	1	1	1	1	1					0	0	0.0138806	0.0519441	0.0739318	0.0345869	0.0124802	0.150304	0.020615	0.0403266	0.0270672	0.0102408	0.0131561	0.132401	0.1566	0.0122966	0	0.0989905	0.219488	0.0511973	0.10222	0.171997	0	0.0517955	0.0842395	0.0419542	0.16508	0.125708	0.0372622
chr8	112921627	112976148	-	CSMD3	circCSMD3	circ24585	-0.0346037	0.86474			1	1	1	1	1	1	1	1	1	1	1	1	0	0.0259721	0	0	0.0124802	0	0.020615	0.030245	0.0180448	0.0102408	0.0394684	0.0240729	0.019575	0	0	0.0659937	0	0.0102395	0.020444	0	0	0	0.0140399	0.0209771	0.0550268	0.0419027	0
chr8	115587001	115623758	-	TRPS1	circTRPS1	circ24597	0.113985	0.942582			1	1	1	1	1	1					0	0	0	0	0.0246439	0	0.0374406	0	0	0.0100817	0	0.0102408	0.0131561	0.0240729	0.019575	0	0	0.0494953	0	0.0409579	0.0613319	0	0	0	0.0140399	0.0104885	0.0275134	0	0
chr8	130152736	130169067	-	ASAP1	circASAP1_1	circ24687	0.285236	0.329843			1	1	1	1	1	1					0	0	0.0416418	0.0519441	0	0.011529	0.062401	0.0334009	0	0.030245	0.00902241	0.0716856	0.0526245	0.0722188	0.03915	0.0368898	0.0703516	0.148486	0.170713	0.0716763	0.0613319	0.315327	0.0686283	0.0776933	0.0701996	0.0839083	0.0825402	0.097773	0.0745243
chr8	130152736	130180880	-	ASAP1	circASAP1_2	circ24688	-0.0497653	0.784615		down_Mturquoise	1	1	1	1	1	1			1		1	0	0.0555224	0.142846	0	0	0.162243	0.0668018	0.103075	0.100817	0.0902241	0.174094	0.210498	0.132401	0.0782999	0.0614831	0.123115	0.21448	0.0975504	0.112634	0.183996	0.171997	0	0.0517955	0.196559	0.0734198	0.137567	0.167611	0.0993658
chr8	132622611	132661627	-	LRRC6	circLRRC6	circ24733	-0.109111	0.870254			1	1	1	1	1	1					0	0	0.0138806	0.012986	0	0	0.0998416	0.0334009	0.12369	0.030245	0.0541345	0.0614448	0.0789368	0.0361094	0	0	0.0527637	0	0.0243876	0.0102395	0.10222	0.0859983	0.0686283	0	0.0280798	0	0.0550268	0.0139676	0.0248414
chr8	135582073	135542654	+	KHDRBS3	circKHDRBS3	circ24759	-0.117006	0.573574			1	1	1	1	1	1	1	1	1	1	1	1	0.0694031	0.012986	0.0985758	0	0	0	0	0.030245	0.0180448	0	0	0.0361094	0	0.0122966	0.0351758	0.0824921	0.0243876	0.0307184	0.0613319	0.114664	0.0228761	0.0517955	0	0.0314656	0.0550268	0.0419027	0.0248414
chr8	140700891	140706205	-	PTK2	circPTK2_1	circ24800	0.51276	0.169278			1	1	1	1	1	1			1		1	0	0	0.0649301	0.0246439	0	0	0.0835022	0.020615	0.030245	0	0	0	0.0120365	0.019575	0	0	0	0.0487752	0	0	0.0573322	0.0228761	0	0	0.0734198	0	0.0838055	0
chr8	140739018	140752316	-	PTK2	circPTK2_2	circ24826	0.271775	0.271218			1	1	1	1	1	1	1	1	1	1	1	1	0.0555224	0.0909022	0.12322	0.149876	0.0499208	0.38411	0.04123	0.0403266	0.0812017	0.0614448	0.0131561	0.108328	0.1566	0.0122966	0.0175879	0.181483	0.146326	0.0102395	0	0.315327	0.0457522	0.0517955	0.0561596	0.157328	0.0825402	0.237449	0.198732
chr8	140818277	140879637	-	PTK2	circPTK2_3	circ24879	0.104807	0.916098			1	1	1	1	1	1			1	1	1	1	0.0416418	0.012986	0	0	0	0.0334009	0	0.0100817	0.0360896	0.0102408	0.0263123	0	0	0	0	0.0494953	0.0243876	0.0102395	0.020444	0.0573322	0.0228761	0.0517955	0.0140399	0	0	0.0139676	0
chr8	140818277	140890769	-	PTK2	circPTK2_4	circ24880	-0.028816	0.887923			1	1	1	1	1	1	1	1	1	1	1	1	0.0416418	0.0649301	0	0.011529	0.0249604	0.0167004	0.0824599	0.030245	0.0270672	0.0204816	0.0789368	0.0240729	0.0587249	0.0122966	0	0.0659937	0.0487752	0.0102395	0.245328	0.0286661	0.0457522	0.103591	0.0421197	0.0314656	0.0275134	0.0558703	0
chr8	140846260	140890769	-	PTK2	circPTK2_5	circ24890	-0.19077	0.53497		down_Mturquoise	1	1	1	1	1	1	1	1	1	1	1	1	0.0555224	0	0.0246439	0.011529	0.0499208	0	0.04123	0	0.0631569	0	0.0131561	0.0240729	0	0.0491865	0.0351758	0.0659937	0.0487752	0.0409579	0.143108	0.0573322	0.0915045	0	0.0561596	0	0.0550268	0.0419027	0.0248414
chr8	140879471	140890769	-	PTK2	circPTK2_6	circ24895	0.0954145	0.430961			1	1	1	1	1	1	1	1	1	1	1	1	0.0694031	0.0389581	0.0739318	0.011529	0.062401	0.0501013	0.04123	0.0201633	0.0812017	0.0614448	0.0131561	0.0361094	0.019575	0.0245932	0.0703516	0	0.121938	0.0409579	0.0613319	0.0286661	0.160133	0.0517955	0.0701996	0.0419542	0.0550268	0.0698379	0
chr8	141253989	141254629	-	SLC45A4	circSLC45A4	circ24900	-0.209313	0.279779			1	1	1	1	1	1	1	1	1	1	1	1	0.333135	0.467497	0.271083	0.242108	0.237124	0.150304	0.185535	0.231878	0.469165	0.163853	0.460464	0.469422	0.35235	0.0614831	0.281406	0.808423	0.243876	0.153592	0.531543	0.458658	0.274513	0.362569	0.196559	0.419542	0.412701	0.656476	0.211152
chr9	5968019	5988545	-	KIAA2026	circKIAA2026	circ26647	-0.268758	0.208258		down_Mturquoise	1	1	1	1	1	1	1	1	1	1	1	1	0.0694031	0.0259721	0.12322	0.011529	0.062401	0	0.061845	0.0907349	0.0812017	0.0204816	0.0263123	0.0842553	0.03915	0.0245932	0.123115	0	0	0.0102395	0.224884	0.0573322	0.0228761	0.0517955	0.112319	0.0314656	0.0275134	0.0698379	0.0248414
chr9	6893232	6880012	+	KDM4C	circKDM4C	circ26660	-0.169333	1			1	1	1	1	1	1	1	1	1	1	1	1	0.0277612	0.0649301	0.0985758	0.0576448	0.0374406	0.0668018	0.04123	0.0504083	0.0180448	0.0204816	0.0394684	0.0601824	0.0587249	0.0245932	0.0527637	0.115489	0.0731628	0.0409579	0.020444	0.286661	0	0.0776933	0.112319	0.0314656	0	0.0698379	0.0621036
chr9	14146689	14179780	-	NFIB	circNFIB	circ26326	-0.179869	0.429983			1	1	1	1	1	1	1	1	1	1	1	1	0.0138806	0.012986	0.0492879	0.011529	0.0249604	0	0.020615	0	0.0180448	0.0102408	0.0131561	0.0120365	0.019575	0	0.0351758	0.0164984	0	0	0.0613319	0.0573322	0	0.0258978	0	0	0.0275134	0.0139676	0.0248414
chr9	14639896	14680162	-	ZDHHC21	circZDHHC21	circ26331	-0.136971	0.451652			1	1	1	1	1	1	1	1	1	1	1	1	0.0971643	0	0.246439	0.0807027	0.124802	0.0167004	0.103075	0.110898	0.0902241	0.0307224	0.105249	0.144438	0.0782999	0.0245932	0.175879	0.0494953	0.0487752	0	0.245328	0.315327	0.228761	0.181284	0	0.0524427	0.16508	0.0558703	0.0248414
chr9	20770238	20715322	+	FOCAD	circFOCAD_1	circ26415	0.036352	0.716547			1	1	1	1	1	1					0	0	0	0	0.147864	0.0230579	0.0124802	0	0	0.0100817	0.00902241	0	0.0131561	0	0	0.0122966	0.0175879	0.0494953	0	0	0.0408879	0.0573322	0	0.0776933	0.0140399	0.0419542	0	0	0.0124207
chr9	20789608	20715322	+	FOCAD	circFOCAD_2	circ26422	-0.239397	0.403404			1	1	1	1	1	1			1		1	0	0.0277612	0.012986	0.0246439	0.011529	0	0.0668018	0	0.030245	0.0180448	0	0.0263123	0	0	0	0.0351758	0.0329968	0.0243876	0.0102395	0.0817759	0.0859983	0.0228761	0.0517955	0.0280798	0.0209771	0.137567	0.0139676	0
chr9	20874807	20819796	+	FOCAD	circFOCAD_3	circ26431	-0.124729	0.489538			1	1	1	1	1	1			1	1	1	1	0.0277612	0	0.0985758	0.011529	0.0124802	0.0167004	0.020615	0.030245	0.0180448	0.0409632	0	0.0240729	0.03915	0	0.0527637	0.0329968	0	0.0102395	0	0.0573322	0.0915045	0.0517955	0	0	0.0550268	0.0139676	0.0124207
chr9	20916937	20907150	+	FOCAD	circFOCAD_4	circ26442	0.200509	0.590737			1	1	1	1	1	1					0	0	0.0277612	0	0	0	0.0124802	0	0	0.0201633	0.0270672	0.0204816	0.0131561	0.0240729	0.0782999	0	0.0175879	0	0	0	0.0613319	0.0573322	0	0.0258978	0.0140399	0.0104885	0	0.0279352	0.0124207
chr9	20933103	20923660	+	FOCAD	circFOCAD_5	circ26448	-0.500873	0.106199		down_Mturquoise	1	1	1	1	1	1					0	0	0.0138806	0	0.0492879	0.011529	0.0249604	0	0.04123	0.0403266	0	0.0204816	0.0263123	0.0361094	0	0.0122966	0.0527637	0.0329968	0	0	0.0817759	0.0286661	0.0457522	0.0517955	0.0280798	0.0419542	0.0275134	0	0.0124207
chr9	23762006	23765099	-	ELAVL2	circELAVL2	circ26468	-0.22306	0.650968			1	1	1	1	1	1	1	1	1	1	1	1	0	0	0.0246439	0.011529	0.0249604	0	0.0824599	0.0100817	0	0	0.0131561	0.0120365	0.019575	0	0.0351758	0.0824921	0.0243876	0.0307184	0	0.0859983	0.0228761	0	0	0	0.0275134	0.0139676	0
chr9	33953285	33963791	-	UBAP2	circUBAP2_1	circ26527	0.096862	0.878999			1	1	1	1	1	1					0	0	0.0138806	0	0.0492879	0.0345869	0	0.0668018	0	0.0100817	0.0270672	0.0204816	0.0263123	0.0240729	0	0	0.0175879	0.0164984	0.0243876	0.0204789	0.143108	0.114664	0.0457522	0.0258978	0	0.0419542	0.0275134	0.0279352	0.0248414
chr9	33971651	33973237	-	UBAP2	circUBAP2_2	circ26539	0.628449	0.00751936	up		1	1	1	1	1	1					0	0	0.0277612	0.0649301	0.0246439	0.0807027	0.0249604	0.0167004	0.020615	0.0100817	0.0180448	0	0.0131561	0.0481459	0.0782999	0.0491865	0.0703516	0.0494953	0.0487752	0.0102395	0.020444	0.114664	0.0228761	0.0517955	0.0280798	0.0839083	0	0.097773	0.0124207
chr9	35548535	35546430	+	RUSC2	circRUSC2	circ26564	-0.125501	0.548089		down_Mviolet	1	1	1	1	1	1					0	0	0.0277612	0.012986	0	0.0230579	0.0124802	0	0.04123	0.0403266	0.0270672	0.0204816	0.0131561	0	0	0	0	0	0	0.0204789	0	0	0.0457522	0	0.0280798	0.0209771	0	0.0419027	0.0124207
chr9	37426654	37424845	+	GRHPR	circGRHPR	circ26602	-0.19154	0.325563			1	1	1	1	1	1					0	0	0.0832837	0.012986	0.0492879	0.0230579	0.0124802	0.0167004	0.12369	0.0705716	0.0721793	0.0204816	0.0394684	0.0842553	0.03915	0	0.0351758	0.0659937	0.0487752	0.0409579	0.0408879	0.229329	0.114381	0	0.0561596	0.0419542	0	0.0558703	0.0372622
chr9	74996447	75017448	-	CARNMT1	circCARNMT1_1	circ26713	-0.286853	0.150772			1	1	1	1	1	1			1	1	1	1	0.0416418	0	0	0.0230579	0.0124802	0	0.020615	0.0100817	0.00902241	0	0.0526245	0.0120365	0.019575	0	0	0.0164984	0.0243876	0.0307184	0.020444	0.0859983	0.0457522	0	0.0280798	0.0314656	0.0550268	0	0.0124207
chr9	75016268	75017448	-	CARNMT1	circCARNMT1_2	circ26714	0.208725	0.444831			1	1	1	1	1	1			1		1	0	0	0.0519441	0	0.0230579	0.0374406	0.0334009	0	0	0	0.0102408	0	0	0.019575	0	0.0351758	0.0329968	0	0.0102395	0.0408879	0.0286661	0.0228761	0.0517955	0.0140399	0	0.0275134	0.0139676	0
chr9	77227485	77214329	+	VPS13A	circVPS13A_1	circ26740	-0.3912	0.0769172		down_Mturquoise	1	1	1	1	1	1					0	0	0.0138806	0.012986	0.0492879	0.0230579	0.0249604	0.100203	0.04123	0.0201633	0.00902241	0.051204	0.0789368	0.0361094	0.03915	0.0122966	0.0351758	0.0164984	0.0243876	0.0307184	0.10222	0.0286661	0.114381	0	0.0140399	0.0209771	0.0275134	0.0419027	0
chr9	77407607	77381976	+	VPS13A	circVPS13A_2	circ26758	-0.263017	0.226886		down_Mturquoise	1	1	1	1	1	1					0	0	0.0138806	0.0259721	0.0246439	0.0345869	0.0124802	0.0167004	0	0.0403266	0	0	0	0.0361094	0	0	0	0.0164984	0	0	0.020444	0.0286661	0.0228761	0	0.0280798	0	0	0.0139676	0.0248414
chr9	79654075	79612656	+	TLE4	cirCTEL4	circ26764	-0.0718135	0.963308			1	0	1	0	1	0					0	0	0.0138806	0.012986	0.0246439	0	0	0	0.020615	0.0604899	0.0360896	0.051204	0	0.0361094	0.019575	0	0	0.0329968	0.0243876	0	0.0613319	0	0.0457522	0	0.0280798	0	0	0.0139676	0
chr9	83677727	83678599	-	UBQLN1	circUBQLN1_1	circ26779	-0.298038	0.173267			1	1	1	1	1	1					0	0	0	0.012986	0	0.0230579	0.0249604	0.0334009	0.020615	0.0100817	0.00902241	0.0204816	0	0.0361094	0.019575	0	0	0.0329968	0.0487752	0.0102395	0.0613319	0.0859983	0.0228761	0	0.0140399	0.0419542	0	0.0558703	0.0124207
chr9	83678441	83686155	-	UBQLN1	circUBQLN1_2	circ26782	0.312335	0.330278			1	1	1	1	1	1					0	0	0.0694031	0	0.197152	0	0.0748812	0	0.020615	0.0504083	0.0992465	0	0.0657806	0.0240729	0.019575	0.0368898	0.0703516	0	0	0.0511973	0.20444	0.114664	0.205885	0.0258978	0.126359	0	0	0	0
chr9	83679775	83686155	-	UBQLN1	circUBQLN1_3	circ26784	-0.402486	0.260233		down_Mturquoise	1	1	1	1	1	1					0	0	0	0	0.0246439	0	0.0124802	0	0.020615	0	0.00902241	0	0.0131561	0	0.019575	0	0.0351758	0.0329968	0	0	0.0408879	0.0286661	0	0.0258978	0.0140399	0.0104885	0.0275134	0.0139676	0
chr9	84710791	84702159	+	NTRK2	circNTRK2_1	circ26822	0.12816	0.223713			1	1	1	1	1	1	1	1	1	1	1	1	0.111045	0.0519441	0.12322	0.0691737	0.124802	0.0835022	0.103075	0.0806532	0.0631569	0	0.0394684	0.132401	0.0978749	0.0614831	0.0879395	0.0989905	0.0731628	0.0409579	0.265772	0.200663	0.137257	0.0517955	0.0421197	0.136351	0.0550268	0.0698379	0.0248414
chr9	84727959	84702159	+	NTRK2	circNTRK2_2	circ26824	0.363491	0.245799			1	1	1	1	1	1			1		1	0	0.0138806	0.012986	0	0.011529	0	0.0167004	0.020615	0.030245	0	0.0409632	0	0.0120365	0.0587249	0.0122966	0.0175879	0.0659937	0.0975504	0.0102395	0.020444	0.0859983	0.0228761	0	0	0.0104885	0.0275134	0	0.0496829
chr9	84752085	84710637	+	NTRK2	circNTRK2_3	circ26830	0.346885	0.20961		down_Mturquoise	1	1	1	1	1	1					0	0	0.0138806	0	0.0246439	0	0.0374406	0.0334009	0.020615	0	0.0180448	0	0	0.0120365	0.03915	0.0368898	0.0351758	0	0.0487752	0.0204789	0.020444	0.0286661	0.0457522	0.0258978	0	0	0.0825402	0.0279352	0.0124207
chr9	84752085	84741892	+	NTRK2	circNTRK2_4	circ26833	0.127151	0.492802			1	1	1	1	1	1			1		1	0	0.0555224	0.0389581	0	0.0691737	0.0374406	0.0501013	0.020615	0.0403266	0.0270672	0.0409632	0.0394684	0.0842553	0.11745	0.0245932	0	0.0164984	0.0243876	0.0409579	0.020444	0.0573322	0	0.0776933	0.0701996	0.0209771	0.0275134	0.0558703	0.0248414
chr9	85575315	85596449	-	AGTPBP1	circAGTPBP1_1	circ26857	0.393278	0.167517			1	1	1	1	1	1	1	1	1	1	1	1	0	0	0.0246439	0.011529	0	0.0334009	0.020615	0.0201633	0.0180448	0	0.0394684	0.0120365	0.03915	0	0.0175879	0.0164984	0	0	0.020444	0.0573322	0.0228761	0.0258978	0.0140399	0.0104885	0.0550268	0.0279352	0.0248414
chr9	85575315	85633374	-	AGTPBP1	circAGTPBP1_2	circ26859	-0.184266	0.452682			1	1	1	1	1	1			1		1	0	0.0277612	0.0389581	0	0.0230579	0.0499208	0.0167004	0.020615	0.030245	0.0180448	0.0409632	0	0.0601824	0	0.0245932	0.0175879	0	0.0243876	0.0307184	0	0.0286661	0.0915045	0.0258978	0.0140399	0.0104885	0.0275134	0.0139676	0.0248414
chr9	85585463	85633374	-	AGTPBP1	circAGTPBP1_3	circ26865	0.245966	0.167848			1	1	1	1	1	1					0	0	0.0416418	0	0	0.0461158	0.0249604	0.0501013	0.020615	0.030245	0.0631569	0.0307224	0.0131561	0.0240729	0.0978749	0.0368898	0.0351758	0	0.0731628	0	0.0408879	0	0	0.0258978	0.0701996	0.0629312	0.0825402	0.0419027	0
chr9	85596362	85633374	-	AGTPBP1	circAGTPBP1_4	circ26871	0.219007	0.47528		down_Mturquoise	1	1	1	1	1	1			1		1	0	0.0277612	0	0.0739318	0.0576448	0	0.0501013	0.04123	0.0201633	0	0.0409632	0	0	0.0587249	0.0368898	0.0175879	0	0	0	0.0817759	0	0	0.0258978	0	0.0839083	0	0	0.0248414
chr9	85618983	85633374	-	AGTPBP1	circAGTPBP1_5	circ26874	-0.0740159	0.774714			1	1	1	1	1	1	1	1	1	1	1	1	0	0.0259721	0	0	0.0124802	0.0334009	0	0	0.00902241	0.0102408	0.0394684	0.0120365	0.0587249	0	0.0351758	0.0329968	0	0	0.0408879	0.0286661	0.0915045	0	0.0140399	0	0	0.0279352	0
chr9	85669485	85712566	-	AGTPBP1	circAGTPBP1_6	circ26894	0.328465	0.305271		down_Mturquoise	1	1	1	1	1	1	1	1	1	1	1	1	0.0555224	0.0259721	0.0739318	0.011529	0.0249604	0.0334009	0.103075	0.030245	0.00902241	0.0204816	0	0.0240729	0.019575	0	0.0527637	0.0824921	0	0.0307184	0.0408879	0.0859983	0.183009	0.0776933	0	0.0104885	0	0.0279352	0.0248414
chr9	86305192	86310017	-	ZCCHC6	circZCCHC6	circ26916	0.0780204	0.877751			1	1	1	1	1	1					0	0	0	0	0	0	0.0124802	0	0.020615	0	0.00902241	0.0102408	0	0	0.019575	0	0.0175879	0.0494953	0.0243876	0.0204789	0.020444	0	0	0	0.0561596	0	0.0550268	0	0.0372622
chr9	93498886	93471141	+	FAM120A	circFAM120A	circ26946	0.129006	0.705766			1	1	1	1	1	1			1	1	1	1	0.0555224	0.012986	0	0	0.0249604	0.0167004	0	0.0504083	0.0631569	0.0409632	0.0131561	0	0	0	0.0175879	0	0.0487752	0.0307184	0.0408879	0.0573322	0.0686283	0	0	0.0419542	0.0825402	0.0279352	0
chr9	96004701	95978061	+	ERCC6L2	circERCC6L2	circ26970	-0.0263229	0.962029			1	1	1	1	1	1					0	0	0.0138806	0	0.0246439	0	0.0124802	0.0167004	0	0	0	0.0102408	0	0.0361094	0	0.0122966	0.0175879	0.0164984	0.0243876	0	0	0.0286661	0	0	0	0.0104885	0	0.0279352	0
chr9	96465778	96458379	+	HABP4	circHABP4	circ26976	-0.0499621	0.889654			1	1	1	1	1	1			1		1	0	0.0416418	0.0389581	0.0985758	0.0345869	0.0499208	0.0167004	0.04123	0.0100817	0.0180448	0	0.0131561	0	0.019575	0	0.0351758	0.0329968	0	0.0102395	0	0.0573322	0.0457522	0	0.0140399	0	0.0550268	0	0
chr9	98385640	98406141	-	GABBR2	circGABBR2	circ27009	-0.182563	0.560886		down_Mturquoise	1	1	1	1	1	1			1	1	1	1	0.0416418	0	0.0739318	0.011529	0	0	0	0.0100817	0	0	0.0526245	0.0120365	0.019575	0.0122966	0.123115	0	0	0.0307184	0.0817759	0.0286661	0.0228761	0	0	0.0314656	0	0.0139676	0.0248414
chr9	100516771	100498765	+	TMEFF1,MSANTD3-TMEFF1	circMSANTD3-TMEFF1_1	circ25828	0.334841	0.260736			1	1	1	1	1	1	1	1	1	1	1	1	0.0832837	0.116874	0.0492879	0.0691737	0.0374406	0.133604	0	0.0504083	0.0270672	0.0409632	0	0.108328	0.0978749	0	0.0527637	0.0989905	0.0975504	0.0409579	0.10222	0	0.137257	0	0	0.0734198	0.110054	0.139676	0.0372622
chr9	100550160	100498765	+	TMEFF1,MSANTD3-TMEFF1	circMSANTD3-TMEFF1_2	circ25830	0.193144	0.415494			1	1	1	1	1	1	1	1	1	1	1	1	0	0	0.0492879	0.011529	0	0	0.020615	0.0201633	0	0	0.0131561	0.0361094	0	0	0.0175879	0.0164984	0	0.0102395	0.0408879	0	0	0	0	0	0.0275134	0.0279352	0.0372622
chr9	109192278	109200334	-	EPB41L4B	circEPB41L4B	circ25889	-0.259681	0.27282		down_Mturquoise	1	1	1	1	1	1			1		1	0	0.0694031	0.0259721	0.0246439	0	0.0374406	0.0334009	0.020615	0.030245	0.0541345	0.0307224	0.0526245	0.0120365	0	0.0122966	0.0351758	0.0329968	0	0	0.20444	0.0286661	0.0228761	0.0258978	0.0561596	0.0104885	0	0.0419027	0
chr9	110972073	110973558	-	LPAR1	circLPAR1	circ25906	-0.104486	0.65401			1	1	1	1	1	1					0	0	0	0.0259721	0.0246439	0.0576448	0.0249604	0.0835022	0.04123	0.0504083	0.0360896	0.051204	0.0131561	0.0240729	0.0978749	0.0122966	0.0703516	0.0659937	0	0.0307184	0.163552	0.286661	0.251637	0.103591	0	0.0314656	0.137567	0.0698379	0.0124207
chr9	111386377	111391824	-	KIAA0368	circKIAA0368	circ25911	0.0778237	0.590523			1	1	1	1	1	1					0	0	0.0138806	0.0779162	0.0492879	0.011529	0.062401	0	0.020615	0.0100817	0.0721793	0.051204	0.0263123	0.0722188	0.03915	0.0245932	0.0175879	0.0494953	0	0.0204789	0.020444	0.143331	0.0457522	0	0.0701996	0.0524427	0	0.0279352	0.0621036
chr9	111534353	111527268	+	ZNF483	circZNF483	circ25924	0.0588997	0.815588			1	1	1	1	1	1					0	0	0.0555224	0.0259721	0.0492879	0	0.0499208	0.0167004	0.020615	0.0504083	0.0451121	0.0204816	0.0394684	0.0240729	0.019575	0	0.0527637	0.0659937	0.0243876	0.0204789	0.0613319	0.0286661	0.0228761	0.0258978	0.0421197	0.0734198	0.110054	0.0419027	0.0124207
chr9	112262435	112297916	-	PTBP3	circPTBP3	circ25970	0.47262	0.153057			1	1	1	1	1	1	1	1	1	1	1	1	0.0416418	0	0.0492879	0	0.0748812	0	0.04123	0.0100817	0.0180448	0.0307224	0.0789368	0.0120365	0	0.0122966	0.0879395	0	0	0.0307184	0.10222	0.0286661	0.0457522	0.0258978	0	0.0104885	0.0275134	0	0
chr9	119313138	119313405	-	BRINP1	circBRINP1	circ26004	0.102603	0.904728		down_Mturquoise	1	1	1	1	1	1	1	1	1	1	1	1	0.0277612	0.0259721	0.0246439	0.011529	0.0249604	0	0	0	0.0270672	0.0307224	0.0263123	0.0481459	0.03915	0	0.0175879	0.0164984	0.0243876	0.0307184	0.020444	0.0573322	0.0228761	0	0.0280798	0	0	0	0.0372622
chr9	120831331	120833456	-	PSMD5	circPSMD5	circ26019	-0.424567	0.237248		down_Mturquoise	1	1	1	1	1	1					0	0	0	0.0259721	0.0246439	0	0	0	0.020615	0	0.0270672	0.0102408	0	0	0	0	0	0	0.0243876	0.0102395	0.0817759	0.0286661	0	0	0	0.0104885	0	0.0279352	0
chr9	121974009	121989770	-	TTLL11	circTTLL11	circ26031	-0.202721	0.403312		down_Mturquoise	1	1	1	1	1	1			1	1	1	1	0.0832837	0	0.0492879	0.0461158	0.0873614	0	0.103075	0.0504083	0.0902241	0.051204	0.0657806	0.0481459	0	0	0.0879395	0.0659937	0.0243876	0.0204789	0.163552	0.114664	0.0457522	0.0258978	0.0280798	0.0943969	0.0550268	0.0279352	0
chr9	123757703	123879021	-	DENND1A	circDENND1A	circ26107	0.298665	0.191114			1	0	1	1	1	1			1	1	1	1	0	0	0.0246439	0.0345869	0.062401	0.150304	0.061845	0.0604899	0	0	0.0657806	0	0.11745	0.0614831	0.0527637	0.148486	0	0	0.10222	0	0.0457522	0.0776933	0.0842395	0.0734198	0.0550268	0.153643	0.111787
chr9	125337591	125337018	+	GAPVD1	circGAPVD1_1	circ26143	0.34683	0.129032			1	1	1	1	1	1					0	0	0.0277612	0.0259721	0.147864	0.0461158	0	0.0501013	0.04123	0.0403266	0.0270672	0.0204816	0.0131561	0.0962918	0.03915	0	0.0175879	0.0659937	0.0487752	0.0102395	0.0613319	0.200663	0	0.155387	0.0140399	0.0419542	0.0275134	0.0698379	0.0372622
chr9	125346941	125341177	+	GAPVD1	circGAPVD1_2	circ26146	0.08336	0.832945			1	1	1	1	1	1					0	0	0.0138806	0	0.0492879	0.0345869	0.0249604	0	0.020615	0.0403266	0	0.0716856	0.0526245	0.0120365	0	0	0.0175879	0.0164984	0.0487752	0.0204789	0	0.0573322	0.0228761	0	0.0280798	0	0	0.0139676	0.0124207
chr9	126395697	126340508	+	MVB12B	circMVB12B_1	circ26163	0.317141	0.627338			1	1	1	1	1	1			1	1	1	1	0	0	0	0.0230579	0.0249604	0	0.020615	0.030245	0	0	0	0.0481459	0	0	0	0	0.0243876	0	0	0.200663	0	0.0258978	0.0280798	0	0	0	0
chr9	126421948	126392066	+	MVB12B	circMVB12B_2	circ26170	0.366675	0.107386			1	1	1	1	1	1			1		1	0	0	0.0389581	0	0.0461158	0.0374406	0.0334009	0	0.0403266	0	0.0102408	0.0263123	0.0722188	0.03915	0.0122966	0.0351758	0.0494953	0.0243876	0.0204789	0.0817759	0.0286661	0.0228761	0	0	0.0419542	0	0.0419027	0.0248414
chr9	127345477	127344235	+	GARNL3	circGARNL3	circ26199	-0.265356	0.259969			1	1	1	1	1	1					0	0	0	0.012986	0.0246439	0.011529	0.0124802	0	0.020615	0	0.00902241	0.0102408	0	0.0120365	0	0	0	0.0164984	0	0.0102395	0	0.0286661	0.0228761	0	0.0140399	0.0314656	0.0275134	0.0139676	0
chr9	135850137	135883078	-	CAMSAP1	circCAMSAP1_1	circ26292	0.438825	0.0448904			1	1	1	1	1	1					0	0	0.0277612	0.012986	0.0492879	0	0.0124802	0.0501013	0.061845	0.0403266	0.0451121	0.0307224	0.0263123	0.0361094	0	0.0122966	0.0175879	0.0494953	0	0.0204789	0	0	0.0228761	0.0517955	0.0140399	0.0209771	0	0.0558703	0.0124207
chr9	135881633	135883078	-	CAMSAP1	circCAMSAP1_2	circ26295	-0.0167759	0.987232			1	1	1	1	1	1	1	1	1	1	1	1	0.0416418	0.142846	0.0985758	0.0576448	0.0873614	0.167004	0.0824599	0.0403266	0.117291	0.13313	0.105249	0.156474	0.1566	0.0614831	0.123115	0.0989905	0.0731628	0.0409579	0.306659	0.171997	0.274513	0.103591	0.0561596	0.178305	0.0550268	0.0698379	0.0993658
chrX	6150995	6151771	-	NLGN4X	circNLGN4X	circ27456	0.236519	0.545268		down_Mturquoise	1	1	1	1	1	1					0	0	0.0138806	0.012986	0	0.011529	0.0124802	0	0	0	0.0360896	0.0204816	0.0263123	0	0	0	0.0351758	0.0164984	0	0.0204789	0.0408879	0.0286661	0.0457522	0.0258978	0	0	0	0	0
chrX	10098579	10063445	+	WWC3	circWWC3	circ27024	-0.372367	1			1	1	1	1	1	1					0	0	0	0.0389581	0.0246439	0	0.0748812	0	0.020615	0.0504083	0.0451121	0.0716856	0	0.0361094	0.03915	0	0.0351758	0.0494953	0.0243876	0.0614368	0.183996	0.0859983	0.0457522	0	0.0701996	0.0419542	0.0550268	0	0
chrX	17138961	17133824	+	REPS2	circREPS2	circ27243	0.0369252	0.812898		down_Mturquoise	1	1	1	1	1	1			1		1	0	0	0	0.0492879	0.0345869	0.0124802	0.0167004	0.061845	0	0	0	0.0394684	0.0481459	0	0	0.0175879	0	0.0243876	0.0204789	0.020444	0.0573322	0.0915045	0	0	0	0.0275134	0	0.0248414
chrX	19607938	19687691	-	SH3KBP1	circSH3KBP1	circ27269	0.0617017	0.756193			0	0	0	0	0	0			1	1	1	1	0.0138806	0.0519441	0.0246439	0.011529	0.0124802	0	0	0.0100817	0	0.0102408	0	0.0120365	0.0782999	0	0	0.0329968	0.0243876	0	0.020444	0	0.0228761	0.0258978	0	0.0104885	0	0.0279352	0
chrX	24179770	24172715	+	ZFX	circZFX	circ27329	-0.302317	0.122609			1	1	1	1	1	1			1	1	1	1	0.0694031	0.0779162	0.0492879	0.0461158	0	0.0835022	0.020615	0.0504083	0.0541345	0.0307224	0.131561	0.0240729	0	0.0245932	0.0175879	0	0.0243876	0	0.163552	0.200663	0	0.0258978	0.0561596	0.0524427	0	0.139676	0.0496829
chrX	32287529	32348528	-	DMD	circDMD	circ27374	0.0175244	0.861179		down_Mturquoise	1	1	1	1	1	1			1		1	0	0.0277612	0.0649301	0.0739318	0.011529	0.0748812	0.0334009	0	0.030245	0	0.0307224	0.0657806	0.0842553	0.019575	0	0.0527637	0.0824921	0.0487752	0.0511973	0.0613319	0	0.0457522	0.0258978	0.0701996	0.0314656	0.0825402	0.0419027	0.0124207
chrX	53987078	53987944	-	PHF8	circPHF8	circ27446	-0.12597	0.780976		down_Mviolet	1	1	1	1	1	1					0	0	0.0138806	0.012986	0	0.011529	0.0249604	0	0	0.0201633	0.00902241	0.0204816	0.0131561	0.0240729	0	0	0	0.0164984	0	0	0	0	0	0	0.0280798	0.0209771	0	0	0.0124207
chrX	80707427	80719656	-	BRWD3	circBRWD3_1	circ27538	-0.0805819	0.782159		down_Mturquoise	1	1	1	1	1	1					0	0	0.0277612	0.012986	0.0246439	0	0.0499208	0	0	0.0100817	0.0541345	0.0614448	0.0263123	0.0240729	0.019575	0.0122966	0.0351758	0.0329968	0.0243876	0.0307184	0.0613319	0.0573322	0.0686283	0.0258978	0.0280798	0.0104885	0.0275134	0	0
chrX	80733456	80736088	-	BRWD3	circBRWD3_2	circ27540	0.510247	0.119669		down_Mturquoise	1	1	1	1	1	1					0	0	0.0138806	0	0	0.011529	0	0	0.061845	0.030245	0.0360896	0.0102408	0.0131561	0.0240729	0.019575	0	0.0351758	0.0329968	0.0243876	0	0.0408879	0.0859983	0	0.0517955	0.0421197	0.0209771	0	0.0419027	0
chrX	111152447	111142096	+	PAK3	circPAK3_1	circ27051	-0.0286472	0.957433		down_Mturquoise	1	1	1	1	1	1	1	1	1	1	1	1	0.0277612	0.0259721	0	0.011529	0.0374406	0	0.04123	0	0.0270672	0.0307224	0.0263123	0.0361094	0.0782999	0	0.0351758	0.0164984	0	0	0	0.0286661	0.0228761	0.0258978	0.0140399	0	0	0	0.0124207
chrX	111173081	111142096	+	PAK3	circPAK3_2	circ27057	0.0324426	0.886712			1	1	1	1	1	1	1	1	1	1	1	1	0.166567	0.12986	0.221795	0.172934	0.224644	0.0501013	0.0824599	0.100817	0.126314	0.163853	0.328903	0.156474	0	0.0737797	0	0	0.121938	0.133113	0.490655	0.171997	0.320266	0	0.168479	0.209771	0.110054	0.139676	0.260835
chrX	111173081	111162915	+	PAK3	circPAK3_3	circ27060	-0.00665284	0.91363		down_Mturquoise	1	1	1	1	1	1			1	1	1	1	0.0416418	0	0.0246439	0.0230579	0.0249604	0.0167004	0	0.0100817	0.0180448	0.0204816	0.0263123	0	0	0.0245932	0.0527637	0.0659937	0	0.0204789	0.020444	0.0286661	0.0457522	0.0258978	0.0140399	0.0314656	0.0550268	0	0.0496829
chrX	135549805	135545423	+	INTS6L	circINTS6L	circ27163	-0.270639	0.623944		down_Mturquoise	1	1	1	1	1	1					0	0	0	0	0.0739318	0	0.0499208	0	0.04123	0.0403266	0.0541345	0	0.0920929	0.0240729	0.03915	0	0.0527637	0.0329968	0.0243876	0	0.0613319	0.229329	0	0.103591	0.0982794	0	0.137567	0.0698379	0
chrX	140784660	140783176	+	CDR1	circCDR1-AS	circ27173	-0.413002	0.474425			1	1	1	1	1	1	1	1			1	1	2.69284	12.5835	1.42935	10.6873	5.42889	9.01824	9.11182	4.96017	4.69165	1.23914	5.32823	3.49058	3.87585	2.69296	1.47738	1.35287	3.02406	2.7237	1.3493	9.60315	2.17323	7.30317	9.92622	21.8896	4.3196	10.322	7.97411
chrX	148662768	148661908	+	AFF2	circAFF2	circ27181	0.211317	0.524861			1	1	1	1	1	1	1	1	1	1	1	1	0.111045	0.116874	0.172508	0.11529	0.112322	0.0167004	0.103075	0.0504083	0.0721793	0.225298	0.197342	0.132401	0.0978749	0.0614831	0.140703	0.0989905	0.0975504	0.153592	0.20444	0.286661	0.160133	0.207182	0.238678	0.136351	0.192594	0.0838055	0.0993658
chrY	12913062	12909360	+	DDX3Y	circDDX3Y	circ27587	-0.695522	0.0284108	down		1	1	1	1	1	1					0	0	0	0	0.0985758	0	0	0	0	0.030245	0.0270672	0.0204816	0	0	0.019575	0.0245932	0.123115	0.0164984	0	0.0204789	0	0	0	0.0517955	0.0421197	0	0	0	0
chrY	19587507	19587210	+	TXLNGY	circTXLNGY	circ27599	0.22486	0.216144		down_Mturquoise	1	1	1	1	1	1					0	0	0	0	0.0246439	0.011529	0.0249604	0	0	0.0100817	0.0180448	0.0307224	0	0.0240729	0.03915	0	0	0.0494953	0.0243876	0.0307184	0	0	0	0.0258978	0.0140399	0	0.0275134	0	0.0124207
[truncated: 107 more columns]
