# Supplementary material for: Genome-wide, integrative analysis of circular RNA dysregulation and the corresponding circular RNA-microRNA-mRNA regulatory axes in autism
Source: HighWire-hosted journal article supplement (doi:10.1101/gr.255463.119), 2020-03-01
Supplement: Supplemental_Table_S4_targets_of_58miRNAs_new.xlsx [file Supplemental_Table_S4_targets_of_58miRNAs_new.xlsx]

## Sheet: Note
Supplemental Table S4. The identified ASD-associated circRNA-miRNA and miRNA-mRNA regulatory axes.
This excel file includes four sub-tables.
Table 1. The potential circRNA-miRNA regulatory axes. The table represents numbers of the predicted binding sites of the 58 DE-miRNAs in the circle sequences of the 60 DE-circRNAs.
Table 2. The potential circRNA-miRNA regulatory axes. The table represents numbers of the predicted binding sites of the 58 DE-miRNAs in the circle sequences of the circRNAs from the DE-modules.
In Table 2, the circRNAs are not listed, if no binding sites of the 58 DE-miRNAs are detected in the circle sequences of the circRNAs.
For Tables 1 & 2, the numbers represent the numbers of RNA22-predicted miRNA binding sites.
Tables 3 and 4. The potential miRNA-mRNA regulatory axes. Theses two tables represent the 58 DE-miRNAs and their corresponding targets.
Of note, the 58 DE-miRNAs include 37 well-annotated miRNAs (Table 3) and 21 miRNAs (Table 4) newly identified by the study of Wu et al. (reference).
37miRNA:	For the 37 miRNAs, we identified targets of these miRNAs based on the MicroRNA Target Filter in the IPA package and TarBase (v8).
21novel_miRNA:	For the other 21 miRNAs, which were not found in IPA/TarBase, we identified targets of these miRNAs using the MirTarget algorithm via the miRDB Web server.
For accuracy, we only considered the predicted miRNA-mRNA binding events that were also previously identified by Wu et al.
Of note, the predicted miRNA-mRNA binding events previously identified by Wu et al. represented that the binding events should satisfy one of the two criteria (the strongest target and the most conserved target criteria) defined by Wu et al.
Reference:
Wu YE, Parikshak NN, Belgard TG, Geschwind DH. Genome-wide, integrative analysis implicates microRNA dysregulation in autism spectrum disorder. Nat Neurosci 19, 1463-1476 (2016).

## Sheet: 60 DE-circRNAs vs DE-miRNAs
	Upregulated circRNAs (host gene symbol/circRNA ID)																						Downregulated circRNAs (host gene symbol/circRNA ID)
	ARHGEF7	ARID1A	ASIC2	ASPH	ATP2C1	CBFA2T2	DYNC1H1	ERI3	MAN2A1	MCF2L2	NME7	PKN1	PPP2R2B	PPP4R1	SFMBT2	SSBP2	STK39	TMCC1	TMOD3	UBAP2	UNC79	ZMYM2	ADGRB3	ATE1	ATG5	ATRNL1	ATRNL1	ATRNL1	ATRNL1	ATRNL1	BAZ2B	BICD1	CCDC66	CNTNAP5	CPSF6	CYP2U1	DDX3Y	DLG1	EIF4G3	ERC1	FAM216A	FAT3	GRK4	KLHL24	KLHL24	KMT2E	MAN1A2	MLIP	NALCN
	circ7852	circ5511	circ10504	circ25503	circ16827	circ12861	circ6877	circ7177	circ6066	circ17403	circ2748	circ12297	circ20464	circ12207	circ1057	circ21294	circ14192	circ16822	circ8487	circ26539	circ5999	circ20012	circ22526	circ364	circ17406	circ196	circ202	circ206	circ217	circ246	circ14091	circ4735	circ18268	circ18608	circ21473	circ13522	circ5918	circ17606	circ3518	circ4215	circ3752	circ3279	circ19323	circ17411	circ5522	circ22965	circ14544	circ22417	circ5960
hsa_can_1002-m	1							1		1	1			1					1	1						1	1	1	1	1				1		1		1		1		1				2	1		1
hsa_can_1155-m
hsa_can_1727-m											1						1			1			2	1	2			1	1	1												1	1	2
hsa_can_2071-m																1									1						2								1								1
hsa_can_2434-m					1			1																	1																	1
hsa_can_575-m							1							1									1						1	1	1				1							1	1				1
hsa_can_74-m
hsa-miR-204-3p		7								1	1		1	1								1							2	2	2		1	2	1				1			2
hsa-miR-3687		1			1																									1	1							1				2
hsa-miR-491-5p		1					1													1				1					1	1	1	2			1	1				1		3				1
hsa-miR-5096									1										1					1					1	2									4					1	1	1
hsa-miR-619-5p		5	2											1					1		1	2						1	1	2	1				4			1	2			5	3	2	2
hsa-P1-can676-m		1															1																		2	1	1					1				1			1
hsa-P1-can888-m		7	2	1			1	2	1						1		1				3	2		1				2	2	2	2				4	4			4		1	5	2	2	1	3	2	1	1
hsa-P5-can399-m	1	1												1						1		1					1	1	1	1	1															1
hsa-P7-can8443-m																															1					1													1
hsa-P9-can627-m
hsa_can_257-m				1															1			1		1					1	1	1				1		1	1					1						2
hsa_can_270-m					1																																									1
hsa-chr2_4541-m																															1	1
hsa-chr5_13097-m			2	2		2				1				1								1	1			1	1	2	2	5		1		2				1	2		1	2		1	1	1		1
hsa-chr5_14497-s		2		1										1					1	3			1	1					1	1		1			2							1	1	1	1		1		1
hsa-chr9_24118-m																	2	1										1	1	1	1								1								1
hsa-chrX_20124-m																									1					1				2			1
hsa-let-7g-3p					1				1			1					1		1							1	1	1	2	2	1											1
hsa-miR-107						1								1		1	1		1				1					1	1	1	2	1		1					2			3	2	1	1
hsa-miR-10a-5p		1											1						1																				1			1
hsa-miR-1277-3p																																1
hsa-miR-129-2-3p
hsa-miR-130b-5p																				1		1							1	1	1											2	2				1	1
hsa-miR-148a-3p						1																						1	1	1	1												1	1			1
hsa-miR-155-5p						1																																	1			1	1
hsa-miR-18b-5p																	1					1				1	1	1	1	1	1			1		1
hsa-miR-20b-5p														1				1																					1			1
hsa-miR-21-3p																															1
hsa-miR-218-2-3p																				1				1					1	1	1												1	2	2
hsa-miR-221-3p					1				1								1												1	1												2	3			1	2		1
hsa-miR-223-3p																													1	1									1			1
hsa-miR-2277-5p	1									1		1				1	1					2				1	1	2	3	3	2	1			2	1			1		1		2	3	2
hsa-miR-23a-3p						1	1					1											1										1
hsa-miR-335-3p										1														1							1					1		1	2			1	1					1
hsa-miR-363-3p																										1	1	1	1	1							1
hsa-miR-3938																																							1								1
hsa-miR-424-3p											1																1	1	1	1					2
hsa-miR-424-5p																													1	1									1
hsa-miR-425-3p																										1	1	1	1	1									1			1	1
hsa-miR-449b-5p		1	1		2	1	1		1		1		1	1									1	1				1	1	2			1		1				1	1	1	3	2			1	1	1
hsa-miR-450b-5p																					1				1																	2	1	1	1	1			1
hsa-miR-484								1																											1							1						1
hsa-miR-629-5p	1							1									1		1		1				1							1			1				1	1		3	2			1
hsa-miR-651-5p													1													1	1	1	2	1						1			1
hsa-miR-708-5p				1																	1	1						1	1	1	1								1			1
hsa-miR-766-3p								1											1										1	1												1
hsa-miR-874-3p	1									1							1		1	2										1	1			1								2	1		1		1
hsa-miR-887-3p							1						1									1																				1	1
hsa-miR-940																								1							2				1
hsa-P1-can914-m			1		1																			1
hsa-P2-can246-m						1		1				1				1			1			1		1							3	1		1		1	2	1				1		2	2	1	3
# of potential circRNA-miRNA interactions	5	10	5	5	7	7	6	7	5	6	5	4	5	10	1	4	11	2	12	8	5	12	7	12	6	8	10	18	30	33	25	9	3	8	14	10	5	7	21	4	4	31	20	12	11	13	13	6	8
[truncated: 11 more columns]

## Sheet: DE-module circRNAs vs DE-miRNAs
	Module_Violet			Module_Darkred			Module_Turquiose
	ARFGEF3	GMPS	SYNE1	APBB2	APBB2	CNTNAP5	ADARB1	ANKHD1	ANKS1B	ASH1L	ATE1	ATG5	ATRNL1	ATRNL1	ATRNL1	ATRNL1	ATRNL1	BMPR2	BTBD9	EML5	ERC1	FARSA	FAT3	FNDC3A	GLCCI1	HERC1	HTT	IDE	INTS6L	KCNN2	KLHL24	LMBR1	MAN1A2	MAN1A2	MGA	MGEA5	MLIP	MPP5	NAV3	NEMF	NEURL1	NRXN1	PACRGL	PAK3	PHKB	PLCL2	PTK2	RAB23	RASA2
	circ21803	circ17131	circ21958	circ19427	circ19428	circ13511	circ13923	circ20367	circ5873	circ2521	circ364	circ21473	circ206	circ207	circ217	circ219	circ246	circ14627	circ22307	circ7761	circ4215	circ12265	circ3279	circ6490	circ24197	circ8638	circ19332	circ1288	circ27163	circ20106	circ17405	circ23534	circ2055	circ2066	circ8229	circ31	circ22417	circ7509	circ5580	circ7234	circ91	circ15905	circ19215	circ27051	circ9676	circ17228	circ24890	circ22472	circ16972
hsa-miR-3687	1																						2				1			1					1						2				1	2
hsa-miR-5096						1		1							1	1	1	2							1						1								1		1	2				1
hsa-miR-619-5p	1			1	1	1		2	1	3			1	1	1	1	1	1	1			2	5			1		1	2		2	1						1	2		1	1		1	2	2			1
hsa-P1-can888-m	2		2	2	2		2	3	1	4	2		1	1	1	1	1	4	2	1	1	1	7	1	1	3		1	2	3	1	5	1	1	2	4	1				5	1			1	1		2
hsa-P5-can399-m		1											1	1	1			2							1	1						1								1		2					1
hsa-P7-can8443-m	1										1																													1
hsa-P9-can627-m																																								1						1
hsa-miR-107				1	1			1	3						1	1	1	1	1	1		1	3			1	2		1		1					1		2		2	2		1		1	2
hsa-miR-10a-5p	1			1	1																		1																	1									1
hsa-miR-23a-3p																																1
hsa-miR-3938								1														1												1				1									1	1
hsa-miR-424-5p		1		1	1				2						1	1	1		1				2					1																	1
hsa-miR-450b-5p												1								1											1				1					1		1
hsa-miR-491-5p				3	3						1				1	1	1	2	1		1		2	1	1				1							2					1		1		1			1
hsa-miR-708-5p	1					2							1	1	1	1	1		1		1	1	1													1				1	1	1		1	1
hsa-P1-can914-m										1	3				1	1	1									1		1						1
# of potential circRNA-miRNA interactions	6	2	1	6	6	3	1	5	4	3	4	1	4	4	9	8	8	6	6	3	3	5	8	2	4	5	2	4	4	2	5	4	1	3	3	4	1	3	2	7	7	6	2	2	7	6	2	3	2
[truncated: 16 more columns]

## Sheet: 37miRNAs vs targets
miRNA_ID	TargetScan (with IPA filter score < -0.16) (1: yes)	Ingenuity_Expert_Finding_in_IPA (1: yes)	Confidence (from IPA)	TarBase_v8 (1: yes)	starBase_v2 (1: yes)	AgoExpNum (from starBase_v2)	experimentally supported (C or E or F)	Gene_Symbol	ENSG_ID	Targets of downregulated miRNAs identified by Wu et al. (conserved; 1: yes)	Targets of upregulated miRNAs identified by Wu et al. (conserved; 1: yes)	Targets of downregulated miRNAs identified by Wu et al. (strongest; 1: yes)	Targets of upregulated miRNAs identified by Wu et al. (strongest; 1: yes)
hsa-let-7g-3p	1		Experimentally Observed,High (predicted)	1			1	DCUN1D1	ENSG00000043093	1	1		1
hsa-let-7g-3p	1		Experimentally Observed,High (predicted)	1			1	EFEMP1	ENSG00000115380		1		1
hsa-let-7g-3p	1		Experimentally Observed,High (predicted)	1			1	EI24	ENSG00000149547
hsa-let-7g-3p	1		Experimentally Observed,High (predicted)	1			1	EXOC1	ENSG00000090989
hsa-let-7g-3p	1		Experimentally Observed,High (predicted)	1			1	HVCN1	ENSG00000122986		1
hsa-let-7g-3p	1		Experimentally Observed,High (predicted)	1			1	PPP1CC	ENSG00000186298		1		1
hsa-let-7g-3p	1		Experimentally Observed,High (predicted)	1			1	RAB5C	ENSG00000108774
hsa-let-7g-3p	1		Experimentally Observed,High (predicted)	1			1	RAC1	ENSG00000136238	1	1		1
hsa-let-7g-3p	1		Experimentally Observed,High (predicted)	1			1	UBE2G1	ENSG00000132388	1	1	1	1
hsa-let-7g-3p	1		Experimentally Observed,High (predicted)	1			1	ZNF367	ENSG00000165244		1		1
hsa-let-7g-3p	1		Experimentally Observed,Moderate (predicted)	1			1	ABHD17C	ENSG00000136379	1	1	1	1
hsa-let-7g-3p	1		Experimentally Observed,Moderate (predicted)	1			1	BTG1	ENSG00000133639	1	1	1	1
hsa-let-7g-3p	1		Experimentally Observed,Moderate (predicted)	1			1	CCNG2	ENSG00000138764	1	1	1	1
hsa-let-7g-3p	1		Experimentally Observed,Moderate (predicted)	1			1	COL4A1	ENSG00000187498	1	1		1
hsa-let-7g-3p	1		Experimentally Observed,Moderate (predicted)	1			1	CPEB3	ENSG00000107864	1	1		1
hsa-let-7g-3p	1		Experimentally Observed,Moderate (predicted)	1			1	EGFR	ENSG00000146648			1	1
hsa-let-7g-3p	1		Experimentally Observed,Moderate (predicted)	1			1	FBXO21	ENSG00000135108	1	1	1	1
hsa-let-7g-3p	1		Experimentally Observed,Moderate (predicted)	1			1	FOXJ3	ENSG00000198815		1	1	1
hsa-let-7g-3p	1		Experimentally Observed,Moderate (predicted)	1			1	GOLGA5	ENSG00000066455			1
hsa-let-7g-3p	1		Experimentally Observed,Moderate (predicted)	1			1	GPRC5A	ENSG00000013588
hsa-let-7g-3p	1		Experimentally Observed,Moderate (predicted)	1			1	H1F0	ENSG00000189060		1
hsa-let-7g-3p	1		Experimentally Observed,Moderate (predicted)	1			1	HAS2	ENSG00000170961	1	1	1	1
hsa-let-7g-3p	1		Experimentally Observed,Moderate (predicted)	1			1	HMGB2	ENSG00000164104	1	1	1	1
hsa-let-7g-3p	1		Experimentally Observed,Moderate (predicted)	1			1	HNRNPH2	ENSG00000126945	1
hsa-let-7g-3p	1		Experimentally Observed,Moderate (predicted)	1			1	IKZF2	ENSG00000030419
hsa-let-7g-3p	1		Experimentally Observed,Moderate (predicted)	1			1	INPP5A	ENSG00000068383			1	1
hsa-let-7g-3p	1		Experimentally Observed,Moderate (predicted)	1			1	JMJD1C	ENSG00000171988		1
hsa-let-7g-3p	1		Experimentally Observed,Moderate (predicted)	1			1	LRIG1	ENSG00000282243
hsa-let-7g-3p	1		Experimentally Observed,Moderate (predicted)	1			1	LYRM2	ENSG00000083099				1
hsa-let-7g-3p	1		Experimentally Observed,Moderate (predicted)	1			1	MAP4K3	ENSG00000011566	1	1	1
hsa-let-7g-3p	1		Experimentally Observed,Moderate (predicted)	1			1	MAPK6	ENSG00000069956		1
hsa-let-7g-3p	1		Experimentally Observed,Moderate (predicted)	1			1	MCL1	ENSG00000143384		1	1	1
hsa-let-7g-3p	1		Experimentally Observed,Moderate (predicted)	1			1	MITF	ENSG00000187098	1		1	1
hsa-let-7g-3p	1		Experimentally Observed,Moderate (predicted)	1			1	MT2A	ENSG00000125148
hsa-let-7g-3p	1		Experimentally Observed,Moderate (predicted)	1			1	NFKBIA	ENSG00000100906		1
hsa-let-7g-3p	1		Experimentally Observed,Moderate (predicted)	1			1	PAFAH1B2	ENSG00000168092		1	1	1
hsa-let-7g-3p	1		Experimentally Observed,Moderate (predicted)	1			1	PHF13	ENSG00000116273		1		1
hsa-let-7g-3p	1		Experimentally Observed,Moderate (predicted)	1			1	POLE3	ENSG00000148229	1	1	1	1
hsa-let-7g-3p	1		Experimentally Observed,Moderate (predicted)	1			1	PRKAA1	ENSG00000132356	1	1		1
hsa-let-7g-3p	1		Experimentally Observed,Moderate (predicted)	1			1	PTGES3	ENSG00000110958	1	1	1	1
hsa-let-7g-3p	1		Experimentally Observed,Moderate (predicted)	1			1	PTK2	ENSG00000169398	1	1	1	1
hsa-let-7g-3p	1		Experimentally Observed,Moderate (predicted)	1			1	RAD23B	ENSG00000119318		1	1	1
hsa-let-7g-3p	1		Experimentally Observed,Moderate (predicted)	1			1	RASSF8	ENSG00000123094		1	1	1
hsa-let-7g-3p	1		Experimentally Observed,Moderate (predicted)	1			1	RBM27	ENSG00000091009	1	1	1	1
hsa-let-7g-3p	1		Experimentally Observed,Moderate (predicted)	1			1	REV3L	ENSG00000009413		1		1
hsa-let-7g-3p	1		Experimentally Observed,Moderate (predicted)	1			1	RFX3	ENSG00000080298			1
hsa-let-7g-3p	1		Experimentally Observed,Moderate (predicted)	1			1	RPL19	ENSG00000108298		1
hsa-let-7g-3p	1		Experimentally Observed,Moderate (predicted)	1			1	SCAMP2	ENSG00000140497		1		1
hsa-let-7g-3p	1		Experimentally Observed,Moderate (predicted)	1			1	SGMS1	ENSG00000198964		1	1	1
hsa-let-7g-3p	1		Experimentally Observed,Moderate (predicted)	1			1	SLC30A7	ENSG00000162695	1	1	1	1
hsa-let-7g-3p	1		Experimentally Observed,Moderate (predicted)	1			1	SLC38A2	ENSG00000134294	1	1	1	1
hsa-let-7g-3p	1		Experimentally Observed,Moderate (predicted)	1			1	SRSF4	ENSG00000116350		1
hsa-let-7g-3p	1		Experimentally Observed,Moderate (predicted)	1			1	TP53INP1	ENSG00000164938
hsa-let-7g-3p	1		Experimentally Observed,Moderate (predicted)	1			1	TRIM33	ENSG00000197323	1		1	1
hsa-let-7g-3p	1		Experimentally Observed,Moderate (predicted)	1			1	TSNAX	ENSG00000116918
hsa-let-7g-3p	1		Experimentally Observed,Moderate (predicted)	1			1	TUBB4B	ENSG00000188229		1
hsa-let-7g-3p	1		Experimentally Observed,Moderate (predicted)	1			1	VLDLR	ENSG00000147852	1	1	1	1
hsa-let-7g-3p	1		Experimentally Observed,Moderate (predicted)	1			1	ZFYVE21	ENSG00000100711		1		1
hsa-let-7g-3p	1		Experimentally Observed,Moderate (predicted)	1			1	ZNF100	ENSG00000197020				1
hsa-let-7g-3p			Experimentally Observed	1			1	ACSL3	ENSG00000123983	1	1		1
hsa-let-7g-3p			Experimentally Observed	1			1	ACTB	ENSG00000075624	1	1	1	1
hsa-let-7g-3p			Experimentally Observed	1			1	ADAM10	ENSG00000137845	1	1	1	1
hsa-let-7g-3p			Experimentally Observed	1			1	ADCYAP1	ENSG00000141433	1	1	1	1
hsa-let-7g-3p			Experimentally Observed	1			1	ADIPOR2	ENSG00000006831	1	1	1	1
hsa-let-7g-3p			Experimentally Observed	1			1	AFF4	ENSG00000072364	1	1	1	1
hsa-let-7g-3p			Experimentally Observed	1			1	AGPAT5	ENSG00000155189		1	1	1
hsa-let-7g-3p			Experimentally Observed	1			1	AHNAK	ENSG00000124942		1		1
hsa-let-7g-3p			Experimentally Observed	1			1	AKIRIN1	ENSG00000174574	1	1	1	1
hsa-let-7g-3p			Experimentally Observed	1			1	AMBRA1	ENSG00000110497
hsa-let-7g-3p			Experimentally Observed	1			1	AMOTL1	ENSG00000166025		1		1
hsa-let-7g-3p			Experimentally Observed	1			1	ANKRD28	ENSG00000206560		1	1	1
hsa-let-7g-3p			Experimentally Observed	1			1	ANKRD52	ENSG00000139645	1	1
hsa-let-7g-3p			Experimentally Observed	1			1	ANTXR1	ENSG00000169604	1	1	1	1
hsa-let-7g-3p			Experimentally Observed	1			1	AP2A1	ENSG00000196961		1
hsa-let-7g-3p			Experimentally Observed	1			1	APBB1	ENSG00000166313		1
hsa-let-7g-3p			Experimentally Observed	1			1	APBB3	ENSG00000113108	1	1
hsa-let-7g-3p			Experimentally Observed	1			1	APEX1	ENSG00000100823
hsa-let-7g-3p			Experimentally Observed	1			1	APLP2	ENSG00000084234	1		1
hsa-let-7g-3p			Experimentally Observed	1			1	APP	ENSG00000142192		1		1
hsa-let-7g-3p			Experimentally Observed	1			1	ARF6	ENSG00000165527		1		1
hsa-let-7g-3p			Experimentally Observed	1			1	ARFGEF1	ENSG00000066777		1		1
hsa-let-7g-3p			Experimentally Observed	1			1	ARHGAP5	ENSG00000100852	1	1	1	1
hsa-let-7g-3p			Experimentally Observed	1			1	ARID1A	ENSG00000117713	1	1	1	1
hsa-let-7g-3p			Experimentally Observed	1			1	ARID3A	ENSG00000116017		1
hsa-let-7g-3p			Experimentally Observed	1			1	ARL6IP1	ENSG00000170540
hsa-let-7g-3p			Experimentally Observed	1			1	ARNT2	ENSG00000172379
hsa-let-7g-3p			Experimentally Observed	1			1	ATAD1	ENSG00000283024
hsa-let-7g-3p			Experimentally Observed	1			1	ATF4	ENSG00000128272
hsa-let-7g-3p			Experimentally Observed	1			1	ATP2A2	ENSG00000174437	1	1	1	1
hsa-let-7g-3p			Experimentally Observed	1			1	ATP2B1	ENSG00000070961	1	1	1	1
hsa-let-7g-3p			Experimentally Observed	1			1	ATP6V1E1	ENSG00000131100
hsa-let-7g-3p			Experimentally Observed	1			1	ATP6V1G1	ENSG00000136888		1
hsa-let-7g-3p			Experimentally Observed	1			1	B4GALNT4	ENSG00000182272	1
hsa-let-7g-3p			Experimentally Observed	1			1	BAP1	ENSG00000163930	1	1	1	1
hsa-let-7g-3p			Experimentally Observed	1			1	BAZ1B	ENSG00000009954		1		1
hsa-let-7g-3p			Experimentally Observed	1			1	BCOR	ENSG00000183337	1	1
hsa-let-7g-3p			Experimentally Observed	1			1	BLCAP	ENSG00000166619	1	1	1	1
hsa-let-7g-3p			Experimentally Observed	1			1	BTBD7	ENSG00000277222
hsa-let-7g-3p			Experimentally Observed	1			1	BTG2	ENSG00000159388		1	1	1
hsa-let-7g-3p			Experimentally Observed	1			1	C11orf95	ENSG00000188070
hsa-let-7g-3p			Experimentally Observed	1			1	C2orf42	ENSG00000115998	1	1	1
hsa-let-7g-3p			Experimentally Observed	1			1	CACNG8	ENSG00000142408
hsa-let-7g-3p			Experimentally Observed	1			1	CADM1	ENSG00000182985		1	1	1
hsa-let-7g-3p			Experimentally Observed	1			1	CALM2	ENSG00000143933	1	1
hsa-let-7g-3p			Experimentally Observed	1			1	CAMSAP2	ENSG00000118200		1	1	1
hsa-let-7g-3p			Experimentally Observed	1			1	CAP1	ENSG00000131236	1	1		1
hsa-let-7g-3p			Experimentally Observed	1			1	CCDC14	ENSG00000175455	1	1	1	1
hsa-let-7g-3p			Experimentally Observed	1			1	CCDC173	ENSG00000154479		1
hsa-let-7g-3p			Experimentally Observed	1			1	CCDC82	ENSG00000149231
hsa-let-7g-3p			Experimentally Observed	1			1	CCNB2	ENSG00000157456
hsa-let-7g-3p			Experimentally Observed	1			1	CCNG1	ENSG00000113328		1	1
hsa-let-7g-3p			Experimentally Observed	1			1	CDH13	ENSG00000140945		1	1	1
hsa-let-7g-3p			Experimentally Observed	1			1	CDK14	ENSG00000058091	1	1		1
hsa-let-7g-3p			Experimentally Observed	1			1	CDKN1A	ENSG00000124762		1
hsa-let-7g-3p			Experimentally Observed	1			1	CDKN1C	ENSG00000273707
hsa-let-7g-3p			Experimentally Observed	1			1	CDON	ENSG00000064309	1	1		1
hsa-let-7g-3p			Experimentally Observed	1			1	CEMIP	ENSG00000103888	1	1	1	1
hsa-let-7g-3p			Experimentally Observed	1			1	CHD7	ENSG00000171316	1	1	1	1
hsa-let-7g-3p			Experimentally Observed	1			1	CLASRP	ENSG00000104859		1
hsa-let-7g-3p			Experimentally Observed	1			1	CLPTM1	ENSG00000104853
hsa-let-7g-3p			Experimentally Observed	1			1	CLPX	ENSG00000166855
hsa-let-7g-3p			Experimentally Observed	1			1	COPA	ENSG00000122218	1	1	1	1
hsa-let-7g-3p			Experimentally Observed	1			1	CORO1C	ENSG00000110880	1	1	1	1
hsa-let-7g-3p			Experimentally Observed	1			1	CPNE1	ENSG00000214078		1
hsa-let-7g-3p			Experimentally Observed	1			1	CPSF2	ENSG00000165934	1		1	1
hsa-let-7g-3p			Experimentally Observed	1			1	CREB1	ENSG00000118260		1	1	1
hsa-let-7g-3p			Experimentally Observed	1			1	CTCF	ENSG00000102974	1	1	1	1
hsa-let-7g-3p			Experimentally Observed	1			1	CTDSPL	ENSG00000144677		1	1	1
hsa-let-7g-3p			Experimentally Observed	1			1	CUL3	ENSG00000036257	1	1	1	1
hsa-let-7g-3p			Experimentally Observed	1			1	CYB5R3	ENSG00000100243			1	1
hsa-let-7g-3p			Experimentally Observed	1			1	CYR61	ENSG00000142871		1		1
hsa-let-7g-3p			Experimentally Observed	1			1	DAB2IP	ENSG00000136848	1	1	1	1
hsa-let-7g-3p			Experimentally Observed	1			1	DDR2	ENSG00000162733
hsa-let-7g-3p			Experimentally Observed	1			1	DENND1B	ENSG00000213047	1	1	1	1
hsa-let-7g-3p			Experimentally Observed	1			1	DEPDC5	ENSG00000100150		1	1
hsa-let-7g-3p			Experimentally Observed	1			1	DGCR2	ENSG00000070413		1	1	1
hsa-let-7g-3p			Experimentally Observed	1			1	DGKD	ENSG00000280873
hsa-let-7g-3p			Experimentally Observed	1			1	DHCR7	ENSG00000172893				1
hsa-let-7g-3p			Experimentally Observed	1			1	DSG2	ENSG00000046604	1		1	1
hsa-let-7g-3p			Experimentally Observed	1			1	E2F3	ENSG00000112242	1	1	1	1
hsa-let-7g-3p			Experimentally Observed	1			1	E2F6	ENSG00000169016
hsa-let-7g-3p			Experimentally Observed	1			1	ECT2	ENSG00000114346		1		1
hsa-let-7g-3p			Experimentally Observed	1			1	EDRF1	ENSG00000107938			1
hsa-let-7g-3p			Experimentally Observed	1			1	EEA1	ENSG00000102189	1	1	1	1
hsa-let-7g-3p			Experimentally Observed	1			1	EID1	ENSG00000255302
hsa-let-7g-3p			Experimentally Observed	1			1	ELF1	ENSG00000120690				1
hsa-let-7g-3p			Experimentally Observed	1			1	ELK4	ENSG00000158711		1	1	1
hsa-let-7g-3p			Experimentally Observed	1			1	ELMSAN1	ENSG00000156030		1		1
hsa-let-7g-3p			Experimentally Observed	1			1	ELOF1	ENSG00000130165		1
hsa-let-7g-3p			Experimentally Observed	1			1	ELP2	ENSG00000134759		1
hsa-let-7g-3p			Experimentally Observed	1			1	EML1	ENSG00000066629	1	1	1	1
hsa-let-7g-3p			Experimentally Observed	1			1	EP400	ENSG00000183495			1	1
hsa-let-7g-3p			Experimentally Observed	1			1	EPB41L5	ENSG00000115109	1	1	1	1
hsa-let-7g-3p			Experimentally Observed	1			1	EPS8	ENSG00000151491	1	1	1	1
hsa-let-7g-3p			Experimentally Observed	1			1	ETNK1	ENSG00000139163		1		1
hsa-let-7g-3p			Experimentally Observed	1			1	EXTL2	ENSG00000162694
hsa-let-7g-3p			Experimentally Observed	1			1	FADD	ENSG00000168040
hsa-let-7g-3p			Experimentally Observed	1			1	FAM103A1	ENSG00000169612
hsa-let-7g-3p			Experimentally Observed	1			1	FAM189B	ENSG00000262666
hsa-let-7g-3p			Experimentally Observed	1			1	FAM76B	ENSG00000077458	1
hsa-let-7g-3p			Experimentally Observed	1			1	FBXL16	ENSG00000127585		1	1	1
hsa-let-7g-3p			Experimentally Observed	1			1	FBXO5	ENSG00000112029
hsa-let-7g-3p			Experimentally Observed	1			1	FBXW11	ENSG00000072803	1	1	1	1
hsa-let-7g-3p			Experimentally Observed	1			1	FGF2	ENSG00000138685		1		1
hsa-let-7g-3p			Experimentally Observed	1			1	FGFRL1	ENSG00000127418			1	1
hsa-let-7g-3p			Experimentally Observed	1			1	FLNA	ENSG00000196924		1
hsa-let-7g-3p			Experimentally Observed	1			1	FMNL3	ENSG00000161791		1
hsa-let-7g-3p			Experimentally Observed	1			1	FOXP1	ENSG00000114861	1	1	1	1
hsa-let-7g-3p			Experimentally Observed	1			1	FST	ENSG00000134363
hsa-let-7g-3p			Experimentally Observed	1			1	FSTL1	ENSG00000163430		1	1	1
hsa-let-7g-3p			Experimentally Observed	1			1	FUS	ENSG00000089280	1			1
hsa-let-7g-3p			Experimentally Observed	1			1	FYCO1	ENSG00000163820	1	1	1	1
hsa-let-7g-3p			Experimentally Observed	1			1	G2E3	ENSG00000092140	1	1	1	1
hsa-let-7g-3p			Experimentally Observed	1			1	G3BP2	ENSG00000138757	1	1	1
hsa-let-7g-3p			Experimentally Observed	1			1	GALNT2	ENSG00000143641	1	1	1	1
hsa-let-7g-3p			Experimentally Observed	1			1	GNA13	ENSG00000120063		1		1
hsa-let-7g-3p			Experimentally Observed	1			1	GNPDA1	ENSG00000113552	1		1	1
hsa-let-7g-3p			Experimentally Observed	1			1	GPATCH2	ENSG00000092978
hsa-let-7g-3p			Experimentally Observed	1			1	GRB10	ENSG00000106070		1	1	1
hsa-let-7g-3p			Experimentally Observed	1			1	GSK3B	ENSG00000082701	1	1		1
hsa-let-7g-3p			Experimentally Observed	1			1	GSN	ENSG00000148180
hsa-let-7g-3p			Experimentally Observed	1			1	GTF2B	ENSG00000137947		1		1
hsa-let-7g-3p			Experimentally Observed	1			1	HAT1	ENSG00000128708
hsa-let-7g-3p			Experimentally Observed	1			1	HBP1	ENSG00000283847
hsa-let-7g-3p			Experimentally Observed	1			1	HELLS	ENSG00000119969
hsa-let-7g-3p			Experimentally Observed	1			1	HES5	ENSG00000273529
hsa-let-7g-3p			Experimentally Observed	1			1	HIPK3	ENSG00000110422	1
hsa-let-7g-3p			Experimentally Observed	1			1	HLTF	ENSG00000071794		1		1
hsa-let-7g-3p			Experimentally Observed	1			1	HMGCS1	ENSG00000112972	1	1		1
hsa-let-7g-3p			Experimentally Observed	1			1	HNRNPA2B1	ENSG00000122566	1	1	1	1
hsa-let-7g-3p			Experimentally Observed	1			1	HNRNPAB	ENSG00000197451
hsa-let-7g-3p			Experimentally Observed	1			1	HNRNPC	ENSG00000092199
hsa-let-7g-3p			Experimentally Observed	1			1	HNRNPH1	ENSG00000169045		1
hsa-let-7g-3p			Experimentally Observed	1			1	HNRNPL	ENSG00000282947
hsa-let-7g-3p			Experimentally Observed	1			1	HSP90AA1	ENSG00000080824
hsa-let-7g-3p			Experimentally Observed	1			1	ID4	ENSG00000172201	1	1		1
hsa-let-7g-3p			Experimentally Observed	1			1	INHBA	ENSG00000122641
hsa-let-7g-3p			Experimentally Observed	1			1	INO80B	ENSG00000115274	1
hsa-let-7g-3p			Experimentally Observed	1			1	INSIG2	ENSG00000125629	1	1	1	1
hsa-let-7g-3p			Experimentally Observed	1			1	IRS2	ENSG00000185950		1		1
hsa-let-7g-3p			Experimentally Observed	1			1	IRX3	ENSG00000177508
hsa-let-7g-3p			Experimentally Observed	1			1	ITGB1	ENSG00000150093		1		1
hsa-let-7g-3p			Experimentally Observed	1			1	ITSN1	ENSG00000205726
hsa-let-7g-3p			Experimentally Observed	1			1	JAM3	ENSG00000166086		1		1
hsa-let-7g-3p			Experimentally Observed	1			1	KIAA1109	ENSG00000138688
hsa-let-7g-3p			Experimentally Observed	1			1	KIF5B	ENSG00000170759	1	1	1	1
hsa-let-7g-3p			Experimentally Observed	1			1	KLF4	ENSG00000136826	1	1		1
hsa-let-7g-3p			Experimentally Observed	1			1	KLHDC3	ENSG00000124702	1	1
hsa-let-7g-3p			Experimentally Observed	1			1	KXD1	ENSG00000105700		1	1	1
hsa-let-7g-3p			Experimentally Observed	1			1	LARP1	ENSG00000155506
hsa-let-7g-3p			Experimentally Observed	1			1	LARP4	ENSG00000161813	1	1	1	1
hsa-let-7g-3p			Experimentally Observed	1			1	LCLAT1	ENSG00000172954	1		1	1
hsa-let-7g-3p			Experimentally Observed	1			1	LDLR	ENSG00000130164		1	1	1
hsa-let-7g-3p			Experimentally Observed	1			1	LEMD3	ENSG00000174106			1	1
hsa-let-7g-3p			Experimentally Observed	1			1	LENG8	ENSG00000276458
hsa-let-7g-3p			Experimentally Observed	1			1	LHFPL2	ENSG00000145685			1
hsa-let-7g-3p			Experimentally Observed	1			1	LIMCH1	ENSG00000064042	1		1	1
hsa-let-7g-3p			Experimentally Observed	1			1	LIMK2	ENSG00000182541
hsa-let-7g-3p			Experimentally Observed	1			1	LMO2	ENSG00000135363	1	1
hsa-let-7g-3p			Experimentally Observed	1			1	LNPEP	ENSG00000113441		1	1
hsa-let-7g-3p			Experimentally Observed	1			1	LPAR5	ENSG00000184574	1	1		1
hsa-let-7g-3p			Experimentally Observed	1			1	LRRC3B	ENSG00000179796		1
hsa-let-7g-3p			Experimentally Observed	1			1	LRRC57	ENSG00000180979
hsa-let-7g-3p			Experimentally Observed	1			1	LRRC58	ENSG00000163428		1		1
hsa-let-7g-3p			Experimentally Observed	1			1	LTN1	ENSG00000198862	1	1		1
hsa-let-7g-3p			Experimentally Observed	1			1	MAGED2	ENSG00000102316
hsa-let-7g-3p			Experimentally Observed	1			1	MAP1LC3B	ENSG00000140941			1	1
hsa-let-7g-3p			Experimentally Observed	1			1	MAP2K4	ENSG00000065559	1	1	1	1
hsa-let-7g-3p			Experimentally Observed	1			1	MAP3K12	ENSG00000139625	1	1
hsa-let-7g-3p			Experimentally Observed	1			1	MAP7	ENSG00000135525		1	1	1
hsa-let-7g-3p			Experimentally Observed	1			1	MARCH7	ENSG00000136536	1	1	1	1
hsa-let-7g-3p			Experimentally Observed	1			1	MAZ	ENSG00000103495			1
hsa-let-7g-3p			Experimentally Observed	1			1	MBD2	ENSG00000134046	1	1	1	1
hsa-let-7g-3p			Experimentally Observed	1			1	MDH1	ENSG00000014641
hsa-let-7g-3p			Experimentally Observed	1			1	MED17	ENSG00000042429	1	1		1
hsa-let-7g-3p			Experimentally Observed	1			1	MEF2D	ENSG00000116604		1		1
hsa-let-7g-3p			Experimentally Observed	1			1	MEGF9	ENSG00000106780	1	1	1	1
hsa-let-7g-3p			Experimentally Observed	1			1	MKNK2	ENSG00000099875		1		1
hsa-let-7g-3p			Experimentally Observed	1			1	MOSPD1	ENSG00000101928		1		1
hsa-let-7g-3p			Experimentally Observed	1			1	MRPL42	ENSG00000198015	1	1	1	1
hsa-let-7g-3p			Experimentally Observed	1			1	MTF2	ENSG00000143033	1	1		1
hsa-let-7g-3p			Experimentally Observed	1			1	MTMR12	ENSG00000150712	1	1	1	1
hsa-let-7g-3p			Experimentally Observed	1			1	MTMR3	ENSG00000100330		1		1
hsa-let-7g-3p			Experimentally Observed	1			1	MYH14	ENSG00000105357
hsa-let-7g-3p			Experimentally Observed	1			1	MYL12B	ENSG00000118680
hsa-let-7g-3p			Experimentally Observed	1			1	MYL6B	ENSG00000196465
hsa-let-7g-3p			Experimentally Observed	1			1	MYO1E	ENSG00000157483		1
hsa-let-7g-3p			Experimentally Observed	1			1	NAT8L	ENSG00000185818		1
hsa-let-7g-3p			Experimentally Observed	1			1	NBR1	ENSG00000188554		1		1
hsa-let-7g-3p			Experimentally Observed	1			1	NCOA5	ENSG00000124160
hsa-let-7g-3p			Experimentally Observed	1			1	NCOR1	ENSG00000141027		1		1
hsa-let-7g-3p			Experimentally Observed	1			1	NDFIP1	ENSG00000131507		1		1
hsa-let-7g-3p			Experimentally Observed	1			1	NFE2L1	ENSG00000082641		1	1	1
hsa-let-7g-3p			Experimentally Observed	1			1	NOP56	ENSG00000101361
hsa-let-7g-3p			Experimentally Observed	1			1	NPAS3	ENSG00000151322		1		1
hsa-let-7g-3p			Experimentally Observed	1			1	NPTX1	ENSG00000171246	1	1	1	1
hsa-let-7g-3p			Experimentally Observed	1			1	NR2F1	ENSG00000175745		1
hsa-let-7g-3p			Experimentally Observed	1			1	NR3C1	ENSG00000113580			1	1
hsa-let-7g-3p			Experimentally Observed	1			1	NUFIP2	ENSG00000108256		1		1
hsa-let-7g-3p			Experimentally Observed	1			1	NXT1	ENSG00000132661
hsa-let-7g-3p			Experimentally Observed	1			1	OGDH	ENSG00000105953			1
hsa-let-7g-3p			Experimentally Observed	1			1	OSMR	ENSG00000145623	1	1	1	1
hsa-let-7g-3p			Experimentally Observed	1			1	PALM2-AKAP2	ENSG00000157654
hsa-let-7g-3p			Experimentally Observed	1			1	PARD6B	ENSG00000124171		1	1	1
hsa-let-7g-3p			Experimentally Observed	1			1	PAXBP1	ENSG00000263141
hsa-let-7g-3p			Experimentally Observed	1			1	PCGF5	ENSG00000180628		1		1
hsa-let-7g-3p			Experimentally Observed	1			1	PCSK1	ENSG00000175426
hsa-let-7g-3p			Experimentally Observed	1			1	PDCD4	ENSG00000150593		1	1	1
hsa-let-7g-3p			Experimentally Observed	1			1	PIEZO1	ENSG00000103335		1		1
hsa-let-7g-3p			Experimentally Observed	1			1	PKMYT1	ENSG00000127564
hsa-let-7g-3p			Experimentally Observed	1			1	PLEKHB2	ENSG00000115762	1	1		1
hsa-let-7g-3p			Experimentally Observed	1			1	PLXNA1	ENSG00000114554				1
hsa-let-7g-3p			Experimentally Observed	1			1	PNRC2	ENSG00000189266		1		1
hsa-let-7g-3p			Experimentally Observed	1			1	POGZ	ENSG00000143442	1	1	1	1
hsa-let-7g-3p			Experimentally Observed	1			1	POMP	ENSG00000132963		1
hsa-let-7g-3p			Experimentally Observed	1			1	POU2F1	ENSG00000143190		1		1
hsa-let-7g-3p			Experimentally Observed	1			1	PPP1R15B	ENSG00000158615
hsa-let-7g-3p			Experimentally Observed	1			1	PPP1R7	ENSG00000115685
hsa-let-7g-3p			Experimentally Observed	1			1	PPP6C	ENSG00000119414	1	1	1	1
hsa-let-7g-3p			Experimentally Observed	1			1	PPRC1	ENSG00000148840		1
hsa-let-7g-3p			Experimentally Observed	1			1	PRMT5	ENSG00000100462
hsa-let-7g-3p			Experimentally Observed	1			1	PSMB2	ENSG00000126067			1	1
hsa-let-7g-3p			Experimentally Observed	1			1	PSMB3	ENSG00000275903
hsa-let-7g-3p			Experimentally Observed	1			1	PSME4	ENSG00000068878	1		1	1
hsa-let-7g-3p			Experimentally Observed	1			1	PTP4A1	ENSG00000112245	1	1		1
hsa-let-7g-3p			Experimentally Observed	1			1	PTPN1	ENSG00000196396	1		1	1
hsa-let-7g-3p			Experimentally Observed	1			1	PTPN14	ENSG00000152104	1	1	1	1
hsa-let-7g-3p			Experimentally Observed	1			1	PTPN3	ENSG00000070159	1	1	1	1
hsa-let-7g-3p			Experimentally Observed	1			1	PTPRJ	ENSG00000149177		1		1
hsa-let-7g-3p			Experimentally Observed	1			1	PUM1	ENSG00000134644		1		1
hsa-let-7g-3p			Experimentally Observed	1			1	PUM2	ENSG00000055917		1	1	1
hsa-let-7g-3p			Experimentally Observed	1			1	RAB18	ENSG00000099246			1	1
hsa-let-7g-3p			Experimentally Observed	1			1	RAB3C	ENSG00000152932		1
hsa-let-7g-3p			Experimentally Observed	1			1	RAB8B	ENSG00000166128				1
hsa-let-7g-3p			Experimentally Observed	1			1	RABAC1	ENSG00000105404
hsa-let-7g-3p			Experimentally Observed	1			1	RABL6	ENSG00000196642
hsa-let-7g-3p			Experimentally Observed	1			1	RAPH1	ENSG00000173166	1	1	1	1
hsa-let-7g-3p			Experimentally Observed	1			1	RBM25	ENSG00000119707		1	1	1
hsa-let-7g-3p			Experimentally Observed	1			1	RBM26	ENSG00000139746			1
hsa-let-7g-3p			Experimentally Observed	1			1	RBM6	ENSG00000004534		1
hsa-let-7g-3p			Experimentally Observed	1			1	RCC1	ENSG00000180198		1	1	1
hsa-let-7g-3p			Experimentally Observed	1			1	RCC2	ENSG00000281540
hsa-let-7g-3p			Experimentally Observed	1			1	RCN2	ENSG00000117906		1		1
hsa-let-7g-3p			Experimentally Observed	1			1	RELT	ENSG00000054967
hsa-let-7g-3p			Experimentally Observed	1			1	RNF141	ENSG00000110315	1	1	1	1
hsa-let-7g-3p			Experimentally Observed	1			1	RNF213	ENSG00000173821				1
hsa-let-7g-3p			Experimentally Observed	1			1	RNF220	ENSG00000187147	1	1	1	1
hsa-let-7g-3p			Experimentally Observed	1			1	RORA	ENSG00000069667	1	1		1
hsa-let-7g-3p			Experimentally Observed	1			1	RPS19	ENSG00000105372
hsa-let-7g-3p			Experimentally Observed	1			1	RREB1	ENSG00000124782	1	1	1	1
hsa-let-7g-3p			Experimentally Observed	1			1	RRM1	ENSG00000167325
hsa-let-7g-3p			Experimentally Observed	1			1	RUFY2	ENSG00000204130		1	1	1
hsa-let-7g-3p			Experimentally Observed	1			1	RUFY3	ENSG00000018189		1	1	1
hsa-let-7g-3p			Experimentally Observed	1			1	SAMD4B	ENSG00000179134			1	1
hsa-let-7g-3p			Experimentally Observed	1			1	SBF1	ENSG00000100241		1		1
hsa-let-7g-3p			Experimentally Observed	1			1	SC5D	ENSG00000109929
hsa-let-7g-3p			Experimentally Observed	1			1	SCAF8	ENSG00000213079		1
hsa-let-7g-3p			Experimentally Observed	1			1	SCAMP1	ENSG00000085365		1		1
hsa-let-7g-3p			Experimentally Observed	1			1	SEC23IP	ENSG00000107651		1		1
hsa-let-7g-3p			Experimentally Observed	1			1	SEC61A1	ENSG00000058262	1	1	1	1
hsa-let-7g-3p			Experimentally Observed	1			1	SETD1A	ENSG00000099381		1
hsa-let-7g-3p			Experimentally Observed	1			1	SF3B1	ENSG00000115524		1
hsa-let-7g-3p			Experimentally Observed	1			1	SKIL	ENSG00000136603	1	1	1
hsa-let-7g-3p			Experimentally Observed	1			1	SLAIN2	ENSG00000109171	1	1	1	1
hsa-let-7g-3p			Experimentally Observed	1			1	SLC11A2	ENSG00000110911		1	1	1
hsa-let-7g-3p			Experimentally Observed	1			1	SLC2A3	ENSG00000059804	1	1	1	1
hsa-let-7g-3p			Experimentally Observed	1			1	SLC39A10	ENSG00000196950		1		1
hsa-let-7g-3p			Experimentally Observed	1			1	SLC7A11	ENSG00000151012		1	1	1
hsa-let-7g-3p			Experimentally Observed	1			1	SLC7A2	ENSG00000003989		1		1
hsa-let-7g-3p			Experimentally Observed	1			1	SLC7A6	ENSG00000103064	1		1	1
hsa-let-7g-3p			Experimentally Observed	1			1	SLC9A1	ENSG00000090020		1		1
hsa-let-7g-3p			Experimentally Observed	1			1	SLIT2	ENSG00000145147
hsa-let-7g-3p			Experimentally Observed	1			1	SNRPB	ENSG00000125835		1
hsa-let-7g-3p			Experimentally Observed	1			1	SNX13	ENSG00000071189	1	1	1	1
hsa-let-7g-3p			Experimentally Observed	1			1	SNX9	ENSG00000130340	1	1	1	1
hsa-let-7g-3p			Experimentally Observed	1			1	SPARC	ENSG00000113140				1
hsa-let-7g-3p			Experimentally Observed	1			1	SPATA2	ENSG00000158480	1	1	1	1
hsa-let-7g-3p			Experimentally Observed	1			1	SPEN	ENSG00000065526		1		1
hsa-let-7g-3p			Experimentally Observed	1			1	SPTBN1	ENSG00000115306	1	1		1
hsa-let-7g-3p			Experimentally Observed	1			1	SREBF1	ENSG00000072310	1	1	1	1
hsa-let-7g-3p			Experimentally Observed	1			1	SRGAP2	ENSG00000266028
hsa-let-7g-3p			Experimentally Observed	1			1	SRM	ENSG00000116649
hsa-let-7g-3p			Experimentally Observed	1			1	STARD7	ENSG00000084090	1	1	1	1
hsa-let-7g-3p			Experimentally Observed	1			1	STK39	ENSG00000198648	1	1	1
hsa-let-7g-3p			Experimentally Observed	1			1	SYNCRIP	ENSG00000135316		1	1	1
hsa-let-7g-3p			Experimentally Observed	1			1	SYNGAP1	ENSG00000197283		1	1
hsa-let-7g-3p			Experimentally Observed	1			1	SYNJ1	ENSG00000159082		1		1
hsa-let-7g-3p			Experimentally Observed	1			1	TAOK1	ENSG00000160551		1		1
hsa-let-7g-3p			Experimentally Observed	1			1	TGFBR1	ENSG00000106799	1		1	1
hsa-let-7g-3p			Experimentally Observed	1			1	TGFBR2	ENSG00000163513	1	1	1	1
hsa-let-7g-3p			Experimentally Observed	1			1	THAP3	ENSG00000041988		1	1	1
hsa-let-7g-3p			Experimentally Observed	1			1	TIMP2	ENSG00000035862		1		1
hsa-let-7g-3p			Experimentally Observed	1			1	TJP1	ENSG00000104067	1	1	1	1
hsa-let-7g-3p			Experimentally Observed	1			1	TLE4	ENSG00000106829		1		1
hsa-let-7g-3p			Experimentally Observed	1			1	TMEM123	ENSG00000152558		1		1
hsa-let-7g-3p			Experimentally Observed	1			1	TMEM136	ENSG00000181264			1	1
hsa-let-7g-3p			Experimentally Observed	1			1	TMEM209	ENSG00000146842			1
hsa-let-7g-3p			Experimentally Observed	1			1	TMEM55B	ENSG00000165782		1		1
hsa-let-7g-3p			Experimentally Observed	1			1	TMF1	ENSG00000144747
hsa-let-7g-3p			Experimentally Observed	1			1	TNKS2	ENSG00000107854		1		1
hsa-let-7g-3p			Experimentally Observed	1			1	TNRC6A	ENSG00000090905	1	1	1	1
hsa-let-7g-3p			Experimentally Observed	1			1	TNRC6B	ENSG00000100354	1	1
hsa-let-7g-3p			Experimentally Observed	1			1	TNRC6C	ENSG00000078687	1	1	1	1
hsa-let-7g-3p			Experimentally Observed	1			1	TP53BP2	ENSG00000143514		1
hsa-let-7g-3p			Experimentally Observed	1			1	TRIM44	ENSG00000166326		1	1	1
hsa-let-7g-3p			Experimentally Observed	1			1	TRMT1	ENSG00000104907
hsa-let-7g-3p			Experimentally Observed	1			1	TRRAP	ENSG00000196367
hsa-let-7g-3p			Experimentally Observed	1			1	TULP4	ENSG00000130338	1	1	1	1
hsa-let-7g-3p			Experimentally Observed	1			1	TVP23B	ENSG00000171928		1		1
hsa-let-7g-3p			Experimentally Observed	1			1	TXNIP	ENSG00000265972
hsa-let-7g-3p			Experimentally Observed	1			1	UBQLN1	ENSG00000135018		1	1	1
hsa-let-7g-3p			Experimentally Observed	1			1	UBR4	ENSG00000127481		1
hsa-let-7g-3p			Experimentally Observed	1			1	UHMK1	ENSG00000152332		1		1
hsa-let-7g-3p			Experimentally Observed	1			1	UMPS	ENSG00000114491		1		1
hsa-let-7g-3p			Experimentally Observed	1			1	UQCC2	ENSG00000137288
hsa-let-7g-3p			Experimentally Observed	1			1	USP11	ENSG00000102226
hsa-let-7g-3p			Experimentally Observed	1			1	USP2	ENSG00000036672	1		1	1
hsa-let-7g-3p			Experimentally Observed	1			1	VAMP3	ENSG00000049245		1		1
hsa-let-7g-3p			Experimentally Observed	1			1	VAT1	ENSG00000108828		1	1	1
hsa-let-7g-3p			Experimentally Observed	1			1	VDAC1	ENSG00000213585	1		1
hsa-let-7g-3p			Experimentally Observed	1			1	VGLL4	ENSG00000144560	1	1	1	1
hsa-let-7g-3p			Experimentally Observed	1			1	VPS13D	ENSG00000048707		1		1
hsa-let-7g-3p			Experimentally Observed	1			1	WBP11	ENSG00000084463		1		1
hsa-let-7g-3p			Experimentally Observed	1			1	WDR37	ENSG00000047056		1	1	1
hsa-let-7g-3p			Experimentally Observed	1			1	WDR6	ENSG00000178252	1		1
hsa-let-7g-3p			Experimentally Observed	1			1	WEE1	ENSG00000166483		1		1
hsa-let-7g-3p			Experimentally Observed	1			1	WIZ	ENSG00000011451
hsa-let-7g-3p			Experimentally Observed	1			1	WWC2	ENSG00000151718		1		1
hsa-let-7g-3p			Experimentally Observed	1			1	XK	ENSG00000047597
hsa-let-7g-3p			Experimentally Observed	1			1	YAP1	ENSG00000137693		1		1
hsa-let-7g-3p			Experimentally Observed	1			1	YTHDF3	ENSG00000185728		1		1
hsa-let-7g-3p			Experimentally Observed	1			1	ZBED5	ENSG00000236287
hsa-let-7g-3p			Experimentally Observed	1			1	ZBTB44	ENSG00000196323		1		1
hsa-let-7g-3p			Experimentally Observed	1			1	ZC3H6	ENSG00000188177		1		1
hsa-let-7g-3p			Experimentally Observed	1			1	ZFAND5	ENSG00000107372		1		1
hsa-let-7g-3p			Experimentally Observed	1			1	ZIC2	ENSG00000043355		1		1
hsa-let-7g-3p			Experimentally Observed	1			1	ZMAT2	ENSG00000146007	1	1	1
hsa-let-7g-3p			Experimentally Observed	1			1	ZMIZ1	ENSG00000108175		1	1
hsa-let-7g-3p			Experimentally Observed	1			1	ZMYM2	ENSG00000121741		1		1
hsa-let-7g-3p			Experimentally Observed	1			1	ZNF217	ENSG00000171940	1	1	1	1
hsa-let-7g-3p			Experimentally Observed	1			1	ZNF24	ENSG00000172466	1	1		1
hsa-let-7g-3p			Experimentally Observed	1			1	ZNF326	ENSG00000162664		1		1
hsa-let-7g-3p			Experimentally Observed	1			1	ZNF451	ENSG00000112200	1		1	1
hsa-let-7g-3p			Experimentally Observed	1			1	ZNF507	ENSG00000168813	1	1	1	1
hsa-let-7g-3p			Experimentally Observed	1			1	ZNF514	ENSG00000144026		1	1	1
hsa-let-7g-3p			Experimentally Observed	1			1	ZNF609	ENSG00000180357	1	1	1	1
hsa-let-7g-3p			Experimentally Observed	1			1	ZNF711	ENSG00000147180	1		1
hsa-let-7g-3p			Experimentally Observed	1			1	ZNF721	ENSG00000182903	1		1	1
hsa-let-7g-3p			Experimentally Observed	1			1	ZSCAN29	ENSG00000140265	1	1	1	1
hsa-let-7g-3p	1		High (predicted)					ABTB2	ENSG00000166016	1	1	1	1
hsa-let-7g-3p	1		High (predicted)					ANP32B	ENSG00000136938		1
hsa-let-7g-3p	1		High (predicted)					AP4M1	ENSG00000221838		1
hsa-let-7g-3p	1		High (predicted)					ATL2	ENSG00000119787		1		1
hsa-let-7g-3p	1		High (predicted)					BAZ1A	ENSG00000198604	1
hsa-let-7g-3p	1		High (predicted)					BBC3	ENSG00000105327		1		1
hsa-let-7g-3p	1		High (predicted)					BCL2	ENSG00000171791		1	1	1
hsa-let-7g-3p	1		High (predicted)					C1QBP	ENSG00000108561		1
hsa-let-7g-3p	1		High (predicted)					C5orf15	ENSG00000113583		1	1	1
hsa-let-7g-3p	1		High (predicted)					CADM2	ENSG00000175161		1	1	1
hsa-let-7g-3p	1		High (predicted)					CTSS	ENSG00000163131		1	1	1
hsa-let-7g-3p	1		High (predicted)					CUL1	ENSG00000055130	1	1
hsa-let-7g-3p	1		High (predicted)					DCTN2	ENSG00000175203		1	1
hsa-let-7g-3p	1		High (predicted)					DENR	ENSG00000139726		1	1	1
hsa-let-7g-3p	1		High (predicted)					FBXO34	ENSG00000178974		1		1
hsa-let-7g-3p	1		High (predicted)					FOXO1	ENSG00000150907	1	1	1	1
hsa-let-7g-3p	1		High (predicted)					GNPDA2	ENSG00000163281		1
hsa-let-7g-3p	1		High (predicted)					GSTM2	ENSG00000213366				1
hsa-let-7g-3p	1		High (predicted)					GYG1	ENSG00000163754				1
hsa-let-7g-3p	1		High (predicted)					HMGN1	ENSG00000205581		1
hsa-let-7g-3p	1		High (predicted)					INSIG1	ENSG00000186480	1	1		1
hsa-let-7g-3p	1		High (predicted)					IQCK	ENSG00000174628		1	1	1
hsa-let-7g-3p	1		High (predicted)					ITGA1	ENSG00000213949	1		1	1
hsa-let-7g-3p	1		High (predicted)					JDP2	ENSG00000140044				1
hsa-let-7g-3p	1		High (predicted)					JPT1	ENSG00000189159		1		1
hsa-let-7g-3p	1		High (predicted)					KCNJ6	ENSG00000157542		1		1
hsa-let-7g-3p	1		High (predicted)					LETM2	ENSG00000165046		1
hsa-let-7g-3p	1		High (predicted)					MAP6D1	ENSG00000180834	1	1	1	1
hsa-let-7g-3p	1		High (predicted)					MBTD1	ENSG00000011258	1	1	1	1
hsa-let-7g-3p	1		High (predicted)					MEA1	ENSG00000124733		1		1
hsa-let-7g-3p	1		High (predicted)					METTL21A	ENSG00000144401		1		1
hsa-let-7g-3p	1		High (predicted)					MFNG	ENSG00000100060	1	1	1	1
hsa-let-7g-3p	1		High (predicted)					MSH3	ENSG00000113318		1
hsa-let-7g-3p	1		High (predicted)					PAPSS2	ENSG00000198682	1	1	1	1
hsa-let-7g-3p	1		High (predicted)					PATE3	ENSG00000236027			1	1
hsa-let-7g-3p	1		High (predicted)					PEX11B	ENSG00000131779		1
hsa-let-7g-3p	1		High (predicted)					PPEF1	ENSG00000086717	1		1	1
hsa-let-7g-3p	1		High (predicted)					RB1CC1	ENSG00000023287	1	1		1
hsa-let-7g-3p	1		High (predicted)					RBMS1	ENSG00000153250	1	1	1	1
hsa-let-7g-3p	1		High (predicted)					RHBDL2	ENSG00000158315	1	1	1	1
hsa-let-7g-3p	1		High (predicted)					RPL23A	ENSG00000198242				1
hsa-let-7g-3p	1		High (predicted)					RTL8A	ENSG00000203950				1
hsa-let-7g-3p	1		High (predicted)					SCN8A	ENSG00000196876		1		1
hsa-let-7g-3p	1		High (predicted)					SHC3	ENSG00000148082	1	1		1
hsa-let-7g-3p	1		High (predicted)					SNCA	ENSG00000145335	1	1	1	1
hsa-let-7g-3p	1		High (predicted)					SPARCL1	ENSG00000152583		1
hsa-let-7g-3p	1		High (predicted)					SRP19	ENSG00000153037		1
hsa-let-7g-3p	1		High (predicted)					STXBP5L	ENSG00000145087	1	1	1	1
hsa-let-7g-3p	1		High (predicted)					TBP	ENSG00000112592		1		1
hsa-let-7g-3p	1		High (predicted)					TPMT	ENSG00000137364		1	1	1
hsa-let-7g-3p	1		High (predicted)					TRNP1	ENSG00000253368			1	1
hsa-let-7g-3p	1		High (predicted)					TSPAN3	ENSG00000140391		1		1
hsa-let-7g-3p	1		High (predicted)					UCK2	ENSG00000143179	1	1	1	1
hsa-let-7g-3p	1		High (predicted)					VANGL2	ENSG00000162738	1	1	1	1
hsa-let-7g-3p	1		High (predicted)					ZNF117	ENSG00000152926			1	1
hsa-let-7g-3p	1		High (predicted)					ZNF143	ENSG00000166478			1
hsa-let-7g-3p	1		High (predicted)					ZNF169	ENSG00000175787	1		1	1
hsa-let-7g-3p	1		Moderate (predicted)					ABCC5	ENSG00000114770	1	1	1	1
hsa-let-7g-3p	1		Moderate (predicted)					ACER2	ENSG00000177076	1		1	1
hsa-let-7g-3p	1		Moderate (predicted)					ACTG1	ENSG00000184009		1
hsa-let-7g-3p	1		Moderate (predicted)					ACVR1B	ENSG00000135503		1	1	1
hsa-let-7g-3p	1		Moderate (predicted)					ADGRL2	ENSG00000117114	1	1		1
hsa-let-7g-3p	1		Moderate (predicted)					ADRA1A	ENSG00000120907		1		1
hsa-let-7g-3p	1		Moderate (predicted)					AGPAT4	ENSG00000026652		1	1	1
hsa-let-7g-3p	1		Moderate (predicted)					AKAP1	ENSG00000121057		1
hsa-let-7g-3p	1		Moderate (predicted)					AKAP7	ENSG00000118507		1	1	1
hsa-let-7g-3p	1		Moderate (predicted)					ALDH8A1	ENSG00000118514			1	1
hsa-let-7g-3p	1		Moderate (predicted)					ALDH9A1	ENSG00000143149				1
hsa-let-7g-3p	1		Moderate (predicted)					ALKBH8	ENSG00000137760	1	1	1	1
hsa-let-7g-3p	1		Moderate (predicted)					ALS2CL	ENSG00000178038	1	1		1
hsa-let-7g-3p	1		Moderate (predicted)					ANK2	ENSG00000145362		1	1	1
hsa-let-7g-3p	1		Moderate (predicted)					ANOS1	ENSG00000011201		1		1
hsa-let-7g-3p	1		Moderate (predicted)					AP3S1	ENSG00000177879		1		1
hsa-let-7g-3p	1		Moderate (predicted)					APOO	ENSG00000184831		1
hsa-let-7g-3p	1		Moderate (predicted)					APPL1	ENSG00000157500	1	1	1	1
hsa-let-7g-3p	1		Moderate (predicted)					ARHGAP15	ENSG00000075884	1
hsa-let-7g-3p	1		Moderate (predicted)					ARHGEF10L	ENSG00000074964		1
hsa-let-7g-3p	1		Moderate (predicted)					ARID4B	ENSG00000054267		1		1
hsa-let-7g-3p	1		Moderate (predicted)					ARL8B	ENSG00000134108	1		1	1
hsa-let-7g-3p	1		Moderate (predicted)					ARX	ENSG00000004848		1
hsa-let-7g-3p	1		Moderate (predicted)					ATG101	ENSG00000123395		1	1	1
hsa-let-7g-3p	1		Moderate (predicted)					ATP10B	ENSG00000118322	1	1	1	1
hsa-let-7g-3p	1		Moderate (predicted)					ATP13A3	ENSG00000133657	1	1	1	1
hsa-let-7g-3p	1		Moderate (predicted)					AZI2	ENSG00000163512		1		1
hsa-let-7g-3p	1		Moderate (predicted)					B3GNT9	ENSG00000237172	1	1	1	1
hsa-let-7g-3p	1		Moderate (predicted)					B4GALT4	ENSG00000121578	1	1		1
hsa-let-7g-3p	1		Moderate (predicted)					BACH2	ENSG00000112182	1	1		1
hsa-let-7g-3p	1		Moderate (predicted)					BCL6	ENSG00000113916	1	1		1
hsa-let-7g-3p	1		Moderate (predicted)					BEND6	ENSG00000151917	1	1	1	1
hsa-let-7g-3p	1		Moderate (predicted)					BRI3	ENSG00000164713		1
hsa-let-7g-3p	1		Moderate (predicted)					BRINP1	ENSG00000078725	1	1		1
hsa-let-7g-3p	1		Moderate (predicted)					C10orf88	ENSG00000119965		1
hsa-let-7g-3p	1		Moderate (predicted)					C16orf62	ENSG00000103544			1
hsa-let-7g-3p	1		Moderate (predicted)					C19orf73	ENSG00000221916		1
hsa-let-7g-3p	1		Moderate (predicted)					C1orf112	ENSG00000000460		1
hsa-let-7g-3p	1		Moderate (predicted)					C2orf88	ENSG00000187699	1		1	1
hsa-let-7g-3p	1		Moderate (predicted)					C5orf30	ENSG00000181751	1	1		1
hsa-let-7g-3p	1		Moderate (predicted)					C9orf64	ENSG00000165118	1	1	1	1
hsa-let-7g-3p	1		Moderate (predicted)					CAMK2N1	ENSG00000162545		1	1	1
hsa-let-7g-3p	1		Moderate (predicted)					CAMTA1	ENSG00000171735	1	1	1	1
hsa-let-7g-3p	1		Moderate (predicted)					CARD6	ENSG00000132357				1
hsa-let-7g-3p	1		Moderate (predicted)					CARTPT	ENSG00000164326		1
hsa-let-7g-3p	1		Moderate (predicted)					CCDC126	ENSG00000169193	1	1	1	1
hsa-let-7g-3p	1		Moderate (predicted)					CCDC186	ENSG00000165813			1	1
hsa-let-7g-3p	1		Moderate (predicted)					CCNB1	ENSG00000134057		1
hsa-let-7g-3p	1		Moderate (predicted)					CDADC1	ENSG00000102543	1		1	1
hsa-let-7g-3p	1		Moderate (predicted)					CDH10	ENSG00000040731	1	1	1
hsa-let-7g-3p	1		Moderate (predicted)					CDH11	ENSG00000140937		1
hsa-let-7g-3p	1		Moderate (predicted)					CDK8	ENSG00000132964		1
hsa-let-7g-3p	1		Moderate (predicted)					CDYL	ENSG00000153046		1		1
hsa-let-7g-3p	1		Moderate (predicted)					CHRAC1	ENSG00000104472		1	1	1
hsa-let-7g-3p	1		Moderate (predicted)					CITED2	ENSG00000164442		1
hsa-let-7g-3p	1		Moderate (predicted)					CKS2	ENSG00000123975		1
hsa-let-7g-3p	1		Moderate (predicted)					CLDN11	ENSG00000013297		1		1
hsa-let-7g-3p	1		Moderate (predicted)					CLVS1	ENSG00000177182		1	1	1
hsa-let-7g-3p	1		Moderate (predicted)					CNRIP1	ENSG00000119865		1
hsa-let-7g-3p	1		Moderate (predicted)					COA7	ENSG00000162377		1		1
hsa-let-7g-3p	1		Moderate (predicted)					COG3	ENSG00000136152		1		1
hsa-let-7g-3p	1		Moderate (predicted)					COL4A3BP	ENSG00000113163	1	1	1	1
hsa-let-7g-3p	1		Moderate (predicted)					COL8A1	ENSG00000144810		1
hsa-let-7g-3p	1		Moderate (predicted)					CPNE8	ENSG00000139117		1		1
hsa-let-7g-3p	1		Moderate (predicted)					CPSF1	ENSG00000071894		1
hsa-let-7g-3p	1		Moderate (predicted)					CSPG5	ENSG00000114646		1		1
hsa-let-7g-3p	1		Moderate (predicted)					CSRNP2	ENSG00000110925	1	1		1
hsa-let-7g-3p	1		Moderate (predicted)					CTDSPL2	ENSG00000137770		1		1
hsa-let-7g-3p	1		Moderate (predicted)					CTHRC1	ENSG00000164932		1
hsa-let-7g-3p	1		Moderate (predicted)					CXorf40A	ENSG00000197620			1	1
hsa-let-7g-3p	1		Moderate (predicted)					CXorf40B	ENSG00000197021				1
hsa-let-7g-3p	1		Moderate (predicted)					DAZAP2	ENSG00000183283	1	1	1	1
hsa-let-7g-3p	1		Moderate (predicted)					DGKA	ENSG00000065357		1
hsa-let-7g-3p	1		Moderate (predicted)					DIDO1	ENSG00000101191		1	1	1
hsa-let-7g-3p	1		Moderate (predicted)					DLX1	ENSG00000144355		1		1
hsa-let-7g-3p	1		Moderate (predicted)					DOCK9	ENSG00000088387	1	1	1	1
hsa-let-7g-3p	1		Moderate (predicted)					DSCAML1	ENSG00000177103		1	1
hsa-let-7g-3p	1		Moderate (predicted)					DYRK4	ENSG00000010219		1
hsa-let-7g-3p	1		Moderate (predicted)					EIF4E	ENSG00000151247	1	1		1
hsa-let-7g-3p	1		Moderate (predicted)					EIF4E3	ENSG00000163412		1	1	1
hsa-let-7g-3p	1		Moderate (predicted)					FABP3	ENSG00000121769				1
hsa-let-7g-3p	1		Moderate (predicted)					FAHD1	ENSG00000180185	1		1	1
hsa-let-7g-3p	1		Moderate (predicted)					FAM13C	ENSG00000148541		1		1
hsa-let-7g-3p	1		Moderate (predicted)					FAM189A1	ENSG00000104059		1	1	1
hsa-let-7g-3p	1		Moderate (predicted)					FAM43A	ENSG00000185112		1		1
hsa-let-7g-3p	1		Moderate (predicted)					FBXL3	ENSG00000005812	1	1	1	1
hsa-let-7g-3p	1		Moderate (predicted)					FLI1	ENSG00000151702		1
hsa-let-7g-3p	1		Moderate (predicted)					FMR1	ENSG00000102081	1	1		1
hsa-let-7g-3p	1		Moderate (predicted)					FUBP1	ENSG00000162613	1	1	1
hsa-let-7g-3p	1		Moderate (predicted)					FUT9	ENSG00000172461	1	1	1	1
hsa-let-7g-3p	1		Moderate (predicted)					FXR2	ENSG00000129245		1		1
hsa-let-7g-3p	1		Moderate (predicted)					FZD4	ENSG00000174804		1		1
hsa-let-7g-3p	1		Moderate (predicted)					GABRA5	ENSG00000186297	1	1	1
hsa-let-7g-3p	1		Moderate (predicted)					GABRB2	ENSG00000145864		1		1
hsa-let-7g-3p	1		Moderate (predicted)					GAK	ENSG00000178950		1	1
hsa-let-7g-3p	1		Moderate (predicted)					GAS1	ENSG00000180447	1	1	1	1
hsa-let-7g-3p	1		Moderate (predicted)					GCLC	ENSG00000001084	1	1		1
hsa-let-7g-3p	1		Moderate (predicted)					GEMIN8	ENSG00000046647			1	1
hsa-let-7g-3p	1		Moderate (predicted)					GHITM	ENSG00000165678		1	1	1
hsa-let-7g-3p	1		Moderate (predicted)					GLRB	ENSG00000109738				1
hsa-let-7g-3p	1		Moderate (predicted)					GMCL1	ENSG00000087338		1
hsa-let-7g-3p	1		Moderate (predicted)					GNAL	ENSG00000141404	1	1	1	1
hsa-let-7g-3p	1		Moderate (predicted)					GNG11	ENSG00000127920		1	1
hsa-let-7g-3p	1		Moderate (predicted)					GNG12	ENSG00000172380		1	1	1
hsa-let-7g-3p	1		Moderate (predicted)					GPM6B	ENSG00000046653		1	1	1
hsa-let-7g-3p	1		Moderate (predicted)					GPR108	ENSG00000125734		1
hsa-let-7g-3p	1		Moderate (predicted)					GRM7	ENSG00000196277	1	1		1
hsa-let-7g-3p	1		Moderate (predicted)					GRPEL2	ENSG00000164284		1	1	1
hsa-let-7g-3p	1		Moderate (predicted)					GTF2H3	ENSG00000111358		1
hsa-let-7g-3p	1		Moderate (predicted)					GTF2IRD1	ENSG00000006704		1
hsa-let-7g-3p	1		Moderate (predicted)					GUCA1A	ENSG00000048545	1		1
hsa-let-7g-3p	1		Moderate (predicted)					HAPLN1	ENSG00000145681	1	1	1	1
hsa-let-7g-3p	1		Moderate (predicted)					HECTD2	ENSG00000165338		1	1	1
hsa-let-7g-3p	1		Moderate (predicted)					HGF	ENSG00000019991	1	1	1	1
hsa-let-7g-3p	1		Moderate (predicted)					HID1	ENSG00000167861		1		1
hsa-let-7g-3p	1		Moderate (predicted)					HMGB1	ENSG00000189403		1	1	1
hsa-let-7g-3p	1		Moderate (predicted)					HMGN2	ENSG00000198830		1	1	1
hsa-let-7g-3p	1		Moderate (predicted)					HOMER1	ENSG00000152413	1		1	1
hsa-let-7g-3p	1		Moderate (predicted)					HS6ST2	ENSG00000171004		1		1
hsa-let-7g-3p	1		Moderate (predicted)					HS6ST3	ENSG00000185352	1		1	1
hsa-let-7g-3p	1		Moderate (predicted)					HSPB6	ENSG00000004776			1
hsa-let-7g-3p	1		Moderate (predicted)					IFRD1	ENSG00000006652		1		1
hsa-let-7g-3p	1		Moderate (predicted)					IL33	ENSG00000137033	1	1	1	1
hsa-let-7g-3p	1		Moderate (predicted)					INSM1	ENSG00000173404		1		1
hsa-let-7g-3p	1		Moderate (predicted)					IVNS1ABP	ENSG00000116679		1		1
hsa-let-7g-3p	1		Moderate (predicted)					JADE1	ENSG00000077684	1	1	1	1
hsa-let-7g-3p	1		Moderate (predicted)					JAK1	ENSG00000162434		1	1
hsa-let-7g-3p	1		Moderate (predicted)					KANSL1L	ENSG00000144445		1	1	1
hsa-let-7g-3p	1		Moderate (predicted)					KCNA3	ENSG00000177272				1
hsa-let-7g-3p	1		Moderate (predicted)					KCNAB1	ENSG00000169282		1	1	1
hsa-let-7g-3p	1		Moderate (predicted)					KCND2	ENSG00000184408		1	1	1
hsa-let-7g-3p	1		Moderate (predicted)					KCNK1	ENSG00000135750		1		1
hsa-let-7g-3p	1		Moderate (predicted)					KCTD15	ENSG00000153885	1	1	1	1
hsa-let-7g-3p	1		Moderate (predicted)					KDM2B	ENSG00000089094		1
hsa-let-7g-3p	1		Moderate (predicted)					KDM3A	ENSG00000115548		1
hsa-let-7g-3p	1		Moderate (predicted)					KEAP1	ENSG00000079999		1	1
hsa-let-7g-3p	1		Moderate (predicted)					KLF15	ENSG00000163884		1	1	1
hsa-let-7g-3p	1		Moderate (predicted)					KLF2	ENSG00000127528				1
hsa-let-7g-3p	1		Moderate (predicted)					KLF7	ENSG00000118263	1	1
hsa-let-7g-3p	1		Moderate (predicted)					KLHL1	ENSG00000150361		1		1
hsa-let-7g-3p	1		Moderate (predicted)					KLHL24	ENSG00000114796	1	1	1	1
hsa-let-7g-3p	1		Moderate (predicted)					LCOR	ENSG00000196233	1	1	1	1
hsa-let-7g-3p	1		Moderate (predicted)					LDB3	ENSG00000122367		1	1	1
hsa-let-7g-3p	1		Moderate (predicted)					LIN54	ENSG00000189308		1		1
hsa-let-7g-3p	1		Moderate (predicted)					LIN7B	ENSG00000104863		1
hsa-let-7g-3p	1		Moderate (predicted)					LINGO1	ENSG00000169783	1	1	1	1
hsa-let-7g-3p	1		Moderate (predicted)					LMO4	ENSG00000143013	1	1	1	1
hsa-let-7g-3p	1		Moderate (predicted)					LPGAT1	ENSG00000123684	1	1	1	1
hsa-let-7g-3p	1		Moderate (predicted)					LRP12	ENSG00000147650		1		1
hsa-let-7g-3p	1		Moderate (predicted)					LZTFL1	ENSG00000163818	1		1	1
hsa-let-7g-3p	1		Moderate (predicted)					MAG	ENSG00000105695	1		1
hsa-let-7g-3p	1		Moderate (predicted)					MANBA	ENSG00000109323				1
hsa-let-7g-3p	1		Moderate (predicted)					MANBAL	ENSG00000101363				1
hsa-let-7g-3p	1		Moderate (predicted)					MAP3K20	ENSG00000091436	1	1	1	1
hsa-let-7g-3p	1		Moderate (predicted)					MAP3K7CL	ENSG00000156265	1			1
hsa-let-7g-3p	1		Moderate (predicted)					MAP3K8	ENSG00000107968		1		1
hsa-let-7g-3p	1		Moderate (predicted)					MARS	ENSG00000166986		1
hsa-let-7g-3p	1		Moderate (predicted)					MBD5	ENSG00000204406		1		1
hsa-let-7g-3p	1		Moderate (predicted)					MBNL1	ENSG00000152601	1	1	1	1
hsa-let-7g-3p	1		Moderate (predicted)					MBNL2	ENSG00000139793		1		1
hsa-let-7g-3p	1		Moderate (predicted)					MECOM	ENSG00000085276	1	1		1
hsa-let-7g-3p	1		Moderate (predicted)					MEF2A	ENSG00000068305	1	1	1	1
hsa-let-7g-3p	1		Moderate (predicted)					MEF2C	ENSG00000081189		1		1
hsa-let-7g-3p	1		Moderate (predicted)					MEIOC	ENSG00000180336	1	1	1	1
hsa-let-7g-3p	1		Moderate (predicted)					METTL3	ENSG00000165819		1
hsa-let-7g-3p	1		Moderate (predicted)					MEX3C	ENSG00000176624		1	1	1
hsa-let-7g-3p	1		Moderate (predicted)					MIS12	ENSG00000167842		1	1	1
hsa-let-7g-3p	1		Moderate (predicted)					MLLT10	ENSG00000078403		1
hsa-let-7g-3p	1		Moderate (predicted)					MMRN2	ENSG00000173269				1
hsa-let-7g-3p	1		Moderate (predicted)					MMS19	ENSG00000155229		1
hsa-let-7g-3p	1		Moderate (predicted)					MORF4L1	ENSG00000185787	1	1		1
hsa-let-7g-3p	1		Moderate (predicted)					MRFAP1	ENSG00000179010		1		1
hsa-let-7g-3p	1		Moderate (predicted)					MSTO1	ENSG00000125459			1
hsa-let-7g-3p	1		Moderate (predicted)					MT1F	ENSG00000198417		1	1
hsa-let-7g-3p	1		Moderate (predicted)					MXD3	ENSG00000213347	1	1	1	1
hsa-let-7g-3p	1		Moderate (predicted)					MXRA5	ENSG00000101825		1	1	1
hsa-let-7g-3p	1		Moderate (predicted)					MYCBP2	ENSG00000005810	1	1	1
hsa-let-7g-3p	1		Moderate (predicted)					MZT1	ENSG00000204899		1		1
hsa-let-7g-3p	1		Moderate (predicted)					NAMPT	ENSG00000105835	1	1		1
hsa-let-7g-3p	1		Moderate (predicted)					NCOA3	ENSG00000124151	1	1	1	1
hsa-let-7g-3p	1		Moderate (predicted)					NCOA6	ENSG00000198646	1	1		1
hsa-let-7g-3p	1		Moderate (predicted)					NDST3	ENSG00000164100	1	1	1	1
hsa-let-7g-3p	1		Moderate (predicted)					NDUFB5	ENSG00000136521	1	1		1
hsa-let-7g-3p	1		Moderate (predicted)					NECAB1	ENSG00000123119	1			1
hsa-let-7g-3p	1		Moderate (predicted)					NEDD9	ENSG00000111859		1	1	1
hsa-let-7g-3p	1		Moderate (predicted)					NEK2	ENSG00000117650			1
hsa-let-7g-3p	1		Moderate (predicted)					NET1	ENSG00000173848		1		1
hsa-let-7g-3p	1		Moderate (predicted)					NETO2	ENSG00000171208				1
hsa-let-7g-3p	1		Moderate (predicted)					NEUROD6	ENSG00000164600	1		1
hsa-let-7g-3p	1		Moderate (predicted)					NHLRC2	ENSG00000196865	1	1		1
hsa-let-7g-3p	1		Moderate (predicted)					NKAIN2	ENSG00000188580				1
hsa-let-7g-3p	1		Moderate (predicted)					NR1D2	ENSG00000174738		1		1
hsa-let-7g-3p	1		Moderate (predicted)					NUDT10	ENSG00000122824	1	1	1	1
hsa-let-7g-3p	1		Moderate (predicted)					OTUD1	ENSG00000165312	1	1	1	1
hsa-let-7g-3p	1		Moderate (predicted)					PAICS	ENSG00000128050				1
hsa-let-7g-3p	1		Moderate (predicted)					PARP2	ENSG00000129484		1
hsa-let-7g-3p	1		Moderate (predicted)					PARVA	ENSG00000197702		1	1	1
hsa-let-7g-3p	1		Moderate (predicted)					PATE4	ENSG00000237353			1	1
hsa-let-7g-3p	1		Moderate (predicted)					PBX3	ENSG00000167081		1		1
hsa-let-7g-3p	1		Moderate (predicted)					PCBP4	ENSG00000090097		1		1
hsa-let-7g-3p	1		Moderate (predicted)					PCSK5	ENSG00000099139	1		1	1
hsa-let-7g-3p	1		Moderate (predicted)					PDCD6	ENSG00000249915		1		1
hsa-let-7g-3p	1		Moderate (predicted)					PDE9A	ENSG00000160191		1
hsa-let-7g-3p	1		Moderate (predicted)					PDIA5	ENSG00000065485		1
hsa-let-7g-3p	1		Moderate (predicted)					PDSS2	ENSG00000164494			1	1
hsa-let-7g-3p	1		Moderate (predicted)					PER3	ENSG00000049246	1		1	1
hsa-let-7g-3p	1		Moderate (predicted)					PGRMC2	ENSG00000164040	1	1	1	1
hsa-let-7g-3p	1		Moderate (predicted)					PHF6	ENSG00000156531		1		1
hsa-let-7g-3p	1		Moderate (predicted)					POLH	ENSG00000170734		1		1
hsa-let-7g-3p	1		Moderate (predicted)					POLR2J	ENSG00000005075		1
hsa-let-7g-3p	1		Moderate (predicted)					POLR3GL	ENSG00000121851		1	1
hsa-let-7g-3p	1		Moderate (predicted)					PPARGC1A	ENSG00000109819		1	1	1
hsa-let-7g-3p	1		Moderate (predicted)					PPP3R1	ENSG00000221823	1	1	1	1
hsa-let-7g-3p	1		Moderate (predicted)					PPP4R1	ENSG00000154845		1	1	1
hsa-let-7g-3p	1		Moderate (predicted)					PRKAB2	ENSG00000131791		1	1	1
hsa-let-7g-3p	1		Moderate (predicted)					PRPF38B	ENSG00000134186	1	1		1
hsa-let-7g-3p	1		Moderate (predicted)					PRRX1	ENSG00000116132	1	1	1	1
hsa-let-7g-3p	1		Moderate (predicted)					PSMA5	ENSG00000143106		1	1	1
hsa-let-7g-3p	1		Moderate (predicted)					PTPN4	ENSG00000088179		1
hsa-let-7g-3p	1		Moderate (predicted)					R3HDM1	ENSG00000048991		1
hsa-let-7g-3p	1		Moderate (predicted)					RAB14	ENSG00000119396		1	1	1
hsa-let-7g-3p	1		Moderate (predicted)					RABGAP1L	ENSG00000152061	1
hsa-let-7g-3p	1		Moderate (predicted)					RAD21	ENSG00000164754		1		1
hsa-let-7g-3p	1		Moderate (predicted)					RALYL	ENSG00000184672	1	1	1
hsa-let-7g-3p	1		Moderate (predicted)					RAP1B	ENSG00000127314	1	1		1
hsa-let-7g-3p	1		Moderate (predicted)					RAPGEF5	ENSG00000136237	1	1		1
hsa-let-7g-3p	1		Moderate (predicted)					RASL11B	ENSG00000128045		1		1
hsa-let-7g-3p	1		Moderate (predicted)					RASSF3	ENSG00000153179	1	1	1	1
hsa-let-7g-3p	1		Moderate (predicted)					RB1	ENSG00000139687	1	1	1	1
hsa-let-7g-3p	1		Moderate (predicted)					RBM33	ENSG00000184863		1	1	1
hsa-let-7g-3p	1		Moderate (predicted)					RBPMS	ENSG00000157110		1	1	1
hsa-let-7g-3p	1		Moderate (predicted)					RC3H2	ENSG00000056586			1
hsa-let-7g-3p	1		Moderate (predicted)					RCAN2	ENSG00000172348	1	1	1	1
hsa-let-7g-3p	1		Moderate (predicted)					REEP1	ENSG00000068615	1	1	1	1
hsa-let-7g-3p	1		Moderate (predicted)					REEP3	ENSG00000165476	1	1	1	1
hsa-let-7g-3p	1		Moderate (predicted)					RERGL	ENSG00000111404			1
hsa-let-7g-3p	1		Moderate (predicted)					RGS10	ENSG00000148908			1
hsa-let-7g-3p	1		Moderate (predicted)					RGS14	ENSG00000169220			1
hsa-let-7g-3p	1		Moderate (predicted)					RGS17	ENSG00000091844		1	1	1
hsa-let-7g-3p	1		Moderate (predicted)					RGS22	ENSG00000132554		1
hsa-let-7g-3p	1		Moderate (predicted)					RHOT1	ENSG00000126858		1		1
hsa-let-7g-3p	1		Moderate (predicted)					RNF152	ENSG00000176641			1
hsa-let-7g-3p	1		Moderate (predicted)					RNF19A	ENSG00000034677			1
hsa-let-7g-3p	1		Moderate (predicted)					RPL29	ENSG00000162244		1
hsa-let-7g-3p	1		Moderate (predicted)					RXRG	ENSG00000143171		1
hsa-let-7g-3p	1		Moderate (predicted)					SCYL1	ENSG00000142186		1
hsa-let-7g-3p	1		Moderate (predicted)					SERPINE2	ENSG00000135919		1
hsa-let-7g-3p	1		Moderate (predicted)					SETDB2	ENSG00000136169	1	1	1	1
hsa-let-7g-3p	1		Moderate (predicted)					SH2B3	ENSG00000111252	1	1	1	1
hsa-let-7g-3p	1		Moderate (predicted)					SH3D19	ENSG00000109686	1	1	1	1
hsa-let-7g-3p	1		Moderate (predicted)					SHISA5	ENSG00000164054		1		1
hsa-let-7g-3p	1		Moderate (predicted)					SHOC2	ENSG00000108061	1	1	1	1
hsa-let-7g-3p	1		Moderate (predicted)					SLC20A1	ENSG00000144136		1
hsa-let-7g-3p	1		Moderate (predicted)					SLC20A2	ENSG00000168575	1	1	1	1
hsa-let-7g-3p	1		Moderate (predicted)					SLC22A10	ENSG00000184999				1
hsa-let-7g-3p	1		Moderate (predicted)					SLC24A2	ENSG00000155886	1	1		1
hsa-let-7g-3p	1		Moderate (predicted)					SLC25A4	ENSG00000151729		1		1
hsa-let-7g-3p	1		Moderate (predicted)					SLC30A5	ENSG00000145740		1		1
hsa-let-7g-3p	1		Moderate (predicted)					SLC35F3	ENSG00000183780		1	1	1
hsa-let-7g-3p	1		Moderate (predicted)					SLC6A1	ENSG00000157103				1
hsa-let-7g-3p	1		Moderate (predicted)					SLITRK6	ENSG00000184564		1		1
hsa-let-7g-3p	1		Moderate (predicted)					SMARCA5	ENSG00000153147	1	1		1
hsa-let-7g-3p	1		Moderate (predicted)					SNRPB2	ENSG00000125870		1		1
hsa-let-7g-3p	1		Moderate (predicted)					SNX24	ENSG00000064652		1		1
hsa-let-7g-3p	1		Moderate (predicted)					SOCS5	ENSG00000171150	1	1	1	1
hsa-let-7g-3p	1		Moderate (predicted)					SOGA1	ENSG00000149639		1	1	1
hsa-let-7g-3p	1		Moderate (predicted)					SOWAHA	ENSG00000198944	1	1	1	1
hsa-let-7g-3p	1		Moderate (predicted)					SOX11	ENSG00000176887		1		1
hsa-let-7g-3p	1		Moderate (predicted)					SPINT2	ENSG00000167642		1
hsa-let-7g-3p	1		Moderate (predicted)					SPOCK1	ENSG00000152377	1	1	1	1
hsa-let-7g-3p	1		Moderate (predicted)					SPRED1	ENSG00000166068		1	1	1
hsa-let-7g-3p	1		Moderate (predicted)					SPRTN	ENSG00000010072			1	1
hsa-let-7g-3p	1		Moderate (predicted)					SRI	ENSG00000075142		1	1	1
hsa-let-7g-3p	1		Moderate (predicted)					SSH2	ENSG00000141298		1		1
hsa-let-7g-3p	1		Moderate (predicted)					ST7	ENSG00000004866	1	1	1
hsa-let-7g-3p	1		Moderate (predicted)					STARD4	ENSG00000164211		1	1	1
hsa-let-7g-3p	1		Moderate (predicted)					STPG1	ENSG00000001460			1	1
hsa-let-7g-3p	1		Moderate (predicted)					SUSD6	ENSG00000100647		1		1
hsa-let-7g-3p	1		Moderate (predicted)					TAB2	ENSG00000055208		1	1	1
hsa-let-7g-3p	1		Moderate (predicted)					TAL1	ENSG00000162367	1	1	1	1
hsa-let-7g-3p	1		Moderate (predicted)					TCERG1L	ENSG00000176769		1
hsa-let-7g-3p	1		Moderate (predicted)					TCTEX1D1	ENSG00000152760	1	1		1
hsa-let-7g-3p	1		Moderate (predicted)					TM2D2	ENSG00000169490		1	1	1
hsa-let-7g-3p	1		Moderate (predicted)					TMED2	ENSG00000086598				1
hsa-let-7g-3p	1		Moderate (predicted)					TMEM100	ENSG00000166292	1	1		1
hsa-let-7g-3p	1		Moderate (predicted)					TMEM165	ENSG00000134851		1		1
hsa-let-7g-3p	1		Moderate (predicted)					TMEM17	ENSG00000186889				1
hsa-let-7g-3p	1		Moderate (predicted)					TMEM18	ENSG00000151353				1
hsa-let-7g-3p	1		Moderate (predicted)					TMSB4X	ENSG00000205542	1	1
hsa-let-7g-3p	1		Moderate (predicted)					TMSB4Y	ENSG00000154620	1	1		1
hsa-let-7g-3p	1		Moderate (predicted)					TOB2	ENSG00000183864	1	1	1	1
hsa-let-7g-3p	1		Moderate (predicted)					TOMM20	ENSG00000173726	1	1	1	1
hsa-let-7g-3p	1		Moderate (predicted)					TOP1MT	ENSG00000184428		1
hsa-let-7g-3p	1		Moderate (predicted)					TPM3	ENSG00000143549		1	1	1
hsa-let-7g-3p	1		Moderate (predicted)					TRA2B	ENSG00000136527		1		1
hsa-let-7g-3p	1		Moderate (predicted)					TRAPPC13	ENSG00000113597		1		1
hsa-let-7g-3p	1		Moderate (predicted)					TRIM59	ENSG00000213186		1		1
hsa-let-7g-3p	1		Moderate (predicted)					TSC22D1	ENSG00000102804	1		1
hsa-let-7g-3p	1		Moderate (predicted)					TSEN2	ENSG00000154743		1	1	1
hsa-let-7g-3p	1		Moderate (predicted)					TTC30B	ENSG00000196659			1
hsa-let-7g-3p	1		Moderate (predicted)					TTL	ENSG00000114999		1	1	1
hsa-let-7g-3p	1		Moderate (predicted)					TUSC1	ENSG00000198680			1	1
hsa-let-7g-3p	1		Moderate (predicted)					USP14	ENSG00000101557	1	1	1	1
hsa-let-7g-3p	1		Moderate (predicted)					USP33	ENSG00000077254	1	1	1	1
hsa-let-7g-3p	1		Moderate (predicted)					VAV3	ENSG00000134215	1	1	1	1
hsa-let-7g-3p	1		Moderate (predicted)					VEZF1	ENSG00000136451	1	1		1
hsa-let-7g-3p	1		Moderate (predicted)					VRK1	ENSG00000100749		1
hsa-let-7g-3p	1		Moderate (predicted)					WIPI2	ENSG00000157954		1	1	1
hsa-let-7g-3p	1		Moderate (predicted)					XAF1	ENSG00000132530			1	1
hsa-let-7g-3p	1		Moderate (predicted)					XKR4	ENSG00000206579		1	1	1
hsa-let-7g-3p	1		Moderate (predicted)					YLPM1	ENSG00000119596				1
hsa-let-7g-3p	1		Moderate (predicted)					ZC3H12B	ENSG00000102053			1
hsa-let-7g-3p	1		Moderate (predicted)					ZC3HAV1L	ENSG00000146858		1	1	1
hsa-let-7g-3p	1		Moderate (predicted)					ZC4H2	ENSG00000126970		1	1	1
hsa-let-7g-3p	1		Moderate (predicted)					ZDHHC21	ENSG00000175893		1	1	1
hsa-let-7g-3p	1		Moderate (predicted)					ZFP3	ENSG00000180787	1	1	1	1
hsa-let-7g-3p	1		Moderate (predicted)					ZFY	ENSG00000067646		1	1	1
hsa-let-7g-3p	1		Moderate (predicted)					ZMYM5	ENSG00000132950		1		1
hsa-let-7g-3p	1		Moderate (predicted)					ZMYND8	ENSG00000101040		1		1
hsa-let-7g-3p	1		Moderate (predicted)					ZNF10	ENSG00000256223		1		1
hsa-let-7g-3p	1		Moderate (predicted)					ZNF195	ENSG00000005801			1	1
hsa-let-7g-3p	1		Moderate (predicted)					ZNF275	ENSG00000063587	1	1	1	1
hsa-let-7g-3p	1		Moderate (predicted)					ZNF341	ENSG00000131061				1
hsa-let-7g-3p	1		Moderate (predicted)					ZNF431	ENSG00000196705			1	1
hsa-let-7g-3p	1		Moderate (predicted)					ZNF491	ENSG00000177599			1	1
hsa-let-7g-3p	1		Moderate (predicted)					ZNF574	ENSG00000105732		1
hsa-let-7g-3p	1		Moderate (predicted)					ZNF627	ENSG00000198551	1		1	1
hsa-let-7g-3p	1		Moderate (predicted)					ZNF701	ENSG00000167562	1	1	1	1
hsa-let-7g-3p	1		Moderate (predicted)					ZNF83	ENSG00000167766	1	1		1
hsa-miR-107	1	1	Experimentally Observed,High (predicted)	1	1	8	1	NFIA	ENSG00000162599	1	1
hsa-miR-107		1	Experimentally Observed	1	1	8	1	BACE1	ENSG00000186318	1	1	1	1
hsa-miR-107	1		Experimentally Observed,High (predicted)	1	1	66	1	ACTR2	ENSG00000138071		1	1	1
hsa-miR-107	1		Experimentally Observed,High (predicted)	1	1	29	1	AGFG1	ENSG00000173744		1		1
hsa-miR-107	1		Experimentally Observed,High (predicted)	1	1	55	1	AGO1	ENSG00000092847	1	1	1
hsa-miR-107	1		Experimentally Observed,High (predicted)	1	1	19	1	APLN	ENSG00000171388				1
hsa-miR-107	1		Experimentally Observed,High (predicted)	1	1	43	1	AREL1	ENSG00000119682		1	1	1
hsa-miR-107	1		Experimentally Observed,High (predicted)	1	1	12	1	ARHGAP17	ENSG00000140750
hsa-miR-107	1		Experimentally Observed,High (predicted)	1	1	15	1	ARL4C	ENSG00000188042		1	1	1
hsa-miR-107	1		Experimentally Observed,High (predicted)	1	1	14	1	ARMC1	ENSG00000104442	1	1	1	1
hsa-miR-107	1		Experimentally Observed,High (predicted)	1	1	12	1	ARMC8	ENSG00000114098	1	1	1	1
hsa-miR-107	1		Experimentally Observed,High (predicted)	1	1	26	1	AXIN2	ENSG00000168646		1		1
hsa-miR-107	1		Experimentally Observed,High (predicted)	1	1	29	1	BCAT2	ENSG00000105552	1
hsa-miR-107	1		Experimentally Observed,High (predicted)	1	1	40	1	BHLHE40	ENSG00000134107	1		1	1
hsa-miR-107	1		Experimentally Observed,High (predicted)	1	1	1	1	C17orf80	ENSG00000141219		1		1
hsa-miR-107	1		Experimentally Observed,High (predicted)	1	1	25	1	C2CD5	ENSG00000111731		1
hsa-miR-107	1		Experimentally Observed,High (predicted)	1	1	12	1	CACNA2D1	ENSG00000153956
hsa-miR-107	1		Experimentally Observed,High (predicted)	1	1	26	1	CCDC50	ENSG00000152492			1	1
hsa-miR-107	1		Experimentally Observed,High (predicted)	1	1	4	1	CD80	ENSG00000121594
hsa-miR-107	1		Experimentally Observed,High (predicted)	1	1	7	1	CDC14A	ENSG00000079335	1	1	1	1
hsa-miR-107	1		Experimentally Observed,High (predicted)	1	1	21	1	CDK5R1	ENSG00000176749	1	1	1	1
hsa-miR-107	1		Experimentally Observed,High (predicted)	1	1	20	1	CHD1	ENSG00000153922	1	1	1
hsa-miR-107	1		Experimentally Observed,High (predicted)	1	1	32	1	CPEB3	ENSG00000107864	1	1		1
hsa-miR-107	1		Experimentally Observed,High (predicted)	1	1	28	1	CUL4A	ENSG00000139842
hsa-miR-107	1		Experimentally Observed,High (predicted)	1	1	30	1	DCP1A	ENSG00000272886
hsa-miR-107	1		Experimentally Observed,High (predicted)	1	1	31	1	DESI1	ENSG00000100418	1	1	1	1
hsa-miR-107	1		Experimentally Observed,High (predicted)	1	1	50	1	DNAJB4	ENSG00000162616
hsa-miR-107	1		Experimentally Observed,High (predicted)	1	1	34	1	DUS1L	ENSG00000169718		1		1
hsa-miR-107	1		Experimentally Observed,High (predicted)	1	1	34	1	EIF5	ENSG00000100664		1		1
hsa-miR-107	1		Experimentally Observed,High (predicted)	1	1	12	1	ERLIN1	ENSG00000107566	1	1	1	1
hsa-miR-107	1		Experimentally Observed,High (predicted)	1	1	32	1	FAM103A1	ENSG00000169612
hsa-miR-107	1		Experimentally Observed,High (predicted)	1	1	51	1	FGFRL1	ENSG00000127418			1	1
hsa-miR-107	1		Experimentally Observed,High (predicted)	1	1	22	1	FRYL	ENSG00000075539	1	1	1	1
hsa-miR-107	1		Experimentally Observed,High (predicted)	1	1	5	1	FUCA2	ENSG00000001036				1
hsa-miR-107	1		Experimentally Observed,High (predicted)	1	1	32	1	GALNT7	ENSG00000109586	1	1	1	1
hsa-miR-107	1		Experimentally Observed,High (predicted)	1	1	44	1	GCC2	ENSG00000135968	1	1	1	1
hsa-miR-107	1		Experimentally Observed,High (predicted)	1	1	35	1	GPCPD1	ENSG00000125772		1		1
hsa-miR-107	1		Experimentally Observed,High (predicted)	1	1	5	1	GPRIN3	ENSG00000185477		1	1	1
hsa-miR-107	1		Experimentally Observed,High (predicted)	1			1	GRIN2A	ENSG00000183454
hsa-miR-107	1		Experimentally Observed,High (predicted)	1	1	14	1	HELZ	ENSG00000198265		1		1
hsa-miR-107	1		Experimentally Observed,High (predicted)	1	1	52	1	HMGA1	ENSG00000137309		1
hsa-miR-107	1		Experimentally Observed,High (predicted)	1	1	9	1	HSDL1	ENSG00000103160		1	1	1
hsa-miR-107	1		Experimentally Observed,High (predicted)	1	1	21	1	IQGAP1	ENSG00000140575		1		1
hsa-miR-107	1		Experimentally Observed,High (predicted)	1	1	16	1	JAKMIP2	ENSG00000176049		1
hsa-miR-107	1		Experimentally Observed,High (predicted)	1	1	41	1	LAPTM4A	ENSG00000068697		1
hsa-miR-107	1		Experimentally Observed,High (predicted)	1	1	23	1	LDOC1	ENSG00000182195			1	1
hsa-miR-107	1		Experimentally Observed,High (predicted)	1	1	3	1	LRRC61	ENSG00000127399		1
hsa-miR-107	1		Experimentally Observed,High (predicted)	1	1	42	1	MCFD2	ENSG00000180398	1	1		1
hsa-miR-107	1		Experimentally Observed,High (predicted)	1	1	30	1	MCM7	ENSG00000166508
hsa-miR-107	1		Experimentally Observed,High (predicted)	1	1	35	1	MYBL1	ENSG00000185697		1		1
hsa-miR-107	1		Experimentally Observed,High (predicted)	1	1	54	1	N4BP1	ENSG00000102921	1	1		1
hsa-miR-107	1		Experimentally Observed,High (predicted)	1	1	24	1	NAA15	ENSG00000164134	1	1	1	1
hsa-miR-107	1		Experimentally Observed,High (predicted)	1	1	25	1	NAA60	ENSG00000122390
hsa-miR-107	1		Experimentally Observed,High (predicted)	1	1	34	1	NDEL1	ENSG00000166579	1	1	1
hsa-miR-107	1		Experimentally Observed,High (predicted)	1			1	NOVA1	ENSG00000139910	1	1	1	1
hsa-miR-107	1		Experimentally Observed,High (predicted)	1	1	24	1	NRIP1	ENSG00000180530	1	1	1	1
hsa-miR-107	1		Experimentally Observed,High (predicted)	1	1	5	1	NUDCD2	ENSG00000170584
hsa-miR-107	1		Experimentally Observed,High (predicted)	1	1	15	1	OS9	ENSG00000135506
hsa-miR-107	1		Experimentally Observed,High (predicted)	1	1	26	1	OTUD4	ENSG00000164164		1	1	1
hsa-miR-107	1		Experimentally Observed,High (predicted)	1	1	23	1	PAWR	ENSG00000177425
hsa-miR-107	1		Experimentally Observed,High (predicted)	1	1	10	1	PDCD10	ENSG00000114209		1
hsa-miR-107	1		Experimentally Observed,High (predicted)	1	1	32	1	PDZD8	ENSG00000165650
hsa-miR-107	1		Experimentally Observed,High (predicted)	1	1	13	1	PGRMC2	ENSG00000164040	1	1	1	1
hsa-miR-107	1		Experimentally Observed,High (predicted)	1	1	28	1	PHF19	ENSG00000119403		1	1	1
hsa-miR-107	1		Experimentally Observed,High (predicted)	1	1	19	1	PHF20	ENSG00000025293		1		1
hsa-miR-107	1		Experimentally Observed,High (predicted)	1	1	42	1	PLEKHA1	ENSG00000107679		1	1	1
hsa-miR-107	1		Experimentally Observed,High (predicted)	1	1	27	1	PLSCR4	ENSG00000114698		1	1	1
hsa-miR-107	1		Experimentally Observed,High (predicted)	1	1	6	1	PNPLA2	ENSG00000177666			1
hsa-miR-107	1		Experimentally Observed,High (predicted)	1	1	22	1	POLDIP2	ENSG00000004142		1		1
hsa-miR-107	1		Experimentally Observed,High (predicted)	1	1	79	1	PPP6C	ENSG00000119414	1	1	1	1
hsa-miR-107	1		Experimentally Observed,High (predicted)	1	1	15	1	PPP6R2	ENSG00000100239	1	1		1
hsa-miR-107	1		Experimentally Observed,High (predicted)	1	1	21	1	PRKCE	ENSG00000171132		1	1	1
hsa-miR-107	1		Experimentally Observed,High (predicted)	1	1	16	1	PRPS2	ENSG00000101911	1	1	1	1
hsa-miR-107	1		Experimentally Observed,High (predicted)	1	1	26	1	PTEN	ENSG00000171862		1		1
hsa-miR-107	1		Experimentally Observed,High (predicted)	1	1	55	1	RAB10	ENSG00000084733	1	1	1	1
hsa-miR-107	1		Experimentally Observed,High (predicted)	1	1	38	1	RASSF8	ENSG00000123094		1	1	1
hsa-miR-107	1		Experimentally Observed,High (predicted)	1	1	7	1	RCAN1	ENSG00000159200	1	1	1	1
hsa-miR-107	1		Experimentally Observed,High (predicted)	1	1	17	1	RDH11	ENSG00000072042		1		1
hsa-miR-107	1		Experimentally Observed,High (predicted)	1	1	139	1	RNF38	ENSG00000137075	1	1	1	1
hsa-miR-107	1		Experimentally Observed,High (predicted)	1	1	14	1	RRAGC	ENSG00000116954
hsa-miR-107	1		Experimentally Observed,High (predicted)	1	1	12	1	SCN8A	ENSG00000196876		1		1
hsa-miR-107	1		Experimentally Observed,High (predicted)	1	1	40	1	SDCBP	ENSG00000137575		1		1
hsa-miR-107	1		Experimentally Observed,High (predicted)	1	1	31	1	SH3BP4	ENSG00000130147	1	1	1	1
hsa-miR-107	1		Experimentally Observed,High (predicted)	1	1	12	1	SH3BP5	ENSG00000131370				1
hsa-miR-107	1		Experimentally Observed,High (predicted)	1	1	28	1	SMPD1	ENSG00000166311		1
hsa-miR-107	1		Experimentally Observed,High (predicted)	1	1	5	1	SNCG	ENSG00000173267
hsa-miR-107	1		Experimentally Observed,High (predicted)	1	1	23	1	SNRK	ENSG00000163788	1	1	1	1
hsa-miR-107	1		Experimentally Observed,High (predicted)	1	1	30	1	SNX12	ENSG00000147164
hsa-miR-107	1		Experimentally Observed,High (predicted)	1	1	6	1	SRSF3	ENSG00000112081	1			1
hsa-miR-107	1		Experimentally Observed,High (predicted)	1	1	14	1	SUN2	ENSG00000100242		1		1
hsa-miR-107	1		Experimentally Observed,High (predicted)	1	1	22	1	TARBP2	ENSG00000139546		1
hsa-miR-107	1		Experimentally Observed,High (predicted)	1	1	3	1	TBKBP1	ENSG00000198933
hsa-miR-107	1		Experimentally Observed,High (predicted)	1	1	23	1	TFRC	ENSG00000072274		1		1
hsa-miR-107	1		Experimentally Observed,High (predicted)	1	1	10	1	TGFBR2	ENSG00000163513	1	1	1	1
hsa-miR-107	1		Experimentally Observed,High (predicted)	1	1	25	1	TPD52	ENSG00000076554		1	1	1
hsa-miR-107	1		Experimentally Observed,High (predicted)	1	1	37	1	TRIAP1	ENSG00000170855
hsa-miR-107	1		Experimentally Observed,High (predicted)	1			1	UNC80	ENSG00000144406	1	1	1	1
hsa-miR-107	1		Experimentally Observed,High (predicted)	1	1	21	1	UPF2	ENSG00000151461				1
hsa-miR-107	1		Experimentally Observed,High (predicted)	1	1	21	1	VCAN	ENSG00000038427
hsa-miR-107	1		Experimentally Observed,High (predicted)	1	1	6	1	VDAC2	ENSG00000165637			1
hsa-miR-107	1		Experimentally Observed,High (predicted)	1	1	33	1	VPS4A	ENSG00000132612
hsa-miR-107	1		Experimentally Observed,High (predicted)	1	1	33	1	YWHAH	ENSG00000128245		1	1
hsa-miR-107	1		Experimentally Observed,High (predicted)	1	1	41	1	ZBTB10	ENSG00000205189		1		1
hsa-miR-107	1		Experimentally Observed,High (predicted)	1	1	111	1	ZBTB34	ENSG00000177125	1	1	1	1
hsa-miR-107	1		Experimentally Observed,High (predicted)	1	1	5	1	ZFPM2	ENSG00000169946	1	1
hsa-miR-107	1		Experimentally Observed,High (predicted)	1	1	67	1	ZHX1	ENSG00000165156		1	1	1
hsa-miR-107	1		Experimentally Observed,High (predicted)	1	1	32	1	ZNRF2	ENSG00000180233	1	1
hsa-miR-107	1		Experimentally Observed,High (predicted)	1	1	45	1	ZYX	ENSG00000159840		1
hsa-miR-107	1		Experimentally Observed,Moderate (predicted)	1	1	20	1	AARS	ENSG00000090861	1	1
hsa-miR-107	1		Experimentally Observed,Moderate (predicted)	1	1	32	1	ABCF2	ENSG00000033050		1	1	1
hsa-miR-107	1		Experimentally Observed,Moderate (predicted)	1	1	66	1	ABL2	ENSG00000143322		1	1	1
hsa-miR-107	1		Experimentally Observed,Moderate (predicted)	1	1	15	1	ACOX1	ENSG00000161533	1	1	1	1
hsa-miR-107	1		Experimentally Observed,Moderate (predicted)	1	1	75	1	ACTG1	ENSG00000184009		1
hsa-miR-107	1		Experimentally Observed,Moderate (predicted)	1	1	56	1	ACVR2B	ENSG00000114739		1		1
hsa-miR-107	1		Experimentally Observed,Moderate (predicted)	1	1	9	1	ADAM10	ENSG00000137845	1	1	1	1
hsa-miR-107	1		Experimentally Observed,Moderate (predicted)	1	1	39	1	ADD1	ENSG00000087274			1	1
hsa-miR-107	1		Experimentally Observed,Moderate (predicted)	1	1	37	1	AFF4	ENSG00000072364	1	1	1	1
hsa-miR-107	1		Experimentally Observed,Moderate (predicted)	1	1	6	1	AGO2	ENSG00000123908	1	1	1	1
hsa-miR-107	1		Experimentally Observed,Moderate (predicted)	1	1	9	1	AMOT	ENSG00000126016	1	1	1	1
hsa-miR-107	1		Experimentally Observed,Moderate (predicted)	1			1	ANKRD44	ENSG00000065413	1	1	1	1
hsa-miR-107	1		Experimentally Observed,Moderate (predicted)	1	1	3	1	ANKS6	ENSG00000165138		1		1
hsa-miR-107	1		Experimentally Observed,Moderate (predicted)	1	1	23	1	ARF6	ENSG00000165527		1		1
hsa-miR-107	1		Experimentally Observed,Moderate (predicted)	1	1	25	1	ARHGAP32	ENSG00000134909		1	1	1
hsa-miR-107	1		Experimentally Observed,Moderate (predicted)	1	1	60	1	ARIH1	ENSG00000166233	1	1	1	1
hsa-miR-107	1		Experimentally Observed,Moderate (predicted)	1	1	27	1	ARL8A	ENSG00000143862		1		1
hsa-miR-107	1		Experimentally Observed,Moderate (predicted)	1	1	41	1	ASH1L	ENSG00000116539	1	1	1	1
hsa-miR-107	1		Experimentally Observed,Moderate (predicted)	1	1	10	1	ATF6	ENSG00000118217
hsa-miR-107	1		Experimentally Observed,Moderate (predicted)	1	1	93	1	ATG9A	ENSG00000198925		1		1
hsa-miR-107	1		Experimentally Observed,Moderate (predicted)	1	1	118	1	ATP13A3	ENSG00000133657	1	1	1	1
hsa-miR-107	1		Experimentally Observed,Moderate (predicted)	1	1	33	1	ATXN1L	ENSG00000224470
hsa-miR-107	1		Experimentally Observed,Moderate (predicted)	1	1	10	1	AUH	ENSG00000148090
hsa-miR-107	1		Experimentally Observed,Moderate (predicted)	1	1	38	1	AVL9	ENSG00000105778		1
hsa-miR-107	1		Experimentally Observed,Moderate (predicted)	1	1	31	1	B3GNT2	ENSG00000170340			1	1
hsa-miR-107	1		Experimentally Observed,Moderate (predicted)	1	1	5	1	BCAM	ENSG00000187244			1	1
hsa-miR-107	1		Experimentally Observed,Moderate (predicted)	1	1	4	1	BCL2L13	ENSG00000099968			1	1
hsa-miR-107	1		Experimentally Observed,Moderate (predicted)	1	1	46	1	BCL2L2	ENSG00000129473	1	1	1	1
hsa-miR-107	1		Experimentally Observed,Moderate (predicted)	1	1	1	1	BECN1	ENSG00000126581		1
hsa-miR-107	1		Experimentally Observed,Moderate (predicted)	1	1	4	1	BNIP3	ENSG00000176171	1
hsa-miR-107	1		Experimentally Observed,Moderate (predicted)	1	1	13	1	BOLA3	ENSG00000163170
hsa-miR-107	1		Experimentally Observed,Moderate (predicted)	1	1	84	1	BTG2	ENSG00000159388		1	1	1
hsa-miR-107	1		Experimentally Observed,Moderate (predicted)	1	1	11	1	C15orf40	ENSG00000169609
hsa-miR-107	1		Experimentally Observed,Moderate (predicted)	1	1	32	1	C16orf72	ENSG00000182831	1	1	1	1
hsa-miR-107	1		Experimentally Observed,Moderate (predicted)	1	1	12	1	C17orf51	ENSG00000212719
hsa-miR-107	1		Experimentally Observed,Moderate (predicted)	1	1	15	1	C1orf226	ENSG00000239887		1
hsa-miR-107	1		Experimentally Observed,Moderate (predicted)	1			1	C1QL3	ENSG00000165985		1
hsa-miR-107	1		Experimentally Observed,Moderate (predicted)	1	1	21	1	C20orf27	ENSG00000101220
hsa-miR-107	1		Experimentally Observed,Moderate (predicted)	1	1	14	1	CAB39	ENSG00000135932		1		1
hsa-miR-107	1		Experimentally Observed,Moderate (predicted)	1	1	26	1	CAPZA2	ENSG00000198898		1
hsa-miR-107	1		Experimentally Observed,Moderate (predicted)	1	1	41	1	CARM1	ENSG00000142453		1		1
hsa-miR-107	1		Experimentally Observed,Moderate (predicted)	1	1	35	1	CASK	ENSG00000147044		1
hsa-miR-107	1		Experimentally Observed,Moderate (predicted)	1	1	24	1	CC2D1B	ENSG00000154222	1	1	1	1
hsa-miR-107	1		Experimentally Observed,Moderate (predicted)	1	1	15	1	CCDC85C	ENSG00000205476		1		1
hsa-miR-107	1		Experimentally Observed,Moderate (predicted)	1	1	68	1	CCNE1	ENSG00000105173		1
hsa-miR-107	1		Experimentally Observed,Moderate (predicted)	1	1	28	1	CCNT1	ENSG00000129315
hsa-miR-107	1		Experimentally Observed,Moderate (predicted)	1	1	6	1	CDADC1	ENSG00000102543	1		1	1
hsa-miR-107	1		Experimentally Observed,Moderate (predicted)	1	1	51	1	CDC25A	ENSG00000164045	1	1	1	1
hsa-miR-107	1		Experimentally Observed,Moderate (predicted)	1	1	6	1	CDC42SE1	ENSG00000197622		1	1	1
hsa-miR-107	1		Experimentally Observed,Moderate (predicted)	1	1	70	1	CDK6	ENSG00000105810		1		1
hsa-miR-107	1		Experimentally Observed,Moderate (predicted)	1	1	13	1	CDK8	ENSG00000132964		1
hsa-miR-107	1		Experimentally Observed,Moderate (predicted)	1	1	41	1	CFL1	ENSG00000172757			1
hsa-miR-107	1		Experimentally Observed,Moderate (predicted)	1	1	27	1	CHD2	ENSG00000173575		1		1
hsa-miR-107	1		Experimentally Observed,Moderate (predicted)	1	1	20	1	CHIC1	ENSG00000204116	1	1	1	1
hsa-miR-107	1		Experimentally Observed,Moderate (predicted)	1			1	CHRNA10	ENSG00000129749	1		1
hsa-miR-107	1		Experimentally Observed,Moderate (predicted)	1	1	2	1	CINP	ENSG00000100865
hsa-miR-107	1		Experimentally Observed,Moderate (predicted)	1	1	19	1	CLCN3	ENSG00000109572	1	1		1
hsa-miR-107	1		Experimentally Observed,Moderate (predicted)	1	1	34	1	CLOCK	ENSG00000134852		1		1
hsa-miR-107	1		Experimentally Observed,Moderate (predicted)	1	1	5	1	CNNM3	ENSG00000168763		1	1	1
hsa-miR-107	1		Experimentally Observed,Moderate (predicted)	1	1	27	1	CSNK1G2	ENSG00000133275		1
hsa-miR-107	1		Experimentally Observed,Moderate (predicted)	1	1	27	1	CTDSP1	ENSG00000144579		1	1	1
hsa-miR-107	1		Experimentally Observed,Moderate (predicted)	1	1	12	1	CTNNA1	ENSG00000044115		1	1	1
hsa-miR-107	1		Experimentally Observed,Moderate (predicted)	1	1	15	1	CTSD	ENSG00000117984
hsa-miR-107	1		Experimentally Observed,Moderate (predicted)	1	1	2	1	CYB5D1	ENSG00000182224
hsa-miR-107	1		Experimentally Observed,Moderate (predicted)	1	1	11	1	DBNDD2	ENSG00000244274
hsa-miR-107	1		Experimentally Observed,Moderate (predicted)	1	1	31	1	DCTN5	ENSG00000166847		1		1
hsa-miR-107	1		Experimentally Observed,Moderate (predicted)	1	1	66	1	DHX33	ENSG00000005100	1	1	1	1
hsa-miR-107	1		Experimentally Observed,Moderate (predicted)	1	1	11	1	DKK1	ENSG00000107984	1	1	1	1
hsa-miR-107	1		Experimentally Observed,Moderate (predicted)	1	1	11	1	DLG5	ENSG00000151208		1		1
hsa-miR-107	1		Experimentally Observed,Moderate (predicted)	1			1	DLL1	ENSG00000275555
hsa-miR-107	1		Experimentally Observed,Moderate (predicted)	1			1	DMBT1	ENSG00000187908
hsa-miR-107	1		Experimentally Observed,Moderate (predicted)	1	1	25	1	DNAJA1	ENSG00000086061
hsa-miR-107	1		Experimentally Observed,Moderate (predicted)	1	1	3	1	DSC3	ENSG00000134762
hsa-miR-107	1		Experimentally Observed,Moderate (predicted)	1			1	DUSP14	ENSG00000275932
hsa-miR-107	1		Experimentally Observed,Moderate (predicted)	1	1	18	1	DYNLL2	ENSG00000264364		1		1
hsa-miR-107	1		Experimentally Observed,Moderate (predicted)	1	1	6	1	EDIL3	ENSG00000164176	1	1	1
hsa-miR-107	1		Experimentally Observed,Moderate (predicted)	1	1	53	1	ELK4	ENSG00000158711		1	1	1
hsa-miR-107	1		Experimentally Observed,Moderate (predicted)	1	1	8	1	EPHA7	ENSG00000135333		1		1
hsa-miR-107	1		Experimentally Observed,Moderate (predicted)	1	1	10	1	FAM110C	ENSG00000184731	1	1	1	1
hsa-miR-107	1		Experimentally Observed,Moderate (predicted)	1	1	9	1	FAM117B	ENSG00000138439	1	1	1	1
hsa-miR-107	1		Experimentally Observed,Moderate (predicted)	1			1	FAM189B	ENSG00000262666
hsa-miR-107	1		Experimentally Observed,Moderate (predicted)	1	1	3	1	FAM217B	ENSG00000196227	1		1	1
hsa-miR-107	1		Experimentally Observed,Moderate (predicted)	1	1	37	1	FAM98A	ENSG00000119812		1
hsa-miR-107	1		Experimentally Observed,Moderate (predicted)	1	1	38	1	FASN	ENSG00000169710		1
hsa-miR-107	1		Experimentally Observed,Moderate (predicted)	1	1	2	1	FBXL20	ENSG00000108306		1
hsa-miR-107	1		Experimentally Observed,Moderate (predicted)	1	1	12	1	FBXO10	ENSG00000147912		1		1
hsa-miR-107	1		Experimentally Observed,Moderate (predicted)	1	1	32	1	FBXO21	ENSG00000135108	1	1	1	1
hsa-miR-107	1		Experimentally Observed,Moderate (predicted)	1	1	48	1	FBXW7	ENSG00000109670	1	1	1	1
hsa-miR-107	1		Experimentally Observed,Moderate (predicted)	1	1	17	1	FCF1	ENSG00000119616			1	1
hsa-miR-107	1		Experimentally Observed,Moderate (predicted)	1			1	FCHO1	ENSG00000130475
hsa-miR-107	1		Experimentally Observed,Moderate (predicted)	1	1	4	1	FDXR	ENSG00000161513
hsa-miR-107	1		Experimentally Observed,Moderate (predicted)	1	1	22	1	FERMT2	ENSG00000073712		1
hsa-miR-107	1		Experimentally Observed,Moderate (predicted)	1	1	36	1	FKBP1A	ENSG00000088832		1		1
hsa-miR-107	1		Experimentally Observed,Moderate (predicted)	1	1	37	1	FLOT2	ENSG00000132589		1		1
hsa-miR-107	1		Experimentally Observed,Moderate (predicted)	1	1	2	1	FNDC4	ENSG00000115226	1		1
hsa-miR-107	1		Experimentally Observed,Moderate (predicted)	1	1	21	1	FOXJ3	ENSG00000198815		1	1	1
hsa-miR-107	1		Experimentally Observed,Moderate (predicted)	1	1	2	1	FRK	ENSG00000111816
hsa-miR-107	1		Experimentally Observed,Moderate (predicted)	1	1	2	1	FUBP1	ENSG00000162613	1	1	1
hsa-miR-107	1		Experimentally Observed,Moderate (predicted)	1	1	40	1	FZD6	ENSG00000164930		1		1
hsa-miR-107	1		Experimentally Observed,Moderate (predicted)	1	1	17	1	G3BP2	ENSG00000138757	1	1	1
hsa-miR-107	1		Experimentally Observed,Moderate (predicted)	1			1	GAS2L3	ENSG00000139354
hsa-miR-107	1		Experimentally Observed,Moderate (predicted)	1	1	17	1	GATC	ENSG00000257218	1		1	1
hsa-miR-107	1		Experimentally Observed,Moderate (predicted)	1	1	23	1	GCC1	ENSG00000179562	1
hsa-miR-107	1		Experimentally Observed,Moderate (predicted)	1	1	72	1	GGA3	ENSG00000125447		1	1	1
hsa-miR-107	1		Experimentally Observed,Moderate (predicted)	1	1	16	1	GNG12	ENSG00000172380		1	1	1
hsa-miR-107	1		Experimentally Observed,Moderate (predicted)	1	1	14	1	GNPNAT1	ENSG00000100522	1		1
hsa-miR-107	1		Experimentally Observed,Moderate (predicted)	1	1	5	1	GOPC	ENSG00000047932	1		1	1
hsa-miR-107	1		Experimentally Observed,Moderate (predicted)	1	1	22	1	GPATCH8	ENSG00000186566	1	1	1	1
hsa-miR-107	1		Experimentally Observed,Moderate (predicted)	1			1	GRIN2B	ENSG00000273079
hsa-miR-107	1		Experimentally Observed,Moderate (predicted)	1	1	11	1	GSTCD	ENSG00000138780
hsa-miR-107	1		Experimentally Observed,Moderate (predicted)	1			1	HERC2	ENSG00000276802
hsa-miR-107	1		Experimentally Observed,Moderate (predicted)	1	1	6	1	HIST1H2BD	ENSG00000158373
hsa-miR-107	1		Experimentally Observed,Moderate (predicted)	1	1	30	1	HMGA2	ENSG00000149948
hsa-miR-107	1		Experimentally Observed,Moderate (predicted)	1	1	2	1	HOXD10	ENSG00000128710
hsa-miR-107	1		Experimentally Observed,Moderate (predicted)	1	1	20	1	HOXD13	ENSG00000128714
hsa-miR-107	1		Experimentally Observed,Moderate (predicted)	1	1	7	1	HSD17B12	ENSG00000149084	1
hsa-miR-107	1		Experimentally Observed,Moderate (predicted)	1	1	16	1	HUWE1	ENSG00000086758	1	1	1	1
hsa-miR-107	1		Experimentally Observed,Moderate (predicted)	1	1	15	1	IARS	ENSG00000196305		1
hsa-miR-107	1		Experimentally Observed,Moderate (predicted)	1	1	38	1	ICE1	ENSG00000164151
hsa-miR-107	1		Experimentally Observed,Moderate (predicted)	1	1	3	1	IDH3A	ENSG00000166411	1	1	1
hsa-miR-107	1		Experimentally Observed,Moderate (predicted)	1	1	32	1	IGSF3	ENSG00000143061	1	1	1	1
hsa-miR-107	1		Experimentally Observed,Moderate (predicted)	1	1	11	1	IL1RAP	ENSG00000196083	1	1	1	1
hsa-miR-107	1		Experimentally Observed,Moderate (predicted)	1	1	38	1	IRF2BP2	ENSG00000168264		1		1
hsa-miR-107	1		Experimentally Observed,Moderate (predicted)	1			1	IRS4	ENSG00000133124
hsa-miR-107	1		Experimentally Observed,Moderate (predicted)	1	1	2	1	ITM2C	ENSG00000135916		1
hsa-miR-107	1		Experimentally Observed,Moderate (predicted)	1	1	14	1	JADE1	ENSG00000077684	1	1	1	1
hsa-miR-107	1		Experimentally Observed,Moderate (predicted)	1	1	10	1	JAK1	ENSG00000162434		1	1
hsa-miR-107	1		Experimentally Observed,Moderate (predicted)	1	1	15	1	KAT7	ENSG00000136504	1	1	1
hsa-miR-107	1		Experimentally Observed,Moderate (predicted)	1	1	2	1	KCNG3	ENSG00000171126	1	1	1
hsa-miR-107	1		Experimentally Observed,Moderate (predicted)	1	1	9	1	KCNN4	ENSG00000104783		1
hsa-miR-107	1		Experimentally Observed,Moderate (predicted)	1	1	4	1	KCTD7	ENSG00000243335	1	1		1
hsa-miR-107	1		Experimentally Observed,Moderate (predicted)	1	1	39	1	KIF18B	ENSG00000186185
hsa-miR-107	1		Experimentally Observed,Moderate (predicted)	1	1	19	1	KIF21A	ENSG00000139116	1	1	1
hsa-miR-107	1		Experimentally Observed,Moderate (predicted)	1	1	45	1	KIF23	ENSG00000137807		1
hsa-miR-107	1		Experimentally Observed,Moderate (predicted)	1			1	KIF5C	ENSG00000276734
hsa-miR-107	1		Experimentally Observed,Moderate (predicted)	1	1	5	1	KLF7	ENSG00000118263	1	1
hsa-miR-107	1		Experimentally Observed,Moderate (predicted)	1	1	1	1	KPNB1	ENSG00000108424	1	1	1	1
hsa-miR-107	1		Experimentally Observed,Moderate (predicted)	1	1	17	1	LATS2	ENSG00000150457	1	1	1	1
hsa-miR-107	1		Experimentally Observed,Moderate (predicted)	1	1	13	1	LCOR	ENSG00000196233	1	1	1	1
hsa-miR-107	1		Experimentally Observed,Moderate (predicted)	1	1	25	1	MAF1	ENSG00000179632
hsa-miR-107	1		Experimentally Observed,Moderate (predicted)	1	1	15	1	MAP3K3	ENSG00000198909	1	1	1	1
hsa-miR-107	1		Experimentally Observed,Moderate (predicted)	1	1	21	1	MAP3K7	ENSG00000135341		1		1
hsa-miR-107	1		Experimentally Observed,Moderate (predicted)	1	1	16	1	MAP3K9	ENSG00000006432		1	1	1
hsa-miR-107	1		Experimentally Observed,Moderate (predicted)	1	1	37	1	MAP4	ENSG00000047849		1	1	1
hsa-miR-107	1		Experimentally Observed,Moderate (predicted)	1	1	20	1	MAPK8	ENSG00000107643
hsa-miR-107	1		Experimentally Observed,Moderate (predicted)	1	1	21	1	MAPRE1	ENSG00000101367	1	1	1	1
hsa-miR-107	1		Experimentally Observed,Moderate (predicted)	1	1	38	1	MBNL1	ENSG00000152601	1	1	1	1
hsa-miR-107	1		Experimentally Observed,Moderate (predicted)	1	1	10	1	MED11	ENSG00000161920
hsa-miR-107	1		Experimentally Observed,Moderate (predicted)	1	1	10	1	MED20	ENSG00000124641	1	1	1	1
hsa-miR-107	1		Experimentally Observed,Moderate (predicted)	1	1	28	1	MEF2D	ENSG00000116604		1		1
hsa-miR-107	1		Experimentally Observed,Moderate (predicted)	1			1	METTL9	ENSG00000284548
hsa-miR-107	1		Experimentally Observed,Moderate (predicted)	1	1	26	1	MFN2	ENSG00000116688	1	1	1	1
hsa-miR-107	1		Experimentally Observed,Moderate (predicted)	1	1	55	1	MIB1	ENSG00000101752		1		1
hsa-miR-107	1		Experimentally Observed,Moderate (predicted)	1			1	MICB	ENSG00000231179
hsa-miR-107	1		Experimentally Observed,Moderate (predicted)	1			1	MOB2	ENSG00000182208
hsa-miR-107	1		Experimentally Observed,Moderate (predicted)	1	1	2	1	MRPL48	ENSG00000175581
hsa-miR-107	1		Experimentally Observed,Moderate (predicted)	1	1	2	1	MSI2	ENSG00000153944	1	1		1
hsa-miR-107	1		Experimentally Observed,Moderate (predicted)	1	1	24	1	MT1E	ENSG00000169715			1
hsa-miR-107	1		Experimentally Observed,Moderate (predicted)	1	1	17	1	MTFR1L	ENSG00000117640	1	1	1	1
hsa-miR-107	1		Experimentally Observed,Moderate (predicted)	1	1	17	1	MTHFR	ENSG00000177000
hsa-miR-107	1		Experimentally Observed,Moderate (predicted)	1	1	2	1	MTMR10	ENSG00000166912				1
hsa-miR-107	1		Experimentally Observed,Moderate (predicted)	1	1	35	1	MTMR4	ENSG00000108389		1	1
hsa-miR-107	1		Experimentally Observed,Moderate (predicted)	1	1	29	1	MYB	ENSG00000118513		1		1
hsa-miR-107	1		Experimentally Observed,Moderate (predicted)	1	1	61	1	MYH9	ENSG00000100345		1	1	1
hsa-miR-107	1		Experimentally Observed,Moderate (predicted)	1	1	16	1	NAT8L	ENSG00000185818		1
hsa-miR-107	1		Experimentally Observed,Moderate (predicted)	1	1	6	1	NOP9	ENSG00000196943
hsa-miR-107	1		Experimentally Observed,Moderate (predicted)	1	1	68	1	NOTCH2	ENSG00000134250		1	1	1
hsa-miR-107	1		Experimentally Observed,Moderate (predicted)	1	1	31	1	NPEPPS	ENSG00000141279	1	1
hsa-miR-107	1		Experimentally Observed,Moderate (predicted)	1	1	26	1	NR2C2	ENSG00000177463	1	1	1	1
hsa-miR-107	1		Experimentally Observed,Moderate (predicted)	1	1	80	1	NRBP1	ENSG00000115216		1
hsa-miR-107	1		Experimentally Observed,Moderate (predicted)	1	1	4	1	ORC6	ENSG00000091651			1
hsa-miR-107	1		Experimentally Observed,Moderate (predicted)	1	1	39	1	PAFAH1B2	ENSG00000168092		1	1	1
hsa-miR-107	1		Experimentally Observed,Moderate (predicted)	1	1	19	1	PAG1	ENSG00000076641	1	1	1	1
hsa-miR-107	1		Experimentally Observed,Moderate (predicted)	1	1	19	1	PDCD11	ENSG00000148843		1	1
hsa-miR-107	1		Experimentally Observed,Moderate (predicted)	1	1	7	1	PDE4D	ENSG00000113448	1	1	1	1
hsa-miR-107	1		Experimentally Observed,Moderate (predicted)	1	1	24	1	PDIK1L	ENSG00000175087	1	1		1
hsa-miR-107	1		Experimentally Observed,Moderate (predicted)	1	1	21	1	PEG10	ENSG00000242265	1	1	1	1
hsa-miR-107	1		Experimentally Observed,Moderate (predicted)	1	1	13	1	PGAM5	ENSG00000247077			1	1
hsa-miR-107	1		Experimentally Observed,Moderate (predicted)	1	1	42	1	PLAG1	ENSG00000181690		1		1
hsa-miR-107	1		Experimentally Observed,Moderate (predicted)	1	1	3	1	PLAGL1	ENSG00000118495		1		1
hsa-miR-107	1		Experimentally Observed,Moderate (predicted)	1	1	37	1	PLEKHF2	ENSG00000175895		1		1
hsa-miR-107	1		Experimentally Observed,Moderate (predicted)	1	1	41	1	PNISR	ENSG00000132424		1
hsa-miR-107	1		Experimentally Observed,Moderate (predicted)	1	1	49	1	POLD3	ENSG00000077514		1	1	1
hsa-miR-107	1		Experimentally Observed,Moderate (predicted)	1	1	30	1	POU2F1	ENSG00000143190		1		1
hsa-miR-107	1		Experimentally Observed,Moderate (predicted)	1	1	34	1	PPIL1	ENSG00000137168	1		1	1
hsa-miR-107	1		Experimentally Observed,Moderate (predicted)	1	1	6	1	PPIP5K2	ENSG00000145725		1	1
hsa-miR-107	1		Experimentally Observed,Moderate (predicted)	1	1	7	1	PPME1	ENSG00000214517	1		1	1
hsa-miR-107	1		Experimentally Observed,Moderate (predicted)	1	1	32	1	PRKAB2	ENSG00000131791		1	1	1
hsa-miR-107	1		Experimentally Observed,Moderate (predicted)	1	1	7	1	PRKD3	ENSG00000115825		1	1	1
hsa-miR-107	1		Experimentally Observed,Moderate (predicted)	1			1	PRRT2	ENSG00000167371
hsa-miR-107	1		Experimentally Observed,Moderate (predicted)	1	1	8	1	PSMD3	ENSG00000108344
hsa-miR-107	1		Experimentally Observed,Moderate (predicted)	1	1	46	1	PTPN4	ENSG00000088179		1
hsa-miR-107	1		Experimentally Observed,Moderate (predicted)	1	1	13	1	QKI	ENSG00000112531	1	1	1	1
hsa-miR-107	1		Experimentally Observed,Moderate (predicted)	1	1	29	1	RAB11FIP2	ENSG00000107560	1	1	1	1
hsa-miR-107	1		Experimentally Observed,Moderate (predicted)	1	1	29	1	RAB1B	ENSG00000174903
hsa-miR-107	1		Experimentally Observed,Moderate (predicted)	1	1	13	1	RAI14	ENSG00000039560	1	1	1	1
hsa-miR-107	1		Experimentally Observed,Moderate (predicted)	1	1	20	1	RAP2C	ENSG00000123728		1
hsa-miR-107	1		Experimentally Observed,Moderate (predicted)	1	1	39	1	RASSF5	ENSG00000266094
hsa-miR-107	1		Experimentally Observed,Moderate (predicted)	1	1	57	1	RBBP6	ENSG00000122257		1
hsa-miR-107	1		Experimentally Observed,Moderate (predicted)	1	1	17	1	RDH10	ENSG00000121039	1	1	1	1
hsa-miR-107	1		Experimentally Observed,Moderate (predicted)	1	1	1	1	REXO2	ENSG00000076043
hsa-miR-107	1		Experimentally Observed,Moderate (predicted)	1	1	12	1	RGS4	ENSG00000117152		1		1
hsa-miR-107	1		Experimentally Observed,Moderate (predicted)	1	1	2	1	RGS5	ENSG00000143248	1	1	1	1
hsa-miR-107	1		Experimentally Observed,Moderate (predicted)	1			1	RHBDD3	ENSG00000100263
hsa-miR-107	1		Experimentally Observed,Moderate (predicted)	1	1	11	1	RNF157	ENSG00000141576				1
hsa-miR-107	1		Experimentally Observed,Moderate (predicted)	1	1	8	1	RNF24	ENSG00000101236			1	1
hsa-miR-107	1		Experimentally Observed,Moderate (predicted)	1	1	54	1	RNMT	ENSG00000101654		1	1	1
hsa-miR-107	1		Experimentally Observed,Moderate (predicted)	1	1	71	1	RPS6KA3	ENSG00000177189		1	1	1
hsa-miR-107	1		Experimentally Observed,Moderate (predicted)	1	1	4	1	RSU1	ENSG00000148484		1	1	1
hsa-miR-107	1		Experimentally Observed,Moderate (predicted)	1	1	20	1	SAV1	ENSG00000151748
hsa-miR-107	1		Experimentally Observed,Moderate (predicted)	1	1	16	1	SBDS	ENSG00000126524
hsa-miR-107	1		Experimentally Observed,Moderate (predicted)	1	1	14	1	SCAF8	ENSG00000213079		1
hsa-miR-107	1		Experimentally Observed,Moderate (predicted)	1	1	13	1	SEMA6D	ENSG00000137872		1		1
hsa-miR-107	1		Experimentally Observed,Moderate (predicted)	1	1	21	1	SETD1B	ENSG00000139718		1	1	1
hsa-miR-107	1		Experimentally Observed,Moderate (predicted)	1	1	32	1	SGMS2	ENSG00000164023		1		1
hsa-miR-107	1		Experimentally Observed,Moderate (predicted)	1	1	21	1	SH3BGRL2	ENSG00000198478			1	1
hsa-miR-107	1		Experimentally Observed,Moderate (predicted)	1	1	32	1	SIX4	ENSG00000100625	1	1	1	1
hsa-miR-107	1		Experimentally Observed,Moderate (predicted)	1	1	2	1	SLC1A4	ENSG00000115902				1
hsa-miR-107	1		Experimentally Observed,Moderate (predicted)	1	1	9	1	SLC29A3	ENSG00000198246
hsa-miR-107	1		Experimentally Observed,Moderate (predicted)	1	1	15	1	SLC2A3	ENSG00000059804	1	1	1	1
hsa-miR-107	1		Experimentally Observed,Moderate (predicted)	1	1	12	1	SLC35B2	ENSG00000157593	1	1
hsa-miR-107	1		Experimentally Observed,Moderate (predicted)	1	1	14	1	SLC35G1	ENSG00000176273	1	1	1	1
hsa-miR-107	1		Experimentally Observed,Moderate (predicted)	1	1	12	1	SLC52A2	ENSG00000185803
hsa-miR-107	1		Experimentally Observed,Moderate (predicted)	1	1	30	1	SOWAHC	ENSG00000198142	1	1	1	1
hsa-miR-107	1		Experimentally Observed,Moderate (predicted)	1	1	2	1	SPATA13	ENSG00000182957	1	1	1	1
hsa-miR-107	1		Experimentally Observed,Moderate (predicted)	1	1	12	1	SPDL1	ENSG00000040275
hsa-miR-107	1		Experimentally Observed,Moderate (predicted)	1	1	47	1	SPRED1	ENSG00000166068		1	1	1
hsa-miR-107	1		Experimentally Observed,Moderate (predicted)	1	1	4	1	SPRY1	ENSG00000164056		1		1
hsa-miR-107	1		Experimentally Observed,Moderate (predicted)	1	1	13	1	SPRY2	ENSG00000136158		1		1
hsa-miR-107	1		Experimentally Observed,Moderate (predicted)	1	1	15	1	SPTAN1	ENSG00000197694
hsa-miR-107	1		Experimentally Observed,Moderate (predicted)	1	1	27	1	SRM	ENSG00000116649
hsa-miR-107	1		Experimentally Observed,Moderate (predicted)	1	1	25	1	SRP72	ENSG00000174780		1	1	1
hsa-miR-107	1		Experimentally Observed,Moderate (predicted)	1	1	5	1	SRPX	ENSG00000101955
hsa-miR-107	1		Experimentally Observed,Moderate (predicted)	1	1	20	1	STARD7	ENSG00000084090	1	1	1	1
hsa-miR-107	1		Experimentally Observed,Moderate (predicted)	1	1	30	1	STK38	ENSG00000112079	1	1	1	1
hsa-miR-107	1		Experimentally Observed,Moderate (predicted)	1	1	2	1	STRIP1	ENSG00000143093			1
hsa-miR-107	1		Experimentally Observed,Moderate (predicted)	1	1	44	1	TACC1	ENSG00000147526	1	1	1	1
hsa-miR-107	1		Experimentally Observed,Moderate (predicted)	1	1	32	1	TAGLN2	ENSG00000158710			1
hsa-miR-107	1		Experimentally Observed,Moderate (predicted)	1	1	1	1	TANC2	ENSG00000170921		1		1
hsa-miR-107	1		Experimentally Observed,Moderate (predicted)	1			1	TARDBP	ENSG00000120948				1
hsa-miR-107	1		Experimentally Observed,Moderate (predicted)	1	1	18	1	TGFBR3	ENSG00000069702	1	1	1	1
hsa-miR-107	1		Experimentally Observed,Moderate (predicted)	1	1	33	1	TGIF2	ENSG00000118707
hsa-miR-107	1		Experimentally Observed,Moderate (predicted)	1	1	41	1	TLE4	ENSG00000106829		1		1
hsa-miR-107	1		Experimentally Observed,Moderate (predicted)	1	1	54	1	TLK1	ENSG00000198586		1		1
hsa-miR-107	1		Experimentally Observed,Moderate (predicted)	1	1	28	1	TMCC1	ENSG00000172765	1	1	1	1
hsa-miR-107	1		Experimentally Observed,Moderate (predicted)	1	1	19	1	TMED2	ENSG00000086598				1
hsa-miR-107	1		Experimentally Observed,Moderate (predicted)	1	1	21	1	TMEM170A	ENSG00000166822
hsa-miR-107	1		Experimentally Observed,Moderate (predicted)	1	1	28	1	TMEM184B	ENSG00000198792	1	1		1
hsa-miR-107	1		Experimentally Observed,Moderate (predicted)	1	1	16	1	TMEM33	ENSG00000109133	1	1		1
hsa-miR-107	1		Experimentally Observed,Moderate (predicted)	1	1	25	1	TNPO1	ENSG00000083312	1	1	1	1
hsa-miR-107	1		Experimentally Observed,Moderate (predicted)	1	1	2	1	TRAF3	ENSG00000131323	1	1
hsa-miR-107	1		Experimentally Observed,Moderate (predicted)	1	1	41	1	TRAPPC1	ENSG00000170043	1
hsa-miR-107	1		Experimentally Observed,Moderate (predicted)	1	1	10	1	TRIM71	ENSG00000206557
hsa-miR-107	1		Experimentally Observed,Moderate (predicted)	1			1	TUBGCP3	ENSG00000282003
hsa-miR-107	1		Experimentally Observed,Moderate (predicted)	1	1	12	1	UBAC1	ENSG00000130560
hsa-miR-107	1		Experimentally Observed,Moderate (predicted)	1	1	16	1	UBL3	ENSG00000122042	1	1	1	1
hsa-miR-107	1		Experimentally Observed,Moderate (predicted)	1	1	35	1	UHMK1	ENSG00000152332		1		1
hsa-miR-107	1		Experimentally Observed,Moderate (predicted)	1	1	1	1	UQCC1	ENSG00000101019				1
hsa-miR-107	1		Experimentally Observed,Moderate (predicted)	1	1	34	1	USP42	ENSG00000106346		1		1
hsa-miR-107	1		Experimentally Observed,Moderate (predicted)	1	1	13	1	USP6NL	ENSG00000148429	1	1	1	1
hsa-miR-107	1		Experimentally Observed,Moderate (predicted)	1	1	30	1	VMA21	ENSG00000160131		1		1
hsa-miR-107	1		Experimentally Observed,Moderate (predicted)	1	1	15	1	VPS33B	ENSG00000184056		1
hsa-miR-107	1		Experimentally Observed,Moderate (predicted)	1			1	VSTM2A	ENSG00000170419
hsa-miR-107	1		Experimentally Observed,Moderate (predicted)	1	1	10	1	WNT3A	ENSG00000154342
hsa-miR-107	1		Experimentally Observed,Moderate (predicted)	1	1	22	1	YIPF6	ENSG00000181704	1		1	1
hsa-miR-107	1		Experimentally Observed,Moderate (predicted)	1			1	YTHDC1	ENSG00000275272
hsa-miR-107	1		Experimentally Observed,Moderate (predicted)	1	1	1	1	ZBTB37	ENSG00000185278
hsa-miR-107	1		Experimentally Observed,Moderate (predicted)	1	1	22	1	ZBTB39	ENSG00000166860	1	1	1	1
hsa-miR-107	1		Experimentally Observed,Moderate (predicted)	1			1	ZBTB8A	ENSG00000160062
hsa-miR-107	1		Experimentally Observed,Moderate (predicted)	1	1	18	1	ZCCHC2	ENSG00000141664		1	1	1
hsa-miR-107	1		Experimentally Observed,Moderate (predicted)	1	1	25	1	ZDHHC16	ENSG00000171307		1		1
hsa-miR-107	1		Experimentally Observed,Moderate (predicted)	1			1	ZDHHC21	ENSG00000175893		1	1	1
hsa-miR-107	1		Experimentally Observed,Moderate (predicted)	1	1	13	1	ZMYM2	ENSG00000121741		1		1
hsa-miR-107	1		Experimentally Observed,Moderate (predicted)	1	1	1	1	ZNF284	ENSG00000186026
hsa-miR-107	1		Experimentally Observed,Moderate (predicted)	1	1	24	1	ZNF326	ENSG00000162664		1		1
hsa-miR-107	1		Experimentally Observed,Moderate (predicted)	1	1	6	1	ZNF680	ENSG00000173041			1	1
hsa-miR-107	1		Experimentally Observed,Moderate (predicted)	1	1	24	1	ZNF711	ENSG00000147180	1		1
hsa-miR-107			Experimentally Observed	1			1	ABCA3	ENSG00000167972			1
hsa-miR-107			Experimentally Observed	1	1	3	1	ABCB1	ENSG00000085563
hsa-miR-107			Experimentally Observed	1			1	ABCB4	ENSG00000005471
hsa-miR-107			Experimentally Observed	1			1	ABHD14A-ACY1	ENSG00000114786
hsa-miR-107			Experimentally Observed	1			1	ABHD14B	ENSG00000114779
hsa-miR-107			Experimentally Observed	1			1	ABHD17B	ENSG00000107362		1		1
hsa-miR-107			Experimentally Observed	1			1	ABHD6	ENSG00000163686
hsa-miR-107			Experimentally Observed	1	1	5	1	ABL1	ENSG00000097007				1
hsa-miR-107			Experimentally Observed	1			1	ABT1	ENSG00000146109			1	1
hsa-miR-107			Experimentally Observed	1	1	1	1	ACAD9	ENSG00000177646
hsa-miR-107			Experimentally Observed	1			1	ACADSB	ENSG00000196177	1
hsa-miR-107			Experimentally Observed	1	1	6	1	ACADVL	ENSG00000072778
hsa-miR-107			Experimentally Observed	1			1	ACAT1	ENSG00000075239	1		1
hsa-miR-107			Experimentally Observed	1			1	ACBD5	ENSG00000107897	1	1	1	1
hsa-miR-107			Experimentally Observed	1			1	ACIN1	ENSG00000100813	1	1
hsa-miR-107			Experimentally Observed	1	1	7	1	ACSL1	ENSG00000151726	1	1		1
hsa-miR-107			Experimentally Observed	1			1	ACSL3	ENSG00000123983	1	1		1
hsa-miR-107			Experimentally Observed	1	1	23	1	ACSL4	ENSG00000068366	1	1	1	1
hsa-miR-107			Experimentally Observed	1			1	ACTB	ENSG00000075624	1	1	1	1
hsa-miR-107			Experimentally Observed	1			1	ACTN1	ENSG00000072110		1
hsa-miR-107			Experimentally Observed	1	1	5	1	ADAR	ENSG00000160710		1		1
hsa-miR-107			Experimentally Observed	1			1	ADCY6	ENSG00000174233		1		1
hsa-miR-107			Experimentally Observed	1			1	ADI1	ENSG00000280830
hsa-miR-107			Experimentally Observed	1			1	ADIPOR1	ENSG00000159346	1	1
hsa-miR-107			Experimentally Observed	1			1	ADK	ENSG00000156110	1	1	1
hsa-miR-107			Experimentally Observed	1	1	11	1	ADNP2	ENSG00000101544		1	1	1
hsa-miR-107			Experimentally Observed	1	1	47	1	AEBP2	ENSG00000139154		1		1
hsa-miR-107			Experimentally Observed	1	1	15	1	AGO3	ENSG00000126070		1
hsa-miR-107			Experimentally Observed	1			1	AGPAT1	ENSG00000226467
hsa-miR-107			Experimentally Observed	1			1	AGPAT3	ENSG00000160216		1		1
hsa-miR-107			Experimentally Observed	1	1	14	1	AGPAT5	ENSG00000155189		1	1	1
hsa-miR-107			Experimentally Observed	1	1	11	1	AGRN	ENSG00000188157	1		1	1
hsa-miR-107			Experimentally Observed	1	1	1	1	AHNAK	ENSG00000124942		1		1
hsa-miR-107			Experimentally Observed	1	1	16	1	AK3	ENSG00000147853		1		1
hsa-miR-107			Experimentally Observed	1	1	21	1	AKAP10	ENSG00000108599				1
hsa-miR-107			Experimentally Observed	1	1	39	1	AKAP11	ENSG00000023516	1	1	1	1
hsa-miR-107			Experimentally Observed	1	1	9	1	AKAP13	ENSG00000170776		1		1
hsa-miR-107			Experimentally Observed	1			1	AKAP6	ENSG00000151320	1	1	1	1
hsa-miR-107			Experimentally Observed	1			1	AKAP9	ENSG00000127914		1
hsa-miR-107			Experimentally Observed	1	1	25	1	AKT2	ENSG00000105221			1
hsa-miR-107			Experimentally Observed	1			1	ALAS1	ENSG00000023330
hsa-miR-107			Experimentally Observed	1	1	4	1	ALB	ENSG00000163631
hsa-miR-107			Experimentally Observed	1			1	ALDH2	ENSG00000111275	1	1
hsa-miR-107			Experimentally Observed	1	1	2	1	ALDH3B1	ENSG00000006534			1	1
hsa-miR-107			Experimentally Observed	1			1	ALDH4A1	ENSG00000159423
hsa-miR-107			Experimentally Observed	1			1	ALDH6A1	ENSG00000119711
hsa-miR-107			Experimentally Observed	1			1	ALDOA	ENSG00000149925		1
hsa-miR-107			Experimentally Observed	1	1	46	1	ALG3	ENSG00000214160
hsa-miR-107			Experimentally Observed	1			1	AMDHD2	ENSG00000162066
hsa-miR-107			Experimentally Observed	1			1	AMFR	ENSG00000159461		1		1
hsa-miR-107			Experimentally Observed	1	1	15	1	ANAPC13	ENSG00000129055			1
hsa-miR-107			Experimentally Observed	1			1	ANAPC2	ENSG00000176248
hsa-miR-107			Experimentally Observed	1			1	ANGEL2	ENSG00000174606		1		1
hsa-miR-107			Experimentally Observed	1			1	ANK2	ENSG00000145362		1	1	1
hsa-miR-107			Experimentally Observed	1	1	51	1	ANKFY1	ENSG00000185722	1	1	1	1
hsa-miR-107			Experimentally Observed	1			1	ANKH	ENSG00000154122		1		1
hsa-miR-107			Experimentally Observed	1			1	ANKRA2	ENSG00000164331
hsa-miR-107			Experimentally Observed	1	1	14	1	ANKRD11	ENSG00000167522		1
hsa-miR-107			Experimentally Observed	1	1	4	1	ANKRD12	ENSG00000101745		1		1
hsa-miR-107			Experimentally Observed	1	1	17	1	ANKRD13B	ENSG00000198720
hsa-miR-107			Experimentally Observed	1	1	13	1	ANKRD17	ENSG00000132466		1	1	1
hsa-miR-107			Experimentally Observed	1			1	ANKRD23	ENSG00000163126				1
hsa-miR-107			Experimentally Observed	1			1	ANKRD26	ENSG00000107890
hsa-miR-107			Experimentally Observed	1	1	7	1	ANKRD46	ENSG00000186106			1
hsa-miR-107			Experimentally Observed	1	1	5	1	ANKRD50	ENSG00000151458	1	1	1	1
hsa-miR-107			Experimentally Observed	1	1	79	1	ANKRD52	ENSG00000139645	1	1
hsa-miR-107			Experimentally Observed	1	1	3	1	ANKS1A	ENSG00000064999		1	1	1
hsa-miR-107			Experimentally Observed	1	1	11	1	ANLN	ENSG00000011426		1
hsa-miR-107			Experimentally Observed	1			1	ANXA5	ENSG00000164111
hsa-miR-107			Experimentally Observed	1	1	2	1	AP1G1	ENSG00000166747	1	1	1	1
hsa-miR-107			Experimentally Observed	1	1	5	1	AP1S1	ENSG00000106367		1
hsa-miR-107			Experimentally Observed	1	1	3	1	AP1S2	ENSG00000182287		1		1
hsa-miR-107			Experimentally Observed	1			1	AP2A2	ENSG00000281385
hsa-miR-107			Experimentally Observed	1	1	11	1	AP2M1	ENSG00000161203
hsa-miR-107			Experimentally Observed	1	1	5	1	AP3B1	ENSG00000132842
hsa-miR-107			Experimentally Observed	1			1	AP3D1	ENSG00000065000			1	1
hsa-miR-107			Experimentally Observed	1			1	APBA2	ENSG00000034053
hsa-miR-107			Experimentally Observed	1	1	1	1	APBB2	ENSG00000163697	1	1	1	1
hsa-miR-107			Experimentally Observed	1	1	8	1	APC	ENSG00000134982	1	1	1	1
hsa-miR-107			Experimentally Observed	1			1	APEX2	ENSG00000169188
hsa-miR-107			Experimentally Observed	1	1	14	1	API5	ENSG00000166181
hsa-miR-107			Experimentally Observed	1			1	APLP1	ENSG00000105290	1	1	1
hsa-miR-107			Experimentally Observed	1	1	39	1	APLP2	ENSG00000084234	1		1
hsa-miR-107			Experimentally Observed	1			1	APOOL	ENSG00000155008	1		1	1
hsa-miR-107			Experimentally Observed	1	1	36	1	APP	ENSG00000142192		1		1
hsa-miR-107			Experimentally Observed	1	1	1	1	APPBP2	ENSG00000062725	1	1	1	1
hsa-miR-107			Experimentally Observed	1	1	1	1	ARAP1	ENSG00000186635
hsa-miR-107			Experimentally Observed	1			1	ARAP3	ENSG00000120318	1	1
hsa-miR-107			Experimentally Observed	1	1	18	1	ARCN1	ENSG00000095139	1	1	1	1
hsa-miR-107			Experimentally Observed	1	1	10	1	ARFGEF2	ENSG00000124198	1	1	1	1
hsa-miR-107			Experimentally Observed	1			1	ARGLU1	ENSG00000134884	1		1
hsa-miR-107			Experimentally Observed	1			1	ARHGAP21	ENSG00000107863
hsa-miR-107			Experimentally Observed	1			1	ARHGAP24	ENSG00000138639	1		1	1
hsa-miR-107			Experimentally Observed	1			1	ARHGAP4	ENSG00000089820
hsa-miR-107			Experimentally Observed	1	1	127	1	ARHGDIA	ENSG00000141522		1
hsa-miR-107			Experimentally Observed	1			1	ARHGEF1	ENSG00000076928
hsa-miR-107			Experimentally Observed	1	1	5	1	ARHGEF12	ENSG00000196914	1	1		1
hsa-miR-107			Experimentally Observed	1			1	ARHGEF15	ENSG00000198844				1
hsa-miR-107			Experimentally Observed	1			1	ARHGEF2	ENSG00000116584
hsa-miR-107			Experimentally Observed	1			1	ARID1A	ENSG00000117713	1	1	1	1
hsa-miR-107			Experimentally Observed	1			1	ARID5B	ENSG00000150347	1	1	1	1
hsa-miR-107			Experimentally Observed	1	1	7	1	ARL1	ENSG00000120805		1	1	1
hsa-miR-107			Experimentally Observed	1	1	4	1	ARL10	ENSG00000175414		1		1
hsa-miR-107			Experimentally Observed	1	1	102	1	ARL2	ENSG00000213465
hsa-miR-107			Experimentally Observed	1			1	ARL5A	ENSG00000162980	1	1	1	1
hsa-miR-107			Experimentally Observed	1	1	2	1	ARL6IP5	ENSG00000144746		1		1
hsa-miR-107			Experimentally Observed	1			1	ARMC5	ENSG00000140691			1
hsa-miR-107			Experimentally Observed	1			1	ARMCX3	ENSG00000102401		1		1
hsa-miR-107			Experimentally Observed	1			1	ARNTL2	ENSG00000029153
hsa-miR-107			Experimentally Observed	1	1	12	1	ARPP19	ENSG00000128989	1	1	1	1
hsa-miR-107			Experimentally Observed	1			1	ARSB	ENSG00000113273	1		1	1
hsa-miR-107			Experimentally Observed	1			1	ARSJ	ENSG00000180801		1	1	1
hsa-miR-107			Experimentally Observed	1	1	2	1	ASGR1	ENSG00000141505
hsa-miR-107			Experimentally Observed	1	1	9	1	ASPH	ENSG00000198363	1	1	1	1
hsa-miR-107			Experimentally Observed	1			1	ASPM	ENSG00000066279
hsa-miR-107			Experimentally Observed	1	1	45	1	ATF7	ENSG00000170653
hsa-miR-107			Experimentally Observed	1	1	12	1	ATF7IP	ENSG00000171681		1
hsa-miR-107			Experimentally Observed	1	1	16	1	ATG13	ENSG00000175224	1			1
hsa-miR-107			Experimentally Observed	1			1	ATG16L1	ENSG00000281089
hsa-miR-107			Experimentally Observed	1	1	3	1	ATG2B	ENSG00000066739	1	1		1
hsa-miR-107			Experimentally Observed	1			1	ATG9B	ENSG00000181652		1
hsa-miR-107			Experimentally Observed	1	1	58	1	ATL2	ENSG00000119787		1		1
hsa-miR-107			Experimentally Observed	1	1	3	1	ATP13A2	ENSG00000159363
hsa-miR-107			Experimentally Observed	1	1	18	1	ATP1B3	ENSG00000069849
hsa-miR-107			Experimentally Observed	1	1	41	1	ATP2A2	ENSG00000174437	1	1	1	1
hsa-miR-107			Experimentally Observed	1	1	6	1	ATP2B1	ENSG00000070961	1	1	1	1
hsa-miR-107			Experimentally Observed	1			1	ATP5A1	ENSG00000152234
hsa-miR-107			Experimentally Observed	1			1	ATP5B	ENSG00000110955
hsa-miR-107			Experimentally Observed	1			1	ATP5EP2	ENSG00000180389
hsa-miR-107			Experimentally Observed	1			1	ATP5O	ENSG00000241837
hsa-miR-107			Experimentally Observed	1	1	9	1	ATP6V0B	ENSG00000117410		1
hsa-miR-107			Experimentally Observed	1	1	21	1	ATP6V0E1	ENSG00000113732	1
hsa-miR-107			Experimentally Observed	1	1	11	1	ATP6V1C1	ENSG00000155097		1		1
hsa-miR-107			Experimentally Observed	1			1	ATP6V1G1	ENSG00000136888		1
hsa-miR-107			Experimentally Observed	1	1	1	1	ATP8B2	ENSG00000143515	1	1		1
hsa-miR-107			Experimentally Observed	1			1	ATRAID	ENSG00000138085
hsa-miR-107			Experimentally Observed	1			1	AZIN1	ENSG00000155096
hsa-miR-107			Experimentally Observed	1			1	B2M	ENSG00000273686
hsa-miR-107			Experimentally Observed	1			1	BABAM1	ENSG00000105393
hsa-miR-107			Experimentally Observed	1	1	2	1	BACE2	ENSG00000182240	1		1
hsa-miR-107			Experimentally Observed	1	1	42	1	BAZ2A	ENSG00000076108		1	1	1
hsa-miR-107			Experimentally Observed	1			1	BAZ2B	ENSG00000123636	1	1		1
hsa-miR-107			Experimentally Observed	1			1	BBX	ENSG00000114439	1	1	1	1
hsa-miR-107			Experimentally Observed	1			1	BCAP29	ENSG00000283852
hsa-miR-107			Experimentally Observed	1			1	BCAR1	ENSG00000050820
hsa-miR-107			Experimentally Observed	1			1	BCL9	ENSG00000116128
hsa-miR-107			Experimentally Observed	1	1	1	1	BCLAF1	ENSG00000029363				1
hsa-miR-107			Experimentally Observed	1			1	BDP1	ENSG00000273873
hsa-miR-107			Experimentally Observed	1	1	6	1	BICD2	ENSG00000185963	1	1	1	1
hsa-miR-107			Experimentally Observed	1			1	BIRC6	ENSG00000115760		1		1
hsa-miR-107			Experimentally Observed	1	1	2	1	BLOC1S2	ENSG00000196072		1		1
hsa-miR-107			Experimentally Observed	1			1	BMPR2	ENSG00000204217	1	1	1	1
hsa-miR-107			Experimentally Observed	1			1	BOD1L1	ENSG00000038219	1	1		1
hsa-miR-107			Experimentally Observed	1	1	6	1	BRAF	ENSG00000157764
hsa-miR-107			Experimentally Observed	1			1	BRD2	ENSG00000234507
hsa-miR-107			Experimentally Observed	1	1	16	1	BRD4	ENSG00000141867	1	1	1	1
hsa-miR-107			Experimentally Observed	1	1	10	1	BSG	ENSG00000172270		1
hsa-miR-107			Experimentally Observed	1	1	7	1	BTBD1	ENSG00000064726
hsa-miR-107			Experimentally Observed	1	1	1	1	BTBD2	ENSG00000133243	1		1	1
hsa-miR-107			Experimentally Observed	1			1	BTBD3	ENSG00000132640		1		1
hsa-miR-107			Experimentally Observed	1			1	BTBD7	ENSG00000277222
hsa-miR-107			Experimentally Observed	1	1	4	1	BTN3A1	ENSG00000026950	1		1	1
hsa-miR-107			Experimentally Observed	1	1	3	1	BTN3A3	ENSG00000111801			1	1
hsa-miR-107			Experimentally Observed	1	1	33	1	BTRC	ENSG00000166167		1	1	1
hsa-miR-107			Experimentally Observed	1			1	BUB1	ENSG00000169679
hsa-miR-107			Experimentally Observed	1			1	BZW2	ENSG00000136261
hsa-miR-107			Experimentally Observed	1			1	C10orf10	ENSG00000165507
hsa-miR-107			Experimentally Observed	1	1	5	1	C11orf58	ENSG00000110696	1		1	1
hsa-miR-107			Experimentally Observed	1	1	10	1	C12orf57	ENSG00000111678
hsa-miR-107			Experimentally Observed	1	1	19	1	C12orf76	ENSG00000174456		1		1
hsa-miR-107			Experimentally Observed	1	1	1	1	C16orf58	ENSG00000140688				1
hsa-miR-107			Experimentally Observed	1			1	C17orf49	ENSG00000258315
hsa-miR-107			Experimentally Observed	1			1	C19orf48	ENSG00000167747
hsa-miR-107			Experimentally Observed	1			1	C19orf68	ENSG00000185453
hsa-miR-107			Experimentally Observed	1			1	C1QBP	ENSG00000108561		1
hsa-miR-107			Experimentally Observed	1			1	C1QC	ENSG00000159189	1
hsa-miR-107			Experimentally Observed	1	1	2	1	C20orf194	ENSG00000088854	1	1		1
hsa-miR-107			Experimentally Observed	1	1	5	1	C21orf33	ENSG00000160221
hsa-miR-107			Experimentally Observed	1			1	C21orf59	ENSG00000159079
hsa-miR-107			Experimentally Observed	1	1	13	1	C2CD2	ENSG00000157617		1	1	1
hsa-miR-107			Experimentally Observed	1			1	C4orf48	ENSG00000243449
hsa-miR-107			Experimentally Observed	1	1	14	1	C5orf24	ENSG00000181904	1		1	1
hsa-miR-107			Experimentally Observed	1	1	14	1	C6orf120	ENSG00000185127		1	1	1
hsa-miR-107			Experimentally Observed	1			1	C7orf26	ENSG00000146576
hsa-miR-107			Experimentally Observed	1			1	C7orf50	ENSG00000146540				1
hsa-miR-107			Experimentally Observed	1	1	16	1	CA2	ENSG00000104267
hsa-miR-107			Experimentally Observed	1	1	13	1	CAAP1	ENSG00000120159		1	1
hsa-miR-107			Experimentally Observed	1			1	CAD	ENSG00000084774		1
hsa-miR-107			Experimentally Observed	1			1	CADM2	ENSG00000175161		1	1	1
hsa-miR-107			Experimentally Observed	1	1	3	1	CAMSAP3	ENSG00000076826		1
hsa-miR-107			Experimentally Observed	1			1	CAMTA2	ENSG00000108509			1	1
hsa-miR-107			Experimentally Observed	1	1	11	1	CANT1	ENSG00000171302		1		1
hsa-miR-107			Experimentally Observed	1			1	CAP1	ENSG00000131236	1	1		1
hsa-miR-107			Experimentally Observed	1	1	1	1	CAPN1	ENSG00000014216		1
hsa-miR-107			Experimentally Observed	1			1	CAPN15	ENSG00000103326	1	1	1	1
hsa-miR-107			Experimentally Observed	1			1	CAPNS1	ENSG00000126247
hsa-miR-107			Experimentally Observed	1	1	16	1	CAPRIN1	ENSG00000135387		1	1	1
hsa-miR-107			Experimentally Observed	1	1	18	1	CASP2	ENSG00000106144	1	1	1	1
hsa-miR-107			Experimentally Observed	1	1	37	1	CBX4	ENSG00000141582	1	1		1
hsa-miR-107			Experimentally Observed	1			1	CBX5	ENSG00000094916		1
hsa-miR-107			Experimentally Observed	1			1	CCDC102B	ENSG00000150636	1		1	1
hsa-miR-107			Experimentally Observed	1			1	CCDC127	ENSG00000164366
hsa-miR-107			Experimentally Observed	1			1	CCDC14	ENSG00000175455	1	1	1	1
hsa-miR-107			Experimentally Observed	1	1	14	1	CCDC47	ENSG00000108588		1		1
hsa-miR-107			Experimentally Observed	1			1	CCNA2	ENSG00000145386
hsa-miR-107			Experimentally Observed	1	1	6	1	CCNB1	ENSG00000134057		1
hsa-miR-107			Experimentally Observed	1			1	CCNB1IP1	ENSG00000100814
hsa-miR-107			Experimentally Observed	1	1	46	1	CCND1	ENSG00000110092	1	1	1	1
hsa-miR-107			Experimentally Observed	1	1	12	1	CCNF	ENSG00000162063	1	1	1	1
hsa-miR-107			Experimentally Observed	1			1	CCNG1	ENSG00000113328		1	1
hsa-miR-107			Experimentally Observed	1	1	12	1	CCNJ	ENSG00000107443
hsa-miR-107			Experimentally Observed	1	1	50	1	CCNT2	ENSG00000082258		1		1
hsa-miR-107			Experimentally Observed	1			1	CCR5	ENSG00000160791
hsa-miR-107			Experimentally Observed	1			1	CCSER1	ENSG00000184305	1	1	1	1
hsa-miR-107			Experimentally Observed	1			1	CCT4	ENSG00000115484	1	1	1
hsa-miR-107			Experimentally Observed	1			1	CCT7	ENSG00000135624
hsa-miR-107			Experimentally Observed	1			1	CCT8	ENSG00000156261
hsa-miR-107			Experimentally Observed	1	1	6	1	CD200R1	ENSG00000163606		1
hsa-miR-107			Experimentally Observed	1	1	16	1	CD276	ENSG00000103855				1
hsa-miR-107			Experimentally Observed	1	1	41	1	CD2AP	ENSG00000198087	1	1		1
hsa-miR-107			Experimentally Observed	1	1	5	1	CD47	ENSG00000196776	1	1	1	1
hsa-miR-107			Experimentally Observed	1	1	3	1	CD48	ENSG00000117091
hsa-miR-107			Experimentally Observed	1			1	CD55	ENSG00000196352		1		1
hsa-miR-107			Experimentally Observed	1	1	52	1	CD59	ENSG00000085063
hsa-miR-107			Experimentally Observed	1			1	CD63	ENSG00000135404		1
hsa-miR-107			Experimentally Observed	1	1	3	1	CDAN1	ENSG00000140326	1	1	1	1
hsa-miR-107			Experimentally Observed	1	1	11	1	CDC27	ENSG00000004897	1	1	1	1
hsa-miR-107			Experimentally Observed	1			1	CDC37	ENSG00000105401		1
hsa-miR-107			Experimentally Observed	1	1	2	1	CDC42EP1	ENSG00000128283			1	1
hsa-miR-107			Experimentally Observed	1	1	89	1	CDCA4	ENSG00000170779		1	1	1
hsa-miR-107			Experimentally Observed	1	1	2	1	CDCA7L	ENSG00000164649	1	1	1
hsa-miR-107			Experimentally Observed	1			1	CDIPT	ENSG00000103502
hsa-miR-107			Experimentally Observed	1			1	CDK1	ENSG00000170312
hsa-miR-107			Experimentally Observed	1	1	2	1	CDK12	ENSG00000167258		1	1	1
hsa-miR-107			Experimentally Observed	1			1	CDK13	ENSG00000065883	1	1	1
hsa-miR-107			Experimentally Observed	1	1	17	1	CDK16	ENSG00000102225		1		1
hsa-miR-107			Experimentally Observed	1			1	CDK2AP1	ENSG00000111328
hsa-miR-107			Experimentally Observed	1	1	28	1	CDK4	ENSG00000135446
hsa-miR-107			Experimentally Observed	1	1	20	1	CDKN1A	ENSG00000124762		1
hsa-miR-107			Experimentally Observed	1			1	CDR2L	ENSG00000109089	1	1	1	1
hsa-miR-107			Experimentally Observed	1			1	CEBPZ	ENSG00000115816
hsa-miR-107			Experimentally Observed	1	1	66	1	CELF1	ENSG00000149187		1
hsa-miR-107			Experimentally Observed	1	1	2	1	CELSR1	ENSG00000075275	1		1	1
hsa-miR-107			Experimentally Observed	1	1	9	1	CELSR2	ENSG00000143126		1		1
hsa-miR-107			Experimentally Observed	1			1	CENPJ	ENSG00000151849
hsa-miR-107			Experimentally Observed	1			1	CENPO	ENSG00000138092		1	1	1
hsa-miR-107			Experimentally Observed	1			1	CEP164	ENSG00000110274
hsa-miR-107			Experimentally Observed	1	1	4	1	CEP350	ENSG00000135837		1	1	1
hsa-miR-107			Experimentally Observed	1			1	CERS2	ENSG00000143418			1
hsa-miR-107			Experimentally Observed	1	1	16	1	CFLAR	ENSG00000003402
hsa-miR-107			Experimentally Observed	1	1	16	1	CGGBP1	ENSG00000163320		1		1
hsa-miR-107			Experimentally Observed	1	1	26	1	CHAC1	ENSG00000128965	1	1	1
hsa-miR-107			Experimentally Observed	1			1	CHAMP1	ENSG00000198824
hsa-miR-107			Experimentally Observed	1			1	CHD3	ENSG00000170004	1		1
hsa-miR-107			Experimentally Observed	1			1	CHD4	ENSG00000111642	1
hsa-miR-107			Experimentally Observed	1	1	15	1	CHD7	ENSG00000171316	1	1	1	1
hsa-miR-107			Experimentally Observed	1			1	CHD8	ENSG00000100888		1		1
hsa-miR-107			Experimentally Observed	1			1	CHERP	ENSG00000085872
hsa-miR-107			Experimentally Observed	1			1	CHMP1B	ENSG00000255112
hsa-miR-107			Experimentally Observed	1	1	17	1	CHMP3	ENSG00000115561			1	1
hsa-miR-107			Experimentally Observed	1			1	CHN1	ENSG00000128656				1
hsa-miR-107			Experimentally Observed	1	1	6	1	CHORDC1	ENSG00000110172		1		1
hsa-miR-107			Experimentally Observed	1	1	8	1	CHP1	ENSG00000187446	1	1	1	1
hsa-miR-107			Experimentally Observed	1			1	CHPF2	ENSG00000033100
hsa-miR-107			Experimentally Observed	1			1	CHRM1	ENSG00000168539	1		1
hsa-miR-107			Experimentally Observed	1	1	2	1	CHST14	ENSG00000169105	1		1
hsa-miR-107			Experimentally Observed	1			1	CHSY1	ENSG00000131873		1		1
hsa-miR-107			Experimentally Observed	1	1	32	1	CHUK	ENSG00000213341	1	1	1	1
hsa-miR-107			Experimentally Observed	1	1	6	1	CISD2	ENSG00000145354	1		1	1
hsa-miR-107			Experimentally Observed	1	1	3	1	CIZ1	ENSG00000148337
hsa-miR-107			Experimentally Observed	1	1	13	1	CKAP5	ENSG00000175216		1	1
hsa-miR-107			Experimentally Observed	1	1	14	1	CKB	ENSG00000166165
hsa-miR-107			Experimentally Observed	1	1	9	1	CLASP1	ENSG00000074054			1	1
hsa-miR-107			Experimentally Observed	1	1	9	1	CLCN5	ENSG00000171365	1	1	1	1
hsa-miR-107			Experimentally Observed	1	1	7	1	CLDN12	ENSG00000157224		1	1	1
hsa-miR-107			Experimentally Observed	1			1	CLDN4	ENSG00000189143			1	1
hsa-miR-107			Experimentally Observed	1	1	23	1	CLIP1	ENSG00000130779
hsa-miR-107			Experimentally Observed	1	1	3	1	CLN3	ENSG00000188603
hsa-miR-107			Experimentally Observed	1			1	CLN6	ENSG00000128973				1
hsa-miR-107			Experimentally Observed	1			1	CLPTM1L	ENSG00000274811
hsa-miR-107			Experimentally Observed	1			1	CLPX	ENSG00000166855
hsa-miR-107			Experimentally Observed	1	1	8	1	CLSTN1	ENSG00000171603	1	1		1
hsa-miR-107			Experimentally Observed	1			1	CLTB	ENSG00000175416
hsa-miR-107			Experimentally Observed	1			1	CLTC	ENSG00000141367		1	1	1
hsa-miR-107			Experimentally Observed	1			1	CMIP	ENSG00000153815	1	1	1	1
hsa-miR-107			Experimentally Observed	1			1	CMPK1	ENSG00000162368		1	1	1
hsa-miR-107			Experimentally Observed	1	1	23	1	CMTM4	ENSG00000183723		1		1
hsa-miR-107			Experimentally Observed	1			1	CNDP2	ENSG00000133313			1	1
hsa-miR-107			Experimentally Observed	1			1	CNIH4	ENSG00000143771		1
hsa-miR-107			Experimentally Observed	1			1	CNKSR3	ENSG00000153721				1
hsa-miR-107			Experimentally Observed	1			1	CNOT1	ENSG00000125107	1	1	1	1
hsa-miR-107			Experimentally Observed	1	1	13	1	CNOT10	ENSG00000182973	1
hsa-miR-107			Experimentally Observed	1	1	12	1	CNOT6	ENSG00000113300		1	1	1
hsa-miR-107			Experimentally Observed	1			1	CNOT8	ENSG00000155508			1
hsa-miR-107			Experimentally Observed	1			1	CNTN3	ENSG00000113805		1		1
hsa-miR-107			Experimentally Observed	1	1	4	1	COG1	ENSG00000166685
hsa-miR-107			Experimentally Observed	1			1	COG8	ENSG00000213380
hsa-miR-107			Experimentally Observed	1	1	11	1	COL1A1	ENSG00000108821
hsa-miR-107			Experimentally Observed	1			1	COL4A1	ENSG00000187498	1	1		1
hsa-miR-107			Experimentally Observed	1			1	COLGALT1	ENSG00000130309				1
hsa-miR-107			Experimentally Observed	1			1	COPA	ENSG00000122218	1	1	1	1
hsa-miR-107			Experimentally Observed	1			1	COPB1	ENSG00000129083
hsa-miR-107			Experimentally Observed	1			1	COPG2	ENSG00000158623
hsa-miR-107			Experimentally Observed	1			1	COPS5	ENSG00000121022
hsa-miR-107			Experimentally Observed	1			1	COPS6	ENSG00000168090	1
hsa-miR-107			Experimentally Observed	1	1	10	1	COPS7A	ENSG00000111652		1
hsa-miR-107			Experimentally Observed	1	1	18	1	COPS7B	ENSG00000144524		1		1
hsa-miR-107			Experimentally Observed	1	1	1	1	CORO7	ENSG00000262246
hsa-miR-107			Experimentally Observed	1			1	COX5A	ENSG00000178741
hsa-miR-107			Experimentally Observed	1			1	CPEB4	ENSG00000113742	1	1		1
hsa-miR-107			Experimentally Observed	1	1	12	1	CPSF6	ENSG00000111605	1	1	1	1
hsa-miR-107			Experimentally Observed	1	1	18	1	CPSF7	ENSG00000149532			1	1
hsa-miR-107			Experimentally Observed	1			1	CPT2	ENSG00000157184
hsa-miR-107			Experimentally Observed	1			1	CREB5	ENSG00000146592	1	1	1	1
hsa-miR-107			Experimentally Observed	1			1	CREBBP	ENSG00000005339		1		1
hsa-miR-107			Experimentally Observed	1	1	53	1	CREBRF	ENSG00000164463		1		1
hsa-miR-107			Experimentally Observed	1			1	CRIM1	ENSG00000277354
hsa-miR-107			Experimentally Observed	1	1	76	1	CRKL	ENSG00000099942	1	1		1
hsa-miR-107			Experimentally Observed	1			1	CRLS1	ENSG00000088766		1	1	1
hsa-miR-107			Experimentally Observed	1			1	CRNKL1	ENSG00000101343	1			1
hsa-miR-107			Experimentally Observed	1			1	CRTAP	ENSG00000170275	1	1	1	1
hsa-miR-107			Experimentally Observed	1	1	27	1	CSDE1	ENSG00000009307		1
hsa-miR-107			Experimentally Observed	1			1	CSE1L	ENSG00000124207
hsa-miR-107			Experimentally Observed	1	1	21	1	CSNK1A1	ENSG00000113712
hsa-miR-107			Experimentally Observed	1	1	5	1	CSNK2A1	ENSG00000101266		1		1
hsa-miR-107			Experimentally Observed	1			1	CSTF2T	ENSG00000177613
hsa-miR-107			Experimentally Observed	1			1	CTGF	ENSG00000118523		1
hsa-miR-107			Experimentally Observed	1			1	CTNNB1	ENSG00000168036	1		1
hsa-miR-107			Experimentally Observed	1	1	4	1	CTNNBIP1	ENSG00000178585		1		1
hsa-miR-107			Experimentally Observed	1	1	19	1	CTNND1	ENSG00000198561		1		1
hsa-miR-107			Experimentally Observed	1			1	CTR9	ENSG00000198730	1
hsa-miR-107			Experimentally Observed	1			1	CTSA	ENSG00000064601	1	1	1
hsa-miR-107			Experimentally Observed	1	1	51	1	CTTNBP2	ENSG00000077063
hsa-miR-107			Experimentally Observed	1	1	14	1	CUL2	ENSG00000108094	1	1	1	1
hsa-miR-107			Experimentally Observed	1			1	CUL4B	ENSG00000158290		1		1
hsa-miR-107			Experimentally Observed	1			1	CUL9	ENSG00000112659
hsa-miR-107			Experimentally Observed	1	1	20	1	CYB561A3	ENSG00000162144			1	1
hsa-miR-107			Experimentally Observed	1	1	5	1	CYFIP1	ENSG00000273749
hsa-miR-107			Experimentally Observed	1			1	CYP51A1	ENSG00000001630
hsa-miR-107			Experimentally Observed	1			1	CYR61	ENSG00000142871		1		1
hsa-miR-107			Experimentally Observed	1			1	CYTH2	ENSG00000105443			1	1
hsa-miR-107			Experimentally Observed	1			1	DACT2	ENSG00000164488
hsa-miR-107			Experimentally Observed	1	1	2	1	DAG1	ENSG00000173402	1	1	1	1
hsa-miR-107			Experimentally Observed	1	1	18	1	DAPK1	ENSG00000196730
hsa-miR-107			Experimentally Observed	1			1	DCAF13	ENSG00000164934
hsa-miR-107			Experimentally Observed	1			1	DCBLD1	ENSG00000164465
hsa-miR-107			Experimentally Observed	1	1	1	1	DCLK1	ENSG00000133083	1	1	1	1
hsa-miR-107			Experimentally Observed	1	1	2	1	DCTN1	ENSG00000204843
hsa-miR-107			Experimentally Observed	1	1	43	1	DCTN2	ENSG00000175203		1	1
hsa-miR-107			Experimentally Observed	1	1	1	1	DCUN1D1	ENSG00000043093	1	1		1
hsa-miR-107			Experimentally Observed	1	1	5	1	DCXR	ENSG00000169738
hsa-miR-107			Experimentally Observed	1			1	DDAH1	ENSG00000153904	1	1	1	1
hsa-miR-107			Experimentally Observed	1	1	2	1	DDB1	ENSG00000167986		1		1
hsa-miR-107			Experimentally Observed	1			1	DDI2	ENSG00000197312	1	1
hsa-miR-107			Experimentally Observed	1			1	DDIT4	ENSG00000168209		1	1	1
hsa-miR-107			Experimentally Observed	1			1	DDOST	ENSG00000244038			1
hsa-miR-107			Experimentally Observed	1			1	DDX17	ENSG00000100201		1	1	1
hsa-miR-107			Experimentally Observed	1	1	8	1	DDX18	ENSG00000088205				1
hsa-miR-107			Experimentally Observed	1			1	DDX21	ENSG00000165732		1		1
hsa-miR-107			Experimentally Observed	1			1	DDX24	ENSG00000273761
hsa-miR-107			Experimentally Observed	1	1	22	1	DDX3X	ENSG00000215301	1	1	1
hsa-miR-107			Experimentally Observed	1	1	8	1	DDX54	ENSG00000123064	1	1	1	1
hsa-miR-107			Experimentally Observed	1			1	DDX56	ENSG00000136271
hsa-miR-107			Experimentally Observed	1	1	2	1	DDX6	ENSG00000110367		1	1
hsa-miR-107			Experimentally Observed	1			1	DEGS1	ENSG00000143753	1
hsa-miR-107			Experimentally Observed	1			1	DENND4A	ENSG00000174485	1	1	1	1
hsa-miR-107			Experimentally Observed	1			1	DENND4B	ENSG00000198837
hsa-miR-107			Experimentally Observed	1			1	DHCR24	ENSG00000116133		1		1
hsa-miR-107			Experimentally Observed	1	1	6	1	DHCR7	ENSG00000172893				1
hsa-miR-107			Experimentally Observed	1			1	DHRS13	ENSG00000167536		1
hsa-miR-107			Experimentally Observed	1			1	DHRS7	ENSG00000100612
hsa-miR-107			Experimentally Observed	1			1	DHX9	ENSG00000135829
hsa-miR-107			Experimentally Observed	1	1	15	1	DIAPH1	ENSG00000131504		1		1
hsa-miR-107			Experimentally Observed	1	1	176	1	DICER1	ENSG00000100697		1		1
hsa-miR-107			Experimentally Observed	1			1	DLAT	ENSG00000150768
hsa-miR-107			Experimentally Observed	1			1	DLD	ENSG00000091140				1
hsa-miR-107			Experimentally Observed	1			1	DLL3	ENSG00000090932
hsa-miR-107			Experimentally Observed	1			1	DMWD	ENSG00000185800	1	1	1
hsa-miR-107			Experimentally Observed	1			1	DNA2	ENSG00000138346
hsa-miR-107			Experimentally Observed	1			1	DNAH14	ENSG00000185842
hsa-miR-107			Experimentally Observed	1	1	12	1	DNAJB6	ENSG00000105993		1		1
hsa-miR-107			Experimentally Observed	1	1	21	1	DNAJC5	ENSG00000101152		1
hsa-miR-107			Experimentally Observed	1	1	11	1	DNAJC8	ENSG00000126698		1
hsa-miR-107			Experimentally Observed	1	1	21	1	DNAJC9	ENSG00000213551
hsa-miR-107			Experimentally Observed	1			1	DNER	ENSG00000187957
hsa-miR-107			Experimentally Observed	1	1	2	1	DNHD1	ENSG00000179532	1		1
hsa-miR-107			Experimentally Observed	1			1	DNM2	ENSG00000079805
hsa-miR-107			Experimentally Observed	1			1	DNMT3B	ENSG00000088305	1	1	1	1
hsa-miR-107			Experimentally Observed	1			1	DOC2A	ENSG00000149927		1		1
hsa-miR-107			Experimentally Observed	1	1	2	1	DOCK6	ENSG00000130158
hsa-miR-107			Experimentally Observed	1	1	13	1	DOLPP1	ENSG00000167130		1	1	1
hsa-miR-107			Experimentally Observed	1			1	DPM3	ENSG00000179085
hsa-miR-107			Experimentally Observed	1			1	DPP3	ENSG00000254986		1
hsa-miR-107			Experimentally Observed	1	1	6	1	DPP8	ENSG00000074603		1	1	1
hsa-miR-107			Experimentally Observed	1			1	DPY19L3	ENSG00000178904		1	1	1
hsa-miR-107			Experimentally Observed	1	1	7	1	DPYSL2	ENSG00000092964	1	1	1	1
hsa-miR-107			Experimentally Observed	1			1	DR1	ENSG00000117505		1
hsa-miR-107			Experimentally Observed	1			1	DRAM2	ENSG00000156171	1			1
hsa-miR-107			Experimentally Observed	1			1	DSCR3	ENSG00000157538	1	1	1	1
hsa-miR-107			Experimentally Observed	1			1	DSE	ENSG00000111817	1	1	1
hsa-miR-107			Experimentally Observed	1			1	DSEL	ENSG00000262102
hsa-miR-107			Experimentally Observed	1			1	DSP	ENSG00000096696
hsa-miR-107			Experimentally Observed	1			1	DST	ENSG00000151914	1	1	1
hsa-miR-107			Experimentally Observed	1	1	10	1	DUSP1	ENSG00000120129
hsa-miR-107			Experimentally Observed	1			1	DUSP6	ENSG00000139318		1		1
hsa-miR-107			Experimentally Observed	1			1	DYNC1H1	ENSG00000197102
hsa-miR-107			Experimentally Observed	1	1	11	1	DYNC1LI2	ENSG00000135720		1	1	1
hsa-miR-107			Experimentally Observed	1	1	10	1	DYNLT3	ENSG00000165169
hsa-miR-107			Experimentally Observed	1			1	DYRK1B	ENSG00000281320
hsa-miR-107			Experimentally Observed	1	1	56	1	DYRK2	ENSG00000127334	1	1	1	1
hsa-miR-107			Experimentally Observed	1			1	DYSF	ENSG00000135636
hsa-miR-107			Experimentally Observed	1	1	4	1	DZIP1	ENSG00000134874		1	1	1
hsa-miR-107			Experimentally Observed	1			1	E2F1	ENSG00000101412		1	1	1
hsa-miR-107			Experimentally Observed	1	1	39	1	E2F3	ENSG00000112242	1	1	1	1
hsa-miR-107			Experimentally Observed	1	1	14	1	ECHS1	ENSG00000127884
hsa-miR-107			Experimentally Observed	1			1	ECSCR	ENSG00000249751
hsa-miR-107			Experimentally Observed	1	1	14	1	EDC3	ENSG00000179151				1
hsa-miR-107			Experimentally Observed	1			1	EEF1B2	ENSG00000283391
hsa-miR-107			Experimentally Observed	1			1	EEF1D	ENSG00000104529
hsa-miR-107			Experimentally Observed	1			1	EEF2	ENSG00000167658		1		1
hsa-miR-107			Experimentally Observed	1			1	EFNA1	ENSG00000169242
hsa-miR-107			Experimentally Observed	1	1	7	1	EFNB2	ENSG00000125266			1	1
hsa-miR-107			Experimentally Observed	1	1	11	1	EGLN2	ENSG00000269858
hsa-miR-107			Experimentally Observed	1			1	EGR1	ENSG00000120738			1
hsa-miR-107			Experimentally Observed	1			1	EHMT1	ENSG00000181090		1		1
hsa-miR-107			Experimentally Observed	1	1	15	1	EI24	ENSG00000149547
hsa-miR-107			Experimentally Observed	1	1	25	1	EIF2AK1	ENSG00000086232		1	1	1
hsa-miR-107			Experimentally Observed	1			1	EIF2AK4	ENSG00000128829			1
hsa-miR-107			Experimentally Observed	1	1	3	1	EIF2B2	ENSG00000119718
hsa-miR-107			Experimentally Observed	1	1	4	1	EIF2S2	ENSG00000125977	1	1	1	1
hsa-miR-107			Experimentally Observed	1			1	EIF3F	ENSG00000280606
hsa-miR-107			Experimentally Observed	1			1	EIF4E2	ENSG00000135930
hsa-miR-107			Experimentally Observed	1			1	EIF4G1	ENSG00000114867
hsa-miR-107			Experimentally Observed	1	1	24	1	EIF4G2	ENSG00000110321		1
hsa-miR-107			Experimentally Observed	1			1	ELK3	ENSG00000111145		1
hsa-miR-107			Experimentally Observed	1	1	35	1	ELL	ENSG00000105656		1		1
hsa-miR-107			Experimentally Observed	1	1	52	1	ELMSAN1	ENSG00000156030		1		1
hsa-miR-107			Experimentally Observed	1	1	1	1	ELOVL7	ENSG00000164181			1	1
hsa-miR-107			Experimentally Observed	1			1	ELP2	ENSG00000134759		1
hsa-miR-107			Experimentally Observed	1			1	EMC7	ENSG00000134153
hsa-miR-107			Experimentally Observed	1			1	EMC9	ENSG00000100908
hsa-miR-107			Experimentally Observed	1			1	EMD	ENSG00000102119
hsa-miR-107			Experimentally Observed	1	1	37	1	EML4	ENSG00000143924		1		1
hsa-miR-107			Experimentally Observed	1	1	7	1	EMP1	ENSG00000134531			1	1
hsa-miR-107			Experimentally Observed	1	1	39	1	EN2	ENSG00000164778
hsa-miR-107			Experimentally Observed	1	1	14	1	ENG	ENSG00000106991
hsa-miR-107			Experimentally Observed	1			1	ENHO	ENSG00000168913			1
hsa-miR-107			Experimentally Observed	1			1	ENO1	ENSG00000074800
hsa-miR-107			Experimentally Observed	1	1	1	1	ENO3	ENSG00000108515
hsa-miR-107			Experimentally Observed	1	1	19	1	ENPP4	ENSG00000001561	1	1	1	1
hsa-miR-107			Experimentally Observed	1	1	2	1	ENTPD4	ENSG00000197217	1	1	1	1
hsa-miR-107			Experimentally Observed	1			1	EP400	ENSG00000183495			1	1
hsa-miR-107			Experimentally Observed	1	1	20	1	EPB41L4B	ENSG00000095203	1	1	1	1
hsa-miR-107			Experimentally Observed	1			1	EPC1	ENSG00000120616
hsa-miR-107			Experimentally Observed	1	1	12	1	EPHA2	ENSG00000142627		1
hsa-miR-107			Experimentally Observed	1			1	EPHX4	ENSG00000172031
hsa-miR-107			Experimentally Observed	1	1	15	1	EPM2AIP1	ENSG00000178567	1		1	1
hsa-miR-107			Experimentally Observed	1			1	EPS15	ENSG00000085832		1	1	1
hsa-miR-107			Experimentally Observed	1	1	1	1	EPS8L2	ENSG00000177106
hsa-miR-107			Experimentally Observed	1			1	ERC1	ENSG00000283017
hsa-miR-107			Experimentally Observed	1			1	ERCC3	ENSG00000163161
hsa-miR-107			Experimentally Observed	1	1	3	1	ERF	ENSG00000105722
hsa-miR-107			Experimentally Observed	1			1	ERMN	ENSG00000136541		1	1	1
hsa-miR-107			Experimentally Observed	1			1	ESD	ENSG00000139684
hsa-miR-107			Experimentally Observed	1			1	ESM1	ENSG00000164283
hsa-miR-107			Experimentally Observed	1	1	26	1	ESRP2	ENSG00000103067	1	1		1
hsa-miR-107			Experimentally Observed	1			1	ESYT2	ENSG00000117868	1	1	1	1
hsa-miR-107			Experimentally Observed	1	1	33	1	ETNK1	ENSG00000139163		1		1
hsa-miR-107			Experimentally Observed	1	1	2	1	ETS2	ENSG00000157557		1		1
hsa-miR-107			Experimentally Observed	1	1	3	1	ETV1	ENSG00000006468	1	1	1	1
hsa-miR-107			Experimentally Observed	1			1	ETV6	ENSG00000139083		1		1
hsa-miR-107			Experimentally Observed	1			1	EXD3	ENSG00000187609
hsa-miR-107			Experimentally Observed	1			1	EXOC4	ENSG00000131558		1	1
hsa-miR-107			Experimentally Observed	1	1	3	1	EXOSC6	ENSG00000223496				1
hsa-miR-107			Experimentally Observed	1	1	25	1	EXT2	ENSG00000151348				1
hsa-miR-107			Experimentally Observed	1	1	2	1	EXTL3	ENSG00000012232	1	1	1	1
hsa-miR-107			Experimentally Observed	1			1	F12	ENSG00000131187
hsa-miR-107			Experimentally Observed	1			1	F2R	ENSG00000181104	1	1	1	1
hsa-miR-107			Experimentally Observed	1	1	5	1	F2RL1	ENSG00000164251			1	1
hsa-miR-107			Experimentally Observed	1			1	FAAH	ENSG00000117480
hsa-miR-107			Experimentally Observed	1			1	FADD	ENSG00000168040
hsa-miR-107			Experimentally Observed	1	1	16	1	FAM102A	ENSG00000167106		1		1
hsa-miR-107			Experimentally Observed	1	1	5	1	FAM120A	ENSG00000048828	1	1	1	1
hsa-miR-107			Experimentally Observed	1			1	FAM126A	ENSG00000122591	1	1		1
hsa-miR-107			Experimentally Observed	1	1	25	1	FAM160B1	ENSG00000151553	1	1		1
hsa-miR-107			Experimentally Observed	1	1	5	1	FAM168B	ENSG00000152102	1
hsa-miR-107			Experimentally Observed	1	1	9	1	FAM171A1	ENSG00000148468
hsa-miR-107			Experimentally Observed	1			1	FAM171B	ENSG00000144369	1	1	1
hsa-miR-107			Experimentally Observed	1			1	FAM181B	ENSG00000182103
hsa-miR-107			Experimentally Observed	1	1	2	1	FAM213A	ENSG00000122378		1		1
hsa-miR-107			Experimentally Observed	1			1	FAM219A	ENSG00000164970		1	1	1
hsa-miR-107			Experimentally Observed	1			1	FAM43A	ENSG00000185112		1		1
hsa-miR-107			Experimentally Observed	1			1	FAM49B	ENSG00000153310	1	1
hsa-miR-107			Experimentally Observed	1			1	FAM60A	ENSG00000139146		1		1
hsa-miR-107			Experimentally Observed	1			1	FAM69B	ENSG00000165716	1			1
hsa-miR-107			Experimentally Observed	1	1	4	1	FAM81A	ENSG00000157470		1	1	1
hsa-miR-107			Experimentally Observed	1	1	6	1	FAM84B	ENSG00000168672			1
hsa-miR-107			Experimentally Observed	1			1	FANCA	ENSG00000187741
hsa-miR-107			Experimentally Observed	1			1	FARP2	ENSG00000006607			1
hsa-miR-107			Experimentally Observed	1	1	6	1	FARSA	ENSG00000179115
hsa-miR-107			Experimentally Observed	1			1	FASTK	ENSG00000164896		1
hsa-miR-107			Experimentally Observed	1	1	7	1	FAT4	ENSG00000196159		1
hsa-miR-107			Experimentally Observed	1			1	FBL	ENSG00000280548
hsa-miR-107			Experimentally Observed	1			1	FBRS	ENSG00000156860		1		1
hsa-miR-107			Experimentally Observed	1			1	FBXL16	ENSG00000127585		1	1	1
hsa-miR-107			Experimentally Observed	1			1	FBXL19	ENSG00000099364	1	1	1	1
hsa-miR-107			Experimentally Observed	1	1	33	1	FBXO3	ENSG00000110429	1	1	1
hsa-miR-107			Experimentally Observed	1	1	1	1	FBXO34	ENSG00000178974		1		1
hsa-miR-107			Experimentally Observed	1	1	3	1	FBXO41	ENSG00000163013	1	1	1	1
hsa-miR-107			Experimentally Observed	1			1	FBXO46	ENSG00000177051
hsa-miR-107			Experimentally Observed	1			1	FBXO5	ENSG00000112029
hsa-miR-107			Experimentally Observed	1			1	FBXW2	ENSG00000119402	1	1	1
hsa-miR-107			Experimentally Observed	1	1	15	1	FDFT1	ENSG00000079459			1
hsa-miR-107			Experimentally Observed	1			1	FEM1A	ENSG00000141965
hsa-miR-107			Experimentally Observed	1	1	4	1	FEM1C	ENSG00000145780	1	1	1	1
hsa-miR-107			Experimentally Observed	1			1	FEN1	ENSG00000168496
hsa-miR-107			Experimentally Observed	1			1	FGD4	ENSG00000139132	1	1	1	1
hsa-miR-107			Experimentally Observed	1	1	1	1	FGF12	ENSG00000114279		1	1	1
hsa-miR-107			Experimentally Observed	1	1	68	1	FGF2	ENSG00000138685		1		1
hsa-miR-107			Experimentally Observed	1			1	FH	ENSG00000091483
hsa-miR-107			Experimentally Observed	1			1	FHL1	ENSG00000022267		1
hsa-miR-107			Experimentally Observed	1			1	FITM1	ENSG00000139914
hsa-miR-107			Experimentally Observed	1			1	FKBP11	ENSG00000134285
hsa-miR-107			Experimentally Observed	1			1	FLAD1	ENSG00000160688
hsa-miR-107			Experimentally Observed	1	1	2	1	FLNB	ENSG00000136068		1		1
hsa-miR-107			Experimentally Observed	1			1	FLNC	ENSG00000128591	1	1	1
hsa-miR-107			Experimentally Observed	1			1	FLOT1	ENSG00000236271
hsa-miR-107			Experimentally Observed	1			1	FLT1	ENSG00000102755	1		1	1
hsa-miR-107			Experimentally Observed	1			1	FMNL3	ENSG00000161791		1
hsa-miR-107			Experimentally Observed	1	1	19	1	FNDC3A	ENSG00000102531	1	1	1	1
hsa-miR-107			Experimentally Observed	1	1	20	1	FNDC3B	ENSG00000075420		1		1
hsa-miR-107			Experimentally Observed	1	1	14	1	FNIP1	ENSG00000217128			1	1
hsa-miR-107			Experimentally Observed	1			1	FOCAD	ENSG00000188352
hsa-miR-107			Experimentally Observed	1	1	39	1	FOSL2	ENSG00000075426	1	1		1
hsa-miR-107			Experimentally Observed	1	1	58	1	FOXK1	ENSG00000164916
hsa-miR-107			Experimentally Observed	1			1	FRMD4A	ENSG00000151474		1		1
hsa-miR-107			Experimentally Observed	1			1	FRMD4B	ENSG00000114541		1	1	1
hsa-miR-107			Experimentally Observed	1			1	FRMPD3	ENSG00000147234
hsa-miR-107			Experimentally Observed	1			1	FRY	ENSG00000073910	1	1	1	1
hsa-miR-107			Experimentally Observed	1	1	10	1	FSCN1	ENSG00000075618	1	1	1	1
hsa-miR-107			Experimentally Observed	1	1	2	1	FUT4	ENSG00000196371
hsa-miR-107			Experimentally Observed	1	1	4	1	FYCO1	ENSG00000163820	1	1	1	1
hsa-miR-107			Experimentally Observed	1			1	FZD2	ENSG00000180340	1	1	1	1
hsa-miR-107			Experimentally Observed	1	1	50	1	G3BP1	ENSG00000145907	1			1
hsa-miR-107			Experimentally Observed	1	1	30	1	GABARAPL1	ENSG00000139112		1		1
hsa-miR-107			Experimentally Observed	1			1	GABBR2	ENSG00000136928		1		1
hsa-miR-107			Experimentally Observed	1			1	GAD1	ENSG00000128683				1
hsa-miR-107			Experimentally Observed	1			1	GADD45A	ENSG00000116717
hsa-miR-107			Experimentally Observed	1			1	GADD45GIP1	ENSG00000179271
hsa-miR-107			Experimentally Observed	1	1	8	1	GALNT1	ENSG00000141429		1		1
hsa-miR-107			Experimentally Observed	1			1	GALNT3	ENSG00000115339		1		1
hsa-miR-107			Experimentally Observed	1			1	GAPVD1	ENSG00000165219
hsa-miR-107			Experimentally Observed	1			1	GARS	ENSG00000106105	1	1
hsa-miR-107			Experimentally Observed	1			1	GATA2	ENSG00000179348		1	1
hsa-miR-107			Experimentally Observed	1			1	GATAD2B	ENSG00000261992
hsa-miR-107			Experimentally Observed	1	1	5	1	GBF1	ENSG00000107862		1
hsa-miR-107			Experimentally Observed	1			1	GDE1	ENSG00000006007		1	1	1
hsa-miR-107			Experimentally Observed	1			1	GDPGP1	ENSG00000183208
hsa-miR-107			Experimentally Observed	1	1	6	1	GEMIN5	ENSG00000082516	1		1
hsa-miR-107			Experimentally Observed	1			1	GEMIN8	ENSG00000046647			1	1
hsa-miR-107			Experimentally Observed	1	1	15	1	GET4	ENSG00000239857
hsa-miR-107			Experimentally Observed	1	1	3	1	GFAP	ENSG00000131095	1	1	1	1
hsa-miR-107			Experimentally Observed	1			1	GFOD2	ENSG00000141098	1		1
hsa-miR-107			Experimentally Observed	1			1	GGA2	ENSG00000103365	1	1		1
hsa-miR-107			Experimentally Observed	1			1	GHITM	ENSG00000165678		1	1	1
hsa-miR-107			Experimentally Observed	1	1	30	1	GIGYF1	ENSG00000146830		1		1
hsa-miR-107			Experimentally Observed	1	1	6	1	GIT1	ENSG00000108262
hsa-miR-107			Experimentally Observed	1			1	GJA1	ENSG00000152661		1		1
hsa-miR-107			Experimentally Observed	1			1	GJB6	ENSG00000121742
hsa-miR-107			Experimentally Observed	1			1	GLCE	ENSG00000138604	1	1	1	1
hsa-miR-107			Experimentally Observed	1	1	6	1	GLE1	ENSG00000119392		1		1
hsa-miR-107			Experimentally Observed	1			1	GLI2	ENSG00000074047		1	1	1
hsa-miR-107			Experimentally Observed	1	1	3	1	GLS	ENSG00000115419		1		1
hsa-miR-107			Experimentally Observed	1			1	GLTP	ENSG00000139433		1	1	1
hsa-miR-107			Experimentally Observed	1			1	GLUL	ENSG00000135821				1
hsa-miR-107			Experimentally Observed	1	1	3	1	GLYR1	ENSG00000140632	1		1
hsa-miR-107			Experimentally Observed	1	1	2	1	GMPS	ENSG00000163655
hsa-miR-107			Experimentally Observed	1			1	GNA11	ENSG00000088256
hsa-miR-107			Experimentally Observed	1			1	GNAO1	ENSG00000087258		1		1
hsa-miR-107			Experimentally Observed	1			1	GNAQ	ENSG00000156052			1	1
hsa-miR-107			Experimentally Observed	1			1	GNL3	ENSG00000163938
hsa-miR-107			Experimentally Observed	1	1	35	1	GNS	ENSG00000135677		1		1
hsa-miR-107			Experimentally Observed	1			1	GOLIM4	ENSG00000173905		1
hsa-miR-107			Experimentally Observed	1	1	30	1	GOLT1B	ENSG00000111711		1	1	1
hsa-miR-107			Experimentally Observed	1	1	18	1	GORASP2	ENSG00000115806		1		1
hsa-miR-107			Experimentally Observed	1	1	13	1	GOT2	ENSG00000125166				1
hsa-miR-107			Experimentally Observed	1	1	13	1	GPAM	ENSG00000119927		1		1
hsa-miR-107			Experimentally Observed	1			1	GPC1	ENSG00000063660	1		1	1
hsa-miR-107			Experimentally Observed	1			1	GPI	ENSG00000282019
hsa-miR-107			Experimentally Observed	1	1	1	1	GPN1	ENSG00000198522		1	1
hsa-miR-107			Experimentally Observed	1			1	GPN2	ENSG00000142751		1
hsa-miR-107			Experimentally Observed	1			1	GPR25	ENSG00000170128
hsa-miR-107			Experimentally Observed	1			1	GPR88	ENSG00000181656				1
hsa-miR-107			Experimentally Observed	1	1	14	1	GPRC5A	ENSG00000013588
hsa-miR-107			Experimentally Observed	1			1	GPSM1	ENSG00000160360	1			1
hsa-miR-107			Experimentally Observed	1			1	GRHPR	ENSG00000137106
hsa-miR-107			Experimentally Observed	1			1	GRN	ENSG00000030582
hsa-miR-107			Experimentally Observed	1	1	1	1	GRSF1	ENSG00000132463				1
hsa-miR-107			Experimentally Observed	1	1	21	1	GSK3B	ENSG00000082701	1	1		1
hsa-miR-107			Experimentally Observed	1			1	GSN	ENSG00000148180
hsa-miR-107			Experimentally Observed	1			1	GTF2H4	ENSG00000213780
hsa-miR-107			Experimentally Observed	1			1	GTF2I	ENSG00000263001
hsa-miR-107			Experimentally Observed	1			1	GTF3C2	ENSG00000115207		1
hsa-miR-107			Experimentally Observed	1	1	5	1	GTPBP2	ENSG00000172432	1	1	1	1
hsa-miR-107			Experimentally Observed	1	1	4	1	GTSE1	ENSG00000075218
hsa-miR-107			Experimentally Observed	1	1	2	1	GUCD1	ENSG00000138867	1	1	1	1
hsa-miR-107			Experimentally Observed	1			1	GUCY1A2	ENSG00000152402
hsa-miR-107			Experimentally Observed	1			1	GUSB	ENSG00000169919
hsa-miR-107			Experimentally Observed	1	1	7	1	H2AFV	ENSG00000105968			1	1
hsa-miR-107			Experimentally Observed	1			1	HACE1	ENSG00000085382			1	1
hsa-miR-107			Experimentally Observed	1	1	5	1	HADH	ENSG00000138796
hsa-miR-107			Experimentally Observed	1			1	HADHA	ENSG00000084754
hsa-miR-107			Experimentally Observed	1	1	2	1	HAUS3	ENSG00000214367
hsa-miR-107			Experimentally Observed	1			1	HBP1	ENSG00000283847
hsa-miR-107			Experimentally Observed	1			1	HCCS	ENSG00000004961	1		1
hsa-miR-107			Experimentally Observed	1			1	HCN3	ENSG00000263324
hsa-miR-107			Experimentally Observed	1			1	HECTD1	ENSG00000092148	1	1	1
hsa-miR-107			Experimentally Observed	1	1	23	1	HECTD4	ENSG00000173064		1	1	1
hsa-miR-107			Experimentally Observed	1			1	HERC1	ENSG00000103657	1	1
hsa-miR-107			Experimentally Observed	1			1	HERC3	ENSG00000138641	1	1	1	1
hsa-miR-107			Experimentally Observed	1			1	HERPUD1	ENSG00000051108
hsa-miR-107			Experimentally Observed	1			1	HERPUD2	ENSG00000122557	1	1	1	1
hsa-miR-107			Experimentally Observed	1			1	HEY1	ENSG00000164683	1		1	1
hsa-miR-107			Experimentally Observed	1	1	4	1	HHIP	ENSG00000164161		1
hsa-miR-107			Experimentally Observed	1	1	18	1	HIBADH	ENSG00000106049
hsa-miR-107			Experimentally Observed	1			1	HIPK1	ENSG00000163349	1	1	1	1
hsa-miR-107			Experimentally Observed	1	1	44	1	HIPK2	ENSG00000064393	1	1
hsa-miR-107			Experimentally Observed	1			1	HIPK3	ENSG00000110422	1
hsa-miR-107			Experimentally Observed	1	1	8	1	HIRA	ENSG00000100084		1
hsa-miR-107			Experimentally Observed	1			1	HIST1H1C	ENSG00000187837
hsa-miR-107			Experimentally Observed	1			1	HIST1H1E	ENSG00000168298
hsa-miR-107			Experimentally Observed	1			1	HIST1H2AA	ENSG00000164508
hsa-miR-107			Experimentally Observed	1			1	HIST1H2AK	ENSG00000275221
hsa-miR-107			Experimentally Observed	1			1	HIST1H2BB	ENSG00000276410
hsa-miR-107			Experimentally Observed	1			1	HIST1H2BC	ENSG00000180596
hsa-miR-107			Experimentally Observed	1			1	HIST1H2BF	ENSG00000277224
hsa-miR-107			Experimentally Observed	1			1	HIST1H2BG	ENSG00000273802
hsa-miR-107			Experimentally Observed	1			1	HIST1H2BH	ENSG00000275713
hsa-miR-107			Experimentally Observed	1			1	HIST1H2BI	ENSG00000278588
hsa-miR-107			Experimentally Observed	1			1	HIST1H2BJ	ENSG00000124635
hsa-miR-107			Experimentally Observed	1			1	HIST1H2BL	ENSG00000185130
hsa-miR-107			Experimentally Observed	1			1	HIST1H2BN	ENSG00000233822
hsa-miR-107			Experimentally Observed	1			1	HIST1H2BO	ENSG00000274641
hsa-miR-107			Experimentally Observed	1			1	HIST1H3G	ENSG00000273983
hsa-miR-107			Experimentally Observed	1			1	HIST1H3J	ENSG00000197153
hsa-miR-107			Experimentally Observed	1			1	HIST1H4B	ENSG00000278705
hsa-miR-107			Experimentally Observed	1			1	HIST1H4F	ENSG00000274618
hsa-miR-107			Experimentally Observed	1			1	HIST2H2AC	ENSG00000184260
hsa-miR-107			Experimentally Observed	1			1	HIST3H2A	ENSG00000181218
hsa-miR-107			Experimentally Observed	1			1	HIST3H2BB	ENSG00000196890
hsa-miR-107			Experimentally Observed	1			1	HIVEP1	ENSG00000095951		1
hsa-miR-107			Experimentally Observed	1			1	HJURP	ENSG00000123485
hsa-miR-107			Experimentally Observed	1			1	HK1	ENSG00000156515		1		1
hsa-miR-107			Experimentally Observed	1	1	3	1	HLTF	ENSG00000071794		1		1
hsa-miR-107			Experimentally Observed	1			1	HMGCS1	ENSG00000112972	1	1		1
hsa-miR-107			Experimentally Observed	1			1	HNRNPA0	ENSG00000177733	1	1		1
hsa-miR-107			Experimentally Observed	1			1	HNRNPA1	ENSG00000135486
hsa-miR-107			Experimentally Observed	1	1	52	1	HNRNPA2B1	ENSG00000122566	1	1	1	1
hsa-miR-107			Experimentally Observed	1	1	9	1	HNRNPDL	ENSG00000152795		1	1	1
hsa-miR-107			Experimentally Observed	1			1	HNRNPH1	ENSG00000169045		1
hsa-miR-107			Experimentally Observed	1	1	20	1	HNRNPH3	ENSG00000096746
hsa-miR-107			Experimentally Observed	1			1	HNRNPLL	ENSG00000143889			1
hsa-miR-107			Experimentally Observed	1			1	HNRNPR	ENSG00000282958
hsa-miR-107			Experimentally Observed	1			1	HNRNPU	ENSG00000153187	1		1	1
hsa-miR-107			Experimentally Observed	1			1	HNRNPUL2	ENSG00000214753
hsa-miR-107			Experimentally Observed	1			1	HOXA13	ENSG00000106031
hsa-miR-107			Experimentally Observed	1			1	HOXA7	ENSG00000122592
hsa-miR-107			Experimentally Observed	1			1	HPS3	ENSG00000163755			1
hsa-miR-107			Experimentally Observed	1			1	HSP90AA1	ENSG00000080824
hsa-miR-107			Experimentally Observed	1			1	HSP90AB1	ENSG00000096384		1
hsa-miR-107			Experimentally Observed	1			1	HSPA1B	ENSG00000224501
hsa-miR-107			Experimentally Observed	1			1	HSPA4	ENSG00000170606
hsa-miR-107			Experimentally Observed	1			1	HSPA5	ENSG00000044574	1
hsa-miR-107			Experimentally Observed	1			1	HSPH1	ENSG00000120694		1
hsa-miR-107			Experimentally Observed	1			1	HTRA1	ENSG00000166033
hsa-miR-107			Experimentally Observed	1	1	14	1	HTT	ENSG00000197386	1	1		1
hsa-miR-107			Experimentally Observed	1			1	HYAL2	ENSG00000068001
hsa-miR-107			Experimentally Observed	1	1	11	1	ICMT	ENSG00000116237		1		1
hsa-miR-107			Experimentally Observed	1	1	5	1	IDH1	ENSG00000138413		1
hsa-miR-107			Experimentally Observed	1			1	IER3	ENSG00000237155
hsa-miR-107			Experimentally Observed	1			1	IER3IP1	ENSG00000134049
hsa-miR-107			Experimentally Observed	1			1	IER5L	ENSG00000188483
hsa-miR-107			Experimentally Observed	1			1	IFI30	ENSG00000216490
hsa-miR-107			Experimentally Observed	1			1	IFITM10	ENSG00000281618
hsa-miR-107			Experimentally Observed	1			1	IFNGR2	ENSG00000262795
hsa-miR-107			Experimentally Observed	1	1	2	1	IFNLR1	ENSG00000185436			1	1
hsa-miR-107			Experimentally Observed	1	1	5	1	IFRD1	ENSG00000006652		1		1
hsa-miR-107			Experimentally Observed	1	1	22	1	IFRD2	ENSG00000214706		1
hsa-miR-107			Experimentally Observed	1	1	26	1	IGF1R	ENSG00000140443	1	1
hsa-miR-107			Experimentally Observed	1			1	IGF2	ENSG00000167244				1
hsa-miR-107			Experimentally Observed	1	1	13	1	IGF2R	ENSG00000197081		1		1
hsa-miR-107			Experimentally Observed	1			1	IGFBP2	ENSG00000115457		1
hsa-miR-107			Experimentally Observed	1			1	IGFBP4	ENSG00000141753			1
hsa-miR-107			Experimentally Observed	1			1	IGFBP7	ENSG00000163453
hsa-miR-107			Experimentally Observed	1			1	IL24	ENSG00000162892
hsa-miR-107			Experimentally Observed	1	1	16	1	IL2RB	ENSG00000100385
hsa-miR-107			Experimentally Observed	1			1	IL6ST	ENSG00000134352		1		1
hsa-miR-107			Experimentally Observed	1	1	8	1	ILF3	ENSG00000129351	1	1	1	1
hsa-miR-107			Experimentally Observed	1	1	8	1	IMMT	ENSG00000132305
hsa-miR-107			Experimentally Observed	1			1	IMP3	ENSG00000177971
hsa-miR-107			Experimentally Observed	1	1	11	1	INCENP	ENSG00000149503			1	1
hsa-miR-107			Experimentally Observed	1	1	4	1	INF2	ENSG00000203485				1
hsa-miR-107			Experimentally Observed	1	1	8	1	ING3	ENSG00000071243		1	1	1
hsa-miR-107			Experimentally Observed	1			1	INPP4A	ENSG00000040933		1		1
hsa-miR-107			Experimentally Observed	1			1	INPP5E	ENSG00000148384
hsa-miR-107			Experimentally Observed	1	1	4	1	INPP5F	ENSG00000198825			1	1
hsa-miR-107			Experimentally Observed	1	1	5	1	INPPL1	ENSG00000165458		1		1
hsa-miR-107			Experimentally Observed	1	1	36	1	INSIG1	ENSG00000186480	1	1		1
hsa-miR-107			Experimentally Observed	1	1	2	1	INTS5	ENSG00000185085
hsa-miR-107			Experimentally Observed	1			1	INTS7	ENSG00000143493			1
hsa-miR-107			Experimentally Observed	1	1	15	1	IP6K1	ENSG00000176095		1		1
hsa-miR-107			Experimentally Observed	1			1	IPO13	ENSG00000117408
hsa-miR-107			Experimentally Observed	1			1	IPO5	ENSG00000065150		1	1	1
hsa-miR-107			Experimentally Observed	1	1	41	1	IPO7	ENSG00000205339	1	1	1	1
hsa-miR-107			Experimentally Observed	1	1	3	1	IPO8	ENSG00000133704	1	1	1	1
hsa-miR-107			Experimentally Observed	1	1	8	1	IPO9	ENSG00000198700	1	1
hsa-miR-107			Experimentally Observed	1			1	IPP	ENSG00000197429	1	1	1
hsa-miR-107			Experimentally Observed	1	1	32	1	IPPK	ENSG00000127080		1	1
hsa-miR-107			Experimentally Observed	1			1	IRAK1	ENSG00000184216				1
hsa-miR-107			Experimentally Observed	1	1	5	1	IRAK1BP1	ENSG00000146243
hsa-miR-107			Experimentally Observed	1	1	14	1	IRF1	ENSG00000125347		1	1	1
hsa-miR-107			Experimentally Observed	1	1	18	1	IRF4	ENSG00000137265
hsa-miR-107			Experimentally Observed	1	1	11	1	IRS1	ENSG00000169047	1	1	1	1
hsa-miR-107			Experimentally Observed	1	1	12	1	IRX3	ENSG00000177508
hsa-miR-107			Experimentally Observed	1			1	ISG20L2	ENSG00000143319	1	1	1
hsa-miR-107			Experimentally Observed	1	1	11	1	IST1	ENSG00000182149		1	1	1
hsa-miR-107			Experimentally Observed	1	1	2	1	ISY1	ENSG00000240682
hsa-miR-107			Experimentally Observed	1			1	ISYNA1	ENSG00000105655
hsa-miR-107			Experimentally Observed	1	1	15	1	ITGA2	ENSG00000164171	1	1	1	1
hsa-miR-107			Experimentally Observed	1	1	5	1	ITGA6	ENSG00000091409		1		1
hsa-miR-107			Experimentally Observed	1	1	13	1	ITPR1	ENSG00000150995		1		1
hsa-miR-107			Experimentally Observed	1			1	ITPR3	ENSG00000096433		1		1
hsa-miR-107			Experimentally Observed	1	1	21	1	ITPRIPL2	ENSG00000205730
hsa-miR-107			Experimentally Observed	1	1	38	1	JARID2	ENSG00000008083		1		1
hsa-miR-107			Experimentally Observed	1			1	JKAMP	ENSG00000050130
hsa-miR-107			Experimentally Observed	1	1	36	1	JOSD1	ENSG00000100221		1		1
hsa-miR-107			Experimentally Observed	1			1	JOSD2	ENSG00000161677
hsa-miR-107			Experimentally Observed	1			1	JUN	ENSG00000177606	1	1	1	1
hsa-miR-107			Experimentally Observed	1	1	12	1	KARS	ENSG00000065427
hsa-miR-107			Experimentally Observed	1	1	15	1	KAT6A	ENSG00000083168	1	1	1	1
hsa-miR-107			Experimentally Observed	1			1	KAT6B	ENSG00000281813
hsa-miR-107			Experimentally Observed	1	1	21	1	KATNAL1	ENSG00000102781		1	1	1
hsa-miR-107			Experimentally Observed	1	1	3	1	KAZN	ENSG00000189337	1	1		1
hsa-miR-107			Experimentally Observed	1	1	27	1	KBTBD2	ENSG00000170852
hsa-miR-107			Experimentally Observed	1			1	KCNC2	ENSG00000166006	1	1
hsa-miR-107			Experimentally Observed	1	1	7	1	KCNC4	ENSG00000116396	1	1	1	1
hsa-miR-107			Experimentally Observed	1			1	KCNK3	ENSG00000171303		1		1
hsa-miR-107			Experimentally Observed	1			1	KCTD10	ENSG00000110906		1		1
hsa-miR-107			Experimentally Observed	1	1	10	1	KCTD12	ENSG00000178695
hsa-miR-107			Experimentally Observed	1	1	15	1	KCTD15	ENSG00000153885	1	1	1	1
hsa-miR-107			Experimentally Observed	1			1	KCTD16	ENSG00000183775	1	1	1	1
hsa-miR-107			Experimentally Observed	1			1	KCTD20	ENSG00000112078			1	1
hsa-miR-107			Experimentally Observed	1			1	KCTD5	ENSG00000167977				1
hsa-miR-107			Experimentally Observed	1			1	KDELR2	ENSG00000136240
hsa-miR-107			Experimentally Observed	1			1	KDM2A	ENSG00000173120		1	1	1
hsa-miR-107			Experimentally Observed	1	1	1	1	KDM5A	ENSG00000073614	1		1	1
hsa-miR-107			Experimentally Observed	1	1	12	1	KDM5B	ENSG00000117139		1	1	1
hsa-miR-107			Experimentally Observed	1			1	KDM5C	ENSG00000126012	1	1	1
hsa-miR-107			Experimentally Observed	1	1	3	1	KDM6A	ENSG00000147050	1		1
hsa-miR-107			Experimentally Observed	1	1	8	1	KHNYN	ENSG00000100441		1		1
hsa-miR-107			Experimentally Observed	1			1	KHSRP	ENSG00000088247
hsa-miR-107			Experimentally Observed	1	1	34	1	KIAA0895	ENSG00000164542	1			1
hsa-miR-107			Experimentally Observed	1			1	KIF14	ENSG00000118193
hsa-miR-107			Experimentally Observed	1	1	21	1	KIF1B	ENSG00000054523		1	1	1
hsa-miR-107			Experimentally Observed	1	1	9	1	KIF1C	ENSG00000129250		1
hsa-miR-107			Experimentally Observed	1	1	44	1	KIF5B	ENSG00000170759	1	1	1	1
hsa-miR-107			Experimentally Observed	1			1	KIFAP3	ENSG00000075945
hsa-miR-107			Experimentally Observed	1			1	KIFC1	ENSG00000237649
hsa-miR-107			Experimentally Observed	1	1	1	1	KIFC3	ENSG00000140859				1
hsa-miR-107			Experimentally Observed	1	1	11	1	KLF4	ENSG00000136826	1	1		1
hsa-miR-107			Experimentally Observed	1			1	KLF5	ENSG00000102554		1
hsa-miR-107			Experimentally Observed	1			1	KLF6	ENSG00000067082				1
hsa-miR-107			Experimentally Observed	1	1	4	1	KLHDC3	ENSG00000124702	1	1
hsa-miR-107			Experimentally Observed	1			1	KLHL1	ENSG00000150361		1		1
hsa-miR-107			Experimentally Observed	1	1	47	1	KLHL15	ENSG00000174010		1		1
hsa-miR-107			Experimentally Observed	1	1	20	1	KLHL18	ENSG00000114648	1	1	1	1
hsa-miR-107			Experimentally Observed	1			1	KLHL21	ENSG00000162413
hsa-miR-107			Experimentally Observed	1			1	KLHL28	ENSG00000179454	1	1	1	1
hsa-miR-107			Experimentally Observed	1			1	KLHL36	ENSG00000135686
hsa-miR-107			Experimentally Observed	1			1	KLHL9	ENSG00000198642	1	1	1	1
hsa-miR-107			Experimentally Observed	1			1	KMT2A	ENSG00000118058	1	1	1	1
hsa-miR-107			Experimentally Observed	1	1	40	1	KMT2D	ENSG00000167548	1	1		1
hsa-miR-107			Experimentally Observed	1			1	KMT2E	ENSG00000005483		1
hsa-miR-107			Experimentally Observed	1	1	36	1	KPNA1	ENSG00000114030		1	1	1
hsa-miR-107			Experimentally Observed	1	1	9	1	KPNA4	ENSG00000186432	1	1	1	1
hsa-miR-107			Experimentally Observed	1	1	10	1	KPNA6	ENSG00000025800	1	1		1
hsa-miR-107			Experimentally Observed	1			1	KRT18	ENSG00000111057
hsa-miR-107			Experimentally Observed	1			1	KTN1	ENSG00000126777
hsa-miR-107			Experimentally Observed	1	1	22	1	LAMC1	ENSG00000135862		1	1	1
hsa-miR-107			Experimentally Observed	1	1	20	1	LAMTOR3	ENSG00000109270	1	1	1	1
hsa-miR-107			Experimentally Observed	1	1	28	1	LARP1	ENSG00000155506
hsa-miR-107			Experimentally Observed	1	1	3	1	LARP4	ENSG00000161813	1	1	1	1
hsa-miR-107			Experimentally Observed	1	1	51	1	LATS1	ENSG00000131023		1	1	1
hsa-miR-107			Experimentally Observed	1			1	LEMD3	ENSG00000174106			1	1
hsa-miR-107			Experimentally Observed	1			1	LETM1	ENSG00000168924				1
hsa-miR-107			Experimentally Observed	1			1	LIFR	ENSG00000113594		1		1
hsa-miR-107			Experimentally Observed	1	1	1	1	LIMD2	ENSG00000136490	1	1		1
hsa-miR-107			Experimentally Observed	1	1	3	1	LIN7A	ENSG00000111052	1
hsa-miR-107			Experimentally Observed	1	1	34	1	LITAF	ENSG00000189067		1		1
hsa-miR-107			Experimentally Observed	1			1	LMO4	ENSG00000143013	1	1	1	1
hsa-miR-107			Experimentally Observed	1	1	22	1	LMTK2	ENSG00000164715
hsa-miR-107			Experimentally Observed	1			1	LOXL2	ENSG00000134013	1		1	1
hsa-miR-107			Experimentally Observed	1	1	5	1	LOXL4	ENSG00000138131	1	1	1	1
hsa-miR-107			Experimentally Observed	1			1	LPCAT1	ENSG00000275079
hsa-miR-107			Experimentally Observed	1	1	9	1	LRIF1	ENSG00000121931
hsa-miR-107			Experimentally Observed	1			1	LRIG1	ENSG00000282243
hsa-miR-107			Experimentally Observed	1			1	LRP10	ENSG00000197324		1
hsa-miR-107			Experimentally Observed	1			1	LRP11	ENSG00000120256		1	1	1
hsa-miR-107			Experimentally Observed	1			1	LRP5	ENSG00000162337
hsa-miR-107			Experimentally Observed	1	1	18	1	LRPPRC	ENSG00000138095				1
hsa-miR-107			Experimentally Observed	1			1	LRRC41	ENSG00000132128
hsa-miR-107			Experimentally Observed	1			1	LRRC4B	ENSG00000131409
hsa-miR-107			Experimentally Observed	1			1	LRRC58	ENSG00000163428		1		1
hsa-miR-107			Experimentally Observed	1	1	7	1	LRRC59	ENSG00000108829		1	1
hsa-miR-107			Experimentally Observed	1			1	LRRC7	ENSG00000033122		1	1
hsa-miR-107			Experimentally Observed	1			1	LRRC8A	ENSG00000136802		1	1	1
hsa-miR-107			Experimentally Observed	1	1	2	1	LRSAM1	ENSG00000148356				1
hsa-miR-107			Experimentally Observed	1	1	29	1	LSM11	ENSG00000155858		1	1
hsa-miR-107			Experimentally Observed	1	1	9	1	LTBP3	ENSG00000168056		1
[truncated: 32,729 more rows]

## Sheet: 21novel_miRNAs vs targets
miRNA_ID	miRDB_TargetScore	Gene_Symbol	ENSG_ID	Targets of downregulated miRNAs identified by Wu et al. (conserved; 1: yes)	Targets of upregulated miRNAs identified by Wu et al. (conserved; 1: yes)	Targets of downregulated miRNAs identified by Wu et al. (strongest; 1: yes)	Targets of upregulated miRNAs identified by Wu et al. (strongest; 1: yes)
hsa_can_1002-m	100	VLDLR	ENSG00000147852	1	1	1	1
hsa_can_1002-m	98	NOVA1	ENSG00000139910	1	1	1	1
hsa_can_1002-m	98	SLC41A1	ENSG00000133065	1	1	1	1
hsa_can_1002-m	98	CNTN1	ENSG00000018236			1
hsa_can_1002-m	98	LHX4	ENSG00000121454	1
hsa_can_1002-m	96	VPS26B	ENSG00000151502	1		1	1
hsa_can_1002-m	95	FAM167A	ENSG00000154319	1	1	1	1
hsa_can_1002-m	93	NHS	ENSG00000188158	1	1	1	1
hsa_can_1002-m	92	MFAP3	ENSG00000037749			1	1
hsa_can_1002-m	92	AKAP9	ENSG00000127914		1
hsa_can_1002-m	92	PTPN9	ENSG00000169410	1		1	1
hsa_can_1002-m	89	PCSK5	ENSG00000099139	1		1	1
hsa_can_1002-m	87	DLX5	ENSG00000105880	1
hsa_can_1002-m	87	RIMS2	ENSG00000176406	1	1	1	1
hsa_can_1002-m	85	CMIP	ENSG00000153815	1	1	1	1
hsa_can_1002-m	84	ABHD2	ENSG00000140526	1	1
hsa_can_1002-m	83	CSF2RB	ENSG00000100368	1		1	1
hsa_can_1002-m	83	NSFL1C	ENSG00000088833	1	1	1	1
hsa_can_1002-m	83	PPP1R3B	ENSG00000173281		1	1	1
hsa_can_1002-m	83	TGIF1	ENSG00000177426	1
hsa_can_1002-m	82	C5AR1	ENSG00000197405			1
hsa_can_1002-m	82	BRWD3	ENSG00000165288	1	1	1	1
hsa_can_1002-m	81	WASHC5	ENSG00000164961	1		1
hsa_can_1155-m	100	PPM1A	ENSG00000100614	1	1	1	1
hsa_can_1155-m	100	PEX13	ENSG00000162928	1	1	1	1
hsa_can_1155-m	100	MICU3	ENSG00000155970			1
hsa_can_1155-m	100	SRPK2	ENSG00000135250		1	1	1
hsa_can_1155-m	100	ANKRD28	ENSG00000206560		1	1	1
hsa_can_1155-m	100	USP9X	ENSG00000124486		1		1
hsa_can_1155-m	100	KAT6A	ENSG00000083168	1	1	1	1
hsa_can_1155-m	99	SYNCRIP	ENSG00000135316		1	1	1
hsa_can_1155-m	99	CREG2	ENSG00000175874	1	1	1	1
hsa_can_1155-m	99	BCLAF1	ENSG00000029363				1
hsa_can_1155-m	99	SYT4	ENSG00000132872		1	1	1
hsa_can_1155-m	99	ARHGAP5	ENSG00000100852	1	1	1	1
hsa_can_1155-m	99	FAM126B	ENSG00000155744	1	1	1	1
hsa_can_1155-m	99	ZNF652	ENSG00000198740		1	1	1
hsa_can_1155-m	99	GCNT1	ENSG00000187210	1		1	1
hsa_can_1155-m	99	TMEM161B	ENSG00000164180		1
hsa_can_1155-m	99	LARP4	ENSG00000161813	1	1	1	1
hsa_can_1155-m	99	TMEM47	ENSG00000147027	1	1	1	1
hsa_can_1155-m	98	CACNB4	ENSG00000182389	1	1	1	1
hsa_can_1155-m	98	PPP6C	ENSG00000119414	1	1	1	1
hsa_can_1155-m	98	DLG3	ENSG00000082458	1		1	1
hsa_can_1155-m	98	ZBTB41	ENSG00000177888		1	1	1
hsa_can_1155-m	98	EXOC5	ENSG00000070367		1		1
hsa_can_1155-m	98	ZNF367	ENSG00000165244		1		1
hsa_can_1155-m	98	LRRC58	ENSG00000163428		1		1
hsa_can_1155-m	97	NR4A3	ENSG00000119508	1	1	1	1
hsa_can_1155-m	97	COMT	ENSG00000093010		1
hsa_can_1155-m	97	KCNK2	ENSG00000082482		1	1	1
hsa_can_1155-m	97	TMEM106B	ENSG00000106460		1		1
hsa_can_1155-m	97	RHOBTB3	ENSG00000164292		1	1	1
hsa_can_1155-m	97	VEGFA	ENSG00000112715	1	1	1	1
hsa_can_1155-m	97	CPSF6	ENSG00000111605	1	1	1	1
hsa_can_1155-m	97	KLHDC10	ENSG00000128607		1		1
hsa_can_1155-m	97	OPA1	ENSG00000198836		1	1	1
hsa_can_1155-m	97	AGFG1	ENSG00000173744		1		1
hsa_can_1155-m	97	KLHL28	ENSG00000179454	1	1	1	1
hsa_can_1155-m	97	CHD6	ENSG00000124177	1	1	1	1
hsa_can_1155-m	97	KLF15	ENSG00000163884		1	1	1
hsa_can_1155-m	96	CREBZF	ENSG00000137504		1		1
hsa_can_1155-m	96	APPL1	ENSG00000157500	1	1	1	1
hsa_can_1155-m	96	ROBO2	ENSG00000185008	1	1	1	1
hsa_can_1155-m	96	RIOK3	ENSG00000101782	1	1	1	1
hsa_can_1155-m	96	RAB27B	ENSG00000041353				1
hsa_can_1155-m	96	ZDHHC21	ENSG00000175893		1	1	1
hsa_can_1155-m	96	ACAP2	ENSG00000114331	1	1	1	1
hsa_can_1155-m	95	STK39	ENSG00000198648	1	1	1
hsa_can_1155-m	95	SUCO	ENSG00000094975	1	1	1	1
hsa_can_1155-m	95	SLC35F5	ENSG00000115084		1		1
hsa_can_1155-m	95	PRKAA1	ENSG00000132356	1	1		1
hsa_can_1155-m	95	ENOPH1	ENSG00000145293		1
hsa_can_1155-m	95	NR3C1	ENSG00000113580			1	1
hsa_can_1155-m	95	ARFGEF1	ENSG00000066777		1		1
hsa_can_1155-m	95	PHTF2	ENSG00000006576	1	1	1	1
hsa_can_1155-m	94	NRIP1	ENSG00000180530	1	1	1	1
hsa_can_1155-m	94	NAALADL2	ENSG00000177694	1		1	1
hsa_can_1155-m	94	POC1B	ENSG00000139323	1		1
hsa_can_1155-m	94	PCDH18	ENSG00000189184	1	1	1	1
hsa_can_1155-m	94	EIF4A2	ENSG00000156976		1
hsa_can_1155-m	94	ADAM10	ENSG00000137845	1	1	1	1
hsa_can_1155-m	94	ZBTB44	ENSG00000196323		1		1
hsa_can_1155-m	94	MPDZ	ENSG00000107186	1	1	1	1
hsa_can_1155-m	94	NRP1	ENSG00000099250	1	1	1	1
hsa_can_1155-m	94	CERK	ENSG00000100422			1	1
hsa_can_1155-m	94	SNX4	ENSG00000114520	1	1		1
hsa_can_1155-m	93	SCAI	ENSG00000173611		1		1
hsa_can_1155-m	93	TET1	ENSG00000138336	1	1	1	1
hsa_can_1155-m	93	TRIM23	ENSG00000113595		1
hsa_can_1155-m	93	PABPC4L	ENSG00000254535		1		1
hsa_can_1155-m	93	ETNK1	ENSG00000139163		1		1
hsa_can_1155-m	93	LMBR1	ENSG00000105983			1	1
hsa_can_1155-m	93	ZFP36L1	ENSG00000185650		1	1	1
hsa_can_1155-m	93	MARCH5	ENSG00000198060		1		1
hsa_can_1155-m	93	PIP5K1B	ENSG00000107242	1	1		1
hsa_can_1155-m	92	ADARB1	ENSG00000197381			1
hsa_can_1155-m	92	DGAT2	ENSG00000062282			1
hsa_can_1155-m	92	ME2	ENSG00000082212	1			1
hsa_can_1155-m	92	GCFC2	ENSG00000005436			1	1
hsa_can_1155-m	92	RPS6KB1	ENSG00000108443	1	1	1	1
hsa_can_1155-m	92	STEAP2	ENSG00000157214	1		1	1
hsa_can_1155-m	92	DENND5B	ENSG00000170456		1		1
hsa_can_1155-m	92	CCDC148	ENSG00000153237		1		1
hsa_can_1155-m	91	ITGAV	ENSG00000138448		1		1
hsa_can_1155-m	91	USP15	ENSG00000135655		1		1
hsa_can_1155-m	91	CROT	ENSG00000005469		1
hsa_can_1155-m	91	KLHL9	ENSG00000198642	1	1	1	1
hsa_can_1155-m	91	AFF4	ENSG00000072364	1	1	1	1
hsa_can_1155-m	91	LHX2	ENSG00000106689		1
hsa_can_1155-m	91	BTG1	ENSG00000133639	1	1	1	1
hsa_can_1155-m	91	SH3RF1	ENSG00000154447			1	1
hsa_can_1155-m	90	TENM1	ENSG00000009694		1		1
hsa_can_1155-m	90	ABHD2	ENSG00000140526	1	1
hsa_can_1155-m	90	RNMT	ENSG00000101654		1	1	1
hsa_can_1155-m	90	ZMYND11	ENSG00000015171		1	1	1
hsa_can_1155-m	90	VGLL4	ENSG00000144560	1	1	1	1
hsa_can_1155-m	90	TMEM30A	ENSG00000112697			1	1
hsa_can_1155-m	90	KCNQ3	ENSG00000184156	1	1		1
hsa_can_1155-m	90	TFAM	ENSG00000108064		1		1
hsa_can_1155-m	90	RBFOX1	ENSG00000078328	1	1	1	1
hsa_can_1155-m	90	ATP8A1	ENSG00000124406		1		1
hsa_can_1155-m	90	FAF2	ENSG00000113194	1	1	1	1
hsa_can_1155-m	90	ZFC3H1	ENSG00000133858	1	1		1
hsa_can_1155-m	90	ADGRG6	ENSG00000112414				1
hsa_can_1155-m	89	CPD	ENSG00000108582		1	1	1
hsa_can_1155-m	89	TM9SF3	ENSG00000077147	1	1	1	1
hsa_can_1155-m	89	PRLR	ENSG00000113494	1	1		1
hsa_can_1155-m	89	PLCB3	ENSG00000149782				1
hsa_can_1155-m	89	LATS1	ENSG00000131023		1	1	1
hsa_can_1155-m	89	USP34	ENSG00000115464		1		1
hsa_can_1155-m	89	ZC3H6	ENSG00000188177		1		1
hsa_can_1155-m	89	SAMD8	ENSG00000156671	1		1	1
hsa_can_1155-m	88	FGF9	ENSG00000102678	1	1	1	1
hsa_can_1155-m	88	BHLHE41	ENSG00000123095	1	1		1
hsa_can_1155-m	88	SEC24A	ENSG00000113615		1	1	1
hsa_can_1155-m	88	ROCK1	ENSG00000067900		1		1
hsa_can_1155-m	88	CCDC88A	ENSG00000115355	1	1	1	1
hsa_can_1155-m	88	ANKRD17	ENSG00000132466		1	1	1
hsa_can_1155-m	88	ZNF518B	ENSG00000178163		1	1	1
hsa_can_1155-m	88	TRPM7	ENSG00000092439			1
hsa_can_1155-m	88	RAVER2	ENSG00000162437	1	1	1	1
hsa_can_1155-m	88	RALA	ENSG00000006451	1			1
hsa_can_1155-m	88	SYT11	ENSG00000132718	1	1	1	1
hsa_can_1155-m	88	ZMYM2	ENSG00000121741		1		1
hsa_can_1155-m	87	IDE	ENSG00000119912	1		1	1
hsa_can_1155-m	87	BAG4	ENSG00000156735	1	1		1
hsa_can_1155-m	87	C5orf30	ENSG00000181751	1	1		1
hsa_can_1155-m	87	NHS	ENSG00000188158	1	1	1	1
hsa_can_1155-m	87	ITPR2	ENSG00000123104	1	1	1	1
hsa_can_1155-m	87	HERC1	ENSG00000103657	1	1
hsa_can_1155-m	87	NXPE3	ENSG00000144815		1	1
hsa_can_1155-m	87	SMURF2	ENSG00000108854		1		1
hsa_can_1155-m	87	AKIRIN1	ENSG00000174574	1	1	1	1
hsa_can_1155-m	87	SCAF11	ENSG00000139218	1	1	1	1
hsa_can_1155-m	87	TMEM33	ENSG00000109133	1	1		1
hsa_can_1155-m	87	HIPK3	ENSG00000110422	1
hsa_can_1155-m	87	FUT9	ENSG00000172461	1	1	1	1
hsa_can_1155-m	87	FCHSD2	ENSG00000137478		1		1
hsa_can_1155-m	86	FNIP1	ENSG00000217128			1	1
hsa_can_1155-m	86	UBA6	ENSG00000033178	1		1	1
hsa_can_1155-m	86	DEK	ENSG00000124795		1		1
hsa_can_1155-m	86	BMP2K	ENSG00000138756		1		1
hsa_can_1155-m	86	FAM98A	ENSG00000119812		1
hsa_can_1155-m	86	TBX18	ENSG00000112837		1		1
hsa_can_1155-m	86	ZKSCAN8	ENSG00000198315	1	1	1	1
hsa_can_1155-m	86	PSME3	ENSG00000131467	1	1	1	1
hsa_can_1155-m	86	ZNF638	ENSG00000075292		1
hsa_can_1155-m	85	ZBTB11	ENSG00000066422		1	1
hsa_can_1155-m	85	BNIP3L	ENSG00000104765		1		1
hsa_can_1155-m	85	CD109	ENSG00000156535	1	1	1	1
hsa_can_1155-m	85	XRN1	ENSG00000114127		1	1	1
hsa_can_1155-m	85	PSD2	ENSG00000146005		1		1
hsa_can_1155-m	85	KCNB1	ENSG00000158445		1		1
hsa_can_1155-m	84	LRRC8B	ENSG00000197147	1	1	1	1
hsa_can_1155-m	84	GLUD1	ENSG00000148672	1	1	1	1
hsa_can_1155-m	84	REEP3	ENSG00000165476	1	1	1	1
hsa_can_1155-m	84	ITGBL1	ENSG00000198542	1	1	1	1
hsa_can_1155-m	84	SREK1IP1	ENSG00000153006	1	1	1	1
hsa_can_1155-m	84	ASXL2	ENSG00000143970		1		1
hsa_can_1155-m	84	ATE1	ENSG00000107669			1
hsa_can_1155-m	83	TCF12	ENSG00000140262	1	1		1
hsa_can_1155-m	83	RUFY3	ENSG00000018189		1	1	1
hsa_can_1155-m	83	MAP1B	ENSG00000131711		1	1	1
hsa_can_1155-m	83	C4orf33	ENSG00000151470			1
hsa_can_1155-m	82	SPAG9	ENSG00000008294		1		1
hsa_can_1155-m	82	FZD3	ENSG00000104290	1	1	1	1
hsa_can_1155-m	82	LIN54	ENSG00000189308		1		1
hsa_can_1155-m	82	ZNF516	ENSG00000101493	1		1	1
hsa_can_1155-m	82	FSD1L	ENSG00000106701			1	1
hsa_can_1155-m	82	SMARCA1	ENSG00000102038		1
hsa_can_1155-m	82	ANKRD12	ENSG00000101745		1		1
hsa_can_1155-m	82	ST6GAL1	ENSG00000073849	1		1	1
hsa_can_1155-m	81	ABL2	ENSG00000143322		1	1	1
hsa_can_1155-m	81	SMIM14	ENSG00000163683		1	1	1
hsa_can_1155-m	81	C11orf58	ENSG00000110696	1		1	1
hsa_can_1155-m	81	BMPR2	ENSG00000204217	1	1	1	1
hsa_can_1155-m	81	SNX2	ENSG00000205302		1
hsa_can_1155-m	81	ADGRL1	ENSG00000072071		1
hsa_can_1155-m	81	ITGB8	ENSG00000105855	1	1	1	1
hsa_can_1155-m	81	PPARG	ENSG00000132170	1
hsa_can_1155-m	81	CERKL	ENSG00000188452		1	1	1
hsa_can_1155-m	81	GALNT7	ENSG00000109586	1	1	1	1
hsa_can_1155-m	81	NECAB1	ENSG00000123119	1			1
hsa_can_1155-m	81	KLF12	ENSG00000118922	1	1
hsa_can_1155-m	81	MATR3	ENSG00000015479		1	1	1
hsa_can_1155-m	81	OARD1	ENSG00000124596	1
hsa_can_1155-m	81	DAZAP1	ENSG00000071626	1	1	1
hsa_can_1155-m	81	MCTP2	ENSG00000140563				1
hsa_can_1727-m	98	MARCH1	ENSG00000145416	1		1	1
hsa_can_1727-m	98	SOS1	ENSG00000115904	1	1	1	1
hsa_can_1727-m	98	ZNF711	ENSG00000147180	1		1
hsa_can_1727-m	98	LRCH2	ENSG00000130224	1		1	1
hsa_can_1727-m	97	EYA4	ENSG00000112319	1	1	1	1
hsa_can_1727-m	97	ABL2	ENSG00000143322		1	1	1
hsa_can_1727-m	96	EDA	ENSG00000158813	1	1	1	1
hsa_can_1727-m	96	ITGA9	ENSG00000144668	1		1
hsa_can_1727-m	96	MYRF	ENSG00000124920	1	1	1	1
hsa_can_1727-m	95	TMCC1	ENSG00000172765	1	1	1	1
hsa_can_1727-m	95	ANKRD13C	ENSG00000118454	1	1	1	1
hsa_can_1727-m	94	FXYD6	ENSG00000137726			1
hsa_can_1727-m	94	ELAVL1	ENSG00000066044	1	1
hsa_can_1727-m	93	CHIC1	ENSG00000204116	1	1	1	1
hsa_can_1727-m	93	TRPS1	ENSG00000104447	1	1	1	1
hsa_can_1727-m	93	CD164	ENSG00000135535	1	1		1
hsa_can_1727-m	93	TBL1XR1	ENSG00000177565	1	1	1	1
hsa_can_1727-m	93	SLC25A25	ENSG00000148339	1	1	1	1
hsa_can_1727-m	93	BASP1	ENSG00000176788	1	1	1
hsa_can_1727-m	92	FMR1	ENSG00000102081	1	1		1
hsa_can_1727-m	91	KCNT1	ENSG00000107147			1	1
hsa_can_1727-m	91	HNRNPA3	ENSG00000170144		1		1
hsa_can_1727-m	90	TMEM184B	ENSG00000198792	1	1		1
hsa_can_1727-m	90	RREB1	ENSG00000124782	1	1	1	1
hsa_can_1727-m	90	SNX13	ENSG00000071189	1	1	1	1
hsa_can_1727-m	90	TPD52	ENSG00000076554		1	1	1
hsa_can_1727-m	90	GABRB3	ENSG00000166206	1		1	1
hsa_can_1727-m	89	FAM53A	ENSG00000174137			1	1
hsa_can_1727-m	89	ABRAXAS2	ENSG00000165660	1	1	1	1
hsa_can_1727-m	89	HECTD2	ENSG00000165338		1	1	1
hsa_can_1727-m	88	ADCYAP1	ENSG00000141433	1	1	1	1
hsa_can_1727-m	88	FUBP1	ENSG00000162613	1	1	1
hsa_can_1727-m	87	MTMR12	ENSG00000150712	1	1	1	1
hsa_can_1727-m	87	HTT	ENSG00000197386	1	1		1
hsa_can_1727-m	86	SLC7A6	ENSG00000103064	1		1	1
hsa_can_1727-m	86	PAFAH1B1	ENSG00000007168	1	1	1	1
hsa_can_1727-m	86	GPR160	ENSG00000173890	1		1
hsa_can_1727-m	85	FAM131B	ENSG00000159784		1		1
hsa_can_1727-m	85	FBXL2	ENSG00000153558	1		1
hsa_can_1727-m	85	SMARCA4	ENSG00000127616	1	1	1
hsa_can_1727-m	84	PPP2R5E	ENSG00000154001	1	1		1
hsa_can_1727-m	84	SEL1L3	ENSG00000091490	1	1	1	1
hsa_can_1727-m	84	EGR2	ENSG00000122877	1	1	1	1
hsa_can_1727-m	84	CNOT2	ENSG00000111596	1	1	1
hsa_can_1727-m	84	RAP1A	ENSG00000116473	1	1		1
hsa_can_1727-m	84	CAMK2G	ENSG00000148660	1	1	1
hsa_can_1727-m	83	GAN	ENSG00000261609	1	1	1	1
hsa_can_1727-m	83	SLC19A3	ENSG00000135917	1	1	1	1
hsa_can_1727-m	83	C1orf52	ENSG00000162642	1		1	1
hsa_can_1727-m	82	MAP3K1	ENSG00000095015	1	1	1	1
hsa_can_1727-m	82	RAG1	ENSG00000166349	1		1	1
hsa_can_1727-m	82	GNB1	ENSG00000078369	1	1	1	1
hsa_can_1727-m	81	XRCC3	ENSG00000126215			1
hsa_can_1727-m	81	CHD1	ENSG00000153922	1	1	1
hsa_can_1727-m	81	SLCO3A1	ENSG00000176463	1	1	1	1
hsa_can_2071-m	84	CDYL	ENSG00000153046		1		1
hsa_can_2434-m	95	ARMCX3	ENSG00000102401		1		1
hsa_can_2434-m	95	AHCTF1	ENSG00000153207	1	1	1
hsa_can_2434-m	95	TMEM65	ENSG00000164983	1		1	1
hsa_can_2434-m	93	ZBTB47	ENSG00000114853		1		1
hsa_can_2434-m	93	DLG2	ENSG00000150672		1		1
hsa_can_2434-m	93	SLC1A2	ENSG00000110436		1	1	1
hsa_can_2434-m	92	RBFOX1	ENSG00000078328	1	1	1	1
hsa_can_2434-m	92	HIPK1	ENSG00000163349	1	1	1	1
hsa_can_2434-m	90	RFX3	ENSG00000080298			1
hsa_can_2434-m	90	NUP153	ENSG00000124789		1
hsa_can_2434-m	89	ARMCX2	ENSG00000184867		1		1
hsa_can_2434-m	89	EIF3A	ENSG00000107581		1
hsa_can_2434-m	88	APLP2	ENSG00000084234	1		1
hsa_can_2434-m	88	CDC25A	ENSG00000164045	1	1	1	1
hsa_can_2434-m	88	UBR1	ENSG00000159459	1	1	1	1
hsa_can_2434-m	87	USP16	ENSG00000156256		1
hsa_can_2434-m	86	CNTNAP4	ENSG00000152910	1
hsa_can_2434-m	84	CYYR1	ENSG00000166265		1	1	1
hsa_can_2434-m	84	MTMR7	ENSG00000003987	1		1	1
hsa_can_2434-m	84	MARCH1	ENSG00000145416	1		1	1
hsa_can_2434-m	81	WAPL	ENSG00000062650	1	1		1
hsa_can_2434-m	81	AGPAT5	ENSG00000155189		1	1	1
hsa_can_2434-m	81	LPL	ENSG00000175445	1		1
hsa_can_575-m	99	UBXN2B	ENSG00000215114	1	1	1	1
hsa_can_575-m	99	VDAC3	ENSG00000078668	1		1
hsa_can_575-m	99	SLITRK4	ENSG00000179542	1	1	1	1
hsa_can_575-m	99	RB1	ENSG00000139687	1	1	1	1
hsa_can_575-m	98	LSM12	ENSG00000161654	1	1	1	1
hsa_can_575-m	98	SETD7	ENSG00000145391	1	1	1
hsa_can_575-m	98	FLYWCH1	ENSG00000059122	1		1	1
hsa_can_575-m	97	GPBP1	ENSG00000062194	1	1	1	1
hsa_can_575-m	97	CREBRF	ENSG00000164463		1		1
hsa_can_575-m	97	CA10	ENSG00000154975		1	1	1
hsa_can_575-m	97	FBXL7	ENSG00000183580	1		1	1
hsa_can_575-m	96	ULK2	ENSG00000083290	1	1	1
hsa_can_575-m	96	UBE2D1	ENSG00000072401	1	1
hsa_can_575-m	96	MME	ENSG00000196549	1		1	1
hsa_can_575-m	96	AMOT	ENSG00000126016	1	1	1	1
hsa_can_575-m	95	UBE2D3	ENSG00000109332	1	1	1	1
hsa_can_575-m	95	GNPTAB	ENSG00000111670			1	1
hsa_can_575-m	95	DEDD	ENSG00000158796	1	1	1	1
hsa_can_575-m	94	KLHL14	ENSG00000197705	1	1	1	1
hsa_can_575-m	94	C10orf90	ENSG00000154493			1
hsa_can_575-m	93	PGM2L1	ENSG00000165434	1	1	1	1
hsa_can_575-m	93	TET1	ENSG00000138336	1	1	1	1
hsa_can_575-m	93	CUL2	ENSG00000108094	1	1	1	1
hsa_can_575-m	92	MYLK	ENSG00000065534	1	1	1	1
hsa_can_575-m	92	PCDHGA1	ENSG00000204956	1	1	1	1
hsa_can_575-m	92	RAB5B	ENSG00000111540	1	1	1	1
hsa_can_575-m	91	TMEM168	ENSG00000146802	1	1	1	1
hsa_can_575-m	91	CAPN2	ENSG00000162909	1		1
hsa_can_575-m	91	OGT	ENSG00000147162	1	1	1	1
hsa_can_575-m	91	NFYA	ENSG00000001167	1		1
hsa_can_575-m	91	PKN2	ENSG00000065243		1	1	1
hsa_can_575-m	90	SLC30A6	ENSG00000152683	1		1	1
hsa_can_575-m	89	ADO	ENSG00000181915	1	1	1	1
hsa_can_575-m	89	RUNX1	ENSG00000159216	1	1	1	1
hsa_can_575-m	89	C3orf38	ENSG00000179021	1	1		1
hsa_can_575-m	89	ARHGEF33	ENSG00000214694	1		1
hsa_can_575-m	88	LZTS3	ENSG00000088899		1	1	1
hsa_can_575-m	88	PPT1	ENSG00000131238	1	1	1	1
hsa_can_575-m	88	ZNF644	ENSG00000122482	1	1	1
hsa_can_575-m	88	MAP2K7	ENSG00000076984				1
hsa_can_575-m	87	RSPO3	ENSG00000146374		1	1
hsa_can_575-m	87	DACT3	ENSG00000197380	1	1	1	1
hsa_can_575-m	87	EPHA6	ENSG00000080224	1
hsa_can_575-m	86	SNAP91	ENSG00000065609	1	1	1	1
hsa_can_575-m	86	COL1A2	ENSG00000164692	1	1	1	1
hsa_can_575-m	86	RPRD2	ENSG00000163125	1	1	1	1
hsa_can_575-m	86	AMOTL1	ENSG00000166025		1		1
hsa_can_575-m	86	AKAP6	ENSG00000151320	1	1	1	1
hsa_can_575-m	85	SLC47A1	ENSG00000142494		1	1	1
hsa_can_575-m	85	FAIM2	ENSG00000135472		1		1
hsa_can_575-m	85	TIAM1	ENSG00000156299		1	1	1
hsa_can_575-m	84	SP1	ENSG00000185591	1	1	1	1
hsa_can_575-m	84	TFRC	ENSG00000072274		1		1
hsa_can_575-m	83	EIF4EBP2	ENSG00000148730	1	1
hsa_can_575-m	83	SEC61A1	ENSG00000058262	1	1	1	1
hsa_can_575-m	83	CYBRD1	ENSG00000071967		1		1
hsa_can_575-m	82	DNAJB5	ENSG00000137094	1	1	1	1
hsa_can_575-m	82	PARP1	ENSG00000143799	1	1	1
hsa_can_575-m	82	TMEM229A	ENSG00000234224		1
hsa_can_575-m	82	ILDR2	ENSG00000143195		1		1
hsa_can_575-m	81	SERTAD2	ENSG00000179833			1	1
hsa_can_575-m	81	SOCS5	ENSG00000171150	1	1	1	1
hsa_can_575-m	81	GLTP	ENSG00000139433		1	1	1
hsa_can_575-m	81	CISD2	ENSG00000145354	1		1	1
hsa_can_575-m	81	EBF1	ENSG00000164330	1	1	1	1
hsa_can_575-m	81	OTUD4	ENSG00000164164		1	1	1
hsa_can_74-m	99	PELI1	ENSG00000197329	1	1	1	1
hsa_can_74-m	99	EGR4	ENSG00000135625	1	1	1
hsa_can_74-m	99	SOCS5	ENSG00000171150	1	1	1	1
hsa_can_74-m	98	COL12A1	ENSG00000111799	1	1	1	1
hsa_can_74-m	98	ZEB2	ENSG00000169554	1	1	1	1
hsa_can_74-m	98	SDC2	ENSG00000169439	1	1	1	1
hsa_can_74-m	97	C6orf89	ENSG00000198663	1		1
hsa_can_74-m	97	G2E3	ENSG00000092140	1	1	1	1
hsa_can_74-m	97	STAM	ENSG00000136738			1	1
hsa_can_74-m	96	PLXDC2	ENSG00000120594		1
hsa_can_74-m	96	SOCS2	ENSG00000120833	1	1	1	1
hsa_can_74-m	96	PITPNC1	ENSG00000154217	1		1
hsa_can_74-m	96	XBP1	ENSG00000100219	1	1	1
hsa_can_74-m	95	PIK3R1	ENSG00000145675	1	1	1	1
hsa_can_74-m	95	FHL2	ENSG00000115641	1		1
hsa_can_74-m	94	ZNF711	ENSG00000147180	1		1
hsa_can_74-m	94	ARHGAP24	ENSG00000138639	1		1	1
hsa_can_74-m	93	EP300	ENSG00000100393	1		1
hsa_can_74-m	93	CDCA7L	ENSG00000164649	1	1	1
hsa_can_74-m	93	G3BP2	ENSG00000138757	1	1	1
hsa_can_74-m	93	ZMAT3	ENSG00000172667	1	1	1	1
hsa_can_74-m	93	EYA4	ENSG00000112319	1	1	1	1
hsa_can_74-m	92	ZHX1	ENSG00000165156		1	1	1
hsa_can_74-m	92	PIP5K1A	ENSG00000143398	1	1	1	1
hsa_can_74-m	92	ZNF423	ENSG00000102935	1	1	1
hsa_can_74-m	91	SACS	ENSG00000151835	1	1	1	1
hsa_can_74-m	91	AIDA	ENSG00000186063	1	1	1	1
hsa_can_74-m	91	FAM117B	ENSG00000138439	1	1	1	1
hsa_can_74-m	91	C16orf72	ENSG00000182831	1	1	1	1
hsa_can_74-m	91	YOD1	ENSG00000180667	1	1	1	1
hsa_can_74-m	91	ASB7	ENSG00000183475	1	1	1	1
hsa_can_74-m	90	BCAT1	ENSG00000060982		1	1	1
hsa_can_74-m	90	GAB1	ENSG00000109458	1	1	1	1
hsa_can_74-m	90	ITGAV	ENSG00000138448		1		1
hsa_can_74-m	90	KBTBD8	ENSG00000163376	1		1	1
hsa_can_74-m	90	RABGAP1L	ENSG00000152061	1
hsa_can_74-m	89	GLYR1	ENSG00000140632	1		1
hsa_can_74-m	89	CPEB3	ENSG00000107864	1	1		1
hsa_can_74-m	89	CUL5	ENSG00000166266	1	1	1	1
hsa_can_74-m	89	RALA	ENSG00000006451	1			1
hsa_can_74-m	89	TMEM178B	ENSG00000261115	1	1
hsa_can_74-m	89	APBB2	ENSG00000163697	1	1	1	1
hsa_can_74-m	89	CEP41	ENSG00000106477	1		1	1
hsa_can_74-m	88	GABPB1	ENSG00000104064	1	1	1	1
hsa_can_74-m	88	TMEM131	ENSG00000075568	1		1
hsa_can_74-m	88	ARIH1	ENSG00000166233	1	1	1	1
hsa_can_74-m	88	CDK13	ENSG00000065883	1	1	1
hsa_can_74-m	88	IPO8	ENSG00000133704	1	1	1	1
hsa_can_74-m	87	ZFC3H1	ENSG00000133858	1	1		1
hsa_can_74-m	87	KCTD9	ENSG00000104756	1	1	1
hsa_can_74-m	87	SQLE	ENSG00000104549	1
hsa_can_74-m	87	OPA1	ENSG00000198836		1	1	1
hsa_can_74-m	87	PHTF2	ENSG00000006576	1	1	1	1
hsa_can_74-m	87	NRXN1	ENSG00000179915		1	1	1
hsa_can_74-m	86	RAB6A	ENSG00000175582	1	1	1	1
hsa_can_74-m	85	CAMK1D	ENSG00000183049	1	1	1
hsa_can_74-m	85	FBXW7	ENSG00000109670	1	1	1	1
hsa_can_74-m	85	SGPP1	ENSG00000126821		1
hsa_can_74-m	85	WEE1	ENSG00000166483		1		1
hsa_can_74-m	85	HIPK1	ENSG00000163349	1	1	1	1
hsa_can_74-m	85	CPSF6	ENSG00000111605	1	1	1	1
hsa_can_74-m	85	PDS5B	ENSG00000083642		1	1	1
hsa_can_74-m	84	CDKN1B	ENSG00000111276	1	1	1	1
hsa_can_74-m	84	PDCD6IP	ENSG00000170248	1	1	1	1
hsa_can_74-m	84	TMEM87A	ENSG00000103978	1	1	1
hsa_can_74-m	84	SLC39A8	ENSG00000138821	1	1	1	1
hsa_can_74-m	83	ZFHX3	ENSG00000140836	1	1	1	1
hsa_can_74-m	83	HERPUD2	ENSG00000122557	1	1	1	1
hsa_can_74-m	83	YIPF4	ENSG00000119820	1		1	1
hsa_can_74-m	82	MAN2A1	ENSG00000112893	1		1
hsa_can_74-m	82	DCAF6	ENSG00000143164	1
hsa_can_74-m	82	NFIB	ENSG00000147862	1	1	1	1
hsa_can_74-m	81	PTBP3	ENSG00000119314		1	1	1
hsa_can_74-m	81	CSGALNACT1	ENSG00000147408		1	1	1
hsa_can_74-m	81	FAS	ENSG00000026103			1
hsa_can_74-m	81	DNAAF2	ENSG00000165506	1
hsa_can_74-m	81	NFYB	ENSG00000120837	1	1	1	1
hsa-P1-can676-m	100	TMEM135	ENSG00000166575	1	1	1	1
hsa-P1-can676-m	100	BRWD1	ENSG00000185658		1	1	1
hsa-P1-can676-m	100	STARD13	ENSG00000133121	1	1	1	1
hsa-P1-can676-m	100	PHF20	ENSG00000025293		1		1
hsa-P1-can676-m	100	DUSP6	ENSG00000139318		1		1
hsa-P1-can676-m	100	RBAK	ENSG00000146587	1	1	1	1
hsa-P1-can676-m	100	PI4K2B	ENSG00000038210	1	1	1	1
hsa-P1-can676-m	99	ETV3	ENSG00000117036		1	1
hsa-P1-can676-m	99	CBFB	ENSG00000067955	1	1	1	1
hsa-P1-can676-m	99	RASSF3	ENSG00000153179	1	1	1	1
hsa-P1-can676-m	99	CYYR1	ENSG00000166265		1	1	1
hsa-P1-can676-m	99	SUN1	ENSG00000164828	1	1		1
hsa-P1-can676-m	99	FAM234B	ENSG00000084444			1	1
hsa-P1-can676-m	99	FAT4	ENSG00000196159		1
hsa-P1-can676-m	99	VPS4B	ENSG00000119541		1	1	1
hsa-P1-can676-m	99	PCDH7	ENSG00000169851	1	1	1	1
hsa-P1-can676-m	98	STXBP5L	ENSG00000145087	1	1	1	1
hsa-P1-can676-m	98	KIF1B	ENSG00000054523		1	1	1
hsa-P1-can676-m	98	PCNX1	ENSG00000100731		1		1
hsa-P1-can676-m	98	RMND5A	ENSG00000153561	1	1	1
hsa-P1-can676-m	98	VPS37B	ENSG00000139722		1	1	1
hsa-P1-can676-m	98	APC	ENSG00000134982	1	1	1	1
hsa-P1-can676-m	98	SYDE2	ENSG00000097096		1
hsa-P1-can676-m	98	SNX18	ENSG00000178996		1	1	1
hsa-P1-can676-m	97	ESRRG	ENSG00000196482	1	1	1	1
hsa-P1-can676-m	97	GRB10	ENSG00000106070		1	1	1
hsa-P1-can676-m	97	SEL1L	ENSG00000071537	1	1	1	1
hsa-P1-can676-m	97	RASGEF1A	ENSG00000198915		1	1	1
hsa-P1-can676-m	97	SH2B3	ENSG00000111252	1	1	1	1
hsa-P1-can676-m	97	PPP4R3A	ENSG00000100796	1	1	1	1
hsa-P1-can676-m	97	CDH5	ENSG00000179776				1
hsa-P1-can676-m	97	MAP3K1	ENSG00000095015	1	1	1	1
hsa-P1-can676-m	97	GXYLT1	ENSG00000151233		1		1
hsa-P1-can676-m	97	MARK1	ENSG00000116141	1	1	1	1
hsa-P1-can676-m	97	PLEKHA8	ENSG00000106086		1	1	1
hsa-P1-can676-m	96	CREM	ENSG00000095794	1	1		1
hsa-P1-can676-m	96	ENPEP	ENSG00000138792		1		1
hsa-P1-can676-m	96	FGFR2	ENSG00000066468		1		1
hsa-P1-can676-m	96	EPHA4	ENSG00000116106		1		1
hsa-P1-can676-m	96	RFX5	ENSG00000143390		1
hsa-P1-can676-m	96	ST18	ENSG00000147488		1		1
hsa-P1-can676-m	96	SRSF6	ENSG00000124193			1
hsa-P1-can676-m	96	GOLGA5	ENSG00000066455			1
hsa-P1-can676-m	96	ZKSCAN5	ENSG00000196652			1	1
hsa-P1-can676-m	95	ZNF148	ENSG00000163848	1	1	1	1
hsa-P1-can676-m	94	PCM1	ENSG00000078674	1	1	1	1
hsa-P1-can676-m	94	TMCC2	ENSG00000133069			1	1
hsa-P1-can676-m	94	TMEM132E	ENSG00000181291			1	1
hsa-P1-can676-m	94	ZDHHC9	ENSG00000188706	1	1	1	1
hsa-P1-can676-m	94	TNFRSF1B	ENSG00000028137			1	1
hsa-P1-can676-m	94	ZNF697	ENSG00000143067		1	1	1
hsa-P1-can676-m	94	CBLL1	ENSG00000105879	1	1	1	1
hsa-P1-can676-m	94	ATP2B3	ENSG00000067842		1	1	1
hsa-P1-can676-m	93	ZDHHC7	ENSG00000153786		1	1	1
hsa-P1-can676-m	93	CNNM4	ENSG00000158158	1	1	1	1
hsa-P1-can676-m	93	GRHL1	ENSG00000134317	1	1		1
hsa-P1-can676-m	93	ECE1	ENSG00000117298				1
hsa-P1-can676-m	92	KDM4C	ENSG00000107077		1
hsa-P1-can676-m	92	SLCO3A1	ENSG00000176463	1	1	1	1
hsa-P1-can676-m	92	RALGPS2	ENSG00000116191	1	1	1	1
hsa-P1-can676-m	92	SPSB4	ENSG00000175093		1		1
hsa-P1-can676-m	92	PLCB1	ENSG00000182621	1	1	1	1
hsa-P1-can676-m	92	ATL2	ENSG00000119787		1		1
hsa-P1-can676-m	92	SS18	ENSG00000141380		1	1	1
hsa-P1-can676-m	92	PGRMC2	ENSG00000164040	1	1	1	1
hsa-P1-can676-m	92	PLAGL1	ENSG00000118495		1		1
hsa-P1-can676-m	92	ADAM19	ENSG00000135074		1	1	1
hsa-P1-can676-m	91	TTC30B	ENSG00000196659			1
hsa-P1-can676-m	91	CECR2	ENSG00000099954			1	1
hsa-P1-can676-m	91	BAK1	ENSG00000030110		1	1
hsa-P1-can676-m	91	ATXN3	ENSG00000066427	1	1	1	1
hsa-P1-can676-m	91	PROX1	ENSG00000117707			1
hsa-P1-can676-m	91	NIN	ENSG00000100503	1	1	1	1
hsa-P1-can676-m	91	CORO2B	ENSG00000103647		1		1
hsa-P1-can676-m	91	CNTNAP1	ENSG00000108797		1	1	1
hsa-P1-can676-m	91	CELSR2	ENSG00000143126		1		1
hsa-P1-can676-m	91	PEAK1	ENSG00000173517		1		1
hsa-P1-can676-m	90	QSOX2	ENSG00000165661				1
hsa-P1-can676-m	90	SLC24A2	ENSG00000155886	1	1		1
hsa-P1-can676-m	90	SYVN1	ENSG00000162298		1		1
hsa-P1-can676-m	90	OSBPL9	ENSG00000117859		1	1	1
hsa-P1-can676-m	90	MKNK1	ENSG00000079277		1	1	1
hsa-P1-can676-m	89	ZNF586	ENSG00000083828				1
hsa-P1-can676-m	89	SEMA4B	ENSG00000185033		1	1	1
hsa-P1-can676-m	89	CCDC126	ENSG00000169193	1	1	1	1
hsa-P1-can676-m	89	ZSWIM6	ENSG00000130449	1	1	1	1
hsa-P1-can676-m	89	GGA2	ENSG00000103365	1	1		1
hsa-P1-can676-m	89	ALDH3A2	ENSG00000072210		1	1	1
hsa-P1-can676-m	88	RAPGEF5	ENSG00000136237	1	1		1
hsa-P1-can676-m	88	FMR1	ENSG00000102081	1	1		1
hsa-P1-can676-m	88	USP38	ENSG00000170185			1
hsa-P1-can676-m	88	TOX	ENSG00000198846		1		1
hsa-P1-can676-m	88	LACC1	ENSG00000179630	1	1	1	1
hsa-P1-can676-m	87	CHL1	ENSG00000134121	1	1	1	1
hsa-P1-can676-m	87	DLGAP1	ENSG00000170579		1		1
hsa-P1-can676-m	87	ZFP62	ENSG00000196670		1
hsa-P1-can676-m	87	LANCL1	ENSG00000115365	1		1	1
hsa-P1-can676-m	87	VEZF1	ENSG00000136451	1	1		1
hsa-P1-can676-m	87	LCOR	ENSG00000196233	1	1	1	1
hsa-P1-can676-m	87	GCNT1	ENSG00000187210	1		1	1
hsa-P1-can676-m	87	ZSCAN29	ENSG00000140265	1	1	1	1
hsa-P1-can676-m	87	SLC39A9	ENSG00000029364	1	1	1	1
hsa-P1-can676-m	87	RAB6B	ENSG00000154917	1
hsa-P1-can676-m	87	RETREG3	ENSG00000141699	1	1	1	1
hsa-P1-can676-m	87	FANCC	ENSG00000158169			1	1
hsa-P1-can676-m	86	HIPK3	ENSG00000110422	1
hsa-P1-can676-m	86	ARCN1	ENSG00000095139	1	1	1	1
hsa-P1-can676-m	86	DUS1L	ENSG00000169718		1		1
hsa-P1-can676-m	86	CPSF6	ENSG00000111605	1	1	1	1
hsa-P1-can676-m	86	NRIP1	ENSG00000180530	1	1	1	1
hsa-P1-can676-m	86	SCAF11	ENSG00000139218	1	1	1	1
hsa-P1-can676-m	85	TRPS1	ENSG00000104447	1	1	1	1
hsa-P1-can676-m	85	GRAMD2A	ENSG00000175318		1	1	1
hsa-P1-can676-m	84	ST6GAL1	ENSG00000073849	1		1	1
hsa-P1-can676-m	84	ARFGEF3	ENSG00000112379	1	1	1	1
hsa-P1-can676-m	84	SHTN1	ENSG00000187164		1		1
hsa-P1-can676-m	84	TMCC3	ENSG00000057704	1	1	1	1
hsa-P1-can676-m	84	ITCH	ENSG00000078747				1
hsa-P1-can676-m	84	ATXN7	ENSG00000163635	1	1	1	1
hsa-P1-can676-m	84	CDK19	ENSG00000155111	1	1	1	1
hsa-P1-can676-m	84	PKP4	ENSG00000144283		1		1
hsa-P1-can676-m	83	ZNF704	ENSG00000164684		1
hsa-P1-can676-m	83	RBM20	ENSG00000203867		1	1	1
hsa-P1-can676-m	83	FOXN3	ENSG00000053254	1	1	1	1
hsa-P1-can676-m	82	SBNO1	ENSG00000139697	1	1
hsa-P1-can676-m	82	SLC39A6	ENSG00000141424	1	1		1
hsa-P1-can676-m	82	IMPAD1	ENSG00000104331	1	1	1	1
hsa-P1-can676-m	82	JADE3	ENSG00000102221	1		1	1
hsa-P1-can676-m	82	AGPAT3	ENSG00000160216		1		1
hsa-P1-can676-m	82	INTS7	ENSG00000143493			1
hsa-P1-can676-m	81	FZD7	ENSG00000155760		1	1	1
hsa-P1-can676-m	81	ZSWIM5	ENSG00000162415	1	1	1	1
hsa-P1-can676-m	81	GBP2	ENSG00000162645		1		1
hsa-P1-can676-m	81	ABCC5	ENSG00000114770	1	1	1	1
hsa-P1-can676-m	81	NPL	ENSG00000135838				1
hsa-P1-can676-m	81	PCTP	ENSG00000141179	1		1
hsa-P1-can676-m	81	BCL2L2	ENSG00000129473	1	1	1	1
hsa-P1-can888-m	93	GPR55	ENSG00000135898			1	1
hsa-P1-can888-m	91	ARCN1	ENSG00000095139	1	1	1	1
hsa-P1-can888-m	86	VGF	ENSG00000128564	1		1
hsa-P1-can888-m	82	USP9X	ENSG00000124486		1		1
hsa-P1-can888-m	82	RNF141	ENSG00000110315	1	1	1	1
hsa-P1-can888-m	81	CDC42EP1	ENSG00000128283			1	1
hsa-P5-can399-m	99	NR3C1	ENSG00000113580			1	1
hsa-P5-can399-m	97	IL13RA1	ENSG00000131724			1	1
hsa-P5-can399-m	97	PRKCA	ENSG00000154229		1
hsa-P5-can399-m	97	GRAMD1B	ENSG00000023171		1
hsa-P5-can399-m	96	ESR1	ENSG00000091831		1		1
hsa-P5-can399-m	95	MYO10	ENSG00000145555		1	1	1
hsa-P5-can399-m	95	EYA2	ENSG00000064655		1
hsa-P5-can399-m	95	GIGYF1	ENSG00000146830		1		1
hsa-P5-can399-m	94	SLMAP	ENSG00000163681	1	1		1
hsa-P5-can399-m	92	GALNT18	ENSG00000110328		1
hsa-P5-can399-m	92	CHSY1	ENSG00000131873		1		1
hsa-P5-can399-m	91	NT5DC1	ENSG00000178425		1	1	1
hsa-P5-can399-m	91	SHISA6	ENSG00000188803	1	1
hsa-P5-can399-m	91	TM9SF4	ENSG00000101337	1		1	1
hsa-P5-can399-m	90	CPXM2	ENSG00000121898	1		1	1
hsa-P5-can399-m	89	SNPH	ENSG00000101298				1
hsa-P5-can399-m	89	MTURN	ENSG00000180354		1
hsa-P5-can399-m	89	GCC1	ENSG00000179562	1
hsa-P5-can399-m	88	FBXO45	ENSG00000174013	1	1	1	1
hsa-P5-can399-m	88	FGF1	ENSG00000113578		1	1	1
hsa-P5-can399-m	87	KANSL1L	ENSG00000144445		1	1	1
hsa-P5-can399-m	87	PKDCC	ENSG00000162878	1	1	1
hsa-P5-can399-m	87	MARK4	ENSG00000007047			1	1
hsa-P5-can399-m	86	RGS6	ENSG00000182732		1		1
hsa-P5-can399-m	86	CHST3	ENSG00000122863				1
hsa-P5-can399-m	86	FAM185A	ENSG00000222011	1
hsa-P5-can399-m	86	CHD2	ENSG00000173575		1		1
hsa-P5-can399-m	85	NEUROD6	ENSG00000164600	1		1
hsa-P5-can399-m	85	USP2	ENSG00000036672	1		1	1
hsa-P5-can399-m	84	BNIP3L	ENSG00000104765		1		1
hsa-P5-can399-m	84	SPATA5	ENSG00000145375	1		1	1
hsa-P5-can399-m	84	RAB39B	ENSG00000155961		1
hsa-P5-can399-m	83	SCN8A	ENSG00000196876		1		1
hsa-P5-can399-m	83	CERS6	ENSG00000172292		1		1
hsa-P5-can399-m	83	ST3GAL1	ENSG00000008513	1	1		1
hsa-P5-can399-m	83	CPEB3	ENSG00000107864	1	1		1
hsa-P5-can399-m	83	ARHGEF40	ENSG00000165801			1
hsa-P5-can399-m	82	JAK3	ENSG00000105639			1	1
hsa-P5-can399-m	82	DENND4C	ENSG00000137145		1	1	1
hsa-P5-can399-m	81	TMEM245	ENSG00000106771		1		1
hsa-P7-can8443-m	98	USP34	ENSG00000115464		1		1
hsa-P7-can8443-m	97	SMG1	ENSG00000157106	1	1	1	1
hsa-P7-can8443-m	97	FCHSD2	ENSG00000137478		1		1
hsa-P7-can8443-m	97	DCC	ENSG00000187323		1	1
hsa-P7-can8443-m	96	SAMD4A	ENSG00000020577		1		1
hsa-P7-can8443-m	95	ZDHHC21	ENSG00000175893		1	1	1
hsa-P7-can8443-m	95	ILDR2	ENSG00000143195		1		1
hsa-P7-can8443-m	95	SPIN4	ENSG00000186767	1	1	1	1
hsa-P7-can8443-m	95	TNRC6A	ENSG00000090905	1	1	1	1
hsa-P7-can8443-m	94	RAP2A	ENSG00000125249	1	1	1	1
hsa-P7-can8443-m	94	SRPK2	ENSG00000135250		1	1	1
hsa-P7-can8443-m	94	LEF1	ENSG00000138795		1	1	1
hsa-P7-can8443-m	94	EDNRB	ENSG00000136160			1	1
hsa-P7-can8443-m	94	NCBP1	ENSG00000136937		1	1
hsa-P7-can8443-m	93	MARCH8	ENSG00000165406		1		1
hsa-P7-can8443-m	93	CPD	ENSG00000108582		1	1	1
hsa-P7-can8443-m	93	MNT	ENSG00000070444	1	1		1
hsa-P7-can8443-m	93	PTPN11	ENSG00000179295	1	1	1	1
hsa-P7-can8443-m	92	RMND5A	ENSG00000153561	1	1	1
hsa-P7-can8443-m	92	CAMTA1	ENSG00000171735	1	1	1	1
hsa-P7-can8443-m	92	STXBP5	ENSG00000164506		1	1	1
hsa-P7-can8443-m	92	RFFL	ENSG00000092871		1	1	1
hsa-P7-can8443-m	92	CLDN12	ENSG00000157224		1	1	1
hsa-P7-can8443-m	91	NFIC	ENSG00000141905			1	1
hsa-P7-can8443-m	89	LGR4	ENSG00000205213		1	1	1
hsa-P7-can8443-m	89	EXOG	ENSG00000157036		1	1	1
hsa-P7-can8443-m	89	UHRF1BP1	ENSG00000065060	1	1	1	1
hsa-P7-can8443-m	88	STX17	ENSG00000136874		1	1	1
hsa-P7-can8443-m	88	FAM177A1	ENSG00000151327		1		1
hsa-P7-can8443-m	88	PGM2L1	ENSG00000165434	1	1	1	1
hsa-P7-can8443-m	88	PIM3	ENSG00000198355		1		1
hsa-P7-can8443-m	87	SEC63	ENSG00000025796		1	1	1
hsa-P7-can8443-m	87	RALBP1	ENSG00000017797				1
hsa-P7-can8443-m	87	MFSD4B	ENSG00000173214		1	1	1
hsa-P7-can8443-m	87	LARP4B	ENSG00000107929			1	1
hsa-P7-can8443-m	85	CXADR	ENSG00000154639		1		1
hsa-P7-can8443-m	85	OTOF	ENSG00000115155			1
hsa-P7-can8443-m	84	PCDH19	ENSG00000165194	1	1	1	1
hsa-P7-can8443-m	83	RAB27B	ENSG00000041353				1
hsa-P7-can8443-m	83	WASF1	ENSG00000112290		1
hsa-P7-can8443-m	82	TMEM65	ENSG00000164983	1		1	1
hsa-P7-can8443-m	82	NMD3	ENSG00000169251				1
hsa-P7-can8443-m	82	GNS	ENSG00000135677		1		1
hsa-P7-can8443-m	82	LETM1	ENSG00000168924				1
hsa-P7-can8443-m	81	RPS6KA6	ENSG00000072133		1	1	1
hsa-P7-can8443-m	81	WIPI2	ENSG00000157954		1	1	1
hsa-P7-can8443-m	81	RPS6KB1	ENSG00000108443	1	1	1	1
hsa-P9-can627-m	100	SLC4A10	ENSG00000144290	1	1	1	1
hsa-P9-can627-m	99	RIMS2	ENSG00000176406	1	1	1	1
hsa-P9-can627-m	98	FUT9	ENSG00000172461	1	1	1	1
hsa-P9-can627-m	98	LRCH2	ENSG00000130224	1		1	1
hsa-P9-can627-m	95	ARHGAP5	ENSG00000100852	1	1	1	1
hsa-P9-can627-m	95	MTMR7	ENSG00000003987	1		1	1
hsa-P9-can627-m	95	PCDH9	ENSG00000184226		1		1
hsa-P9-can627-m	94	YWHAQ	ENSG00000134308		1		1
hsa-P9-can627-m	93	TMEM41B	ENSG00000166471	1	1	1	1
hsa-P9-can627-m	93	RHEB	ENSG00000106615	1	1
hsa-P9-can627-m	93	MBNL3	ENSG00000076770		1	1	1
hsa-P9-can627-m	92	ATXN7	ENSG00000163635	1	1	1	1
hsa-P9-can627-m	92	DENND4A	ENSG00000174485	1	1	1	1
hsa-P9-can627-m	92	DCC	ENSG00000187323		1	1
hsa-P9-can627-m	91	RAB3GAP2	ENSG00000118873	1	1	1	1
hsa-P9-can627-m	91	STK17B	ENSG00000081320	1	1	1
hsa-P9-can627-m	91	SLC39A8	ENSG00000138821	1	1	1	1
hsa-P9-can627-m	91	STK39	ENSG00000198648	1	1	1
hsa-P9-can627-m	90	ZADH2	ENSG00000180011	1	1	1	1
hsa-P9-can627-m	90	MED14	ENSG00000180182	1	1	1	1
hsa-P9-can627-m	90	HLF	ENSG00000108924		1	1	1
hsa-P9-can627-m	90	TLR3	ENSG00000164342	1
hsa-P9-can627-m	90	C12orf29	ENSG00000133641	1		1
hsa-P9-can627-m	89	PPARG	ENSG00000132170	1
hsa-P9-can627-m	89	PCDH17	ENSG00000118946	1	1	1	1
hsa-P9-can627-m	89	XRCC4	ENSG00000152422		1
hsa-P9-can627-m	89	TSPAN7	ENSG00000156298	1		1
hsa-P9-can627-m	88	COL5A2	ENSG00000204262	1		1	1
hsa-P9-can627-m	88	N4BP2	ENSG00000078177	1	1	1	1
hsa-P9-can627-m	87	RAB10	ENSG00000084733	1	1	1	1
hsa-P9-can627-m	86	CACNG2	ENSG00000166862	1	1	1	1
hsa-P9-can627-m	86	SNAPC3	ENSG00000164975			1
hsa-P9-can627-m	86	FRS2	ENSG00000166225	1	1	1	1
hsa-P9-can627-m	86	KIAA0825	ENSG00000185261			1	1
hsa-P9-can627-m	85	HAPLN3	ENSG00000140511			1
hsa-P9-can627-m	85	USP24	ENSG00000162402	1	1	1	1
hsa-P9-can627-m	85	LIN7C	ENSG00000148943		1	1	1
hsa-P9-can627-m	85	CD47	ENSG00000196776	1	1	1	1
hsa-P9-can627-m	84	ZSWIM6	ENSG00000130449	1	1	1	1
hsa-P9-can627-m	84	C5orf30	ENSG00000181751	1	1		1
hsa-P9-can627-m	84	CDK19	ENSG00000155111	1	1	1	1
hsa-P9-can627-m	83	CACNB4	ENSG00000182389	1	1	1	1
hsa-P9-can627-m	82	RANBP9	ENSG00000010017	1	1	1
hsa-P9-can627-m	82	YY1	ENSG00000100811	1	1	1	1
hsa-P9-can627-m	81	STX12	ENSG00000117758	1		1
hsa-P9-can627-m	81	MBTD1	ENSG00000011258	1	1	1	1
hsa_can_257-m	99	MEST	ENSG00000106484		1	1	1
hsa_can_257-m	99	PDE1B	ENSG00000123360		1	1	1
hsa_can_257-m	98	ASTN1	ENSG00000152092		1		1
hsa_can_257-m	98	EPB41L1	ENSG00000088367	1	1		1
hsa_can_257-m	97	ADAMTSL1	ENSG00000178031		1	1	1
hsa_can_257-m	97	TNKS	ENSG00000173273		1	1	1
hsa_can_257-m	96	ORMDL3	ENSG00000172057		1		1
hsa_can_257-m	94	FAM126B	ENSG00000155744	1	1	1	1
hsa_can_257-m	94	MAP4K5	ENSG00000012983		1		1
hsa_can_257-m	94	LZTS2	ENSG00000107816		1	1	1
hsa_can_257-m	94	HDHD2	ENSG00000167220	1	1		1
hsa_can_257-m	93	PLXNA2	ENSG00000076356		1	1	1
hsa_can_257-m	93	NDRG3	ENSG00000101079	1	1	1	1
hsa_can_257-m	93	ACBD3	ENSG00000182827		1	1	1
hsa_can_257-m	92	KIAA1328	ENSG00000150477			1	1
hsa_can_257-m	92	KLF3	ENSG00000109787	1	1	1	1
hsa_can_257-m	92	PPCDC	ENSG00000138621			1	1
hsa_can_257-m	92	PRICKLE2	ENSG00000163637	1	1		1
hsa_can_257-m	92	GFAP	ENSG00000131095	1	1	1	1
hsa_can_257-m	91	SIRT1	ENSG00000096717		1	1	1
hsa_can_257-m	91	DCDC2B	ENSG00000222046		1	1	1
hsa_can_257-m	91	LIN28A	ENSG00000131914		1	1	1
hsa_can_257-m	89	SYNPO2L	ENSG00000166317	1	1	1	1
hsa_can_257-m	89	MAML2	ENSG00000184384	1		1
hsa_can_257-m	89	DAAM1	ENSG00000100592	1	1		1
hsa_can_257-m	89	RMND5A	ENSG00000153561	1	1	1
hsa_can_257-m	89	AFF1	ENSG00000172493	1	1	1	1
hsa_can_257-m	89	CASK	ENSG00000147044		1
hsa_can_257-m	88	BAIAP2L1	ENSG00000006453		1	1	1
hsa_can_257-m	88	LRRC55	ENSG00000183908	1	1	1	1
hsa_can_257-m	88	PLPP3	ENSG00000162407	1	1	1	1
hsa_can_257-m	88	MAP3K9	ENSG00000006432		1	1	1
hsa_can_257-m	88	SEPT3	ENSG00000100167	1	1	1	1
hsa_can_257-m	87	SH2B3	ENSG00000111252	1	1	1	1
hsa_can_257-m	87	NCKAP5	ENSG00000176771	1	1	1	1
hsa_can_257-m	86	POLDIP2	ENSG00000004142		1		1
hsa_can_257-m	86	STX6	ENSG00000135823		1	1	1
hsa_can_257-m	86	RBM18	ENSG00000119446		1	1	1
hsa_can_257-m	86	SEC61A1	ENSG00000058262	1	1	1	1
hsa_can_257-m	85	RAB31	ENSG00000168461	1	1	1	1
hsa_can_257-m	85	NRXN1	ENSG00000179915		1	1	1
hsa_can_257-m	85	BTBD3	ENSG00000132640		1		1
hsa_can_257-m	84	RCE1	ENSG00000173653	1	1	1
hsa_can_257-m	84	NEDD4L	ENSG00000049759	1	1		1
hsa_can_257-m	84	GRAMD2A	ENSG00000175318		1	1	1
hsa_can_257-m	84	PRKAR2A	ENSG00000114302		1		1
hsa_can_257-m	84	MAP3K7CL	ENSG00000156265	1			1
hsa_can_257-m	83	EPHA4	ENSG00000116106		1		1
hsa_can_257-m	83	PPIP5K1	ENSG00000168781		1
hsa_can_257-m	83	ZBTB43	ENSG00000169155		1		1
hsa_can_257-m	83	TCEAL7	ENSG00000182916		1		1
hsa_can_257-m	82	OXSR1	ENSG00000172939	1	1	1	1
hsa_can_257-m	82	SGPL1	ENSG00000166224	1	1	1	1
hsa_can_257-m	82	BRPF3	ENSG00000096070	1	1	1	1
hsa_can_257-m	82	HEY2	ENSG00000135547		1	1	1
hsa_can_257-m	82	TSPAN9	ENSG00000011105		1	1	1
hsa_can_257-m	82	FBXL16	ENSG00000127585		1	1	1
hsa_can_257-m	81	RAB6B	ENSG00000154917	1
hsa_can_257-m	81	TCEAL8	ENSG00000180964	1	1	1
hsa_can_257-m	81	EIF4B	ENSG00000063046	1	1	1	1
hsa_can_257-m	81	PEAK1	ENSG00000173517		1		1
hsa_can_270-m	100	RGL1	ENSG00000143344	1	1	1	1
hsa_can_270-m	100	UBE2E3	ENSG00000170035		1
hsa_can_270-m	100	COL4A3BP	ENSG00000113163	1	1	1	1
hsa_can_270-m	99	ANKRD17	ENSG00000132466		1	1	1
hsa_can_270-m	99	PPP3R1	ENSG00000221823	1	1	1	1
hsa_can_270-m	99	GNG12	ENSG00000172380		1	1	1
hsa_can_270-m	99	ZEB2	ENSG00000169554	1	1	1	1
hsa_can_270-m	98	LCOR	ENSG00000196233	1	1	1	1
hsa_can_270-m	98	C21orf91	ENSG00000154642			1	1
hsa_can_270-m	97	ZNF770	ENSG00000198146		1	1	1
hsa_can_270-m	97	MORC3	ENSG00000159256	1		1	1
hsa_can_270-m	97	RORB	ENSG00000198963		1	1	1
hsa_can_270-m	96	CLCN3	ENSG00000109572	1	1		1
hsa_can_270-m	96	INSIG1	ENSG00000186480	1	1		1
hsa_can_270-m	96	TMEM178B	ENSG00000261115	1	1
hsa_can_270-m	96	GPM6A	ENSG00000150625	1	1	1	1
hsa_can_270-m	95	EPHB1	ENSG00000154928	1	1	1	1
hsa_can_270-m	95	DENND1A	ENSG00000119522		1		1
hsa_can_270-m	95	TMEM229A	ENSG00000234224		1
hsa_can_270-m	94	MRPL17	ENSG00000158042		1	1	1
hsa_can_270-m	94	BICD2	ENSG00000185963	1	1	1	1
hsa_can_270-m	94	CD164	ENSG00000135535	1	1		1
hsa_can_270-m	94	NFKBIZ	ENSG00000144802		1		1
hsa_can_270-m	93	HNRNPA3	ENSG00000170144		1		1
hsa_can_270-m	93	TRIB1	ENSG00000173334	1	1	1	1
hsa_can_270-m	93	SLC17A6	ENSG00000091664		1		1
hsa_can_270-m	93	BACH2	ENSG00000112182	1	1		1
hsa_can_270-m	93	GREM2	ENSG00000180875	1	1	1	1
hsa_can_270-m	93	ZDHHC21	ENSG00000175893		1	1	1
hsa_can_270-m	93	SEMA3C	ENSG00000075223	1		1	1
hsa_can_270-m	93	PCMTD1	ENSG00000168300		1		1
hsa_can_270-m	93	LPP	ENSG00000145012		1
hsa_can_270-m	93	SPICE1	ENSG00000163611	1	1	1	1
hsa_can_270-m	92	PSMD7	ENSG00000103035		1
hsa_can_270-m	92	NEO1	ENSG00000067141	1	1		1
hsa_can_270-m	92	RHOQ	ENSG00000119729		1	1	1
hsa_can_270-m	92	CAP2	ENSG00000112186		1		1
hsa_can_270-m	92	CUL2	ENSG00000108094	1	1	1	1
hsa_can_270-m	92	TNIK	ENSG00000154310		1		1
hsa_can_270-m	92	ANKRD13A	ENSG00000076513		1	1	1
hsa_can_270-m	91	HMCN1	ENSG00000143341		1
hsa_can_270-m	91	CDKN1B	ENSG00000111276	1	1	1	1
hsa_can_270-m	91	CAV2	ENSG00000105971		1		1
hsa_can_270-m	91	DCP2	ENSG00000172795		1		1
hsa_can_270-m	91	STX12	ENSG00000117758	1		1
hsa_can_270-m	91	MTMR12	ENSG00000150712	1	1	1	1
hsa_can_270-m	91	GALNT7	ENSG00000109586	1	1	1	1
hsa_can_270-m	90	ARCN1	ENSG00000095139	1	1	1	1
hsa_can_270-m	90	SORCS3	ENSG00000156395	1	1	1	1
hsa_can_270-m	90	ASCC3	ENSG00000112249			1	1
hsa_can_270-m	90	CAMSAP2	ENSG00000118200		1	1	1
hsa_can_270-m	89	VAPA	ENSG00000101558		1	1	1
hsa_can_270-m	89	PPP1R3B	ENSG00000173281		1	1	1
hsa_can_270-m	89	ELP2	ENSG00000134759		1
hsa_can_270-m	88	DIAPH2	ENSG00000147202		1
hsa_can_270-m	88	EDEM1	ENSG00000134109	1			1
hsa_can_270-m	88	MPRIP	ENSG00000133030		1
hsa_can_270-m	88	RAPGEF5	ENSG00000136237	1	1		1
hsa_can_270-m	88	RALGAPA1	ENSG00000174373	1	1		1
hsa_can_270-m	88	PKNOX1	ENSG00000160199		1		1
hsa_can_270-m	88	RWDD4	ENSG00000182552	1	1	1	1
hsa_can_270-m	88	ADGRG2	ENSG00000173698		1		1
hsa_can_270-m	87	MICU3	ENSG00000155970			1
hsa_can_270-m	87	ZFX	ENSG00000005889		1		1
hsa_can_270-m	87	DICER1	ENSG00000100697		1		1
hsa_can_270-m	87	ULK2	ENSG00000083290	1	1	1
hsa_can_270-m	87	TNKS2	ENSG00000107854		1		1
hsa_can_270-m	86	N4BP2	ENSG00000078177	1	1	1	1
hsa_can_270-m	86	TET3	ENSG00000187605		1		1
hsa_can_270-m	86	ARID5B	ENSG00000150347	1	1	1	1
hsa_can_270-m	86	PLXNC1	ENSG00000136040	1	1	1	1
hsa_can_270-m	86	ADAM22	ENSG00000008277		1		1
hsa_can_270-m	86	BCL2L11	ENSG00000153094	1	1		1
hsa_can_270-m	86	SOS1	ENSG00000115904	1	1	1	1
hsa_can_270-m	85	ELOVL5	ENSG00000012660	1	1
hsa_can_270-m	85	ASXL2	ENSG00000143970		1		1
hsa_can_270-m	85	PWP1	ENSG00000136045		1
hsa_can_270-m	85	NFYB	ENSG00000120837	1	1	1	1
hsa_can_270-m	85	PTPRF	ENSG00000142949		1	1	1
hsa_can_270-m	85	ZNF362	ENSG00000160094		1	1	1
hsa_can_270-m	85	OXSR1	ENSG00000172939	1	1	1	1
hsa_can_270-m	84	SMG1	ENSG00000157106	1	1	1	1
hsa_can_270-m	84	CPSF6	ENSG00000111605	1	1	1	1
hsa_can_270-m	84	ITPR3	ENSG00000096433		1		1
hsa_can_270-m	83	SEC23A	ENSG00000100934		1
hsa_can_270-m	83	CADM1	ENSG00000182985		1	1	1
hsa_can_270-m	83	SMAD2	ENSG00000175387	1	1	1	1
hsa_can_270-m	83	USP42	ENSG00000106346		1		1
hsa_can_270-m	83	SMNDC1	ENSG00000119953		1
hsa_can_270-m	83	FBXL4	ENSG00000112234		1
hsa_can_270-m	83	ARL5B	ENSG00000165997		1	1	1
hsa_can_270-m	83	RNF216	ENSG00000011275		1		1
hsa_can_270-m	82	PROX1	ENSG00000117707			1
hsa_can_270-m	82	RORA	ENSG00000069667	1	1		1
hsa_can_270-m	82	ZNF777	ENSG00000196453		1
hsa_can_270-m	82	ATAD2B	ENSG00000119778	1	1	1	1
hsa_can_270-m	81	TGFBR2	ENSG00000163513	1	1	1	1
hsa_can_270-m	81	MED13	ENSG00000108510	1	1	1	1
hsa_can_270-m	81	SFMBT1	ENSG00000163935		1		1
hsa_can_270-m	81	IL13RA1	ENSG00000131724			1	1
hsa_can_270-m	81	MBNL3	ENSG00000076770		1	1	1
hsa_can_270-m	81	MAN1A2	ENSG00000198162	1	1	1	1
hsa_can_270-m	81	EZR	ENSG00000092820		1		1
hsa_can_270-m	81	ADAMTS6	ENSG00000049192		1	1	1
hsa_can_270-m	81	TAOK1	ENSG00000160551		1		1
hsa_can_270-m	81	PRPF4B	ENSG00000112739		1		1
hsa-chr2_4541-m	100	PTBP1	ENSG00000011304	1	1		1
hsa-chr2_4541-m	100	SLC38A2	ENSG00000134294	1	1	1	1
hsa-chr2_4541-m	100	USB1	ENSG00000103005	1	1	1	1
hsa-chr2_4541-m	99	ARID5B	ENSG00000150347	1	1	1	1
hsa-chr2_4541-m	99	SH2B3	ENSG00000111252	1	1	1	1
hsa-chr2_4541-m	99	KLHL14	ENSG00000197705	1	1	1	1
hsa-chr2_4541-m	98	SLC38A1	ENSG00000111371	1		1	1
hsa-chr2_4541-m	98	RUNDC3B	ENSG00000105784		1	1	1
hsa-chr2_4541-m	98	TK2	ENSG00000166548	1
hsa-chr2_4541-m	97	DPF2	ENSG00000133884	1	1	1	1
hsa-chr2_4541-m	97	KAT6A	ENSG00000083168	1	1	1	1
hsa-chr2_4541-m	97	SELENOI	ENSG00000138018		1		1
hsa-chr2_4541-m	96	PCDH9	ENSG00000184226		1		1
hsa-chr2_4541-m	96	TMEM70	ENSG00000175606	1			1
hsa-chr2_4541-m	96	DESI1	ENSG00000100418	1	1	1	1
hsa-chr2_4541-m	95	PLA2G5	ENSG00000127472	1	1	1
hsa-chr2_4541-m	95	PDE1B	ENSG00000123360		1	1	1
hsa-chr2_4541-m	95	TNK2	ENSG00000061938	1	1	1	1
hsa-chr2_4541-m	94	USP2	ENSG00000036672	1		1	1
hsa-chr2_4541-m	94	MAPK1	ENSG00000100030	1	1		1
hsa-chr2_4541-m	94	SLC35B4	ENSG00000205060	1	1	1	1
hsa-chr2_4541-m	94	GPD2	ENSG00000115159	1	1	1	1
hsa-chr2_4541-m	94	CLCN6	ENSG00000011021	1		1	1
hsa-chr2_4541-m	94	CMKLR1	ENSG00000174600		1	1	1
hsa-chr2_4541-m	94	DYNLL1	ENSG00000088986	1	1
hsa-chr2_4541-m	93	RNF185	ENSG00000138942	1	1	1	1
hsa-chr2_4541-m	93	NEMP1	ENSG00000166881	1		1	1
hsa-chr2_4541-m	93	NADK2	ENSG00000152620	1		1	1
hsa-chr2_4541-m	93	PRKCA	ENSG00000154229		1
hsa-chr2_4541-m	93	PLXNA2	ENSG00000076356		1	1	1
hsa-chr2_4541-m	92	TAF1B	ENSG00000115750	1		1
hsa-chr2_4541-m	92	MRAS	ENSG00000158186			1	1
hsa-chr2_4541-m	92	SDK2	ENSG00000069188		1		1
hsa-chr2_4541-m	92	EPB41L1	ENSG00000088367	1	1		1
hsa-chr2_4541-m	92	C5orf22	ENSG00000082213	1	1	1	1
hsa-chr2_4541-m	92	IMPACT	ENSG00000154059		1		1
hsa-chr2_4541-m	92	VPS39	ENSG00000166887	1	1	1	1
hsa-chr2_4541-m	92	ANKRD45	ENSG00000183831	1		1	1
hsa-chr2_4541-m	91	DCDC2B	ENSG00000222046		1	1	1
hsa-chr2_4541-m	91	VLDLR	ENSG00000147852	1	1	1	1
hsa-chr2_4541-m	91	TAF12	ENSG00000120656	1	1	1	1
hsa-chr2_4541-m	91	ZSWIM5	ENSG00000162415	1	1	1	1
hsa-chr2_4541-m	91	RICTOR	ENSG00000164327		1	1	1
hsa-chr2_4541-m	91	MYO1C	ENSG00000197879	1	1	1	1
hsa-chr2_4541-m	91	TMEM87B	ENSG00000153214	1	1	1	1
hsa-chr2_4541-m	91	ETS1	ENSG00000134954		1	1	1
hsa-chr2_4541-m	91	TEX2	ENSG00000136478		1		1
hsa-chr2_4541-m	90	IL10RA	ENSG00000110324	1	1	1	1
hsa-chr2_4541-m	90	GOSR1	ENSG00000108587	1	1		1
hsa-chr2_4541-m	90	PHC3	ENSG00000173889	1	1		1
hsa-chr2_4541-m	90	PTPN3	ENSG00000070159	1	1	1	1
hsa-chr2_4541-m	90	CERS6	ENSG00000172292		1		1
hsa-chr2_4541-m	89	GPR83	ENSG00000123901		1	1	1
hsa-chr2_4541-m	89	JAKMIP3	ENSG00000188385	1	1	1	1
hsa-chr2_4541-m	89	SRPRA	ENSG00000182934	1	1	1	1
hsa-chr2_4541-m	89	RAB21	ENSG00000080371	1	1	1	1
hsa-chr2_4541-m	89	KIAA1328	ENSG00000150477			1	1
hsa-chr2_4541-m	89	BBX	ENSG00000114439	1	1	1	1
hsa-chr2_4541-m	89	FBXO21	ENSG00000135108	1	1	1	1
hsa-chr2_4541-m	89	AGBL3	ENSG00000146856	1	1	1	1
hsa-chr2_4541-m	88	CD34	ENSG00000174059		1	1
hsa-chr2_4541-m	88	PDCD6IP	ENSG00000170248	1	1	1	1
hsa-chr2_4541-m	88	PPP2R5E	ENSG00000154001	1	1		1
hsa-chr2_4541-m	88	MAML2	ENSG00000184384	1		1
hsa-chr2_4541-m	88	LUZP1	ENSG00000169641		1
hsa-chr2_4541-m	87	PDGFRA	ENSG00000134853	1	1	1	1
hsa-chr2_4541-m	87	PCNX1	ENSG00000100731		1		1
hsa-chr2_4541-m	87	SHISA7	ENSG00000187902		1
hsa-chr2_4541-m	87	FOXM1	ENSG00000111206		1		1
hsa-chr2_4541-m	86	SPRY2	ENSG00000136158		1		1
hsa-chr2_4541-m	86	SH3BGR	ENSG00000185437	1	1		1
hsa-chr2_4541-m	86	STAU1	ENSG00000124214	1	1	1	1
hsa-chr2_4541-m	86	ERBB4	ENSG00000178568	1	1	1	1
hsa-chr2_4541-m	86	CSNK2A1	ENSG00000101266		1		1
hsa-chr2_4541-m	85	RNGTT	ENSG00000111880	1	1		1
hsa-chr2_4541-m	85	MYO15A	ENSG00000091536	1		1	1
hsa-chr2_4541-m	85	ETF1	ENSG00000120705	1	1	1	1
hsa-chr2_4541-m	85	TYRO3	ENSG00000092445	1		1	1
hsa-chr2_4541-m	85	ADGRL1	ENSG00000072071		1
hsa-chr2_4541-m	84	EIF2S1	ENSG00000134001	1	1		1
hsa-chr2_4541-m	84	FGF1	ENSG00000113578		1	1	1
hsa-chr2_4541-m	84	BTRC	ENSG00000166167		1	1	1
hsa-chr2_4541-m	84	FBXL16	ENSG00000127585		1	1	1
hsa-chr2_4541-m	84	ANP32E	ENSG00000143401	1		1	1
hsa-chr2_4541-m	84	ASIC1	ENSG00000110881		1	1	1
hsa-chr2_4541-m	84	SPATA5	ENSG00000145375	1		1	1
hsa-chr2_4541-m	84	ZNF268	ENSG00000090612	1		1	1
hsa-chr2_4541-m	83	NCKAP5	ENSG00000176771	1	1	1	1
hsa-chr2_4541-m	83	AGPAT5	ENSG00000155189		1	1	1
hsa-chr2_4541-m	83	NUBPL	ENSG00000151413	1	1	1	1
hsa-chr2_4541-m	83	SNX30	ENSG00000148158		1		1
hsa-chr2_4541-m	83	DHX33	ENSG00000005100	1	1	1	1
hsa-chr2_4541-m	83	SDK1	ENSG00000146555				1
hsa-chr2_4541-m	83	TOR1AIP1	ENSG00000143337		1	1	1
hsa-chr2_4541-m	83	CNDP1	ENSG00000150656	1		1
hsa-chr2_4541-m	83	RNF150	ENSG00000170153	1		1	1
hsa-chr2_4541-m	83	NGFR	ENSG00000064300				1
hsa-chr2_4541-m	82	ZNF135	ENSG00000176293			1	1
hsa-chr2_4541-m	82	ANTXR1	ENSG00000169604	1	1	1	1
hsa-chr2_4541-m	82	ENPP5	ENSG00000112796		1	1	1
hsa-chr2_4541-m	82	SMOC2	ENSG00000112562	1	1	1	1
hsa-chr2_4541-m	81	PAX7	ENSG00000009709	1	1	1	1
hsa-chr2_4541-m	81	SRP19	ENSG00000153037		1
hsa-chr2_4541-m	81	HDHD2	ENSG00000167220	1	1		1
hsa-chr2_4541-m	81	ZNF322	ENSG00000181315	1	1	1	1
hsa-chr2_4541-m	81	SLC24A3	ENSG00000185052		1	1	1
hsa-chr2_4541-m	81	NRAS	ENSG00000213281	1	1	1	1
hsa-chr2_4541-m	81	KLHL9	ENSG00000198642	1	1	1	1
hsa-chr2_4541-m	81	LZTS2	ENSG00000107816		1	1	1
hsa-chr5_13097-m	100	DENND1B	ENSG00000213047	1	1	1	1
hsa-chr5_13097-m	100	GXYLT1	ENSG00000151233		1		1
hsa-chr5_13097-m	100	ABL2	ENSG00000143322		1	1	1
hsa-chr5_13097-m	99	ITM2B	ENSG00000136156	1
hsa-chr5_13097-m	99	VASH1	ENSG00000071246		1
hsa-chr5_13097-m	99	IGFBP5	ENSG00000115461	1
hsa-chr5_13097-m	99	MSI2	ENSG00000153944	1	1		1
hsa-chr5_13097-m	98	AHCYL1	ENSG00000168710		1		1
hsa-chr5_13097-m	98	EPM2AIP1	ENSG00000178567	1		1	1
hsa-chr5_13097-m	98	CRELD1	ENSG00000163703	1	1	1
hsa-chr5_13097-m	98	NECAP1	ENSG00000089818	1	1		1
hsa-chr5_13097-m	98	RSRC2	ENSG00000111011		1		1
hsa-chr5_13097-m	98	ATP6V1A	ENSG00000114573			1	1
hsa-chr5_13097-m	98	ZBTB44	ENSG00000196323		1		1
hsa-chr5_13097-m	98	DIP2B	ENSG00000066084	1	1	1	1
hsa-chr5_13097-m	97	LRP12	ENSG00000147650		1		1
hsa-chr5_13097-m	97	SEMA5A	ENSG00000112902		1	1
hsa-chr5_13097-m	97	TET1	ENSG00000138336	1	1	1	1
hsa-chr5_13097-m	97	TTPA	ENSG00000137561	1		1
hsa-chr5_13097-m	96	ELMOD1	ENSG00000110675		1	1	1
hsa-chr5_13097-m	96	GOLM1	ENSG00000135052			1	1
hsa-chr5_13097-m	96	MYO6	ENSG00000196586		1	1	1
hsa-chr5_13097-m	96	FGF9	ENSG00000102678	1	1	1	1
hsa-chr5_13097-m	95	THRB	ENSG00000151090			1	1
hsa-chr5_13097-m	95	SRSF11	ENSG00000116754		1
hsa-chr5_13097-m	95	EIF2AK3	ENSG00000172071		1
hsa-chr5_13097-m	95	RIC3	ENSG00000166405	1	1		1
hsa-chr5_13097-m	95	SCAMP4	ENSG00000227500				1
hsa-chr5_13097-m	94	SLC16A7	ENSG00000118596		1		1
hsa-chr5_13097-m	94	PSME4	ENSG00000068878	1		1	1
hsa-chr5_13097-m	94	AKAP6	ENSG00000151320	1	1	1	1
hsa-chr5_13097-m	94	GABARAPL1	ENSG00000139112		1		1
hsa-chr5_13097-m	93	ADD3	ENSG00000148700		1	1	1
hsa-chr5_13097-m	93	PHF6	ENSG00000156531		1		1
hsa-chr5_13097-m	93	ITGB8	ENSG00000105855	1	1	1	1
hsa-chr5_13097-m	93	RBM24	ENSG00000112183	1	1		1
hsa-chr5_13097-m	93	GALNT7	ENSG00000109586	1	1	1	1
hsa-chr5_13097-m	93	MAP1B	ENSG00000131711		1	1	1
hsa-chr5_13097-m	93	STRN3	ENSG00000196792		1
hsa-chr5_13097-m	92	TRAPPC8	ENSG00000153339	1	1	1	1
hsa-chr5_13097-m	92	PATL1	ENSG00000166889	1	1	1	1
hsa-chr5_13097-m	92	AKAP13	ENSG00000170776		1		1
hsa-chr5_13097-m	91	RALBP1	ENSG00000017797				1
hsa-chr5_13097-m	91	CPD	ENSG00000108582		1	1	1
hsa-chr5_13097-m	91	CBFB	ENSG00000067955	1	1	1	1
hsa-chr5_13097-m	90	SSH2	ENSG00000141298		1		1
hsa-chr5_13097-m	90	CNNM3	ENSG00000168763		1	1	1
hsa-chr5_13097-m	89	SLC4A8	ENSG00000050438	1	1	1	1
hsa-chr5_13097-m	89	PATJ	ENSG00000132849	1	1	1	1
hsa-chr5_13097-m	89	PTPRB	ENSG00000127329		1	1	1
hsa-chr5_13097-m	89	KRAS	ENSG00000133703		1	1	1
hsa-chr5_13097-m	88	PAPPA	ENSG00000182752		1		1
hsa-chr5_13097-m	88	TMX4	ENSG00000125827			1	1
hsa-chr5_13097-m	88	RNF6	ENSG00000127870		1		1
hsa-chr5_13097-m	88	UBE2E3	ENSG00000170035		1
hsa-chr5_13097-m	88	SHISA7	ENSG00000187902		1
hsa-chr5_13097-m	88	KLF12	ENSG00000118922	1	1
hsa-chr5_13097-m	88	NFASC	ENSG00000163531		1	1
hsa-chr5_13097-m	88	USP24	ENSG00000162402	1	1	1	1
hsa-chr5_13097-m	88	ETV6	ENSG00000139083		1		1
hsa-chr5_13097-m	87	HIPK2	ENSG00000064393	1	1
hsa-chr5_13097-m	87	NFXL1	ENSG00000170448	1
hsa-chr5_13097-m	87	VAPB	ENSG00000124164			1	1
hsa-chr5_13097-m	87	ITGA6	ENSG00000091409		1		1
hsa-chr5_13097-m	87	LARP4	ENSG00000161813	1	1	1	1
hsa-chr5_13097-m	87	NPR3	ENSG00000113389	1	1	1	1
hsa-chr5_13097-m	87	SIX4	ENSG00000100625	1	1	1	1
hsa-chr5_13097-m	87	USP45	ENSG00000123552	1		1	1
hsa-chr5_13097-m	86	FRMD5	ENSG00000171877	1		1
hsa-chr5_13097-m	86	ZDHHC9	ENSG00000188706	1	1	1	1
hsa-chr5_13097-m	86	HTR2C	ENSG00000147246	1	1	1	1
hsa-chr5_13097-m	86	FAR1	ENSG00000197601	1		1	1
hsa-chr5_13097-m	86	PDE5A	ENSG00000138735			1	1
hsa-chr5_13097-m	85	RAB11FIP4	ENSG00000131242	1	1
hsa-chr5_13097-m	85	NAA30	ENSG00000139977	1	1	1	1
hsa-chr5_13097-m	84	PAG1	ENSG00000076641	1	1	1	1
hsa-chr5_13097-m	84	WWC3	ENSG00000047644		1		1
hsa-chr5_13097-m	84	SNX27	ENSG00000143376	1		1
hsa-chr5_13097-m	83	WASF3	ENSG00000132970	1	1	1	1
hsa-chr5_13097-m	83	OTUD4	ENSG00000164164		1	1	1
hsa-chr5_13097-m	83	EGLN1	ENSG00000135766	1	1	1	1
hsa-chr5_13097-m	83	PTPRT	ENSG00000196090	1	1
hsa-chr5_13097-m	83	PHTF2	ENSG00000006576	1	1	1	1
hsa-chr5_13097-m	83	NSD2	ENSG00000109685		1	1	1
hsa-chr5_13097-m	83	FNDC3B	ENSG00000075420		1		1
hsa-chr5_13097-m	82	TSHR	ENSG00000165409		1	1	1
hsa-chr5_13097-m	82	SECISBP2L	ENSG00000138593	1	1	1	1
hsa-chr5_13097-m	82	FGF1	ENSG00000113578		1	1	1
hsa-chr5_13097-m	82	FREM1	ENSG00000164946	1	1	1	1
hsa-chr5_13097-m	81	ZNF346	ENSG00000113761				1
hsa-chr5_13097-m	81	TMEM242	ENSG00000215712	1	1	1	1
hsa-chr5_14497-s	100	GLCE	ENSG00000138604	1	1	1	1
hsa-chr5_14497-s	100	PIEZO2	ENSG00000154864			1	1
hsa-chr5_14497-s	100	C3orf70	ENSG00000187068		1		1
hsa-chr5_14497-s	100	ZEB2	ENSG00000169554	1	1	1	1
hsa-chr5_14497-s	99	MED17	ENSG00000042429	1	1		1
hsa-chr5_14497-s	99	MDGA2	ENSG00000139915		1	1	1
hsa-chr5_14497-s	99	HECTD2	ENSG00000165338		1	1	1
hsa-chr5_14497-s	99	RELN	ENSG00000189056		1		1
hsa-chr5_14497-s	99	GFPT1	ENSG00000198380	1	1	1	1
hsa-chr5_14497-s	99	VAT1	ENSG00000108828		1	1	1
hsa-chr5_14497-s	98	DCDC2	ENSG00000146038			1	1
hsa-chr5_14497-s	98	SHANK2	ENSG00000162105		1	1	1
hsa-chr5_14497-s	98	SHTN1	ENSG00000187164		1		1
hsa-chr5_14497-s	98	KLHL29	ENSG00000119771		1		1
hsa-chr5_14497-s	98	SPOCK3	ENSG00000196104		1	1	1
hsa-chr5_14497-s	97	PLXNC1	ENSG00000136040	1	1	1	1
hsa-chr5_14497-s	97	CTNND2	ENSG00000169862		1		1
hsa-chr5_14497-s	97	VOPP1	ENSG00000154978		1		1
hsa-chr5_14497-s	97	TPD52	ENSG00000076554		1	1	1
hsa-chr5_14497-s	97	MAST4	ENSG00000069020		1	1	1
hsa-chr5_14497-s	97	RIPOR2	ENSG00000111913	1	1	1	1
hsa-chr5_14497-s	97	UBR3	ENSG00000144357	1	1	1	1
hsa-chr5_14497-s	97	ACSL1	ENSG00000151726	1	1		1
hsa-chr5_14497-s	96	PPP2R5A	ENSG00000066027		1
hsa-chr5_14497-s	96	THSD7A	ENSG00000005108	1	1		1
hsa-chr5_14497-s	96	HIVEP1	ENSG00000095951		1
hsa-chr5_14497-s	96	IPO8	ENSG00000133704	1	1	1	1
hsa-chr5_14497-s	96	LHFPL6	ENSG00000183722				1
hsa-chr5_14497-s	96	CADM2	ENSG00000175161		1	1	1
hsa-chr5_14497-s	95	TMX1	ENSG00000139921	1	1	1	1
hsa-chr5_14497-s	95	FCHO2	ENSG00000157107		1	1	1
hsa-chr5_14497-s	95	PHC3	ENSG00000173889	1	1		1
hsa-chr5_14497-s	95	ABRAXAS2	ENSG00000165660	1	1	1	1
hsa-chr5_14497-s	95	NAV3	ENSG00000067798	1	1	1	1
hsa-chr5_14497-s	95	ELOVL5	ENSG00000012660	1	1
hsa-chr5_14497-s	95	MEGF9	ENSG00000106780	1	1	1	1
hsa-chr5_14497-s	95	GPR63	ENSG00000112218		1
hsa-chr5_14497-s	95	KCNIP3	ENSG00000115041		1	1	1
hsa-chr5_14497-s	95	TMEM25	ENSG00000149582	1	1	1	1
hsa-chr5_14497-s	95	PDE7A	ENSG00000205268	1	1	1	1
hsa-chr5_14497-s	94	SLC6A1	ENSG00000157103				1
hsa-chr5_14497-s	94	RRP1B	ENSG00000160208		1		1
hsa-chr5_14497-s	94	L3MBTL3	ENSG00000198945		1		1
hsa-chr5_14497-s	94	SHISA6	ENSG00000188803	1	1
hsa-chr5_14497-s	94	UBQLN2	ENSG00000188021	1	1	1	1
hsa-chr5_14497-s	94	TRIM9	ENSG00000100505	1	1	1	1
hsa-chr5_14497-s	94	SPSB1	ENSG00000171621	1		1
hsa-chr5_14497-s	94	LGR4	ENSG00000205213		1	1	1
hsa-chr5_14497-s	94	GABRB3	ENSG00000166206	1		1	1
hsa-chr5_14497-s	94	SLC5A12	ENSG00000148942		1	1	1
hsa-chr5_14497-s	94	SNX18	ENSG00000178996		1	1	1
hsa-chr5_14497-s	93	ROBO1	ENSG00000169855				1
hsa-chr5_14497-s	93	SERP1	ENSG00000120742	1	1	1	1
hsa-chr5_14497-s	93	SNX4	ENSG00000114520	1	1		1
hsa-chr5_14497-s	93	GOLGA7	ENSG00000147533		1	1
hsa-chr5_14497-s	93	TRHDE	ENSG00000072657		1		1
hsa-chr5_14497-s	93	SH3D19	ENSG00000109686	1	1	1	1
hsa-chr5_14497-s	93	SOCS6	ENSG00000170677		1	1	1
hsa-chr5_14497-s	93	GALNT3	ENSG00000115339		1		1
hsa-chr5_14497-s	93	INHBB	ENSG00000163083	1	1		1
hsa-chr5_14497-s	93	HLF	ENSG00000108924		1	1	1
hsa-chr5_14497-s	93	CDK6	ENSG00000105810		1		1
hsa-chr5_14497-s	93	RBM47	ENSG00000163694	1	1	1	1
hsa-chr5_14497-s	92	SFRP2	ENSG00000145423		1		1
hsa-chr5_14497-s	92	DIRAS2	ENSG00000165023		1	1	1
hsa-chr5_14497-s	92	UBE2H	ENSG00000186591	1		1
hsa-chr5_14497-s	92	JADE1	ENSG00000077684	1	1	1	1
hsa-chr5_14497-s	92	EIF5A2	ENSG00000163577		1		1
hsa-chr5_14497-s	92	GPM6A	ENSG00000150625	1	1	1	1
hsa-chr5_14497-s	92	GPR161	ENSG00000143147			1	1
hsa-chr5_14497-s	92	TTC39C	ENSG00000168234	1	1	1	1
hsa-chr5_14497-s	91	CTTNBP2NL	ENSG00000143079		1		1
hsa-chr5_14497-s	91	USP32	ENSG00000170832		1	1
hsa-chr5_14497-s	91	ZBTB11	ENSG00000066422		1	1
hsa-chr5_14497-s	91	GPR45	ENSG00000135973			1	1
hsa-chr5_14497-s	91	MYSM1	ENSG00000162601	1	1	1	1
hsa-chr5_14497-s	91	WASL	ENSG00000106299		1		1
hsa-chr5_14497-s	91	MIER3	ENSG00000155545	1	1	1	1
hsa-chr5_14497-s	91	LMO3	ENSG00000048540		1		1
hsa-chr5_14497-s	91	CSMD3	ENSG00000164796			1
hsa-chr5_14497-s	91	SCAF11	ENSG00000139218	1	1	1	1
hsa-chr5_14497-s	91	RIMBP2	ENSG00000060709				1
hsa-chr5_14497-s	91	ICK	ENSG00000112144	1	1	1	1
hsa-chr5_14497-s	91	TBC1D8B	ENSG00000133138		1		1
hsa-chr5_14497-s	90	BIRC6	ENSG00000115760		1		1
hsa-chr5_14497-s	90	PCDH8	ENSG00000136099		1
hsa-chr5_14497-s	90	ADAMTS5	ENSG00000154736		1		1
hsa-chr5_14497-s	90	SDC2	ENSG00000169439	1	1	1	1
hsa-chr5_14497-s	90	EBF3	ENSG00000108001	1	1		1
hsa-chr5_14497-s	90	RABEP1	ENSG00000029725	1	1	1	1
hsa-chr5_14497-s	90	TUB	ENSG00000166402		1		1
hsa-chr5_14497-s	89	ANKRD44	ENSG00000065413	1	1	1	1
hsa-chr5_14497-s	89	PTPRA	ENSG00000132670			1
hsa-chr5_14497-s	89	JMY	ENSG00000152409	1	1		1
hsa-chr5_14497-s	89	GSKIP	ENSG00000100744		1
hsa-chr5_14497-s	89	MTMR6	ENSG00000139505	1	1	1	1
hsa-chr5_14497-s	89	UBE2Q2	ENSG00000140367		1		1
hsa-chr5_14497-s	89	NCAN	ENSG00000130287		1	1	1
hsa-chr5_14497-s	89	NRXN1	ENSG00000179915		1	1	1
hsa-chr5_14497-s	88	DNAJC13	ENSG00000138246		1
hsa-chr5_14497-s	88	CDC42SE2	ENSG00000158985		1		1
hsa-chr5_14497-s	88	VPS13C	ENSG00000129003	1	1	1	1
hsa-chr5_14497-s	88	MSL2	ENSG00000174579		1		1
hsa-chr5_14497-s	88	ARL5B	ENSG00000165997		1	1	1
hsa-chr5_14497-s	88	NPY1R	ENSG00000164128				1
hsa-chr5_14497-s	88	PLXDC2	ENSG00000120594		1
hsa-chr5_14497-s	88	LPIN1	ENSG00000134324		1	1	1
hsa-chr5_14497-s	87	HAPLN1	ENSG00000145681	1	1	1	1
hsa-chr5_14497-s	87	USP34	ENSG00000115464		1		1
hsa-chr5_14497-s	87	NUP50	ENSG00000093000	1	1	1	1
hsa-chr5_14497-s	87	CHST3	ENSG00000122863				1
hsa-chr5_14497-s	87	LARP4B	ENSG00000107929			1	1
hsa-chr5_14497-s	87	KIF13A	ENSG00000137177				1
hsa-chr5_14497-s	87	PAG1	ENSG00000076641	1	1	1	1
hsa-chr5_14497-s	87	STAM2	ENSG00000115145			1	1
hsa-chr5_14497-s	87	MLLT3	ENSG00000171843	1	1		1
hsa-chr5_14497-s	87	TMPO	ENSG00000120802			1	1
hsa-chr5_14497-s	87	PTP4A1	ENSG00000112245	1	1		1
hsa-chr5_14497-s	86	KIF21B	ENSG00000116852	1	1
hsa-chr5_14497-s	86	MACC1	ENSG00000183742				1
hsa-chr5_14497-s	86	MDGA1	ENSG00000112139		1
hsa-chr5_14497-s	86	SLC12A2	ENSG00000064651		1		1
hsa-chr5_14497-s	86	EXD2	ENSG00000081177	1	1	1	1
hsa-chr5_14497-s	86	WNT2B	ENSG00000134245		1
hsa-chr5_14497-s	86	PIK3C2A	ENSG00000011405		1		1
hsa-chr5_14497-s	86	SHMT1	ENSG00000176974		1		1
hsa-chr5_14497-s	86	LRCH1	ENSG00000136141	1	1	1	1
hsa-chr5_14497-s	85	OLFM3	ENSG00000118733		1	1	1
hsa-chr5_14497-s	85	CHM	ENSG00000188419		1	1	1
hsa-chr5_14497-s	85	SEMA6A	ENSG00000092421	1		1	1
hsa-chr5_14497-s	85	KALRN	ENSG00000160145	1	1	1	1
hsa-chr5_14497-s	85	SYNE1	ENSG00000131018		1
hsa-chr5_14497-s	85	DCBLD2	ENSG00000057019	1	1	1	1
hsa-chr5_14497-s	85	MFAP3	ENSG00000037749			1	1
hsa-chr5_14497-s	85	SFMBT1	ENSG00000163935		1		1
hsa-chr5_14497-s	85	CDH8	ENSG00000150394	1	1	1	1
hsa-chr5_14497-s	85	GTPBP10	ENSG00000105793		1	1	1
hsa-chr5_14497-s	84	GPR132	ENSG00000183484				1
hsa-chr5_14497-s	84	RABGAP1L	ENSG00000152061	1
hsa-chr5_14497-s	84	CARMIL1	ENSG00000079691	1		1	1
hsa-chr5_14497-s	84	SHC4	ENSG00000185634	1	1	1	1
hsa-chr5_14497-s	84	SPAG9	ENSG00000008294		1		1
hsa-chr5_14497-s	84	FANCI	ENSG00000140525		1
hsa-chr5_14497-s	84	ZFYVE26	ENSG00000072121		1		1
hsa-chr5_14497-s	84	DAAM1	ENSG00000100592	1	1		1
hsa-chr5_14497-s	84	MBNL1	ENSG00000152601	1	1	1	1
hsa-chr5_14497-s	83	ATXN2	ENSG00000204842		1
hsa-chr5_14497-s	83	KCTD16	ENSG00000183775	1	1	1	1
hsa-chr5_14497-s	83	TNC	ENSG00000041982	1	1
hsa-chr5_14497-s	83	LASP1	ENSG00000002834	1	1	1	1
hsa-chr5_14497-s	83	SPRED2	ENSG00000198369	1	1	1	1
hsa-chr5_14497-s	83	VAMP7	ENSG00000124333	1	1	1	1
hsa-chr5_14497-s	83	ITPR2	ENSG00000123104	1	1	1	1
hsa-chr5_14497-s	83	TCF12	ENSG00000140262	1	1		1
hsa-chr5_14497-s	83	TACC1	ENSG00000147526	1	1	1	1
hsa-chr5_14497-s	83	MAN2A1	ENSG00000112893	1		1
hsa-chr5_14497-s	83	MINDY2	ENSG00000128923		1	1	1
hsa-chr5_14497-s	82	MRVI1	ENSG00000072952	1		1	1
hsa-chr5_14497-s	82	PRG4	ENSG00000116690	1		1
hsa-chr5_14497-s	82	BCAT1	ENSG00000060982		1	1	1
hsa-chr5_14497-s	82	NFATC3	ENSG00000072736	1	1	1	1
hsa-chr5_14497-s	82	EPHA5	ENSG00000145242		1		1
hsa-chr5_14497-s	82	XPO5	ENSG00000124571		1	1	1
hsa-chr5_14497-s	82	MAPK10	ENSG00000109339	1	1	1	1
hsa-chr5_14497-s	82	RNF41	ENSG00000181852	1	1		1
hsa-chr5_14497-s	82	PEX5L	ENSG00000114757		1		1
hsa-chr5_14497-s	82	PPP1CB	ENSG00000213639	1	1	1	1
hsa-chr5_14497-s	82	NPAS2	ENSG00000170485	1	1	1	1
hsa-chr5_14497-s	81	SLC24A4	ENSG00000140090	1	1
hsa-chr5_14497-s	81	KCNB1	ENSG00000158445		1		1
hsa-chr5_14497-s	81	RET	ENSG00000165731	1	1	1	1
hsa-chr5_14497-s	81	SLC18A2	ENSG00000165646	1		1	1
hsa-chr5_14497-s	81	LOX	ENSG00000113083	1	1	1	1
hsa-chr5_14497-s	81	SSPN	ENSG00000123096		1		1
hsa-chr5_14497-s	81	TMEM150C	ENSG00000249242			1
hsa-chr5_14497-s	81	SIK2	ENSG00000170145	1		1	1
hsa-chr5_14497-s	81	DNAL1	ENSG00000119661		1	1	1
hsa-chr5_14497-s	81	IKBKB	ENSG00000104365		1		1
hsa-chr5_14497-s	81	SAMD12	ENSG00000177570		1	1	1
hsa-chr5_14497-s	81	GRIK2	ENSG00000164418	1	1	1
hsa-chr5_14497-s	81	SEC61A1	ENSG00000058262	1	1	1	1
hsa-chr5_14497-s	81	FAM3C	ENSG00000196937		1		1
hsa-chr5_14497-s	81	CPNE8	ENSG00000139117		1		1
hsa-chr5_14497-s	81	SLC8A1	ENSG00000183023	1	1	1	1
hsa-chr9_24118-m	100	CELSR2	ENSG00000143126		1		1
hsa-chr9_24118-m	100	ETNK1	ENSG00000139163		1		1
hsa-chr9_24118-m	100	KLHL3	ENSG00000146021		1		1
hsa-chr9_24118-m	99	SERPINE2	ENSG00000135919		1
hsa-chr9_24118-m	99	ADAMTSL3	ENSG00000156218	1	1		1
hsa-chr9_24118-m	99	ACVR2A	ENSG00000121989	1	1	1	1
hsa-chr9_24118-m	99	LRP2	ENSG00000081479		1		1
hsa-chr9_24118-m	98	KIAA0319L	ENSG00000142687	1	1	1	1
hsa-chr9_24118-m	98	ZHX1	ENSG00000165156		1	1	1
hsa-chr9_24118-m	98	NOVA1	ENSG00000139910	1	1	1	1
hsa-chr9_24118-m	98	MAP3K4	ENSG00000085511		1		1
hsa-chr9_24118-m	98	FAM110C	ENSG00000184731	1	1	1	1
hsa-chr9_24118-m	98	COL4A5	ENSG00000188153	1	1	1	1
hsa-chr9_24118-m	97	KDM5A	ENSG00000073614	1		1	1
hsa-chr9_24118-m	97	PSD2	ENSG00000146005		1		1
hsa-chr9_24118-m	97	LIN28B	ENSG00000187772				1
hsa-chr9_24118-m	97	ITGA3	ENSG00000005884				1
hsa-chr9_24118-m	97	G3BP2	ENSG00000138757	1	1	1
hsa-chr9_24118-m	96	NLK	ENSG00000087095	1	1	1	1
hsa-chr9_24118-m	96	CHMP5	ENSG00000086065	1	1
hsa-chr9_24118-m	95	KDM6A	ENSG00000147050	1		1
hsa-chr9_24118-m	95	NID2	ENSG00000087303		1
hsa-chr9_24118-m	95	CD2AP	ENSG00000198087	1	1		1
hsa-chr9_24118-m	95	RB1	ENSG00000139687	1	1	1	1
hsa-chr9_24118-m	95	NAA25	ENSG00000111300	1	1	1	1
hsa-chr9_24118-m	95	C9orf40	ENSG00000135045	1	1	1	1
hsa-chr9_24118-m	94	RPS6KA6	ENSG00000072133		1	1	1
hsa-chr9_24118-m	94	SH3GLB1	ENSG00000097033		1
hsa-chr9_24118-m	94	CDK17	ENSG00000059758	1	1	1	1
hsa-chr9_24118-m	94	MCFD2	ENSG00000180398	1	1		1
hsa-chr9_24118-m	94	APLP2	ENSG00000084234	1		1
hsa-chr9_24118-m	94	PPP2R2A	ENSG00000221914		1		1
hsa-chr9_24118-m	94	TENM1	ENSG00000009694		1		1
hsa-chr9_24118-m	93	FUBP1	ENSG00000162613	1	1	1
hsa-chr9_24118-m	93	PRPF40A	ENSG00000196504	1	1	1	1
hsa-chr9_24118-m	93	CXADR	ENSG00000154639		1		1
hsa-chr9_24118-m	93	PPP2R5E	ENSG00000154001	1	1		1
hsa-chr9_24118-m	93	TPPP	ENSG00000171368		1		1
hsa-chr9_24118-m	92	NEDD4	ENSG00000069869	1	1	1	1
hsa-chr9_24118-m	92	SEMA3A	ENSG00000075213	1	1	1	1
hsa-chr9_24118-m	92	SLC24A2	ENSG00000155886	1	1		1
hsa-chr9_24118-m	91	SCD	ENSG00000099194	1		1
hsa-chr9_24118-m	91	PDGFRA	ENSG00000134853	1	1	1	1
hsa-chr9_24118-m	91	CEP85L	ENSG00000111860	1	1	1	1
hsa-chr9_24118-m	91	MAP3K1	ENSG00000095015	1	1	1	1
hsa-chr9_24118-m	91	ZBTB18	ENSG00000179456		1		1
hsa-chr9_24118-m	91	CPEB4	ENSG00000113742	1	1		1
hsa-chr9_24118-m	91	SDC2	ENSG00000169439	1	1	1	1
hsa-chr9_24118-m	90	CCDC85C	ENSG00000205476		1		1
hsa-chr9_24118-m	90	ASAP2	ENSG00000151693		1	1	1
hsa-chr9_24118-m	90	ARHGEF3	ENSG00000163947		1	1	1
hsa-chr9_24118-m	90	SUMO3	ENSG00000184900		1	1	1
hsa-chr9_24118-m	89	MAP3K5	ENSG00000197442		1
hsa-chr9_24118-m	89	EMC1	ENSG00000127463				1
hsa-chr9_24118-m	89	CYB5R4	ENSG00000065615	1
hsa-chr9_24118-m	89	ASTN1	ENSG00000152092		1		1
hsa-chr9_24118-m	89	CREBRF	ENSG00000164463		1		1
hsa-chr9_24118-m	89	APLF	ENSG00000169621	1	1	1	1
hsa-chr9_24118-m	88	RNGTT	ENSG00000111880	1	1		1
hsa-chr9_24118-m	88	NUFIP2	ENSG00000108256		1		1
hsa-chr9_24118-m	88	MDGA2	ENSG00000139915		1	1	1
hsa-chr9_24118-m	88	PIP5K1B	ENSG00000107242	1	1		1
hsa-chr9_24118-m	88	GORAB	ENSG00000120370	1	1	1	1
hsa-chr9_24118-m	88	ATRX	ENSG00000085224	1		1	1
hsa-chr9_24118-m	88	NXPH1	ENSG00000122584	1	1		1
hsa-chr9_24118-m	87	PNRC1	ENSG00000146278			1
hsa-chr9_24118-m	87	PON2	ENSG00000105854	1	1
hsa-chr9_24118-m	86	WDR7	ENSG00000091157			1	1
hsa-chr9_24118-m	86	FAM199X	ENSG00000123575	1	1	1	1
hsa-chr9_24118-m	86	DNHD1	ENSG00000179532	1		1
hsa-chr9_24118-m	86	NFIA	ENSG00000162599	1	1
hsa-chr9_24118-m	86	GNPTAB	ENSG00000111670			1	1
hsa-chr9_24118-m	86	RAPH1	ENSG00000173166	1	1	1	1
hsa-chr9_24118-m	85	ITGB8	ENSG00000105855	1	1	1	1
hsa-chr9_24118-m	85	WAPL	ENSG00000062650	1	1		1
hsa-chr9_24118-m	85	RAPGEF4	ENSG00000091428		1	1
hsa-chr9_24118-m	85	ADAM10	ENSG00000137845	1	1	1	1
hsa-chr9_24118-m	85	COL12A1	ENSG00000111799	1	1	1	1
hsa-chr9_24118-m	85	FXR1	ENSG00000114416	1	1	1	1
hsa-chr9_24118-m	84	SPIRE1	ENSG00000134278		1		1
hsa-chr9_24118-m	84	SLC39A10	ENSG00000196950		1		1
hsa-chr9_24118-m	82	LRRC1	ENSG00000137269	1	1	1	1
hsa-chr9_24118-m	82	CBLL1	ENSG00000105879	1	1	1	1
hsa-chr9_24118-m	82	PTPN3	ENSG00000070159	1	1	1	1
hsa-chr9_24118-m	82	CISD2	ENSG00000145354	1		1	1
hsa-chr9_24118-m	81	NRBP2	ENSG00000185189			1	1
hsa-chr9_24118-m	81	SP1	ENSG00000185591	1	1	1	1
hsa-chr9_24118-m	81	ATP6V1A	ENSG00000114573			1	1
hsa-chr9_24118-m	81	FN1	ENSG00000115414			1
hsa-chr9_24118-m	81	ANKRD44	ENSG00000065413	1	1	1	1
hsa-chr9_24118-m	81	PPP1R9A	ENSG00000158528				1
hsa-chr9_24118-m	81	GALNT7	ENSG00000109586	1	1	1	1
hsa-chr9_24118-m	81	PTPRZ1	ENSG00000106278		1	1	1
hsa-chrX_20124-m	100	TCF12	ENSG00000140262	1	1		1
hsa-chrX_20124-m	100	GABRA1	ENSG00000022355		1	1	1
hsa-chrX_20124-m	100	PANK3	ENSG00000120137		1		1
hsa-chrX_20124-m	100	CDKN1B	ENSG00000111276	1	1	1	1
hsa-chrX_20124-m	99	HECTD2	ENSG00000165338		1	1	1
hsa-chrX_20124-m	99	RFX7	ENSG00000181827		1		1
hsa-chrX_20124-m	99	KIT	ENSG00000157404		1		1
hsa-chrX_20124-m	98	TMCC1	ENSG00000172765	1	1	1	1
hsa-chrX_20124-m	97	MYBL1	ENSG00000185697		1		1
hsa-chrX_20124-m	97	BICDL1	ENSG00000135127	1	1	1	1
hsa-chrX_20124-m	97	ARF4	ENSG00000168374		1		1
hsa-chrX_20124-m	97	FNDC3A	ENSG00000102531	1	1	1	1
hsa-chrX_20124-m	96	C3orf70	ENSG00000187068		1		1
hsa-chrX_20124-m	95	VAPB	ENSG00000124164			1	1
hsa-chrX_20124-m	94	VASH1	ENSG00000071246		1
hsa-chrX_20124-m	94	SNX4	ENSG00000114520	1	1		1
hsa-chrX_20124-m	94	HIPK1	ENSG00000163349	1	1	1	1
hsa-chrX_20124-m	93	ADAM22	ENSG00000008277		1		1
hsa-chrX_20124-m	93	ANKIB1	ENSG00000001629	1	1	1	1
hsa-chrX_20124-m	93	FMR1	ENSG00000102081	1	1		1
hsa-chrX_20124-m	93	FBXO28	ENSG00000143756	1	1	1	1
hsa-chrX_20124-m	93	DCAF12	ENSG00000198876		1		1
hsa-chrX_20124-m	92	SYBU	ENSG00000147642		1	1
hsa-chrX_20124-m	92	CLVS2	ENSG00000146352		1
hsa-chrX_20124-m	92	CHSY1	ENSG00000131873		1		1
hsa-chrX_20124-m	92	WDR47	ENSG00000085433		1	1	1
hsa-chrX_20124-m	92	MEGF9	ENSG00000106780	1	1	1	1
hsa-chrX_20124-m	92	FERMT2	ENSG00000073712		1
hsa-chrX_20124-m	91	NXPH1	ENSG00000122584	1	1		1
hsa-chrX_20124-m	91	TRPC3	ENSG00000138741		1
hsa-chrX_20124-m	91	AP3B2	ENSG00000103723		1	1
hsa-chrX_20124-m	91	CASZ1	ENSG00000130940	1	1		1
hsa-chrX_20124-m	91	GNAI3	ENSG00000065135		1		1
hsa-chrX_20124-m	91	ETV3	ENSG00000117036		1	1
hsa-chrX_20124-m	91	RAB1A	ENSG00000138069		1		1
hsa-chrX_20124-m	90	KIF16B	ENSG00000089177	1	1	1	1
hsa-chrX_20124-m	90	GALNT3	ENSG00000115339		1		1
hsa-chrX_20124-m	90	RSBN1L	ENSG00000187257		1
hsa-chrX_20124-m	90	DENND1B	ENSG00000213047	1	1	1	1
hsa-chrX_20124-m	90	MYLIP	ENSG00000007944		1		1
hsa-chrX_20124-m	90	PPP3R1	ENSG00000221823	1	1	1	1
hsa-chrX_20124-m	90	FAM214A	ENSG00000047346		1
hsa-chrX_20124-m	90	ZBTB41	ENSG00000177888		1	1	1
hsa-chrX_20124-m	90	MRAP2	ENSG00000135324	1		1	1
hsa-chrX_20124-m	89	ZNF624	ENSG00000197566		1	1	1
hsa-chrX_20124-m	89	PAIP1	ENSG00000172239		1		1
hsa-chrX_20124-m	89	ESR1	ENSG00000091831		1		1
hsa-chrX_20124-m	89	MIDN	ENSG00000167470	1	1	1	1
hsa-chrX_20124-m	88	ARID1A	ENSG00000117713	1	1	1	1
hsa-chrX_20124-m	88	NAA25	ENSG00000111300	1	1	1	1
hsa-chrX_20124-m	88	BRWD3	ENSG00000165288	1	1	1	1
hsa-chrX_20124-m	88	SLC2A13	ENSG00000151229		1	1	1
hsa-chrX_20124-m	88	TLNRD1	ENSG00000140406		1		1
hsa-chrX_20124-m	88	TLE3	ENSG00000140332	1	1	1	1
hsa-chrX_20124-m	88	KMT2A	ENSG00000118058	1	1	1	1
hsa-chrX_20124-m	87	GDF9	ENSG00000164404			1
hsa-chrX_20124-m	87	WDR35	ENSG00000118965	1	1	1	1
hsa-chrX_20124-m	87	DPY19L3	ENSG00000178904		1	1	1
hsa-chrX_20124-m	87	HOOK1	ENSG00000134709		1	1	1
hsa-chrX_20124-m	86	CDK19	ENSG00000155111	1	1	1	1
hsa-chrX_20124-m	86	RIMS3	ENSG00000117016	1	1
hsa-chrX_20124-m	86	CREBL2	ENSG00000111269	1	1	1	1
hsa-chrX_20124-m	86	PLXNC1	ENSG00000136040	1	1	1	1
hsa-chrX_20124-m	86	SNAP29	ENSG00000099940		1	1	1
hsa-chrX_20124-m	85	SUN2	ENSG00000100242		1		1
hsa-chrX_20124-m	85	MCMDC2	ENSG00000178460	1		1	1
hsa-chrX_20124-m	85	DYRK1A	ENSG00000157540	1	1	1	1
hsa-chrX_20124-m	85	KCNQ3	ENSG00000184156	1	1		1
hsa-chrX_20124-m	85	MIA3	ENSG00000154305		1		1
hsa-chrX_20124-m	85	YWHAG	ENSG00000170027		1	1	1
hsa-chrX_20124-m	85	SEC24B	ENSG00000138802			1
hsa-chrX_20124-m	84	EIF3J	ENSG00000104131		1		1
hsa-chrX_20124-m	84	SLC6A4	ENSG00000108576		1	1	1
hsa-chrX_20124-m	84	GABRG1	ENSG00000163285			1	1
hsa-chrX_20124-m	83	PHACTR4	ENSG00000204138	1	1		1
hsa-chrX_20124-m	83	USP6NL	ENSG00000148429	1	1	1	1
hsa-chrX_20124-m	83	CPNE8	ENSG00000139117		1		1
hsa-chrX_20124-m	83	VGLL4	ENSG00000144560	1	1	1	1
hsa-chrX_20124-m	83	TRPS1	ENSG00000104447	1	1	1	1
hsa-chrX_20124-m	83	PIK3R1	ENSG00000145675	1	1	1	1
hsa-chrX_20124-m	83	RIT2	ENSG00000152214		1
hsa-chrX_20124-m	82	ZFPM2	ENSG00000169946	1	1
hsa-chrX_20124-m	82	NAP1L1	ENSG00000187109	1	1	1	1
hsa-chrX_20124-m	82	EIF5A2	ENSG00000163577		1		1
hsa-chrX_20124-m	82	FGF9	ENSG00000102678	1	1	1	1
hsa-chrX_20124-m	82	POGZ	ENSG00000143442	1	1	1	1
hsa-chrX_20124-m	82	NAV3	ENSG00000067798	1	1	1	1
hsa-chrX_20124-m	81	PAFAH1B2	ENSG00000168092		1	1	1
hsa-chrX_20124-m	81	NDST3	ENSG00000164100	1	1	1	1
hsa-chrX_20124-m	81	DCUN1D4	ENSG00000109184		1	1	1
hsa-chrX_20124-m	81	ASB4	ENSG00000005981		1	1	1
hsa-chrX_20124-m	81	CAMTA1	ENSG00000171735	1	1	1	1
hsa-chrX_20124-m	81	PAIP2	ENSG00000120727		1
hsa-chrX_20124-m	81	PITPNM2	ENSG00000090975		1	1	1
hsa-P1-can914-m	100	DICER1	ENSG00000100697		1		1
hsa-P1-can914-m	100	COL4A3BP	ENSG00000113163	1	1	1	1
hsa-P1-can914-m	99	RGL1	ENSG00000143344	1	1	1	1
hsa-P1-can914-m	99	MORC3	ENSG00000159256	1		1	1
hsa-P1-can914-m	99	UBE2E3	ENSG00000170035		1
hsa-P1-can914-m	99	AMMECR1	ENSG00000101935	1	1	1	1
hsa-P1-can914-m	99	ANKRD13A	ENSG00000076513		1	1	1
hsa-P1-can914-m	99	AFF4	ENSG00000072364	1	1	1	1
hsa-P1-can914-m	99	RORA	ENSG00000069667	1	1		1
hsa-P1-can914-m	99	CYBRD1	ENSG00000071967		1		1
hsa-P1-can914-m	98	KLHL24	ENSG00000114796	1	1	1	1
hsa-P1-can914-m	98	ARCN1	ENSG00000095139	1	1	1	1
hsa-P1-can914-m	98	CLCN3	ENSG00000109572	1	1		1
hsa-P1-can914-m	98	RORB	ENSG00000198963		1	1	1
hsa-P1-can914-m	98	ZNF770	ENSG00000198146		1	1	1
hsa-P1-can914-m	98	ADGRG2	ENSG00000173698		1		1
hsa-P1-can914-m	98	UBE2B	ENSG00000119048		1		1
hsa-P1-can914-m	98	CAV2	ENSG00000105971		1		1
hsa-P1-can914-m	97	CHSY1	ENSG00000131873		1		1
hsa-P1-can914-m	97	SMNDC1	ENSG00000119953		1
hsa-P1-can914-m	97	BCL11B	ENSG00000127152		1		1
hsa-P1-can914-m	97	GPM6A	ENSG00000150625	1	1	1	1
hsa-P1-can914-m	97	CAMSAP2	ENSG00000118200		1	1	1
hsa-P1-can914-m	97	SEC23A	ENSG00000100934		1
hsa-P1-can914-m	97	SPICE1	ENSG00000163611	1	1	1	1
hsa-P1-can914-m	96	ZDHHC21	ENSG00000175893		1	1	1
hsa-P1-can914-m	96	DCP2	ENSG00000172795		1		1
hsa-P1-can914-m	96	FAM117B	ENSG00000138439	1	1	1	1
hsa-P1-can914-m	96	TMEM178B	ENSG00000261115	1	1
hsa-P1-can914-m	96	ZNF777	ENSG00000196453		1
hsa-P1-can914-m	95	NFKBIZ	ENSG00000144802		1		1
hsa-P1-can914-m	95	N4BP2	ENSG00000078177	1	1	1	1
hsa-P1-can914-m	95	LIN28B	ENSG00000187772				1
hsa-P1-can914-m	95	PWWP2A	ENSG00000170234		1	1	1
hsa-P1-can914-m	95	CYP4V2	ENSG00000145476	1	1	1	1
hsa-P1-can914-m	95	LCOR	ENSG00000196233	1	1	1	1
hsa-P1-can914-m	95	SNX6	ENSG00000129515		1		1
hsa-P1-can914-m	94	EDEM1	ENSG00000134109	1			1
hsa-P1-can914-m	94	SMG1	ENSG00000157106	1	1	1	1
hsa-P1-can914-m	94	DPY19L1	ENSG00000173852		1		1
hsa-P1-can914-m	94	ZEB1	ENSG00000148516		1	1	1
hsa-P1-can914-m	94	TFRC	ENSG00000072274		1		1
hsa-P1-can914-m	93	ZBTB41	ENSG00000177888		1	1	1
hsa-P1-can914-m	93	MTUS1	ENSG00000129422		1		1
hsa-P1-can914-m	93	ITGAV	ENSG00000138448		1		1
hsa-P1-can914-m	93	C1orf115	ENSG00000162817	1		1	1
hsa-P1-can914-m	93	IDS	ENSG00000010404			1
hsa-P1-can914-m	93	IDE	ENSG00000119912	1		1	1
hsa-P1-can914-m	93	EZR	ENSG00000092820		1		1
hsa-P1-can914-m	92	RAB14	ENSG00000119396		1	1	1
hsa-P1-can914-m	92	TRIB1	ENSG00000173334	1	1	1	1
hsa-P1-can914-m	92	DNAJC6	ENSG00000116675		1		1
hsa-P1-can914-m	92	APPBP2	ENSG00000062725	1	1	1	1
hsa-P1-can914-m	92	FKTN	ENSG00000106692		1	1	1
hsa-P1-can914-m	92	CNOT6L	ENSG00000138767	1	1	1	1
hsa-P1-can914-m	92	PTAR1	ENSG00000188647	1	1	1	1
hsa-P1-can914-m	92	PROX1	ENSG00000117707			1
hsa-P1-can914-m	92	GABPA	ENSG00000154727		1		1
hsa-P1-can914-m	92	NCOA3	ENSG00000124151	1	1	1	1
hsa-P1-can914-m	91	CAP2	ENSG00000112186		1		1
hsa-P1-can914-m	91	INSIG1	ENSG00000186480	1	1		1
hsa-P1-can914-m	91	ANKRD28	ENSG00000206560		1	1	1
hsa-P1-can914-m	91	CTDSPL2	ENSG00000137770		1		1
hsa-P1-can914-m	91	MINDY2	ENSG00000128923		1	1	1
hsa-P1-can914-m	90	STK17B	ENSG00000081320	1	1	1
hsa-P1-can914-m	90	MBNL3	ENSG00000076770		1	1	1
hsa-P1-can914-m	90	YIPF6	ENSG00000181704	1		1	1
hsa-P1-can914-m	90	KPNA3	ENSG00000102753		1		1
hsa-P1-can914-m	90	TMX4	ENSG00000125827			1	1
hsa-P1-can914-m	90	HAUS2	ENSG00000137814		1	1	1
hsa-P1-can914-m	89	BMT2	ENSG00000164603		1
hsa-P1-can914-m	89	ARFGEF3	ENSG00000112379	1	1	1	1
hsa-P1-can914-m	89	STXBP5	ENSG00000164506		1	1	1
hsa-P1-can914-m	88	RPRD1A	ENSG00000141425		1		1
hsa-P1-can914-m	88	ZBTB44	ENSG00000196323		1		1
hsa-P1-can914-m	88	BTN2A1	ENSG00000112763				1
hsa-P1-can914-m	88	MPRIP	ENSG00000133030		1
hsa-P1-can914-m	88	RAB8B	ENSG00000166128				1
hsa-P1-can914-m	88	RPS6KB1	ENSG00000108443	1	1	1	1
hsa-P1-can914-m	88	RASSF3	ENSG00000153179	1	1	1	1
hsa-P1-can914-m	88	RRP1B	ENSG00000160208		1		1
hsa-P1-can914-m	88	MCU	ENSG00000156026	1	1	1	1
hsa-P1-can914-m	88	CELF2	ENSG00000048740	1	1		1
hsa-P1-can914-m	88	EDIL3	ENSG00000164176	1	1	1
hsa-P1-can914-m	87	CHL1	ENSG00000134121	1	1	1	1
hsa-P1-can914-m	87	SLC35F5	ENSG00000115084		1		1
hsa-P1-can914-m	87	IRF2BP2	ENSG00000168264		1		1
hsa-P1-can914-m	87	PTER	ENSG00000165983	1	1	1	1
hsa-P1-can914-m	86	HELZ	ENSG00000198265		1		1
hsa-P1-can914-m	86	SORT1	ENSG00000134243		1		1
hsa-P1-can914-m	86	DENND1B	ENSG00000213047	1	1	1	1
hsa-P1-can914-m	85	HPCAL4	ENSG00000116983	1	1	1	1
hsa-P1-can914-m	85	MEIS2	ENSG00000134138	1	1		1
hsa-P1-can914-m	85	HAUS6	ENSG00000147874		1	1	1
hsa-P1-can914-m	85	C6orf89	ENSG00000198663	1		1
hsa-P1-can914-m	85	CD81	ENSG00000110651		1
hsa-P1-can914-m	84	CACNB4	ENSG00000182389	1	1	1	1
hsa-P1-can914-m	84	MAGI3	ENSG00000081026	1		1	1
hsa-P1-can914-m	84	SUCO	ENSG00000094975	1	1	1	1
hsa-P1-can914-m	84	SYT4	ENSG00000132872		1	1	1
hsa-P1-can914-m	83	SH3BGRL	ENSG00000131171				1
hsa-P1-can914-m	83	STX12	ENSG00000117758	1		1
hsa-P1-can914-m	83	PTPN12	ENSG00000127947		1		1
hsa-P1-can914-m	83	SEMA3C	ENSG00000075223	1		1	1
hsa-P1-can914-m	83	CDH2	ENSG00000170558		1		1
hsa-P1-can914-m	83	TNRC6C	ENSG00000078687	1	1	1	1
hsa-P1-can914-m	82	NDUFV3	ENSG00000160194		1		1
hsa-P1-can914-m	82	PELI2	ENSG00000139946	1	1		1
hsa-P1-can914-m	82	CIT	ENSG00000122966		1		1
hsa-P1-can914-m	82	UNC80	ENSG00000144406	1	1	1	1
hsa-P1-can914-m	82	ZBTB43	ENSG00000169155		1		1
hsa-P1-can914-m	82	ZHX2	ENSG00000178764	1	1	1	1
hsa-P1-can914-m	82	TAOK1	ENSG00000160551		1		1
hsa-P1-can914-m	82	KLF11	ENSG00000172059		1		1
hsa-P1-can914-m	81	ADAM12	ENSG00000148848	1		1	1
hsa-P1-can914-m	81	TET3	ENSG00000187605		1		1
hsa-P1-can914-m	81	YTHDF3	ENSG00000185728		1		1
hsa-P1-can914-m	81	ZNF385B	ENSG00000144331			1
hsa-P1-can914-m	81	EFCAB14	ENSG00000159658	1	1	1	1
hsa-P1-can914-m	81	PICALM	ENSG00000073921		1		1
hsa-P2-can246-m	100	LSAMP	ENSG00000185565		1	1	1
hsa-P2-can246-m	100	CDK6	ENSG00000105810		1		1
hsa-P2-can246-m	100	EPS8	ENSG00000151491	1	1	1	1
hsa-P2-can246-m	100	KLHL5	ENSG00000109790	1	1	1	1
hsa-P2-can246-m	100	KCNT2	ENSG00000162687	1		1	1
hsa-P2-can246-m	100	POU2F2	ENSG00000028277		1		1
hsa-P2-can246-m	100	ADAM10	ENSG00000137845	1	1	1	1
hsa-P2-can246-m	100	PPP3CA	ENSG00000138814	1	1	1	1
hsa-P2-can246-m	100	FOXN3	ENSG00000053254	1	1	1	1
hsa-P2-can246-m	100	RBMS3	ENSG00000144642		1	1	1
hsa-P2-can246-m	100	USP37	ENSG00000135913		1		1
hsa-P2-can246-m	99	KLHL24	ENSG00000114796	1	1	1	1
hsa-P2-can246-m	99	TBL1XR1	ENSG00000177565	1	1	1	1
hsa-P2-can246-m	99	KMT2A	ENSG00000118058	1	1	1	1
hsa-P2-can246-m	99	KAT6A	ENSG00000083168	1	1	1	1
hsa-P2-can246-m	99	PPM1L	ENSG00000163590		1		1
hsa-P2-can246-m	99	PPFIA1	ENSG00000131626	1	1		1
hsa-P2-can246-m	99	RPS6KA6	ENSG00000072133		1	1	1
hsa-P2-can246-m	99	RSBN1	ENSG00000081019	1	1	1	1
hsa-P2-can246-m	99	RDH12	ENSG00000139988	1
hsa-P2-can246-m	99	SMAD5	ENSG00000113658	1	1	1	1
hsa-P2-can246-m	99	MBNL3	ENSG00000076770		1	1	1
hsa-P2-can246-m	99	ZBTB1	ENSG00000126804	1	1	1	1
hsa-P2-can246-m	99	RAB27B	ENSG00000041353				1
hsa-P2-can246-m	99	ZBTB38	ENSG00000177311		1	1	1
hsa-P2-can246-m	99	ZBTB6	ENSG00000186130	1	1	1	1
hsa-P2-can246-m	99	ARHGAP6	ENSG00000047648			1
hsa-P2-can246-m	99	PIP5K1B	ENSG00000107242	1	1		1
hsa-P2-can246-m	99	NFXL1	ENSG00000170448	1
hsa-P2-can246-m	99	PLXNA2	ENSG00000076356		1	1	1
hsa-P2-can246-m	99	CNOT6L	ENSG00000138767	1	1	1	1
hsa-P2-can246-m	99	ABCC9	ENSG00000069431				1
hsa-P2-can246-m	99	MAGI3	ENSG00000081026	1		1	1
hsa-P2-can246-m	99	CALN1	ENSG00000183166		1
hsa-P2-can246-m	99	N4BP2	ENSG00000078177	1	1	1	1
hsa-P2-can246-m	99	KLHL28	ENSG00000179454	1	1	1	1
hsa-P2-can246-m	99	APBB2	ENSG00000163697	1	1	1	1
hsa-P2-can246-m	99	SEPT11	ENSG00000138758		1	1	1
hsa-P2-can246-m	99	SPIRE1	ENSG00000134278		1		1
hsa-P2-can246-m	98	ZC3H12C	ENSG00000149289	1	1	1	1
hsa-P2-can246-m	98	PPIL1	ENSG00000137168	1		1	1
hsa-P2-can246-m	98	TRPS1	ENSG00000104447	1	1	1	1
hsa-P2-can246-m	98	DLG3	ENSG00000082458	1		1	1
hsa-P2-can246-m	98	MEGF10	ENSG00000145794	1		1	1
hsa-P2-can246-m	98	MEGF9	ENSG00000106780	1	1	1	1
hsa-P2-can246-m	98	MAF	ENSG00000178573		1		1
hsa-P2-can246-m	98	CLEC16A	ENSG00000038532	1
hsa-P2-can246-m	98	ITPR2	ENSG00000123104	1	1	1	1
hsa-P2-can246-m	98	ZFP36L1	ENSG00000185650		1	1	1
hsa-P2-can246-m	98	KIF5B	ENSG00000170759	1	1	1	1
hsa-P2-can246-m	98	PCSK2	ENSG00000125851	1	1	1	1
hsa-P2-can246-m	98	MYRIP	ENSG00000170011	1	1	1	1
hsa-P2-can246-m	98	GCNT1	ENSG00000187210	1		1	1
hsa-P2-can246-m	98	DESI2	ENSG00000121644	1		1	1
hsa-P2-can246-m	98	YWHAG	ENSG00000170027		1	1	1
hsa-P2-can246-m	98	ENC1	ENSG00000171617	1	1	1	1
hsa-P2-can246-m	98	JADE2	ENSG00000043143	1	1	1	1
hsa-P2-can246-m	98	PAPPA	ENSG00000182752		1		1
hsa-P2-can246-m	98	CNR1	ENSG00000118432	1	1		1
hsa-P2-can246-m	97	CDON	ENSG00000064309	1	1		1
hsa-P2-can246-m	97	MAP1B	ENSG00000131711		1	1	1
hsa-P2-can246-m	97	GDA	ENSG00000119125	1	1	1	1
hsa-P2-can246-m	97	CPSF7	ENSG00000149532			1	1
hsa-P2-can246-m	97	VANGL1	ENSG00000173218	1	1		1
hsa-P2-can246-m	97	STRBP	ENSG00000165209	1		1	1
hsa-P2-can246-m	97	SLC38A1	ENSG00000111371	1		1	1
hsa-P2-can246-m	97	LTN1	ENSG00000198862	1	1		1
hsa-P2-can246-m	97	ZKSCAN1	ENSG00000106261	1	1	1	1
hsa-P2-can246-m	97	COL4A3BP	ENSG00000113163	1	1	1	1
hsa-P2-can246-m	97	SLC18A2	ENSG00000165646	1		1	1
hsa-P2-can246-m	97	HMGB2	ENSG00000164104	1	1	1	1
hsa-P2-can246-m	97	SLC4A4	ENSG00000080493		1	1	1
hsa-P2-can246-m	96	ZMYND11	ENSG00000015171		1	1	1
hsa-P2-can246-m	96	VEZF1	ENSG00000136451	1	1		1
hsa-P2-can246-m	96	OSBP	ENSG00000110048	1		1	1
hsa-P2-can246-m	96	TACC1	ENSG00000147526	1	1	1	1
hsa-P2-can246-m	96	DNAJC27	ENSG00000115137	1	1	1	1
hsa-P2-can246-m	96	FYB2	ENSG00000187889	1	1
hsa-P2-can246-m	96	NEK9	ENSG00000119638		1	1	1
hsa-P2-can246-m	96	IDE	ENSG00000119912	1		1	1
hsa-P2-can246-m	96	SLC8A3	ENSG00000100678	1	1	1	1
hsa-P2-can246-m	96	SNX18	ENSG00000178996		1	1	1
hsa-P2-can246-m	96	SNX27	ENSG00000143376	1		1
hsa-P2-can246-m	96	SH3PXD2A	ENSG00000107957	1
hsa-P2-can246-m	96	SPTLC2	ENSG00000100596		1		1
hsa-P2-can246-m	95	BCL11A	ENSG00000119866		1	1	1
hsa-P2-can246-m	95	PLAGL2	ENSG00000126003	1	1		1
hsa-P2-can246-m	95	MAGT1	ENSG00000102158			1	1
hsa-P2-can246-m	95	GALNT7	ENSG00000109586	1	1	1	1
hsa-P2-can246-m	95	TMEM33	ENSG00000109133	1	1		1
hsa-P2-can246-m	95	PITPNC1	ENSG00000154217	1		1
hsa-P2-can246-m	95	UHMK1	ENSG00000152332		1		1
hsa-P2-can246-m	95	ZMYND8	ENSG00000101040		1		1
hsa-P2-can246-m	95	CUL3	ENSG00000036257	1	1	1	1
hsa-P2-can246-m	95	BEGAIN	ENSG00000183092	1
hsa-P2-can246-m	95	ATG2B	ENSG00000066739	1	1		1
hsa-P2-can246-m	95	AFF1	ENSG00000172493	1	1	1	1
hsa-P2-can246-m	95	ZNF117	ENSG00000152926			1	1
hsa-P2-can246-m	95	PAM	ENSG00000145730		1	1	1
hsa-P2-can246-m	94	DTWD2	ENSG00000169570			1	1
hsa-P2-can246-m	94	KLHL29	ENSG00000119771		1		1
hsa-P2-can246-m	94	CCDC141	ENSG00000163492	1			1
hsa-P2-can246-m	94	PTPRB	ENSG00000127329		1	1	1
hsa-P2-can246-m	94	YPEL2	ENSG00000175155	1	1	1	1
hsa-P2-can246-m	94	SBNO1	ENSG00000139697	1	1
hsa-P2-can246-m	94	SH3KBP1	ENSG00000147010	1		1	1
hsa-P2-can246-m	94	PDE4D	ENSG00000113448	1	1	1	1
hsa-P2-can246-m	94	SAE1	ENSG00000142230			1	1
hsa-P2-can246-m	94	PIK3R1	ENSG00000145675	1	1	1	1
hsa-P2-can246-m	94	SLC38A2	ENSG00000134294	1	1	1	1
hsa-P2-can246-m	94	ADAMTS6	ENSG00000049192		1	1	1
hsa-P2-can246-m	94	AMIGO1	ENSG00000181754	1	1	1
hsa-P2-can246-m	94	DIP2C	ENSG00000151240	1	1	1	1
hsa-P2-can246-m	94	PTBP3	ENSG00000119314		1	1	1
hsa-P2-can246-m	94	RHOQ	ENSG00000119729		1	1	1
hsa-P2-can246-m	93	PLXDC2	ENSG00000120594		1
hsa-P2-can246-m	93	PRTG	ENSG00000166450		1	1	1
hsa-P2-can246-m	93	SP3	ENSG00000172845	1	1	1	1
hsa-P2-can246-m	93	SLC7A11	ENSG00000151012		1	1	1
hsa-P2-can246-m	93	HPCAL4	ENSG00000116983	1	1	1	1
hsa-P2-can246-m	93	STXBP5L	ENSG00000145087	1	1	1	1
hsa-P2-can246-m	93	ASH1L	ENSG00000116539	1	1	1	1
hsa-P2-can246-m	93	KCNK2	ENSG00000082482		1	1	1
hsa-P2-can246-m	93	FOXO3	ENSG00000118689	1	1		1
hsa-P2-can246-m	93	GNA13	ENSG00000120063		1		1
hsa-P2-can246-m	93	ZNF493	ENSG00000196268	1		1	1
hsa-P2-can246-m	93	CDCP1	ENSG00000163814		1		1
hsa-P2-can246-m	93	TOMM40L	ENSG00000158882	1	1	1
hsa-P2-can246-m	93	CCDC14	ENSG00000175455	1	1	1	1
hsa-P2-can246-m	93	SHISA9	ENSG00000237515	1	1	1	1
hsa-P2-can246-m	93	SLAIN2	ENSG00000109171	1	1	1	1
hsa-P2-can246-m	93	SPTSSB	ENSG00000196542		1	1	1
hsa-P2-can246-m	92	HIC2	ENSG00000169635	1
hsa-P2-can246-m	92	NFIX	ENSG00000008441	1	1		1
hsa-P2-can246-m	92	ZDHHC21	ENSG00000175893		1	1	1
hsa-P2-can246-m	92	LRP8	ENSG00000157193	1	1	1	1
hsa-P2-can246-m	92	DCX	ENSG00000077279	1	1	1
hsa-P2-can246-m	92	RAPH1	ENSG00000173166	1	1	1	1
hsa-P2-can246-m	92	CELF4	ENSG00000101489	1	1	1	1
hsa-P2-can246-m	92	MERTK	ENSG00000153208		1	1
hsa-P2-can246-m	92	NAV2	ENSG00000166833	1	1	1	1
hsa-P2-can246-m	92	MSI2	ENSG00000153944	1	1		1
hsa-P2-can246-m	92	PHLPP1	ENSG00000081913	1	1		1
hsa-P2-can246-m	92	SLC5A12	ENSG00000148942		1	1	1
hsa-P2-can246-m	92	ATP8A1	ENSG00000124406		1		1
hsa-P2-can246-m	92	STXBP6	ENSG00000168952	1
hsa-P2-can246-m	92	MARCH4	ENSG00000144583	1	1	1
hsa-P2-can246-m	92	FAM20B	ENSG00000116199	1		1
hsa-P2-can246-m	92	ALKBH8	ENSG00000137760	1	1	1	1
hsa-P2-can246-m	92	SEC62	ENSG00000008952	1	1	1	1
hsa-P2-can246-m	92	ZNF763	ENSG00000197054	1		1
hsa-P2-can246-m	92	CREG1	ENSG00000143162	1	1	1	1
hsa-P2-can246-m	92	EP300	ENSG00000100393	1		1
hsa-P2-can246-m	91	ATP2B1	ENSG00000070961	1	1	1	1
hsa-P2-can246-m	91	BOD1L1	ENSG00000038219	1	1		1
hsa-P2-can246-m	91	PLPP3	ENSG00000162407	1	1	1	1
hsa-P2-can246-m	91	ZNF148	ENSG00000163848	1	1	1	1
hsa-P2-can246-m	91	TRAK2	ENSG00000115993	1	1	1	1
hsa-P2-can246-m	91	RTN4RL1	ENSG00000185924	1	1		1
hsa-P2-can246-m	91	FLT1	ENSG00000102755	1		1	1
hsa-P2-can246-m	91	RTN1	ENSG00000139970	1
hsa-P2-can246-m	91	RIMBP2	ENSG00000060709				1
hsa-P2-can246-m	91	GPR158	ENSG00000151025		1		1
hsa-P2-can246-m	91	ANO3	ENSG00000134343	1	1	1	1
hsa-P2-can246-m	91	ZC3HAV1	ENSG00000105939			1	1
hsa-P2-can246-m	91	SLC39A8	ENSG00000138821	1	1	1	1
hsa-P2-can246-m	90	GNAI2	ENSG00000114353	1	1
hsa-P2-can246-m	90	ATE1	ENSG00000107669			1
hsa-P2-can246-m	90	EYA3	ENSG00000158161	1	1	1	1
hsa-P2-can246-m	90	KCNA4	ENSG00000182255		1
hsa-P2-can246-m	90	TRIM8	ENSG00000171206	1	1	1	1
hsa-P2-can246-m	90	RAB11B	ENSG00000185236	1	1	1
hsa-P2-can246-m	90	RAB8B	ENSG00000166128				1
hsa-P2-can246-m	90	CCDC88A	ENSG00000115355	1	1	1	1
hsa-P2-can246-m	90	CASK	ENSG00000147044		1
hsa-P2-can246-m	90	LACC1	ENSG00000179630	1	1	1	1
hsa-P2-can246-m	90	SERTAD2	ENSG00000179833			1	1
hsa-P2-can246-m	90	PARD3B	ENSG00000116117	1		1	1
hsa-P2-can246-m	90	TLL2	ENSG00000095587	1	1	1	1
hsa-P2-can246-m	90	KREMEN1	ENSG00000183762	1	1	1	1
hsa-P2-can246-m	90	CFAP97	ENSG00000164323	1	1		1
hsa-P2-can246-m	90	DPY19L4	ENSG00000156162		1	1	1
hsa-P2-can246-m	90	C11orf58	ENSG00000110696	1		1	1
hsa-P2-can246-m	90	ACOX1	ENSG00000161533	1	1	1	1
hsa-P2-can246-m	90	ARFGEF3	ENSG00000112379	1	1	1	1
hsa-P2-can246-m	90	FAM78A	ENSG00000126882	1	1		1
hsa-P2-can246-m	89	SGSM1	ENSG00000167037	1	1	1	1
hsa-P2-can246-m	89	PRSS35	ENSG00000146250			1	1
hsa-P2-can246-m	89	DIXDC1	ENSG00000150764	1	1	1	1
hsa-P2-can246-m	89	TMEM170B	ENSG00000205269	1	1	1	1
hsa-P2-can246-m	89	DCLRE1C	ENSG00000152457			1	1
hsa-P2-can246-m	89	SLC44A1	ENSG00000070214	1	1	1	1
hsa-P2-can246-m	89	EPHA7	ENSG00000135333		1		1
hsa-P2-can246-m	89	CPEB4	ENSG00000113742	1	1		1
hsa-P2-can246-m	89	CERS6	ENSG00000172292		1		1
hsa-P2-can246-m	89	KPNA6	ENSG00000025800	1	1		1
hsa-P2-can246-m	89	PCDH17	ENSG00000118946	1	1	1	1
hsa-P2-can246-m	88	OLFML2A	ENSG00000185585	1
hsa-P2-can246-m	88	SIDT1	ENSG00000072858		1	1	1
hsa-P2-can246-m	88	ZNF195	ENSG00000005801			1	1
hsa-P2-can246-m	88	BMP2K	ENSG00000138756		1		1
hsa-P2-can246-m	88	FBXO11	ENSG00000138081	1	1	1	1
hsa-P2-can246-m	88	IL17RD	ENSG00000144730		1
hsa-P2-can246-m	88	CACNG2	ENSG00000166862	1	1	1	1
hsa-P2-can246-m	88	SLC4A8	ENSG00000050438	1	1	1	1
hsa-P2-can246-m	88	TMTC1	ENSG00000133687	1	1	1	1
hsa-P2-can246-m	88	THBS1	ENSG00000137801		1	1	1
hsa-P2-can246-m	88	TRIB1	ENSG00000173334	1	1	1	1
hsa-P2-can246-m	88	CPM	ENSG00000135678	1		1	1
hsa-P2-can246-m	88	NFATC3	ENSG00000072736	1	1	1	1
hsa-P2-can246-m	87	ZNF28	ENSG00000198538			1	1
hsa-P2-can246-m	87	MICU3	ENSG00000155970			1
hsa-P2-can246-m	87	HHIP	ENSG00000164161		1
hsa-P2-can246-m	87	PHIP	ENSG00000146247		1		1
hsa-P2-can246-m	87	DNMT3A	ENSG00000119772	1	1	1
hsa-P2-can246-m	87	PDE7A	ENSG00000205268	1	1	1	1
hsa-P2-can246-m	87	ZNF302	ENSG00000089335	1	1		1
hsa-P2-can246-m	87	UTRN	ENSG00000152818	1	1		1
hsa-P2-can246-m	87	YPEL1	ENSG00000100027		1	1	1
hsa-P2-can246-m	86	PPIL6	ENSG00000185250	1	1		1
hsa-P2-can246-m	86	KDM5A	ENSG00000073614	1		1	1
hsa-P2-can246-m	86	ZNF655	ENSG00000197343		1	1	1
hsa-P2-can246-m	86	UBE2QL1	ENSG00000215218	1			1
hsa-P2-can246-m	86	PTBP1	ENSG00000011304	1	1		1
hsa-P2-can246-m	86	KDELC2	ENSG00000178202	1		1	1
hsa-P2-can246-m	86	DAZAP1	ENSG00000071626	1	1	1
hsa-P2-can246-m	86	MEX3A	ENSG00000254726	1	1	1	1
hsa-P2-can246-m	86	SPHKAP	ENSG00000153820	1	1	1	1
hsa-P2-can246-m	86	CCDC117	ENSG00000159873			1	1
hsa-P2-can246-m	86	SOBP	ENSG00000112320		1	1	1
hsa-P2-can246-m	86	CACNB1	ENSG00000067191				1
hsa-P2-can246-m	85	LYSMD3	ENSG00000176018		1		1
hsa-P2-can246-m	85	ESRRG	ENSG00000196482	1	1	1	1
hsa-P2-can246-m	85	TET1	ENSG00000138336	1	1	1	1
hsa-P2-can246-m	85	KIAA1328	ENSG00000150477			1	1
hsa-P2-can246-m	85	TPPP	ENSG00000171368		1		1
hsa-P2-can246-m	85	SIX4	ENSG00000100625	1	1	1	1
hsa-P2-can246-m	85	KALRN	ENSG00000160145	1	1	1	1
hsa-P2-can246-m	85	TAF11	ENSG00000064995				1
hsa-P2-can246-m	85	QRFPR	ENSG00000186867			1	1
hsa-P2-can246-m	85	RNF44	ENSG00000146083	1	1		1
hsa-P2-can246-m	85	TRUB1	ENSG00000165832			1	1
hsa-P2-can246-m	85	GAREM1	ENSG00000141441	1	1	1	1
hsa-P2-can246-m	85	RDX	ENSG00000137710	1	1	1	1
hsa-P2-can246-m	85	UBN1	ENSG00000118900	1	1	1	1
hsa-P2-can246-m	85	ANP32E	ENSG00000143401	1		1	1
hsa-P2-can246-m	85	RAB6A	ENSG00000175582	1	1	1	1
hsa-P2-can246-m	85	ZNF138	ENSG00000197008			1	1
hsa-P2-can246-m	84	MAN2A1	ENSG00000112893	1		1
hsa-P2-can246-m	84	RBM20	ENSG00000203867		1	1	1
hsa-P2-can246-m	84	ARL4A	ENSG00000122644	1	1	1	1
hsa-P2-can246-m	84	RBM18	ENSG00000119446		1	1	1
hsa-P2-can246-m	84	SEMA3C	ENSG00000075223	1		1	1
hsa-P2-can246-m	84	PTER	ENSG00000165983	1	1	1	1
hsa-P2-can246-m	84	TFDP2	ENSG00000114126			1
hsa-P2-can246-m	84	KCTD16	ENSG00000183775	1	1	1	1
hsa-P2-can246-m	84	SPARC	ENSG00000113140				1
hsa-P2-can246-m	84	PTGS2	ENSG00000073756	1		1	1
hsa-P2-can246-m	84	TATDN3	ENSG00000203705	1	1	1	1
hsa-P2-can246-m	84	SLC35F3	ENSG00000183780		1	1	1
hsa-P2-can246-m	84	CAMSAP2	ENSG00000118200		1	1	1
hsa-P2-can246-m	84	ZNF606	ENSG00000166704			1
hsa-P2-can246-m	84	LITAF	ENSG00000189067		1		1
hsa-P2-can246-m	84	SLC46A3	ENSG00000139508		1	1	1
hsa-P2-can246-m	84	ZFP28	ENSG00000196867	1			1
hsa-P2-can246-m	83	MMP16	ENSG00000156103				1
hsa-P2-can246-m	83	GREM2	ENSG00000180875	1	1	1	1
hsa-P2-can246-m	83	KLF12	ENSG00000118922	1	1
hsa-P2-can246-m	83	SAXO2	ENSG00000188659	1		1	1
hsa-P2-can246-m	83	C18orf25	ENSG00000152242	1	1	1	1
hsa-P2-can246-m	83	CSGALNACT2	ENSG00000169826	1	1	1
hsa-P2-can246-m	83	TOB2	ENSG00000183864	1	1	1	1
hsa-P2-can246-m	83	PODXL	ENSG00000128567		1	1	1
hsa-P2-can246-m	83	NANOS1	ENSG00000188613		1	1	1
hsa-P2-can246-m	83	DNMT3B	ENSG00000088305	1	1	1	1
hsa-P2-can246-m	83	PTPRE	ENSG00000132334	1		1
hsa-P2-can246-m	83	HERC3	ENSG00000138641	1	1	1	1
hsa-P2-can246-m	83	RTKN2	ENSG00000182010		1		1
hsa-P2-can246-m	83	RBM28	ENSG00000106344	1
hsa-P2-can246-m	82	HERC1	ENSG00000103657	1	1
hsa-P2-can246-m	82	OARD1	ENSG00000124596	1
hsa-P2-can246-m	82	ARL5B	ENSG00000165997		1	1	1
hsa-P2-can246-m	82	DHX33	ENSG00000005100	1	1	1	1
hsa-P2-can246-m	82	ADARB2	ENSG00000185736			1	1
hsa-P2-can246-m	82	MAST4	ENSG00000069020		1	1	1
hsa-P2-can246-m	82	PMEPA1	ENSG00000124225	1	1	1	1
hsa-P2-can246-m	82	KRIT1	ENSG00000001631	1	1	1	1
hsa-P2-can246-m	82	SEMA3A	ENSG00000075213	1	1	1	1
hsa-P2-can246-m	82	RBMS1	ENSG00000153250	1	1	1	1
hsa-P2-can246-m	82	PTGFRN	ENSG00000134247		1		1
hsa-P2-can246-m	82	SLC22A15	ENSG00000163393			1	1
hsa-P2-can246-m	82	SLC12A6	ENSG00000140199		1		1
hsa-P2-can246-m	82	SERTM1	ENSG00000180440		1	1	1
hsa-P2-can246-m	82	ZNF181	ENSG00000197841	1	1		1
hsa-P2-can246-m	82	UNC5C	ENSG00000182168	1	1	1	1
hsa-P2-can246-m	82	ZNF254	ENSG00000213096	1	1	1	1
hsa-P2-can246-m	82	CSNK1G3	ENSG00000151292		1	1	1
hsa-P2-can246-m	82	B4GALT6	ENSG00000118276		1		1
hsa-P2-can246-m	81	SCML4	ENSG00000146285		1		1
hsa-P2-can246-m	81	CAVIN2	ENSG00000168497		1		1
hsa-P2-can246-m	81	TTC14	ENSG00000163728	1	1
hsa-P2-can246-m	81	BCL2L2	ENSG00000129473	1	1	1	1
hsa-P2-can246-m	81	UBASH3B	ENSG00000154127		1	1	1
hsa-P2-can246-m	81	FRY	ENSG00000073910	1	1	1	1
hsa-P2-can246-m	81	STAT3	ENSG00000168610	1	1	1	1
hsa-P2-can246-m	81	PURA	ENSG00000185129	1	1	1	1
hsa-P2-can246-m	81	IL1R1	ENSG00000115594			1	1
hsa-P2-can246-m	81	NOVA1	ENSG00000139910	1	1	1	1
hsa-P2-can246-m	81	CEP85L	ENSG00000111860	1	1	1	1
hsa-P2-can246-m	81	STXBP3	ENSG00000116266	1	1
hsa-P2-can246-m	81	CHMP7	ENSG00000147457		1	1	1
hsa-P2-can246-m	81	SPOP	ENSG00000121067	1		1
hsa-P2-can246-m	81	TRIQK	ENSG00000205133	1	1	1	1
