# Supplementary material for: Genome-wide, integrative analysis of circular RNA dysregulation and the corresponding circular RNA-microRNA-mRNA regulatory axes in autism
Source: HighWire-hosted journal article supplement (doi:10.1101/gr.255463.119), 2020-03-01
Supplement: Supplemental_Table_S5_circRNA-miRNA-mRNA_starBase.xlsx [file Supplemental_Table_S5_circRNA-miRNA-mRNA_starBase.xlsx]

## Sheet: Note
Supplemental Table S5. The identified ASD-associated circRNA-miRNA-mRNA axes and the corresponding target genes.
This file contains 8,170 ASD-associated circRNA-miRNA-mRNA regulatory axes and the 2,302 target genes of these axes.
Of the 2,302 targets, 3 are not included in the enrichment analysis because they are not protein-coding genes.

## Sheet: 8170 circRNA-miRNA-mRNA axes
circRNA_ID	circRNA	Chr#	Donor	Acceptor	Strand	circRNA_Host gene_Ensembl_ID	circRNA_Host gens_ Gene Symbol	circRNA DE_status	circRNA DE Module	Up-/Down-regulated circRNAs in ASD	miRNA_ID	Up-/Down-regulated miRNAs in ASD (from Wu's study)	circRNA_miRNA_rho	circRNA_miRNA_Pvalue	Target gene Ensembl_ID	Target gene_Symbol	downregulated mRNAs in ASD (1:yes)	upregulated mRNAs in ASD (1: yes)	miRNA_mRNA_rho	miRNA_mRNA_Pvalue	circRNA_mRNA_rho	circRNA_mRNA_Pvalue	combined_Pvalue	C1	C2	C3	C4
circ15905	circNRXN1_3	chr2	50472298	50620183	-	ENSG00000179915	NRXN1	down		down	hsa.miR.708.5p	up	-0.216171	0.0331142	ENSG00000170989	S1PR1		1	-0.670492	0	0.158844	0.089753	0	0	0	1	0
circ17709	circSLC4A7_1	chr3	27379249	27424152	-	ENSG00000033867	SLC4A7	down		down	hsa.miR.708.5p	up	-0.197115	0.0473089	ENSG00000170989	S1PR1		1	-0.670492	0	0.184602	0.0589688	0	0	0	1	0
circ219	circATRNL1_10	chr10	115315736	115215697	+	ENSG00000107518	ATRNL1		down_turquoise	down	hsa.miR.708.5p	up	-0.199181	0.0455711	ENSG00000170989	S1PR1		1	-0.670492	0	0.185113	0.0584532	0	0	0	1	0
circ246	circATRNL1_11	chr10	115469329	115120185	+	ENSG00000107518	ATRNL1	down	down_turquoise	down	hsa.miR.708.5p	up	-0.280353	0.00814435	ENSG00000170989	S1PR1		1	-0.670492	0	0.167245	0.0786424	0	0	0	1	0
circ3279	circFAT3	chr11	92355404	92352096	+	ENSG00000165323	FAT3	down	down_turquoise	down	hsa.miR.708.5p	up	-0.276348	0.00911154	ENSG00000170989	S1PR1		1	-0.670492	0	0.147415	0.106641	0	0	0	1	0
circ17709	circSLC4A7_1	chr3	27379249	27424152	-	ENSG00000033867	SLC4A7	down		down	hsa.miR.629.5p	up	-0.197751	0.0467681	ENSG00000117519	CNN3		1	-0.611625	9.21233e-09	0.299996	0.00495987	8.31081e-10	0	0	1	0
circ15905	circNRXN1_3	chr2	50472298	50620183	-	ENSG00000179915	NRXN1	down		down	hsa.miR.629.5p	up	-0.30334	0.0045432	ENSG00000170989	S1PR1		1	-0.616284	6.50076e-09	0.158844	0.089753	1.01507e-09	0	0	1	0
circ15905	circNRXN1_3	chr2	50472298	50620183	-	ENSG00000179915	NRXN1	down		down	hsa.miR.629.5p	up	-0.30334	0.0045432	ENSG00000077585	GPR137B		1	-0.62193	4.09721e-09	0.117227	0.161647	1.1417e-09	0	0	1	0
circ17709	circSLC4A7_1	chr3	27379249	27424152	-	ENSG00000033867	SLC4A7	down		down	hsa.miR.629.5p	up	-0.197751	0.0467681	ENSG00000077585	GPR137B		1	-0.62193	4.09721e-09	0.202191	0.0431291	2.91013e-09	0	0	1	0
circ15905	circNRXN1_3	chr2	50472298	50620183	-	ENSG00000179915	NRXN1	down		down	hsa.miR.629.5p	up	-0.30334	0.0045432	ENSG00000117519	CNN3		1	-0.611625	9.21233e-09	0.0777796	0.256533	3.7066e-09	0	0	1	0
circ3279	circFAT3	chr11	92355404	92352096	+	ENSG00000165323	FAT3	down	down_turquoise	down	hsa.miR.708.5p	up	-0.276348	0.00911154	ENSG00000134250	NOTCH2		1	-0.598821	2.19828e-08	0.186386	0.0571834	3.93467e-09	0	0	1	0
circ246	circATRNL1_11	chr10	115469329	115120185	+	ENSG00000107518	ATRNL1	down	down_turquoise	down	hsa.miR.708.5p	up	-0.280353	0.00814435	ENSG00000134250	NOTCH2		1	-0.598821	2.19828e-08	0.171266	0.0737005	4.48409e-09	0	0	1	0
circ17709	circSLC4A7_1	chr3	27379249	27424152	-	ENSG00000033867	SLC4A7	down		down	hsa.miR.629.5p	up	-0.197751	0.0467681	ENSG00000170989	S1PR1		1	-0.616284	6.50076e-09	0.184602	0.0589688	5.95024e-09	0	0	1	0
circ246	circATRNL1_11	chr10	115469329	115120185	+	ENSG00000107518	ATRNL1	down	down_turquoise	down	hsa.miR.708.5p	up	-0.280353	0.00814435	ENSG00000172380	GNG12		1	-0.584753	5.2474e-08	0.181874	0.0617823	8.50205e-09	0	0	1	0
circ217	circATRNL1_9	chr10	115315736	115120185	+	ENSG00000107518	ATRNL1	down	down_turquoise	down	hsa.miR.708.5p	up	-0.296191	0.00547408	ENSG00000134250	NOTCH2		1	-0.598821	2.19828e-08	0.0491633	0.339785	1.27166e-08	0	0	1	0
circ16286	circZNF638_2	chr2	71427414	71426460	+	ENSG00000075292	ZNF638	down		down	hsa.miR.766.3p	up	-0.311524	0.00365004	ENSG00000071967	CYBRD1			-0.584814	5.2281e-08	0.0902012	0.223948	1.32441e-08	0	0	0	1
circ3279	circFAT3	chr11	92355404	92352096	+	ENSG00000165323	FAT3	down	down_turquoise	down	hsa.miR.708.5p	up	-0.276348	0.00911154	ENSG00000087086	FTL		1	-0.597125	2.45054e-08	0.100387	0.199044	1.37299e-08	0	0	1	0
circ15905	circNRXN1_3	chr2	50472298	50620183	-	ENSG00000179915	NRXN1	down		down	hsa.miR.708.5p	up	-0.216171	0.0331142	ENSG00000087086	FTL		1	-0.597125	2.45054e-08	0.174121	0.0703362	1.72799e-08	0	0	1	0
circ219	circATRNL1_10	chr10	115315736	115215697	+	ENSG00000107518	ATRNL1		down_turquoise	down	hsa.miR.708.5p	up	-0.199181	0.0455711	ENSG00000087086	FTL		1	-0.597125	2.45054e-08	0.191478	0.0523154	1.76541e-08	0	0	1	0
circ17709	circSLC4A7_1	chr3	27379249	27424152	-	ENSG00000033867	SLC4A7	down		down	hsa.miR.708.5p	up	-0.197115	0.0473089	ENSG00000087086	FTL		1	-0.597125	2.45054e-08	0.191588	0.0522138	1.8239e-08	0	0	1	0
circ219	circATRNL1_10	chr10	115315736	115215697	+	ENSG00000107518	ATRNL1		down_turquoise	down	hsa.miR.708.5p	up	-0.199181	0.0455711	ENSG00000134250	NOTCH2		1	-0.598821	2.19828e-08	0.167695	0.0780781	2.30783e-08	0	0	1	0
circ17709	circSLC4A7_1	chr3	27379249	27424152	-	ENSG00000033867	SLC4A7	down		down	hsa.miR.708.5p	up	-0.197115	0.0473089	ENSG00000134250	NOTCH2		1	-0.598821	2.19828e-08	0.167975	0.0777272	2.37861e-08	0	0	1	0
circ15905	circNRXN1_3	chr2	50472298	50620183	-	ENSG00000179915	NRXN1	down		down	hsa.miR.708.5p	up	-0.216171	0.0331142	ENSG00000134250	NOTCH2		1	-0.598821	2.19828e-08	0.123456	0.149034	3.11541e-08	0	0	1	0
circ219	circATRNL1_10	chr10	115315736	115215697	+	ENSG00000107518	ATRNL1		down_turquoise	down	hsa.miR.708.5p	up	-0.199181	0.0455711	ENSG00000172380	GNG12		1	-0.584753	5.2474e-08	0.193465	0.0505056	3.43727e-08	0	0	1	0
circ15905	circNRXN1_3	chr2	50472298	50620183	-	ENSG00000179915	NRXN1	down		down	hsa.miR.629.5p	up	-0.30334	0.0045432	ENSG00000101871	MID1		1	-0.548871	3.93448e-07	0.176476	0.0676485	3.44114e-08	1	0	1	0
circ9676	circPHKB_2	chr16	47596531	47497399	+	ENSG00000102893	PHKB		down_turquoise	down	hsa.miR.708.5p	up	-0.215193	0.0337479	ENSG00000134250	NOTCH2		1	-0.598821	2.19828e-08	0.115173	0.165568	3.49085e-08	0	0	1	0
circ17709	circSLC4A7_1	chr3	27379249	27424152	-	ENSG00000033867	SLC4A7	down		down	hsa.miR.708.5p	up	-0.197115	0.0473089	ENSG00000172380	GNG12		1	-0.584753	5.2474e-08	0.193591	0.0503927	3.54989e-08	0	0	1	0
circ17709	circSLC4A7_1	chr3	27379249	27424152	-	ENSG00000033867	SLC4A7	down		down	hsa.miR.629.5p	up	-0.197751	0.0467681	ENSG00000183255	PTTG1IP		1	-0.540664	6.05523e-07	0.303023	0.00458134	3.67033e-08	0	0	1	0
circ219	circATRNL1_10	chr10	115315736	115215697	+	ENSG00000107518	ATRNL1		down_turquoise	down	hsa.miR.708.5p	up	-0.199181	0.0455711	ENSG00000150907	FOXO1			-0.506849	3.23671e-06	0.354857	0.00103332	4.25366e-08	0	0	1	0
circ15905	circNRXN1_3	chr2	50472298	50620183	-	ENSG00000179915	NRXN1	down		down	hsa.miR.629.5p	up	-0.30334	0.0045432	ENSG00000183255	PTTG1IP		1	-0.540664	6.05523e-07	0.187632	0.0559615	4.29288e-08	0	0	1	0
circ17709	circSLC4A7_1	chr3	27379249	27424152	-	ENSG00000033867	SLC4A7	down		down	hsa.miR.708.5p	up	-0.197115	0.0473089	ENSG00000150907	FOXO1			-0.506849	3.23671e-06	0.354782	0.00103573	4.41132e-08	0	0	1	0
circ3279	circFAT3	chr11	92355404	92352096	+	ENSG00000165323	FAT3	down	down_turquoise	down	hsa.miR.708.5p	up	-0.276348	0.00911154	ENSG00000172380	GNG12		1	-0.584753	5.2474e-08	0.0152835	0.448942	5.81826e-08	0	0	1	0
circ246	circATRNL1_11	chr10	115469329	115120185	+	ENSG00000107518	ATRNL1	down	down_turquoise	down	hsa.miR.708.5p	up	-0.280353	0.00814435	ENSG00000110436	SLC1A2			-0.551864	3.35371e-07	0.155181	0.0949383	6.91539e-08	1	0	1	0
circ15905	circNRXN1_3	chr2	50472298	50620183	-	ENSG00000179915	NRXN1	down		down	hsa.miR.708.5p	up	-0.216171	0.0331142	ENSG00000172380	GNG12		1	-0.584753	5.2474e-08	0.1057	0.186731	8.48601e-08	0	0	1	0
circ31	circMGEA5	chr10	101792839	101810314	-	ENSG00000198408	MGEA5		down_turquoise	down	hsa.miR.491.5p	up_DE module_yellow	-0.249405	0.0166733	ENSG00000105854	PON2			-0.574941	9.32307e-08	0.0812421	0.247214	9.90237e-08	0	0	1	0
circ17709	circSLC4A7_1	chr3	27379249	27424152	-	ENSG00000033867	SLC4A7	down		down	hsa.P2.can246.m	up	-0.286893	0.00692985	ENSG00000185650	ZFP36L1		1	-0.459984	2.5771e-05	0.330005	0.00217746	1.00101e-07	0	0	0	1
circ16286	circZNF638_2	chr2	71427414	71426460	+	ENSG00000075292	ZNF638	down		down	hsa.miR.766.3p	up	-0.311524	0.00365004	ENSG00000087086	FTL		1	-0.55498	2.8358e-07	0.0334101	0.389506	1.03451e-07	0	0	1	0
circ15905	circNRXN1_3	chr2	50472298	50620183	-	ENSG00000179915	NRXN1	down		down	hsa.miR.629.5p	up	-0.30334	0.0045432	ENSG00000124145	SDC4			-0.549796	3.7454e-07	0.0798557	0.250924	1.09006e-07	0	0	1	0
circ17709	circSLC4A7_1	chr3	27379249	27424152	-	ENSG00000033867	SLC4A7	down		down	hsa.miR.629.5p	up	-0.197751	0.0467681	ENSG00000101871	MID1		1	-0.548871	3.93448e-07	0.231967	0.0241483	1.13042e-07	1	0	1	0
circ19215	circPACRGL	chr4	20713539	20704466	+	ENSG00000163138	PACRGL		down_turquoise	down	hsa.miR.491.5p	up_DE module_yellow	-0.226898	0.0267775	ENSG00000105854	PON2			-0.574941	9.32307e-08	0.103317	0.192195	1.21235e-07	0	0	1	0
circ17709	circSLC4A7_1	chr3	27379249	27424152	-	ENSG00000033867	SLC4A7	down		down	hsa.miR.629.5p	up	-0.197751	0.0467681	ENSG00000124145	SDC4			-0.549796	3.7454e-07	0.220091	0.0306714	1.34389e-07	0	0	1	0
circ15905	circNRXN1_3	chr2	50472298	50620183	-	ENSG00000179915	NRXN1	down		down	hsa.miR.629.5p	up	-0.30334	0.0045432	ENSG00000165449	SLC16A9		1	-0.501203	4.21792e-06	0.219549	0.0310003	1.47265e-07	0	0	1	0
circ19215	circPACRGL	chr4	20713539	20704466	+	ENSG00000163138	PACRGL		down_turquoise	down	hsa.miR.491.5p	up_DE module_yellow	-0.226898	0.0267775	ENSG00000069702	TGFBR3		1	-0.581297	6.44077e-08	0.0439169	0.356091	1.51791e-07	0	0	1	0
circ3279	circFAT3	chr11	92355404	92352096	+	ENSG00000165323	FAT3	down	down_turquoise	down	hsa.miR.708.5p	up	-0.276348	0.00911154	ENSG00000150907	FOXO1			-0.506849	3.23671e-06	0.229173	0.02557	1.8296e-07	0	0	1	0
circ9676	circPHKB_2	chr16	47596531	47497399	+	ENSG00000102893	PHKB		down_turquoise	down	hsa.miR.708.5p	up	-0.215193	0.0337479	ENSG00000172380	GNG12		1	-0.584753	5.2474e-08	0.00055535	0.498187	2.11012e-07	0	0	1	0
circ217	circATRNL1_9	chr10	115315736	115120185	+	ENSG00000107518	ATRNL1	down	down_turquoise	down	hsa.miR.708.5p	up	-0.296191	0.00547408	ENSG00000110436	SLC1A2			-0.551864	3.35371e-07	0.00405311	0.486426	2.13352e-07	1	0	1	0
circ246	circATRNL1_11	chr10	115469329	115120185	+	ENSG00000107518	ATRNL1	down	down_turquoise	down	hsa.miR.708.5p	up	-0.280353	0.00814435	ENSG00000165895	ARHGAP42		1	-0.493737	5.94821e-06	0.235701	0.0223508	2.54154e-07	0	0	1	0
circ15905	circNRXN1_3	chr2	50472298	50620183	-	ENSG00000179915	NRXN1	down		down	hsa.miR.629.5p	up	-0.30334	0.0045432	ENSG00000134250	NOTCH2		1	-0.520239	1.69824e-06	0.123456	0.149034	2.68408e-07	0	0	1	0
circ219	circATRNL1_10	chr10	115315736	115215697	+	ENSG00000107518	ATRNL1		down_turquoise	down	hsa.miR.708.5p	up	-0.199181	0.0455711	ENSG00000124145	SDC4			-0.531809	9.53713e-07	0.220074	0.0306818	3.07021e-07	0	0	1	0
circ7234	circNEMF_1	chr14	49795791	49831361	-	ENSG00000165525	NEMF		down_turquoise	down	hsa.miR.450b.5p	up	-0.228948	0.0256873	ENSG00000065413	ANKRD44			-0.44644	4.46532e-05	0.349853	0.00120643	3.17508e-07	0	0	1	0
circ17709	circSLC4A7_1	chr3	27379249	27424152	-	ENSG00000033867	SLC4A7	down		down	hsa.miR.708.5p	up	-0.197115	0.0473089	ENSG00000124145	SDC4			-0.531809	9.53713e-07	0.220091	0.0306714	3.17522e-07	0	0	1	0
circ246	circATRNL1_11	chr10	115469329	115120185	+	ENSG00000107518	ATRNL1	down	down_turquoise	down	hsa.miR.708.5p	up	-0.280353	0.00814435	ENSG00000141756	FKBP10		1	-0.47649	1.28054e-05	0.253242	0.0153195	3.61688e-07	0	0	1	0
circ246	circATRNL1_11	chr10	115469329	115120185	+	ENSG00000107518	ATRNL1	down	down_turquoise	down	hsa.miR.708.5p	up	-0.280353	0.00814435	ENSG00000101938	CHRDL1		1	-0.49349	6.01545e-06	0.209611	0.0375518	4.10983e-07	0	0	0	1
circ246	circATRNL1_11	chr10	115469329	115120185	+	ENSG00000107518	ATRNL1	down	down_turquoise	down	hsa.miR.708.5p	up	-0.280353	0.00814435	ENSG00000124145	SDC4			-0.531809	9.53713e-07	0.0664928	0.288105	4.90702e-07	0	0	1	0
circ217	circATRNL1_9	chr10	115315736	115120185	+	ENSG00000107518	ATRNL1	down	down_turquoise	down	hsa.miR.130b.5p	up	-0.298159	0.00520265	ENSG00000137941	TTLL7	1		-0.496514	5.23882e-06	0.159264	0.0891714	5.28747e-07	0	0	1	0
circ246	circATRNL1_11	chr10	115469329	115120185	+	ENSG00000107518	ATRNL1	down	down_turquoise	down	hsa.miR.107	up	-0.399377	0.00023242	ENSG00000197763	TXNRD3			-0.375663	0.000569649	0.242659	0.0192955	5.53129e-07	0	0	1	0
circ27587	circDDX3Y	chrY	12913062	12909360	+	ENSG00000067048	DDX3Y	down		down	hsa.miR.148a.3p	up	-0.340794	0.00158703	ENSG00000214595	EML6			-0.453046	2.85207e-05	0.183433	0.0601625	5.85993e-07	0	0	0	1
circ206	circATRNL1_6	chr10	115268444	115120185	+	ENSG00000107518	ATRNL1	down		down	hsa.let.7g.3p	up	-0.414378	0.000133887	ENSG00000145087	STXBP5L	1		-0.40016	0.000250308	0.164043	0.0827506	5.95722e-07	0	1	0	0
circ17709	circSLC4A7_1	chr3	27379249	27424152	-	ENSG00000033867	SLC4A7	down		down	hsa.P2.can246.m	up	-0.286893	0.00692985	ENSG00000144730	IL17RD			-0.462483	2.32307e-05	0.247461	0.0173963	6.01023e-07	0	0	0	1
circ17709	circSLC4A7_1	chr3	27379249	27424152	-	ENSG00000033867	SLC4A7	down		down	hsa.miR.629.5p	up	-0.197751	0.0467681	ENSG00000003989	SLC7A2		1	-0.518913	1.81227e-06	0.215993	0.0332291	6.04093e-07	0	0	1	0
circ219	circATRNL1_10	chr10	115315736	115215697	+	ENSG00000107518	ATRNL1		down_turquoise	down	hsa.miR.708.5p	up	-0.199181	0.0455711	ENSG00000176971	FIBIN			-0.50435	3.64107e-06	0.240318	0.0202822	7.09504e-07	0	0	0	1
circ219	circATRNL1_10	chr10	115315736	115215697	+	ENSG00000107518	ATRNL1		down_turquoise	down	hsa.miR.708.5p	up	-0.199181	0.0455711	ENSG00000110436	SLC1A2			-0.551864	3.35371e-07	0.0900726	0.224273	7.21339e-07	1	0	1	0
circ219	circATRNL1_10	chr10	115315736	115215697	+	ENSG00000107518	ATRNL1		down_turquoise	down	hsa.miR.708.5p	up	-0.199181	0.0455711	ENSG00000185650	ZFP36L1		1	-0.452641	3.48101e-05	0.329614	0.00220209	7.33793e-07	0	0	0	1
circ17709	circSLC4A7_1	chr3	27379249	27424152	-	ENSG00000033867	SLC4A7	down		down	hsa.miR.708.5p	up	-0.197115	0.0473089	ENSG00000176971	FIBIN			-0.50435	3.64107e-06	0.240025	0.0204086	7.38009e-07	0	0	0	1
circ17709	circSLC4A7_1	chr3	27379249	27424152	-	ENSG00000033867	SLC4A7	down		down	hsa.miR.708.5p	up	-0.197115	0.0473089	ENSG00000110436	SLC1A2			-0.551864	3.35371e-07	0.0902751	0.223761	7.44584e-07	1	0	1	0
circ17709	circSLC4A7_1	chr3	27379249	27424152	-	ENSG00000033867	SLC4A7	down		down	hsa.miR.708.5p	up	-0.197115	0.0473089	ENSG00000185650	ZFP36L1		1	-0.452641	3.48101e-05	0.330005	0.00217746	7.51335e-07	0	0	0	1
circ246	circATRNL1_11	chr10	115469329	115120185	+	ENSG00000107518	ATRNL1	down	down_turquoise	down	hsa.miR.148a.3p	up	-0.358576	0.000919439	ENSG00000214595	EML6			-0.453046	2.85207e-05	0.126574	0.142967	7.82104e-07	0	0	0	1
circ246	circATRNL1_11	chr10	115469329	115120185	+	ENSG00000107518	ATRNL1	down	down_turquoise	down	hsa.miR.708.5p	up	-0.280353	0.00814435	ENSG00000176971	FIBIN			-0.50435	3.64107e-06	0.134854	0.127663	7.89012e-07	0	0	0	1
circ206	circATRNL1_6	chr10	115268444	115120185	+	ENSG00000107518	ATRNL1	down		down	hsa.let.7g.3p	up	-0.414378	0.000133887	ENSG00000177182	CLVS1			-0.386986	0.000392411	0.171712	0.0731679	7.99987e-07	0	0	0	1
circ217	circATRNL1_9	chr10	115315736	115120185	+	ENSG00000107518	ATRNL1	down	down_turquoise	down	hsa.miR.130b.5p	up	-0.298159	0.00520265	ENSG00000197601	FAR1			-0.478156	1.19106e-05	0.169238	0.076163	9.62532e-07	0	0	0	1
circ17709	circSLC4A7_1	chr3	27379249	27424152	-	ENSG00000033867	SLC4A7	down		down	hsa.miR.629.5p	up	-0.197751	0.0467681	ENSG00000166292	TMEM100			-0.4971	5.09958e-06	0.241189	0.0199103	9.6786e-07	0	0	0	1
circ5511	circARID1A	chr1	26732792	26729651	+	ENSG00000117713	ARID1A	up		up	hsa.miR.204.3p	down	-0.37186	0.000599038	ENSG00000115365	LANCL1	1		-0.429964	8.47133e-05	0.155153	0.094979	9.80945e-07	0	0	0	1
circ5511	circARID1A	chr1	26732792	26729651	+	ENSG00000117713	ARID1A	up		up	hsa.miR.204.3p	down	-0.37186	0.000599038	ENSG00000117594	HSD11B1			-0.42475	0.000103095	0.167159	0.0787509	9.88945e-07	1	0	0	0
circ3279	circFAT3	chr11	92355404	92352096	+	ENSG00000165323	FAT3	down	down_turquoise	down	hsa.miR.708.5p	up	-0.276348	0.00911154	ENSG00000185650	ZFP36L1		1	-0.452641	3.48101e-05	0.252248	0.0156612	1.00794e-06	0	0	0	1
circ15905	circNRXN1_3	chr2	50472298	50620183	-	ENSG00000179915	NRXN1	down		down	hsa.miR.708.5p	up	-0.216171	0.0331142	ENSG00000110436	SLC1A2			-0.551864	3.35371e-07	0.00220014	0.492631	1.09953e-06	1	0	1	0
circ217	circATRNL1_9	chr10	115315736	115120185	+	ENSG00000107518	ATRNL1	down	down_turquoise	down	hsa.miR.130b.5p	up	-0.298159	0.00520265	ENSG00000154620	TMSB4Y	1		-0.468314	1.81817e-05	0.185074	0.0584923	1.11075e-06	0	1	0	0
circ17709	circSLC4A7_1	chr3	27379249	27424152	-	ENSG00000033867	SLC4A7	down		down	hsa.miR.629.5p	up	-0.197751	0.0467681	ENSG00000134250	NOTCH2		1	-0.520239	1.69824e-06	0.167975	0.0777272	1.22582e-06	0	0	1	0
circ15905	circNRXN1_3	chr2	50472298	50620183	-	ENSG00000179915	NRXN1	down		down	hsa.miR.629.5p	up	-0.30334	0.0045432	ENSG00000168309	FAM107A		1	-0.431013	8.14024e-05	0.24279	0.0192415	1.39294e-06	0	0	0	1
circ15905	circNRXN1_3	chr2	50472298	50620183	-	ENSG00000179915	NRXN1	down		down	hsa.miR.708.5p	up	-0.216171	0.0331142	ENSG00000150907	FOXO1			-0.506849	3.23671e-06	0.177127	0.0669197	1.40288e-06	0	0	1	0
circ246	circATRNL1_11	chr10	115469329	115120185	+	ENSG00000107518	ATRNL1	down	down_turquoise	down	hsa.miR.107	up	-0.399377	0.00023242	ENSG00000072422	RHOBTB1	1		-0.299889	0.00509518	0.2917	0.00614021	1.42025e-06	0	1	1	0
circ246	circATRNL1_11	chr10	115469329	115120185	+	ENSG00000107518	ATRNL1	down	down_turquoise	down	hsa.miR.708.5p	up	-0.280353	0.00814435	ENSG00000153944	MSI2			-0.463686	2.20926e-05	0.205336	0.0406901	1.42902e-06	0	0	1	0
circ12207	circPPP4R1_1	chr18	9583117	9595102	-	ENSG00000154845	PPP4R1	up		up	hsa.miR.619.5p	down	-0.253819	0.0151241	ENSG00000205364	MT1M			-0.505461	3.45582e-06	0.126853	0.142433	1.4506e-06	0	0	0	1
circ15905	circNRXN1_3	chr2	50472298	50620183	-	ENSG00000179915	NRXN1	down		down	hsa.miR.629.5p	up	-0.30334	0.0045432	ENSG00000166292	TMEM100			-0.4971	5.09958e-06	0.0493947	0.339072	1.52243e-06	0	0	0	1
circ15905	circNRXN1_3	chr2	50472298	50620183	-	ENSG00000179915	NRXN1	down		down	hsa.miR.708.5p	up	-0.216171	0.0331142	ENSG00000124145	SDC4			-0.531809	9.53713e-07	0.0798557	0.250924	1.5344e-06	0	0	1	0
circ246	circATRNL1_11	chr10	115469329	115120185	+	ENSG00000107518	ATRNL1	down	down_turquoise	down	hsa.miR.708.5p	up	-0.280353	0.00814435	ENSG00000007372	PAX6			-0.476398	1.28569e-05	0.167277	0.0786026	1.58753e-06	1	0	1	0
circ9676	circPHKB_2	chr16	47596531	47497399	+	ENSG00000102893	PHKB		down_turquoise	down	hsa.miR.708.5p	up	-0.215193	0.0337479	ENSG00000141756	FKBP10		1	-0.47649	1.28054e-05	0.237412	0.0216788	1.78332e-06	0	0	1	0
circ206	circATRNL1_6	chr10	115268444	115120185	+	ENSG00000107518	ATRNL1	down		down	hsa.miR.148a.3p	up	-0.332569	0.00202179	ENSG00000214595	EML6			-0.453046	2.85207e-05	0.115581	0.16509	1.80908e-06	0	0	0	1
circ3279	circFAT3	chr11	92355404	92352096	+	ENSG00000165323	FAT3	down	down_turquoise	down	hsa.miR.708.5p	up	-0.276348	0.00911154	ENSG00000007372	PAX6			-0.476398	1.28569e-05	0.164427	0.0822498	1.82881e-06	1	0	1	0
circ17709	circSLC4A7_1	chr3	27379249	27424152	-	ENSG00000033867	SLC4A7	down		down	hsa.miR.629.5p	up	-0.197751	0.0467681	ENSG00000185650	ZFP36L1		1	-0.426324	9.71936e-05	0.330005	0.00217746	1.87346e-06	0	0	1	0
circ17709	circSLC4A7_1	chr3	27379249	27424152	-	ENSG00000033867	SLC4A7	down		down	hsa.miR.629.5p	up	-0.197751	0.0467681	ENSG00000165449	SLC16A9		1	-0.501203	4.21792e-06	0.186124	0.0574434	2.11516e-06	0	0	1	0
circ3279	circFAT3	chr11	92355404	92352096	+	ENSG00000165323	FAT3	down	down_turquoise	down	hsa.miR.708.5p	up	-0.276348	0.00911154	ENSG00000176971	FIBIN			-0.50435	3.64107e-06	0.0424104	0.360823	2.22179e-06	0	0	0	1
circ206	circATRNL1_6	chr10	115268444	115120185	+	ENSG00000107518	ATRNL1	down		down	hsa.let.7g.3p	up	-0.414378	0.000133887	ENSG00000071794	HLTF			-0.335431	0.00194226	0.19793	0.0466173	2.24706e-06	0	0	1	0
circ7886	circVRK1	chr14	96860735	96833467	+	ENSG00000100749	VRK1		down_turquoise	down	hsa.miR.450b.5p	up	-0.273195	0.00967881	ENSG00000117594	HSD11B1			-0.457948	2.80296e-05	0.199619	0.0452092	2.2707e-06	1	0	1	0
circ217	circATRNL1_9	chr10	115315736	115120185	+	ENSG00000107518	ATRNL1	down	down_turquoise	down	hsa.miR.130b.5p	up	-0.298159	0.00520265	ENSG00000138386	NAB1			-0.423362	0.000108576	0.236386	0.0220331	2.30073e-06	0	0	1	0
circ15905	circNRXN1_3	chr2	50472298	50620183	-	ENSG00000179915	NRXN1	down		down	hsa.miR.708.5p	up	-0.216171	0.0331142	ENSG00000007372	PAX6			-0.476398	1.28569e-05	0.222276	0.0293745	2.31066e-06	1	0	1	0
circ3279	circFAT3	chr11	92355404	92352096	+	ENSG00000165323	FAT3	down	down_turquoise	down	hsa.miR.708.5p	up	-0.276348	0.00911154	ENSG00000165895	ARHGAP42		1	-0.493737	5.94821e-06	0.0862188	0.234137	2.34102e-06	0	0	1	0
circ19215	circPACRGL	chr4	20713539	20704466	+	ENSG00000163138	PACRGL		down_turquoise	down	hsa.miR.491.5p	up_DE module_yellow	-0.226898	0.0267775	ENSG00000107249	GLIS3		1	-0.516599	2.02861e-06	0.0855224	0.235944	2.36202e-06	0	0	1	0
circ246	circATRNL1_11	chr10	115469329	115120185	+	ENSG00000107518	ATRNL1	down	down_turquoise	down	hsa.miR.107	up	-0.399377	0.00023242	ENSG00000116560	SFPQ			-0.383161	0.000445697	0.136447	0.12485	2.38123e-06	0	0	1	0
circ246	circATRNL1_11	chr10	115469329	115120185	+	ENSG00000107518	ATRNL1	down	down_turquoise	down	hsa.miR.130b.5p	up	-0.286115	0.00706556	ENSG00000197601	FAR1			-0.478156	1.19106e-05	0.120172	0.1556	2.40783e-06	0	0	0	1
circ246	circATRNL1_11	chr10	115469329	115120185	+	ENSG00000107518	ATRNL1	down	down_turquoise	down	hsa.miR.148a.3p	up	-0.358576	0.000919439	ENSG00000125772	GPCPD1	1		-0.403002	0.000203896	0.173132	0.0714887	2.45843e-06	0	1	1	0
circ206	circATRNL1_6	chr10	115268444	115120185	+	ENSG00000107518	ATRNL1	down		down	hsa.miR.363.3p	up	-0.317642	0.00308697	ENSG00000145439	CBR4			-0.407473	0.000193549	0.235028	0.0226664	2.48154e-06	0	0	1	0
circ246	circATRNL1_11	chr10	115469329	115120185	+	ENSG00000107518	ATRNL1	down	down_turquoise	down	hsa.miR.708.5p	up	-0.280353	0.00814435	ENSG00000139155	SLCO1C1			-0.465321	2.0629e-05	0.164712	0.0818791	2.51659e-06	1	0	0	0
circ246	circATRNL1_11	chr10	115469329	115120185	+	ENSG00000107518	ATRNL1	down	down_turquoise	down	hsa.miR.130b.5p	up	-0.286115	0.00706556	ENSG00000137941	TTLL7	1		-0.496514	5.23882e-06	0.0329819	0.390887	2.63296e-06	0	0	1	0
circ31	circMGEA5	chr10	101792839	101810314	-	ENSG00000198408	MGEA5		down_turquoise	down	hsa.miR.491.5p	up_DE module_yellow	-0.249405	0.0166733	ENSG00000107249	GLIS3		1	-0.516599	2.02861e-06	0.0190514	0.436448	2.68072e-06	0	0	1	0
circ17709	circSLC4A7_1	chr3	27379249	27424152	-	ENSG00000033867	SLC4A7	down		down	hsa.P2.can246.m	up	-0.286893	0.00692985	ENSG00000162407	PLPP3			-0.416574	0.000139445	0.251606	0.015885	2.7761e-06	0	0	0	1
circ619	circZMYND11_2	chr10	249088	179994	+	ENSG00000015171	ZMYND11		down_turquoise	down	hsa.miR.708.5p	up	-0.265587	0.0115747	ENSG00000150907	FOXO1			-0.506849	3.23671e-06	0.0269593	0.410443	2.7804e-06	0	0	1	0
circ206	circATRNL1_6	chr10	115268444	115120185	+	ENSG00000107518	ATRNL1	down		down	hsa.miR.363.3p	up	-0.317642	0.00308697	ENSG00000147180	ZNF711			-0.416389	0.00014039	0.208327	0.0384733	2.9893e-06	0	0	1	0
circ3279	circFAT3	chr11	92355404	92352096	+	ENSG00000165323	FAT3	down	down_turquoise	down	hsa.miR.708.5p	up	-0.276348	0.00911154	ENSG00000091656	ZFHX4			-0.367765	0.000733392	0.324895	0.00251967	3.01553e-06	0	0	1	0
circ5511	circARID1A	chr1	26732792	26729651	+	ENSG00000117713	ARID1A	up		up	hsa.miR.204.3p	down	-0.37186	0.000599038	ENSG00000189180	ZNF33A			-0.415186	0.000146679	0.102064	0.195105	3.06449e-06	0	0	0	1
circ15905	circNRXN1_3	chr2	50472298	50620183	-	ENSG00000179915	NRXN1	down		down	hsa.miR.708.5p	up	-0.216171	0.0331142	ENSG00000176971	FIBIN			-0.50435	3.64107e-06	0.125656	0.144736	3.11366e-06	0	0	0	1
circ206	circATRNL1_6	chr10	115268444	115120185	+	ENSG00000107518	ATRNL1	down		down	hsa.let.7g.3p	up	-0.414378	0.000133887	ENSG00000184672	RALYL			-0.361132	0.000902631	0.125417	0.145199	3.12903e-06	0	0	0	1
circ219	circATRNL1_10	chr10	115315736	115215697	+	ENSG00000107518	ATRNL1		down_turquoise	down	hsa.miR.708.5p	up	-0.199181	0.0455711	ENSG00000165895	ARHGAP42		1	-0.493737	5.94821e-06	0.178127	0.065811	3.17552e-06	0	0	1	0
circ17709	circSLC4A7_1	chr3	27379249	27424152	-	ENSG00000033867	SLC4A7	down		down	hsa.miR.629.5p	up	-0.197751	0.0467681	ENSG00000129353	SLC44A2			-0.37193	0.000642382	0.37116	0.00061298	3.26713e-06	0	0	1	0
circ17709	circSLC4A7_1	chr3	27379249	27424152	-	ENSG00000033867	SLC4A7	down		down	hsa.miR.708.5p	up	-0.197115	0.0473089	ENSG00000165895	ARHGAP42		1	-0.493737	5.94821e-06	0.178113	0.0658266	3.28426e-06	0	0	1	0
circ206	circATRNL1_6	chr10	115268444	115120185	+	ENSG00000107518	ATRNL1	down		down	hsa.miR.148a.3p	up	-0.332569	0.00202179	ENSG00000125772	GPCPD1	1		-0.403002	0.000203896	0.198413	0.046211	3.36749e-06	0	1	1	0
circ3279	circFAT3	chr11	92355404	92352096	+	ENSG00000165323	FAT3	down	down_turquoise	down	hsa.miR.708.5p	up	-0.276348	0.00911154	ENSG00000168309	FAM107A		1	-0.427373	9.34339e-05	0.234105	0.023105	3.46529e-06	0	0	1	0
circ7234	circNEMF_1	chr14	49795791	49831361	-	ENSG00000165525	NEMF		down_turquoise	down	hsa.miR.450b.5p	up	-0.228948	0.0256873	ENSG00000138760	SCARB2			-0.432247	7.76604e-05	0.271998	0.00995835	3.49611e-06	0	0	1	0
circ246	circATRNL1_11	chr10	115469329	115120185	+	ENSG00000107518	ATRNL1	down	down_turquoise	down	hsa.miR.107	up	-0.399377	0.00023242	ENSG00000075188	NUP37			-0.283012	0.00776395	0.265644	0.0115593	3.6518e-06	0	0	1	0
circ15905	circNRXN1_3	chr2	50472298	50620183	-	ENSG00000179915	NRXN1	down		down	hsa.miR.629.5p	up	-0.30334	0.0045432	ENSG00000185650	ZFP36L1		1	-0.426324	9.71936e-05	0.196649	0.0477079	3.68427e-06	0	0	1	0
circ206	circATRNL1_6	chr10	115268444	115120185	+	ENSG00000107518	ATRNL1	down		down	hsa.miR.363.3p	up	-0.317642	0.00308697	ENSG00000164338	UTP15			-0.397538	0.000274126	0.228715	0.0258095	3.80495e-06	0	0	1	0
circ5511	circARID1A	chr1	26732792	26729651	+	ENSG00000117713	ARID1A	up		up	hsa.miR.204.3p	down	-0.37186	0.000599038	ENSG00000124275	MTRR			-0.405035	0.000211001	0.111085	0.174733	3.84309e-06	0	0	0	1
circ206	circATRNL1_6	chr10	115268444	115120185	+	ENSG00000107518	ATRNL1	down		down	hsa.miR.363.3p	up	-0.317642	0.00308697	ENSG00000104427	ZC2HC1A			-0.412131	0.000163825	0.199832	0.0450343	3.94998e-06	0	0	1	0
circ206	circATRNL1_6	chr10	115268444	115120185	+	ENSG00000107518	ATRNL1	down		down	hsa.miR.363.3p	up	-0.317642	0.00308697	ENSG00000164828	SUN1			-0.46236	2.33504e-05	0.0569723	0.316055	3.95107e-06	0	0	1	0
circ246	circATRNL1_11	chr10	115469329	115120185	+	ENSG00000107518	ATRNL1	down	down_turquoise	down	hsa.miR.708.5p	up	-0.280353	0.00814435	ENSG00000165449	SLC16A9		1	-0.454801	3.1885e-05	0.158569	0.0901342	4.04759e-06	0	0	0	1
circ206	circATRNL1_6	chr10	115268444	115120185	+	ENSG00000107518	ATRNL1	down		down	hsa.let.7g.3p	up	-0.414378	0.000133887	ENSG00000058091	CDK14	1		-0.337437	0.00183344	0.153693	0.0971069	4.11403e-06	0	1	1	0
circ3279	circFAT3	chr11	92355404	92352096	+	ENSG00000165323	FAT3	down	down_turquoise	down	hsa.miR.708.5p	up	-0.276348	0.00911154	ENSG00000158006	PAFAH2			-0.408028	0.000189763	0.256583	0.0142174	4.22862e-06	0	0	1	0
circ17709	circSLC4A7_1	chr3	27379249	27424152	-	ENSG00000033867	SLC4A7	down		down	hsa.miR.629.5p	up	-0.197751	0.0467681	ENSG00000141574	SECTM1			-0.391059	0.000342124	0.341648	0.00154707	4.25492e-06	0	0	1	0
circ217	circATRNL1_9	chr10	115315736	115120185	+	ENSG00000107518	ATRNL1	down	down_turquoise	down	hsa.miR.130b.5p	up	-0.298159	0.00520265	ENSG00000113580	NR3C1			-0.418148	0.000131644	0.211613	0.0361498	4.25572e-06	0	0	1	0
circ206	circATRNL1_6	chr10	115268444	115120185	+	ENSG00000107518	ATRNL1	down		down	hsa.miR.363.3p	up	-0.317642	0.00308697	ENSG00000163053	SLC16A14			-0.426694	9.5851e-05	0.162905	0.0842478	4.28163e-06	0	0	1	0
circ206	circATRNL1_6	chr10	115268444	115120185	+	ENSG00000107518	ATRNL1	down		down	hsa.let.7g.3p	up	-0.414378	0.000133887	ENSG00000213047	DENND1B			-0.256541	0.0143657	0.258628	0.0135765	4.4627e-06	0	0	1	0
circ17709	circSLC4A7_1	chr3	27379249	27424152	-	ENSG00000033867	SLC4A7	down		down	hsa.P2.can246.m	up	-0.286893	0.00692985	ENSG00000153208	MERTK		1	-0.445637	4.61001e-05	0.163566	0.0833749	4.5423e-06	0	0	0	1
circ27587	circDDX3Y	chrY	12913062	12909360	+	ENSG00000067048	DDX3Y	down		down	hsa.miR.148a.3p	up	-0.340794	0.00158703	ENSG00000123570	RAB9B			-0.311384	0.00366392	0.302776	0.00461128	4.56936e-06	0	0	0	1
circ206	circATRNL1_6	chr10	115268444	115120185	+	ENSG00000107518	ATRNL1	down		down	hsa.miR.363.3p	up	-0.317642	0.00308697	ENSG00000136152	COG3			-0.411113	0.000169938	0.192661	0.0512317	4.57883e-06	0	0	1	0
circ17709	circSLC4A7_1	chr3	27379249	27424152	-	ENSG00000033867	SLC4A7	down		down	hsa.P2.can246.m	up	-0.286893	0.00692985	ENSG00000116117	PARD3B			-0.390719	0.000346078	0.26609	0.0114401	4.66393e-06	1	0	0	0
circ206	circATRNL1_6	chr10	115268444	115120185	+	ENSG00000107518	ATRNL1	down		down	hsa.miR.363.3p	up	-0.317642	0.00308697	ENSG00000065883	CDK13			-0.445977	4.54827e-05	0.101833	0.195646	4.66892e-06	1	0	1	0
circ217	circATRNL1_9	chr10	115315736	115120185	+	ENSG00000107518	ATRNL1	down	down_turquoise	down	hsa.miR.130b.5p	up	-0.298159	0.00520265	ENSG00000187231	SESTD1	1		-0.419598	0.000124813	0.201153	0.0439597	4.83166e-06	0	1	1	0
circ14091	circBAZ2B	chr2	159337462	159395834	-	ENSG00000123636	BAZ2B	down		down	hsa.miR.708.5p	up	-0.296785	0.00539091	ENSG00000007372	PAX6			-0.476398	1.28569e-05	0.0261132	0.413209	4.84584e-06	1	0	1	0
circ3279	circFAT3	chr11	92355404	92352096	+	ENSG00000165323	FAT3	down	down_turquoise	down	hsa.miR.708.5p	up	-0.276348	0.00911154	ENSG00000153944	MSI2			-0.463686	2.20926e-05	0.125189	0.145641	4.94788e-06	0	0	1	0
circ246	circATRNL1_11	chr10	115469329	115120185	+	ENSG00000107518	ATRNL1	down	down_turquoise	down	hsa.miR.130b.5p	up	-0.286115	0.00706556	ENSG00000154620	TMSB4Y	1		-0.468314	1.81817e-05	0.0879774	0.229607	4.97482e-06	0	1	0	0
circ7234	circNEMF_1	chr14	49795791	49831361	-	ENSG00000165525	NEMF		down_turquoise	down	hsa.miR.450b.5p	up	-0.228948	0.0256873	ENSG00000117594	HSD11B1			-0.457948	2.80296e-05	0.202842	0.0426149	5.15281e-06	1	0	1	0
circ206	circATRNL1_6	chr10	115268444	115120185	+	ENSG00000107518	ATRNL1	down		down	hsa.let.7g.3p	up	-0.414378	0.000133887	ENSG00000145864	GABRB2	1		-0.318431	0.00312222	0.170886	0.0741583	5.20022e-06	0	1	0	0
circ206	circATRNL1_6	chr10	115268444	115120185	+	ENSG00000107518	ATRNL1	down		down	hsa.let.7g.3p	up	-0.414378	0.000133887	ENSG00000109738	GLRB	1		-0.331328	0.00218307	0.147286	0.106844	5.23441e-06	0	1	0	0
circ217	circATRNL1_9	chr10	115315736	115120185	+	ENSG00000107518	ATRNL1	down	down_turquoise	down	hsa.miR.130b.5p	up	-0.298159	0.00520265	ENSG00000163697	APBB2			-0.418919	0.000127969	0.197315	0.0471382	5.25751e-06	0	0	1	0
circ246	circATRNL1_11	chr10	115469329	115120185	+	ENSG00000107518	ATRNL1	down	down_turquoise	down	hsa.miR.107	up	-0.399377	0.00023242	ENSG00000125772	GPCPD1	1		-0.336264	0.00189638	0.173132	0.0714887	5.27623e-06	0	1	1	0
circ206	circATRNL1_6	chr10	115268444	115120185	+	ENSG00000107518	ATRNL1	down		down	hsa.let.7g.3p	up	-0.414378	0.000133887	ENSG00000152760	TCTEX1D1	1		-0.306553	0.00428696	0.187938	0.0556638	5.34185e-06	0	1	0	0
circ3279	circFAT3	chr11	92355404	92352096	+	ENSG00000165323	FAT3	down	down_turquoise	down	hsa.miR.708.5p	up	-0.276348	0.00911154	ENSG00000141756	FKBP10		1	-0.47649	1.28054e-05	0.0715008	0.273877	5.34271e-06	0	0	1	0
circ3279	circFAT3	chr11	92355404	92352096	+	ENSG00000165323	FAT3	down	down_turquoise	down	hsa.miR.708.5p	up	-0.276348	0.00911154	ENSG00000146535	GNA12		1	-0.3665	0.000763257	0.302842	0.0046033	5.35139e-06	0	0	1	0
circ15905	circNRXN1_3	chr2	50472298	50620183	-	ENSG00000179915	NRXN1	down		down	hsa.miR.708.5p	up	-0.216171	0.0331142	ENSG00000165449	SLC16A9		1	-0.454801	3.1885e-05	0.219549	0.0310003	5.45818e-06	0	0	0	1
circ206	circATRNL1_6	chr10	115268444	115120185	+	ENSG00000107518	ATRNL1	down		down	hsa.miR.363.3p	up	-0.317642	0.00308697	ENSG00000071189	SNX13			-0.40448	0.000215174	0.194454	0.0496234	5.49236e-06	0	0	1	0
circ206	circATRNL1_6	chr10	115268444	115120185	+	ENSG00000107518	ATRNL1	down		down	hsa.let.7g.3p	up	-0.414378	0.000133887	ENSG00000147180	ZNF711			-0.290849	0.006403	0.208327	0.0384733	5.49542e-06	0	0	1	0
circ7886	circVRK1	chr14	96860735	96833467	+	ENSG00000100749	VRK1		down_turquoise	down	hsa.miR.450b.5p	up	-0.273195	0.00967881	ENSG00000225973	PIGBOS1			-0.36758	0.000737695	0.301835	0.0047268	5.60909e-06	0	0	1	0
circ7886	circVRK1	chr14	96860735	96833467	+	ENSG00000100749	VRK1		down_turquoise	down	hsa.miR.450b.5p	up	-0.273195	0.00967881	ENSG00000165675	ENOX2			-0.470165	1.68065e-05	0.0958449	0.209941	5.6684e-06	0	0	1	0
circ206	circATRNL1_6	chr10	115268444	115120185	+	ENSG00000107518	ATRNL1	down		down	hsa.let.7g.3p	up	-0.414378	0.000133887	ENSG00000005810	MYCBP2			-0.340892	0.00165865	0.120522	0.154891	5.70483e-06	0	0	0	1
circ206	circATRNL1_6	chr10	115268444	115120185	+	ENSG00000107518	ATRNL1	down		down	hsa.let.7g.3p	up	-0.414378	0.000133887	ENSG00000126970	ZC4H2			-0.355702	0.0010666	0.0835177	0.241187	5.71154e-06	0	0	0	1
circ9676	circPHKB_2	chr16	47596531	47497399	+	ENSG00000102893	PHKB		down_turquoise	down	hsa.miR.708.5p	up	-0.215193	0.0337479	ENSG00000150907	FOXO1			-0.506849	3.23671e-06	0.0548562	0.322073	5.82041e-06	0	0	1	0
circ3518	circEIF4G3_1	chr1	20893517	20942330	-	ENSG00000075151	EIF4G3	down		down	hsa.miR.3938	up	-0.295345	0.0055946	ENSG00000155792	DEPTOR			-0.460632	2.50887e-05	0.0761781	0.260903	6.03198e-06	0	0	0	1
circ206	circATRNL1_6	chr10	115268444	115120185	+	ENSG00000107518	ATRNL1	down		down	hsa.miR.363.3p	up	-0.317642	0.00308697	ENSG00000164197	RNF180			-0.357985	0.000994641	0.264208	0.0119501	6.04244e-06	0	0	0	1
circ246	circATRNL1_11	chr10	115469329	115120185	+	ENSG00000107518	ATRNL1	down	down_turquoise	down	hsa.miR.107	up	-0.399377	0.00023242	ENSG00000071794	HLTF			-0.308744	0.00404711	0.206515	0.0398047	6.15214e-06	0	0	1	0
circ246	circATRNL1_11	chr10	115469329	115120185	+	ENSG00000107518	ATRNL1	down	down_turquoise	down	hsa.miR.107	up	-0.399377	0.00023242	ENSG00000123570	RAB9B			-0.298932	0.00522149	0.219026	0.0313206	6.2352e-06	0	0	1	0
circ206	circATRNL1_6	chr10	115268444	115120185	+	ENSG00000107518	ATRNL1	down		down	hsa.let.7g.3p	up	-0.414378	0.000133887	ENSG00000175893	ZDHHC21			-0.27135	0.0102501	0.224959	0.0278435	6.26458e-06	0	0	0	1
circ7886	circVRK1	chr14	96860735	96833467	+	ENSG00000100749	VRK1		down_turquoise	down	hsa.miR.450b.5p	up	-0.273195	0.00967881	ENSG00000065413	ANKRD44			-0.44644	4.46532e-05	0.158538	0.0901777	6.37568e-06	0	0	1	0
circ246	circATRNL1_11	chr10	115469329	115120185	+	ENSG00000107518	ATRNL1	down	down_turquoise	down	hsa.miR.107	up	-0.399377	0.00023242	ENSG00000118965	WDR35			-0.321918	0.00283836	0.183452	0.0601425	6.47768e-06	0	0	1	0
circ19323	circGRK4	chr4	3029409	2984513	+	ENSG00000125388	GRK4	down		down	hsa.miR.450b.5p	up	-0.198287	0.046317	ENSG00000117594	HSD11B1			-0.457948	2.80296e-05	0.218707	0.0315166	6.65755e-06	1	0	1	0
circ3279	circFAT3	chr11	92355404	92352096	+	ENSG00000165323	FAT3	down	down_turquoise	down	hsa.miR.708.5p	up	-0.276348	0.00911154	ENSG00000165449	SLC16A9		1	-0.454801	3.1885e-05	0.12332	0.149301	7.01212e-06	0	0	0	1
circ7234	circNEMF_1	chr14	49795791	49831361	-	ENSG00000165525	NEMF		down_turquoise	down	hsa.miR.450b.5p	up	-0.228948	0.0256873	ENSG00000165675	ENOX2			-0.470165	1.68065e-05	0.150735	0.101519	7.07704e-06	0	0	1	0
circ217	circATRNL1_9	chr10	115315736	115120185	+	ENSG00000107518	ATRNL1	down	down_turquoise	down	hsa.miR.130b.5p	up	-0.298159	0.00520265	ENSG00000185658	BRWD1			-0.419073	0.000127245	0.176735	0.0673574	7.18662e-06	0	0	1	0
circ206	circATRNL1_6	chr10	115268444	115120185	+	ENSG00000107518	ATRNL1	down		down	hsa.miR.363.3p	up	-0.317642	0.00308697	ENSG00000183475	ASB7			-0.411823	0.000165656	0.159631	0.0886654	7.2939e-06	0	0	1	0
circ17709	circSLC4A7_1	chr3	27379249	27424152	-	ENSG00000033867	SLC4A7	down		down	hsa.miR.629.5p	up	-0.197751	0.0467681	ENSG00000107968	MAP3K8			-0.40232	0.000232132	0.305756	0.00426161	7.42591e-06	0	0	1	0
circ219	circATRNL1_10	chr10	115315736	115215697	+	ENSG00000107518	ATRNL1		down_turquoise	down	hsa.miR.708.5p	up	-0.199181	0.0455711	ENSG00000141756	FKBP10		1	-0.47649	1.28054e-05	0.166328	0.0798026	7.46919e-06	0	0	1	0
circ7886	circVRK1	chr14	96860735	96833467	+	ENSG00000100749	VRK1		down_turquoise	down	hsa.miR.450b.5p	up	-0.273195	0.00967881	ENSG00000138760	SCARB2			-0.432247	7.76604e-05	0.181169	0.0625253	7.53022e-06	0	0	1	0
circ206	circATRNL1_6	chr10	115268444	115120185	+	ENSG00000107518	ATRNL1	down		down	hsa.miR.363.3p	up	-0.317642	0.00308697	ENSG00000196387	ZNF140			-0.393928	0.000310307	0.19489	0.0492379	7.55408e-06	0	0	1	0
circ217	circATRNL1_9	chr10	115315736	115120185	+	ENSG00000107518	ATRNL1	down	down_turquoise	down	hsa.miR.130b.5p	up	-0.298159	0.00520265	ENSG00000136237	RAPGEF5			-0.440578	5.62757e-05	0.117116	0.161877	7.58671e-06	0	0	1	0
circ17709	circSLC4A7_1	chr3	27379249	27424152	-	ENSG00000033867	SLC4A7	down		down	hsa.miR.708.5p	up	-0.197115	0.0473089	ENSG00000141756	FKBP10		1	-0.47649	1.28054e-05	0.166718	0.0793082	7.67919e-06	0	0	1	0
circ206	circATRNL1_6	chr10	115268444	115120185	+	ENSG00000107518	ATRNL1	down		down	hsa.let.7g.3p	up	-0.414378	0.000133887	ENSG00000145335	SNCA			-0.309762	0.0039397	0.157356	0.0918346	7.73523e-06	0	0	0	1
circ246	circATRNL1_11	chr10	115469329	115120185	+	ENSG00000107518	ATRNL1	down	down_turquoise	down	hsa.miR.708.5p	up	-0.280353	0.00814435	ENSG00000185650	ZFP36L1		1	-0.452641	3.48101e-05	0.112848	0.170911	7.73718e-06	0	0	0	1
circ206	circATRNL1_6	chr10	115268444	115120185	+	ENSG00000107518	ATRNL1	down		down	hsa.let.7g.3p	up	-0.414378	0.000133887	ENSG00000175161	CADM2			-0.29955	0.00513969	0.173723	0.0707986	7.77474e-06	1	0	0	0
circ7234	circNEMF_1	chr14	49795791	49831361	-	ENSG00000165525	NEMF		down_turquoise	down	hsa.miR.450b.5p	up	-0.228948	0.0256873	ENSG00000136237	RAPGEF5			-0.469055	1.76195e-05	0.146016	0.108854	7.85235e-06	0	0	1	0
circ246	circATRNL1_11	chr10	115469329	115120185	+	ENSG00000107518	ATRNL1	down	down_turquoise	down	hsa.miR.708.5p	up	-0.280353	0.00814435	ENSG00000139644	TMBIM6			-0.446594	4.43799e-05	0.129059	0.138251	7.95181e-06	0	0	1	0
circ206	circATRNL1_6	chr10	115268444	115120185	+	ENSG00000107518	ATRNL1	down		down	hsa.miR.363.3p	up	-0.317642	0.00308697	ENSG00000138744	NAAA			-0.369894	0.000685512	0.233017	0.0236313	7.95707e-06	0	0	1	0
circ206	circATRNL1_6	chr10	115268444	115120185	+	ENSG00000107518	ATRNL1	down		down	hsa.let.7g.3p	up	-0.414378	0.000133887	ENSG00000040731	CDH10			-0.284463	0.00749473	0.192786	0.0511186	8.13869e-06	1	0	0	0
circ27587	circDDX3Y	chrY	12913062	12909360	+	ENSG00000067048	DDX3Y	down		down	hsa.miR.148a.3p	up	-0.340794	0.00158703	ENSG00000180190	TDRP			-0.268668	0.010772	0.318412	0.00302182	8.19005e-06	0	0	0	1
circ206	circATRNL1_6	chr10	115268444	115120185	+	ENSG00000107518	ATRNL1	down		down	hsa.miR.363.3p	up	-0.317642	0.00308697	ENSG00000165813	CCDC186			-0.428854	8.83543e-05	0.103501	0.19177	8.28081e-06	0	0	1	0
circ206	circATRNL1_6	chr10	115268444	115120185	+	ENSG00000107518	ATRNL1	down		down	hsa.let.7g.3p	up	-0.414378	0.000133887	ENSG00000184831	APOO			-0.300568	0.00500717	0.167597	0.0782009	8.29778e-06	0	0	0	1
circ17709	circSLC4A7_1	chr3	27379249	27424152	-	ENSG00000033867	SLC4A7	down		down	hsa.P2.can246.m	up	-0.286893	0.00692985	ENSG00000105939	ZC3HAV1		1	-0.320961	0.00291386	0.323578	0.00261527	8.35167e-06	0	0	0	1
circ7234	circNEMF_1	chr14	49795791	49831361	-	ENSG00000165525	NEMF		down_turquoise	down	hsa.miR.450b.5p	up	-0.228948	0.0256873	ENSG00000135720	DYNC1LI2			-0.416636	0.000139131	0.2545	0.0148964	8.41192e-06	0	0	1	0
circ206	circATRNL1_6	chr10	115268444	115120185	+	ENSG00000107518	ATRNL1	down		down	hsa.miR.363.3p	up	-0.317642	0.00308697	ENSG00000150625	GPM6A			-0.385968	0.000405993	0.202856	0.0426047	8.434e-06	0	0	1	0
circ246	circATRNL1_11	chr10	115469329	115120185	+	ENSG00000107518	ATRNL1	down	down_turquoise	down	hsa.miR.107	up	-0.399377	0.00023242	ENSG00000145725	PPIP5K2	1		-0.31476	0.00344804	0.177096	0.0669536	8.47046e-06	0	1	1	0
circ206	circATRNL1_6	chr10	115268444	115120185	+	ENSG00000107518	ATRNL1	down		down	hsa.miR.363.3p	up	-0.317642	0.00308697	ENSG00000176055	MBLAC2			-0.373349	0.000613794	0.223789	0.0285025	8.51941e-06	0	0	0	1
circ15905	circNRXN1_3	chr2	50472298	50620183	-	ENSG00000179915	NRXN1	down		down	hsa.miR.708.5p	up	-0.216171	0.0331142	ENSG00000165895	ARHGAP42		1	-0.493737	5.94821e-06	0.0704664	0.276788	8.59124e-06	0	0	1	0
circ27587	circDDX3Y	chrY	12913062	12909360	+	ENSG00000067048	DDX3Y	down		down	hsa.miR.148a.3p	up	-0.340794	0.00158703	ENSG00000187772	LIN28B			-0.302714	0.00461878	0.284016	0.00744329	8.59704e-06	0	0	1	0
circ219	circATRNL1_10	chr10	115315736	115215697	+	ENSG00000107518	ATRNL1		down_turquoise	down	hsa.miR.708.5p	up	-0.199181	0.0455711	ENSG00000124762	CDKN1A		1	-0.386092	0.000404324	0.319027	0.00297069	8.62167e-06	0	0	1	0
circ206	circATRNL1_6	chr10	115268444	115120185	+	ENSG00000107518	ATRNL1	down		down	hsa.miR.363.3p	up	-0.317642	0.00308697	ENSG00000127995	CASD1	1		-0.391121	0.00034141	0.19182	0.0520008	8.63122e-06	0	1	1	0
circ15905	circNRXN1_3	chr2	50472298	50620183	-	ENSG00000179915	NRXN1	down		down	hsa.miR.708.5p	up	-0.216171	0.0331142	ENSG00000185650	ZFP36L1		1	-0.452641	3.48101e-05	0.196649	0.0477079	8.65755e-06	0	0	0	1
circ246	circATRNL1_11	chr10	115469329	115120185	+	ENSG00000107518	ATRNL1	down	down_turquoise	down	hsa.miR.107	up	-0.399377	0.00023242	ENSG00000138780	GSTCD			-0.255338	0.0147542	0.250773	0.0161794	8.72583e-06	0	0	1	0
circ206	circATRNL1_6	chr10	115268444	115120185	+	ENSG00000107518	ATRNL1	down		down	hsa.miR.363.3p	up	-0.317642	0.00308697	ENSG00000034693	PEX3			-0.376589	0.000552814	0.216791	0.0327181	8.77492e-06	0	0	1	0
circ17709	circSLC4A7_1	chr3	27379249	27424152	-	ENSG00000033867	SLC4A7	down		down	hsa.miR.708.5p	up	-0.197115	0.0473089	ENSG00000124762	CDKN1A		1	-0.386092	0.000404324	0.319277	0.00295004	8.85782e-06	0	0	1	0
circ206	circATRNL1_6	chr10	115268444	115120185	+	ENSG00000107518	ATRNL1	down		down	hsa.let.7g.3p	up	-0.414378	0.000133887	ENSG00000172348	RCAN2	1		-0.3209	0.00291879	0.12378	0.148395	9.07502e-06	0	1	0	0
circ206	circATRNL1_6	chr10	115268444	115120185	+	ENSG00000107518	ATRNL1	down		down	hsa.miR.363.3p	up	-0.317642	0.00308697	ENSG00000144290	SLC4A10			-0.395409	0.000294966	0.179599	0.0642051	9.1404e-06	1	0	0	0
circ15905	circNRXN1_3	chr2	50472298	50620183	-	ENSG00000179915	NRXN1	down		down	hsa.miR.708.5p	up	-0.216171	0.0331142	ENSG00000168309	FAM107A		1	-0.427373	9.34339e-05	0.24279	0.0192415	9.28876e-06	0	0	1	0
circ246	circATRNL1_11	chr10	115469329	115120185	+	ENSG00000107518	ATRNL1	down	down_turquoise	down	hsa.miR.708.5p	up	-0.280353	0.00814435	ENSG00000135318	NT5E			-0.432309	7.74775e-05	0.155435	0.0945729	9.30854e-06	0	0	1	0
circ206	circATRNL1_6	chr10	115268444	115120185	+	ENSG00000107518	ATRNL1	down		down	hsa.let.7g.3p	up	-0.414378	0.000133887	ENSG00000175455	CCDC14			-0.257559	0.0140436	0.216339	0.0330068	9.6378e-06	0	0	1	0
circ219	circATRNL1_10	chr10	115315736	115215697	+	ENSG00000107518	ATRNL1		down_turquoise	down	hsa.miR.708.5p	up	-0.199181	0.0455711	ENSG00000026508	CD44			-0.413921	0.000153569	0.276676	0.00890422	9.67265e-06	1	0	1	0
circ206	circATRNL1_6	chr10	115268444	115120185	+	ENSG00000107518	ATRNL1	down		down	hsa.miR.363.3p	up	-0.317642	0.00308697	ENSG00000171862	PTEN			-0.395193	0.000297159	0.17617	0.0679935	9.68054e-06	1	0	1	0
circ206	circATRNL1_6	chr10	115268444	115120185	+	ENSG00000107518	ATRNL1	down		down	hsa.miR.363.3p	up	-0.317642	0.00308697	ENSG00000085365	SCAMP1			-0.393188	0.000318248	0.179739	0.0640536	9.75699e-06	0	0	1	0
circ206	circATRNL1_6	chr10	115268444	115120185	+	ENSG00000107518	ATRNL1	down		down	hsa.let.7g.3p	up	-0.414378	0.000133887	ENSG00000143933	CALM2	1		-0.301678	0.00486602	0.153287	0.0977033	9.85669e-06	0	1	1	0
circ246	circATRNL1_11	chr10	115469329	115120185	+	ENSG00000107518	ATRNL1	down	down_turquoise	down	hsa.miR.708.5p	up	-0.280353	0.00814435	ENSG00000153904	DDAH1			-0.45622	3.0089e-05	0.0753585	0.263154	9.97107e-06	0	0	1	0
circ17709	circSLC4A7_1	chr3	27379249	27424152	-	ENSG00000033867	SLC4A7	down		down	hsa.miR.708.5p	up	-0.197115	0.0473089	ENSG00000026508	CD44			-0.413921	0.000153569	0.276802	0.00887713	9.97199e-06	1	0	1	0
circ20464	circPPP2R2B	chr5	146691128	146701142	-	ENSG00000156475	PPP2R2B	up		up	hsa.miR.204.3p	down	-0.260596	0.0129827	ENSG00000117594	HSD11B1			-0.42475	0.000103095	0.193995	0.050031	1.03098e-05	1	0	0	0
circ206	circATRNL1_6	chr10	115268444	115120185	+	ENSG00000107518	ATRNL1	down		down	hsa.let.7g.3p	up	-0.414378	0.000133887	ENSG00000004866	ST7			-0.315963	0.00333809	0.123032	0.149871	1.03121e-05	1	0	0	0
circ246	circATRNL1_11	chr10	115469329	115120185	+	ENSG00000107518	ATRNL1	down	down_turquoise	down	hsa.miR.107	up	-0.399377	0.00023242	ENSG00000203943	SAMD13			-0.323923	0.00268566	0.146027	0.108836	1.04422e-05	0	0	0	1
circ206	circATRNL1_6	chr10	115268444	115120185	+	ENSG00000107518	ATRNL1	down		down	hsa.miR.363.3p	up	-0.317642	0.00308697	ENSG00000107036	RIC1			-0.422652	0.000111479	0.100835	0.197987	1.04692e-05	0	0	1	0
circ15905	circNRXN1_3	chr2	50472298	50620183	-	ENSG00000179915	NRXN1	down		down	hsa.miR.708.5p	up	-0.216171	0.0331142	ENSG00000153944	MSI2			-0.463686	2.20926e-05	0.156179	0.0935052	1.05063e-05	0	0	1	0
circ217	circATRNL1_9	chr10	115315736	115120185	+	ENSG00000107518	ATRNL1	down	down_turquoise	down	hsa.miR.708.5p	up	-0.296191	0.00547408	ENSG00000153904	DDAH1			-0.45622	3.0089e-05	0.0234833	0.421833	1.06523e-05	0	0	1	0
circ206	circATRNL1_6	chr10	115268444	115120185	+	ENSG00000107518	ATRNL1	down		down	hsa.miR.363.3p	up	-0.317642	0.00308697	ENSG00000100934	SEC23A	1		-0.389023	0.000366481	0.182187	0.0614545	1.06583e-05	0	1	1	0
circ206	circATRNL1_6	chr10	115268444	115120185	+	ENSG00000107518	ATRNL1	down		down	hsa.miR.363.3p	up	-0.317642	0.00308697	ENSG00000135298	ADGRB3			-0.374121	0.000598746	0.209122	0.0379006	1.07299e-05	0	0	0	1
circ206	circATRNL1_6	chr10	115268444	115120185	+	ENSG00000107518	ATRNL1	down		down	hsa.let.7g.3p	up	-0.414378	0.000133887	ENSG00000184408	KCND2			-0.314174	0.00350275	0.123172	0.149593	1.07439e-05	1	0	0	0
circ3279	circFAT3	chr11	92355404	92352096	+	ENSG00000165323	FAT3	down	down_turquoise	down	hsa.miR.708.5p	up	-0.276348	0.00911154	ENSG00000148730	EIF4EBP2			-0.374522	0.000591054	0.260259	0.0130829	1.07848e-05	1	0	1	0
circ9676	circPHKB_2	chr16	47596531	47497399	+	ENSG00000102893	PHKB		down_turquoise	down	hsa.miR.708.5p	up	-0.215193	0.0337479	ENSG00000101938	CHRDL1		1	-0.49349	6.01545e-06	0.0456621	0.350339	1.0875e-05	0	0	0	1
circ27587	circDDX3Y	chrY	12913062	12909360	+	ENSG00000067048	DDX3Y	down		down	hsa.miR.148a.3p	up	-0.340794	0.00158703	ENSG00000125772	GPCPD1	1		-0.403002	0.000203896	0.089894	0.224725	1.1091e-05	0	1	1	0
circ206	circATRNL1_6	chr10	115268444	115120185	+	ENSG00000107518	ATRNL1	down		down	hsa.miR.363.3p	up	-0.317642	0.00308697	ENSG00000066739	ATG2B	1		-0.411792	0.00016584	0.127022	0.142109	1.10954e-05	0	1	1	0
circ217	circATRNL1_9	chr10	115315736	115120185	+	ENSG00000107518	ATRNL1	down	down_turquoise	down	hsa.miR.130b.5p	up	-0.298159	0.00520265	ENSG00000144228	SPOPL			-0.417685	0.000133896	0.146942	0.107386	1.13725e-05	0	0	1	0
circ17709	circSLC4A7_1	chr3	27379249	27424152	-	ENSG00000033867	SLC4A7	down		down	hsa.miR.629.5p	up	-0.197751	0.0467681	ENSG00000168309	FAM107A		1	-0.431013	8.14024e-05	0.241655	0.0197137	1.14054e-05	0	0	0	1
circ206	circATRNL1_6	chr10	115268444	115120185	+	ENSG00000107518	ATRNL1	down		down	hsa.miR.363.3p	up	-0.317642	0.00308697	ENSG00000077254	USP33	1		-0.390565	0.000347889	0.173878	0.0706174	1.15112e-05	0	1	1	0
circ206	circATRNL1_6	chr10	115268444	115120185	+	ENSG00000107518	ATRNL1	down		down	hsa.let.7g.3p	up	-0.414378	0.000133887	ENSG00000145681	HAPLN1			-0.25651	0.0143755	0.206737	0.0396395	1.15725e-05	0	0	0	1
circ206	circATRNL1_6	chr10	115268444	115120185	+	ENSG00000107518	ATRNL1	down		down	hsa.let.7g.3p	up	-0.414378	0.000133887	ENSG00000077254	USP33	1		-0.280205	0.00830907	0.173878	0.0706174	1.18763e-05	0	1	0	0
circ15905	circNRXN1_3	chr2	50472298	50620183	-	ENSG00000179915	NRXN1	down		down	hsa.miR.629.5p	up	-0.30334	0.0045432	ENSG00000173905	GOLIM4			-0.422991	0.000110082	0.119086	0.157812	1.19252e-05	0	0	1	0
circ19323	circGRK4	chr4	3029409	2984513	+	ENSG00000125388	GRK4	down		down	hsa.miR.450b.5p	up	-0.198287	0.046317	ENSG00000165675	ENOX2			-0.470165	1.68065e-05	0.150427	0.101987	1.19872e-05	0	0	1	0
circ19215	circPACRGL	chr4	20713539	20704466	+	ENSG00000163138	PACRGL		down_turquoise	down	hsa.miR.491.5p	up_DE module_yellow	-0.226898	0.0267775	ENSG00000165449	SLC16A9		1	-0.467666	1.86874e-05	0.117851	0.160355	1.2101e-05	0	0	1	0
circ206	circATRNL1_6	chr10	115268444	115120185	+	ENSG00000107518	ATRNL1	down		down	hsa.let.7g.3p	up	-0.414378	0.000133887	ENSG00000070961	ATP2B1	1		-0.300012	0.00507908	0.139602	0.119409	1.22289e-05	0	1	1	0
circ206	circATRNL1_6	chr10	115268444	115120185	+	ENSG00000107518	ATRNL1	down		down	hsa.let.7g.3p	up	-0.414378	0.000133887	ENSG00000086717	PPEF1			-0.283074	0.00775233	0.167565	0.07824	1.22299e-05	0	0	0	1
circ7234	circNEMF_1	chr14	49795791	49831361	-	ENSG00000165525	NEMF		down_turquoise	down	hsa.miR.450b.5p	up	-0.228948	0.0256873	ENSG00000164176	EDIL3			-0.419999	0.000122982	0.228687	0.0258241	1.22795e-05	0	0	1	0
circ217	circATRNL1_9	chr10	115315736	115120185	+	ENSG00000107518	ATRNL1	down	down_turquoise	down	hsa.miR.130b.5p	up	-0.298159	0.00520265	ENSG00000116754	SRSF11			-0.406825	0.000198054	0.166049	0.0801593	1.24148e-05	1	0	1	0
circ246	circATRNL1_11	chr10	115469329	115120185	+	ENSG00000107518	ATRNL1	down	down_turquoise	down	hsa.miR.363.3p	up	-0.222003	0.0295342	ENSG00000164828	SUN1			-0.46236	2.33504e-05	0.139348	0.119841	1.24214e-05	0	0	1	0
circ219	circATRNL1_10	chr10	115315736	115215697	+	ENSG00000107518	ATRNL1		down_turquoise	down	hsa.miR.708.5p	up	-0.199181	0.0455711	ENSG00000168309	FAM107A		1	-0.427373	9.34339e-05	0.242212	0.0194809	1.24614e-05	0	0	1	0
circ219	circATRNL1_10	chr10	115315736	115215697	+	ENSG00000107518	ATRNL1		down_turquoise	down	hsa.miR.708.5p	up	-0.199181	0.0455711	ENSG00000165449	SLC16A9		1	-0.454801	3.1885e-05	0.186293	0.0572755	1.24981e-05	0	0	0	1
circ217	circATRNL1_9	chr10	115315736	115120185	+	ENSG00000107518	ATRNL1	down	down_turquoise	down	hsa.miR.130b.5p	up	-0.298159	0.00520265	ENSG00000135525	MAP7			-0.397877	0.000270931	0.1842	0.0593774	1.25608e-05	0	0	0	1
circ217	circATRNL1_9	chr10	115315736	115120185	+	ENSG00000107518	ATRNL1	down	down_turquoise	down	hsa.miR.130b.5p	up	-0.298159	0.00520265	ENSG00000134900	TPP2	1		-0.424843	0.000102739	0.1194	0.157172	1.26027e-05	0	1	1	0
circ206	circATRNL1_6	chr10	115268444	115120185	+	ENSG00000107518	ATRNL1	down		down	hsa.let.7g.3p	up	-0.414378	0.000133887	ENSG00000175426	PCSK1			-0.297668	0.00539275	0.141285	0.116573	1.26235e-05	0	0	1	0
circ217	circATRNL1_9	chr10	115315736	115120185	+	ENSG00000107518	ATRNL1	down	down_turquoise	down	hsa.miR.130b.5p	up	-0.298159	0.00520265	ENSG00000175155	YPEL2			-0.394052	0.000309001	0.190045	0.0536516	1.28996e-05	0	0	0	1
circ17709	circSLC4A7_1	chr3	27379249	27424152	-	ENSG00000033867	SLC4A7	down		down	hsa.miR.708.5p	up	-0.197115	0.0473089	ENSG00000165449	SLC16A9		1	-0.454801	3.1885e-05	0.186124	0.0574434	1.29523e-05	0	0	0	1
circ17709	circSLC4A7_1	chr3	27379249	27424152	-	ENSG00000033867	SLC4A7	down		down	hsa.miR.708.5p	up	-0.197115	0.0473089	ENSG00000168309	FAM107A		1	-0.427373	9.34339e-05	0.241655	0.0197137	1.3017e-05	0	0	1	0
circ217	circATRNL1_9	chr10	115315736	115120185	+	ENSG00000107518	ATRNL1	down	down_turquoise	down	hsa.miR.130b.5p	up	-0.298159	0.00520265	ENSG00000075651	PLD1			-0.370819	0.000665592	0.229926	0.0251805	1.30244e-05	0	0	0	1
circ206	circATRNL1_6	chr10	115268444	115120185	+	ENSG00000107518	ATRNL1	down		down	hsa.miR.363.3p	up	-0.317642	0.00308697	ENSG00000082269	FAM135A			-0.369462	0.000694991	0.205116	0.0408573	1.30852e-05	0	0	1	0
circ15905	circNRXN1_3	chr2	50472298	50620183	-	ENSG00000179915	NRXN1	down		down	hsa.miR.629.5p	up	-0.30334	0.0045432	ENSG00000188647	PTAR1		1	-0.439189	5.94112e-05	0.0539809	0.325064	1.30963e-05	0	0	1	0
circ217	circATRNL1_9	chr10	115315736	115120185	+	ENSG00000107518	ATRNL1	down	down_turquoise	down	hsa.miR.130b.5p	up	-0.298159	0.00520265	ENSG00000142892	PIGK			-0.381772	0.00046661	0.211467	0.0362504	1.31308e-05	0	0	1	0
circ206	circATRNL1_6	chr10	115268444	115120185	+	ENSG00000107518	ATRNL1	down		down	hsa.let.7g.3p	up	-0.414378	0.000133887	ENSG00000151917	BEND6			-0.298593	0.00526696	0.136141	0.125387	1.3186e-05	0	0	0	1
circ206	circATRNL1_6	chr10	115268444	115120185	+	ENSG00000107518	ATRNL1	down		down	hsa.let.7g.3p	up	-0.414378	0.000133887	ENSG00000131966	ACTR10			-0.259348	0.0134925	0.194844	0.0492791	1.32653e-05	0	0	0	1
circ206	circATRNL1_6	chr10	115268444	115120185	+	ENSG00000107518	ATRNL1	down		down	hsa.miR.363.3p	up	-0.317642	0.00308697	ENSG00000175161	CADM2			-0.385598	0.000411037	0.173723	0.0707986	1.33722e-05	1	0	0	0
circ206	circATRNL1_6	chr10	115268444	115120185	+	ENSG00000107518	ATRNL1	down		down	hsa.miR.363.3p	up	-0.317642	0.00308697	ENSG00000143669	LYST			-0.391583	0.000336094	0.161065	0.0867097	1.33892e-05	0	0	1	0
circ3279	circFAT3	chr11	92355404	92352096	+	ENSG00000165323	FAT3	down	down_turquoise	down	hsa.miR.708.5p	up	-0.276348	0.00911154	ENSG00000153904	DDAH1			-0.45622	3.0089e-05	0.0501542	0.336736	1.36988e-05	0	0	1	0
circ8229	circMGA_1	chr15	41669958	41668828	+	ENSG00000174197	MGA		down_turquoise	down	hsa.miR.450b.5p	up	-0.221453	0.0298575	ENSG00000117594	HSD11B1			-0.457948	2.80296e-05	0.144824	0.110764	1.37485e-05	1	0	1	0
circ5511	circARID1A	chr1	26732792	26729651	+	ENSG00000117713	ARID1A	up		up	hsa.miR.204.3p	down	-0.37186	0.000599038	ENSG00000078269	SYNJ2			-0.340553	0.00167513	0.156376	0.0932237	1.38598e-05	0	0	1	0
circ15905	circNRXN1_3	chr2	50472298	50620183	-	ENSG00000179915	NRXN1	down		down	hsa.miR.629.5p	up	-0.30334	0.0045432	ENSG00000003402	CFLAR			-0.268697	0.0109027	0.334793	0.00189489	1.39007e-05	0	0	1	0
circ5511	circARID1A	chr1	26732792	26729651	+	ENSG00000117713	ARID1A	up		up	hsa.miR.204.3p	down	-0.37186	0.000599038	ENSG00000035928	RFC1			-0.347279	0.00137442	0.142751	0.114142	1.3916e-05	0	0	0	1
circ206	circATRNL1_6	chr10	115268444	115120185	+	ENSG00000107518	ATRNL1	down		down	hsa.let.7g.3p	up	-0.414378	0.000133887	ENSG00000085365	SCAMP1			-0.26808	0.0110594	0.179739	0.0640536	1.40297e-05	0	0	1	0
circ206	circATRNL1_6	chr10	115268444	115120185	+	ENSG00000107518	ATRNL1	down		down	hsa.let.7g.3p	up	-0.414378	0.000133887	ENSG00000070159	PTPN3			-0.328243	0.00238129	0.062007	0.301133	1.41816e-05	0	0	1	0
circ206	circATRNL1_6	chr10	115268444	115120185	+	ENSG00000107518	ATRNL1	down		down	hsa.let.7g.3p	up	-0.414378	0.000133887	ENSG00000256223	ZNF10			-0.232506	0.023987	0.221124	0.0300526	1.42479e-05	0	0	0	1
circ206	circATRNL1_6	chr10	115268444	115120185	+	ENSG00000107518	ATRNL1	down		down	hsa.let.7g.3p	up	-0.414378	0.000133887	ENSG00000138757	G3BP2			-0.263884	0.0121773	0.184338	0.0592372	1.42562e-05	0	0	1	0
circ206	circATRNL1_6	chr10	115268444	115120185	+	ENSG00000107518	ATRNL1	down		down	hsa.let.7g.3p	up	-0.414378	0.000133887	ENSG00000255302	EID1			-0.226274	0.0272088	0.226486	0.0270012	1.44886e-05	0	0	1	0
circ27587	circDDX3Y	chrY	12913062	12909360	+	ENSG00000067048	DDX3Y	down		down	hsa.chr5.14497.s	up	-0.242594	0.0193225	ENSG00000129003	VPS13C			-0.388594	0.000340134	0.253883	0.0151026	1.4605e-05	0	0	0	1
circ246	circATRNL1_11	chr10	115469329	115120185	+	ENSG00000107518	ATRNL1	down	down_turquoise	down	hsa.miR.708.5p	up	-0.280353	0.00814435	ENSG00000171766	GATM			-0.417808	0.000133292	0.157398	0.091775	1.46533e-05	1	0	1	0
circ206	circATRNL1_6	chr10	115268444	115120185	+	ENSG00000107518	ATRNL1	down		down	hsa.miR.363.3p	up	-0.317642	0.00308697	ENSG00000168300	PCMTD1			-0.365852	0.000778976	0.203822	0.0418504	1.47841e-05	0	0	1	0
circ206	circATRNL1_6	chr10	115268444	115120185	+	ENSG00000107518	ATRNL1	down		down	hsa.miR.363.3p	up	-0.317642	0.00308697	ENSG00000067208	EVI5			-0.390288	0.000351171	0.156249	0.0934051	1.48645e-05	0	0	1	0
circ17709	circSLC4A7_1	chr3	27379249	27424152	-	ENSG00000033867	SLC4A7	down		down	hsa.miR.629.5p	up	-0.197751	0.0467681	ENSG00000075420	FNDC3B		1	-0.408336	0.000187689	0.265407	0.011623	1.49642e-05	0	0	1	0
circ246	circATRNL1_11	chr10	115469329	115120185	+	ENSG00000107518	ATRNL1	down	down_turquoise	down	hsa.miR.130b.5p	up	-0.286115	0.00706556	ENSG00000113580	NR3C1			-0.418148	0.000131644	0.144886	0.110664	1.50818e-05	0	0	1	0
circ20464	circPPP2R2B	chr5	146691128	146701142	-	ENSG00000156475	PPP2R2B	up		up	hsa.miR.204.3p	down	-0.260596	0.0129827	ENSG00000115365	LANCL1	1		-0.429964	8.47133e-05	0.155022	0.0951689	1.53061e-05	0	0	0	1
circ5511	circARID1A	chr1	26732792	26729651	+	ENSG00000117713	ARID1A	up		up	hsa.miR.204.3p	down	-0.37186	0.000599038	ENSG00000117859	OSBPL9			-0.372239	0.000636067	0.071018	0.275234	1.53324e-05	0	0	1	0
circ246	circATRNL1_11	chr10	115469329	115120185	+	ENSG00000107518	ATRNL1	down	down_turquoise	down	hsa.miR.148a.3p	up	-0.358576	0.000919439	ENSG00000123570	RAB9B			-0.311384	0.00366392	0.219026	0.0313206	1.54149e-05	0	0	0	1
circ246	circATRNL1_11	chr10	115469329	115120185	+	ENSG00000107518	ATRNL1	down	down_turquoise	down	hsa.miR.107	up	-0.399377	0.00023242	ENSG00000188811	NHLRC3			-0.273201	0.00981496	0.197475	0.0470026	1.56355e-05	0	0	1	0
circ21473	circATG5	chr6	106248150	106308491	-	ENSG00000057663	ATG5	down	down_turquoise	down	hsa.miR.450b.5p	up	-0.202514	0.0428739	ENSG00000117594	HSD11B1			-0.457948	2.80296e-05	0.159094	0.089406	1.56639e-05	1	0	1	0
circ206	circATRNL1_6	chr10	115268444	115120185	+	ENSG00000107518	ATRNL1	down		down	hsa.miR.363.3p	up	-0.317642	0.00308697	ENSG00000175497	DPP10			-0.360916	0.000908691	0.208498	0.0383492	1.56807e-05	1	0	0	0
circ206	circATRNL1_6	chr10	115268444	115120185	+	ENSG00000107518	ATRNL1	down		down	hsa.let.7g.3p	up	-0.414378	0.000133887	ENSG00000126945	HNRNPH2			-0.231457	0.0245061	0.216588	0.0328472	1.57065e-05	0	0	1	0
circ206	circATRNL1_6	chr10	115268444	115120185	+	ENSG00000107518	ATRNL1	down		down	hsa.miR.363.3p	up	-0.317642	0.00308697	ENSG00000152443	ZNF776			-0.410002	0.000176844	0.10029	0.199274	1.58367e-05	0	0	1	0
circ219	circATRNL1_10	chr10	115315736	115215697	+	ENSG00000107518	ATRNL1		down_turquoise	down	hsa.miR.708.5p	up	-0.199181	0.0455711	ENSG00000153944	MSI2			-0.463686	2.20926e-05	0.146147	0.108646	1.59133e-05	0	0	1	0
circ27587	circDDX3Y	chrY	12913062	12909360	+	ENSG00000067048	DDX3Y	down		down	hsa.chr5.14497.s	up	-0.242594	0.0193225	ENSG00000205268	PDE7A			-0.421483	0.000102167	0.1875	0.0560895	1.6086e-05	0	0	0	1
circ206	circATRNL1_6	chr10	115268444	115120185	+	ENSG00000107518	ATRNL1	down		down	hsa.let.7g.3p	up	-0.414378	0.000133887	ENSG00000169282	KCNAB1	1		-0.263267	0.0123496	0.176746	0.0673448	1.61659e-05	0	1	0	0
circ27587	circDDX3Y	chrY	12913062	12909360	+	ENSG00000067048	DDX3Y	down		down	hsa.miR.148a.3p	up	-0.340794	0.00158703	ENSG00000162929	KIAA1841	1		-0.32027	0.00286961	0.231105	0.0245801	1.62416e-05	0	1	0	0
circ17709	circSLC4A7_1	chr3	27379249	27424152	-	ENSG00000033867	SLC4A7	down		down	hsa.miR.708.5p	up	-0.197115	0.0473089	ENSG00000153944	MSI2			-0.463686	2.20926e-05	0.146567	0.107979	1.63587e-05	0	0	1	0
circ3279	circFAT3	chr11	92355404	92352096	+	ENSG00000165323	FAT3	down	down_turquoise	down	hsa.miR.708.5p	up	-0.276348	0.00911154	ENSG00000148411	NACC2			-0.320992	0.0029114	0.305701	0.00426785	1.64045e-05	0	0	1	0
circ16286	circZNF638_2	chr2	71427414	71426460	+	ENSG00000075292	ZNF638	down		down	hsa.miR.766.3p	up	-0.311524	0.00365004	ENSG00000135069	PSAT1			-0.42404	0.000105864	0.0647804	0.293047	1.64072e-05	0	0	1	0
circ217	circATRNL1_9	chr10	115315736	115120185	+	ENSG00000107518	ATRNL1	down	down_turquoise	down	hsa.chr5.14497.s	up	-0.251479	0.0159295	ENSG00000064651	SLC12A2	1		-0.409682	0.000159563	0.200278	0.0446686	1.64458e-05	0	1	0	0
circ206	circATRNL1_6	chr10	115268444	115120185	+	ENSG00000107518	ATRNL1	down		down	hsa.miR.363.3p	up	-0.317642	0.00308697	ENSG00000153237	CCDC148			-0.372609	0.000628562	0.183808	0.0597777	1.6759e-05	0	0	0	1
circ246	circATRNL1_11	chr10	115469329	115120185	+	ENSG00000107518	ATRNL1	down	down_turquoise	down	hsa.miR.107	up	-0.399377	0.00023242	ENSG00000164338	UTP15			-0.256911	0.0142478	0.212886	0.0352805	1.68661e-05	0	0	1	0
circ206	circATRNL1_6	chr10	115268444	115120185	+	ENSG00000107518	ATRNL1	down		down	hsa.miR.363.3p	up	-0.317642	0.00308697	ENSG00000141040	ZNF287			-0.35493	0.00109195	0.213034	0.0351803	1.70896e-05	0	0	1	0
circ206	circATRNL1_6	chr10	115268444	115120185	+	ENSG00000107518	ATRNL1	down		down	hsa.miR.363.3p	up	-0.317642	0.00308697	ENSG00000126821	SGPP1			-0.372979	0.000621138	0.181657	0.0620104	1.71296e-05	0	0	1	0
circ5511	circARID1A	chr1	26732792	26729651	+	ENSG00000117713	ARID1A	up		up	hsa.miR.204.3p	down	-0.37186	0.000599038	ENSG00000154642	C21orf91			-0.283259	0.00771754	0.228855	0.0257362	1.71398e-05	0	0	0	1
circ206	circATRNL1_6	chr10	115268444	115120185	+	ENSG00000107518	ATRNL1	down		down	hsa.let.7g.3p	up	-0.414378	0.000133887	ENSG00000196950	SLC39A10	1		-0.278169	0.00872482	0.150357	0.102094	1.71753e-05	0	1	1	0
circ206	circATRNL1_6	chr10	115268444	115120185	+	ENSG00000107518	ATRNL1	down		down	hsa.miR.363.3p	up	-0.317642	0.00308697	ENSG00000132872	SYT4			-0.387079	0.000391197	0.152446	0.0989504	1.72049e-05	0	0	0	1
circ219	circATRNL1_10	chr10	115315736	115215697	+	ENSG00000107518	ATRNL1		down_turquoise	down	hsa.miR.708.5p	up	-0.199181	0.0455711	ENSG00000007372	PAX6			-0.476398	1.28569e-05	0.0982384	0.204157	1.72205e-05	1	0	1	0
circ246	circATRNL1_11	chr10	115469329	115120185	+	ENSG00000107518	ATRNL1	down	down_turquoise	down	hsa.miR.107	up	-0.399377	0.00023242	ENSG00000135469	COQ10A			-0.225873	0.0274277	0.24377	0.0188416	1.72832e-05	0	0	1	0
circ206	circATRNL1_6	chr10	115268444	115120185	+	ENSG00000107518	ATRNL1	down		down	hsa.let.7g.3p	up	-0.414378	0.000133887	ENSG00000204899	MZT1			-0.26012	0.0132607	0.176326	0.0678177	1.73207e-05	0	0	0	1
circ206	circATRNL1_6	chr10	115268444	115120185	+	ENSG00000107518	ATRNL1	down		down	hsa.let.7g.3p	up	-0.414378	0.000133887	ENSG00000165338	HECTD2			-0.263976	0.0121517	0.170776	0.0742899	1.73791e-05	0	0	0	1
circ217	circATRNL1_9	chr10	115315736	115120185	+	ENSG00000107518	ATRNL1	down	down_turquoise	down	hsa.miR.130b.5p	up	-0.298159	0.00520265	ENSG00000085832	EPS15	1		-0.397877	0.000270931	0.161709	0.0858422	1.73961e-05	0	1	1	0
circ217	circATRNL1_9	chr10	115315736	115120185	+	ENSG00000107518	ATRNL1	down	down_turquoise	down	hsa.miR.130b.5p	up	-0.298159	0.00520265	ENSG00000162702	ZNF281			-0.418703	0.000128988	0.108502	0.180425	1.74063e-05	0	0	1	0
circ217	circATRNL1_9	chr10	115315736	115120185	+	ENSG00000107518	ATRNL1	down	down_turquoise	down	hsa.miR.130b.5p	up	-0.298159	0.00520265	ENSG00000135333	EPHA7			-0.377083	0.000544021	0.202497	0.0428874	1.74452e-05	0	0	1	0
circ8229	circMGA_1	chr15	41669958	41668828	+	ENSG00000174197	MGA		down_turquoise	down	hsa.miR.450b.5p	up	-0.221453	0.0298575	ENSG00000165675	ENOX2			-0.470165	1.68065e-05	0.0830916	0.24231	1.7471e-05	0	0	1	0
circ206	circATRNL1_6	chr10	115268444	115120185	+	ENSG00000107518	ATRNL1	down		down	hsa.miR.148a.3p	up	-0.332569	0.00202179	ENSG00000089123	TASP1			-0.318557	0.00300965	0.240733	0.0201042	1.75649e-05	0	0	1	0
circ246	circATRNL1_11	chr10	115469329	115120185	+	ENSG00000107518	ATRNL1	down	down_turquoise	down	hsa.miR.130b.5p	up	-0.286115	0.00706556	ENSG00000189180	ZNF33A			-0.390935	0.000343557	0.19331	0.0506455	1.76417e-05	0	0	0	1
circ206	circATRNL1_6	chr10	115268444	115120185	+	ENSG00000107518	ATRNL1	down		down	hsa.miR.363.3p	up	-0.317642	0.00308697	ENSG00000136925	TSTD2			-0.346939	0.00138834	0.2234	0.028725	1.76633e-05	0	0	1	0
circ246	circATRNL1_11	chr10	115469329	115120185	+	ENSG00000107518	ATRNL1	down	down_turquoise	down	hsa.miR.708.5p	up	-0.280353	0.00814435	ENSG00000101888	NXT2			-0.407565	0.000192913	0.167372	0.0784831	1.76887e-05	0	0	1	0
circ5511	circARID1A	chr1	26732792	26729651	+	ENSG00000117713	ARID1A	up		up	hsa.miR.204.3p	down	-0.37186	0.000599038	ENSG00000185010	F8			-0.326978	0.00246708	0.163395	0.0836	1.77192e-05	0	0	0	1
circ206	circATRNL1_6	chr10	115268444	115120185	+	ENSG00000107518	ATRNL1	down		down	hsa.let.7g.3p	up	-0.414378	0.000133887	ENSG00000131100	ATP6V1E1	1		-0.244786	0.0185586	0.194329	0.049734	1.77225e-05	0	0	1	0
circ17709	circSLC4A7_1	chr3	27379249	27424152	-	ENSG00000033867	SLC4A7	down		down	hsa.miR.708.5p	up	-0.197115	0.0473089	ENSG00000007372	PAX6			-0.476398	1.28569e-05	0.0983013	0.204006	1.77869e-05	1	0	1	0
circ206	circATRNL1_6	chr10	115268444	115120185	+	ENSG00000107518	ATRNL1	down		down	hsa.let.7g.3p	up	-0.414378	0.000133887	ENSG00000117114	ADGRL2			-0.235715	0.0224554	0.204352	0.0414413	1.7851e-05	0	0	0	1
circ246	circATRNL1_11	chr10	115469329	115120185	+	ENSG00000107518	ATRNL1	down	down_turquoise	down	hsa.miR.130b.5p	up	-0.286115	0.00706556	ENSG00000116754	SRSF11			-0.406825	0.000198054	0.15843	0.0903281	1.80794e-05	1	0	1	0
circ206	circATRNL1_6	chr10	115268444	115120185	+	ENSG00000107518	ATRNL1	down		down	hsa.miR.363.3p	up	-0.317642	0.00308697	ENSG00000100526	CDKN3			-0.329045	0.00232827	0.246906	0.0176076	1.80982e-05	0	0	0	1
circ7234	circNEMF_1	chr14	49795791	49831361	-	ENSG00000165525	NEMF		down_turquoise	down	hsa.miR.450b.5p	up	-0.228948	0.0256873	ENSG00000001084	GCLC			-0.391491	0.000337151	0.254661	0.0148431	1.835e-05	0	0	1	0
circ206	circATRNL1_6	chr10	115268444	115120185	+	ENSG00000107518	ATRNL1	down		down	hsa.miR.363.3p	up	-0.317642	0.00308697	ENSG00000198168	SVIP			-0.37264	0.000627941	0.177651	0.0663374	1.83552e-05	0	0	1	0
circ7886	circVRK1	chr14	96860735	96833467	+	ENSG00000100749	VRK1		down_turquoise	down	hsa.miR.450b.5p	up	-0.273195	0.00967881	ENSG00000126803	HSPA2			-0.448291	4.14736e-05	0.0538848	0.325355	1.86082e-05	0	0	1	0
circ15905	circNRXN1_3	chr2	50472298	50620183	-	ENSG00000179915	NRXN1	down		down	hsa.miR.629.5p	up	-0.30334	0.0045432	ENSG00000141574	SECTM1			-0.391059	0.000342124	0.1625	0.0847846	1.87566e-05	0	0	1	0
circ217	circATRNL1_9	chr10	115315736	115120185	+	ENSG00000107518	ATRNL1	down	down_turquoise	down	hsa.miR.130b.5p	up	-0.298159	0.00520265	ENSG00000132294	EFR3A			-0.367518	0.000739135	0.213896	0.0346027	1.8917e-05	1	0	1	0
circ206	circATRNL1_6	chr10	115268444	115120185	+	ENSG00000107518	ATRNL1	down		down	hsa.miR.363.3p	up	-0.317642	0.00308697	ENSG00000180998	GPR137C	1		-0.385629	0.000410615	0.148206	0.105405	1.89852e-05	0	1	1	0
circ15905	circNRXN1_3	chr2	50472298	50620183	-	ENSG00000179915	NRXN1	down		down	hsa.miR.629.5p	up	-0.30334	0.0045432	ENSG00000139132	FGD4		1	-0.401456	0.000239252	0.136811	0.124213	1.91616e-05	0	0	1	0
circ15905	circNRXN1_3	chr2	50472298	50620183	-	ENSG00000179915	NRXN1	down		down	hsa.miR.708.5p	up	-0.216171	0.0331142	ENSG00000141756	FKBP10		1	-0.47649	1.28054e-05	0.0559021	0.319266	1.92073e-05	0	0	1	0
circ206	circATRNL1_6	chr10	115268444	115120185	+	ENSG00000107518	ATRNL1	down		down	hsa.let.7g.3p	up	-0.414378	0.000133887	ENSG00000090989	EXOC1			-0.200296	0.0446643	0.235028	0.0226664	1.92276e-05	0	0	1	0
circ27587	circDDX3Y	chrY	12913062	12909360	+	ENSG00000067048	DDX3Y	down		down	hsa.miR.148a.3p	up	-0.340794	0.00158703	ENSG00000163138	PACRGL			-0.262713	0.0123686	0.28701	0.00690968	1.92386e-05	0	0	1	0
circ206	circATRNL1_6	chr10	115268444	115120185	+	ENSG00000107518	ATRNL1	down		down	hsa.let.7g.3p	up	-0.414378	0.000133887	ENSG00000014641	MDH1			-0.271535	0.0102059	0.152071	0.0995083	1.9281e-05	0	0	1	0
circ21473	circATG5	chr6	106248150	106308491	-	ENSG00000057663	ATG5	down	down_turquoise	down	hsa.miR.450b.5p	up	-0.202514	0.0428739	ENSG00000165675	ENOX2			-0.470165	1.68065e-05	0.104601	0.189239	1.93293e-05	0	0	1	0
circ206	circATRNL1_6	chr10	115268444	115120185	+	ENSG00000107518	ATRNL1	down		down	hsa.miR.363.3p	up	-0.317642	0.00308697	ENSG00000077232	DNAJC10			-0.350179	0.00126043	0.212754	0.03537	1.94871e-05	0	0	1	0
circ246	circATRNL1_11	chr10	115469329	115120185	+	ENSG00000107518	ATRNL1	down	down_turquoise	down	hsa.miR.130b.5p	up	-0.286115	0.00706556	ENSG00000134900	TPP2	1		-0.424843	0.000102739	0.104376	0.189755	1.95026e-05	0	1	1	0
circ5511	circARID1A	chr1	26732792	26729651	+	ENSG00000117713	ARID1A	up		up	hsa.miR.204.3p	down	-0.37186	0.000599038	ENSG00000073417	PDE8A			-0.288998	0.00670421	0.214118	0.0344551	1.9581e-05	0	0	0	1
circ206	circATRNL1_6	chr10	115268444	115120185	+	ENSG00000107518	ATRNL1	down		down	hsa.miR.363.3p	up	-0.317642	0.00308697	ENSG00000058272	PPP1R12A			-0.377206	0.000541843	0.163824	0.0830362	1.96454e-05	0	0	1	0
circ217	circATRNL1_9	chr10	115315736	115120185	+	ENSG00000107518	ATRNL1	down	down_turquoise	down	hsa.miR.130b.5p	up	-0.298159	0.00520265	ENSG00000168214	RBPJ			-0.402228	0.000232886	0.14066	0.117621	2.00961e-05	0	0	1	0
circ217	circATRNL1_9	chr10	115315736	115120185	+	ENSG00000107518	ATRNL1	down	down_turquoise	down	hsa.miR.130b.5p	up	-0.298159	0.00520265	ENSG00000189180	ZNF33A			-0.390935	0.000343557	0.165417	0.0809686	2.03706e-05	0	0	0	1
circ246	circATRNL1_11	chr10	115469329	115120185	+	ENSG00000107518	ATRNL1	down	down_turquoise	down	hsa.miR.107	up	-0.399377	0.00023242	ENSG00000188352	FOCAD			-0.289862	0.00656215	0.155129	0.0950142	2.03941e-05	0	0	1	0
circ206	circATRNL1_6	chr10	115268444	115120185	+	ENSG00000107518	ATRNL1	down		down	hsa.miR.363.3p	up	-0.317642	0.00308697	ENSG00000134046	MBD2			-0.357213	0.00101845	0.198553	0.0460936	2.03942e-05	0	0	1	0
circ206	circATRNL1_6	chr10	115268444	115120185	+	ENSG00000107518	ATRNL1	down		down	hsa.let.7g.3p	up	-0.414378	0.000133887	ENSG00000137760	ALKBH8			-0.24676	0.01779	0.182405	0.0612267	2.0508e-05	0	0	0	1
circ5511	circARID1A	chr1	26732792	26729651	+	ENSG00000117713	ARID1A	up		up	hsa.miR.204.3p	down	-0.37186	0.000599038	ENSG00000107798	LIPA			-0.341756	0.00161735	0.122646	0.150636	2.0522e-05	0	0	0	1
circ206	circATRNL1_6	chr10	115268444	115120185	+	ENSG00000107518	ATRNL1	down		down	hsa.let.7g.3p	up	-0.414378	0.000133887	ENSG00000164100	NDST3			-0.248766	0.0170369	0.179459	0.0643568	2.06277e-05	0	0	0	1
circ3518	circEIF4G3_1	chr1	20893517	20942330	-	ENSG00000075151	EIF4G3	down		down	hsa.miR.10a.5p	up	-0.230139	0.0250709	ENSG00000203943	SAMD13			-0.451623	3.62738e-05	0.11723	0.16164	2.06523e-05	0	0	0	1
circ9676	circPHKB_2	chr16	47596531	47497399	+	ENSG00000102893	PHKB		down_turquoise	down	hsa.miR.708.5p	up	-0.215193	0.0337479	ENSG00000139155	SLCO1C1			-0.465321	2.0629e-05	0.0951499	0.211216	2.06582e-05	1	0	0	0
circ5511	circARID1A	chr1	26732792	26729651	+	ENSG00000117713	ARID1A	up		up	hsa.miR.204.3p	down	-0.37186	0.000599038	ENSG00000111790	FGFR1OP2			-0.351259	0.00122021	0.0992378	0.201769	2.07125e-05	0	0	0	1
circ16286	circZNF638_2	chr2	71427414	71426460	+	ENSG00000075292	ZNF638	down		down	hsa.miR.766.3p	up	-0.311524	0.00365004	ENSG00000100439	ABHD4			-0.429995	8.46142e-05	0.00590318	0.480234	2.08156e-05	0	0	0	1
circ206	circATRNL1_6	chr10	115268444	115120185	+	ENSG00000107518	ATRNL1	down		down	hsa.miR.363.3p	up	-0.317642	0.00308697	ENSG00000080546	SESN1			-0.377237	0.0005413	0.158946	0.089612	2.09912e-05	0	0	1	0
circ3279	circFAT3	chr11	92355404	92352096	+	ENSG00000165323	FAT3	down	down_turquoise	down	hsa.miR.708.5p	up	-0.276348	0.00911154	ENSG00000139644	TMBIM6			-0.446594	4.43799e-05	0.0390333	0.371505	2.10512e-05	0	0	1	0
circ27587	circDDX3Y	chrY	12913062	12909360	+	ENSG00000067048	DDX3Y	down		down	hsa.miR.148a.3p	up	-0.340794	0.00158703	ENSG00000076554	TPD52			-0.217514	0.0322606	0.319307	0.00294764	2.11363e-05	0	0	1	0
circ206	circATRNL1_6	chr10	115268444	115120185	+	ENSG00000107518	ATRNL1	down		down	hsa.let.7g.3p	up	-0.414378	0.000133887	ENSG00000005801	ZNF195			-0.197797	0.0467296	0.231848	0.0242077	2.12029e-05	0	0	0	1
circ219	circATRNL1_10	chr10	115315736	115215697	+	ENSG00000107518	ATRNL1		down_turquoise	down	hsa.miR.708.5p	up	-0.199181	0.0455711	ENSG00000158710	TAGLN2			-0.227601	0.0264948	0.415992	0.000125976	2.12827e-05	0	0	1	0
circ246	circATRNL1_11	chr10	115469329	115120185	+	ENSG00000107518	ATRNL1	down	down_turquoise	down	hsa.miR.148a.3p	up	-0.358576	0.000919439	ENSG00000162929	KIAA1841	1		-0.32027	0.00286961	0.185673	0.0578915	2.13616e-05	0	1	0	0
circ206	circATRNL1_6	chr10	115268444	115120185	+	ENSG00000107518	ATRNL1	down		down	hsa.let.7g.3p	up	-0.414378	0.000133887	ENSG00000131779	PEX11B	1		-0.256633	0.0143361	0.166225	0.0799344	2.14459e-05	0	1	0	0
circ217	circATRNL1_9	chr10	115315736	115120185	+	ENSG00000107518	ATRNL1	down	down_turquoise	down	hsa.miR.130b.5p	up	-0.298159	0.00520265	ENSG00000123700	KCNJ2			-0.355054	0.00108786	0.225667	0.02745	2.16836e-05	1	0	0	0
circ246	circATRNL1_11	chr10	115469329	115120185	+	ENSG00000107518	ATRNL1	down	down_turquoise	down	hsa.miR.130b.5p	up	-0.286115	0.00706556	ENSG00000185658	BRWD1			-0.419073	0.000127245	0.111364	0.174124	2.18295e-05	0	0	1	0
circ17709	circSLC4A7_1	chr3	27379249	27424152	-	ENSG00000033867	SLC4A7	down		down	hsa.miR.708.5p	up	-0.197115	0.0473089	ENSG00000158710	TAGLN2			-0.227601	0.0264948	0.416119	0.00012537	2.19026e-05	0	0	1	0
circ17709	circSLC4A7_1	chr3	27379249	27424152	-	ENSG00000033867	SLC4A7	down		down	hsa.miR.629.5p	up	-0.197751	0.0467681	ENSG00000167565	SERTAD3			-0.26157	0.012834	0.395984	0.000262367	2.19437e-05	0	0	1	0
circ27587	circDDX3Y	chrY	12913062	12909360	+	ENSG00000067048	DDX3Y	down		down	hsa.miR.148a.3p	up	-0.340794	0.00158703	ENSG00000135776	ABCB10			-0.257777	0.0138401	0.285513	0.0071722	2.19507e-05	0	0	1	0
circ5511	circARID1A	chr1	26732792	26729651	+	ENSG00000117713	ARID1A	up		up	hsa.miR.204.3p	down	-0.37186	0.000599038	ENSG00000143951	WDPCP			-0.370696	0.000668218	0.0318088	0.394676	2.20057e-05	0	0	0	1
circ206	circATRNL1_6	chr10	115268444	115120185	+	ENSG00000107518	ATRNL1	down		down	hsa.miR.148a.3p	up	-0.332569	0.00202179	ENSG00000182890	GLUD2			-0.301341	0.0047884	0.250273	0.0163586	2.2053e-05	0	0	1	0
circ15905	circNRXN1_3	chr2	50472298	50620183	-	ENSG00000179915	NRXN1	down		down	hsa.miR.629.5p	up	-0.30334	0.0045432	ENSG00000159658	EFCAB14			-0.312045	0.00370794	0.274119	0.00946791	2.21909e-05	0	0	1	0
circ206	circATRNL1_6	chr10	115268444	115120185	+	ENSG00000107518	ATRNL1	down		down	hsa.miR.363.3p	up	-0.317642	0.00308697	ENSG00000128607	KLHDC10			-0.398402	0.00026606	0.101802	0.195719	2.23442e-05	0	0	1	0
circ7234	circNEMF_1	chr14	49795791	49831361	-	ENSG00000165525	NEMF		down_turquoise	down	hsa.miR.450b.5p	up	-0.228948	0.0256873	ENSG00000070214	SLC44A1			-0.436474	6.60154e-05	0.15523	0.0948682	2.23596e-05	0	0	1	0
circ246	circATRNL1_11	chr10	115469329	115120185	+	ENSG00000107518	ATRNL1	down	down_turquoise	down	hsa.miR.107	up	-0.399377	0.00023242	ENSG00000113327	GABRG2			-0.247378	0.0175553	0.206854	0.0395526	2.24219e-05	0	0	0	1
circ500	circSUV39H2	chr10	14897517	14896846	+	ENSG00000152457	DCLRE1C		down_turquoise	down	hsa.miR.450b.5p	up	-0.233641	0.0233285	ENSG00000165675	ENOX2			-0.470165	1.68065e-05	0.0264647	0.412059	2.2443e-05	0	0	1	0
circ217	circATRNL1_9	chr10	115315736	115120185	+	ENSG00000107518	ATRNL1	down	down_turquoise	down	hsa.miR.130b.5p	up	-0.298159	0.00520265	ENSG00000185129	PURA			-0.351938	0.00119552	0.228193	0.0260846	2.25271e-05	0	0	1	0
circ21473	circATG5	chr6	106248150	106308491	-	ENSG00000057663	ATG5	down	down_turquoise	down	hsa.miR.450b.5p	up	-0.202514	0.0428739	ENSG00000136237	RAPGEF5			-0.469055	1.76195e-05	0.0935568	0.215559	2.25996e-05	0	0	1	0
circ206	circATRNL1_6	chr10	115268444	115120185	+	ENSG00000107518	ATRNL1	down		down	hsa.miR.363.3p	up	-0.317642	0.00308697	ENSG00000178567	EPM2AIP1			-0.366778	0.000756608	0.174642	0.0697344	2.26042e-05	0	0	1	0
circ206	circATRNL1_6	chr10	115268444	115120185	+	ENSG00000107518	ATRNL1	down		down	hsa.miR.363.3p	up	-0.317642	0.00308697	ENSG00000113441	LNPEP			-0.392817	0.000322288	0.115145	0.166011	2.28836e-05	0	0	1	0
circ27587	circDDX3Y	chrY	12913062	12909360	+	ENSG00000067048	DDX3Y	down		down	hsa.chr5.14497.s	up	-0.242594	0.0193225	ENSG00000115464	USP34			-0.376191	0.000518888	0.249848	0.0165118	2.29309e-05	0	0	0	1
circ206	circATRNL1_6	chr10	115268444	115120185	+	ENSG00000107518	ATRNL1	down		down	hsa.miR.363.3p	up	-0.317642	0.00308697	ENSG00000087502	ERGIC2			-0.363476	0.00083915	0.179521	0.0642894	2.3051e-05	0	0	1	0
circ27587	circDDX3Y	chrY	12913062	12909360	+	ENSG00000067048	DDX3Y	down		down	hsa.miR.148a.3p	up	-0.340794	0.00158703	ENSG00000066382	MPPED2	1		-0.321951	0.00273773	0.208424	0.0384029	2.30897e-05	0	1	1	0
circ27587	circDDX3Y	chrY	12913062	12909360	+	ENSG00000067048	DDX3Y	down		down	hsa.chr5.14497.s	up	-0.242594	0.0193225	ENSG00000120802	TMPO			-0.336653	0.00179425	0.301116	0.0048167	2.31065e-05	0	0	0	1
circ206	circATRNL1_6	chr10	115268444	115120185	+	ENSG00000107518	ATRNL1	down		down	hsa.miR.363.3p	up	-0.317642	0.00308697	ENSG00000157500	APPL1			-0.357244	0.00101748	0.190448	0.0532733	2.31474e-05	0	0	1	0
circ246	circATRNL1_11	chr10	115469329	115120185	+	ENSG00000107518	ATRNL1	down	down_turquoise	down	hsa.miR.708.5p	up	-0.280353	0.00814435	ENSG00000168309	FAM107A		1	-0.427373	9.34339e-05	0.0912534	0.221298	2.32776e-05	0	0	1	0
circ206	circATRNL1_6	chr10	115268444	115120185	+	ENSG00000107518	ATRNL1	down		down	hsa.let.7g.3p	up	-0.414378	0.000133887	ENSG00000197323	TRIM33			-0.232661	0.0239115	0.190962	0.0527933	2.33525e-05	1	0	1	0
circ219	circATRNL1_10	chr10	115315736	115215697	+	ENSG00000107518	ATRNL1		down_turquoise	down	hsa.miR.708.5p	up	-0.199181	0.0455711	ENSG00000139644	TMBIM6			-0.446594	4.43799e-05	0.162851	0.084319	2.35366e-05	0	0	1	0
circ206	circATRNL1_6	chr10	115268444	115120185	+	ENSG00000107518	ATRNL1	down		down	hsa.let.7g.3p	up	-0.414378	0.000133887	ENSG00000157500	APPL1			-0.231797	0.0243372	0.190448	0.0532733	2.39075e-05	0	0	0	1
circ217	circATRNL1_9	chr10	115315736	115120185	+	ENSG00000107518	ATRNL1	down	down_turquoise	down	hsa.miR.130b.5p	up	-0.298159	0.00520265	ENSG00000065600	TMEM206			-0.403523	0.000222539	0.122751	0.150427	2.39772e-05	0	0	1	0
circ7886	circVRK1	chr14	96860735	96833467	+	ENSG00000100749	VRK1		down_turquoise	down	hsa.miR.450b.5p	up	-0.273195	0.00967881	ENSG00000137656	BUD13			-0.353172	0.00115179	0.252285	0.0156482	2.40114e-05	0	0	1	0
circ206	circATRNL1_6	chr10	115268444	115120185	+	ENSG00000107518	ATRNL1	down		down	hsa.miR.363.3p	up	-0.317642	0.00308697	ENSG00000205423	CNEP1R1			-0.377669	0.000533745	0.147707	0.106184	2.40731e-05	0	0	1	0
circ206	circATRNL1_6	chr10	115268444	115120185	+	ENSG00000107518	ATRNL1	down		down	hsa.let.7g.3p	up	-0.414378	0.000133887	ENSG00000119787	ATL2			-0.271072	0.0103168	0.135408	0.126679	2.40761e-05	0	0	0	1
circ5511	circARID1A	chr1	26732792	26729651	+	ENSG00000117713	ARID1A	up		up	hsa.miR.204.3p	down	-0.37186	0.000599038	ENSG00000145087	STXBP5L	1		-0.360391	0.00092356	0.0566937	0.31689	2.41171e-05	0	0	0	1
circ27587	circDDX3Y	chrY	12913062	12909360	+	ENSG00000067048	DDX3Y	down		down	hsa.miR.148a.3p	up	-0.340794	0.00158703	ENSG00000015153	YAF2			-0.208381	0.0384338	0.320202	0.00287507	2.41229e-05	0	0	1	0
circ17709	circSLC4A7_1	chr3	27379249	27424152	-	ENSG00000033867	SLC4A7	down		down	hsa.miR.708.5p	up	-0.197115	0.0473089	ENSG00000139644	TMBIM6			-0.446594	4.43799e-05	0.16324	0.0838041	2.41937e-05	0	0	1	0
circ206	circATRNL1_6	chr10	115268444	115120185	+	ENSG00000107518	ATRNL1	down		down	hsa.miR.363.3p	up	-0.317642	0.00308697	ENSG00000040731	CDH10			-0.353573	0.00113789	0.192786	0.0511186	2.46296e-05	1	0	0	0
circ27587	circDDX3Y	chrY	12913062	12909360	+	ENSG00000067048	DDX3Y	down		down	hsa.miR.148a.3p	up	-0.340794	0.00158703	ENSG00000110768	GTF2H1			-0.277153	0.0088024	0.260929	0.0128845	2.46818e-05	0	0	1	0
circ206	circATRNL1_6	chr10	115268444	115120185	+	ENSG00000107518	ATRNL1	down		down	hsa.let.7g.3p	up	-0.414378	0.000133887	ENSG00000102081	FMR1			-0.242194	0.0196093	0.175422	0.068842	2.47719e-05	1	0	0	0
circ206	circATRNL1_6	chr10	115268444	115120185	+	ENSG00000107518	ATRNL1	down		down	hsa.miR.363.3p	up	-0.317642	0.00308697	ENSG00000095002	MSH2			-0.381741	0.000467084	0.135907	0.125798	2.48497e-05	0	0	1	0
circ206	circATRNL1_6	chr10	115268444	115120185	+	ENSG00000107518	ATRNL1	down		down	hsa.let.7g.3p	up	-0.414378	0.000133887	ENSG00000146007	ZMAT2			-0.218283	0.0318505	0.202887	0.0425802	2.48728e-05	0	0	1	0
circ2066	circMAN1A2_4	chr1	117502970	117460489	+	ENSG00000198162	MAN1A2	down	down_turquoise	down	hsa.miR.3938	up	-0.201718	0.0435064	ENSG00000155792	DEPTOR			-0.460632	2.50887e-05	0.114446	0.167492	2.50224e-05	0	0	0	1
circ5511	circARID1A	chr1	26732792	26729651	+	ENSG00000117713	ARID1A	up		up	hsa.miR.204.3p	down	-0.37186	0.000599038	ENSG00000205659	LIN52			-0.348359	0.00133094	0.0875496	0.230704	2.51566e-05	0	0	0	1
circ246	circATRNL1_11	chr10	115469329	115120185	+	ENSG00000107518	ATRNL1	down	down_turquoise	down	hsa.miR.130b.5p	up	-0.286115	0.00706556	ENSG00000138386	NAB1			-0.423362	0.000108576	0.0837968	0.240454	2.522e-05	0	0	1	0
circ206	circATRNL1_6	chr10	115268444	115120185	+	ENSG00000107518	ATRNL1	down		down	hsa.miR.363.3p	up	-0.317642	0.00308697	ENSG00000004897	CDC27			-0.348235	0.00133584	0.20019	0.0447407	2.52241e-05	0	0	1	0
circ206	circATRNL1_6	chr10	115268444	115120185	+	ENSG00000107518	ATRNL1	down		down	hsa.miR.363.3p	up	-0.317642	0.00308697	ENSG00000177565	TBL1XR1			-0.352771	0.00116584	0.192615	0.0512742	2.52282e-05	1	0	1	0
circ246	circATRNL1_11	chr10	115469329	115120185	+	ENSG00000107518	ATRNL1	down	down_turquoise	down	hsa.miR.130b.5p	up	-0.286115	0.00706556	ENSG00000187231	SESTD1	1		-0.419598	0.000124813	0.0961225	0.209266	2.52299e-05	0	1	1	0
circ5511	circARID1A	chr1	26732792	26729651	+	ENSG00000117713	ARID1A	up		up	hsa.miR.204.3p	down	-0.37186	0.000599038	ENSG00000165525	NEMF			-0.339843	0.00171007	0.108464	0.18051	2.52741e-05	0	0	0	1
circ206	circATRNL1_6	chr10	115268444	115120185	+	ENSG00000107518	ATRNL1	down		down	hsa.let.7g.3p	up	-0.414378	0.000133887	ENSG00000173726	TOMM20	1		-0.20187	0.0434014	0.2181	0.0318933	2.5324e-05	1	1	0	0
circ15905	circNRXN1_3	chr2	50472298	50620183	-	ENSG00000179915	NRXN1	down		down	hsa.miR.629.5p	up	-0.30334	0.0045432	ENSG00000148730	EIF4EBP2			-0.365297	0.000792682	0.192373	0.0514944	2.53383e-05	1	0	1	0
circ246	circATRNL1_11	chr10	115469329	115120185	+	ENSG00000107518	ATRNL1	down	down_turquoise	down	hsa.miR.107	up	-0.399377	0.00023242	ENSG00000184305	CCSER1			-0.252931	0.0155582	0.192384	0.0514842	2.54248e-05	0	0	1	0
circ206	circATRNL1_6	chr10	115268444	115120185	+	ENSG00000107518	ATRNL1	down		down	hsa.miR.363.3p	up	-0.317642	0.00308697	ENSG00000267680	ZNF224			-0.346909	0.00138961	0.201749	0.0434815	2.54674e-05	0	0	1	0
circ27587	circDDX3Y	chrY	12913062	12909360	+	ENSG00000067048	DDX3Y	down		down	hsa.miR.148a.3p	up	-0.340794	0.00158703	ENSG00000112996	MRPS30			-0.205095	0.0408728	0.320071	0.00288553	2.55455e-05	0	0	1	0
circ206	circATRNL1_6	chr10	115268444	115120185	+	ENSG00000107518	ATRNL1	down		down	hsa.miR.363.3p	up	-0.317642	0.00308697	ENSG00000152749	GPR180			-0.384765	0.000422597	0.12615	0.143783	2.55933e-05	0	0	1	0
circ246	circATRNL1_11	chr10	115469329	115120185	+	ENSG00000107518	ATRNL1	down	down_turquoise	down	hsa.miR.148a.3p	up	-0.358576	0.000919439	ENSG00000134247	PTGFRN			-0.306864	0.00413757	0.194652	0.0494484	2.56583e-05	0	0	1	0
circ206	circATRNL1_6	chr10	115268444	115120185	+	ENSG00000107518	ATRNL1	down		down	hsa.miR.363.3p	up	-0.317642	0.00308697	ENSG00000149212	SESN3			-0.336233	0.00189806	0.217742	0.0321174	2.56668e-05	0	0	1	0
circ246	circATRNL1_11	chr10	115469329	115120185	+	ENSG00000107518	ATRNL1	down	down_turquoise	down	hsa.miR.107	up	-0.399377	0.00023242	ENSG00000178694	NSUN3			-0.201438	0.0437452	0.244433	0.0185747	2.5747e-05	0	0	1	0
circ206	circATRNL1_6	chr10	115268444	115120185	+	ENSG00000107518	ATRNL1	down		down	hsa.let.7g.3p	up	-0.414378	0.000133887	ENSG00000132964	CDK8			-0.256078	0.0145141	0.153412	0.0975195	2.5825e-05	0	0	0	1
circ27587	circDDX3Y	chrY	12913062	12909360	+	ENSG00000067048	DDX3Y	down		down	hsa.miR.148a.3p	up	-0.340794	0.00158703	ENSG00000153130	SCOC			-0.287859	0.00676457	0.246399	0.0178023	2.60181e-05	0	0	1	0
circ246	circATRNL1_11	chr10	115469329	115120185	+	ENSG00000107518	ATRNL1	down	down_turquoise	down	hsa.miR.708.5p	up	-0.280353	0.00814435	ENSG00000124942	AHNAK			-0.318215	0.0031406	0.283797	0.00748364	2.6054e-05	0	0	1	0
circ246	circATRNL1_11	chr10	115469329	115120185	+	ENSG00000107518	ATRNL1	down	down_turquoise	down	hsa.miR.107	up	-0.399377	0.00023242	ENSG00000175395	ZNF25	1		-0.243428	0.0191029	0.201902	0.0433592	2.61847e-05	0	1	1	0
circ206	circATRNL1_6	chr10	115268444	115120185	+	ENSG00000107518	ATRNL1	down		down	hsa.let.7g.3p	up	-0.414378	0.000133887	ENSG00000165169	DYNLT3			-0.235191	0.0227001	0.180394	0.0633502	2.61879e-05	0	0	0	1
circ5511	circARID1A	chr1	26732792	26729651	+	ENSG00000117713	ARID1A	up		up	hsa.miR.204.3p	down	-0.37186	0.000599038	ENSG00000147655	RSPO2			-0.298994	0.00521326	0.181896	0.0617586	2.62275e-05	0	0	0	1
circ206	circATRNL1_6	chr10	115268444	115120185	+	ENSG00000107518	ATRNL1	down		down	hsa.miR.363.3p	up	-0.317642	0.00308697	ENSG00000110066	KMT5B			-0.372331	0.000634183	0.152492	0.0988808	2.63125e-05	1	0	1	0
circ217	circATRNL1_9	chr10	115315736	115120185	+	ENSG00000107518	ATRNL1	down	down_turquoise	down	hsa.miR.708.5p	up	-0.296191	0.00547408	ENSG00000135318	NT5E			-0.432309	7.74775e-05	0.0126853	0.457586	2.63711e-05	0	0	1	0
circ15905	circNRXN1_3	chr2	50472298	50620183	-	ENSG00000179915	NRXN1	down		down	hsa.miR.708.5p	up	-0.216171	0.0331142	ENSG00000139644	TMBIM6			-0.446594	4.43799e-05	0.132349	0.13217	2.6391e-05	0	0	1	0
circ206	circATRNL1_6	chr10	115268444	115120185	+	ENSG00000107518	ATRNL1	down		down	hsa.miR.363.3p	up	-0.317642	0.00308697	ENSG00000008018	PSMB1			-0.324633	0.0026334	0.232425	0.0239219	2.64184e-05	0	0	1	0
circ5511	circARID1A	chr1	26732792	26729651	+	ENSG00000117713	ARID1A	up		up	hsa.miR.204.3p	down	-0.37186	0.000599038	ENSG00000157500	APPL1			-0.334783	0.00197863	0.115976	0.16426	2.64455e-05	0	0	0	1
circ27587	circDDX3Y	chrY	12913062	12909360	+	ENSG00000067048	DDX3Y	down		down	hsa.miR.148a.3p	up	-0.340794	0.00158703	ENSG00000164933	SLC25A32			-0.2465	0.0177633	0.286929	0.00692373	2.65043e-05	0	0	1	0
circ7886	circVRK1	chr14	96860735	96833467	+	ENSG00000100749	VRK1		down_turquoise	down	hsa.miR.450b.5p	up	-0.273195	0.00967881	ENSG00000070214	SLC44A1			-0.436474	6.60154e-05	0.0601788	0.306515	2.65833e-05	0	0	1	0
circ206	circATRNL1_6	chr10	115268444	115120185	+	ENSG00000107518	ATRNL1	down		down	hsa.let.7g.3p	up	-0.414378	0.000133887	ENSG00000165678	GHITM			-0.245711	0.0181949	0.165508	0.0808518	2.67159e-05	0	0	0	1
circ206	circATRNL1_6	chr10	115268444	115120185	+	ENSG00000107518	ATRNL1	down		down	hsa.let.7g.3p	up	-0.414378	0.000133887	ENSG00000119965	C10orf88			-0.256572	0.0143558	0.149983	0.102665	2.67597e-05	0	0	0	1
circ8229	circMGA_1	chr15	41669958	41668828	+	ENSG00000174197	MGA		down_turquoise	down	hsa.miR.450b.5p	up	-0.221453	0.0298575	ENSG00000136237	RAPGEF5			-0.469055	1.76195e-05	0.0378727	0.375199	2.67662e-05	0	0	1	0
circ15905	circNRXN1_3	chr2	50472298	50620183	-	ENSG00000179915	NRXN1	down		down	hsa.miR.629.5p	up	-0.30334	0.0045432	ENSG00000129353	SLC44A2			-0.37193	0.000642382	0.176104	0.0680676	2.69176e-05	0	0	1	0
circ246	circATRNL1_11	chr10	115469329	115120185	+	ENSG00000107518	ATRNL1	down	down_turquoise	down	hsa.miR.148a.3p	up	-0.358576	0.000919439	ENSG00000157404	KIT			-0.297747	0.00525847	0.204525	0.0413087	2.70447e-05	1	0	1	0
circ15905	circNRXN1_3	chr2	50472298	50620183	-	ENSG00000179915	NRXN1	down		down	hsa.miR.629.5p	up	-0.30334	0.0045432	ENSG00000187837	HIST1H1C			-0.353326	0.00114642	0.208424	0.0384025	2.70799e-05	0	0	1	0
circ206	circATRNL1_6	chr10	115268444	115120185	+	ENSG00000107518	ATRNL1	down		down	hsa.miR.363.3p	up	-0.317642	0.00308697	ENSG00000136156	ITM2B			-0.360083	0.000932409	0.174814	0.0695373	2.70958e-05	0	0	1	0
circ3279	circFAT3	chr11	92355404	92352096	+	ENSG00000165323	FAT3	down	down_turquoise	down	hsa.miR.708.5p	up	-0.276348	0.00911154	ENSG00000135318	NT5E			-0.432309	7.74775e-05	0.0680451	0.283659	2.71071e-05	0	0	1	0
circ206	circATRNL1_6	chr10	115268444	115120185	+	ENSG00000107518	ATRNL1	down		down	hsa.miR.363.3p	up	-0.317642	0.00308697	ENSG00000154305	MIA3			-0.391799	0.00033364	0.102176	0.194845	2.71586e-05	0	0	1	0
circ206	circATRNL1_6	chr10	115268444	115120185	+	ENSG00000107518	ATRNL1	down		down	hsa.miR.363.3p	up	-0.317642	0.00308697	ENSG00000113448	PDE4D			-0.376373	0.000556701	0.140677	0.117591	2.73256e-05	0	0	1	0
circ217	circATRNL1_9	chr10	115315736	115120185	+	ENSG00000107518	ATRNL1	down	down_turquoise	down	hsa.miR.130b.5p	up	-0.298159	0.00520265	ENSG00000151835	SACS			-0.344687	0.00148401	0.228015	0.026179	2.73303e-05	0	0	1	0
circ206	circATRNL1_6	chr10	115268444	115120185	+	ENSG00000107518	ATRNL1	down		down	hsa.miR.363.3p	up	-0.317642	0.00308697	ENSG00000174748	RPL15			-0.34478	0.00147997	0.20072	0.0443094	2.73671e-05	0	0	0	1
circ27587	circDDX3Y	chrY	12913062	12909360	+	ENSG00000067048	DDX3Y	down		down	hsa.miR.148a.3p	up	-0.340794	0.00158703	ENSG00000185658	BRWD1			-0.240067	0.0203902	0.290947	0.00625841	2.73777e-05	0	0	1	0
circ206	circATRNL1_6	chr10	115268444	115120185	+	ENSG00000107518	ATRNL1	down		down	hsa.let.7g.3p	up	-0.414378	0.000133887	ENSG00000107864	CPEB3			-0.286406	0.00714656	0.0950057	0.211992	2.74155e-05	0	0	1	0
circ7886	circVRK1	chr14	96860735	96833467	+	ENSG00000100749	VRK1		down_turquoise	down	hsa.miR.450b.5p	up	-0.273195	0.00967881	ENSG00000174628	IQCK			-0.389979	0.00035485	0.184208	0.0593691	2.75419e-05	0	0	1	0
circ246	circATRNL1_11	chr10	115469329	115120185	+	ENSG00000107518	ATRNL1	down	down_turquoise	down	hsa.miR.107	up	-0.399377	0.00023242	ENSG00000149084	HSD17B12			-0.303499	0.00464223	0.103466	0.191852	2.79085e-05	0	0	1	0
circ18608	circCYP2U1	chr4	107947537	107944970	+	ENSG00000155016	CYP2U1	down		down	hsa.miR.107	up	-0.215265	0.0337009	ENSG00000197763	TXNRD3			-0.375663	0.000569649	0.268609	0.010787	2.7919e-05	0	0	1	0
circ7234	circNEMF_1	chr14	49795791	49831361	-	ENSG00000165525	NEMF		down_turquoise	down	hsa.miR.450b.5p	up	-0.228948	0.0256873	ENSG00000120800	UTP20			-0.378965	0.000511652	0.251675	0.0158608	2.80815e-05	0	0	1	0
circ246	circATRNL1_11	chr10	115469329	115120185	+	ENSG00000107518	ATRNL1	down	down_turquoise	down	hsa.miR.107	up	-0.399377	0.00023242	ENSG00000132356	PRKAA1			-0.229915	0.0252862	0.212562	0.0355001	2.81023e-05	0	0	1	0
circ7886	circVRK1	chr14	96860735	96833467	+	ENSG00000100749	VRK1		down_turquoise	down	hsa.miR.450b.5p	up	-0.273195	0.00967881	ENSG00000164176	EDIL3			-0.419999	0.000122982	0.110654	0.175674	2.81583e-05	0	0	1	0
circ27587	circDDX3Y	chrY	12913062	12909360	+	ENSG00000067048	DDX3Y	down		down	hsa.miR.148a.3p	up	-0.340794	0.00158703	ENSG00000011566	MAP4K3			-0.22083	0.0302275	0.304826	0.00436811	2.82102e-05	0	0	1	0
circ500	circSUV39H2	chr10	14897517	14896846	+	ENSG00000152457	DCLRE1C		down_turquoise	down	hsa.miR.450b.5p	up	-0.233641	0.0233285	ENSG00000117594	HSD11B1			-0.457948	2.80296e-05	0.0551041	0.321669	2.83034e-05	1	0	1	0
circ27587	circDDX3Y	chrY	12913062	12909360	+	ENSG00000067048	DDX3Y	down		down	hsa.miR.148a.3p	up	-0.340794	0.00158703	ENSG00000107105	ELAVL2			-0.265151	0.0116923	0.266395	0.0113593	2.83564e-05	1	0	1	0
circ206	circATRNL1_6	chr10	115268444	115120185	+	ENSG00000107518	ATRNL1	down		down	hsa.miR.363.3p	up	-0.317642	0.00308697	ENSG00000086300	SNX10			-0.372331	0.000634183	0.146631	0.107877	2.84044e-05	0	0	1	0
circ206	circATRNL1_6	chr10	115268444	115120185	+	ENSG00000107518	ATRNL1	down		down	hsa.let.7g.3p	up	-0.414378	0.000133887	ENSG00000163412	EIF4E3			-0.255152	0.0148148	0.147489	0.106526	2.84168e-05	0	0	0	1
circ206	circATRNL1_6	chr10	115268444	115120185	+	ENSG00000107518	ATRNL1	down		down	hsa.miR.363.3p	up	-0.317642	0.00308697	ENSG00000163376	KBTBD8			-0.372054	0.000639849	0.14713	0.107089	2.84436e-05	0	0	1	0
circ15905	circNRXN1_3	chr2	50472298	50620183	-	ENSG00000179915	NRXN1	down		down	hsa.miR.629.5p	up	-0.30334	0.0045432	ENSG00000127241	MASP1			-0.39689	0.000280321	0.115058	0.166195	2.84596e-05	0	0	1	0
circ206	circATRNL1_6	chr10	115268444	115120185	+	ENSG00000107518	ATRNL1	down		down	hsa.miR.363.3p	up	-0.317642	0.00308697	ENSG00000164329	PAPD4			-0.359342	0.00095396	0.172678	0.0720218	2.85111e-05	0	0	1	0
circ206	circATRNL1_6	chr10	115268444	115120185	+	ENSG00000107518	ATRNL1	down		down	hsa.let.7g.3p	up	-0.414378	0.000133887	ENSG00000143033	MTF2			-0.255924	0.0145638	0.145759	0.109264	2.86246e-05	0	0	1	0
circ5511	circARID1A	chr1	26732792	26729651	+	ENSG00000117713	ARID1A	up		up	hsa.miR.204.3p	down	-0.37186	0.000599038	ENSG00000049167	ERCC8			-0.326638	0.00249056	0.126632	0.142857	2.86338e-05	0	0	0	1
circ16286	circZNF638_2	chr2	71427414	71426460	+	ENSG00000075292	ZNF638	down		down	hsa.miR.766.3p	up	-0.311524	0.00365004	ENSG00000178150	ZNF114			-0.403122	0.000225696	0.0766177	0.2597	2.8729e-05	0	0	1	0
circ206	circATRNL1_6	chr10	115268444	115120185	+	ENSG00000107518	ATRNL1	down		down	hsa.let.7g.3p	up	-0.414378	0.000133887	ENSG00000102543	CDADC1			-0.258731	0.0136805	0.141051	0.116964	2.87637e-05	0	0	0	1
circ246	circATRNL1_11	chr10	115469329	115120185	+	ENSG00000107518	ATRNL1	down	down_turquoise	down	hsa.miR.708.5p	up	-0.280353	0.00814435	ENSG00000011201	ANOS1			-0.339041	0.00175034	0.253306	0.0152979	2.92163e-05	0	0	1	0
circ246	circATRNL1_11	chr10	115469329	115120185	+	ENSG00000107518	ATRNL1	down	down_turquoise	down	hsa.miR.107	up	-0.399377	0.00023242	ENSG00000117620	SLC35A3			-0.251388	0.0160927	0.18501	0.0585568	2.93268e-05	1	0	1	0
circ7234	circNEMF_1	chr14	49795791	49831361	-	ENSG00000165525	NEMF		down_turquoise	down	hsa.miR.450b.5p	up	-0.228948	0.0256873	ENSG00000065809	FAM107B			-0.427095	9.44158e-05	0.158376	0.0904032	2.93546e-05	0	0	1	0
circ217	circATRNL1_9	chr10	115315736	115120185	+	ENSG00000107518	ATRNL1	down	down_turquoise	down	hsa.miR.130b.5p	up	-0.298159	0.00520265	ENSG00000079459	FDFT1			-0.347063	0.00138326	0.220227	0.0305895	2.94589e-05	0	0	1	0
circ206	circATRNL1_6	chr10	115268444	115120185	+	ENSG00000107518	ATRNL1	down		down	hsa.let.7g.3p	up	-0.414378	0.000133887	ENSG00000151729	SLC25A4			-0.241053	0.0200877	0.164604	0.0820196	2.95116e-05	0	0	0	1
circ206	circATRNL1_6	chr10	115268444	115120185	+	ENSG00000107518	ATRNL1	down		down	hsa.miR.363.3p	up	-0.317642	0.00308697	ENSG00000198382	UVRAG	1		-0.37517	0.000578817	0.13717	0.123589	2.95395e-05	0	1	1	0
circ206	circATRNL1_6	chr10	115268444	115120185	+	ENSG00000107518	ATRNL1	down		down	hsa.let.7g.3p	up	-0.414378	0.000133887	ENSG00000135750	KCNK1			-0.300568	0.00500717	0.0523428	0.330041	2.959e-05	0	0	0	1
circ246	circATRNL1_11	chr10	115469329	115120185	+	ENSG00000107518	ATRNL1	down	down_turquoise	down	hsa.miR.107	up	-0.399377	0.00023242	ENSG00000075239	ACAT1			-0.245187	0.0184002	0.191844	0.0519784	2.97111e-05	0	0	1	0
circ217	circATRNL1_9	chr10	115315736	115120185	+	ENSG00000107518	ATRNL1	down	down_turquoise	down	hsa.miR.130b.5p	up	-0.298159	0.00520265	ENSG00000108443	RPS6KB1			-0.365297	0.000792682	0.18964	0.0540337	2.97754e-05	0	0	1	0
circ3279	circFAT3	chr11	92355404	92352096	+	ENSG00000165323	FAT3	down	down_turquoise	down	hsa.miR.708.5p	up	-0.276348	0.00911154	ENSG00000124942	AHNAK			-0.318215	0.0031406	0.282171	0.00778967	2.97836e-05	0	0	1	0
circ217	circATRNL1_9	chr10	115315736	115120185	+	ENSG00000107518	ATRNL1	down	down_turquoise	down	hsa.miR.130b.5p	up	-0.298159	0.00520265	ENSG00000175161	CADM2			-0.370511	0.000672173	0.17999	0.0637837	2.98011e-05	1	0	0	0
circ16286	circZNF638_2	chr2	71427414	71426460	+	ENSG00000075292	ZNF638	down		down	hsa.miR.766.3p	up	-0.311524	0.00365004	ENSG00000117280	RAB29		1	-0.416728	0.000138662	0.0175086	0.441557	2.98509e-05	0	0	0	1
circ17709	circSLC4A7_1	chr3	27379249	27424152	-	ENSG00000033867	SLC4A7	down		down	hsa.miR.629.5p	up	-0.197751	0.0467681	ENSG00000164761	TNFRSF11B		1	-0.431538	7.97921e-05	0.183593	0.0599976	2.98994e-05	0	0	1	0
circ246	circATRNL1_11	chr10	115469329	115120185	+	ENSG00000107518	ATRNL1	down	down_turquoise	down	hsa.miR.107	up	-0.399377	0.00023242	ENSG00000148835	TAF5			-0.222202	0.0294999	0.216866	0.0326703	2.99117e-05	0	0	1	0
circ206	circATRNL1_6	chr10	115268444	115120185	+	ENSG00000107518	ATRNL1	down		down	hsa.miR.363.3p	up	-0.317642	0.00308697	ENSG00000073910	FRY			-0.375077	0.000580551	0.136172	0.125333	2.99837e-05	0	0	1	0
circ206	circATRNL1_6	chr10	115268444	115120185	+	ENSG00000107518	ATRNL1	down		down	hsa.let.7g.3p	up	-0.414378	0.000133887	ENSG00000147650	LRP12			-0.261385	0.0128878	0.133413	0.130242	2.99977e-05	0	0	0	1
circ8229	circMGA_1	chr15	41669958	41668828	+	ENSG00000174197	MGA		down_turquoise	down	hsa.miR.450b.5p	up	-0.221453	0.0298575	ENSG00000126803	HSPA2			-0.448291	4.14736e-05	0.107013	0.18376	3.03274e-05	0	0	1	0
circ206	circATRNL1_6	chr10	115268444	115120185	+	ENSG00000107518	ATRNL1	down		down	hsa.let.7g.3p	up	-0.414378	0.000133887	ENSG00000162694	EXTL2	1		-0.27425	0.00957547	0.108832	0.179693	3.06573e-05	0	0	1	0
circ246	circATRNL1_11	chr10	115469329	115120185	+	ENSG00000107518	ATRNL1	down	down_turquoise	down	hsa.miR.363.3p	up	-0.222003	0.0295342	ENSG00000065883	CDK13			-0.445977	4.54827e-05	0.112351	0.171982	3.07333e-05	1	0	1	0
circ206	circATRNL1_6	chr10	115268444	115120185	+	ENSG00000107518	ATRNL1	down		down	hsa.miR.363.3p	up	-0.317642	0.00308697	ENSG00000197601	FAR1			-0.35311	0.00115394	0.178913	0.0649496	3.07729e-05	0	0	1	0
circ15905	circNRXN1_3	chr2	50472298	50620183	-	ENSG00000179915	NRXN1	down		down	hsa.miR.629.5p	up	-0.30334	0.0045432	ENSG00000157184	CPT2			-0.393157	0.000318583	0.117971	0.160106	3.08164e-05	0	0	1	0
circ3279	circFAT3	chr11	92355404	92352096	+	ENSG00000165323	FAT3	down	down_turquoise	down	hsa.miR.708.5p	up	-0.276348	0.00911154	ENSG00000171766	GATM			-0.417808	0.000133292	0.103309	0.192214	3.10157e-05	1	0	1	0
circ206	circATRNL1_6	chr10	115268444	115120185	+	ENSG00000107518	ATRNL1	down		down	hsa.miR.363.3p	up	-0.317642	0.00308697	ENSG00000115137	DNAJC27			-0.395347	0.000295591	0.0772516	0.25797	3.12428e-05	0	0	1	0
circ246	circATRNL1_11	chr10	115469329	115120185	+	ENSG00000107518	ATRNL1	down	down_turquoise	down	hsa.miR.107	up	-0.399377	0.00023242	ENSG00000103047	TANGO6			-0.265704	0.011681	0.160837	0.0870195	3.13427e-05	0	0	1	0
circ7886	circVRK1	chr14	96860735	96833467	+	ENSG00000100749	VRK1		down_turquoise	down	hsa.miR.450b.5p	up	-0.273195	0.00967881	ENSG00000153002	CPB1			-0.340244	0.00169024	0.25537	0.0146095	3.1663e-05	0	0	1	0
circ206	circATRNL1_6	chr10	115268444	115120185	+	ENSG00000107518	ATRNL1	down		down	hsa.miR.363.3p	up	-0.317642	0.00308697	ENSG00000181751	C5orf30			-0.363754	0.000831906	0.156171	0.0935165	3.1797e-05	0	0	1	0
circ217	circATRNL1_9	chr10	115315736	115120185	+	ENSG00000107518	ATRNL1	down	down_turquoise	down	hsa.miR.130b.5p	up	-0.298159	0.00520265	ENSG00000186660	ZFP91			-0.371591	0.000649395	0.173351	0.0712318	3.18556e-05	0	0	1	0
circ206	circATRNL1_6	chr10	115268444	115120185	+	ENSG00000107518	ATRNL1	down		down	hsa.let.7g.3p	up	-0.414378	0.000133887	ENSG00000140945	CDH13			-0.249907	0.0166203	0.146148	0.108643	3.19828e-05	0	0	1	0
circ246	circATRNL1_11	chr10	115469329	115120185	+	ENSG00000107518	ATRNL1	down	down_turquoise	down	hsa.miR.130b.5p	up	-0.286115	0.00706556	ENSG00000144228	SPOPL			-0.417685	0.000133896	0.0774256	0.257496	3.2197e-05	0	0	1	0
circ206	circATRNL1_6	chr10	115268444	115120185	+	ENSG00000107518	ATRNL1	down		down	hsa.let.7g.3p	up	-0.414378	0.000133887	ENSG00000018189	RUFY3			-0.221153	0.0301148	0.183091	0.060515	3.22424e-05	0	0	1	0
circ246	circATRNL1_11	chr10	115469329	115120185	+	ENSG00000107518	ATRNL1	down	down_turquoise	down	hsa.miR.107	up	-0.399377	0.00023242	ENSG00000091140	DLD			-0.216278	0.0331112	0.218316	0.031759	3.22902e-05	0	0	1	0
circ246	circATRNL1_11	chr10	115469329	115120185	+	ENSG00000107518	ATRNL1	down	down_turquoise	down	hsa.miR.130b.5p	up	-0.286115	0.00706556	ENSG00000115368	WDR75			-0.384518	0.000426078	0.16511	0.0813644	3.23525e-05	0	0	1	0
circ21473	circATG5	chr6	106248150	106308491	-	ENSG00000057663	ATG5	down	down_turquoise	down	hsa.miR.450b.5p	up	-0.202514	0.0428739	ENSG00000065413	ANKRD44			-0.44644	4.46532e-05	0.134489	0.128313	3.24341e-05	0	0	1	0
circ206	circATRNL1_6	chr10	115268444	115120185	+	ENSG00000107518	ATRNL1	down		down	hsa.let.7g.3p	up	-0.414378	0.000133887	ENSG00000123119	NECAB1	1		-0.213594	0.0348616	0.191056	0.0527064	3.24756e-05	0	1	0	0
circ27587	circDDX3Y	chrY	12913062	12909360	+	ENSG00000067048	DDX3Y	down		down	hsa.chr5.14497.s	up	-0.242594	0.0193225	ENSG00000173889	PHC3			-0.363402	0.000788553	0.250841	0.0161554	3.24928e-05	0	0	0	1
circ217	circATRNL1_9	chr10	115315736	115120185	+	ENSG00000107518	ATRNL1	down	down_turquoise	down	hsa.miR.130b.5p	up	-0.298159	0.00520265	ENSG00000129003	VPS13C			-0.37301	0.000620523	0.169012	0.076442	3.25653e-05	0	0	1	0
circ5511	circARID1A	chr1	26732792	26729651	+	ENSG00000117713	ARID1A	up		up	hsa.miR.204.3p	down	-0.37186	0.000599038	ENSG00000144827	ABHD10			-0.305196	0.0044418	0.156471	0.0930879	3.26701e-05	0	0	0	1
circ246	circATRNL1_11	chr10	115469329	115120185	+	ENSG00000107518	ATRNL1	down	down_turquoise	down	hsa.miR.107	up	-0.399377	0.00023242	ENSG00000145730	PAM			-0.249506	0.0167657	0.179811	0.0639759	3.28556e-05	0	0	1	0
circ5511	circARID1A	chr1	26732792	26729651	+	ENSG00000117713	ARID1A	up		up	hsa.miR.204.3p	down	-0.37186	0.000599038	ENSG00000130695	CEP85			-0.326083	0.00252941	0.115118	0.166067	3.31251e-05	0	0	0	1
circ19323	circGRK4	chr4	3029409	2984513	+	ENSG00000125388	GRK4	down		down	hsa.miR.450b.5p	up	-0.198287	0.046317	ENSG00000136237	RAPGEF5			-0.469055	1.76195e-05	0.0592939	0.309136	3.32006e-05	0	0	1	0
circ7234	circNEMF_1	chr14	49795791	49831361	-	ENSG00000165525	NEMF		down_turquoise	down	hsa.miR.450b.5p	up	-0.228948	0.0256873	ENSG00000105810	CDK6			-0.372887	0.000622987	0.251868	0.0157935	3.32538e-05	0	0	1	0
circ246	circATRNL1_11	chr10	115469329	115120185	+	ENSG00000107518	ATRNL1	down	down_turquoise	down	hsa.miR.148a.3p	up	-0.358576	0.000919439	ENSG00000089123	TASP1			-0.318557	0.00300965	0.156934	0.0924309	3.36035e-05	0	0	1	0
circ206	circATRNL1_6	chr10	115268444	115120185	+	ENSG00000107518	ATRNL1	down		down	hsa.let.7g.3p	up	-0.414378	0.000133887	ENSG00000129484	PARP2			-0.22973	0.0253812	0.169763	0.0755198	3.37024e-05	0	0	0	1
circ219	circATRNL1_10	chr10	115315736	115215697	+	ENSG00000107518	ATRNL1		down_turquoise	down	hsa.miR.708.5p	up	-0.199181	0.0455711	ENSG00000135318	NT5E			-0.432309	7.74775e-05	0.171948	0.072886	3.3784e-05	0	0	1	0
circ20873	circPARP8	chr5	50763242	50750151	+	ENSG00000151883	PARP8	down		down	hsa.miR.363.3p	up	-0.202403	0.0429616	ENSG00000164828	SUN1			-0.46236	2.33504e-05	0.077676	0.256814	3.38171e-05	0	0	1	0
circ5511	circARID1A	chr1	26732792	26729651	+	ENSG00000117713	ARID1A	up		up	hsa.miR.204.3p	down	-0.37186	0.000599038	ENSG00000111371	SLC38A1			-0.322874	0.0027646	0.119708	0.156544	3.40038e-05	0	0	0	1
circ19323	circGRK4	chr4	3029409	2984513	+	ENSG00000125388	GRK4	down		down	hsa.miR.450b.5p	up	-0.198287	0.046317	ENSG00000028528	SNX1			-0.399574	0.000255461	0.236385	0.0220336	3.41708e-05	0	0	1	0
circ219	circATRNL1_10	chr10	115315736	115215697	+	ENSG00000107518	ATRNL1		down_turquoise	down	hsa.miR.708.5p	up	-0.199181	0.0455711	ENSG00000139155	SLCO1C1			-0.465321	2.0629e-05	0.0702014	0.277536	3.41941e-05	1	0	0	0
circ246	circATRNL1_11	chr10	115469329	115120185	+	ENSG00000107518	ATRNL1	down	down_turquoise	down	hsa.miR.130b.5p	up	-0.286115	0.00706556	ENSG00000129003	VPS13C			-0.37301	0.000620523	0.183591	0.0599999	3.44413e-05	0	0	1	0
circ206	circATRNL1_6	chr10	115268444	115120185	+	ENSG00000107518	ATRNL1	down		down	hsa.let.7g.3p	up	-0.414378	0.000133887	ENSG00000198862	LTN1	1		-0.239541	0.0207362	0.155283	0.0947924	3.44542e-05	0	1	1	0
circ217	circATRNL1_9	chr10	115315736	115120185	+	ENSG00000107518	ATRNL1	down	down_turquoise	down	hsa.miR.130b.5p	up	-0.298159	0.00520265	ENSG00000115760	BIRC6			-0.388282	0.000375723	0.130815	0.134983	3.4533e-05	1	0	1	0
circ246	circATRNL1_11	chr10	115469329	115120185	+	ENSG00000107518	ATRNL1	down	down_turquoise	down	hsa.miR.107	up	-0.399377	0.00023242	ENSG00000065413	ANKRD44			-0.262403	0.0125942	0.158538	0.0901777	3.45449e-05	0	0	1	0
circ15905	circNRXN1_3	chr2	50472298	50620183	-	ENSG00000179915	NRXN1	down		down	hsa.miR.629.5p	up	-0.30334	0.0045432	ENSG00000148737	TCF7L2			-0.310657	0.0038474	0.253853	0.015113	3.45683e-05	1	0	0	0
circ206	circATRNL1_6	chr10	115268444	115120185	+	ENSG00000107518	ATRNL1	down		down	hsa.miR.363.3p	up	-0.317642	0.00308697	ENSG00000198843	SELENOT			-0.3437	0.00152778	0.187424	0.0561638	3.46502e-05	0	0	1	0
circ9676	circPHKB_2	chr16	47596531	47497399	+	ENSG00000102893	PHKB		down_turquoise	down	hsa.miR.708.5p	up	-0.215193	0.0337479	ENSG00000153944	MSI2			-0.463686	2.20926e-05	0.0430396	0.358563	3.49315e-05	0	0	1	0
circ206	circATRNL1_6	chr10	115268444	115120185	+	ENSG00000107518	ATRNL1	down		down	hsa.miR.363.3p	up	-0.317642	0.00308697	ENSG00000215301	DDX3X			-0.341016	0.00165269	0.191336	0.0524463	3.49586e-05	1	0	1	0
circ206	circATRNL1_6	chr10	115268444	115120185	+	ENSG00000107518	ATRNL1	down		down	hsa.miR.363.3p	up	-0.317642	0.00308697	ENSG00000136100	VPS36	1		-0.351536	0.00121006	0.173005	0.0716367	3.49609e-05	0	1	1	0
circ27587	circDDX3Y	chrY	12913062	12909360	+	ENSG00000067048	DDX3Y	down		down	hsa.miR.148a.3p	up	-0.340794	0.00158703	ENSG00000162374	ELAVL4			-0.279976	0.00821959	0.239761	0.0205231	3.49753e-05	0	0	0	1
circ15905	circNRXN1_3	chr2	50472298	50620183	-	ENSG00000179915	NRXN1	down		down	hsa.miR.708.5p	up	-0.216171	0.0331142	ENSG00000146535	GNA12		1	-0.3665	0.000763257	0.269378	0.010594	3.498e-05	0	0	1	0
circ17709	circSLC4A7_1	chr3	27379249	27424152	-	ENSG00000033867	SLC4A7	down		down	hsa.miR.708.5p	up	-0.197115	0.0473089	ENSG00000135318	NT5E			-0.432309	7.74775e-05	0.171748	0.0731248	3.5011e-05	0	0	1	0
circ206	circATRNL1_6	chr10	115268444	115120185	+	ENSG00000107518	ATRNL1	down		down	hsa.miR.363.3p	up	-0.317642	0.00308697	ENSG00000112237	CCNC			-0.348019	0.00134447	0.179069	0.0647798	3.51057e-05	0	0	1	0
circ206	circATRNL1_6	chr10	115268444	115120185	+	ENSG00000107518	ATRNL1	down		down	hsa.miR.363.3p	up	-0.317642	0.00308697	ENSG00000178988	MRFAP1L1			-0.314081	0.00351146	0.230414	0.0249304	3.52639e-05	0	0	1	0
circ17709	circSLC4A7_1	chr3	27379249	27424152	-	ENSG00000033867	SLC4A7	down		down	hsa.miR.708.5p	up	-0.197115	0.0473089	ENSG00000139155	SLCO1C1			-0.465321	2.0629e-05	0.0701398	0.27771	3.53539e-05	1	0	0	0
circ8229	circMGA_1	chr15	41669958	41668828	+	ENSG00000174197	MGA		down_turquoise	down	hsa.miR.450b.5p	up	-0.221453	0.0298575	ENSG00000138760	SCARB2			-0.432247	7.76604e-05	0.140996	0.117055	3.5399e-05	0	0	1	0
circ206	circATRNL1_6	chr10	115268444	115120185	+	ENSG00000107518	ATRNL1	down		down	hsa.miR.363.3p	up	-0.317642	0.00308697	ENSG00000136895	GARNL3	1		-0.402474	0.000230882	0.0357889	0.38186	3.54835e-05	0	1	1	0
circ17709	circSLC4A7_1	chr3	27379249	27424152	-	ENSG00000033867	SLC4A7	down		down	hsa.miR.629.5p	up	-0.197751	0.0467681	ENSG00000127241	MASP1			-0.39689	0.000280321	0.239093	0.0208148	3.5566e-05	0	0	1	0
circ217	circATRNL1_9	chr10	115315736	115120185	+	ENSG00000107518	ATRNL1	down	down_turquoise	down	hsa.miR.130b.5p	up	-0.298159	0.00520265	ENSG00000217128	FNIP1			-0.359496	0.000949434	0.188329	0.0552865	3.55898e-05	0	0	1	0
circ206	circATRNL1_6	chr10	115268444	115120185	+	ENSG00000107518	ATRNL1	down		down	hsa.let.7g.3p	up	-0.414378	0.000133887	ENSG00000087338	GMCL1			-0.227755	0.0264127	0.168376	0.0772285	3.55913e-05	0	0	0	1
circ246	circATRNL1_11	chr10	115469329	115120185	+	ENSG00000107518	ATRNL1	down	down_turquoise	down	hsa.miR.107	up	-0.399377	0.00023242	ENSG00000118600	TMEM5			-0.23334	0.0235813	0.194143	0.0498999	3.56352e-05	0	0	1	0
circ27587	circDDX3Y	chrY	12913062	12909360	+	ENSG00000067048	DDX3Y	down		down	hsa.miR.148a.3p	up	-0.340794	0.00158703	ENSG00000182890	GLUD2			-0.301341	0.0047884	0.211841	0.0359929	3.5639e-05	0	0	1	0
circ5511	circARID1A	chr1	26732792	26729651	+	ENSG00000117713	ARID1A	up		up	hsa.miR.204.3p	down	-0.37186	0.000599038	ENSG00000204116	CHIC1	1		-0.325682	0.0025578	0.108591	0.180227	3.59385e-05	0	0	0	1
circ27587	circDDX3Y	chrY	12913062	12909360	+	ENSG00000067048	DDX3Y	down		down	hsa.miR.148a.3p	up	-0.340794	0.00158703	ENSG00000198718	TOGARAM1			-0.274237	0.00944118	0.244756	0.018446	3.59656e-05	0	0	1	0
circ27587	circDDX3Y	chrY	12913062	12909360	+	ENSG00000067048	DDX3Y	down		down	hsa.miR.148a.3p	up	-0.340794	0.00158703	ENSG00000111530	CAND1			-0.236457	0.0220004	0.28138	0.00794215	3.60703e-05	0	0	1	0
circ206	circATRNL1_6	chr10	115268444	115120185	+	ENSG00000107518	ATRNL1	down		down	hsa.miR.363.3p	up	-0.317642	0.00308697	ENSG00000160131	VMA21			-0.340615	0.00167212	0.189793	0.0538891	3.61685e-05	0	0	1	0
circ246	circATRNL1_11	chr10	115469329	115120185	+	ENSG00000107518	ATRNL1	down	down_turquoise	down	hsa.miR.107	up	-0.399377	0.00023242	ENSG00000133704	IPO8			-0.194465	0.0495999	0.231907	0.0241786	3.6233e-05	0	0	1	0
circ206	circATRNL1_6	chr10	115268444	115120185	+	ENSG00000107518	ATRNL1	down		down	hsa.let.7g.3p	up	-0.414378	0.000133887	ENSG00000114491	UMPS			-0.194403	0.0496543	0.203479	0.0421168	3.6377e-05	0	0	1	0
circ15905	circNRXN1_3	chr2	50472298	50620183	-	ENSG00000179915	NRXN1	down		down	hsa.miR.629.5p	up	-0.30334	0.0045432	ENSG00000114166	KAT2B			-0.365019	0.000799616	0.168481	0.0770981	3.63869e-05	1	0	1	0
circ206	circATRNL1_6	chr10	115268444	115120185	+	ENSG00000107518	ATRNL1	down		down	hsa.let.7g.3p	up	-0.414378	0.000133887	ENSG00000136521	NDUFB5			-0.233555	0.0234771	0.159226	0.0892238	3.64293e-05	0	0	0	1
circ206	circATRNL1_6	chr10	115268444	115120185	+	ENSG00000107518	ATRNL1	down		down	hsa.let.7g.3p	up	-0.414378	0.000133887	ENSG00000170540	ARL6IP1			-0.218684	0.0316031	0.177619	0.0663719	3.64726e-05	0	0	1	0
circ206	circATRNL1_6	chr10	115268444	115120185	+	ENSG00000107518	ATRNL1	down		down	hsa.miR.363.3p	up	-0.317642	0.00308697	ENSG00000163577	EIF5A2	1		-0.350827	0.00123616	0.171338	0.0736151	3.64815e-05	0	1	1	0
circ206	circATRNL1_6	chr10	115268444	115120185	+	ENSG00000107518	ATRNL1	down		down	hsa.miR.363.3p	up	-0.317642	0.00308697	ENSG00000157800	SLC37A3			-0.364001	0.000825514	0.14501	0.110464	3.6548e-05	0	0	1	0
circ246	circATRNL1_11	chr10	115469329	115120185	+	ENSG00000107518	ATRNL1	down	down_turquoise	down	hsa.miR.107	up	-0.399377	0.00023242	ENSG00000152234	ATP5A1	1		-0.245403	0.0183154	0.177713	0.0662678	3.66157e-05	0	0	1	0
circ246	circATRNL1_11	chr10	115469329	115120185	+	ENSG00000107518	ATRNL1	down	down_turquoise	down	hsa.miR.107	up	-0.399377	0.00023242	ENSG00000163788	SNRK			-0.226922	0.0268581	0.199588	0.0452346	3.66472e-05	0	0	1	0
circ206	circATRNL1_6	chr10	115268444	115120185	+	ENSG00000107518	ATRNL1	down		down	hsa.miR.363.3p	up	-0.317642	0.00308697	ENSG00000159256	MORC3			-0.36576	0.000781245	0.140973	0.117094	3.66499e-05	0	0	1	0
circ5511	circARID1A	chr1	26732792	26729651	+	ENSG00000117713	ARID1A	up		up	hsa.miR.204.3p	down	-0.37186	0.000599038	ENSG00000139505	MTMR6			-0.318	0.00315908	0.123059	0.149818	3.67774e-05	0	0	0	1
circ206	circATRNL1_6	chr10	115268444	115120185	+	ENSG00000107518	ATRNL1	down		down	hsa.miR.363.3p	up	-0.317642	0.00308697	ENSG00000069275	NUCKS1			-0.314698	0.00345376	0.227188	0.0266214	3.68129e-05	0	0	1	0
circ246	circATRNL1_11	chr10	115469329	115120185	+	ENSG00000107518	ATRNL1	down	down_turquoise	down	hsa.miR.363.3p	up	-0.222003	0.0295342	ENSG00000164338	UTP15			-0.397538	0.000274126	0.212886	0.0352805	3.70179e-05	0	0	1	0
circ20464	circPPP2R2B	chr5	146691128	146701142	-	ENSG00000156475	PPP2R2B	up		up	hsa.miR.204.3p	down	-0.260596	0.0129827	ENSG00000189180	ZNF33A			-0.415186	0.000146679	0.122119	0.151685	3.73832e-05	0	0	0	1
circ246	circATRNL1_11	chr10	115469329	115120185	+	ENSG00000107518	ATRNL1	down	down_turquoise	down	hsa.miR.130b.5p	up	-0.286115	0.00706556	ENSG00000162702	ZNF281			-0.418703	0.000128988	0.0559982	0.318977	3.75933e-05	0	0	1	0
circ246	circATRNL1_11	chr10	115469329	115120185	+	ENSG00000107518	ATRNL1	down	down_turquoise	down	hsa.miR.130b.5p	up	-0.286115	0.00706556	ENSG00000142892	PIGK			-0.381772	0.00046661	0.159927	0.0882602	3.76243e-05	0	0	1	0
circ206	circATRNL1_6	chr10	115268444	115120185	+	ENSG00000107518	ATRNL1	down		down	hsa.let.7g.3p	up	-0.414378	0.000133887	ENSG00000124733	MEA1			-0.195421	0.0487622	0.200393	0.0445754	3.76283e-05	0	0	0	1
circ246	circATRNL1_11	chr10	115469329	115120185	+	ENSG00000107518	ATRNL1	down	down_turquoise	down	hsa.miR.107	up	-0.399377	0.00023242	ENSG00000198677	TTC37			-0.258515	0.0137468	0.157798	0.0912126	3.76746e-05	0	0	1	0
circ206	circATRNL1_6	chr10	115268444	115120185	+	ENSG00000107518	ATRNL1	down		down	hsa.miR.363.3p	up	-0.317642	0.00308697	ENSG00000170234	PWWP2A			-0.397291	0.000276471	0.0486174	0.341468	3.7675e-05	0	0	1	0
circ27587	circDDX3Y	chrY	12913062	12909360	+	ENSG00000067048	DDX3Y	down		down	hsa.miR.148a.3p	up	-0.340794	0.00158703	ENSG00000196950	SLC39A10	1		-0.295495	0.00557307	0.216006	0.0332206	3.7946e-05	0	1	1	0
circ206	circATRNL1_6	chr10	115268444	115120185	+	ENSG00000107518	ATRNL1	down		down	hsa.let.7g.3p	up	-0.414378	0.000133887	ENSG00000123983	ACSL3			-0.228773	0.0258766	0.16239	0.084931	3.79939e-05	0	0	1	0
circ206	circATRNL1_6	chr10	115268444	115120185	+	ENSG00000107518	ATRNL1	down		down	hsa.miR.363.3p	up	-0.317642	0.00308697	ENSG00000124198	ARFGEF2	1		-0.351166	0.00122361	0.16755	0.0782595	3.81475e-05	0	1	1	0
circ217	circATRNL1_9	chr10	115315736	115120185	+	ENSG00000107518	ATRNL1	down	down_turquoise	down	hsa.miR.130b.5p	up	-0.298159	0.00520265	ENSG00000115368	WDR75			-0.384518	0.000426078	0.13143	0.13385	3.82723e-05	0	0	1	0
circ3518	circEIF4G3_1	chr1	20893517	20942330	-	ENSG00000075151	EIF4G3	down		down	hsa.miR.3938	up	-0.295345	0.0055946	ENSG00000170234	PWWP2A			-0.418641	0.000129281	0.0269155	0.410586	3.83013e-05	0	0	0	1
circ5511	circARID1A	chr1	26732792	26729651	+	ENSG00000117713	ARID1A	up		up	hsa.miR.204.3p	down	-0.37186	0.000599038	ENSG00000138738	PRDM5			-0.273479	0.00975107	0.192949	0.0509708	3.83878e-05	0	0	0	1
circ7234	circNEMF_1	chr14	49795791	49831361	-	ENSG00000165525	NEMF		down_turquoise	down	hsa.miR.450b.5p	up	-0.228948	0.0256873	ENSG00000126803	HSPA2			-0.448291	4.14736e-05	0.0692194	0.280316	3.84895e-05	0	0	1	0
circ206	circATRNL1_6	chr10	115268444	115120185	+	ENSG00000107518	ATRNL1	down		down	hsa.miR.363.3p	up	-0.317642	0.00308697	ENSG00000089818	NECAP1			-0.353172	0.00115179	0.163029	0.0840827	3.85261e-05	0	0	1	0
circ3279	circFAT3	chr11	92355404	92352096	+	ENSG00000165323	FAT3	down	down_turquoise	down	hsa.miR.708.5p	up	-0.276348	0.00911154	ENSG00000116044	NFE2L2			-0.404387	0.000215877	0.121514	0.152895	3.87271e-05	0	0	1	0
circ5511	circARID1A	chr1	26732792	26729651	+	ENSG00000117713	ARID1A	up		up	hsa.miR.204.3p	down	-0.37186	0.000599038	ENSG00000168092	PAFAH1B2			-0.29125	0.00633931	0.166587	0.0794737	3.88465e-05	0	0	1	0
circ206	circATRNL1_6	chr10	115268444	115120185	+	ENSG00000107518	ATRNL1	down		down	hsa.let.7g.3p	up	-0.414378	0.000133887	ENSG00000185787	MORF4L1			-0.200389	0.0445892	0.193409	0.0505556	3.88479e-05	0	0	0	1
circ206	circATRNL1_6	chr10	115268444	115120185	+	ENSG00000107518	ATRNL1	down		down	hsa.miR.363.3p	up	-0.317642	0.00308697	ENSG00000112339	HBS1L			-0.358756	0.000971339	0.151121	0.100936	3.89432e-05	0	0	1	0
circ206	circATRNL1_6	chr10	115268444	115120185	+	ENSG00000107518	ATRNL1	down		down	hsa.miR.363.3p	up	-0.317642	0.00308697	ENSG00000102081	FMR1			-0.346076	0.00142436	0.175422	0.068842	3.89475e-05	1	0	1	0
circ21473	circATG5	chr6	106248150	106308491	-	ENSG00000057663	ATG5	down	down_turquoise	down	hsa.miR.450b.5p	up	-0.202514	0.0428739	ENSG00000126803	HSPA2			-0.448291	4.14736e-05	0.112679	0.171275	3.91562e-05	0	0	1	0
circ246	circATRNL1_11	chr10	115469329	115120185	+	ENSG00000107518	ATRNL1	down	down_turquoise	down	hsa.miR.107	up	-0.399377	0.00023242	ENSG00000136243	NUPL2			-0.228835	0.0258444	0.193063	0.0508681	3.92691e-05	0	0	1	0
circ206	circATRNL1_6	chr10	115268444	115120185	+	ENSG00000107518	ATRNL1	down		down	hsa.let.7g.3p	up	-0.414378	0.000133887	ENSG00000151247	EIF4E			-0.261909	0.0127358	0.108894	0.179554	3.93385e-05	1	0	0	0
circ206	circATRNL1_6	chr10	115268444	115120185	+	ENSG00000107518	ATRNL1	down		down	hsa.let.7g.3p	up	-0.414378	0.000133887	ENSG00000196876	SCN8A	1		-0.289337	0.00664809	0.0474015	0.345229	3.94641e-05	1	1	0	0
circ217	circATRNL1_9	chr10	115315736	115120185	+	ENSG00000107518	ATRNL1	down	down_turquoise	down	hsa.miR.221.3p	up	-0.197542	0.0469456	ENSG00000151150	ANK3	1		-0.442645	5.18903e-05	0.135672	0.126212	3.94832e-05	1	1	1	0
circ206	circATRNL1_6	chr10	115268444	115120185	+	ENSG00000107518	ATRNL1	down		down	hsa.let.7g.3p	up	-0.414378	0.000133887	ENSG00000213585	VDAC1			-0.226953	0.0268415	0.161923	0.0855557	3.94841e-05	0	0	1	0
circ7234	circNEMF_1	chr14	49795791	49831361	-	ENSG00000165525	NEMF		down_turquoise	down	hsa.miR.450b.5p	up	-0.228948	0.0256873	ENSG00000109458	GAB1			-0.432803	7.60289e-05	0.119111	0.157761	3.95561e-05	0	0	1	0
circ3518	circEIF4G3_1	chr1	20893517	20942330	-	ENSG00000075151	EIF4G3	down		down	hsa.miR.3938	up	-0.295345	0.0055946	ENSG00000115365	LANCL1	1		-0.400654	0.000246042	0.0901297	0.224129	3.96022e-05	0	1	0	0
circ206	circATRNL1_6	chr10	115268444	115120185	+	ENSG00000107518	ATRNL1	down		down	hsa.let.7g.3p	up	-0.414378	0.000133887	ENSG00000121741	ZMYM2			-0.222603	0.0292675	0.167067	0.0788673	3.96617e-05	0	0	1	0
circ246	circATRNL1_11	chr10	115469329	115120185	+	ENSG00000107518	ATRNL1	down	down_turquoise	down	hsa.miR.107	up	-0.399377	0.00023242	ENSG00000144136	SLC20A1			-0.218345	0.0318124	0.203877	0.041808	3.96703e-05	0	0	1	0
circ206	circATRNL1_6	chr10	115268444	115120185	+	ENSG00000107518	ATRNL1	down		down	hsa.let.7g.3p	up	-0.414378	0.000133887	ENSG00000065559	MAP2K4			-0.249815	0.0166538	0.128784	0.138769	3.97035e-05	0	0	1	0
circ206	circATRNL1_6	chr10	115268444	115120185	+	ENSG00000107518	ATRNL1	down		down	hsa.miR.363.3p	up	-0.317642	0.00308697	ENSG00000123684	LPGAT1			-0.361224	0.000900045	0.144231	0.111723	3.98153e-05	0	0	1	0
circ27587	circDDX3Y	chrY	12913062	12909360	+	ENSG00000067048	DDX3Y	down		down	hsa.miR.148a.3p	up	-0.340794	0.00158703	ENSG00000134265	NAPG	1		-0.271183	0.0101525	0.242364	0.0194176	4.00904e-05	0	1	1	0
circ206	circATRNL1_6	chr10	115268444	115120185	+	ENSG00000107518	ATRNL1	down		down	hsa.miR.363.3p	up	-0.317642	0.00308697	ENSG00000091844	RGS17			-0.343083	0.00155573	0.178726	0.0651538	4.00945e-05	0	0	1	0
circ246	circATRNL1_11	chr10	115469329	115120185	+	ENSG00000107518	ATRNL1	down	down_turquoise	down	hsa.miR.107	up	-0.399377	0.00023242	ENSG00000164251	F2RL1			-0.288196	0.00683852	0.101074	0.197424	4.0194e-05	0	0	1	0
circ206	circATRNL1_6	chr10	115268444	115120185	+	ENSG00000107518	ATRNL1	down		down	hsa.miR.363.3p	up	-0.317642	0.00308697	ENSG00000104442	ARMC1	1		-0.344749	0.00148132	0.175484	0.068771	4.02711e-05	0	1	1	0
circ5511	circARID1A	chr1	26732792	26729651	+	ENSG00000117713	ARID1A	up		up	hsa.miR.204.3p	down	-0.37186	0.000599038	ENSG00000171877	FRMD5			-0.324232	0.00266282	0.101	0.197598	4.03518e-05	0	0	0	1
circ206	circATRNL1_6	chr10	115268444	115120185	+	ENSG00000107518	ATRNL1	down		down	hsa.miR.363.3p	up	-0.317642	0.00308697	ENSG00000112541	PDE10A	1		-0.376651	0.000551708	0.105964	0.186131	4.05541e-05	0	1	1	0
circ5511	circARID1A	chr1	26732792	26729651	+	ENSG00000117713	ARID1A	up		up	hsa.miR.204.3p	down	-0.37186	0.000599038	ENSG00000036549	ZZZ3			-0.322658	0.0027811	0.104034	0.190541	4.06031e-05	0	0	0	1
circ16286	circZNF638_2	chr2	71427414	71426460	+	ENSG00000075292	ZNF638	down		down	hsa.miR.766.3p	up	-0.311524	0.00365004	ENSG00000153048	CARHSP1			-0.342404	0.00158699	0.188191	0.0554195	4.10039e-05	0	0	0	1
circ7886	circVRK1	chr14	96860735	96833467	+	ENSG00000100749	VRK1		down_turquoise	down	hsa.miR.450b.5p	up	-0.273195	0.00967881	ENSG00000109458	GAB1			-0.432803	7.60289e-05	0.0190672	0.436396	4.1016e-05	0	0	1	0
circ27587	circDDX3Y	chrY	12913062	12909360	+	ENSG00000067048	DDX3Y	down		down	hsa.miR.148a.3p	up	-0.340794	0.00158703	ENSG00000174173	TRMT10C			-0.234822	0.0227636	0.276597	0.0089212	4.11459e-05	0	0	1	0
circ206	circATRNL1_6	chr10	115268444	115120185	+	ENSG00000107518	ATRNL1	down		down	hsa.let.7g.3p	up	-0.414378	0.000133887	ENSG00000117906	RCN2			-0.212668	0.0354823	0.176279	0.0678704	4.11608e-05	0	0	1	0
circ246	circATRNL1_11	chr10	115469329	115120185	+	ENSG00000107518	ATRNL1	down	down_turquoise	down	hsa.miR.107	up	-0.399377	0.00023242	ENSG00000100934	SEC23A	1		-0.253887	0.0152343	0.15735	0.0918421	4.14695e-05	0	1	1	0
circ217	circATRNL1_9	chr10	115315736	115120185	+	ENSG00000107518	ATRNL1	down	down_turquoise	down	hsa.miR.130b.5p	up	-0.298159	0.00520265	ENSG00000047410	TPR			-0.336727	0.00187131	0.215693	0.0334227	4.14922e-05	0	0	1	0
circ27587	circDDX3Y	chrY	12913062	12909360	+	ENSG00000067048	DDX3Y	down		down	hsa.miR.148a.3p	up	-0.340794	0.00158703	ENSG00000134247	PTGFRN			-0.306864	0.00413757	0.194431	0.0496434	4.15576e-05	0	0	1	0
circ217	circATRNL1_9	chr10	115315736	115120185	+	ENSG00000107518	ATRNL1	down	down_turquoise	down	hsa.miR.130b.5p	up	-0.298159	0.00520265	ENSG00000123106	CCDC91			-0.309762	0.0039397	0.251315	0.0159872	4.17481e-05	1	0	0	0
circ217	circATRNL1_9	chr10	115315736	115120185	+	ENSG00000107518	ATRNL1	down	down_turquoise	down	hsa.miR.130b.5p	up	-0.298159	0.00520265	ENSG00000051382	PIK3CB	1		-0.343453	0.00153891	0.205006	0.0409405	4.17589e-05	0	0	1	0
circ246	circATRNL1_11	chr10	115469329	115120185	+	ENSG00000107518	ATRNL1	down	down_turquoise	down	hsa.miR.107	up	-0.399377	0.00023242	ENSG00000138757	G3BP2			-0.242009	0.0196863	0.172916	0.0717422	4.18112e-05	0	0	1	0
circ206	circATRNL1_6	chr10	115268444	115120185	+	ENSG00000107518	ATRNL1	down		down	hsa.let.7g.3p	up	-0.414378	0.000133887	ENSG00000091844	RGS17			-0.209336	0.0377907	0.178726	0.0651538	4.19674e-05	0	0	0	1
circ206	circATRNL1_6	chr10	115268444	115120185	+	ENSG00000107518	ATRNL1	down		down	hsa.miR.363.3p	up	-0.317642	0.00308697	ENSG00000136197	C7orf25			-0.364556	0.000811296	0.132618	0.13168	4.19818e-05	0	0	1	0
circ206	circATRNL1_6	chr10	115268444	115120185	+	ENSG00000107518	ATRNL1	down		down	hsa.let.7g.3p	up	-0.414378	0.000133887	ENSG00000171735	CAMTA1	1		-0.281316	0.00808959	0.0608535	0.304524	4.19864e-05	1	1	0	0
circ246	circATRNL1_11	chr10	115469329	115120185	+	ENSG00000107518	ATRNL1	down	down_turquoise	down	hsa.miR.130b.5p	up	-0.286115	0.00706556	ENSG00000163697	APBB2			-0.418919	0.000127969	0.040618	0.36648	4.21571e-05	0	0	1	0
circ206	circATRNL1_6	chr10	115268444	115120185	+	ENSG00000107518	ATRNL1	down		down	hsa.miR.363.3p	up	-0.317642	0.00308697	ENSG00000070087	PFN2			-0.354498	0.00110638	0.153693	0.0971069	4.21899e-05	0	0	1	0
circ16286	circZNF638_2	chr2	71427414	71426460	+	ENSG00000075292	ZNF638	down		down	hsa.miR.766.3p	up	-0.311524	0.00365004	ENSG00000163430	FSTL1			-0.348081	0.001342	0.17623	0.0679255	4.23086e-05	0	0	1	0
circ246	circATRNL1_11	chr10	115469329	115120185	+	ENSG00000107518	ATRNL1	down	down_turquoise	down	hsa.miR.107	up	-0.399377	0.00023242	ENSG00000173275	ZNF449	1		-0.223343	0.0288423	0.194281	0.0497764	4.24149e-05	0	1	1	0
circ246	circATRNL1_11	chr10	115469329	115120185	+	ENSG00000107518	ATRNL1	down	down_turquoise	down	hsa.miR.107	up	-0.399377	0.00023242	ENSG00000157470	FAM81A	1		-0.219672	0.0310008	0.198246	0.0463512	4.24473e-05	0	1	1	0
circ217	circATRNL1_9	chr10	115315736	115120185	+	ENSG00000107518	ATRNL1	down	down_turquoise	down	hsa.miR.130b.5p	up	-0.298159	0.00520265	ENSG00000106460	TMEM106B			-0.361132	0.000902631	0.173448	0.0711183	4.24481e-05	0	0	1	0
circ217	circATRNL1_9	chr10	115315736	115120185	+	ENSG00000107518	ATRNL1	down	down_turquoise	down	hsa.miR.130b.5p	up	-0.298159	0.00520265	ENSG00000104231	ZFAND1			-0.37301	0.000620523	0.148723	0.104602	4.28611e-05	0	0	0	1
circ7234	circNEMF_1	chr14	49795791	49831361	-	ENSG00000165525	NEMF		down_turquoise	down	hsa.miR.450b.5p	up	-0.228948	0.0256873	ENSG00000150867	PIP4K2A			-0.41932	0.000126095	0.148167	0.105466	4.32956e-05	0	0	1	0
circ8229	circMGA_1	chr15	41669958	41668828	+	ENSG00000174197	MGA		down_turquoise	down	hsa.miR.450b.5p	up	-0.221453	0.0298575	ENSG00000153002	CPB1			-0.340244	0.00169024	0.287703	0.00679098	4.34181e-05	0	0	1	0
circ206	circATRNL1_6	chr10	115268444	115120185	+	ENSG00000107518	ATRNL1	down		down	hsa.chr9.24118.m	up	-0.339495	0.0016496	ENSG00000173848	NET1	1		-0.264161	0.0121005	0.247997	0.0171944	4.34735e-05	0	1	0	0
circ246	circATRNL1_11	chr10	115469329	115120185	+	ENSG00000107518	ATRNL1	down	down_turquoise	down	hsa.miR.130b.5p	up	-0.286115	0.00706556	ENSG00000168214	RBPJ			-0.402228	0.000232886	0.0961843	0.209116	4.35706e-05	0	0	1	0
circ217	circATRNL1_9	chr10	115315736	115120185	+	ENSG00000107518	ATRNL1	down	down_turquoise	down	hsa.miR.130b.5p	up	-0.298159	0.00520265	ENSG00000079950	STX7			-0.357491	0.00100982	0.178225	0.0657033	4.36918e-05	0	0	1	0
circ206	circATRNL1_6	chr10	115268444	115120185	+	ENSG00000107518	ATRNL1	down		down	hsa.miR.363.3p	up	-0.317642	0.00308697	ENSG00000206560	ANKRD28	1		-0.35746	0.00101077	0.144808	0.11079	4.37474e-05	0	1	1	0
circ246	circATRNL1_11	chr10	115469329	115120185	+	ENSG00000107518	ATRNL1	down	down_turquoise	down	hsa.miR.148a.3p	up	-0.358576	0.000919439	ENSG00000135776	ABCB10			-0.257777	0.0138401	0.226045	0.0272425	4.38554e-05	0	0	1	0
circ206	circATRNL1_6	chr10	115268444	115120185	+	ENSG00000107518	ATRNL1	down		down	hsa.let.7g.3p	up	-0.414378	0.000133887	ENSG00000036257	CUL3			-0.218684	0.0316031	0.164043	0.0827506	4.42394e-05	1	0	1	0
circ15748	circSLC8A1	chr2	40428473	40430304	-	ENSG00000183023	SLC8A1		down_turquoise	down	hsa.miR.708.5p	up	-0.275546	0.00928659	ENSG00000168309	FAM107A		1	-0.427373	9.34339e-05	0.0284076	0.405718	4.44487e-05	0	0	1	0
circ217	circATRNL1_9	chr10	115315736	115120185	+	ENSG00000107518	ATRNL1	down	down_turquoise	down	hsa.miR.708.5p	up	-0.296191	0.00547408	ENSG00000140443	IGF1R			-0.208596	0.0383197	0.338759	0.00168602	4.46289e-05	0	0	1	0
circ206	circATRNL1_6	chr10	115268444	115120185	+	ENSG00000107518	ATRNL1	down		down	hsa.let.7g.3p	up	-0.414378	0.000133887	ENSG00000088179	PTPN4			-0.246699	0.0178136	0.123718	0.148517	4.46893e-05	0	0	0	1
circ246	circATRNL1_11	chr10	115469329	115120185	+	ENSG00000107518	ATRNL1	down	down_turquoise	down	hsa.miR.107	up	-0.399377	0.00023242	ENSG00000175893	ZDHHC21			-0.24565	0.0182189	0.163305	0.083719	4.47212e-05	0	0	1	0
circ246	circATRNL1_11	chr10	115469329	115120185	+	ENSG00000107518	ATRNL1	down	down_turquoise	down	hsa.miR.107	up	-0.399377	0.00023242	ENSG00000103160	HSDL1			-0.242163	0.0196221	0.167948	0.0777609	4.47357e-05	0	0	1	0
circ246	circATRNL1_11	chr10	115469329	115120185	+	ENSG00000107518	ATRNL1	down	down_turquoise	down	hsa.miR.130b.5p	up	-0.286115	0.00706556	ENSG00000108443	RPS6KB1			-0.365297	0.000792682	0.180382	0.0633629	4.47626e-05	0	0	1	0
circ17709	circSLC4A7_1	chr3	27379249	27424152	-	ENSG00000033867	SLC4A7	down		down	hsa.miR.629.5p	up	-0.197751	0.0467681	ENSG00000026508	CD44			-0.362767	0.000857921	0.276802	0.00887713	4.49061e-05	1	0	1	0
circ5511	circARID1A	chr1	26732792	26729651	+	ENSG00000117713	ARID1A	up		up	hsa.miR.204.3p	down	-0.37186	0.000599038	ENSG00000123106	CCDC91			-0.293564	0.00598254	0.152152	0.0993883	4.49065e-05	1	0	0	0
circ206	circATRNL1_6	chr10	115268444	115120185	+	ENSG00000107518	ATRNL1	down		down	hsa.miR.363.3p	up	-0.317642	0.00308697	ENSG00000128590	DNAJB9			-0.374368	0.000594002	0.102285	0.194591	4.4976e-05	0	0	1	0
circ27587	circDDX3Y	chrY	12913062	12909360	+	ENSG00000067048	DDX3Y	down		down	hsa.miR.148a.3p	up	-0.340794	0.00158703	ENSG00000009335	UBE3C			-0.245112	0.0183049	0.262979	0.0122934	4.50107e-05	1	0	1	0
circ246	circATRNL1_11	chr10	115469329	115120185	+	ENSG00000107518	ATRNL1	down	down_turquoise	down	hsa.miR.107	up	-0.399377	0.00023242	ENSG00000138185	ENTPD1			-0.196902	0.0474872	0.217344	0.0323675	4.50227e-05	0	0	0	1
circ619	circZMYND11_2	chr10	249088	179994	+	ENSG00000015171	ZMYND11		down_turquoise	down	hsa.miR.708.5p	up	-0.265587	0.0115747	ENSG00000168309	FAM107A		1	-0.427373	9.34339e-05	0.0519111	0.331358	4.51455e-05	0	0	1	0
circ206	circATRNL1_6	chr10	115268444	115120185	+	ENSG00000107518	ATRNL1	down		down	hsa.miR.363.3p	up	-0.317642	0.00308697	ENSG00000091039	OSBPL8			-0.343206	0.0015501	0.170262	0.0749124	4.51578e-05	0	0	1	0
circ246	circATRNL1_11	chr10	115469329	115120185	+	ENSG00000107518	ATRNL1	down	down_turquoise	down	hsa.miR.107	up	-0.399377	0.00023242	ENSG00000115561	CHMP3			-0.231242	0.0246141	0.18103	0.0626725	4.51658e-05	0	0	1	0
circ206	circATRNL1_6	chr10	115268444	115120185	+	ENSG00000107518	ATRNL1	down		down	hsa.let.7g.3p	up	-0.414378	0.000133887	ENSG00000113597	TRAPPC13			-0.194558	0.0495183	0.189419	0.0542434	4.52857e-05	0	0	0	1
circ202	circATRNL1_5	chr10	115241725	115120185	+	ENSG00000107518	ATRNL1	down		down	hsa.miR.363.3p	up	-0.209506	0.0376264	ENSG00000065883	CDK13			-0.445977	4.54827e-05	0.0955746	0.210601	4.53721e-05	1	0	1	0
circ246	circATRNL1_11	chr10	115469329	115120185	+	ENSG00000107518	ATRNL1	down	down_turquoise	down	hsa.miR.708.5p	up	-0.280353	0.00814435	ENSG00000026508	CD44			-0.413921	0.000153569	0.0663978	0.288379	4.54018e-05	1	0	1	0
circ206	circATRNL1_6	chr10	115268444	115120185	+	ENSG00000107518	ATRNL1	down		down	hsa.miR.363.3p	up	-0.317642	0.00308697	ENSG00000206418	RAB12			-0.351197	0.00122248	0.154675	0.0956726	4.54418e-05	0	0	1	0
circ206	circATRNL1_6	chr10	115268444	115120185	+	ENSG00000107518	ATRNL1	down		down	hsa.let.7g.3p	up	-0.414378	0.000133887	ENSG00000122824	NUDT10			-0.203906	0.0418094	0.179163	0.0646781	4.55525e-05	0	0	0	1
circ27587	circDDX3Y	chrY	12913062	12909360	+	ENSG00000067048	DDX3Y	down		down	hsa.miR.148a.3p	up	-0.340794	0.00158703	ENSG00000103769	RAB11A			-0.264349	0.0119113	0.242933	0.0191825	4.5615e-05	0	0	1	0
circ246	circATRNL1_11	chr10	115469329	115120185	+	ENSG00000107518	ATRNL1	down	down_turquoise	down	hsa.miR.363.3p	up	-0.222003	0.0295342	ENSG00000136152	COG3			-0.411113	0.000169938	0.172268	0.0725068	4.57568e-05	0	0	1	0
circ246	circATRNL1_11	chr10	115469329	115120185	+	ENSG00000107518	ATRNL1	down	down_turquoise	down	hsa.miR.107	up	-0.399377	0.00023242	ENSG00000165169	DYNLT3			-0.247131	0.0176489	0.159525	0.0888111	4.57996e-05	0	0	1	0
circ217	circATRNL1_9	chr10	115315736	115120185	+	ENSG00000107518	ATRNL1	down	down_turquoise	down	hsa.miR.130b.5p	up	-0.298159	0.00520265	ENSG00000171204	TMEM126B			-0.376034	0.00056286	0.136644	0.124506	4.58326e-05	0	0	0	1
circ246	circATRNL1_11	chr10	115469329	115120185	+	ENSG00000107518	ATRNL1	down	down_turquoise	down	hsa.miR.363.3p	up	-0.222003	0.0295342	ENSG00000163053	SLC16A14			-0.426694	9.5851e-05	0.134056	0.129086	4.59236e-05	0	0	1	0
circ15905	circNRXN1_3	chr2	50472298	50620183	-	ENSG00000179915	NRXN1	down		down	hsa.miR.708.5p	up	-0.216171	0.0331142	ENSG00000091656	ZFHX4			-0.367765	0.000733392	0.253884	0.0151026	4.60717e-05	0	0	1	0
circ206	circATRNL1_6	chr10	115268444	115120185	+	ENSG00000107518	ATRNL1	down		down	hsa.miR.363.3p	up	-0.317642	0.00308697	ENSG00000081019	RSBN1			-0.365605	0.000785041	0.12219	0.151543	4.61235e-05	0	0	1	0
circ27587	circDDX3Y	chrY	12913062	12909360	+	ENSG00000067048	DDX3Y	down		down	hsa.miR.148a.3p	up	-0.340794	0.00158703	ENSG00000106415	GLCCI1			-0.262096	0.0125449	0.244626	0.0184978	4.62365e-05	0	0	1	0
circ206	circATRNL1_6	chr10	115268444	115120185	+	ENSG00000107518	ATRNL1	down		down	hsa.miR.363.3p	up	-0.317642	0.00308697	ENSG00000147133	TAF1			-0.36431	0.000817587	0.124918	0.146168	4.63059e-05	1	0	1	0
circ217	circATRNL1_9	chr10	115315736	115120185	+	ENSG00000107518	ATRNL1	down	down_turquoise	down	hsa.miR.708.5p	up	-0.296191	0.00547408	ENSG00000106785	TRIM14			-0.292114	0.00620401	0.268248	0.0108786	4.63653e-05	0	0	1	0
circ7886	circVRK1	chr14	96860735	96833467	+	ENSG00000100749	VRK1		down_turquoise	down	hsa.miR.450b.5p	up	-0.273195	0.00967881	ENSG00000182359	KBTBD3			-0.376589	0.000552814	0.175214	0.0690785	4.63827e-05	0	0	1	0
circ246	circATRNL1_11	chr10	115469329	115120185	+	ENSG00000107518	ATRNL1	down	down_turquoise	down	hsa.miR.363.3p	up	-0.222003	0.0295342	ENSG00000165813	CCDC186			-0.428854	8.83543e-05	0.127192	0.141786	4.6424e-05	0	0	1	0
circ206	circATRNL1_6	chr10	115268444	115120185	+	ENSG00000107518	ATRNL1	down		down	hsa.miR.363.3p	up	-0.317642	0.00308697	ENSG00000095261	PSMD5			-0.384426	0.00042739	0.0685538	0.282209	4.66809e-05	0	0	1	0
circ206	circATRNL1_6	chr10	115268444	115120185	+	ENSG00000107518	ATRNL1	down		down	hsa.let.7g.3p	up	-0.414378	0.000133887	ENSG00000137364	TPMT			-0.23081	0.0248313	0.143841	0.112356	4.68132e-05	0	0	0	1
circ206	circATRNL1_6	chr10	115268444	115120185	+	ENSG00000107518	ATRNL1	down		down	hsa.let.7g.3p	up	-0.414378	0.000133887	ENSG00000177879	AP3S1			-0.245125	0.0184245	0.12219	0.151543	4.68447e-05	0	0	0	1
circ27587	circDDX3Y	chrY	12913062	12909360	+	ENSG00000067048	DDX3Y	down		down	hsa.miR.148a.3p	up	-0.340794	0.00158703	ENSG00000157502	MUM1L1			-0.248845	0.0168789	0.257398	0.013959	4.68555e-05	0	0	0	1
circ8229	circMGA_1	chr15	41669958	41668828	+	ENSG00000174197	MGA		down_turquoise	down	hsa.miR.450b.5p	up	-0.221453	0.0298575	ENSG00000065413	ANKRD44			-0.44644	4.46532e-05	0.0690166	0.280892	4.6918e-05	0	0	1	0
circ206	circATRNL1_6	chr10	115268444	115120185	+	ENSG00000107518	ATRNL1	down		down	hsa.miR.363.3p	up	-0.317642	0.00308697	ENSG00000100528	CNIH1			-0.34805	0.00134323	0.1584	0.0903702	4.69428e-05	0	0	1	0
circ246	circATRNL1_11	chr10	115469329	115120185	+	ENSG00000107518	ATRNL1	down	down_turquoise	down	hsa.miR.107	up	-0.399377	0.00023242	ENSG00000046647	GEMIN8			-0.238986	0.0209787	0.168211	0.0774341	4.72533e-05	0	0	1	0
circ206	circATRNL1_6	chr10	115268444	115120185	+	ENSG00000107518	ATRNL1	down		down	hsa.let.7g.3p	up	-0.414378	0.000133887	ENSG00000171004	HS6ST2			-0.243027	0.0192663	0.124435	0.147111	4.74627e-05	0	0	0	1
circ206	circATRNL1_6	chr10	115268444	115120185	+	ENSG00000107518	ATRNL1	down		down	hsa.miR.363.3p	up	-0.317642	0.00308697	ENSG00000101811	CSTF2			-0.251203	0.0161578	0.283069	0.00761942	4.75254e-05	0	0	1	0
circ19323	circGRK4	chr4	3029409	2984513	+	ENSG00000125388	GRK4	down		down	hsa.miR.450b.5p	up	-0.198287	0.046317	ENSG00000138760	SCARB2			-0.432247	7.76604e-05	0.147886	0.105904	4.76223e-05	0	0	1	0
circ27587	circDDX3Y	chrY	12913062	12909360	+	ENSG00000067048	DDX3Y	down		down	hsa.miR.148a.3p	up	-0.340794	0.00158703	ENSG00000134759	ELP2			-0.205466	0.040592	0.293063	0.00593104	4.77475e-05	0	0	1	0
circ206	circATRNL1_6	chr10	115268444	115120185	+	ENSG00000107518	ATRNL1	down		down	hsa.miR.148a.3p	up	-0.332569	0.00202179	ENSG00000213047	DENND1B			-0.257438	0.0139465	0.258628	0.0135765	4.78276e-05	0	0	1	0
circ27587	circDDX3Y	chrY	12913062	12909360	+	ENSG00000067048	DDX3Y	down		down	hsa.miR.148a.3p	up	-0.340794	0.00158703	ENSG00000152332	UHMK1			-0.225042	0.027797	0.277687	0.00868942	4.7884e-05	0	0	1	0
circ206	circATRNL1_6	chr10	115268444	115120185	+	ENSG00000107518	ATRNL1	down		down	hsa.miR.363.3p	up	-0.317642	0.00308697	ENSG00000076003	MCM6			-0.317444	0.00320704	0.207921	0.0387679	4.79356e-05	0	0	1	0
circ21473	circATG5	chr6	106248150	106308491	-	ENSG00000057663	ATG5	down	down_turquoise	down	hsa.miR.450b.5p	up	-0.202514	0.0428739	ENSG00000138760	SCARB2			-0.432247	7.76604e-05	0.14198	0.115415	4.79882e-05	0	0	1	0
circ246	circATRNL1_11	chr10	115469329	115120185	+	ENSG00000107518	ATRNL1	down	down_turquoise	down	hsa.miR.107	up	-0.399377	0.00023242	ENSG00000070269	TMEM260			-0.226706	0.0269746	0.181971	0.06168	4.82513e-05	0	0	1	0
circ217	circATRNL1_9	chr10	115315736	115120185	+	ENSG00000107518	ATRNL1	down	down_turquoise	down	hsa.miR.130b.5p	up	-0.298159	0.00520265	ENSG00000123684	LPGAT1			-0.36468	0.000808166	0.157143	0.0921349	4.83267e-05	0	0	1	0
circ202	circATRNL1_5	chr10	115241725	115120185	+	ENSG00000107518	ATRNL1	down		down	hsa.miR.363.3p	up	-0.209506	0.0376264	ENSG00000164828	SUN1			-0.46236	2.33504e-05	0.0172684	0.442353	4.84637e-05	0	0	1	0
circ27587	circDDX3Y	chrY	12913062	12909360	+	ENSG00000067048	DDX3Y	down		down	hsa.miR.148a.3p	up	-0.340794	0.00158703	ENSG00000120137	PANK3			-0.241039	0.0199738	0.262962	0.012298	4.85931e-05	0	0	1	0
circ246	circATRNL1_11	chr10	115469329	115120185	+	ENSG00000107518	ATRNL1	down	down_turquoise	down	hsa.miR.107	up	-0.399377	0.00023242	ENSG00000111371	SLC38A1			-0.250093	0.0165536	0.150578	0.101758	4.87743e-05	0	0	1	0
circ27587	circDDX3Y	chrY	12913062	12909360	+	ENSG00000067048	DDX3Y	down		down	hsa.miR.148a.3p	up	-0.340794	0.00158703	ENSG00000139926	FRMD6			-0.303054	0.00457766	0.18968	0.0539957	4.88584e-05	0	0	1	0
circ246	circATRNL1_11	chr10	115469329	115120185	+	ENSG00000107518	ATRNL1	down	down_turquoise	down	hsa.miR.107	up	-0.399377	0.00023242	ENSG00000120805	ARL1			-0.237844	0.0214847	0.167254	0.078631	4.88985e-05	0	0	1	0
circ21473	circATG5	chr6	106248150	106308491	-	ENSG00000057663	ATG5	down	down_turquoise	down	hsa.miR.450b.5p	up	-0.202514	0.0428739	ENSG00000070214	SLC44A1			-0.436474	6.60154e-05	0.128805	0.13873	4.88995e-05	0	0	1	0
circ206	circATRNL1_6	chr10	115268444	115120185	+	ENSG00000107518	ATRNL1	down		down	hsa.let.7g.3p	up	-0.414378	0.000133887	ENSG00000123684	LPGAT1			-0.228033	0.0262656	0.144231	0.111723	4.89251e-05	0	0	0	1
circ206	circATRNL1_6	chr10	115268444	115120185	+	ENSG00000107518	ATRNL1	down		down	hsa.miR.148a.3p	up	-0.332569	0.00202179	ENSG00000123570	RAB9B			-0.311384	0.00366392	0.190666	0.0530693	4.89504e-05	0	0	0	1
circ27587	circDDX3Y	chrY	12913062	12909360	+	ENSG00000067048	DDX3Y	down		down	hsa.chr5.14497.s	up	-0.242594	0.0193225	ENSG00000076554	TPD52			-0.287026	0.00690699	0.319307	0.00294764	4.89802e-05	0	0	0	1
circ3279	circFAT3	chr11	92355404	92352096	+	ENSG00000165323	FAT3	down	down_turquoise	down	hsa.miR.708.5p	up	-0.276348	0.00911154	ENSG00000101888	NXT2			-0.407565	0.000192913	0.0896902	0.225242	4.92544e-05	0	0	1	0
circ15905	circNRXN1_3	chr2	50472298	50620183	-	ENSG00000179915	NRXN1	down		down	hsa.miR.708.5p	up	-0.216171	0.0331142	ENSG00000171766	GATM			-0.417808	0.000133292	0.158875	0.08971	4.926e-05	1	0	1	0
circ217	circATRNL1_9	chr10	115315736	115120185	+	ENSG00000107518	ATRNL1	down	down_turquoise	down	hsa.miR.130b.5p	up	-0.298159	0.00520265	ENSG00000123560	PLP1			-0.396952	0.000279725	0.0720056	0.272462	4.93198e-05	0	0	0	1
circ27587	circDDX3Y	chrY	12913062	12909360	+	ENSG00000067048	DDX3Y	down		down	hsa.miR.148a.3p	up	-0.340794	0.00158703	ENSG00000132640	BTBD3			-0.278618	0.00849557	0.222172	0.029435	4.93574e-05	0	0	1	0
circ27587	circDDX3Y	chrY	12913062	12909360	+	ENSG00000067048	DDX3Y	down		down	hsa.miR.148a.3p	up	-0.340794	0.00158703	ENSG00000058091	CDK14	1		-0.285776	0.00712548	0.21311	0.0351293	4.93998e-05	0	1	1	0
circ202	circATRNL1_5	chr10	115241725	115120185	+	ENSG00000107518	ATRNL1	down		down	hsa.miR.363.3p	up	-0.209506	0.0376264	ENSG00000165813	CCDC186			-0.428854	8.83543e-05	0.139375	0.119794	4.95078e-05	0	0	1	0
circ206	circATRNL1_6	chr10	115268444	115120185	+	ENSG00000107518	ATRNL1	down		down	hsa.miR.363.3p	up	-0.317642	0.00308697	ENSG00000170871	KIAA0232			-0.371498	0.00065132	0.100664	0.198391	4.95769e-05	0	0	1	0
circ27587	circDDX3Y	chrY	12913062	12909360	+	ENSG00000067048	DDX3Y	down		down	hsa.miR.148a.3p	up	-0.340794	0.00158703	ENSG00000148925	BTBD10			-0.270365	0.0103505	0.23156	0.0243513	4.96989e-05	0	0	1	0
circ27587	circDDX3Y	chrY	12913062	12909360	+	ENSG00000067048	DDX3Y	down		down	hsa.miR.148a.3p	up	-0.340794	0.00158703	ENSG00000114573	ATP6V1A			-0.254337	0.0149508	0.24884	0.0168808	4.97563e-05	0	0	1	0
circ217	circATRNL1_9	chr10	115315736	115120185	+	ENSG00000107518	ATRNL1	down	down_turquoise	down	hsa.miR.130b.5p	up	-0.298159	0.00520265	ENSG00000135972	MRPS9	1		-0.359743	0.000942232	0.164786	0.0817838	4.97969e-05	0	0	1	0
circ27587	circDDX3Y	chrY	12913062	12909360	+	ENSG00000067048	DDX3Y	down		down	hsa.miR.148a.3p	up	-0.340794	0.00158703	ENSG00000119965	C10orf88			-0.245945	0.0179783	0.256991	0.0140875	4.99091e-05	0	0	1	0
circ27587	circDDX3Y	chrY	12913062	12909360	+	ENSG00000067048	DDX3Y	down		down	hsa.miR.148a.3p	up	-0.340794	0.00158703	ENSG00000047621	C12orf4			-0.23783	0.021376	0.264459	0.0118809	5.00291e-05	0	0	1	0
circ5511	circARID1A	chr1	26732792	26729651	+	ENSG00000117713	ARID1A	up		up	hsa.miR.204.3p	down	-0.37186	0.000599038	ENSG00000165511	C10orf25			-0.284432	0.00750037	0.158869	0.0897176	5.00343e-05	0	0	0	1
circ500	circSUV39H2	chr10	14897517	14896846	+	ENSG00000152457	DCLRE1C		down_turquoise	down	hsa.miR.450b.5p	up	-0.233641	0.0233285	ENSG00000126803	HSPA2			-0.448291	4.14736e-05	0.024146	0.419656	5.03509e-05	0	0	1	0
circ27587	circDDX3Y	chrY	12913062	12909360	+	ENSG00000067048	DDX3Y	down		down	hsa.miR.148a.3p	up	-0.340794	0.00158703	ENSG00000150625	GPM6A			-0.285298	0.00721067	0.212378	0.0356255	5.05304e-05	0	0	0	1
circ206	circATRNL1_6	chr10	115268444	115120185	+	ENSG00000107518	ATRNL1	down		down	hsa.miR.363.3p	up	-0.317642	0.00308697	ENSG00000182552	RWDD4			-0.32019	0.00297604	0.200439	0.0445373	5.06906e-05	0	0	1	0
circ27587	circDDX3Y	chrY	12913062	12909360	+	ENSG00000067048	DDX3Y	down		down	hsa.miR.148a.3p	up	-0.340794	0.00158703	ENSG00000155744	FAM126B			-0.204478	0.0413442	0.290996	0.00625068	5.07959e-05	0	0	1	0
circ206	circATRNL1_6	chr10	115268444	115120185	+	ENSG00000107518	ATRNL1	down		down	hsa.let.7g.3p	up	-0.414378	0.000133887	ENSG00000198648	STK39			-0.247933	0.0173464	0.110219	0.176628	5.08041e-05	1	0	1	0
circ15905	circNRXN1_3	chr2	50472298	50620183	-	ENSG00000179915	NRXN1	down		down	hsa.miR.629.5p	up	-0.30334	0.0045432	ENSG00000107968	MAP3K8			-0.40232	0.000232132	0.0334049	0.389522	5.08677e-05	0	0	1	0
circ27587	circDDX3Y	chrY	12913062	12909360	+	ENSG00000067048	DDX3Y	down		down	hsa.miR.148a.3p	up	-0.340794	0.00158703	ENSG00000177565	TBL1XR1			-0.227047	0.026697	0.273034	0.00971615	5.09611e-05	1	0	1	0
circ5511	circARID1A	chr1	26732792	26729651	+	ENSG00000117713	ARID1A	up		up	hsa.miR.204.3p	down	-0.37186	0.000599038	ENSG00000146374	RSPO3			-0.243891	0.0189159	0.211323	0.0363501	5.09861e-05	0	0	0	1
circ206	circATRNL1_6	chr10	115268444	115120185	+	ENSG00000107518	ATRNL1	down		down	hsa.miR.363.3p	up	-0.317642	0.00308697	ENSG00000070367	EXOC5			-0.3466	0.00140239	0.154908	0.0953334	5.10745e-05	1	0	1	0
circ206	circATRNL1_6	chr10	115268444	115120185	+	ENSG00000107518	ATRNL1	down		down	hsa.miR.363.3p	up	-0.317642	0.00308697	ENSG00000113580	NR3C1			-0.373843	0.000604124	0.0911088	0.221661	5.11465e-05	0	0	1	0
circ206	circATRNL1_6	chr10	115268444	115120185	+	ENSG00000107518	ATRNL1	down		down	hsa.let.7g.3p	up	-0.414378	0.000133887	ENSG00000064309	CDON			-0.282519	0.00785749	0.0322817	0.393147	5.11701e-05	0	0	1	0
circ217	circATRNL1_9	chr10	115315736	115120185	+	ENSG00000107518	ATRNL1	down	down_turquoise	down	hsa.chr5.14497.s	up	-0.251479	0.0159295	ENSG00000129003	VPS13C			-0.388594	0.000340134	0.169012	0.076442	5.12325e-05	0	0	0	1
circ206	circATRNL1_6	chr10	115268444	115120185	+	ENSG00000107518	ATRNL1	down		down	hsa.let.7g.3p	up	-0.414378	0.000133887	ENSG00000126858	RHOT1			-0.220011	0.0307959	0.151339	0.100607	5.13023e-05	0	0	0	1
circ22526	circADGRB3_4	chr6	69063036	68993768	+	ENSG00000135298	ADGRB3	down		down	hsa.miR.107	up	-0.28433	0.0073857	ENSG00000187908	DMBT1			-0.228619	0.0259573	0.330123	0.00217008	5.14329e-05	0	0	1	0
circ246	circATRNL1_11	chr10	115469329	115120185	+	ENSG00000107518	ATRNL1	down	down_turquoise	down	hsa.miR.148a.3p	up	-0.358576	0.000919439	ENSG00000066382	MPPED2	1		-0.321951	0.00273773	0.115359	0.165558	5.15091e-05	0	1	1	0
circ206	circATRNL1_6	chr10	115268444	115120185	+	ENSG00000107518	ATRNL1	down		down	hsa.miR.148a.3p	up	-0.332569	0.00202179	ENSG00000188674	C2orf80			-0.249462	0.0166523	0.26254	0.0124179	5.16539e-05	0	0	0	1
circ15905	circNRXN1_3	chr2	50472298	50620183	-	ENSG00000179915	NRXN1	down		down	hsa.miR.629.5p	up	-0.30334	0.0045432	ENSG00000075420	FNDC3B		1	-0.408336	0.000187689	0.00288187	0.490347	5.16585e-05	0	0	1	0
circ500	circSUV39H2	chr10	14897517	14896846	+	ENSG00000152457	DCLRE1C		down_turquoise	down	hsa.miR.450b.5p	up	-0.233641	0.0233285	ENSG00000166147	FBN1			-0.381896	0.000464715	0.208184	0.0385771	5.16688e-05	1	0	1	0
circ246	circATRNL1_11	chr10	115469329	115120185	+	ENSG00000107518	ATRNL1	down	down_turquoise	down	hsa.miR.107	up	-0.399377	0.00023242	ENSG00000182890	GLUD2			-0.267802	0.0111306	0.117056	0.162002	5.17633e-05	0	0	0	1
circ206	circATRNL1_6	chr10	115268444	115120185	+	ENSG00000107518	ATRNL1	down		down	hsa.let.7g.3p	up	-0.414378	0.000133887	ENSG00000143106	PSMA5			-0.19647	0.0478563	0.178446	0.065461	5.17996e-05	0	0	0	1
circ27587	circDDX3Y	chrY	12913062	12909360	+	ENSG00000067048	DDX3Y	down		down	hsa.miR.148a.3p	up	-0.340794	0.00158703	ENSG00000089123	TASP1			-0.318557	0.00300965	0.15984	0.0883783	5.20906e-05	0	0	1	0
circ246	circATRNL1_11	chr10	115469329	115120185	+	ENSG00000107518	ATRNL1	down	down_turquoise	down	hsa.miR.107	up	-0.399377	0.00023242	ENSG00000089818	NECAP1			-0.247192	0.0176254	0.149591	0.103265	5.21868e-05	0	0	1	0
circ27587	circDDX3Y	chrY	12913062	12909360	+	ENSG00000067048	DDX3Y	down		down	hsa.miR.148a.3p	up	-0.340794	0.00158703	ENSG00000085365	SCAMP1			-0.259952	0.0131745	0.240216	0.0203259	5.23974e-05	0	0	1	0
circ246	circATRNL1_11	chr10	115469329	115120185	+	ENSG00000107518	ATRNL1	down	down_turquoise	down	hsa.miR.130b.5p	up	-0.286115	0.00706556	ENSG00000137656	BUD13			-0.310687	0.00384425	0.252285	0.0156482	5.24031e-05	0	0	1	0
circ246	circATRNL1_11	chr10	115469329	115120185	+	ENSG00000107518	ATRNL1	down	down_turquoise	down	hsa.miR.107	up	-0.399377	0.00023242	ENSG00000113643	RARS			-0.237844	0.0214847	0.162194	0.0851926	5.24433e-05	0	0	1	0
circ5511	circARID1A	chr1	26732792	26729651	+	ENSG00000117713	ARID1A	up		up	hsa.miR.204.3p	down	-0.37186	0.000599038	ENSG00000170571	EMB			-0.329168	0.0023202	0.0602033	0.306443	5.24986e-05	0	0	0	1
circ246	circATRNL1_11	chr10	115469329	115120185	+	ENSG00000107518	ATRNL1	down	down_turquoise	down	hsa.miR.363.3p	up	-0.222003	0.0295342	ENSG00000136895	GARNL3	1		-0.402474	0.000230882	0.181138	0.062558	5.25692e-05	0	1	1	0
circ27587	circDDX3Y	chrY	12913062	12909360	+	ENSG00000067048	DDX3Y	down		down	hsa.miR.148a.3p	up	-0.340794	0.00158703	ENSG00000134987	WDR36			-0.224718	0.0279782	0.273506	0.00960752	5.25711e-05	0	0	1	0
circ246	circATRNL1_11	chr10	115469329	115120185	+	ENSG00000107518	ATRNL1	down	down_turquoise	down	hsa.miR.107	up	-0.399377	0.00023242	ENSG00000115464	USP34			-0.225472	0.0276481	0.177467	0.0665415	5.26785e-05	0	0	1	0
circ206	circATRNL1_6	chr10	115268444	115120185	+	ENSG00000107518	ATRNL1	down		down	hsa.miR.363.3p	up	-0.317642	0.00308697	ENSG00000132549	VPS13B			-0.35564	0.00106861	0.133694	0.129737	5.27191e-05	1	0	1	0
circ206	circATRNL1_6	chr10	115268444	115120185	+	ENSG00000107518	ATRNL1	down		down	hsa.miR.363.3p	up	-0.317642	0.00308697	ENSG00000144747	TMF1			-0.357152	0.00102037	0.130078	0.136349	5.28815e-05	0	0	0	1
circ206	circATRNL1_6	chr10	115268444	115120185	+	ENSG00000107518	ATRNL1	down		down	hsa.let.7g.3p	up	-0.414378	0.000133887	ENSG00000139625	MAP3K12			-0.260367	0.0131872	0.0825045	0.243861	5.29974e-05	0	0	1	0
circ206	circATRNL1_6	chr10	115268444	115120185	+	ENSG00000107518	ATRNL1	down		down	hsa.miR.363.3p	up	-0.317642	0.00308697	ENSG00000151553	FAM160B1			-0.346477	0.00140754	0.152134	0.0994152	5.31479e-05	0	0	1	0
circ206	circATRNL1_6	chr10	115268444	115120185	+	ENSG00000107518	ATRNL1	down		down	hsa.let.7g.3p	up	-0.414378	0.000133887	ENSG00000165813	CCDC186			-0.24929	0.0168444	0.103501	0.19177	5.32045e-05	0	0	0	1
circ21473	circATG5	chr6	106248150	106308491	-	ENSG00000057663	ATG5	down	down_turquoise	down	hsa.miR.450b.5p	up	-0.202514	0.0428739	ENSG00000166147	FBN1			-0.381896	0.000464715	0.236912	0.0217922	5.33873e-05	1	0	1	0
circ206	circATRNL1_6	chr10	115268444	115120185	+	ENSG00000107518	ATRNL1	down		down	hsa.let.7g.3p	up	-0.414378	0.000133887	ENSG00000152932	RAB3C			-0.252777	0.0156109	0.0966424	0.208004	5.3447e-05	0	0	1	0
circ206	circATRNL1_6	chr10	115268444	115120185	+	ENSG00000107518	ATRNL1	down		down	hsa.miR.363.3p	up	-0.317642	0.00308697	ENSG00000100664	EIF5			-0.317814	0.003175	0.200642	0.0443726	5.34635e-05	0	0	1	0
circ15905	circNRXN1_3	chr2	50472298	50620183	-	ENSG00000179915	NRXN1	down		down	hsa.miR.629.5p	up	-0.30334	0.0045432	ENSG00000145555	MYO10			-0.324571	0.00263791	0.211306	0.0363616	5.35573e-05	0	0	1	0
circ246	circATRNL1_11	chr10	115469329	115120185	+	ENSG00000107518	ATRNL1	down	down_turquoise	down	hsa.miR.107	up	-0.399377	0.00023242	ENSG00000114098	ARMC8			-0.253887	0.0152343	0.137373	0.123236	5.36187e-05	0	0	1	0
circ246	circATRNL1_11	chr10	115469329	115120185	+	ENSG00000107518	ATRNL1	down	down_turquoise	down	hsa.miR.107	up	-0.399377	0.00023242	ENSG00000111802	TDP2			-0.222726	0.0291962	0.179457	0.0643592	5.36593e-05	0	0	1	0
circ206	circATRNL1_6	chr10	115268444	115120185	+	ENSG00000107518	ATRNL1	down		down	hsa.miR.363.3p	up	-0.317642	0.00308697	ENSG00000168702	LRP1B			-0.358478	0.000979671	0.125604	0.144837	5.37976e-05	0	0	0	1
circ5511	circARID1A	chr1	26732792	26729651	+	ENSG00000117713	ARID1A	up		up	hsa.miR.204.3p	down	-0.37186	0.000599038	ENSG00000079246	XRCC5			-0.269777	0.0106329	0.17529	0.0689922	5.39508e-05	0	0	0	1
circ5511	circARID1A	chr1	26732792	26729651	+	ENSG00000117713	ARID1A	up		up	hsa.miR.204.3p	down	-0.37186	0.000599038	ENSG00000102780	DGKH			-0.319388	0.00304195	0.0823091	0.244379	5.4579e-05	0	0	0	1
circ217	circATRNL1_9	chr10	115315736	115120185	+	ENSG00000107518	ATRNL1	down	down_turquoise	down	hsa.miR.130b.5p	up	-0.298159	0.00520265	ENSG00000144290	SLC4A10			-0.330557	0.00223119	0.208293	0.0384975	5.47465e-05	1	0	0	0
circ246	circATRNL1_11	chr10	115469329	115120185	+	ENSG00000107518	ATRNL1	down	down_turquoise	down	hsa.miR.148a.3p	up	-0.358576	0.000919439	ENSG00000205060	SLC35B4	1		-0.265984	0.0114685	0.202766	0.0426751	5.50786e-05	0	1	1	0
circ217	circATRNL1_9	chr10	115315736	115120185	+	ENSG00000107518	ATRNL1	down	down_turquoise	down	hsa.miR.130b.5p	up	-0.298159	0.00520265	ENSG00000112425	EPM2A			-0.355918	0.0010596	0.164883	0.081658	5.50962e-05	0	0	0	1
circ246	circATRNL1_11	chr10	115469329	115120185	+	ENSG00000107518	ATRNL1	down	down_turquoise	down	hsa.miR.107	up	-0.399377	0.00023242	ENSG00000128683	GAD1			-0.249044	0.0169348	0.142587	0.114411	5.51135e-05	1	0	1	0
circ246	circATRNL1_11	chr10	115469329	115120185	+	ENSG00000107518	ATRNL1	down	down_turquoise	down	hsa.miR.107	up	-0.399377	0.00023242	ENSG00000102024	PLS3			-0.248241	0.0172312	0.143729	0.112539	5.51548e-05	0	0	1	0
circ217	circATRNL1_9	chr10	115315736	115120185	+	ENSG00000107518	ATRNL1	down	down_turquoise	down	hsa.miR.130b.5p	up	-0.298159	0.00520265	ENSG00000001631	KRIT1			-0.367241	0.000745644	0.141502	0.116211	5.51671e-05	0	0	1	0
circ206	circATRNL1_6	chr10	115268444	115120185	+	ENSG00000107518	ATRNL1	down		down	hsa.miR.363.3p	up	-0.317642	0.00308697	ENSG00000204120	GIGYF2			-0.331204	0.00219071	0.177136	0.0669091	5.53445e-05	1	0	1	0
circ206	circATRNL1_6	chr10	115268444	115120185	+	ENSG00000107518	ATRNL1	down		down	hsa.let.7g.3p	up	-0.414378	0.000133887	ENSG00000124702	KLHDC3	1		-0.216463	0.0329932	0.149827	0.102903	5.55661e-05	0	1	1	0
circ27587	circDDX3Y	chrY	12913062	12909360	+	ENSG00000067048	DDX3Y	down		down	hsa.miR.148a.3p	up	-0.340794	0.00158703	ENSG00000138078	PREPL	1		-0.25662	0.0142056	0.240298	0.0202909	5.58745e-05	0	1	1	0
circ27587	circDDX3Y	chrY	12913062	12909360	+	ENSG00000067048	DDX3Y	down		down	hsa.miR.148a.3p	up	-0.340794	0.00158703	ENSG00000164209	SLC25A46			-0.255154	0.0146803	0.241729	0.0196824	5.59925e-05	0	0	0	1
circ246	circATRNL1_11	chr10	115469329	115120185	+	ENSG00000107518	ATRNL1	down	down_turquoise	down	hsa.miR.107	up	-0.399377	0.00023242	ENSG00000134265	NAPG	1		-0.241238	0.0200095	0.152522	0.098837	5.61086e-05	0	1	1	0
circ217	circATRNL1_9	chr10	115315736	115120185	+	ENSG00000107518	ATRNL1	down	down_turquoise	down	hsa.miR.130b.5p	up	-0.298159	0.00520265	ENSG00000141384	TAF4B			-0.379551	0.000501933	0.110397	0.176238	5.61697e-05	0	0	0	1
circ500	circSUV39H2	chr10	14897517	14896846	+	ENSG00000152457	DCLRE1C		down_turquoise	down	hsa.miR.450b.5p	up	-0.233641	0.0233285	ENSG00000138760	SCARB2			-0.432247	7.76604e-05	0.0785786	0.254367	5.62346e-05	0	0	1	0
circ206	circATRNL1_6	chr10	115268444	115120185	+	ENSG00000107518	ATRNL1	down		down	hsa.let.7g.3p	up	-0.414378	0.000133887	ENSG00000163818	LZTFL1			-0.214396	0.0343309	0.151261	0.100725	5.64626e-05	0	0	0	1
circ206	circATRNL1_6	chr10	115268444	115120185	+	ENSG00000107518	ATRNL1	down		down	hsa.miR.363.3p	up	-0.317642	0.00308697	ENSG00000060982	BCAT1			-0.326206	0.00252073	0.184073	0.059507	5.64701e-05	0	0	1	0
circ206	circATRNL1_6	chr10	115268444	115120185	+	ENSG00000107518	ATRNL1	down		down	hsa.miR.363.3p	up	-0.317642	0.00308697	ENSG00000198205	ZXDA			-0.327286	0.0024459	0.182264	0.0613731	5.65068e-05	0	0	1	0
circ206	circATRNL1_6	chr10	115268444	115120185	+	ENSG00000107518	ATRNL1	down		down	hsa.miR.363.3p	up	-0.317642	0.00308697	ENSG00000189308	LIN54	1		-0.349624	0.00128158	0.140833	0.11733	5.65903e-05	0	1	1	0
circ206	circATRNL1_6	chr10	115268444	115120185	+	ENSG00000107518	ATRNL1	down		down	hsa.miR.363.3p	up	-0.317642	0.00308697	ENSG00000144848	ATG3			-0.319511	0.00303173	0.194407	0.0496649	5.6657e-05	0	0	1	0
circ27587	circDDX3Y	chrY	12913062	12909360	+	ENSG00000067048	DDX3Y	down		down	hsa.miR.148a.3p	up	-0.340794	0.00158703	ENSG00000196305	IARS			-0.241548	0.0197586	0.254502	0.0148959	5.69005e-05	0	0	1	0
circ27587	circDDX3Y	chrY	12913062	12909360	+	ENSG00000067048	DDX3Y	down		down	hsa.miR.148a.3p	up	-0.340794	0.00158703	ENSG00000052802	MSMO1			-0.284218	0.00740626	0.206569	0.0397641	5.69311e-05	0	0	1	0
circ206	circATRNL1_6	chr10	115268444	115120185	+	ENSG00000107518	ATRNL1	down		down	hsa.let.7g.3p	up	-0.414378	0.000133887	ENSG00000152332	UHMK1			-0.224762	0.0280416	0.136266	0.125168	5.72017e-05	0	0	1	0
circ246	circATRNL1_11	chr10	115469329	115120185	+	ENSG00000107518	ATRNL1	down	down_turquoise	down	hsa.miR.107	up	-0.399377	0.00023242	ENSG00000111731	C2CD5	1		-0.225657	0.0275462	0.171466	0.0734619	5.72432e-05	0	1	1	0
circ206	circATRNL1_6	chr10	115268444	115120185	+	ENSG00000107518	ATRNL1	down		down	hsa.let.7g.3p	up	-0.414378	0.000133887	ENSG00000166326	TRIM44			-0.251388	0.0160927	0.0923714	0.218502	5.7292e-05	0	0	1	0
circ3279	circFAT3	chr11	92355404	92352096	+	ENSG00000165323	FAT3	down	down_turquoise	down	hsa.miR.708.5p	up	-0.276348	0.00911154	ENSG00000026508	CD44			-0.413921	0.000153569	0.0500757	0.336977	5.73697e-05	1	0	1	0
circ5511	circARID1A	chr1	26732792	26729651	+	ENSG00000117713	ARID1A	up		up	hsa.miR.204.3p	down	-0.37186	0.000599038	ENSG00000118007	STAG1			-0.312446	0.00366849	0.0935684	0.21553	5.75949e-05	1	0	0	0
circ246	circATRNL1_11	chr10	115469329	115120185	+	ENSG00000107518	ATRNL1	down	down_turquoise	down	hsa.miR.363.3p	up	-0.222003	0.0295342	ENSG00000104427	ZC2HC1A			-0.412131	0.000163825	0.153093	0.0979908	5.76461e-05	0	0	1	0
circ246	circATRNL1_11	chr10	115469329	115120185	+	ENSG00000107518	ATRNL1	down	down_turquoise	down	hsa.miR.708.5p	up	-0.280353	0.00814435	ENSG00000149289	ZC3H12C			-0.383099	0.000446608	0.133144	0.130728	5.77923e-05	0	0	1	0
circ15905	circNRXN1_3	chr2	50472298	50620183	-	ENSG00000179915	NRXN1	down		down	hsa.miR.629.5p	up	-0.30334	0.0045432	ENSG00000180573	HIST1H2AC			-0.387295	0.000388377	0.0729454	0.269837	5.78578e-05	0	0	1	0
circ246	circATRNL1_11	chr10	115469329	115120185	+	ENSG00000107518	ATRNL1	down	down_turquoise	down	hsa.miR.107	up	-0.399377	0.00023242	ENSG00000134987	WDR36			-0.238338	0.0212647	0.154172	0.0964041	5.78939e-05	0	0	1	0
circ206	circATRNL1_6	chr10	115268444	115120185	+	ENSG00000107518	ATRNL1	down		down	hsa.let.7g.3p	up	-0.414378	0.000133887	ENSG00000171150	SOCS5			-0.231766	0.0243525	0.124809	0.146381	5.79798e-05	0	0	0	1
circ5511	circARID1A	chr1	26732792	26729651	+	ENSG00000117713	ARID1A	up		up	hsa.miR.204.3p	down	-0.37186	0.000599038	ENSG00000132716	DCAF8	1		-0.321239	0.00289176	0.0706686	0.276218	5.81082e-05	0	0	0	1
circ246	circATRNL1_11	chr10	115469329	115120185	+	ENSG00000107518	ATRNL1	down	down_turquoise	down	hsa.miR.107	up	-0.399377	0.00023242	ENSG00000177565	TBL1XR1			-0.244354	0.0187303	0.145117	0.110292	5.82829e-05	1	0	1	0
circ246	circATRNL1_11	chr10	115469329	115120185	+	ENSG00000107518	ATRNL1	down	down_turquoise	down	hsa.miR.107	up	-0.399377	0.00023242	ENSG00000014641	MDH1			-0.222788	0.0291607	0.173672	0.0708579	5.82942e-05	0	0	1	0
circ246	circATRNL1_11	chr10	115469329	115120185	+	ENSG00000107518	ATRNL1	down	down_turquoise	down	hsa.miR.148a.3p	up	-0.358576	0.000919439	ENSG00000276966	HIST1H4E			-0.2606	0.0129815	0.205712	0.0404056	5.85088e-05	0	0	0	1
circ217	circATRNL1_9	chr10	115315736	115120185	+	ENSG00000107518	ATRNL1	down	down_turquoise	down	hsa.miR.130b.5p	up	-0.298159	0.00520265	ENSG00000205133	TRIQK			-0.350241	0.0012581	0.171084	0.0739192	5.86745e-05	0	0	0	1
circ27587	circDDX3Y	chrY	12913062	12909360	+	ENSG00000067048	DDX3Y	down		down	hsa.chr5.14497.s	up	-0.242594	0.0193225	ENSG00000157107	FCHO2			-0.371023	0.000615756	0.2053	0.0407174	5.87398e-05	0	0	0	1
circ246	circATRNL1_11	chr10	115469329	115120185	+	ENSG00000107518	ATRNL1	down	down_turquoise	down	hsa.miR.107	up	-0.399377	0.00023242	ENSG00000092148	HECTD1			-0.233432	0.0235366	0.159572	0.0887474	5.88485e-05	0	0	1	0
circ217	circATRNL1_9	chr10	115315736	115120185	+	ENSG00000107518	ATRNL1	down	down_turquoise	down	hsa.miR.130b.5p	up	-0.298159	0.00520265	ENSG00000181915	ADO			-0.360453	0.0009218	0.15086	0.10133	5.88987e-05	0	0	1	0
circ246	circATRNL1_11	chr10	115469329	115120185	+	ENSG00000107518	ATRNL1	down	down_turquoise	down	hsa.miR.107	up	-0.399377	0.00023242	ENSG00000151348	EXT2			-0.233031	0.0237309	0.160019	0.0881335	5.89142e-05	0	0	1	0
circ27587	circDDX3Y	chrY	12913062	12909360	+	ENSG00000067048	DDX3Y	down		down	hsa.miR.148a.3p	up	-0.340794	0.00158703	ENSG00000123178	SPRYD7			-0.254414	0.0149251	0.239744	0.0205301	5.89338e-05	0	0	1	0
circ27587	circDDX3Y	chrY	12913062	12909360	+	ENSG00000067048	DDX3Y	down		down	hsa.chr5.14497.s	up	-0.242594	0.0193225	ENSG00000186001	LRCH3			-0.370699	0.000622341	0.205544	0.0405327	5.90525e-05	0	0	0	1
circ27587	circDDX3Y	chrY	12913062	12909360	+	ENSG00000067048	DDX3Y	down		down	hsa.miR.148a.3p	up	-0.340794	0.00158703	ENSG00000139505	MTMR6			-0.239188	0.0207732	0.254795	0.0147988	5.91021e-05	0	0	1	0
circ246	circATRNL1_11	chr10	115469329	115120185	+	ENSG00000107518	ATRNL1	down	down_turquoise	down	hsa.miR.107	up	-0.399377	0.00023242	ENSG00000171365	CLCN5			-0.241176	0.0200355	0.148542	0.104883	5.91573e-05	0	0	1	0
circ246	circATRNL1_11	chr10	115469329	115120185	+	ENSG00000107518	ATRNL1	down	down_turquoise	down	hsa.miR.107	up	-0.399377	0.00023242	ENSG00000163170	BOLA3			-0.214859	0.0340276	0.181848	0.0618095	5.92025e-05	0	0	1	0
circ219	circATRNL1_10	chr10	115315736	115215697	+	ENSG00000107518	ATRNL1		down_turquoise	down	hsa.miR.708.5p	up	-0.199181	0.0455711	ENSG00000116044	NFE2L2			-0.404387	0.000215877	0.194272	0.0497844	5.93011e-05	0	0	1	0
circ206	circATRNL1_6	chr10	115268444	115120185	+	ENSG00000107518	ATRNL1	down		down	hsa.miR.363.3p	up	-0.317642	0.00308697	ENSG00000183665	TRMT12			-0.367179	0.000747098	0.0947875	0.212527	5.93408e-05	0	0	1	0
circ246	circATRNL1_11	chr10	115469329	115120185	+	ENSG00000107518	ATRNL1	down	down_turquoise	down	hsa.miR.130b.5p	up	-0.286115	0.00706556	ENSG00000115760	BIRC6			-0.388282	0.000375723	0.106597	0.184697	5.93589e-05	1	0	1	0
circ206	circATRNL1_6	chr10	115268444	115120185	+	ENSG00000107518	ATRNL1	down		down	hsa.let.7g.3p	up	-0.414378	0.000133887	ENSG00000113163	COL4A3BP			-0.241762	0.0197892	0.10626	0.18546	5.94713e-05	0	0	0	1
circ217	circATRNL1_9	chr10	115315736	115120185	+	ENSG00000107518	ATRNL1	down	down_turquoise	down	hsa.miR.130b.5p	up	-0.298159	0.00520265	ENSG00000011295	TTC19	1		-0.363692	0.000833511	0.143056	0.11364	5.96205e-05	0	1	0	0
circ27587	circDDX3Y	chrY	12913062	12909360	+	ENSG00000067048	DDX3Y	down		down	hsa.miR.148a.3p	up	-0.340794	0.00158703	ENSG00000164405	UQCRQ			-0.262451	0.0124433	0.230177	0.0250514	5.98225e-05	0	0	1	0
circ246	circATRNL1_11	chr10	115469329	115120185	+	ENSG00000107518	ATRNL1	down	down_turquoise	down	hsa.miR.107	up	-0.399377	0.00023242	ENSG00000155868	MED7			-0.246113	0.0180392	0.140427	0.118011	5.983e-05	0	0	1	0
circ217	circATRNL1_9	chr10	115315736	115120185	+	ENSG00000107518	ATRNL1	down	down_turquoise	down	hsa.miR.130b.5p	up	-0.298159	0.00520265	ENSG00000092148	HECTD1			-0.346353	0.00141269	0.176687	0.0674118	5.99015e-05	0	0	1	0
circ15905	circNRXN1_3	chr2	50472298	50620183	-	ENSG00000179915	NRXN1	down		down	hsa.miR.629.5p	up	-0.30334	0.0045432	ENSG00000112715	VEGFA			-0.360761	0.000913041	0.139538	0.119516	5.99339e-05	0	0	1	0
circ206	circATRNL1_6	chr10	115268444	115120185	+	ENSG00000107518	ATRNL1	down		down	hsa.miR.363.3p	up	-0.317642	0.00308697	ENSG00000111707	SUDS3			-0.340368	0.00168418	0.154784	0.0955142	6.00196e-05	0	0	1	0
circ27587	circDDX3Y	chrY	12913062	12909360	+	ENSG00000067048	DDX3Y	down		down	hsa.chr5.14497.s	up	-0.242594	0.0193225	ENSG00000115760	BIRC6			-0.354069	0.001059	0.231691	0.0242863	6.00592e-05	1	0	0	0
circ206	circATRNL1_6	chr10	115268444	115120185	+	ENSG00000107518	ATRNL1	down		down	hsa.miR.363.3p	up	-0.317642	0.00308697	ENSG00000213096	ZNF254			-0.362551	0.00086371	0.105403	0.187407	6.03453e-05	0	0	1	0
circ246	circATRNL1_11	chr10	115469329	115120185	+	ENSG00000107518	ATRNL1	down	down_turquoise	down	hsa.miR.107	up	-0.399377	0.00023242	ENSG00000109680	TBC1D19			-0.247871	0.0173695	0.137018	0.123853	6.03792e-05	0	0	1	0
circ246	circATRNL1_11	chr10	115469329	115120185	+	ENSG00000107518	ATRNL1	down	down_turquoise	down	hsa.miR.107	up	-0.399377	0.00023242	ENSG00000163655	GMPS			-0.217296	0.0324662	0.177698	0.0662849	6.03978e-05	0	0	1	0
circ246	circATRNL1_11	chr10	115469329	115120185	+	ENSG00000107518	ATRNL1	down	down_turquoise	down	hsa.miR.107	up	-0.399377	0.00023242	ENSG00000125304	TM9SF2			-0.233401	0.0235515	0.157443	0.0917116	6.05916e-05	0	0	1	0
circ5511	circARID1A	chr1	26732792	26729651	+	ENSG00000117713	ARID1A	up		up	hsa.miR.204.3p	down	-0.37186	0.000599038	ENSG00000166526	ZNF3			-0.287301	0.00699107	0.13932	0.119887	6.05981e-05	0	0	0	1
circ5511	circARID1A	chr1	26732792	26729651	+	ENSG00000117713	ARID1A	up		up	hsa.miR.204.3p	down	-0.37186	0.000599038	ENSG00000113580	NR3C1			-0.30896	0.00402411	0.096284	0.208873	6.07487e-05	0	0	0	1
circ27587	circDDX3Y	chrY	12913062	12909360	+	ENSG00000067048	DDX3Y	down		down	hsa.miR.148a.3p	up	-0.340794	0.00158703	ENSG00000106537	TSPAN13			-0.237306	0.0216128	0.255136	0.0146862	6.07731e-05	0	0	1	0
circ17709	circSLC4A7_1	chr3	27379249	27424152	-	ENSG00000033867	SLC4A7	down		down	hsa.miR.708.5p	up	-0.197115	0.0473089	ENSG00000116044	NFE2L2			-0.404387	0.000215877	0.194662	0.0494392	6.0897e-05	0	0	1	0
circ217	circATRNL1_9	chr10	115315736	115120185	+	ENSG00000107518	ATRNL1	down	down_turquoise	down	hsa.miR.130b.5p	up	-0.298159	0.00520265	ENSG00000198825	INPP5F	1		-0.334444	0.00199792	0.195437	0.0487583	6.10966e-05	0	1	1	0
circ27587	circDDX3Y	chrY	12913062	12909360	+	ENSG00000067048	DDX3Y	down		down	hsa.miR.148a.3p	up	-0.340794	0.00158703	ENSG00000186908	ZDHHC17			-0.229284	0.0255123	0.261954	0.012586	6.13881e-05	0	0	1	0
circ4215	circERC1_6	chr12	1444750	1371833	+	ENSG00000082805	ERC1	down	down_turquoise	down	hsa.miR.708.5p	up	-0.202011	0.0432722	ENSG00000153904	DDAH1			-0.45622	3.0089e-05	0.0323491	0.39293	6.15988e-05	0	0	1	0
circ206	circATRNL1_6	chr10	115268444	115120185	+	ENSG00000107518	ATRNL1	down		down	hsa.miR.363.3p	up	-0.317642	0.00308697	ENSG00000146463	ZMYM4			-0.344687	0.00148401	0.144137	0.111874	6.16939e-05	0	0	1	0
circ217	circATRNL1_9	chr10	115315736	115120185	+	ENSG00000107518	ATRNL1	down	down_turquoise	down	hsa.miR.130b.5p	up	-0.298159	0.00520265	ENSG00000183023	SLC8A1	1		-0.318647	0.00310393	0.218332	0.0317487	6.1714e-05	0	1	1	0
circ206	circATRNL1_6	chr10	115268444	115120185	+	ENSG00000107518	ATRNL1	down		down	hsa.let.7g.3p	up	-0.414378	0.000133887	ENSG00000078725	BRINP1			-0.246976	0.0177075	0.0930885	0.216719	6.18292e-05	1	0	0	0
circ206	circATRNL1_6	chr10	115268444	115120185	+	ENSG00000107518	ATRNL1	down		down	hsa.miR.363.3p	up	-0.317642	0.00308697	ENSG00000150995	ITPR1	1		-0.371282	0.000655831	0.0785142	0.254541	6.19894e-05	1	1	1	0
circ27587	circDDX3Y	chrY	12913062	12909360	+	ENSG00000067048	DDX3Y	down		down	hsa.miR.148a.3p	up	-0.340794	0.00158703	ENSG00000077254	USP33	1		-0.251282	0.0159989	0.240265	0.0203049	6.20135e-05	0	1	1	0
circ246	circATRNL1_11	chr10	115469329	115120185	+	ENSG00000107518	ATRNL1	down	down_turquoise	down	hsa.miR.107	up	-0.399377	0.00023242	ENSG00000196072	BLOC1S2			-0.22143	0.029951	0.170941	0.0740914	6.20355e-05	0	0	1	0
circ5511	circARID1A	chr1	26732792	26729651	+	ENSG00000117713	ARID1A	up		up	hsa.miR.204.3p	down	-0.37186	0.000599038	ENSG00000197713	RPE			-0.328613	0.00235668	0.0403843	0.367219	6.23133e-05	0	0	0	1
circ246	circATRNL1_11	chr10	115469329	115120185	+	ENSG00000107518	ATRNL1	down	down_turquoise	down	hsa.miR.130b.5p	up	-0.286115	0.00706556	ENSG00000171204	TMEM126B			-0.376034	0.00056286	0.133285	0.130473	6.23618e-05	0	0	0	1
circ17709	circSLC4A7_1	chr3	27379249	27424152	-	ENSG00000033867	SLC4A7	down		down	hsa.miR.629.5p	up	-0.197751	0.0467681	ENSG00000157184	CPT2			-0.393157	0.000318583	0.213462	0.0348924	6.24663e-05	0	0	1	0
circ246	circATRNL1_11	chr10	115469329	115120185	+	ENSG00000107518	ATRNL1	down	down_turquoise	down	hsa.miR.363.3p	up	-0.222003	0.0295342	ENSG00000183475	ASB7			-0.411823	0.000165656	0.147493	0.10652	6.2599e-05	0	0	1	0
circ206	circATRNL1_6	chr10	115268444	115120185	+	ENSG00000107518	ATRNL1	down		down	hsa.miR.363.3p	up	-0.317642	0.00308697	ENSG00000152503	TRIM36			-0.373103	0.000618681	0.0717959	0.273049	6.26342e-05	0	0	1	0
circ206	circATRNL1_6	chr10	115268444	115120185	+	ENSG00000107518	ATRNL1	down		down	hsa.miR.148a.3p	up	-0.332569	0.00202179	ENSG00000276966	HIST1H4E			-0.2606	0.0129815	0.241247	0.0198855	6.26789e-05	0	0	0	1
circ206	circATRNL1_6	chr10	115268444	115120185	+	ENSG00000107518	ATRNL1	down		down	hsa.miR.363.3p	up	-0.317642	0.00308697	ENSG00000173875	ZNF791			-0.3524	0.00117895	0.126337	0.143423	6.26855e-05	0	0	0	1
circ206	circATRNL1_6	chr10	115268444	115120185	+	ENSG00000107518	ATRNL1	down		down	hsa.miR.363.3p	up	-0.317642	0.00308697	ENSG00000138757	G3BP2			-0.321548	0.00286738	0.184338	0.0592372	6.29329e-05	0	0	1	0
circ206	circATRNL1_6	chr10	115268444	115120185	+	ENSG00000107518	ATRNL1	down		down	hsa.miR.363.3p	up	-0.317642	0.00308697	ENSG00000155511	GRIA1			-0.336295	0.0018947	0.158634	0.0900447	6.31755e-05	1	0	0	0
circ246	circATRNL1_11	chr10	115469329	115120185	+	ENSG00000107518	ATRNL1	down	down_turquoise	down	hsa.miR.107	up	-0.399377	0.00023242	ENSG00000115419	GLS			-0.237782	0.0215123	0.148233	0.105363	6.31903e-05	0	0	1	0
circ27587	circDDX3Y	chrY	12913062	12909360	+	ENSG00000067048	DDX3Y	down		down	hsa.miR.148a.3p	up	-0.340794	0.00158703	ENSG00000109184	DCUN1D4	1		-0.26384	0.0120521	0.225492	0.0275472	6.32003e-05	0	1	1	0
circ246	circATRNL1_11	chr10	115469329	115120185	+	ENSG00000107518	ATRNL1	down	down_turquoise	down	hsa.miR.107	up	-0.399377	0.00023242	ENSG00000176623	RMDN1			-0.195113	0.0490312	0.198323	0.0462864	6.32603e-05	0	0	1	0
circ206	circATRNL1_6	chr10	115268444	115120185	+	ENSG00000107518	ATRNL1	down		down	hsa.miR.363.3p	up	-0.317642	0.00308697	ENSG00000198046	ZNF667			-0.342373	0.00158842	0.146819	0.107581	6.32647e-05	0	0	0	1
circ27587	circDDX3Y	chrY	12913062	12909360	+	ENSG00000067048	DDX3Y	down		down	hsa.miR.148a.3p	up	-0.340794	0.00158703	ENSG00000065150	IPO5			-0.233418	0.0234361	0.256666	0.014191	6.32966e-05	0	0	1	0
circ206	circATRNL1_6	chr10	115268444	115120185	+	ENSG00000107518	ATRNL1	down		down	hsa.miR.363.3p	up	-0.317642	0.00308697	ENSG00000196652	ZKSCAN5			-0.321733	0.00285284	0.18348	0.0601135	6.34614e-05	0	0	1	0
circ246	circATRNL1_11	chr10	115469329	115120185	+	ENSG00000107518	ATRNL1	down	down_turquoise	down	hsa.miR.130b.5p	up	-0.286115	0.00706556	ENSG00000132294	EFR3A			-0.367518	0.000739135	0.150825	0.101384	6.34685e-05	1	0	1	0
circ206	circATRNL1_6	chr10	115268444	115120185	+	ENSG00000107518	ATRNL1	down		down	hsa.let.7g.3p	up	-0.414378	0.000133887	ENSG00000139726	DENR			-0.217296	0.0324662	0.137965	0.122211	6.36527e-05	1	0	0	0
circ246	circATRNL1_11	chr10	115469329	115120185	+	ENSG00000107518	ATRNL1	down	down_turquoise	down	hsa.miR.107	up	-0.399377	0.00023242	ENSG00000085382	HACE1			-0.24096	0.0201269	0.142849	0.113979	6.38565e-05	0	0	1	0
circ500	circSUV39H2	chr10	14897517	14896846	+	ENSG00000152457	DCLRE1C		down_turquoise	down	hsa.miR.450b.5p	up	-0.233641	0.0233285	ENSG00000109458	GAB1			-0.432803	7.60289e-05	0.0620281	0.301071	6.39407e-05	0	0	1	0
circ7886	circVRK1	chr14	96860735	96833467	+	ENSG00000100749	VRK1		down_turquoise	down	hsa.miR.450b.5p	up	-0.273195	0.00967881	ENSG00000173848	NET1	1		-0.36758	0.000737695	0.170185	0.0750058	6.41026e-05	0	1	1	0
circ5511	circARID1A	chr1	26732792	26729651	+	ENSG00000117713	ARID1A	up		up	hsa.miR.204.3p	down	-0.37186	0.000599038	ENSG00000137414	FAM8A1			-0.290109	0.00652204	0.129617	0.137207	6.41565e-05	0	0	0	1
circ246	circATRNL1_11	chr10	115469329	115120185	+	ENSG00000107518	ATRNL1	down	down_turquoise	down	hsa.miR.107	up	-0.399377	0.00023242	ENSG00000077097	TOP2B	1		-0.212051	0.0359009	0.179503	0.0643091	6.42129e-05	0	0	1	0
circ206	circATRNL1_6	chr10	115268444	115120185	+	ENSG00000107518	ATRNL1	down		down	hsa.miR.363.3p	up	-0.317642	0.00308697	ENSG00000104643	MTMR9			-0.345057	0.00146789	0.140085	0.11859	6.42932e-05	0	0	1	0
circ27587	circDDX3Y	chrY	12913062	12909360	+	ENSG00000067048	DDX3Y	down		down	hsa.miR.148a.3p	up	-0.340794	0.00158703	ENSG00000111716	LDHB			-0.26023	0.0130915	0.228485	0.0259304	6.44362e-05	0	0	1	0
circ8229	circMGA_1	chr15	41669958	41668828	+	ENSG00000174197	MGA		down_turquoise	down	hsa.miR.450b.5p	up	-0.221453	0.0298575	ENSG00000070214	SLC44A1			-0.436474	6.60154e-05	0.0715785	0.273659	6.45042e-05	0	0	1	0
circ246	circATRNL1_11	chr10	115469329	115120185	+	ENSG00000107518	ATRNL1	down	down_turquoise	down	hsa.miR.107	up	-0.399377	0.00023242	ENSG00000114686	MRPL3			-0.231396	0.0245369	0.155268	0.0948137	6.4641e-05	0	0	1	0
circ217	circATRNL1_9	chr10	115315736	115120185	+	ENSG00000107518	ATRNL1	down	down_turquoise	down	hsa.miR.130b.5p	up	-0.298159	0.00520265	ENSG00000115524	SF3B1			-0.375972	0.000563987	0.10677	0.184308	6.46504e-05	0	0	1	0
circ3279	circFAT3	chr11	92355404	92352096	+	ENSG00000165323	FAT3	down	down_turquoise	down	hsa.miR.708.5p	up	-0.276348	0.00911154	ENSG00000055070	SZRD1			-0.255985	0.0145439	0.307366	0.0040825	6.46715e-05	0	0	1	0
circ8229	circMGA_1	chr15	41669958	41668828	+	ENSG00000174197	MGA		down_turquoise	down	hsa.miR.450b.5p	up	-0.221453	0.0298575	ENSG00000109458	GAB1			-0.432803	7.60289e-05	0.0844805	0.238661	6.47512e-05	0	0	1	0
circ206	circATRNL1_6	chr10	115268444	115120185	+	ENSG00000107518	ATRNL1	down		down	hsa.miR.363.3p	up	-0.317642	0.00308697	ENSG00000138246	DNAJC13			-0.315223	0.00340538	0.192209	0.0516436	6.48683e-05	0	0	1	0
circ7234	circNEMF_1	chr14	49795791	49831361	-	ENSG00000165525	NEMF		down_turquoise	down	hsa.miR.450b.5p	up	-0.228948	0.0256873	ENSG00000028528	SNX1			-0.399574	0.000255461	0.163995	0.0828132	6.4924e-05	0	0	1	0
circ19323	circGRK4	chr4	3029409	2984513	+	ENSG00000125388	GRK4	down		down	hsa.miR.450b.5p	up	-0.198287	0.046317	ENSG00000126803	HSPA2			-0.448291	4.14736e-05	0.0682647	0.283032	6.49507e-05	0	0	1	0
circ246	circATRNL1_11	chr10	115469329	115120185	+	ENSG00000107518	ATRNL1	down	down_turquoise	down	hsa.miR.107	up	-0.399377	0.00023242	ENSG00000187908	DMBT1			-0.228619	0.0259573	0.158538	0.0901777	6.49877e-05	0	0	1	0
circ217	circATRNL1_9	chr10	115315736	115120185	+	ENSG00000107518	ATRNL1	down	down_turquoise	down	hsa.miR.130b.5p	up	-0.298159	0.00520265	ENSG00000040341	STAU2	1		-0.347186	0.0013782	0.169319	0.0760635	6.51289e-05	0	1	1	0
circ202	circATRNL1_5	chr10	115241725	115120185	+	ENSG00000107518	ATRNL1	down		down	hsa.miR.363.3p	up	-0.209506	0.0376264	ENSG00000164338	UTP15			-0.397538	0.000274126	0.190869	0.0528797	6.51311e-05	0	0	1	0
circ5511	circARID1A	chr1	26732792	26729651	+	ENSG00000117713	ARID1A	up		up	hsa.miR.204.3p	down	-0.37186	0.000599038	ENSG00000132953	XPO4			-0.318493	0.00311698	0.0650627	0.29223	6.51549e-05	0	0	0	1
circ27587	circDDX3Y	chrY	12913062	12909360	+	ENSG00000067048	DDX3Y	down		down	hsa.miR.148a.3p	up	-0.340794	0.00158703	ENSG00000132872	SYT4			-0.274607	0.00935793	0.210734	0.0367596	6.5184e-05	0	0	1	0
circ500	circSUV39H2	chr10	14897517	14896846	+	ENSG00000152457	DCLRE1C		down_turquoise	down	hsa.miR.450b.5p	up	-0.233641	0.0233285	ENSG00000070214	SLC44A1			-0.436474	6.60154e-05	0.0444223	0.354508	6.51868e-05	0	0	1	0
circ16286	circZNF638_2	chr2	71427414	71426460	+	ENSG00000075292	ZNF638	down		down	hsa.miR.766.3p	up	-0.311524	0.00365004	ENSG00000143384	MCL1		1	-0.377854	0.000530537	0.0682574	0.283053	6.54124e-05	0	0	1	0
circ246	circATRNL1_11	chr10	115469329	115120185	+	ENSG00000107518	ATRNL1	down	down_turquoise	down	hsa.miR.130b.5p	up	-0.286115	0.00706556	ENSG00000085832	EPS15	1		-0.397877	0.000270931	0.0669819	0.286701	6.5485e-05	0	1	1	0
circ217	circATRNL1_9	chr10	115315736	115120185	+	ENSG00000107518	ATRNL1	down	down_turquoise	down	hsa.miR.130b.5p	up	-0.298159	0.00520265	ENSG00000188177	ZC3H6			-0.339134	0.00174565	0.182791	0.060825	6.58577e-05	0	0	0	1
circ206	circATRNL1_6	chr10	115268444	115120185	+	ENSG00000107518	ATRNL1	down		down	hsa.let.7g.3p	up	-0.414378	0.000133887	ENSG00000162377	COA7			-0.24457	0.0186443	0.0912335	0.221348	6.58703e-05	0	0	0	1
circ8229	circMGA_1	chr15	41669958	41668828	+	ENSG00000174197	MGA		down_turquoise	down	hsa.miR.450b.5p	up	-0.221453	0.0298575	ENSG00000174628	IQCK			-0.389979	0.00035485	0.191648	0.052159	6.58793e-05	0	0	1	0
circ206	circATRNL1_6	chr10	115268444	115120185	+	ENSG00000107518	ATRNL1	down		down	hsa.let.7g.3p	up	-0.414378	0.000133887	ENSG00000069956	MAPK6			-0.202487	0.042914	0.154254	0.0962854	6.59414e-05	0	0	1	0
circ217	circATRNL1_9	chr10	115315736	115120185	+	ENSG00000107518	ATRNL1	down	down_turquoise	down	hsa.miR.221.3p	up	-0.197542	0.0469456	ENSG00000148798	INA			-0.381093	0.000477155	0.230833	0.0247177	6.59897e-05	0	0	0	1
circ19323	circGRK4	chr4	3029409	2984513	+	ENSG00000125388	GRK4	down		down	hsa.miR.450b.5p	up	-0.198287	0.046317	ENSG00000065413	ANKRD44			-0.44644	4.46532e-05	0.0736255	0.267945	6.60394e-05	0	0	1	0
circ12207	circPPP4R1_1	chr18	9583117	9595102	-	ENSG00000154845	PPP4R1	up		up	hsa.miR.619.5p	down	-0.253819	0.0151241	ENSG00000148841	ITPRIP		1	-0.296742	0.00552115	0.288494	0.00665763	6.62225e-05	0	1	0	0
circ217	circATRNL1_9	chr10	115315736	115120185	+	ENSG00000107518	ATRNL1	down	down_turquoise	down	hsa.chr5.14497.s	up	-0.251479	0.0159295	ENSG00000115464	USP34			-0.376191	0.000518888	0.176816	0.0672667	6.623e-05	0	0	0	1
circ5511	circARID1A	chr1	26732792	26729651	+	ENSG00000117713	ARID1A	up		up	hsa.miR.204.3p	down	-0.37186	0.000599038	ENSG00000033178	UBA6			-0.312785	0.0036354	0.0781642	0.255489	6.62701e-05	1	0	0	0
circ27587	circDDX3Y	chrY	12913062	12909360	+	ENSG00000067048	DDX3Y	down		down	hsa.miR.148a.3p	up	-0.340794	0.00158703	ENSG00000040341	STAU2	1		-0.272309	0.00988511	0.21254	0.0355147	6.63495e-05	0	1	1	0
circ7234	circNEMF_1	chr14	49795791	49831361	-	ENSG00000165525	NEMF		down_turquoise	down	hsa.miR.450b.5p	up	-0.228948	0.0256873	ENSG00000166147	FBN1			-0.381896	0.000464715	0.197481	0.0469974	6.67504e-05	1	0	1	0
circ7886	circVRK1	chr14	96860735	96833467	+	ENSG00000100749	VRK1		down_turquoise	down	hsa.miR.450b.5p	up	-0.273195	0.00967881	ENSG00000120800	UTP20			-0.378965	0.000511652	0.143251	0.113321	6.67673e-05	0	0	1	0
circ246	circATRNL1_11	chr10	115469329	115120185	+	ENSG00000107518	ATRNL1	down	down_turquoise	down	hsa.miR.107	up	-0.399377	0.00023242	ENSG00000165899	OTOGL			-0.227169	0.0267255	0.158338	0.0904571	6.68391e-05	0	0	1	0
circ246	circATRNL1_11	chr10	115469329	115120185	+	ENSG00000107518	ATRNL1	down	down_turquoise	down	hsa.miR.363.3p	up	-0.222003	0.0295342	ENSG00000145439	CBR4			-0.407473	0.000193549	0.152661	0.0986306	6.70385e-05	0	0	1	0
circ246	circATRNL1_11	chr10	115469329	115120185	+	ENSG00000107518	ATRNL1	down	down_turquoise	down	hsa.miR.708.5p	up	-0.280353	0.00814435	ENSG00000163629	PTPN13		1	-0.377083	0.000544021	0.1346	0.128114	6.74348e-05	0	0	1	0
circ206	circATRNL1_6	chr10	115268444	115120185	+	ENSG00000107518	ATRNL1	down		down	hsa.miR.363.3p	up	-0.317642	0.00308697	ENSG00000171150	SOCS5			-0.350241	0.0012581	0.124809	0.146381	6.75245e-05	0	0	1	0
circ246	circATRNL1_11	chr10	115469329	115120185	+	ENSG00000107518	ATRNL1	down	down_turquoise	down	hsa.miR.107	up	-0.399377	0.00023242	ENSG00000164114	MAP9			-0.202332	0.0430354	0.186645	0.0569273	6.76177e-05	0	0	1	0
circ206	circATRNL1_6	chr10	115268444	115120185	+	ENSG00000107518	ATRNL1	down		down	hsa.miR.363.3p	up	-0.317642	0.00308697	ENSG00000066136	NFYC			-0.360083	0.000932409	0.10057	0.198611	6.78516e-05	0	0	1	0
circ246	circATRNL1_11	chr10	115469329	115120185	+	ENSG00000107518	ATRNL1	down	down_turquoise	down	hsa.miR.130b.5p	up	-0.286115	0.00706556	ENSG00000112425	EPM2A			-0.355918	0.0010596	0.168997	0.0764596	6.793e-05	0	0	0	1
circ206	circATRNL1_6	chr10	115268444	115120185	+	ENSG00000107518	ATRNL1	down		down	hsa.miR.363.3p	up	-0.317642	0.00308697	ENSG00000164933	SLC25A32			-0.343268	0.0015473	0.139149	0.120178	6.80954e-05	0	0	1	0
circ206	circATRNL1_6	chr10	115268444	115120185	+	ENSG00000107518	ATRNL1	down		down	hsa.miR.363.3p	up	-0.317642	0.00308697	ENSG00000065559	MAP2K4			-0.348081	0.001342	0.128784	0.138769	6.81834e-05	0	0	1	0
circ246	circATRNL1_11	chr10	115469329	115120185	+	ENSG00000107518	ATRNL1	down	down_turquoise	down	hsa.miR.107	up	-0.399377	0.00023242	ENSG00000126581	BECN1	1		-0.204245	0.0415486	0.183992	0.0595893	6.8241e-05	0	1	1	0
circ206	circATRNL1_6	chr10	115268444	115120185	+	ENSG00000107518	ATRNL1	down		down	hsa.miR.363.3p	up	-0.317642	0.00308697	ENSG00000119541	VPS4B			-0.291003	0.00637844	0.222433	0.0292828	6.8359e-05	0	0	1	0
circ219	circATRNL1_10	chr10	115315736	115215697	+	ENSG00000107518	ATRNL1		down_turquoise	down	hsa.miR.708.5p	up	-0.199181	0.0455711	ENSG00000163629	PTPN13		1	-0.377083	0.000544021	0.233766	0.0232679	6.83868e-05	0	0	1	0
circ15905	circNRXN1_3	chr2	50472298	50620183	-	ENSG00000179915	NRXN1	down		down	hsa.miR.708.5p	up	-0.216171	0.0331142	ENSG00000116044	NFE2L2			-0.404387	0.000215877	0.16563	0.0806948	6.83872e-05	0	0	1	0
circ217	circATRNL1_9	chr10	115315736	115120185	+	ENSG00000107518	ATRNL1	down	down_turquoise	down	hsa.miR.130b.5p	up	-0.298159	0.00520265	ENSG00000163728	TTC14			-0.363538	0.000837535	0.132207	0.132428	6.84067e-05	0	0	0	1
circ16286	circZNF638_2	chr2	71427414	71426460	+	ENSG00000075292	ZNF638	down		down	hsa.miR.766.3p	up	-0.311524	0.00365004	ENSG00000139644	TMBIM6			-0.388714	0.000370307	0.021681	0.427765	6.85242e-05	0	0	1	0
circ246	circATRNL1_11	chr10	115469329	115120185	+	ENSG00000107518	ATRNL1	down	down_turquoise	down	hsa.miR.107	up	-0.399377	0.00023242	ENSG00000108946	PRKAR1A	1		-0.239819	0.0206158	0.138792	0.120789	6.8584e-05	0	1	1	0
circ217	circATRNL1_9	chr10	115315736	115120185	+	ENSG00000107518	ATRNL1	down	down_turquoise	down	hsa.miR.130b.5p	up	-0.298159	0.00520265	ENSG00000139505	MTMR6			-0.349624	0.00128158	0.160964	0.0868466	6.86146e-05	0	0	0	1
circ219	circATRNL1_10	chr10	115315736	115215697	+	ENSG00000107518	ATRNL1		down_turquoise	down	hsa.miR.708.5p	up	-0.199181	0.0455711	ENSG00000166483	WEE1		1	-0.298408	0.00529191	0.326416	0.00241314	6.89127e-05	0	0	1	0
circ27587	circDDX3Y	chrY	12913062	12909360	+	ENSG00000067048	DDX3Y	down		down	hsa.miR.148a.3p	up	-0.340794	0.00158703	ENSG00000141367	CLTC			-0.22515	0.0277369	0.259773	0.0132281	6.8948e-05	0	0	1	0
circ246	circATRNL1_11	chr10	115469329	115120185	+	ENSG00000107518	ATRNL1	down	down_turquoise	down	hsa.miR.107	up	-0.399377	0.00023242	ENSG00000011260	UTP18			-0.198136	0.0464448	0.189437	0.054226	6.92633e-05	0	0	1	0
circ5511	circARID1A	chr1	26732792	26729651	+	ENSG00000117713	ARID1A	up		up	hsa.miR.204.3p	down	-0.37186	0.000599038	ENSG00000175216	CKAP5	1		-0.270394	0.0104814	0.156186	0.0934957	6.94365e-05	0	0	0	1
circ27587	circDDX3Y	chrY	12913062	12909360	+	ENSG00000067048	DDX3Y	down		down	hsa.miR.148a.3p	up	-0.340794	0.00158703	ENSG00000127995	CASD1	1		-0.230888	0.0246894	0.254225	0.0149881	6.94613e-05	0	1	1	0
circ206	circATRNL1_6	chr10	115268444	115120185	+	ENSG00000107518	ATRNL1	down		down	hsa.miR.363.3p	up	-0.317642	0.00308697	ENSG00000138430	OLA1			-0.317753	0.00318032	0.183761	0.0598256	6.9468e-05	0	0	1	0
circ246	circATRNL1_11	chr10	115469329	115120185	+	ENSG00000107518	ATRNL1	down	down_turquoise	down	hsa.miR.148a.3p	up	-0.358576	0.000919439	ENSG00000058091	CDK14	1		-0.285776	0.00712548	0.158908	0.0896634	6.94766e-05	0	1	1	0
circ206	circATRNL1_6	chr10	115268444	115120185	+	ENSG00000107518	ATRNL1	down		down	hsa.miR.363.3p	up	-0.317642	0.00308697	ENSG00000118402	ELOVL4			-0.369647	0.000690914	0.070923	0.275501	6.94944e-05	0	0	1	0
circ206	circATRNL1_6	chr10	115268444	115120185	+	ENSG00000107518	ATRNL1	down		down	hsa.miR.363.3p	up	-0.317642	0.00308697	ENSG00000125868	DSTN			-0.325157	0.00259535	0.171556	0.073354	6.95045e-05	0	0	1	0
circ5511	circARID1A	chr1	26732792	26729651	+	ENSG00000117713	ARID1A	up		up	hsa.miR.204.3p	down	-0.37186	0.000599038	ENSG00000066557	LRRC40	1		-0.312693	0.0036444	0.0729872	0.26972	6.96217e-05	0	0	0	1
circ21473	circATG5	chr6	106248150	106308491	-	ENSG00000057663	ATG5	down	down_turquoise	down	hsa.miR.450b.5p	up	-0.202514	0.0428739	ENSG00000109458	GAB1			-0.432803	7.60289e-05	0.108215	0.181066	6.97633e-05	0	0	1	0
circ206	circATRNL1_6	chr10	115268444	115120185	+	ENSG00000107518	ATRNL1	down		down	hsa.let.7g.3p	up	-0.414378	0.000133887	ENSG00000153037	SRP19			-0.218037	0.0320036	0.129236	0.13792	6.98413e-05	0	0	0	1
circ27587	circDDX3Y	chrY	12913062	12909360	+	ENSG00000067048	DDX3Y	down		down	hsa.miR.148a.3p	up	-0.340794	0.00158703	ENSG00000205060	SLC35B4	1		-0.265984	0.0114685	0.217031	0.0325655	7.00213e-05	0	1	1	0
circ27587	circDDX3Y	chrY	12913062	12909360	+	ENSG00000067048	DDX3Y	down		down	hsa.miR.148a.3p	up	-0.340794	0.00158703	ENSG00000166266	CUL5			-0.20761	0.0389956	0.273522	0.00960379	7.0189e-05	0	0	1	0
circ17709	circSLC4A7_1	chr3	27379249	27424152	-	ENSG00000033867	SLC4A7	down		down	hsa.miR.708.5p	up	-0.197115	0.0473089	ENSG00000163629	PTPN13		1	-0.377083	0.000544021	0.234048	0.0231327	7.02933e-05	0	0	1	0
circ246	circATRNL1_11	chr10	115469329	115120185	+	ENSG00000107518	ATRNL1	down	down_turquoise	down	hsa.miR.708.5p	up	-0.280353	0.00814435	ENSG00000116044	NFE2L2			-0.404387	0.000215877	0.0495213	0.338682	7.03032e-05	0	0	1	0
circ246	circATRNL1_11	chr10	115469329	115120185	+	ENSG00000107518	ATRNL1	down	down_turquoise	down	hsa.miR.130b.5p	up	-0.286115	0.00706556	ENSG00000104231	ZFAND1			-0.37301	0.000620523	0.1302	0.136122	7.04412e-05	0	0	0	1
circ206	circATRNL1_6	chr10	115268444	115120185	+	ENSG00000107518	ATRNL1	down		down	hsa.let.7g.3p	up	-0.414378	0.000133887	ENSG00000145362	ANK2			-0.25472	0.014957	0.0630358	0.298122	7.04612e-05	1	0	0	0
circ246	circATRNL1_11	chr10	115469329	115120185	+	ENSG00000107518	ATRNL1	down	down_turquoise	down	hsa.miR.130b.5p	up	-0.286115	0.00706556	ENSG00000171806	METTL18			-0.337067	0.00185311	0.199002	0.0457196	7.06272e-05	0	0	1	0
circ217	circATRNL1_9	chr10	115315736	115120185	+	ENSG00000107518	ATRNL1	down	down_turquoise	down	hsa.miR.130b.5p	up	-0.298159	0.00520265	ENSG00000101745	ANKRD12			-0.312415	0.00367151	0.21898	0.0313485	7.06464e-05	0	0	1	0
circ206	circATRNL1_6	chr10	115268444	115120185	+	ENSG00000107518	ATRNL1	down		down	hsa.miR.363.3p	up	-0.317642	0.00308697	ENSG00000132294	EFR3A			-0.353727	0.00113258	0.11262	0.171403	7.06936e-05	1	0	1	0
circ217	circATRNL1_9	chr10	115315736	115120185	+	ENSG00000107518	ATRNL1	down	down_turquoise	down	hsa.miR.130b.5p	up	-0.298159	0.00520265	ENSG00000123505	AMD1			-0.335493	0.00193883	0.184086	0.0594929	7.07801e-05	0	0	1	0
circ7234	circNEMF_1	chr14	49795791	49831361	-	ENSG00000165525	NEMF		down_turquoise	down	hsa.miR.450b.5p	up	-0.228948	0.0256873	ENSG00000138593	SECISBP2L			-0.370357	0.000675485	0.213919	0.0345874	7.07834e-05	0	0	1	0
circ206	circATRNL1_6	chr10	115268444	115120185	+	ENSG00000107518	ATRNL1	down		down	hsa.miR.363.3p	up	-0.317642	0.00308697	ENSG00000147124	ZNF41			-0.36107	0.000904359	0.0936652	0.21529	7.0875e-05	0	0	1	0
circ246	circATRNL1_11	chr10	115469329	115120185	+	ENSG00000107518	ATRNL1	down	down_turquoise	down	hsa.miR.107	up	-0.399377	0.00023242	ENSG00000118733	OLFM3			-0.228064	0.0262493	0.152676	0.0986077	7.09324e-05	0	0	1	0
circ217	circATRNL1_9	chr10	115315736	115120185	+	ENSG00000107518	ATRNL1	down	down_turquoise	down	hsa.miR.130b.5p	up	-0.298159	0.00520265	ENSG00000103035	PSMD7	1		-0.315624	0.00336879	0.214268	0.0343555	7.09881e-05	0	1	1	0
circ246	circATRNL1_11	chr10	115469329	115120185	+	ENSG00000107518	ATRNL1	down	down_turquoise	down	hsa.miR.708.5p	up	-0.280353	0.00814435	ENSG00000148730	EIF4EBP2			-0.374522	0.000591054	0.13631	0.12509	7.099e-05	1	0	1	0
circ246	circATRNL1_11	chr10	115469329	115120185	+	ENSG00000107518	ATRNL1	down	down_turquoise	down	hsa.miR.148a.3p	up	-0.358576	0.000919439	ENSG00000163788	SNRK			-0.255771	0.0144788	0.199588	0.0452346	7.09927e-05	0	0	1	0
circ27587	circDDX3Y	chrY	12913062	12909360	+	ENSG00000067048	DDX3Y	down		down	hsa.miR.148a.3p	up	-0.340794	0.00158703	ENSG00000102466	FGF14	1		-0.274746	0.00932687	0.205202	0.0407915	7.11584e-05	0	1	0	0
circ206	circATRNL1_6	chr10	115268444	115120185	+	ENSG00000107518	ATRNL1	down		down	hsa.let.7g.3p	up	-0.414378	0.000133887	ENSG00000134759	ELP2			-0.209521	0.0376593	0.139399	0.119753	7.11596e-05	0	0	1	0
circ5511	circARID1A	chr1	26732792	26729651	+	ENSG00000117713	ARID1A	up		up	hsa.miR.204.3p	down	-0.37186	0.000599038	ENSG00000188958	UTS2B			-0.198815	0.0458793	0.236446	0.0220057	7.12604e-05	0	0	0	1
circ217	circATRNL1_9	chr10	115315736	115120185	+	ENSG00000107518	ATRNL1	down	down_turquoise	down	hsa.miR.130b.5p	up	-0.298159	0.00520265	ENSG00000110344	UBE4A			-0.303838	0.00460152	0.229634	0.0253308	7.14275e-05	0	0	1	0
circ217	circATRNL1_9	chr10	115315736	115120185	+	ENSG00000107518	ATRNL1	down	down_turquoise	down	hsa.miR.130b.5p	up	-0.298159	0.00520265	ENSG00000066084	DIP2B			-0.389917	0.00035559	0.0530772	0.327806	7.14299e-05	0	0	1	0
circ27587	circDDX3Y	chrY	12913062	12909360	+	ENSG00000067048	DDX3Y	down		down	hsa.chr5.14497.s	up	-0.242594	0.0193225	ENSG00000138604	GLCE			-0.377672	0.000493796	0.180048	0.0637208	7.15875e-05	0	0	0	1
circ246	circATRNL1_11	chr10	115469329	115120185	+	ENSG00000107518	ATRNL1	down	down_turquoise	down	hsa.miR.130b.5p	up	-0.286115	0.00706556	ENSG00000217128	FNIP1			-0.359496	0.000949434	0.15806	0.0908451	7.1734e-05	0	0	1	0
circ3279	circFAT3	chr11	92355404	92352096	+	ENSG00000165323	FAT3	down	down_turquoise	down	hsa.miR.708.5p	up	-0.276348	0.00911154	ENSG00000180370	PAK2			-0.310009	0.00391405	0.247865	0.0172438	7.23021e-05	0	0	1	0
circ17709	circSLC4A7_1	chr3	27379249	27424152	-	ENSG00000033867	SLC4A7	down		down	hsa.miR.708.5p	up	-0.197115	0.0473089	ENSG00000166483	WEE1		1	-0.298408	0.00529191	0.325658	0.00246573	7.25416e-05	0	0	1	0
circ27587	circDDX3Y	chrY	12913062	12909360	+	ENSG00000067048	DDX3Y	down		down	hsa.miR.148a.3p	up	-0.340794	0.00158703	ENSG00000172869	DMXL1			-0.232585	0.0238429	0.250255	0.0163649	7.2739e-05	0	0	1	0
circ206	circATRNL1_6	chr10	115268444	115120185	+	ENSG00000107518	ATRNL1	down		down	hsa.miR.363.3p	up	-0.317642	0.00308697	ENSG00000185619	PCGF3			-0.365729	0.000782003	0.0776101	0.256994	7.28564e-05	0	0	1	0
circ206	circATRNL1_6	chr10	115268444	115120185	+	ENSG00000107518	ATRNL1	down		down	hsa.miR.363.3p	up	-0.317642	0.00308697	ENSG00000155744	FAM126B			-0.348821	0.00131268	0.121349	0.153227	7.29094e-05	0	0	1	0
circ206	circATRNL1_6	chr10	115268444	115120185	+	ENSG00000107518	ATRNL1	down		down	hsa.miR.148a.3p	up	-0.332569	0.00202179	ENSG00000150625	GPM6A			-0.285298	0.00721067	0.202856	0.0426047	7.29299e-05	0	0	0	1
circ206	circATRNL1_6	chr10	115268444	115120185	+	ENSG00000107518	ATRNL1	down		down	hsa.miR.363.3p	up	-0.317642	0.00308697	ENSG00000197016	ZNF470			-0.333734	0.00203881	0.152259	0.0992291	7.32784e-05	0	0	1	0
circ206	circATRNL1_6	chr10	115268444	115120185	+	ENSG00000107518	ATRNL1	down		down	hsa.miR.363.3p	up	-0.317642	0.00308697	ENSG00000109756	RAPGEF2			-0.336357	0.00189134	0.147208	0.106967	7.32788e-05	0	0	1	0
circ246	circATRNL1_11	chr10	115469329	115120185	+	ENSG00000107518	ATRNL1	down	down_turquoise	down	hsa.miR.107	up	-0.399377	0.00023242	ENSG00000196305	IARS			-0.23698	0.0218743	0.137512	0.122995	7.33588e-05	0	0	1	0
circ5511	circARID1A	chr1	26732792	26729651	+	ENSG00000117713	ARID1A	up		up	hsa.miR.204.3p	down	-0.37186	0.000599038	ENSG00000163281	GNPDA2			-0.305257	0.00443466	0.0853581	0.236371	7.36256e-05	0	0	0	1
circ206	circATRNL1_6	chr10	115268444	115120185	+	ENSG00000107518	ATRNL1	down		down	hsa.let.7g.3p	up	-0.414378	0.000133887	ENSG00000113441	LNPEP			-0.223929	0.0285094	0.115145	0.166011	7.4211e-05	0	0	1	0
circ246	circATRNL1_11	chr10	115469329	115120185	+	ENSG00000107518	ATRNL1	down	down_turquoise	down	hsa.miR.107	up	-0.399377	0.00023242	ENSG00000139116	KIF21A			-0.218623	0.0316411	0.161408	0.0862479	7.4272e-05	0	0	1	0
circ27587	circDDX3Y	chrY	12913062	12909360	+	ENSG00000067048	DDX3Y	down		down	hsa.miR.148a.3p	up	-0.340794	0.00158703	ENSG00000163788	SNRK			-0.255771	0.0144788	0.225231	0.0276916	7.44795e-05	0	0	1	0
circ246	circATRNL1_11	chr10	115469329	115120185	+	ENSG00000107518	ATRNL1	down	down_turquoise	down	hsa.miR.107	up	-0.399377	0.00023242	ENSG00000087053	MTMR2	1		-0.216494	0.0329736	0.163799	0.0830701	7.45118e-05	0	1	1	0
circ206	circATRNL1_6	chr10	115268444	115120185	+	ENSG00000107518	ATRNL1	down		down	hsa.miR.363.3p	up	-0.317642	0.00308697	ENSG00000085788	DDHD2	1		-0.33176	0.00215652	0.154643	0.0957179	7.4571e-05	0	1	1	0
circ27587	circDDX3Y	chrY	12913062	12909360	+	ENSG00000067048	DDX3Y	down		down	hsa.miR.148a.3p	up	-0.340794	0.00158703	ENSG00000172667	ZMAT3			-0.214027	0.0345153	0.265305	0.0116505	7.467e-05	0	0	1	0
circ246	circATRNL1_11	chr10	115469329	115120185	+	ENSG00000107518	ATRNL1	down	down_turquoise	down	hsa.miR.107	up	-0.399377	0.00023242	ENSG00000071243	ING3			-0.210539	0.0369435	0.170602	0.0745009	7.48243e-05	0	0	1	0
circ246	circATRNL1_11	chr10	115469329	115120185	+	ENSG00000107518	ATRNL1	down	down_turquoise	down	hsa.let.7g.3p	up	-0.219735	0.0308871	ENSG00000145087	STXBP5L	1		-0.40016	0.000250308	0.163907	0.0829286	7.49714e-05	0	1	0	0
circ206	circATRNL1_6	chr10	115268444	115120185	+	ENSG00000107518	ATRNL1	down		down	hsa.miR.363.3p	up	-0.317642	0.00308697	ENSG00000157212	PAXIP1			-0.368197	0.000723439	0.0667144	0.287468	7.5057e-05	0	0	0	1
circ217	circATRNL1_9	chr10	115315736	115120185	+	ENSG00000107518	ATRNL1	down	down_turquoise	down	hsa.miR.130b.5p	up	-0.298159	0.00520265	ENSG00000162368	CMPK1			-0.345366	0.00145458	0.162033	0.0854082	7.54996e-05	0	0	1	0
circ5511	circARID1A	chr1	26732792	26729651	+	ENSG00000117713	ARID1A	up		up	hsa.miR.204.3p	down	-0.37186	0.000599038	ENSG00000065613	SLK			-0.304764	0.00449208	0.0834683	0.241317	7.58068e-05	0	0	1	0
circ246	circATRNL1_11	chr10	115469329	115120185	+	ENSG00000107518	ATRNL1	down	down_turquoise	down	hsa.miR.148a.3p	up	-0.358576	0.000919439	ENSG00000162374	ELAVL4			-0.279976	0.00821959	0.161639	0.0859365	7.58161e-05	0	0	0	1
circ27587	circDDX3Y	chrY	12913062	12909360	+	ENSG00000067048	DDX3Y	down		down	hsa.miR.148a.3p	up	-0.340794	0.00158703	ENSG00000170540	ARL6IP1			-0.215971	0.0332431	0.262897	0.0123164	7.58495e-05	0	0	1	0
circ206	circATRNL1_6	chr10	115268444	115120185	+	ENSG00000107518	ATRNL1	down		down	hsa.let.7g.3p	up	-0.414378	0.000133887	ENSG00000135018	UBQLN1			-0.202024	0.0432791	0.14395	0.112178	7.5873e-05	0	0	1	0
circ5511	circARID1A	chr1	26732792	26729651	+	ENSG00000117713	ARID1A	up		up	hsa.miR.204.3p	down	-0.37186	0.000599038	ENSG00000138604	GLCE			-0.317228	0.00322586	0.0502303	0.336503	7.58977e-05	0	0	0	1
circ5511	circARID1A	chr1	26732792	26729651	+	ENSG00000117713	ARID1A	up		up	hsa.miR.204.3p	down	-0.37186	0.000599038	ENSG00000050438	SLC4A8	1		-0.320406	0.00295851	0.0402573	0.367622	7.60254e-05	0	0	1	0
circ206	circATRNL1_6	chr10	115268444	115120185	+	ENSG00000107518	ATRNL1	down		down	hsa.miR.363.3p	up	-0.317642	0.00308697	ENSG00000166881	NEMP1			-0.320406	0.00295851	0.172974	0.0716733	7.63358e-05	0	0	1	0
circ246	circATRNL1_11	chr10	115469329	115120185	+	ENSG00000107518	ATRNL1	down	down_turquoise	down	hsa.miR.148a.3p	up	-0.358576	0.000919439	ENSG00000088682	COQ9			-0.235285	0.0225454	0.218547	0.0316155	7.64149e-05	0	0	1	0
circ246	circATRNL1_11	chr10	115469329	115120185	+	ENSG00000107518	ATRNL1	down	down_turquoise	down	hsa.miR.107	up	-0.399377	0.00023242	ENSG00000158987	RAPGEF6			-0.253702	0.0152966	0.106613	0.184662	7.65319e-05	0	0	1	0
circ27587	circDDX3Y	chrY	12913062	12909360	+	ENSG00000067048	DDX3Y	down		down	hsa.miR.148a.3p	up	-0.340794	0.00158703	ENSG00000104643	MTMR9			-0.247179	0.0175034	0.232976	0.0236515	7.65809e-05	0	0	1	0
circ206	circATRNL1_6	chr10	115268444	115120185	+	ENSG00000107518	ATRNL1	down		down	hsa.miR.148a.3p	up	-0.332569	0.00202179	ENSG00000139926	FRMD6			-0.303054	0.00457766	0.173442	0.0711257	7.67098e-05	0	0	1	0
circ206	circATRNL1_6	chr10	115268444	115120185	+	ENSG00000107518	ATRNL1	down		down	hsa.miR.363.3p	up	-0.317642	0.00308697	ENSG00000124532	MRS2			-0.3578	0.00100031	0.0944601	0.213331	7.67581e-05	0	0	1	0
circ5511	circARID1A	chr1	26732792	26729651	+	ENSG00000117713	ARID1A	up		up	hsa.miR.204.3p	down	-0.37186	0.000599038	ENSG00000181904	C5orf24			-0.299426	0.00515596	0.0943148	0.213688	7.68848e-05	0	0	1	0
circ246	circATRNL1_11	chr10	115469329	115120185	+	ENSG00000107518	ATRNL1	down	down_turquoise	down	hsa.miR.107	up	-0.399377	0.00023242	ENSG00000112081	SRSF3			-0.255646	0.0146538	0.102478	0.194141	7.70074e-05	0	0	1	0
circ246	circATRNL1_11	chr10	115469329	115120185	+	ENSG00000107518	ATRNL1	down	down_turquoise	down	hsa.miR.107	up	-0.399377	0.00023242	ENSG00000102401	ARMCX3			-0.244138	0.0188167	0.122348	0.151229	7.70247e-05	0	0	1	0
circ217	circATRNL1_9	chr10	115315736	115120185	+	ENSG00000107518	ATRNL1	down	down_turquoise	down	hsa.miR.130b.5p	up	-0.298159	0.00520265	ENSG00000100528	CNIH1			-0.341448	0.001632	0.167797	0.0779496	7.70719e-05	0	0	1	0
circ217	circATRNL1_9	chr10	115315736	115120185	+	ENSG00000107518	ATRNL1	down	down_turquoise	down	hsa.miR.130b.5p	up	-0.298159	0.00520265	ENSG00000100697	DICER1			-0.361564	0.000890621	0.126394	0.143312	7.72947e-05	0	0	1	0
circ27587	circDDX3Y	chrY	12913062	12909360	+	ENSG00000067048	DDX3Y	down		down	hsa.miR.148a.3p	up	-0.340794	0.00158703	ENSG00000196482	ESRRG			-0.262004	0.0125716	0.215892	0.0332941	7.73165e-05	0	0	0	1
circ5511	circARID1A	chr1	26732792	26729651	+	ENSG00000117713	ARID1A	up		up	hsa.miR.204.3p	down	-0.37186	0.000599038	ENSG00000071537	SEL1L			-0.280421	0.008266	0.131047	0.134556	7.75194e-05	0	0	0	1
circ27587	circDDX3Y	chrY	12913062	12909360	+	ENSG00000067048	DDX3Y	down		down	hsa.miR.148a.3p	up	-0.340794	0.00158703	ENSG00000165813	CCDC186			-0.246546	0.0177455	0.232813	0.0237311	7.77273e-05	0	0	1	0
circ7886	circVRK1	chr14	96860735	96833467	+	ENSG00000100749	VRK1		down_turquoise	down	hsa.miR.450b.5p	up	-0.273195	0.00967881	ENSG00000111276	CDKN1B			-0.395131	0.000297788	0.0866198	0.233099	7.8083e-05	1	0	1	0
circ217	circATRNL1_9	chr10	115315736	115120185	+	ENSG00000107518	ATRNL1	down	down_turquoise	down	hsa.miR.130b.5p	up	-0.298159	0.00520265	ENSG00000156467	UQCRB			-0.322689	0.00277874	0.198076	0.0464939	7.8114e-05	0	0	0	1
circ206	circATRNL1_6	chr10	115268444	115120185	+	ENSG00000107518	ATRNL1	down		down	hsa.let.7g.3p	up	-0.414378	0.000133887	ENSG00000109819	PPARGC1A			-0.235067	0.022758	0.0911868	0.221465	7.83816e-05	0	0	0	1
circ206	circATRNL1_6	chr10	115268444	115120185	+	ENSG00000107518	ATRNL1	down		down	hsa.let.7g.3p	up	-0.414378	0.000133887	ENSG00000119865	CNRIP1			-0.233741	0.023388	0.0934626	0.215792	7.8474e-05	0	0	0	1
circ202	circATRNL1_5	chr10	115241725	115120185	+	ENSG00000107518	ATRNL1	down		down	hsa.miR.363.3p	up	-0.209506	0.0376264	ENSG00000136152	COG3			-0.411113	0.000169938	0.147877	0.105918	7.86287e-05	0	0	1	0
circ206	circATRNL1_6	chr10	115268444	115120185	+	ENSG00000107518	ATRNL1	down		down	hsa.chr9.24118.m	up	-0.339495	0.0016496	ENSG00000086065	CHMP5			-0.269252	0.0107632	0.208685	0.0382142	7.87538e-05	0	0	0	1
circ5511	circARID1A	chr1	26732792	26729651	+	ENSG00000117713	ARID1A	up		up	hsa.miR.204.3p	down	-0.37186	0.000599038	ENSG00000029725	RABEP1			-0.286777	0.00708186	0.117818	0.160422	7.89619e-05	0	0	1	0
circ27587	circDDX3Y	chrY	12913062	12909360	+	ENSG00000067048	DDX3Y	down		down	hsa.miR.148a.3p	up	-0.340794	0.00158703	ENSG00000197147	LRRC8B			-0.268251	0.0108777	0.206829	0.0395708	7.922e-05	0	0	1	0
circ246	circATRNL1_11	chr10	115469329	115120185	+	ENSG00000107518	ATRNL1	down	down_turquoise	down	hsa.miR.107	up	-0.399377	0.00023242	ENSG00000164331	ANKRA2			-0.21202	0.035922	0.164724	0.0818634	7.92561e-05	0	0	1	0
circ17709	circSLC4A7_1	chr3	27379249	27424152	-	ENSG00000033867	SLC4A7	down		down	hsa.P2.can246.m	up	-0.286893	0.00692985	ENSG00000166833	NAV2			-0.370264	0.00067748	0.125097	0.145821	7.93697e-05	1	0	0	0
circ27587	circDDX3Y	chrY	12913062	12909360	+	ENSG00000067048	DDX3Y	down		down	hsa.miR.148a.3p	up	-0.340794	0.00158703	ENSG00000100614	PPM1A			-0.211837	0.0359956	0.264052	0.0119931	7.94214e-05	0	0	1	0
circ500	circSUV39H2	chr10	14897517	14896846	+	ENSG00000152457	DCLRE1C		down_turquoise	down	hsa.miR.450b.5p	up	-0.233641	0.0233285	ENSG00000150867	PIP4K2A			-0.41932	0.000126095	0.0864141	0.233631	7.96365e-05	0	0	1	0
circ5511	circARID1A	chr1	26732792	26729651	+	ENSG00000117713	ARID1A	up		up	hsa.miR.204.3p	down	-0.37186	0.000599038	ENSG00000085433	WDR47			-0.266938	0.0113545	0.150945	0.101202	7.97473e-05	0	0	0	1
circ206	circATRNL1_6	chr10	115268444	115120185	+	ENSG00000107518	ATRNL1	down		down	hsa.miR.363.3p	up	-0.317642	0.00308697	ENSG00000100320	RBFOX2			-0.334598	0.00198913	0.143935	0.112204	7.981e-05	0	0	1	0
circ206	circATRNL1_6	chr10	115268444	115120185	+	ENSG00000107518	ATRNL1	down		down	hsa.let.7g.3p	up	-0.414378	0.000133887	ENSG00000066777	ARFGEF1			-0.22069	0.0303895	0.113539	0.169427	7.98482e-05	0	0	1	0
circ206	circATRNL1_6	chr10	115268444	115120185	+	ENSG00000107518	ATRNL1	down		down	hsa.miR.363.3p	up	-0.317642	0.00308697	ENSG00000122692	SMU1			-0.326391	0.00250776	0.159211	0.0892454	8.00018e-05	0	0	1	0
circ246	circATRNL1_11	chr10	115469329	115120185	+	ENSG00000107518	ATRNL1	down	down_turquoise	down	hsa.miR.107	up	-0.399377	0.00023242	ENSG00000204116	CHIC1	1		-0.23337	0.0235664	0.135707	0.126151	8.00107e-05	0	1	1	0
circ206	circATRNL1_6	chr10	115268444	115120185	+	ENSG00000107518	ATRNL1	down		down	hsa.miR.363.3p	up	-0.317642	0.00308697	ENSG00000124486	USP9X			-0.305134	0.00444895	0.193285	0.0506678	8.05025e-05	0	0	1	0
circ3279	circFAT3	chr11	92355404	92352096	+	ENSG00000165323	FAT3	down	down_turquoise	down	hsa.miR.708.5p	up	-0.276348	0.00911154	ENSG00000185033	SEMA4B			-0.29813	0.00532953	0.256127	0.0143637	8.06675e-05	0	0	0	1
circ27587	circDDX3Y	chrY	12913062	12909360	+	ENSG00000067048	DDX3Y	down		down	hsa.miR.148a.3p	up	-0.340794	0.00158703	ENSG00000164332	UBLCP1			-0.248367	0.0170562	0.228794	0.0257679	8.06676e-05	0	0	1	0
circ5511	circARID1A	chr1	26732792	26729651	+	ENSG00000117713	ARID1A	up		up	hsa.miR.204.3p	down	-0.37186	0.000599038	ENSG00000103769	RAB11A			-0.273787	0.0096805	0.139082	0.120293	8.06751e-05	0	0	0	1
circ217	circATRNL1_9	chr10	115315736	115120185	+	ENSG00000107518	ATRNL1	down	down_turquoise	down	hsa.miR.130b.5p	up	-0.298159	0.00520265	ENSG00000085365	SCAMP1			-0.347371	0.00137064	0.152965	0.0981788	8.09293e-05	0	0	1	0
circ219	circATRNL1_10	chr10	115315736	115215697	+	ENSG00000107518	ATRNL1		down_turquoise	down	hsa.miR.708.5p	up	-0.199181	0.0455711	ENSG00000158006	PAFAH2			-0.408028	0.000189763	0.165366	0.0810343	8.09948e-05	0	0	1	0
circ27587	circDDX3Y	chrY	12913062	12909360	+	ENSG00000067048	DDX3Y	down		down	hsa.miR.148a.3p	up	-0.340794	0.00158703	ENSG00000163818	LZTFL1			-0.227896	0.0262425	0.248807	0.0168929	8.12744e-05	0	0	1	0
circ27587	circDDX3Y	chrY	12913062	12909360	+	ENSG00000067048	DDX3Y	down		down	hsa.miR.148a.3p	up	-0.340794	0.00158703	ENSG00000115310	RTN4			-0.271321	0.0101192	0.201281	0.0438563	8.13511e-05	0	0	1	0
circ206	circATRNL1_6	chr10	115268444	115120185	+	ENSG00000107518	ATRNL1	down		down	hsa.let.7g.3p	up	-0.414378	0.000133887	ENSG00000154743	TSEN2			-0.266907	0.0113626	0.0110359	0.463084	8.13692e-05	0	0	0	1
circ217	circATRNL1_9	chr10	115315736	115120185	+	ENSG00000107518	ATRNL1	down	down_turquoise	down	hsa.miR.130b.5p	up	-0.298159	0.00520265	ENSG00000197885	NKIRAS1			-0.327965	0.00239989	0.187082	0.0564982	8.14627e-05	0	0	1	0
circ206	circATRNL1_6	chr10	115268444	115120185	+	ENSG00000107518	ATRNL1	down		down	hsa.miR.363.3p	up	-0.317642	0.00308697	ENSG00000198901	PRC1			-0.326762	0.002482	0.157091	0.0922089	8.15697e-05	0	0	1	0
circ246	circATRNL1_11	chr10	115469329	115120185	+	ENSG00000107518	ATRNL1	down	down_turquoise	down	hsa.miR.107	up	-0.399377	0.00023242	ENSG00000104442	ARMC1	1		-0.237721	0.02154	0.127315	0.14155	8.1786e-05	0	1	1	0
circ217	circATRNL1_9	chr10	115315736	115120185	+	ENSG00000107518	ATRNL1	down	down_turquoise	down	hsa.miR.130b.5p	up	-0.298159	0.00520265	ENSG00000163714	U2SURP			-0.332685	0.00210061	0.179002	0.0648526	8.17971e-05	0	0	0	1
circ217	circATRNL1_9	chr10	115315736	115120185	+	ENSG00000107518	ATRNL1	down	down_turquoise	down	hsa.chr5.14497.s	up	-0.251479	0.0159295	ENSG00000205268	PDE7A			-0.421483	0.000102167	0.0187503	0.437445	8.21151e-05	0	0	0	1
circ206	circATRNL1_6	chr10	115268444	115120185	+	ENSG00000107518	ATRNL1	down		down	hsa.miR.148a.3p	up	-0.332569	0.00202179	ENSG00000110768	GTF2H1			-0.277153	0.0088024	0.206191	0.0400461	8.21904e-05	0	0	1	0
circ246	circATRNL1_11	chr10	115469329	115120185	+	ENSG00000107518	ATRNL1	down	down_turquoise	down	hsa.miR.148a.3p	up	-0.358576	0.000919439	ENSG00000182890	GLUD2			-0.301341	0.0047884	0.117056	0.162002	8.22459e-05	0	0	1	0
circ3518	circEIF4G3_1	chr1	20893517	20942330	-	ENSG00000075151	EIF4G3	down		down	hsa.miR.10a.5p	up	-0.230139	0.0250709	ENSG00000111799	COL12A1			-0.385999	0.000405575	0.174256	0.0701798	8.22819e-05	0	0	1	0
circ246	circATRNL1_11	chr10	115469329	115120185	+	ENSG00000107518	ATRNL1	down	down_turquoise	down	hsa.miR.107	up	-0.399377	0.00023242	ENSG00000165678	GHITM			-0.22288	0.0291074	0.148048	0.105651	8.23969e-05	0	0	1	0
circ206	circATRNL1_6	chr10	115268444	115120185	+	ENSG00000107518	ATRNL1	down		down	hsa.let.7g.3p	up	-0.414378	0.000133887	ENSG00000115762	PLEKHB2			-0.20042	0.0445642	0.13904	0.120365	8.27391e-05	0	0	1	0
circ3279	circFAT3	chr11	92355404	92352096	+	ENSG00000165323	FAT3	down	down_turquoise	down	hsa.miR.708.5p	up	-0.276348	0.00911154	ENSG00000204580	DDR1			-0.32633	0.00251207	0.218901	0.0313974	8.27879e-05	0	0	1	0
circ206	circATRNL1_6	chr10	115268444	115120185	+	ENSG00000107518	ATRNL1	down		down	hsa.miR.363.3p	up	-0.317642	0.00308697	ENSG00000166128	RAB8B		1	-0.300352	0.00503503	0.198304	0.0463025	8.28908e-05	0	0	1	0
circ246	circATRNL1_11	chr10	115469329	115120185	+	ENSG00000107518	ATRNL1	down	down_turquoise	down	hsa.miR.107	up	-0.399377	0.00023242	ENSG00000107643	MAPK8			-0.23732	0.0217206	0.126451	0.143203	8.32161e-05	0	0	1	0
circ9676	circPHKB_2	chr16	47596531	47497399	+	ENSG00000102893	PHKB		down_turquoise	down	hsa.miR.708.5p	up	-0.215193	0.0337479	ENSG00000101888	NXT2			-0.407565	0.000192913	0.144484	0.111052	8.32226e-05	0	0	1	0
circ17709	circSLC4A7_1	chr3	27379249	27424152	-	ENSG00000033867	SLC4A7	down		down	hsa.miR.629.5p	up	-0.197751	0.0467681	ENSG00000180573	HIST1H2AC			-0.387295	0.000388377	0.206476	0.0398333	8.32746e-05	0	0	1	0
circ246	circATRNL1_11	chr10	115469329	115120185	+	ENSG00000107518	ATRNL1	down	down_turquoise	down	hsa.miR.107	up	-0.399377	0.00023242	ENSG00000124198	ARFGEF2	1		-0.225503	0.0276311	0.14359	0.112766	8.33412e-05	0	1	1	0
circ246	circATRNL1_11	chr10	115469329	115120185	+	ENSG00000107518	ATRNL1	down	down_turquoise	down	hsa.miR.107	up	-0.399377	0.00023242	ENSG00000125863	MKKS			-0.20841	0.0384528	0.165357	0.0810462	8.33554e-05	0	0	1	0
circ15905	circNRXN1_3	chr2	50472298	50620183	-	ENSG00000179915	NRXN1	down		down	hsa.miR.708.5p	up	-0.216171	0.0331142	ENSG00000135318	NT5E			-0.432309	7.74775e-05	0.0684832	0.28241	8.33778e-05	0	0	1	0
circ206	circATRNL1_6	chr10	115268444	115120185	+	ENSG00000107518	ATRNL1	down		down	hsa.chr9.24118.m	up	-0.339495	0.0016496	ENSG00000145354	CISD2			-0.286252	0.00717367	0.18228	0.0613568	8.35303e-05	0	0	0	1
circ7886	circVRK1	chr14	96860735	96833467	+	ENSG00000100749	VRK1		down_turquoise	down	hsa.miR.450b.5p	up	-0.273195	0.00967881	ENSG00000028528	SNX1			-0.399574	0.000255461	0.0644519	0.294	8.36157e-05	0	0	1	0
circ5511	circARID1A	chr1	26732792	26729651	+	ENSG00000117713	ARID1A	up		up	hsa.miR.204.3p	down	-0.37186	0.000599038	ENSG00000135250	SRPK2			-0.273572	0.00972985	0.13643	0.12488	8.37095e-05	0	0	0	1
circ19323	circGRK4	chr4	3029409	2984513	+	ENSG00000125388	GRK4	down		down	hsa.miR.450b.5p	up	-0.198287	0.046317	ENSG00000070214	SLC44A1			-0.436474	6.60154e-05	0.0846569	0.2382	8.37551e-05	0	0	1	0
circ27587	circDDX3Y	chrY	12913062	12909360	+	ENSG00000067048	DDX3Y	down		down	hsa.miR.148a.3p	up	-0.340794	0.00158703	ENSG00000116030	SUMO1			-0.236103	0.0221642	0.239321	0.0207147	8.37867e-05	0	0	1	0
circ19323	circGRK4	chr4	3029409	2984513	+	ENSG00000125388	GRK4	down		down	hsa.miR.450b.5p	up	-0.198287	0.046317	ENSG00000087274	ADD1			-0.359404	0.000952147	0.249756	0.0165452	8.38873e-05	0	0	1	0
circ21803	circARFGEF3	chr6	138335188	138333970	+	ENSG00000112379	ARFGEF3		down_violet	down	hsa.miR.708.5p	up	-0.249787	0.0165342	ENSG00000171766	GATM			-0.417808	0.000133292	0.0518896	0.331423	8.39636e-05	1	0	1	0
circ5511	circARID1A	chr1	26732792	26729651	+	ENSG00000117713	ARID1A	up		up	hsa.miR.204.3p	down	-0.37186	0.000599038	ENSG00000076513	ANKRD13A			-0.322381	0.00280245	0.0194378	0.43517	8.39773e-05	0	0	0	1
circ246	circATRNL1_11	chr10	115469329	115120185	+	ENSG00000107518	ATRNL1	down	down_turquoise	down	hsa.miR.148a.3p	up	-0.358576	0.000919439	ENSG00000184368	MAP7D2			-0.231336	0.0244639	0.217113	0.0325137	8.40552e-05	0	0	1	0
circ17709	circSLC4A7_1	chr3	27379249	27424152	-	ENSG00000033867	SLC4A7	down		down	hsa.miR.708.5p	up	-0.197115	0.0473089	ENSG00000158006	PAFAH2			-0.408028	0.000189763	0.164933	0.0815935	8.41721e-05	0	0	1	0
circ246	circATRNL1_11	chr10	115469329	115120185	+	ENSG00000107518	ATRNL1	down	down_turquoise	down	hsa.miR.107	up	-0.399377	0.00023242	ENSG00000132485	ZRANB2			-0.218252	0.0318696	0.152368	0.0990666	8.43013e-05	0	0	1	0
circ5522	circCPSF6	chr12	69262562	69251129	+	ENSG00000111605	CPSF6	down		down	hsa.miR.107	up	-0.282951	0.00777559	ENSG00000072422	RHOBTB1	1		-0.299889	0.00509518	0.244786	0.0185586	8.44463e-05	0	1	1	0
circ27587	circDDX3Y	chrY	12913062	12909360	+	ENSG00000067048	DDX3Y	down		down	hsa.miR.148a.3p	up	-0.340794	0.00158703	ENSG00000106723	SPIN1			-0.220506	0.0304214	0.253168	0.015345	8.50042e-05	0	0	1	0
circ217	circATRNL1_9	chr10	115315736	115120185	+	ENSG00000107518	ATRNL1	down	down_turquoise	down	hsa.miR.130b.5p	up	-0.298159	0.00520265	ENSG00000011454	RABGAP1			-0.266475	0.011476	0.262553	0.0124143	8.50396e-05	0	0	1	0
circ5522	circCPSF6	chr12	69262562	69251129	+	ENSG00000111605	CPSF6	down		down	hsa.miR.107	up	-0.282951	0.00777559	ENSG00000197763	TXNRD3			-0.375663	0.000569649	0.114279	0.167463	8.5094e-05	0	0	1	0
circ3518	circEIF4G3_1	chr1	20893517	20942330	-	ENSG00000075151	EIF4G3	down		down	hsa.miR.3938	up	-0.295345	0.0055946	ENSG00000137203	TFAP2A			-0.233	0.0237459	0.295391	0.00558795	8.51539e-05	0	0	0	1
circ206	circATRNL1_6	chr10	115268444	115120185	+	ENSG00000107518	ATRNL1	down		down	hsa.let.7g.3p	up	-0.414378	0.000133887	ENSG00000023287	RB1CC1			-0.206097	0.040149	0.128628	0.139062	8.56683e-05	1	0	0	0
circ206	circATRNL1_6	chr10	115268444	115120185	+	ENSG00000107518	ATRNL1	down		down	hsa.let.7g.3p	up	-0.414378	0.000133887	ENSG00000011566	MAP4K3			-0.203381	0.0422149	0.132291	0.132276	8.56788e-05	0	0	1	0
circ22965	circKMT2E_4	chr7	105091314	105066727	+	ENSG00000005483	KMT2E	down		down	hsa.miR.221.3p	up	-0.205252	0.0407536	ENSG00000151150	ANK3	1		-0.442645	5.18903e-05	0.0446569	0.353774	8.57291e-05	1	1	1	0
circ27587	circDDX3Y	chrY	12913062	12909360	+	ENSG00000067048	DDX3Y	down		down	hsa.miR.148a.3p	up	-0.340794	0.00158703	ENSG00000180998	GPR137C	1		-0.287766	0.00678027	0.174793	0.069561	8.57668e-05	0	1	1	0
circ206	circATRNL1_6	chr10	115268444	115120185	+	ENSG00000107518	ATRNL1	down		down	hsa.let.7g.3p	up	-0.414378	0.000133887	ENSG00000114796	KLHL24			-0.212545	0.0355657	0.119275	0.157426	8.58779e-05	0	0	0	1
circ206	circATRNL1_6	chr10	115268444	115120185	+	ENSG00000107518	ATRNL1	down		down	hsa.miR.363.3p	up	-0.317642	0.00308697	ENSG00000114127	XRN1			-0.316117	0.00332423	0.171712	0.0731679	8.59978e-05	0	0	1	0
circ27587	circDDX3Y	chrY	12913062	12909360	+	ENSG00000067048	DDX3Y	down		down	hsa.miR.148a.3p	up	-0.340794	0.00158703	ENSG00000067064	IDI1			-0.278541	0.00851149	0.187972	0.0556311	8.60606e-05	0	0	1	0
circ246	circATRNL1_11	chr10	115469329	115120185	+	ENSG00000107518	ATRNL1	down	down_turquoise	down	hsa.miR.148a.3p	up	-0.358576	0.000919439	ENSG00000110768	GTF2H1			-0.277153	0.0088024	0.156486	0.0930664	8.62342e-05	0	0	1	0
circ206	circATRNL1_6	chr10	115268444	115120185	+	ENSG00000107518	ATRNL1	down		down	hsa.miR.363.3p	up	-0.317642	0.00308697	ENSG00000120519	SLC10A7			-0.282334	0.00789282	0.21969	0.0309145	8.62359e-05	0	0	1	0
circ246	circATRNL1_11	chr10	115469329	115120185	+	ENSG00000107518	ATRNL1	down	down_turquoise	down	hsa.miR.107	up	-0.399377	0.00023242	ENSG00000135930	EIF4E2			-0.230223	0.0251286	0.134087	0.129031	8.62719e-05	0	0	1	0
circ246	circATRNL1_11	chr10	115469329	115120185	+	ENSG00000107518	ATRNL1	down	down_turquoise	down	hsa.miR.107	up	-0.399377	0.00023242	ENSG00000182287	AP1S2			-0.207084	0.0394182	0.164215	0.0825254	8.65174e-05	1	0	1	0
circ246	circATRNL1_11	chr10	115469329	115120185	+	ENSG00000107518	ATRNL1	down	down_turquoise	down	hsa.miR.107	up	-0.399377	0.00023242	ENSG00000109184	DCUN1D4	1		-0.241361	0.0199575	0.116115	0.163968	8.69648e-05	0	1	1	0
circ246	circATRNL1_11	chr10	115469329	115120185	+	ENSG00000107518	ATRNL1	down	down_turquoise	down	hsa.miR.107	up	-0.399377	0.00023242	ENSG00000137168	PPIL1			-0.203875	0.0418331	0.167501	0.0783208	8.70576e-05	0	0	1	0
circ27587	circDDX3Y	chrY	12913062	12909360	+	ENSG00000067048	DDX3Y	down		down	hsa.miR.148a.3p	up	-0.340794	0.00158703	ENSG00000095002	MSH2			-0.241579	0.0197456	0.231609	0.0243269	8.71395e-05	0	0	1	0
circ206	circATRNL1_6	chr10	115268444	115120185	+	ENSG00000107518	ATRNL1	down		down	hsa.let.7g.3p	up	-0.414378	0.000133887	ENSG00000068383	INPP5A			-0.207948	0.0387874	0.124466	0.14705	8.72706e-05	0	0	1	0
circ5511	circARID1A	chr1	26732792	26729651	+	ENSG00000117713	ARID1A	up		up	hsa.miR.204.3p	down	-0.37186	0.000599038	ENSG00000134108	ARL8B			-0.277582	0.00884779	0.125854	0.144354	8.74144e-05	0	0	1	0
circ206	circATRNL1_6	chr10	115268444	115120185	+	ENSG00000107518	ATRNL1	down		down	hsa.miR.148a.3p	up	-0.332569	0.00202179	ENSG00000156411	C14orf2			-0.267727	0.011012	0.21425	0.0343676	8.74198e-05	0	0	1	0
circ246	circATRNL1_11	chr10	115469329	115120185	+	ENSG00000107518	ATRNL1	down	down_turquoise	down	hsa.miR.148a.3p	up	-0.358576	0.000919439	ENSG00000139926	FRMD6			-0.303054	0.00457766	0.107862	0.181854	8.74445e-05	0	0	1	0
circ5511	circARID1A	chr1	26732792	26729651	+	ENSG00000117713	ARID1A	up		up	hsa.miR.204.3p	down	-0.37186	0.000599038	ENSG00000138356	AOX1			-0.227909	0.0263309	0.19549	0.048712	8.77361e-05	0	0	0	1
circ206	circATRNL1_6	chr10	115268444	115120185	+	ENSG00000107518	ATRNL1	down		down	hsa.let.7g.3p	up	-0.414378	0.000133887	ENSG00000068615	REEP1			-0.219579	0.0310569	0.106166	0.185672	8.81027e-05	0	0	0	1
circ27587	circDDX3Y	chrY	12913062	12909360	+	ENSG00000067048	DDX3Y	down		down	hsa.miR.148a.3p	up	-0.340794	0.00158703	ENSG00000109339	MAPK10			-0.208813	0.038122	0.261189	0.0128082	8.83859e-05	0	0	0	1
circ27587	circDDX3Y	chrY	12913062	12909360	+	ENSG00000067048	DDX3Y	down		down	hsa.miR.148a.3p	up	-0.340794	0.00158703	ENSG00000153558	FBXL2			-0.278155	0.00859146	0.186589	0.0569828	8.85889e-05	0	0	1	0
circ217	circATRNL1_9	chr10	115315736	115120185	+	ENSG00000107518	ATRNL1	down	down_turquoise	down	hsa.miR.130b.5p	up	-0.298159	0.00520265	ENSG00000159256	MORC3			-0.324263	0.00266055	0.187454	0.0561341	8.85937e-05	0	0	1	0
circ246	circATRNL1_11	chr10	115469329	115120185	+	ENSG00000107518	ATRNL1	down	down_turquoise	down	hsa.miR.107	up	-0.399377	0.00023242	ENSG00000047315	POLR2B			-0.232599	0.0239417	0.128318	0.139648	8.86004e-05	0	0	1	0
circ246	circATRNL1_11	chr10	115469329	115120185	+	ENSG00000107518	ATRNL1	down	down_turquoise	down	hsa.miR.148a.3p	up	-0.358576	0.000919439	ENSG00000132872	SYT4			-0.274607	0.00935793	0.15806	0.0908451	8.90518e-05	0	0	1	0
circ17709	circSLC4A7_1	chr3	27379249	27424152	-	ENSG00000033867	SLC4A7	down		down	hsa.P2.can246.m	up	-0.286893	0.00692985	ENSG00000151012	SLC7A11		1	-0.358355	0.000983394	0.142267	0.11494	8.92155e-05	0	0	0	1
circ246	circATRNL1_11	chr10	115469329	115120185	+	ENSG00000107518	ATRNL1	down	down_turquoise	down	hsa.miR.107	up	-0.399377	0.00023242	ENSG00000085788	DDHD2	1		-0.237535	0.0216232	0.119818	0.15632	8.94449e-05	0	1	1	0
circ217	circATRNL1_9	chr10	115315736	115120185	+	ENSG00000107518	ATRNL1	down	down_turquoise	down	hsa.miR.130b.5p	up	-0.298159	0.00520265	ENSG00000111530	CAND1			-0.316642	0.00327745	0.198449	0.0461812	8.96269e-05	0	0	1	0
circ206	circATRNL1_6	chr10	115268444	115120185	+	ENSG00000107518	ATRNL1	down		down	hsa.miR.363.3p	up	-0.317642	0.00308697	ENSG00000133193	FAM104A			-0.351876	0.00119775	0.0943043	0.213714	8.9897e-05	0	0	1	0
circ206	circATRNL1_6	chr10	115268444	115120185	+	ENSG00000107518	ATRNL1	down		down	hsa.miR.363.3p	up	-0.317642	0.00308697	ENSG00000182903	ZNF721			-0.368228	0.000722733	0.0442996	0.354892	9.00543e-05	0	0	1	0
circ206	circATRNL1_6	chr10	115268444	115120185	+	ENSG00000107518	ATRNL1	down		down	hsa.let.7g.3p	up	-0.414378	0.000133887	ENSG00000143013	LMO4			-0.204739	0.0411716	0.126009	0.144054	9.02803e-05	0	0	0	1
circ217	circATRNL1_9	chr10	115315736	115120185	+	ENSG00000107518	ATRNL1	down	down_turquoise	down	hsa.miR.130b.5p	up	-0.298159	0.00520265	ENSG00000047932	GOPC			-0.339658	0.00171928	0.159458	0.0889034	9.03939e-05	0	0	1	0
circ246	circATRNL1_11	chr10	115469329	115120185	+	ENSG00000107518	ATRNL1	down	down_turquoise	down	hsa.miR.107	up	-0.399377	0.00023242	ENSG00000162368	CMPK1			-0.235376	0.0226135	0.122162	0.151598	9.05462e-05	0	0	1	0
circ206	circATRNL1_6	chr10	115268444	115120185	+	ENSG00000107518	ATRNL1	down		down	hsa.let.7g.3p	up	-0.414378	0.000133887	ENSG00000137288	UQCC2			-0.228125	0.0262167	0.0888019	0.2275	9.07209e-05	0	0	1	0
circ206	circATRNL1_6	chr10	115268444	115120185	+	ENSG00000107518	ATRNL1	down		down	hsa.miR.363.3p	up	-0.317642	0.00308697	ENSG00000168036	CTNNB1			-0.30572	0.0043814	0.184384	0.0591897	9.09193e-05	0	0	1	0
circ206	circATRNL1_6	chr10	115268444	115120185	+	ENSG00000107518	ATRNL1	down		down	hsa.let.7g.3p	up	-0.414378	0.000133887	ENSG00000125629	INSIG2			-0.200019	0.0448901	0.131714	0.133329	9.09961e-05	0	0	1	0
circ20873	circPARP8	chr5	50763242	50750151	+	ENSG00000151883	PARP8	down		down	hsa.miR.363.3p	up	-0.202403	0.0429616	ENSG00000065883	CDK13			-0.445977	4.54827e-05	0.0270361	0.410192	9.10142e-05	1	0	1	0
circ217	circATRNL1_9	chr10	115315736	115120185	+	ENSG00000107518	ATRNL1	down	down_turquoise	down	hsa.miR.130b.5p	up	-0.298159	0.00520265	ENSG00000001629	ANKIB1			-0.339504	0.001727	0.159021	0.0895071	9.12802e-05	0	0	1	0
circ5511	circARID1A	chr1	26732792	26729651	+	ENSG00000117713	ARID1A	up		up	hsa.miR.204.3p	down	-0.37186	0.000599038	ENSG00000124164	VAPB			-0.252653	0.0156532	0.161664	0.0859024	9.14058e-05	0	0	0	1
circ246	circATRNL1_11	chr10	115469329	115120185	+	ENSG00000107518	ATRNL1	down	down_turquoise	down	hsa.miR.107	up	-0.399377	0.00023242	ENSG00000170035	UBE2E3			-0.212236	0.0357749	0.153849	0.0968781	9.14084e-05	0	0	1	0
circ217	circATRNL1_9	chr10	115315736	115120185	+	ENSG00000107518	ATRNL1	down	down_turquoise	down	hsa.miR.130b.5p	up	-0.298159	0.00520265	ENSG00000138814	PPP3CA	1		-0.323676	0.00270405	0.18624	0.0573279	9.15049e-05	0	1	1	0
circ27587	circDDX3Y	chrY	12913062	12909360	+	ENSG00000067048	DDX3Y	down		down	hsa.miR.148a.3p	up	-0.340794	0.00158703	ENSG00000102081	FMR1			-0.225273	0.0276683	0.244935	0.018375	9.15393e-05	1	0	1	0
circ246	circATRNL1_11	chr10	115469329	115120185	+	ENSG00000107518	ATRNL1	down	down_turquoise	down	hsa.miR.107	up	-0.399377	0.00023242	ENSG00000011295	TTC19	1		-0.232476	0.0240022	0.125633	0.14478	9.16193e-05	0	1	1	0
circ246	circATRNL1_11	chr10	115469329	115120185	+	ENSG00000107518	ATRNL1	down	down_turquoise	down	hsa.miR.107	up	-0.399377	0.00023242	ENSG00000001561	ENPP4			-0.234975	0.0228015	0.12153	0.152863	9.18585e-05	0	0	1	0
circ206	circATRNL1_6	chr10	115268444	115120185	+	ENSG00000107518	ATRNL1	down		down	hsa.miR.148a.3p	up	-0.332569	0.00202179	ENSG00000157404	KIT			-0.297747	0.00525847	0.169031	0.0764186	9.20894e-05	1	0	1	0
circ217	circATRNL1_9	chr10	115315736	115120185	+	ENSG00000107518	ATRNL1	down	down_turquoise	down	hsa.miR.130b.5p	up	-0.298159	0.00520265	ENSG00000124356	STAMBP			-0.350858	0.00123501	0.135251	0.126957	9.24135e-05	0	0	1	0
circ5511	circARID1A	chr1	26732792	26729651	+	ENSG00000117713	ARID1A	up		up	hsa.miR.204.3p	down	-0.37186	0.000599038	ENSG00000145375	SPATA5			-0.279896	0.00837094	0.116579	0.162996	9.25713e-05	0	0	0	1
circ246	circATRNL1_11	chr10	115469329	115120185	+	ENSG00000107518	ATRNL1	down	down_turquoise	down	hsa.miR.148a.3p	up	-0.358576	0.000919439	ENSG00000123178	SPRYD7			-0.254414	0.0149251	0.18373	0.0598575	9.29701e-05	0	0	1	0
circ246	circATRNL1_11	chr10	115469329	115120185	+	ENSG00000107518	ATRNL1	down	down_turquoise	down	hsa.miR.107	up	-0.399377	0.00023242	ENSG00000117868	ESYT2			-0.221986	0.0296256	0.139641	0.119342	9.30027e-05	0	0	1	0
circ206	circATRNL1_6	chr10	115268444	115120185	+	ENSG00000107518	ATRNL1	down		down	hsa.miR.148a.3p	up	-0.332569	0.00202179	ENSG00000186047	DLEU7			-0.250156	0.0164006	0.230695	0.0247876	9.30201e-05	0	0	0	1
circ246	circATRNL1_11	chr10	115469329	115120185	+	ENSG00000107518	ATRNL1	down	down_turquoise	down	hsa.miR.107	up	-0.399377	0.00023242	ENSG00000133731	IMPA1			-0.233926	0.0232993	0.121962	0.151998	9.31363e-05	0	0	1	0
circ27587	circDDX3Y	chrY	12913062	12909360	+	ENSG00000067048	DDX3Y	down		down	hsa.miR.148a.3p	up	-0.340794	0.00158703	ENSG00000118276	B4GALT6			-0.257947	0.0137872	0.209433	0.0376784	9.32666e-05	0	0	1	0
circ246	circATRNL1_11	chr10	115469329	115120185	+	ENSG00000107518	ATRNL1	down	down_turquoise	down	hsa.miR.363.3p	up	-0.222003	0.0295342	ENSG00000071189	SNX13			-0.40448	0.000215174	0.133516	0.130056	9.34703e-05	0	0	1	0
circ27587	circDDX3Y	chrY	12913062	12909360	+	ENSG00000067048	DDX3Y	down		down	hsa.miR.148a.3p	up	-0.340794	0.00158703	ENSG00000186952	TMEM232			-0.227572	0.0264153	0.241616	0.0197302	9.35313e-05	0	0	1	0
circ21473	circATG5	chr6	106248150	106308491	-	ENSG00000057663	ATG5	down	down_turquoise	down	hsa.miR.450b.5p	up	-0.202514	0.0428739	ENSG00000150867	PIP4K2A			-0.41932	0.000126095	0.121421	0.15308	9.3576e-05	0	0	1	0
circ5511	circARID1A	chr1	26732792	26729651	+	ENSG00000117713	ARID1A	up		up	hsa.miR.204.3p	down	-0.37186	0.000599038	ENSG00000155189	AGPAT5			-0.286067	0.00720632	0.102986	0.192963	9.41061e-05	0	0	0	1
circ219	circATRNL1_10	chr10	115315736	115215697	+	ENSG00000107518	ATRNL1		down_turquoise	down	hsa.miR.708.5p	up	-0.199181	0.0455711	ENSG00000185022	MAFF		1	-0.284092	0.00756269	0.326199	0.00242812	9.44817e-05	0	0	0	1
circ27587	circDDX3Y	chrY	12913062	12909360	+	ENSG00000067048	DDX3Y	down		down	hsa.miR.148a.3p	up	-0.340794	0.00158703	ENSG00000196792	STRN3			-0.197367	0.0470944	0.266883	0.0112309	9.47338e-05	0	0	1	0
circ246	circATRNL1_11	chr10	115469329	115120185	+	ENSG00000107518	ATRNL1	down	down_turquoise	down	hsa.miR.708.5p	up	-0.280353	0.00814435	ENSG00000168884	TNIP2		1	-0.360268	0.000927091	0.144543	0.111218	9.47686e-05	1	0	1	0
circ7886	circVRK1	chr14	96860735	96833467	+	ENSG00000100749	VRK1		down_turquoise	down	hsa.miR.450b.5p	up	-0.273195	0.00967881	ENSG00000172817	CYP7B1			-0.381032	0.000478125	0.108016	0.181509	9.4789e-05	0	0	0	1
circ206	circATRNL1_6	chr10	115268444	115120185	+	ENSG00000107518	ATRNL1	down		down	hsa.miR.363.3p	up	-0.317642	0.00308697	ENSG00000109920	FNBP4			-0.333333	0.00206224	0.132416	0.132049	9.48544e-05	0	0	1	0
circ16286	circZNF638_2	chr2	71427414	71426460	+	ENSG00000075292	ZNF638	down		down	hsa.miR.766.3p	up	-0.311524	0.00365004	ENSG00000067955	CBFB		1	-0.326361	0.00250991	0.157331	0.09187	9.49536e-05	0	0	1	0
circ5511	circARID1A	chr1	26732792	26729651	+	ENSG00000117713	ARID1A	up		up	hsa.miR.204.3p	down	-0.37186	0.000599038	ENSG00000148120	C9orf3			-0.315994	0.00333532	0.0236303	0.42135	9.49733e-05	0	0	0	1
circ27587	circDDX3Y	chrY	12913062	12909360	+	ENSG00000067048	DDX3Y	down		down	hsa.miR.148a.3p	up	-0.340794	0.00158703	ENSG00000138604	GLCE			-0.279235	0.00836915	0.180048	0.0637208	9.54131e-05	0	0	1	0
circ206	circATRNL1_6	chr10	115268444	115120185	+	ENSG00000107518	ATRNL1	down		down	hsa.chr9.24118.m	up	-0.339495	0.0016496	ENSG00000109586	GALNT7			-0.318401	0.00312484	0.116002	0.164205	9.54218e-05	0	0	0	1
circ206	circATRNL1_6	chr10	115268444	115120185	+	ENSG00000107518	ATRNL1	down		down	hsa.chr9.24118.m	up	-0.339495	0.0016496	ENSG00000065413	ANKRD44			-0.269098	0.0108018	0.19687	0.0475184	9.54491e-05	0	0	0	1
circ206	circATRNL1_6	chr10	115268444	115120185	+	ENSG00000107518	ATRNL1	down		down	hsa.let.7g.3p	up	-0.414378	0.000133887	ENSG00000144136	SLC20A1			-0.224084	0.0284223	0.0907192	0.222641	9.54998e-05	0	0	0	1
circ246	circATRNL1_11	chr10	115469329	115120185	+	ENSG00000107518	ATRNL1	down	down_turquoise	down	hsa.miR.148a.3p	up	-0.358576	0.000919439	ENSG00000171189	GRIK1			-0.292456	0.00602341	0.121299	0.153327	9.56869e-05	0	0	0	1
circ202	circATRNL1_5	chr10	115241725	115120185	+	ENSG00000107518	ATRNL1	down		down	hsa.miR.363.3p	up	-0.209506	0.0376264	ENSG00000066739	ATG2B	1		-0.411792	0.00016584	0.130065	0.136373	9.5864e-05	0	1	1	0
circ8229	circMGA_1	chr15	41669958	41668828	+	ENSG00000174197	MGA		down_turquoise	down	hsa.miR.450b.5p	up	-0.221453	0.0298575	ENSG00000065809	FAM107B			-0.427095	9.44158e-05	0.0617322	0.301939	9.58845e-05	0	0	1	0
circ246	circATRNL1_11	chr10	115469329	115120185	+	ENSG00000107518	ATRNL1	down	down_turquoise	down	hsa.miR.130b.5p	up	-0.286115	0.00706556	ENSG00000011295	TTC19	1		-0.363692	0.000833511	0.125633	0.14478	9.60278e-05	0	1	0	0
circ206	circATRNL1_6	chr10	115268444	115120185	+	ENSG00000107518	ATRNL1	down		down	hsa.miR.363.3p	up	-0.317642	0.00308697	ENSG00000005810	MYCBP2			-0.338301	0.00178826	0.120522	0.154891	9.62631e-05	0	0	1	0
circ17709	circSLC4A7_1	chr3	27379249	27424152	-	ENSG00000033867	SLC4A7	down		down	hsa.miR.708.5p	up	-0.197115	0.0473089	ENSG00000185022	MAFF		1	-0.284092	0.00756269	0.326667	0.00239596	9.64762e-05	0	0	0	1
circ206	circATRNL1_6	chr10	115268444	115120185	+	ENSG00000107518	ATRNL1	down		down	hsa.miR.363.3p	up	-0.317642	0.00308697	ENSG00000133703	KRAS			-0.324293	0.00265828	0.148783	0.10451	9.65135e-05	1	0	1	0
circ206	circATRNL1_6	chr10	115268444	115120185	+	ENSG00000107518	ATRNL1	down		down	hsa.miR.363.3p	up	-0.317642	0.00308697	ENSG00000009307	CSDE1			-0.315315	0.0033969	0.16476	0.0818174	9.65461e-05	0	0	1	0
circ206	circATRNL1_6	chr10	115268444	115120185	+	ENSG00000107518	ATRNL1	down		down	hsa.miR.363.3p	up	-0.317642	0.00308697	ENSG00000186063	AIDA			-0.241577	0.0198667	0.257287	0.0139939	9.65725e-05	0	0	1	0
circ206	circATRNL1_6	chr10	115268444	115120185	+	ENSG00000107518	ATRNL1	down		down	hsa.miR.148a.3p	up	-0.332569	0.00202179	ENSG00000134247	PTGFRN			-0.306864	0.00413757	0.149983	0.102665	9.66309e-05	0	0	1	0
circ246	circATRNL1_11	chr10	115469329	115120185	+	ENSG00000107518	ATRNL1	down	down_turquoise	down	hsa.miR.107	up	-0.399377	0.00023242	ENSG00000122873	CISD1			-0.228341	0.026103	0.127269	0.141639	9.6678e-05	0	0	1	0
circ619	circZMYND11_2	chr10	249088	179994	+	ENSG00000015171	ZMYND11		down_turquoise	down	hsa.miR.708.5p	up	-0.265587	0.0115747	ENSG00000026508	CD44			-0.413921	0.000153569	0.00487563	0.483672	9.67204e-05	1	0	1	0
circ206	circATRNL1_6	chr10	115268444	115120185	+	ENSG00000107518	ATRNL1	down		down	hsa.miR.363.3p	up	-0.317642	0.00308697	ENSG00000156642	NPTN			-0.350734	0.0012396	0.0899086	0.224688	9.67262e-05	0	0	1	0
circ619	circZMYND11_2	chr10	249088	179994	+	ENSG00000015171	ZMYND11		down_turquoise	down	hsa.miR.708.5p	up	-0.265587	0.0115747	ENSG00000149289	ZC3H12C			-0.383099	0.000446608	0.114976	0.166369	9.67482e-05	0	0	1	0
circ27587	circDDX3Y	chrY	12913062	12909360	+	ENSG00000067048	DDX3Y	down		down	hsa.miR.148a.3p	up	-0.340794	0.00158703	ENSG00000213047	DENND1B			-0.257438	0.0139465	0.207741	0.0389	9.68433e-05	0	0	1	0
circ246	circATRNL1_11	chr10	115469329	115120185	+	ENSG00000107518	ATRNL1	down	down_turquoise	down	hsa.miR.107	up	-0.399377	0.00023242	ENSG00000181061	HIGD1A			-0.201808	0.0434504	0.162133	0.0852751	9.68603e-05	0	0	1	0
circ246	circATRNL1_11	chr10	115469329	115120185	+	ENSG00000107518	ATRNL1	down	down_turquoise	down	hsa.miR.148a.3p	up	-0.358576	0.000919439	ENSG00000164332	UBLCP1			-0.248367	0.0170562	0.188651	0.0549769	9.69562e-05	0	0	1	0
circ206	circATRNL1_6	chr10	115268444	115120185	+	ENSG00000107518	ATRNL1	down		down	hsa.miR.363.3p	up	-0.317642	0.00308697	ENSG00000122912	SLC25A16			-0.30066	0.00499527	0.187642	0.0559513	9.70176e-05	0	0	1	0
circ246	circATRNL1_11	chr10	115469329	115120185	+	ENSG00000107518	ATRNL1	down	down_turquoise	down	hsa.miR.363.3p	up	-0.222003	0.0295342	ENSG00000066739	ATG2B	1		-0.411792	0.00016584	0.110423	0.176181	9.70312e-05	0	1	1	0
circ246	circATRNL1_11	chr10	115469329	115120185	+	ENSG00000107518	ATRNL1	down	down_turquoise	down	hsa.miR.148a.3p	up	-0.358576	0.000919439	ENSG00000196950	SLC39A10	1		-0.295495	0.00557307	0.113647	0.169196	9.74261e-05	0	1	1	0
circ20464	circPPP2R2B	chr5	146691128	146701142	-	ENSG00000156475	PPP2R2B	up		up	hsa.miR.204.3p	down	-0.260596	0.0129827	ENSG00000124275	MTRR			-0.405035	0.000211001	0.0566235	0.3171	9.75898e-05	0	0	0	1
circ5511	circARID1A	chr1	26732792	26729651	+	ENSG00000117713	ARID1A	up		up	hsa.miR.204.3p	down	-0.37186	0.000599038	ENSG00000132912	DCTN4			-0.272492	0.00997986	0.12525	0.145523	9.77186e-05	0	0	0	1
circ3518	circEIF4G3_1	chr1	20893517	20942330	-	ENSG00000075151	EIF4G3	down		down	hsa.miR.10a.5p	up	-0.230139	0.0250709	ENSG00000197603	C5orf42			-0.386925	0.000393222	0.159826	0.0883982	9.78634e-05	0	0	1	0
circ246	circATRNL1_11	chr10	115469329	115120185	+	ENSG00000107518	ATRNL1	down	down_turquoise	down	hsa.miR.130b.5p	up	-0.286115	0.00706556	ENSG00000115524	SF3B1			-0.375972	0.000563987	0.0921888	0.218957	9.79657e-05	0	0	1	0
circ246	circATRNL1_11	chr10	115469329	115120185	+	ENSG00000107518	ATRNL1	down	down_turquoise	down	hsa.miR.107	up	-0.399377	0.00023242	ENSG00000154620	TMSB4Y	1		-0.250555	0.0163877	0.0879774	0.229607	9.81619e-05	0	1	0	0
circ206	circATRNL1_6	chr10	115268444	115120185	+	ENSG00000107518	ATRNL1	down		down	hsa.let.7g.3p	up	-0.414378	0.000133887	ENSG00000177599	ZNF491			-0.205294	0.0407508	0.117873	0.160309	9.8173e-05	0	0	0	1
circ217	circATRNL1_9	chr10	115315736	115120185	+	ENSG00000107518	ATRNL1	down	down_turquoise	down	hsa.miR.130b.5p	up	-0.298159	0.00520265	ENSG00000197780	TAF13			-0.237566	0.0216093	0.282145	0.00779458	9.83349e-05	0	0	1	0
circ12207	circPPP4R1_1	chr18	9583117	9595102	-	ENSG00000154845	PPP4R1	up		up	hsa.P5.can399.m	down	-0.219488	0.0310373	ENSG00000105639	JAK3			-0.362893	0.000801521	0.212766	0.0353613	9.86628e-05	0	0	0	1
circ217	circATRNL1_9	chr10	115315736	115120185	+	ENSG00000107518	ATRNL1	down	down_turquoise	down	hsa.miR.130b.5p	up	-0.298159	0.00520265	ENSG00000067248	DHX29			-0.35709	0.0010223	0.115335	0.165609	9.87733e-05	0	0	1	0
circ27587	circDDX3Y	chrY	12913062	12909360	+	ENSG00000067048	DDX3Y	down		down	hsa.miR.148a.3p	up	-0.340794	0.00158703	ENSG00000135549	PKIB			-0.25372	0.0151578	0.21093	0.0366234	9.87913e-05	0	0	1	0
circ206	circATRNL1_6	chr10	115268444	115120185	+	ENSG00000107518	ATRNL1	down		down	hsa.miR.363.3p	up	-0.317642	0.00308697	ENSG00000075213	SEMA3A			-0.331636	0.00216408	0.132478	0.131935	9.88284e-05	0	0	1	0
circ5511	circARID1A	chr1	26732792	26729651	+	ENSG00000117713	ARID1A	up		up	hsa.miR.204.3p	down	-0.37186	0.000599038	ENSG00000173875	ZNF791			-0.278508	0.00865431	0.113165	0.170229	9.89376e-05	0	0	0	1
circ206	circATRNL1_6	chr10	115268444	115120185	+	ENSG00000107518	ATRNL1	down		down	hsa.miR.363.3p	up	-0.317642	0.00308697	ENSG00000133059	DSTYK			-0.318308	0.00313271	0.157652	0.0914176	9.90884e-05	0	0	1	0
circ246	circATRNL1_11	chr10	115469329	115120185	+	ENSG00000107518	ATRNL1	down	down_turquoise	down	hsa.miR.130b.5p	up	-0.286115	0.00706556	ENSG00000092148	HECTD1			-0.346353	0.00141269	0.159572	0.0887474	9.926e-05	0	0	1	0
circ5511	circARID1A	chr1	26732792	26729651	+	ENSG00000117713	ARID1A	up		up	hsa.miR.204.3p	down	-0.37186	0.000599038	ENSG00000163257	DCAF16			-0.294551	0.00583572	0.0787836	0.253813	9.9401e-05	0	0	0	1
circ217	circATRNL1_9	chr10	115315736	115120185	+	ENSG00000107518	ATRNL1	down	down_turquoise	down	hsa.miR.130b.5p	up	-0.298159	0.00520265	ENSG00000162623	TYW3			-0.325281	0.00258647	0.177869	0.066096	9.96088e-05	0	0	1	0
circ27587	circDDX3Y	chrY	12913062	12909360	+	ENSG00000067048	DDX3Y	down		down	hsa.miR.148a.3p	up	-0.340794	0.00158703	ENSG00000100934	SEC23A	1		-0.228405	0.0259728	0.237336	0.021599	9.96941e-05	0	1	1	0
circ246	circATRNL1_11	chr10	115469329	115120185	+	ENSG00000107518	ATRNL1	down	down_turquoise	down	hsa.miR.130b.5p	up	-0.286115	0.00706556	ENSG00000163714	U2SURP			-0.332685	0.00210061	0.183591	0.0599999	9.97151e-05	0	0	0	1
circ246	circATRNL1_11	chr10	115469329	115120185	+	ENSG00000107518	ATRNL1	down	down_turquoise	down	hsa.miR.107	up	-0.399377	0.00023242	ENSG00000103769	RAB11A			-0.225873	0.0274277	0.128194	0.139881	9.98304e-05	0	0	1	0
circ246	circATRNL1_11	chr10	115469329	115120185	+	ENSG00000107518	ATRNL1	down	down_turquoise	down	hsa.miR.708.5p	up	-0.280353	0.00814435	ENSG00000124762	CDKN1A		1	-0.386092	0.000404324	0.0719072	0.272737	0.000100452	0	0	1	0
circ5511	circARID1A	chr1	26732792	26729651	+	ENSG00000117713	ARID1A	up		up	hsa.miR.204.3p	down	-0.37186	0.000599038	ENSG00000125249	RAP2A			-0.270332	0.0104965	0.126584	0.142948	0.000100521	0	0	0	1
circ246	circATRNL1_11	chr10	115469329	115120185	+	ENSG00000107518	ATRNL1	down	down_turquoise	down	hsa.miR.130b.5p	up	-0.286115	0.00706556	ENSG00000079950	STX7			-0.357491	0.00100982	0.135722	0.126124	0.000100624	0	0	1	0
circ206	circATRNL1_6	chr10	115268444	115120185	+	ENSG00000107518	ATRNL1	down		down	hsa.miR.363.3p	up	-0.317642	0.00308697	ENSG00000215712	TMEM242			-0.352308	0.00118225	0.0814758	0.246592	0.00010063	0	0	1	0
circ27587	circDDX3Y	chrY	12913062	12909360	+	ENSG00000067048	DDX3Y	down		down	hsa.miR.148a.3p	up	-0.340794	0.00158703	ENSG00000156411	C14orf2			-0.267727	0.011012	0.192349	0.0515163	0.000100665	0	0	1	0
circ246	circATRNL1_11	chr10	115469329	115120185	+	ENSG00000107518	ATRNL1	down	down_turquoise	down	hsa.miR.107	up	-0.399377	0.00023242	ENSG00000153310	FAM49B	1		-0.21418	0.0344731	0.14379	0.112439	0.00010072	0	1	1	0
circ246	circATRNL1_11	chr10	115469329	115120185	+	ENSG00000107518	ATRNL1	down	down_turquoise	down	hsa.miR.107	up	-0.399377	0.00023242	ENSG00000114120	SLC25A36	1		-0.221461	0.0299329	0.133779	0.129584	0.000100782	0	1	1	0
circ246	circATRNL1_11	chr10	115469329	115120185	+	ENSG00000107518	ATRNL1	down	down_turquoise	down	hsa.miR.130b.5p	up	-0.286115	0.00706556	ENSG00000106460	TMEM106B			-0.361132	0.000902631	0.127346	0.141492	0.000100865	0	0	1	0
circ27587	circDDX3Y	chrY	12913062	12909360	+	ENSG00000067048	DDX3Y	down		down	hsa.miR.148a.3p	up	-0.340794	0.00158703	ENSG00000160131	VMA21			-0.214521	0.0341885	0.249474	0.0166479	0.000100953	0	0	1	0
circ17709	circSLC4A7_1	chr3	27379249	27424152	-	ENSG00000033867	SLC4A7	down		down	hsa.miR.629.5p	up	-0.197751	0.0467681	ENSG00000188647	PTAR1		1	-0.439189	5.94112e-05	0.0536528	0.326059	0.000101213	0	0	1	0
circ206	circATRNL1_6	chr10	115268444	115120185	+	ENSG00000107518	ATRNL1	down		down	hsa.miR.363.3p	up	-0.317642	0.00308697	ENSG00000051382	PIK3CB	1		-0.335184	0.00195605	0.122642	0.150643	0.000101566	0	0	0	1
circ246	circATRNL1_11	chr10	115469329	115120185	+	ENSG00000107518	ATRNL1	down	down_turquoise	down	hsa.miR.107	up	-0.399377	0.00023242	ENSG00000065613	SLK			-0.216617	0.0328951	0.139857	0.118976	0.000101567	0	0	1	0
circ206	circATRNL1_6	chr10	115268444	115120185	+	ENSG00000107518	ATRNL1	down		down	hsa.let.7g.3p	up	-0.414378	0.000133887	ENSG00000155886	SLC24A2	1		-0.244971	0.0184853	0.0398884	0.368791	0.000101868	1	1	0	0
circ3279	circFAT3	chr11	92355404	92352096	+	ENSG00000165323	FAT3	down	down_turquoise	down	hsa.miR.708.5p	up	-0.276348	0.00911154	ENSG00000106785	TRIM14			-0.292114	0.00620401	0.250755	0.0161858	0.000102082	0	0	1	0
circ246	circATRNL1_11	chr10	115469329	115120185	+	ENSG00000107518	ATRNL1	down	down_turquoise	down	hsa.miR.363.3p	up	-0.222003	0.0295342	ENSG00000141040	ZNF287			-0.35493	0.00109195	0.223977	0.0283957	0.00010216	0	0	1	0
circ217	circATRNL1_9	chr10	115315736	115120185	+	ENSG00000107518	ATRNL1	down	down_turquoise	down	hsa.miR.130b.5p	up	-0.298159	0.00520265	ENSG00000143951	WDPCP			-0.344903	0.00147459	0.139494	0.119592	0.000102326	0	0	1	0
circ27587	circDDX3Y	chrY	12913062	12909360	+	ENSG00000067048	DDX3Y	down		down	hsa.miR.148a.3p	up	-0.340794	0.00158703	ENSG00000143013	LMO4			-0.207687	0.0389392	0.254632	0.0148527	0.000102363	0	0	1	0
circ27587	circDDX3Y	chrY	12913062	12909360	+	ENSG00000067048	DDX3Y	down		down	hsa.miR.148a.3p	up	-0.340794	0.00158703	ENSG00000169139	UBE2V2			-0.247426	0.0174097	0.216006	0.0332206	0.000102364	0	0	1	0
circ8229	circMGA_1	chr15	41669958	41668828	+	ENSG00000174197	MGA		down_turquoise	down	hsa.miR.450b.5p	up	-0.221453	0.0298575	ENSG00000164176	EDIL3			-0.419999	0.000122982	0.0801593	0.250109	0.000102413	0	0	1	0
circ246	circATRNL1_11	chr10	115469329	115120185	+	ENSG00000107518	ATRNL1	down	down_turquoise	down	hsa.miR.107	up	-0.399377	0.00023242	ENSG00000198642	KLHL9			-0.211928	0.0359852	0.145395	0.109846	0.000102445	0	0	1	0
circ246	circATRNL1_11	chr10	115469329	115120185	+	ENSG00000107518	ATRNL1	down	down_turquoise	down	hsa.miR.148a.3p	up	-0.358576	0.000919439	ENSG00000134265	NAPG	1		-0.271183	0.0101525	0.152522	0.098837	0.000102821	0	1	1	0
circ246	circATRNL1_11	chr10	115469329	115120185	+	ENSG00000107518	ATRNL1	down	down_turquoise	down	hsa.miR.107	up	-0.399377	0.00023242	ENSG00000114209	PDCD10			-0.203505	0.0421192	0.155561	0.0943913	0.000102958	0	0	1	0
circ5511	circARID1A	chr1	26732792	26729651	+	ENSG00000117713	ARID1A	up		up	hsa.miR.204.3p	down	-0.37186	0.000599038	ENSG00000139323	POC1B			-0.2898	0.00657221	0.0857869	0.235256	0.000103168	0	0	0	1
circ7886	circVRK1	chr14	96860735	96833467	+	ENSG00000100749	VRK1		down_turquoise	down	hsa.miR.450b.5p	up	-0.273195	0.00967881	ENSG00000166147	FBN1			-0.381896	0.000464715	0.0974338	0.206091	0.000103243	1	0	1	0
circ3518	circEIF4G3_1	chr1	20893517	20942330	-	ENSG00000075151	EIF4G3	down		down	hsa.miR.3938	up	-0.295345	0.0055946	ENSG00000139651	ZNF740	1		-0.347711	0.00135687	0.137988	0.122171	0.000103286	0	1	0	0
circ3279	circFAT3	chr11	92355404	92352096	+	ENSG00000165323	FAT3	down	down_turquoise	down	hsa.miR.708.5p	up	-0.276348	0.00911154	ENSG00000124762	CDKN1A		1	-0.386092	0.000404324	0.0792446	0.252568	0.000103579	0	0	1	0
circ206	circATRNL1_6	chr10	115268444	115120185	+	ENSG00000107518	ATRNL1	down		down	hsa.miR.148a.3p	up	-0.332569	0.00202179	ENSG00000164405	UQCRQ			-0.262451	0.0124433	0.2104	0.036994	0.0001036	0	0	1	0
circ206	circATRNL1_6	chr10	115268444	115120185	+	ENSG00000107518	ATRNL1	down		down	hsa.let.7g.3p	up	-0.414378	0.000133887	ENSG00000113580	NR3C1			-0.218993	0.0314139	0.0911088	0.221661	0.000103755	0	0	1	0
circ206	circATRNL1_6	chr10	115268444	115120185	+	ENSG00000107518	ATRNL1	down		down	hsa.miR.363.3p	up	-0.317642	0.00308697	ENSG00000070831	CDC42			-0.287178	0.00701234	0.20217	0.0431464	0.000103919	0	0	1	0
circ246	circATRNL1_11	chr10	115469329	115120185	+	ENSG00000107518	ATRNL1	down	down_turquoise	down	hsa.miR.363.3p	up	-0.222003	0.0295342	ENSG00000147180	ZNF711			-0.416389	0.00014039	0.0893349	0.226143	0.000104273	0	0	1	0
circ27587	circDDX3Y	chrY	12913062	12909360	+	ENSG00000067048	DDX3Y	down		down	hsa.miR.148a.3p	up	-0.340794	0.00158703	ENSG00000116459	ATP5F1			-0.230642	0.0248146	0.232651	0.0238109	0.000104277	0	0	1	0
circ206	circATRNL1_6	chr10	115268444	115120185	+	ENSG00000107518	ATRNL1	down		down	hsa.miR.363.3p	up	-0.317642	0.00308697	ENSG00000139910	NOVA1	1		-0.339041	0.00175034	0.111575	0.173664	0.000104339	0	1	1	0
circ217	circATRNL1_9	chr10	115315736	115120185	+	ENSG00000107518	ATRNL1	down	down_turquoise	down	hsa.chr5.14497.s	up	-0.251479	0.0159295	ENSG00000163577	EIF5A2	1		-0.34995	0.00120285	0.195081	0.0490704	0.00010452	0	1	0	0
circ5511	circARID1A	chr1	26732792	26729651	+	ENSG00000117713	ARID1A	up		up	hsa.miR.204.3p	down	-0.37186	0.000599038	ENSG00000004961	HCCS			-0.243305	0.0191531	0.16465	0.0819598	0.000104533	0	0	0	1
circ27587	circDDX3Y	chrY	12913062	12909360	+	ENSG00000067048	DDX3Y	down		down	hsa.miR.148a.3p	up	-0.340794	0.00158703	ENSG00000097046	CDC7			-0.244186	0.0186737	0.218316	0.0317587	0.000104613	0	0	1	0
circ15905	circNRXN1_3	chr2	50472298	50620183	-	ENSG00000179915	NRXN1	down		down	hsa.miR.708.5p	up	-0.216171	0.0331142	ENSG00000185033	SEMA4B			-0.29813	0.00532953	0.297174	0.00533704	0.000104681	0	0	0	1
circ5511	circARID1A	chr1	26732792	26729651	+	ENSG00000117713	ARID1A	up		up	hsa.miR.204.3p	down	-0.37186	0.000599038	ENSG00000065361	ERBB3			-0.254073	0.0151723	0.149166	0.103918	0.00010493	0	0	0	1
circ206	circATRNL1_6	chr10	115268444	115120185	+	ENSG00000107518	ATRNL1	down		down	hsa.miR.363.3p	up	-0.317642	0.00308697	ENSG00000109332	UBE2D3			-0.339288	0.00173786	0.110375	0.176286	0.000105049	0	0	1	0
circ246	circATRNL1_11	chr10	115469329	115120185	+	ENSG00000107518	ATRNL1	down	down_turquoise	down	hsa.miR.148a.3p	up	-0.358576	0.000919439	ENSG00000138078	PREPL	1		-0.25662	0.0142056	0.172314	0.072452	0.000105106	0	1	1	0
circ5511	circARID1A	chr1	26732792	26729651	+	ENSG00000117713	ARID1A	up		up	hsa.miR.204.3p	down	-0.37186	0.000599038	ENSG00000197043	ANXA6	1		-0.268758	0.0108871	0.125361	0.145307	0.000105235	0	0	1	0
circ217	circATRNL1_9	chr10	115315736	115120185	+	ENSG00000107518	ATRNL1	down	down_turquoise	down	hsa.miR.130b.5p	up	-0.298159	0.00520265	ENSG00000105810	CDK6			-0.356535	0.00103982	0.11085	0.175245	0.000105272	0	0	1	0
circ27587	circDDX3Y	chrY	12913062	12909360	+	ENSG00000067048	DDX3Y	down		down	hsa.chr5.14497.s	up	-0.242594	0.0193225	ENSG00000152409	JMY			-0.286085	0.00707098	0.286815	0.00694344	0.000105333	0	0	0	1
circ27587	circDDX3Y	chrY	12913062	12909360	+	ENSG00000067048	DDX3Y	down		down	hsa.miR.148a.3p	up	-0.340794	0.00158703	ENSG00000111707	SUDS3			-0.208427	0.0384003	0.252338	0.01563	0.000105704	0	0	1	0
circ27587	circDDX3Y	chrY	12913062	12909360	+	ENSG00000067048	DDX3Y	down		down	hsa.chr5.14497.s	up	-0.242594	0.0193225	ENSG00000064651	SLC12A2	1		-0.409682	0.000159563	0.0591429	0.309584	0.000105893	0	1	0	0
circ5511	circARID1A	chr1	26732792	26729651	+	ENSG00000117713	ARID1A	up		up	hsa.miR.204.3p	down	-0.37186	0.000599038	ENSG00000147852	VLDLR			-0.274312	0.00956155	0.114753	0.16684	0.000106	1	0	0	0
circ246	circATRNL1_11	chr10	115469329	115120185	+	ENSG00000107518	ATRNL1	down	down_turquoise	down	hsa.miR.107	up	-0.399377	0.00023242	ENSG00000138095	LRPPRC			-0.221338	0.0300056	0.129444	0.137531	0.000106337	1	0	1	0
circ27587	circDDX3Y	chrY	12913062	12909360	+	ENSG00000067048	DDX3Y	down		down	hsa.miR.148a.3p	up	-0.340794	0.00158703	ENSG00000186047	DLEU7			-0.250156	0.0164006	0.210604	0.0368507	0.00010634	0	0	0	1
circ246	circATRNL1_11	chr10	115469329	115120185	+	ENSG00000107518	ATRNL1	down	down_turquoise	down	hsa.miR.363.3p	up	-0.222003	0.0295342	ENSG00000196387	ZNF140			-0.393928	0.000310307	0.148557	0.104859	0.000106517	0	0	1	0
circ217	circATRNL1_9	chr10	115315736	115120185	+	ENSG00000107518	ATRNL1	down	down_turquoise	down	hsa.miR.130b.5p	up	-0.298159	0.00520265	ENSG00000149311	ATM			-0.3723	0.00063481	0.0653993	0.291257	0.000106607	0	0	1	0
circ206	circATRNL1_6	chr10	115268444	115120185	+	ENSG00000107518	ATRNL1	down		down	hsa.miR.363.3p	up	-0.317642	0.00308697	ENSG00000024526	DEPDC1			-0.259379	0.0134832	0.234015	0.0231484	0.000106756	0	0	1	0
circ246	circATRNL1_11	chr10	115469329	115120185	+	ENSG00000107518	ATRNL1	down	down_turquoise	down	hsa.miR.107	up	-0.399377	0.00023242	ENSG00000121741	ZMYM2			-0.220443	0.0305367	0.130292	0.135951	0.00010689	0	0	1	0
circ246	circATRNL1_11	chr10	115469329	115120185	+	ENSG00000107518	ATRNL1	down	down_turquoise	down	hsa.miR.107	up	-0.399377	0.00023242	ENSG00000004897	CDC27			-0.210848	0.0367288	0.143343	0.113169	0.000107004	0	0	1	0
circ27587	circDDX3Y	chrY	12913062	12909360	+	ENSG00000067048	DDX3Y	down		down	hsa.chr5.14497.s	up	-0.242594	0.0193225	ENSG00000115145	STAM2			-0.341558	0.00155124	0.217535	0.032247	0.000107051	0	0	0	1
circ22526	circADGRB3_4	chr6	69063036	68993768	+	ENSG00000135298	ADGRB3	down		down	hsa.miR.107	up	-0.28433	0.0073857	ENSG00000116560	SFPQ			-0.383161	0.000445697	0.0644297	0.294064	0.000107188	0	0	1	0
circ202	circATRNL1_5	chr10	115241725	115120185	+	ENSG00000107518	ATRNL1	down		down	hsa.miR.363.3p	up	-0.209506	0.0376264	ENSG00000104427	ZC2HC1A			-0.412131	0.000163825	0.119433	0.157103	0.000107228	0	0	1	0
circ219	circATRNL1_10	chr10	115315736	115215697	+	ENSG00000107518	ATRNL1		down_turquoise	down	hsa.miR.708.5p	up	-0.199181	0.0455711	ENSG00000106511	MEOX2			-0.261076	0.0129779	0.339736	0.00163784	0.000107251	0	0	0	1
circ27587	circDDX3Y	chrY	12913062	12909360	+	ENSG00000067048	DDX3Y	down		down	hsa.miR.148a.3p	up	-0.340794	0.00158703	ENSG00000108946	PRKAR1A	1		-0.237229	0.0216478	0.22432	0.0282019	0.000107275	0	1	1	0
circ246	circATRNL1_11	chr10	115469329	115120185	+	ENSG00000107518	ATRNL1	down	down_turquoise	down	hsa.miR.107	up	-0.399377	0.00023242	ENSG00000117533	VAMP4			-0.228835	0.0258444	0.117288	0.161521	0.000107401	0	0	1	0
circ206	circATRNL1_6	chr10	115268444	115120185	+	ENSG00000107518	ATRNL1	down		down	hsa.miR.363.3p	up	-0.317642	0.00308697	ENSG00000065413	ANKRD44			-0.289522	0.00661764	0.19687	0.0475184	0.00010745	0	0	1	0
circ246	circATRNL1_11	chr10	115469329	115120185	+	ENSG00000107518	ATRNL1	down	down_turquoise	down	hsa.miR.107	up	-0.399377	0.00023242	ENSG00000136531	SCN2A	1		-0.234234	0.0231519	0.108371	0.180717	0.000107614	1	1	1	0
circ206	circATRNL1_6	chr10	115268444	115120185	+	ENSG00000107518	ATRNL1	down		down	hsa.miR.363.3p	up	-0.317642	0.00308697	ENSG00000170786	SDR16C5			-0.346014	0.00142697	0.0913427	0.221074	0.000107748	0	0	0	1
circ5511	circARID1A	chr1	26732792	26729651	+	ENSG00000117713	ARID1A	up		up	hsa.miR.204.3p	down	-0.37186	0.000599038	ENSG00000159267	HLCS			-0.28039	0.00827214	0.101413	0.196629	0.000107798	0	0	1	0
circ27587	circDDX3Y	chrY	12913062	12909360	+	ENSG00000067048	DDX3Y	down		down	hsa.chr5.14497.s	up	-0.242594	0.0193225	ENSG00000037749	MFAP3			-0.267912	0.0109644	0.302857	0.00460141	0.000107845	0	0	0	1
circ21473	circATG5	chr6	106248150	106308491	-	ENSG00000057663	ATG5	down	down_turquoise	down	hsa.miR.450b.5p	up	-0.202514	0.0428739	ENSG00000135720	DYNC1LI2			-0.416636	0.000139131	0.116262	0.163659	0.000107979	0	0	1	0
circ5511	circARID1A	chr1	26732792	26729651	+	ENSG00000117713	ARID1A	up		up	hsa.miR.204.3p	down	-0.37186	0.000599038	ENSG00000115425	PECR			-0.299889	0.00509518	0.0556773	0.319942	0.000108006	1	0	0	0
circ246	circATRNL1_11	chr10	115469329	115120185	+	ENSG00000107518	ATRNL1	down	down_turquoise	down	hsa.miR.130b.5p	up	-0.286115	0.00706556	ENSG00000135972	MRPS9	1		-0.359743	0.000942232	0.12423	0.147513	0.000108534	0	0	1	0
circ5511	circARID1A	chr1	26732792	26729651	+	ENSG00000117713	ARID1A	up		up	hsa.miR.204.3p	down	-0.37186	0.000599038	ENSG00000120539	MASTL			-0.280112	0.00832759	0.101159	0.197225	0.000108708	0	0	0	1
circ246	circATRNL1_11	chr10	115469329	115120185	+	ENSG00000107518	ATRNL1	down	down_turquoise	down	hsa.miR.148a.3p	up	-0.358576	0.000919439	ENSG00000213047	DENND1B			-0.257438	0.0139465	0.168766	0.0767453	0.000108731	0	0	1	0
circ217	circATRNL1_9	chr10	115315736	115120185	+	ENSG00000107518	ATRNL1	down	down_turquoise	down	hsa.miR.130b.5p	up	-0.298159	0.00520265	ENSG00000093144	ECHDC1			-0.337498	0.00183018	0.149517	0.103379	0.000108754	0	0	0	1
circ246	circATRNL1_11	chr10	115469329	115120185	+	ENSG00000107518	ATRNL1	down	down_turquoise	down	hsa.miR.107	up	-0.399377	0.00023242	ENSG00000173482	PTPRM			-0.209706	0.0375284	0.143466	0.112967	0.000108849	0	0	1	0
circ27587	circDDX3Y	chrY	12913062	12909360	+	ENSG00000067048	DDX3Y	down		down	hsa.miR.148a.3p	up	-0.340794	0.00158703	ENSG00000156642	NPTN			-0.248506	0.0170045	0.21106	0.0365328	0.000108903	0	0	1	0
circ246	circATRNL1_11	chr10	115469329	115120185	+	ENSG00000107518	ATRNL1	down	down_turquoise	down	hsa.miR.130b.5p	up	-0.286115	0.00706556	ENSG00000181915	ADO			-0.360453	0.0009218	0.121977	0.151967	0.000109272	0	0	1	0
circ246	circATRNL1_11	chr10	115469329	115120185	+	ENSG00000107518	ATRNL1	down	down_turquoise	down	hsa.miR.107	up	-0.399377	0.00023242	ENSG00000010072	SPRTN			-0.226274	0.0272088	0.119679	0.156603	0.000109327	0	0	1	0
circ246	circATRNL1_11	chr10	115469329	115120185	+	ENSG00000107518	ATRNL1	down	down_turquoise	down	hsa.let.7g.3p	up	-0.219735	0.0308871	ENSG00000177182	CLVS1			-0.386986	0.000392411	0.164755	0.0818234	0.00010946	0	0	0	1
circ217	circATRNL1_9	chr10	115315736	115120185	+	ENSG00000107518	ATRNL1	down	down_turquoise	down	hsa.miR.130b.5p	up	-0.298159	0.00520265	ENSG00000081014	AP4E1			-0.36576	0.000781245	0.0824171	0.244092	0.000109498	0	0	1	0
circ206	circATRNL1_6	chr10	115268444	115120185	+	ENSG00000107518	ATRNL1	down		down	hsa.let.7g.3p	up	-0.414378	0.000133887	ENSG00000152413	HOMER1			-0.234481	0.0230346	0.0549615	0.3221	0.000109616	1	0	0	0
circ206	circATRNL1_6	chr10	115268444	115120185	+	ENSG00000107518	ATRNL1	down		down	hsa.chr9.24118.m	up	-0.339495	0.0016496	ENSG00000085511	MAP3K4			-0.296989	0.00548665	0.145447	0.109763	0.000109623	0	0	0	1
circ246	circATRNL1_11	chr10	115469329	115120185	+	ENSG00000107518	ATRNL1	down	down_turquoise	down	hsa.miR.363.3p	up	-0.222003	0.0295342	ENSG00000100934	SEC23A	1		-0.389023	0.000366481	0.15735	0.0918421	0.000109684	0	1	1	0
circ246	circATRNL1_11	chr10	115469329	115120185	+	ENSG00000107518	ATRNL1	down	down_turquoise	down	hsa.miR.107	up	-0.399377	0.00023242	ENSG00000058091	CDK14	1		-0.196594	0.0477506	0.158908	0.0896634	0.000109782	0	1	1	0
circ246	circATRNL1_11	chr10	115469329	115120185	+	ENSG00000107518	ATRNL1	down	down_turquoise	down	hsa.miR.107	up	-0.399377	0.00023242	ENSG00000104549	SQLE			-0.233	0.0237459	0.108556	0.180305	0.000109783	0	0	1	0
circ206	circATRNL1_6	chr10	115268444	115120185	+	ENSG00000107518	ATRNL1	down		down	hsa.miR.148a.3p	up	-0.332569	0.00202179	ENSG00000066382	MPPED2	1		-0.321951	0.00273773	0.108707	0.17997	0.000109882	0	1	1	0
circ15905	circNRXN1_3	chr2	50472298	50620183	-	ENSG00000179915	NRXN1	down		down	hsa.miR.629.5p	up	-0.30334	0.0045432	ENSG00000175215	CTDSP2			-0.263915	0.0121688	0.245703	0.0180727	0.000110168	0	0	1	0
circ27587	circDDX3Y	chrY	12913062	12909360	+	ENSG00000067048	DDX3Y	down		down	hsa.miR.148a.3p	up	-0.340794	0.00158703	ENSG00000152193	RNF219			-0.200282	0.0446654	0.256861	0.0141288	0.000110395	0	0	1	0
circ27587	circDDX3Y	chrY	12913062	12909360	+	ENSG00000067048	DDX3Y	down		down	hsa.miR.148a.3p	up	-0.340794	0.00158703	ENSG00000176204	LRRTM4			-0.256466	0.014255	0.200761	0.0442766	0.000110409	0	0	0	1
circ15905	circNRXN1_3	chr2	50472298	50620183	-	ENSG00000179915	NRXN1	down		down	hsa.miR.629.5p	up	-0.30334	0.0045432	ENSG00000026508	CD44			-0.362767	0.000857921	0.0774387	0.25746	0.000110584	1	0	1	0
circ206	circATRNL1_6	chr10	115268444	115120185	+	ENSG00000107518	ATRNL1	down		down	hsa.let.7g.3p	up	-0.414378	0.000133887	ENSG00000171208	NETO2			-0.220906	0.030261	0.0807743	0.248463	0.000110885	0	0	0	1
circ15905	circNRXN1_3	chr2	50472298	50620183	-	ENSG00000179915	NRXN1	down		down	hsa.miR.708.5p	up	-0.216171	0.0331142	ENSG00000148730	EIF4EBP2			-0.374522	0.000591054	0.192373	0.0514944	0.000111	1	0	1	0
circ246	circATRNL1_11	chr10	115469329	115120185	+	ENSG00000107518	ATRNL1	down	down_turquoise	down	hsa.miR.107	up	-0.399377	0.00023242	ENSG00000141367	CLTC			-0.200666	0.0443645	0.153247	0.0977629	0.000111018	0	0	1	0
circ246	circATRNL1_11	chr10	115469329	115120185	+	ENSG00000107518	ATRNL1	down	down_turquoise	down	hsa.miR.363.3p	up	-0.222003	0.0295342	ENSG00000107036	RIC1			-0.422652	0.000111479	0.0601325	0.306652	0.000111169	0	0	1	0
circ246	circATRNL1_11	chr10	115469329	115120185	+	ENSG00000107518	ATRNL1	down	down_turquoise	down	hsa.miR.148a.3p	up	-0.358576	0.000919439	ENSG00000107105	ELAVL2			-0.265151	0.0116923	0.155746	0.0941253	0.000111383	1	0	1	0
circ217	circATRNL1_9	chr10	115315736	115120185	+	ENSG00000107518	ATRNL1	down	down_turquoise	down	hsa.miR.130b.5p	up	-0.298159	0.00520265	ENSG00000144278	GALNT13			-0.360576	0.000918287	0.0950792	0.211812	0.000111388	1	0	0	0
circ500	circSUV39H2	chr10	14897517	14896846	+	ENSG00000152457	DCLRE1C		down_turquoise	down	hsa.miR.450b.5p	up	-0.233641	0.0233285	ENSG00000065809	FAM107B			-0.427095	9.44158e-05	0.012089	0.459573	0.000111417	0	0	1	0
circ17709	circSLC4A7_1	chr3	27379249	27424152	-	ENSG00000033867	SLC4A7	down		down	hsa.miR.708.5p	up	-0.197115	0.0473089	ENSG00000106511	MEOX2			-0.261076	0.0129779	0.33949	0.00164985	0.000111485	0	0	0	1
circ217	circATRNL1_9	chr10	115315736	115120185	+	ENSG00000107518	ATRNL1	down	down_turquoise	down	hsa.miR.130b.5p	up	-0.298159	0.00520265	ENSG00000138757	G3BP2			-0.29307	0.00605714	0.21762	0.0321938	0.000111635	0	0	1	0
circ246	circATRNL1_11	chr10	115469329	115120185	+	ENSG00000107518	ATRNL1	down	down_turquoise	down	hsa.miR.148a.3p	up	-0.358576	0.000919439	ENSG00000153130	SCOC			-0.287859	0.00676457	0.116162	0.163871	0.000112081	0	0	1	0
circ5511	circARID1A	chr1	26732792	26729651	+	ENSG00000117713	ARID1A	up		up	hsa.miR.204.3p	down	-0.37186	0.000599038	ENSG00000163914	RHO			-0.198568	0.0460843	0.210481	0.0369369	0.000112126	0	0	0	1
circ246	circATRNL1_11	chr10	115469329	115120185	+	ENSG00000107518	ATRNL1	down	down_turquoise	down	hsa.miR.363.3p	up	-0.222003	0.0295342	ENSG00000077254	USP33	1		-0.390565	0.000347889	0.152121	0.0994347	0.000112313	0	1	1	0
circ206	circATRNL1_6	chr10	115268444	115120185	+	ENSG00000107518	ATRNL1	down		down	hsa.miR.363.3p	up	-0.317642	0.00308697	ENSG00000122482	ZNF644			-0.309392	0.00397847	0.16345	0.0835275	0.000112711	0	0	1	0
circ500	circSUV39H2	chr10	14897517	14896846	+	ENSG00000152457	DCLRE1C		down_turquoise	down	hsa.miR.450b.5p	up	-0.233641	0.0233285	ENSG00000164176	EDIL3			-0.419999	0.000122982	0.043223	0.358268	0.000112904	0	0	1	0
circ19323	circGRK4	chr4	3029409	2984513	+	ENSG00000125388	GRK4	down		down	hsa.miR.450b.5p	up	-0.198287	0.046317	ENSG00000109458	GAB1			-0.432803	7.60289e-05	0.0649336	0.292604	0.000113143	0	0	1	0
circ206	circATRNL1_6	chr10	115268444	115120185	+	ENSG00000107518	ATRNL1	down		down	hsa.miR.363.3p	up	-0.317642	0.00308697	ENSG00000187772	LIN28B			-0.360638	0.000916536	0.041338	0.364204	0.000113149	0	0	1	0
circ3518	circEIF4G3_1	chr1	20893517	20942330	-	ENSG00000075151	EIF4G3	down		down	hsa.miR.3938	up	-0.295345	0.0055946	ENSG00000080819	CPOX			-0.378656	0.000516835	0.0435987	0.357088	0.000113346	0	0	0	1
circ217	circATRNL1_9	chr10	115315736	115120185	+	ENSG00000107518	ATRNL1	down	down_turquoise	down	hsa.miR.130b.5p	up	-0.298159	0.00520265	ENSG00000146872	TLK2			-0.33466	0.00198563	0.151573	0.100255	0.000113647	1	0	1	0
circ206	circATRNL1_6	chr10	115268444	115120185	+	ENSG00000107518	ATRNL1	down		down	hsa.miR.363.3p	up	-0.317642	0.00308697	ENSG00000157764	BRAF			-0.342096	0.00160138	0.0960189	0.209518	0.000113651	0	0	1	0
circ5511	circARID1A	chr1	26732792	26729651	+	ENSG00000117713	ARID1A	up		up	hsa.miR.204.3p	down	-0.37186	0.000599038	ENSG00000214575	CPEB1			-0.294613	0.00582665	0.0633635	0.297166	0.000113792	0	0	0	1
circ202	circATRNL1_5	chr10	115241725	115120185	+	ENSG00000107518	ATRNL1	down		down	hsa.miR.363.3p	up	-0.209506	0.0376264	ENSG00000136895	GARNL3	1		-0.402474	0.000230882	0.139546	0.119503	0.000113881	0	1	1	0
circ246	circATRNL1_11	chr10	115469329	115120185	+	ENSG00000107518	ATRNL1	down	down_turquoise	down	hsa.miR.107	up	-0.399377	0.00023242	ENSG00000139372	TDG			-0.225534	0.0276141	0.116809	0.162516	0.000114345	0	0	1	0
circ246	circATRNL1_11	chr10	115469329	115120185	+	ENSG00000107518	ATRNL1	down	down_turquoise	down	hsa.miR.107	up	-0.399377	0.00023242	ENSG00000180488	MIGA1	1		-0.214488	0.0342701	0.132992	0.131003	0.000114383	0	1	1	0
circ16286	circZNF638_2	chr2	71427414	71426460	+	ENSG00000075292	ZNF638	down		down	hsa.miR.766.3p	up	-0.311524	0.00365004	ENSG00000143570	SLC39A1			-0.354838	0.00109503	0.0759996	0.261393	0.000114507	0	0	1	0
circ206	circATRNL1_6	chr10	115268444	115120185	+	ENSG00000107518	ATRNL1	down		down	hsa.miR.148a.3p	up	-0.332569	0.00202179	ENSG00000102466	FGF14	1		-0.274746	0.00932687	0.188188	0.0554226	0.00011454	0	1	0	0
circ27587	circDDX3Y	chrY	12913062	12909360	+	ENSG00000067048	DDX3Y	down		down	hsa.miR.148a.3p	up	-0.340794	0.00158703	ENSG00000134444	KIAA1468			-0.199403	0.0453873	0.255673	0.0145107	0.000114552	0	0	1	0
circ246	circATRNL1_11	chr10	115469329	115120185	+	ENSG00000107518	ATRNL1	down	down_turquoise	down	hsa.miR.363.3p	up	-0.222003	0.0295342	ENSG00000132872	SYT4			-0.387079	0.000391197	0.15806	0.0908451	0.000114966	0	0	0	1
circ246	circATRNL1_11	chr10	115469329	115120185	+	ENSG00000107518	ATRNL1	down	down_turquoise	down	hsa.miR.363.3p	up	-0.222003	0.0295342	ENSG00000127995	CASD1	1		-0.391121	0.00034141	0.148819	0.104453	0.00011531	0	1	1	0
circ219	circATRNL1_10	chr10	115315736	115215697	+	ENSG00000107518	ATRNL1		down_turquoise	down	hsa.miR.708.5p	up	-0.199181	0.0455711	ENSG00000174705	SH3PXD2B			-0.287455	0.00696455	0.31499	0.00332086	0.000115382	0	0	1	0
circ21473	circATG5	chr6	106248150	106308491	-	ENSG00000057663	ATG5	down	down_turquoise	down	hsa.miR.450b.5p	up	-0.202514	0.0428739	ENSG00000164176	EDIL3			-0.419999	0.000122982	0.0999669	0.200038	0.000115454	0	0	1	0
circ5511	circARID1A	chr1	26732792	26729651	+	ENSG00000117713	ARID1A	up		up	hsa.miR.204.3p	down	-0.37186	0.000599038	ENSG00000161981	SNRNP25			-0.240251	0.0204297	0.161394	0.0862657	0.000115547	0	0	0	1
circ206	circATRNL1_6	chr10	115268444	115120185	+	ENSG00000107518	ATRNL1	down		down	hsa.miR.363.3p	up	-0.317642	0.00308697	ENSG00000148634	HERC4			-0.360947	0.000907823	0.0373632	0.376825	0.000115575	0	0	1	0
circ7886	circVRK1	chr14	96860735	96833467	+	ENSG00000100749	VRK1		down_turquoise	down	hsa.miR.450b.5p	up	-0.273195	0.00967881	ENSG00000076706	MCAM			-0.371005	0.000661672	0.115375	0.165525	0.000115957	0	0	1	0
circ206	circATRNL1_6	chr10	115268444	115120185	+	ENSG00000107518	ATRNL1	down		down	hsa.miR.363.3p	up	-0.317642	0.00308697	ENSG00000109670	FBXW7	1		-0.306985	0.0042387	0.165305	0.0811125	0.000116078	0	1	1	0
circ217	circATRNL1_9	chr10	115315736	115120185	+	ENSG00000107518	ATRNL1	down	down_turquoise	down	hsa.miR.130b.5p	up	-0.298159	0.00520265	ENSG00000196792	STRN3			-0.318678	0.00310133	0.178112	0.0658281	0.000116154	0	0	1	0
circ206	circATRNL1_6	chr10	115268444	115120185	+	ENSG00000107518	ATRNL1	down		down	hsa.miR.363.3p	up	-0.317642	0.00308697	ENSG00000125676	THOC2			-0.296711	0.00552547	0.181392	0.0622898	0.000116186	0	0	1	0
circ27587	circDDX3Y	chrY	12913062	12909360	+	ENSG00000067048	DDX3Y	down		down	hsa.miR.148a.3p	up	-0.340794	0.00158703	ENSG00000188674	C2orf80			-0.249462	0.0166523	0.205788	0.0403486	0.00011655	0	0	0	1
circ217	circATRNL1_9	chr10	115315736	115120185	+	ENSG00000107518	ATRNL1	down	down_turquoise	down	hsa.miR.130b.5p	up	-0.298159	0.00520265	ENSG00000068796	KIF2A			-0.280822	0.00818651	0.230104	0.0250891	0.000116763	0	0	1	0
circ9676	circPHKB_2	chr16	47596531	47497399	+	ENSG00000102893	PHKB		down_turquoise	down	hsa.miR.708.5p	up	-0.215193	0.0337479	ENSG00000171766	GATM			-0.417808	0.000133292	0.0846909	0.237688	0.000116821	1	0	1	0
circ5511	circARID1A	chr1	26732792	26729651	+	ENSG00000117713	ARID1A	up		up	hsa.miR.204.3p	down	-0.37186	0.000599038	ENSG00000140365	COMMD4			-0.211434	0.0363236	0.194998	0.0491434	0.000116833	0	0	0	1
circ246	circATRNL1_11	chr10	115469329	115120185	+	ENSG00000107518	ATRNL1	down	down_turquoise	down	hsa.miR.107	up	-0.399377	0.00023242	ENSG00000167552	TUBA1A			-0.225997	0.0273602	0.11377	0.168932	0.000117298	1	0	1	0
circ246	circATRNL1_11	chr10	115469329	115120185	+	ENSG00000107518	ATRNL1	down	down_turquoise	down	hsa.miR.107	up	-0.399377	0.00023242	ENSG00000153130	SCOC			-0.22433	0.0282833	0.116162	0.163871	0.000117579	0	0	1	0
circ5511	circARID1A	chr1	26732792	26729651	+	ENSG00000117713	ARID1A	up		up	hsa.miR.204.3p	down	-0.37186	0.000599038	ENSG00000198963	RORB			-0.216247	0.033131	0.189328	0.0543297	0.000117678	0	0	0	1
circ14091	circBAZ2B	chr2	159337462	159395834	-	ENSG00000123636	BAZ2B	down		down	hsa.miR.708.5p	up	-0.296785	0.00539091	ENSG00000124762	CDKN1A		1	-0.386092	0.000404324	0.00143785	0.495184	0.000117779	0	0	1	0
circ5522	circCPSF6	chr12	69262562	69251129	+	ENSG00000111605	CPSF6	down		down	hsa.miR.107	up	-0.282951	0.00777559	ENSG00000116560	SFPQ			-0.383161	0.000445697	0.0583117	0.311695	0.00011786	0	0	1	0
circ246	circATRNL1_11	chr10	115469329	115120185	+	ENSG00000107518	ATRNL1	down	down_turquoise	down	hsa.miR.107	up	-0.399377	0.00023242	ENSG00000104723	TUSC3			-0.219949	0.0308331	0.122456	0.151014	0.000118049	0	0	1	0
circ246	circATRNL1_11	chr10	115469329	115120185	+	ENSG00000107518	ATRNL1	down	down_turquoise	down	hsa.miR.708.5p	up	-0.280353	0.00814435	ENSG00000067955	CBFB		1	-0.33935	0.00173475	0.168828	0.0766682	0.000118143	0	0	1	0
circ17709	circSLC4A7_1	chr3	27379249	27424152	-	ENSG00000033867	SLC4A7	down		down	hsa.miR.708.5p	up	-0.197115	0.0473089	ENSG00000174705	SH3PXD2B			-0.287455	0.00696455	0.315288	0.00329387	0.00011834	0	0	1	0
circ246	circATRNL1_11	chr10	115469329	115120185	+	ENSG00000107518	ATRNL1	down	down_turquoise	down	hsa.miR.148a.3p	up	-0.358576	0.000919439	ENSG00000179456	ZBTB18			-0.317107	0.00313292	0.0373476	0.376875	0.000118369	0	0	1	0
circ27587	circDDX3Y	chrY	12913062	12909360	+	ENSG00000067048	DDX3Y	down		down	hsa.miR.148a.3p	up	-0.340794	0.00158703	ENSG00000177570	SAMD12			-0.256281	0.0143144	0.196498	0.0478381	0.000118479	0	0	1	0
circ27587	circDDX3Y	chrY	12913062	12909360	+	ENSG00000067048	DDX3Y	down		down	hsa.miR.148a.3p	up	-0.340794	0.00158703	ENSG00000111711	GOLT1B			-0.227387	0.0265144	0.228664	0.0258362	0.000118518	0	0	1	0
circ246	circATRNL1_11	chr10	115469329	115120185	+	ENSG00000107518	ATRNL1	down	down_turquoise	down	hsa.miR.148a.3p	up	-0.358576	0.000919439	ENSG00000111843	TMEM14C			-0.212994	0.0352075	0.2154	0.0336127	0.000118604	0	0	1	0
circ217	circATRNL1_9	chr10	115315736	115120185	+	ENSG00000107518	ATRNL1	down	down_turquoise	down	hsa.miR.221.3p	up	-0.197542	0.0469456	ENSG00000114796	KLHL24			-0.327996	0.00239781	0.273207	0.00967613	0.00011871	0	0	1	0
circ16286	circZNF638_2	chr2	71427414	71426460	+	ENSG00000075292	ZNF638	down		down	hsa.miR.766.3p	up	-0.311524	0.00365004	ENSG00000173110	HSPA6		1	-0.34987	0.00127214	0.0856579	0.235592	0.000119155	0	0	0	1
circ246	circATRNL1_11	chr10	115469329	115120185	+	ENSG00000107518	ATRNL1	down	down_turquoise	down	hsa.miR.107	up	-0.399377	0.00023242	ENSG00000100744	GSKIP			-0.234049	0.0232402	0.098853	0.202686	0.000119238	0	0	1	0
circ19323	circGRK4	chr4	3029409	2984513	+	ENSG00000125388	GRK4	down		down	hsa.miR.450b.5p	up	-0.198287	0.046317	ENSG00000111276	CDKN1B			-0.395131	0.000297788	0.166618	0.0794349	0.000119314	1	0	1	0
circ206	circATRNL1_6	chr10	115268444	115120185	+	ENSG00000107518	ATRNL1	down		down	hsa.miR.363.3p	up	-0.317642	0.00308697	ENSG00000198815	FOXJ3			-0.344872	0.00147593	0.0834866	0.241269	0.000119657	0	0	1	0
circ206	circATRNL1_6	chr10	115268444	115120185	+	ENSG00000107518	ATRNL1	down		down	hsa.miR.363.3p	up	-0.317642	0.00308697	ENSG00000151835	SACS			-0.325096	0.0025998	0.129626	0.137192	0.000119824	0	0	1	0
circ246	circATRNL1_11	chr10	115469329	115120185	+	ENSG00000107518	ATRNL1	down	down_turquoise	down	hsa.miR.363.3p	up	-0.222003	0.0295342	ENSG00000152443	ZNF776			-0.410002	0.000176844	0.0951815	0.211561	0.000120194	0	0	1	0
circ217	circATRNL1_9	chr10	115315736	115120185	+	ENSG00000107518	ATRNL1	down	down_turquoise	down	hsa.miR.130b.5p	up	-0.298159	0.00520265	ENSG00000069275	NUCKS1			-0.318524	0.00311437	0.175893	0.0683061	0.000120363	0	0	1	0
circ8229	circMGA_1	chr15	41669958	41668828	+	ENSG00000174197	MGA		down_turquoise	down	hsa.miR.450b.5p	up	-0.221453	0.0298575	ENSG00000150867	PIP4K2A			-0.41932	0.000126095	0.0636768	0.296253	0.000121171	0	0	1	0
circ3518	circEIF4G3_1	chr1	20893517	20942330	-	ENSG00000075151	EIF4G3	down		down	hsa.miR.3938	up	-0.295345	0.0055946	ENSG00000047644	WWC3			-0.378348	0.000522067	0.0356506	0.382303	0.000121288	0	0	0	1
circ246	circATRNL1_11	chr10	115469329	115120185	+	ENSG00000107518	ATRNL1	down	down_turquoise	down	hsa.miR.130b.5p	up	-0.286115	0.00706556	ENSG00000123684	LPGAT1			-0.36468	0.000808166	0.101506	0.196411	0.00012175	0	0	1	0
circ217	circATRNL1_9	chr10	115315736	115120185	+	ENSG00000107518	ATRNL1	down	down_turquoise	down	hsa.miR.130b.5p	up	-0.298159	0.00520265	ENSG00000184226	PCDH9			-0.296156	0.00560384	0.207921	0.0387683	0.000122571	1	0	0	0
circ206	circATRNL1_6	chr10	115268444	115120185	+	ENSG00000107518	ATRNL1	down		down	hsa.miR.363.3p	up	-0.317642	0.00308697	ENSG00000123091	RNF11			-0.321548	0.00286738	0.134816	0.12773	0.000122601	0	0	1	0
circ246	circATRNL1_11	chr10	115469329	115120185	+	ENSG00000107518	ATRNL1	down	down_turquoise	down	hsa.miR.130b.5p	up	-0.286115	0.00706556	ENSG00000010072	SPRTN			-0.35709	0.0010223	0.119679	0.156603	0.000122654	0	0	0	1
circ246	circATRNL1_11	chr10	115469329	115120185	+	ENSG00000107518	ATRNL1	down	down_turquoise	down	hsa.miR.107	up	-0.399377	0.00023242	ENSG00000198551	ZNF627			-0.223775	0.0285967	0.113076	0.17042	0.000122796	0	0	1	0
circ7234	circNEMF_1	chr14	49795791	49831361	-	ENSG00000165525	NEMF		down_turquoise	down	hsa.miR.450b.5p	up	-0.228948	0.0256873	ENSG00000111276	CDKN1B			-0.395131	0.000297788	0.123799	0.148358	0.000122999	1	0	1	0
circ246	circATRNL1_11	chr10	115469329	115120185	+	ENSG00000107518	ATRNL1	down	down_turquoise	down	hsa.miR.107	up	-0.399377	0.00023242	ENSG00000143248	RGS5			-0.253024	0.0155266	0.0574329	0.314677	0.000123066	0	0	1	0
circ7234	circNEMF_1	chr14	49795791	49831361	-	ENSG00000165525	NEMF		down_turquoise	down	hsa.miR.450b.5p	up	-0.228948	0.0256873	ENSG00000225973	PIGBOS1			-0.36758	0.000737695	0.183643	0.059946	0.000123101	0	0	1	0
circ206	circATRNL1_6	chr10	115268444	115120185	+	ENSG00000107518	ATRNL1	down		down	hsa.miR.363.3p	up	-0.317642	0.00308697	ENSG00000006715	VPS41			-0.315068	0.00341955	0.146756	0.107679	0.000123169	0	0	1	0
circ500	circSUV39H2	chr10	14897517	14896846	+	ENSG00000152457	DCLRE1C		down_turquoise	down	hsa.miR.450b.5p	up	-0.233641	0.0233285	ENSG00000135720	DYNC1LI2			-0.416636	0.000139131	0.0456536	0.350663	0.000123308	0	0	1	0
circ12207	circPPP4R1_1	chr18	9583117	9595102	-	ENSG00000154845	PPP4R1	up		up	hsa.miR.619.5p	down	-0.253819	0.0151241	ENSG00000165895	ARHGAP42		1	-0.406084	0.00020332	0.039312	0.37062	0.000123451	0	1	0	0
circ246	circATRNL1_11	chr10	115469329	115120185	+	ENSG00000107518	ATRNL1	down	down_turquoise	down	hsa.miR.130b.5p	up	-0.286115	0.00706556	ENSG00000175161	CADM2			-0.370511	0.000672173	0.0835962	0.240981	0.000123901	1	0	0	0
circ27587	circDDX3Y	chrY	12913062	12909360	+	ENSG00000067048	DDX3Y	down		down	hsa.miR.148a.3p	up	-0.340794	0.00158703	ENSG00000135250	SRPK2			-0.195762	0.0484745	0.254551	0.0148797	0.000123922	0	0	1	0
circ27587	circDDX3Y	chrY	12913062	12909360	+	ENSG00000067048	DDX3Y	down		down	hsa.miR.148a.3p	up	-0.340794	0.00158703	ENSG00000198791	CNOT7			-0.208628	0.0382554	0.243731	0.0188573	0.000123938	0	0	1	0
circ206	circATRNL1_6	chr10	115268444	115120185	+	ENSG00000107518	ATRNL1	down		down	hsa.miR.363.3p	up	-0.317642	0.00308697	ENSG00000153006	SREK1IP1			-0.302758	0.00473215	0.167456	0.0783769	0.000123943	0	0	1	0
circ246	circATRNL1_11	chr10	115469329	115120185	+	ENSG00000107518	ATRNL1	down	down_turquoise	down	hsa.miR.148a.3p	up	-0.358576	0.000919439	ENSG00000198718	TOGARAM1			-0.274237	0.00944118	0.132483	0.131927	0.000123968	0	0	1	0
circ5511	circARID1A	chr1	26732792	26729651	+	ENSG00000117713	ARID1A	up		up	hsa.miR.204.3p	down	-0.37186	0.000599038	ENSG00000184007	PTP4A2			-0.239603	0.0207094	0.156995	0.0923437	0.000124004	0	0	0	1
circ27587	circDDX3Y	chrY	12913062	12909360	+	ENSG00000067048	DDX3Y	down		down	hsa.miR.148a.3p	up	-0.340794	0.00158703	ENSG00000135940	COX5B			-0.227356	0.026531	0.226045	0.0272424	0.000124142	0	0	1	0
circ246	circATRNL1_11	chr10	115469329	115120185	+	ENSG00000107518	ATRNL1	down	down_turquoise	down	hsa.miR.107	up	-0.399377	0.00023242	ENSG00000066739	ATG2B	1		-0.224793	0.0280244	0.110423	0.176181	0.000124187	0	1	1	0
circ5511	circARID1A	chr1	26732792	26729651	+	ENSG00000117713	ARID1A	up		up	hsa.miR.204.3p	down	-0.37186	0.000599038	ENSG00000198551	ZNF627			-0.273757	0.00968754	0.100858	0.197935	0.000124291	0	0	0	1
circ27587	circDDX3Y	chrY	12913062	12909360	+	ENSG00000067048	DDX3Y	down		down	hsa.miR.148a.3p	up	-0.340794	0.00158703	ENSG00000171862	PTEN			-0.210695	0.036787	0.241729	0.0196824	0.000124333	1	0	1	0
circ206	circATRNL1_6	chr10	115268444	115120185	+	ENSG00000107518	ATRNL1	down		down	hsa.miR.148a.3p	up	-0.332569	0.00202179	ENSG00000196950	SLC39A10	1		-0.295495	0.00557307	0.150357	0.102094	0.00012445	0	1	1	0
circ246	circATRNL1_11	chr10	115469329	115120185	+	ENSG00000107518	ATRNL1	down	down_turquoise	down	hsa.miR.107	up	-0.399377	0.00023242	ENSG00000164161	HHIP			-0.220875	0.0302794	0.116347	0.163483	0.000124465	0	0	1	0
circ246	circATRNL1_11	chr10	115469329	115120185	+	ENSG00000107518	ATRNL1	down	down_turquoise	down	hsa.miR.130b.5p	up	-0.286115	0.00706556	ENSG00000174839	DENND6A			-0.3238	0.00269484	0.183143	0.0604604	0.000124529	0	0	1	0
circ5511	circARID1A	chr1	26732792	26729651	+	ENSG00000117713	ARID1A	up		up	hsa.miR.204.3p	down	-0.37186	0.000599038	ENSG00000131263	RLIM			-0.238523	0.0211826	0.158044	0.0908681	0.000124702	1	0	0	0
circ27587	circDDX3Y	chrY	12913062	12909360	+	ENSG00000067048	DDX3Y	down		down	hsa.miR.148a.3p	up	-0.340794	0.00158703	ENSG00000224531	SMIM13			-0.23726	0.0216338	0.215274	0.0336951	0.000125059	0	0	1	0
circ217	circATRNL1_9	chr10	115315736	115120185	+	ENSG00000107518	ATRNL1	down	down_turquoise	down	hsa.miR.130b.5p	up	-0.298159	0.00520265	ENSG00000168653	NDUFS5			-0.304856	0.00448127	0.194384	0.0496849	0.0001252	0	0	1	0
circ206	circATRNL1_6	chr10	115268444	115120185	+	ENSG00000107518	ATRNL1	down		down	hsa.let.7g.3p	up	-0.414378	0.000133887	ENSG00000142192	APP			-0.212792	0.035399	0.0818499	0.245597	0.000125725	1	0	1	0
circ246	circATRNL1_11	chr10	115469329	115120185	+	ENSG00000107518	ATRNL1	down	down_turquoise	down	hsa.miR.130b.5p	up	-0.286115	0.00706556	ENSG00000186660	ZFP91			-0.371591	0.000649395	0.0786906	0.254064	0.000125887	0	0	1	0
circ217	circATRNL1_9	chr10	115315736	115120185	+	ENSG00000107518	ATRNL1	down	down_turquoise	down	hsa.miR.130b.5p	up	-0.298159	0.00520265	ENSG00000178988	MRFAP1L1			-0.284308	0.00752298	0.221571	0.0297881	0.000125902	0	0	0	1
circ246	circATRNL1_11	chr10	115469329	115120185	+	ENSG00000107518	ATRNL1	down	down_turquoise	down	hsa.miR.130b.5p	up	-0.286115	0.00706556	ENSG00000144278	GALNT13			-0.360576	0.000918287	0.108788	0.179791	0.00012596	1	0	0	0
circ217	circATRNL1_9	chr10	115315736	115120185	+	ENSG00000107518	ATRNL1	down	down_turquoise	down	hsa.miR.130b.5p	up	-0.298159	0.00520265	ENSG00000168944	CEP120			-0.334351	0.00200322	0.144044	0.112027	0.000126056	0	0	1	0
circ246	circATRNL1_11	chr10	115469329	115120185	+	ENSG00000107518	ATRNL1	down	down_turquoise	down	hsa.miR.708.5p	up	-0.280353	0.00814435	ENSG00000127603	MACF1			-0.339874	0.00170853	0.163161	0.0839095	0.00012606	0	0	1	0
circ206	circATRNL1_6	chr10	115268444	115120185	+	ENSG00000107518	ATRNL1	down		down	hsa.let.7g.3p	up	-0.414378	0.000133887	ENSG00000148541	FAM13C			-0.198383	0.0462385	0.104873	0.188617	0.000126068	0	0	0	1
circ27587	circDDX3Y	chrY	12913062	12909360	+	ENSG00000067048	DDX3Y	down		down	hsa.miR.148a.3p	up	-0.340794	0.00158703	ENSG00000179456	ZBTB18			-0.317107	0.00313292	0.0858915	0.234985	0.000126132	0	0	1	0
circ246	circATRNL1_11	chr10	115469329	115120185	+	ENSG00000107518	ATRNL1	down	down_turquoise	down	hsa.miR.107	up	-0.399377	0.00023242	ENSG00000114279	FGF12	1		-0.212884	0.0353367	0.126929	0.142287	0.000126154	0	1	1	0
circ206	circATRNL1_6	chr10	115268444	115120185	+	ENSG00000107518	ATRNL1	down		down	hsa.miR.363.3p	up	-0.317642	0.00308697	ENSG00000165672	PRDX3			-0.279804	0.00838958	0.199707	0.0451368	0.000126189	0	0	1	0
circ206	circATRNL1_6	chr10	115268444	115120185	+	ENSG00000107518	ATRNL1	down		down	hsa.chr9.24118.m	up	-0.339495	0.0016496	ENSG00000085224	ATRX			-0.277953	0.00876995	0.165446	0.0809319	0.000126363	1	0	0	0
circ7234	circNEMF_1	chr14	49795791	49831361	-	ENSG00000165525	NEMF		down_turquoise	down	hsa.miR.450b.5p	up	-0.228948	0.0256873	ENSG00000115365	LANCL1	1		-0.350056	0.0012651	0.211736	0.0360651	0.000126473	0	1	1	0
circ217	circATRNL1_9	chr10	115315736	115120185	+	ENSG00000107518	ATRNL1	down	down_turquoise	down	hsa.miR.130b.5p	up	-0.298159	0.00520265	ENSG00000149231	CCDC82			-0.320221	0.00297353	0.169352	0.0760237	0.000126854	0	0	0	1
circ16286	circZNF638_2	chr2	71427414	71426460	+	ENSG00000075292	ZNF638	down		down	hsa.miR.766.3p	up	-0.311524	0.00365004	ENSG00000163840	DTX3L			-0.330155	0.00225659	0.126656	0.142811	0.000126871	0	0	0	1
circ246	circATRNL1_11	chr10	115469329	115120185	+	ENSG00000107518	ATRNL1	down	down_turquoise	down	hsa.miR.107	up	-0.399377	0.00023242	ENSG00000109572	CLCN3	1		-0.204986	0.0409842	0.137203	0.123531	0.000126909	0	1	1	0
circ5511	circARID1A	chr1	26732792	26729651	+	ENSG00000117713	ARID1A	up		up	hsa.miR.204.3p	down	-0.37186	0.000599038	ENSG00000123472	ATPAF1			-0.235222	0.0226856	0.161077	0.0866944	0.000127044	0	0	0	1
circ27587	circDDX3Y	chrY	12913062	12909360	+	ENSG00000067048	DDX3Y	down		down	hsa.miR.148a.3p	up	-0.340794	0.00158703	ENSG00000168958	MFF			-0.23075	0.0247598	0.221147	0.0300388	0.000127251	0	0	1	0
circ246	circATRNL1_11	chr10	115469329	115120185	+	ENSG00000107518	ATRNL1	down	down_turquoise	down	hsa.miR.363.3p	up	-0.222003	0.0295342	ENSG00000034693	PEX3			-0.376589	0.000552814	0.172422	0.0723242	0.000127295	0	0	1	0
circ246	circATRNL1_11	chr10	115469329	115120185	+	ENSG00000107518	ATRNL1	down	down_turquoise	down	hsa.miR.107	up	-0.399377	0.00023242	ENSG00000198862	LTN1	1		-0.219301	0.0312256	0.116501	0.16316	0.000127602	0	1	1	0
circ206	circATRNL1_6	chr10	115268444	115120185	+	ENSG00000107518	ATRNL1	down		down	hsa.miR.363.3p	up	-0.317642	0.00308697	ENSG00000135297	MTO1			-0.318215	0.0031406	0.137918	0.122292	0.00012774	0	0	1	0
circ3518	circEIF4G3_1	chr1	20893517	20942330	-	ENSG00000075151	EIF4G3	down		down	hsa.miR.3938	up	-0.295345	0.0055946	ENSG00000168522	FNTA			-0.358139	0.000989941	0.0934942	0.215713	0.000128585	0	0	0	1
circ206	circATRNL1_6	chr10	115268444	115120185	+	ENSG00000107518	ATRNL1	down		down	hsa.let.7g.3p	up	-0.414378	0.000133887	ENSG00000215251	FASTKD5			-0.198661	0.0460073	0.10241	0.194301	0.000128785	0	0	0	1
circ246	circATRNL1_11	chr10	115469329	115120185	+	ENSG00000107518	ATRNL1	down	down_turquoise	down	hsa.miR.107	up	-0.399377	0.00023242	ENSG00000175087	PDIK1L			-0.197766	0.0467556	0.145148	0.110242	0.000128892	0	0	1	0
circ8229	circMGA_1	chr15	41669958	41668828	+	ENSG00000174197	MGA		down_turquoise	down	hsa.miR.450b.5p	up	-0.221453	0.0298575	ENSG00000166147	FBN1			-0.381896	0.000464715	0.161028	0.0867597	0.000129432	1	0	1	0
circ500	circSUV39H2	chr10	14897517	14896846	+	ENSG00000152457	DCLRE1C		down_turquoise	down	hsa.miR.450b.5p	up	-0.233641	0.0233285	ENSG00000028528	SNX1			-0.399574	0.000255461	0.0989988	0.202339	0.000129621	0	0	1	0
circ246	circATRNL1_11	chr10	115469329	115120185	+	ENSG00000107518	ATRNL1	down	down_turquoise	down	hsa.miR.107	up	-0.399377	0.00023242	ENSG00000163811	WDR43			-0.20585	0.0403334	0.134087	0.129031	0.000129967	0	0	1	0
circ246	circATRNL1_11	chr10	115469329	115120185	+	ENSG00000107518	ATRNL1	down	down_turquoise	down	hsa.miR.107	up	-0.399377	0.00023242	ENSG00000173726	TOMM20	1		-0.224639	0.0281105	0.106397	0.185151	0.000129976	1	1	1	0
circ246	circATRNL1_11	chr10	115469329	115120185	+	ENSG00000107518	ATRNL1	down	down_turquoise	down	hsa.miR.148a.3p	up	-0.358576	0.000919439	ENSG00000188674	C2orf80			-0.249462	0.0166523	0.16693	0.0790396	0.000130022	0	0	0	1
circ246	circATRNL1_11	chr10	115469329	115120185	+	ENSG00000107518	ATRNL1	down	down_turquoise	down	hsa.miR.107	up	-0.399377	0.00023242	ENSG00000083642	PDS5B			-0.203505	0.0421192	0.13708	0.123745	0.000130136	0	0	1	0
circ246	circATRNL1_11	chr10	115469329	115120185	+	ENSG00000107518	ATRNL1	down	down_turquoise	down	hsa.miR.130b.5p	up	-0.286115	0.00706556	ENSG00000100697	DICER1			-0.361564	0.000890621	0.102771	0.19346	0.000130692	0	0	1	0
circ206	circATRNL1_6	chr10	115268444	115120185	+	ENSG00000107518	ATRNL1	down		down	hsa.miR.363.3p	up	-0.317642	0.00308697	ENSG00000112210	RAB23			-0.31513	0.00341387	0.141893	0.11556	0.000130734	0	0	1	0
circ217	circATRNL1_9	chr10	115315736	115120185	+	ENSG00000107518	ATRNL1	down	down_turquoise	down	hsa.miR.130b.5p	up	-0.298159	0.00520265	ENSG00000130338	TULP4			-0.231673	0.0243985	0.273498	0.00960915	0.000130912	0	0	1	0
circ219	circATRNL1_10	chr10	115315736	115215697	+	ENSG00000107518	ATRNL1		down_turquoise	down	hsa.miR.424.5p	up	-0.239222	0.0207584	ENSG00000087245	MMP2			-0.203721	0.0419521	0.344952	0.00140075	0.000130921	0	0	1	0
circ27587	circDDX3Y	chrY	12913062	12909360	+	ENSG00000067048	DDX3Y	down		down	hsa.miR.148a.3p	up	-0.340794	0.00158703	ENSG00000061676	NCKAP1			-0.211914	0.0359426	0.237808	0.021386	0.000130925	0	0	1	0
circ246	circATRNL1_11	chr10	115469329	115120185	+	ENSG00000107518	ATRNL1	down	down_turquoise	down	hsa.miR.363.3p	up	-0.222003	0.0295342	ENSG00000085365	SCAMP1			-0.393188	0.000318248	0.133655	0.129806	0.000130941	0	0	1	0
circ27587	circDDX3Y	chrY	12913062	12909360	+	ENSG00000067048	DDX3Y	down		down	hsa.miR.148a.3p	up	-0.340794	0.00158703	ENSG00000197959	DNM3	1		-0.210371	0.0370141	0.239045	0.0208361	0.000131302	0	1	1	0
circ246	circATRNL1_11	chr10	115469329	115120185	+	ENSG00000107518	ATRNL1	down	down_turquoise	down	hsa.miR.107	up	-0.399377	0.00023242	ENSG00000129128	SPCS3			-0.220011	0.0307959	0.112629	0.171383	0.000131554	0	0	1	0
circ217	circATRNL1_9	chr10	115315736	115120185	+	ENSG00000107518	ATRNL1	down	down_turquoise	down	hsa.miR.130b.5p	up	-0.298159	0.00520265	ENSG00000189042	ZNF567			-0.3325	0.00211169	0.144206	0.111764	0.000131665	0	0	1	0
circ16286	circZNF638_2	chr2	71427414	71426460	+	ENSG00000075292	ZNF638	down		down	hsa.miR.766.3p	up	-0.311524	0.00365004	ENSG00000196236	XPNPEP3			-0.358972	0.000964904	0.0460355	0.349473	0.000131937	0	0	1	0
circ246	circATRNL1_11	chr10	115469329	115120185	+	ENSG00000107518	ATRNL1	down	down_turquoise	down	hsa.miR.130b.5p	up	-0.286115	0.00706556	ENSG00000173848	NET1	1		-0.329107	0.00232423	0.170185	0.0750058	0.000132022	0	1	1	0
circ206	circATRNL1_6	chr10	115268444	115120185	+	ENSG00000107518	ATRNL1	down		down	hsa.chr9.24118.m	up	-0.339495	0.0016496	ENSG00000138757	G3BP2			-0.262218	0.0126472	0.184338	0.0592372	0.000132403	0	0	0	1
circ5511	circARID1A	chr1	26732792	26729651	+	ENSG00000117713	ARID1A	up		up	hsa.miR.204.3p	down	-0.37186	0.000599038	ENSG00000173726	TOMM20	1		-0.232784	0.0238512	0.161156	0.0865871	0.000132521	1	0	0	0
circ3518	circEIF4G3_1	chr1	20893517	20942330	-	ENSG00000075151	EIF4G3	down		down	hsa.miR.3938	up	-0.295345	0.0055946	ENSG00000135164	DMTF1			-0.312909	0.00362343	0.18259	0.061034	0.000132533	0	0	0	1
circ246	circATRNL1_11	chr10	115469329	115120185	+	ENSG00000107518	ATRNL1	down	down_turquoise	down	hsa.miR.363.3p	up	-0.222003	0.0295342	ENSG00000176055	MBLAC2			-0.373349	0.000613794	0.175847	0.0683588	0.000132713	0	0	0	1
circ7234	circNEMF_1	chr14	49795791	49831361	-	ENSG00000165525	NEMF		down_turquoise	down	hsa.miR.450b.5p	up	-0.228948	0.0256873	ENSG00000107362	ABHD17B			-0.353388	0.00114428	0.203388	0.0421876	0.000132791	0	0	1	0
circ206	circATRNL1_6	chr10	115268444	115120185	+	ENSG00000107518	ATRNL1	down		down	hsa.miR.363.3p	up	-0.317642	0.00308697	ENSG00000118260	CREB1			-0.288967	0.00670934	0.183621	0.0599694	0.000132977	0	0	1	0
circ27587	circDDX3Y	chrY	12913062	12909360	+	ENSG00000067048	DDX3Y	down		down	hsa.miR.148a.3p	up	-0.340794	0.00158703	ENSG00000179387	ELMOD2			-0.210896	0.036647	0.237841	0.0213714	0.00013306	0	0	1	0
circ246	circATRNL1_11	chr10	115469329	115120185	+	ENSG00000107518	ATRNL1	down	down_turquoise	down	hsa.miR.148a.3p	up	-0.358576	0.000919439	ENSG00000115561	CHMP3			-0.237337	0.0215988	0.18103	0.0626725	0.000133212	0	0	1	0
circ206	circATRNL1_6	chr10	115268444	115120185	+	ENSG00000107518	ATRNL1	down		down	hsa.miR.363.3p	up	-0.317642	0.00308697	ENSG00000050165	DKK3			-0.31007	0.00390766	0.14964	0.10319	0.000133226	0	0	1	0
circ27587	circDDX3Y	chrY	12913062	12909360	+	ENSG00000067048	DDX3Y	down		down	hsa.miR.148a.3p	up	-0.340794	0.00158703	ENSG00000119231	SENP5			-0.19587	0.0483807	0.250613	0.0162366	0.000133403	0	0	1	0
circ206	circATRNL1_6	chr10	115268444	115120185	+	ENSG00000107518	ATRNL1	down		down	hsa.miR.363.3p	up	-0.317642	0.00308697	ENSG00000135677	GNS			-0.254659	0.0149774	0.226548	0.0269672	0.000133417	0	0	1	0
circ217	circATRNL1_9	chr10	115315736	115120185	+	ENSG00000107518	ATRNL1	down	down_turquoise	down	hsa.chr5.14497.s	up	-0.251479	0.0159295	ENSG00000196104	SPOCK3			-0.346063	0.00135442	0.185754	0.0578109	0.00013346	0	0	0	1
circ206	circATRNL1_6	chr10	115268444	115120185	+	ENSG00000107518	ATRNL1	down		down	hsa.miR.363.3p	up	-0.317642	0.00308697	ENSG00000113552	GNPDA1			-0.278662	0.00862242	0.197634	0.0468677	0.000133479	0	0	1	0
circ5511	circARID1A	chr1	26732792	26729651	+	ENSG00000117713	ARID1A	up		up	hsa.miR.204.3p	down	-0.37186	0.000599038	ENSG00000129625	REEP5			-0.262711	0.0125064	0.114404	0.167582	0.000134218	0	0	0	1
circ246	circATRNL1_11	chr10	115469329	115120185	+	ENSG00000107518	ATRNL1	down	down_turquoise	down	hsa.miR.130b.5p	up	-0.286115	0.00706556	ENSG00000085365	SCAMP1			-0.347371	0.00137064	0.133655	0.129806	0.000134365	0	0	1	0
circ27587	circDDX3Y	chrY	12913062	12909360	+	ENSG00000067048	DDX3Y	down		down	hsa.miR.148a.3p	up	-0.340794	0.00158703	ENSG00000085433	WDR47			-0.224348	0.0281863	0.224483	0.0281102	0.000134398	0	0	1	0
circ246	circATRNL1_11	chr10	115469329	115120185	+	ENSG00000107518	ATRNL1	down	down_turquoise	down	hsa.miR.130b.5p	up	-0.286115	0.00706556	ENSG00000110344	UBE4A			-0.303838	0.00460152	0.208042	0.0386802	0.000134411	0	0	1	0
circ246	circATRNL1_11	chr10	115469329	115120185	+	ENSG00000107518	ATRNL1	down	down_turquoise	down	hsa.miR.107	up	-0.399377	0.00023242	ENSG00000109586	GALNT7			-0.209089	0.0379663	0.12676	0.142612	0.000134489	0	0	1	0
circ217	circATRNL1_9	chr10	115315736	115120185	+	ENSG00000107518	ATRNL1	down	down_turquoise	down	hsa.miR.130b.5p	up	-0.298159	0.00520265	ENSG00000173230	GOLGB1			-0.283383	0.00769443	0.218689	0.0315281	0.000134829	0	0	1	0
circ217	circATRNL1_9	chr10	115315736	115120185	+	ENSG00000107518	ATRNL1	down	down_turquoise	down	hsa.miR.130b.5p	up	-0.298159	0.00520265	ENSG00000163512	AZI2			-0.26268	0.0125151	0.242394	0.0194053	0.000134958	0	0	1	0
circ5511	circARID1A	chr1	26732792	26729651	+	ENSG00000117713	ARID1A	up		up	hsa.miR.204.3p	down	-0.37186	0.000599038	ENSG00000124688	MAD2L1BP			-0.247316	0.0175787	0.139257	0.119995	0.000134965	0	0	0	1
circ206	circATRNL1_6	chr10	115268444	115120185	+	ENSG00000107518	ATRNL1	down		down	hsa.miR.148a.3p	up	-0.332569	0.00202179	ENSG00000148925	BTBD10			-0.270365	0.0103505	0.183059	0.0605472	0.000135284	0	0	1	0
circ217	circATRNL1_9	chr10	115315736	115120185	+	ENSG00000107518	ATRNL1	down	down_turquoise	down	hsa.miR.130b.5p	up	-0.298159	0.00520265	ENSG00000010072	SPRTN			-0.35709	0.0010223	0.0845706	0.238426	0.000135382	0	0	0	1
circ5511	circARID1A	chr1	26732792	26729651	+	ENSG00000117713	ARID1A	up		up	hsa.miR.204.3p	down	-0.37186	0.000599038	ENSG00000116205	TCEANC2			-0.209645	0.037572	0.187232	0.0563512	0.000135399	0	0	0	1
circ246	circATRNL1_11	chr10	115469329	115120185	+	ENSG00000107518	ATRNL1	down	down_turquoise	down	hsa.miR.130b.5p	up	-0.286115	0.00706556	ENSG00000093144	ECHDC1			-0.337498	0.00183018	0.153015	0.0981048	0.000135428	0	0	0	1
circ17709	circSLC4A7_1	chr3	27379249	27424152	-	ENSG00000033867	SLC4A7	down		down	hsa.miR.629.5p	up	-0.197751	0.0467681	ENSG00000114166	KAT2B			-0.365019	0.000799616	0.214906	0.0339354	0.00013547	1	0	1	0
circ206	circATRNL1_6	chr10	115268444	115120185	+	ENSG00000107518	ATRNL1	down		down	hsa.miR.148a.3p	up	-0.332569	0.00202179	ENSG00000173482	PTPRM			-0.206453	0.0398506	0.25194	0.015768	0.000135595	0	0	1	0
circ246	circATRNL1_11	chr10	115469329	115120185	+	ENSG00000107518	ATRNL1	down	down_turquoise	down	hsa.miR.107	up	-0.399377	0.00023242	ENSG00000051382	PIK3CB	1		-0.198568	0.0460843	0.139996	0.118741	0.000135724	0	0	1	0
circ246	circATRNL1_11	chr10	115469329	115120185	+	ENSG00000107518	ATRNL1	down	down_turquoise	down	hsa.miR.148a.3p	up	-0.358576	0.000919439	ENSG00000156411	C14orf2			-0.267727	0.011012	0.13563	0.126288	0.000136352	0	0	1	0
circ206	circATRNL1_6	chr10	115268444	115120185	+	ENSG00000107518	ATRNL1	down		down	hsa.let.7g.3p	up	-0.414378	0.000133887	ENSG00000130338	TULP4			-0.19502	0.0491121	0.102285	0.194591	0.000136434	0	0	1	0
circ3518	circEIF4G3_1	chr1	20893517	20942330	-	ENSG00000075151	EIF4G3	down		down	hsa.miR.10a.5p	up	-0.230139	0.0250709	ENSG00000116560	SFPQ			-0.399605	0.000255187	0.0998063	0.200418	0.000136682	0	0	1	0
circ217	circATRNL1_9	chr10	115315736	115120185	+	ENSG00000107518	ATRNL1	down	down_turquoise	down	hsa.miR.130b.5p	up	-0.298159	0.00520265	ENSG00000009307	CSDE1			-0.302758	0.00473215	0.191632	0.0521735	0.000136891	0	0	1	0
circ5511	circARID1A	chr1	26732792	26729651	+	ENSG00000117713	ARID1A	up		up	hsa.miR.204.3p	down	-0.37186	0.000599038	ENSG00000151743	AMN1			-0.281501	0.0080535	0.0741464	0.2665	0.000137001	0	0	0	1
circ217	circATRNL1_9	chr10	115315736	115120185	+	ENSG00000107518	ATRNL1	down	down_turquoise	down	hsa.miR.130b.5p	up	-0.298159	0.00520265	ENSG00000108946	PRKAR1A	1		-0.327379	0.00243958	0.150715	0.10155	0.000137297	0	1	1	0
circ246	circATRNL1_11	chr10	115469329	115120185	+	ENSG00000107518	ATRNL1	down	down_turquoise	down	hsa.miR.148a.3p	up	-0.358576	0.000919439	ENSG00000164933	SLC25A32			-0.2465	0.0177633	0.167023	0.0789227	0.000137304	0	0	1	0
circ27587	circDDX3Y	chrY	12913062	12909360	+	ENSG00000067048	DDX3Y	down		down	hsa.miR.148a.3p	up	-0.340794	0.00158703	ENSG00000140280	LYSMD2			-0.232585	0.0238429	0.214688	0.0340785	0.000137352	0	0	1	0
circ246	circATRNL1_11	chr10	115469329	115120185	+	ENSG00000107518	ATRNL1	down	down_turquoise	down	hsa.miR.130b.5p	up	-0.286115	0.00706556	ENSG00000051382	PIK3CB	1		-0.343453	0.00153891	0.139996	0.118741	0.000137498	0	0	1	0
circ246	circATRNL1_11	chr10	115469329	115120185	+	ENSG00000107518	ATRNL1	down	down_turquoise	down	hsa.miR.107	up	-0.399377	0.00023242	ENSG00000138604	GLCE			-0.243243	0.0191782	0.0657015	0.290384	0.000137798	0	0	1	0
circ246	circATRNL1_11	chr10	115469329	115120185	+	ENSG00000107518	ATRNL1	down	down_turquoise	down	hsa.miR.148a.3p	up	-0.358576	0.000919439	ENSG00000172020	GAP43			-0.253056	0.0153829	0.157505	0.0916247	0.00013794	1	0	0	0
circ27587	circDDX3Y	chrY	12913062	12909360	+	ENSG00000067048	DDX3Y	down		down	hsa.chr5.14497.s	up	-0.242594	0.0193225	ENSG00000105793	GTPBP10			-0.314762	0.00334166	0.240769	0.0200887	0.000138051	0	0	0	1
circ246	circATRNL1_11	chr10	115469329	115120185	+	ENSG00000107518	ATRNL1	down	down_turquoise	down	hsa.miR.107	up	-0.399377	0.00023242	ENSG00000077152	UBE2T			-0.211712	0.0361329	0.120728	0.154476	0.000138067	0	0	1	0
circ246	circATRNL1_11	chr10	115469329	115120185	+	ENSG00000107518	ATRNL1	down	down_turquoise	down	hsa.miR.130b.5p	up	-0.286115	0.00706556	ENSG00000149311	ATM			-0.3723	0.00063481	0.0657786	0.290162	0.00013845	0	0	1	0
circ246	circATRNL1_11	chr10	115469329	115120185	+	ENSG00000107518	ATRNL1	down	down_turquoise	down	hsa.miR.107	up	-0.399377	0.00023242	ENSG00000115310	RTN4			-0.221831	0.0297157	0.104653	0.189119	0.000138881	0	0	1	0
circ246	circATRNL1_11	chr10	115469329	115120185	+	ENSG00000107518	ATRNL1	down	down_turquoise	down	hsa.miR.107	up	-0.399377	0.00023242	ENSG00000213186	TRIM59			-0.242287	0.019571	0.0667968	0.287232	0.000138915	0	0	1	0
circ246	circATRNL1_11	chr10	115469329	115120185	+	ENSG00000107518	ATRNL1	down	down_turquoise	down	hsa.miR.148a.3p	up	-0.358576	0.000919439	ENSG00000152193	RNF219			-0.200282	0.0446654	0.218192	0.0318357	0.000138996	0	0	1	0
circ246	circATRNL1_11	chr10	115469329	115120185	+	ENSG00000107518	ATRNL1	down	down_turquoise	down	hsa.miR.363.3p	up	-0.222003	0.0295342	ENSG00000178567	EPM2AIP1			-0.366778	0.000756608	0.185025	0.0585413	0.000139064	0	0	1	0
circ15905	circNRXN1_3	chr2	50472298	50620183	-	ENSG00000179915	NRXN1	down		down	hsa.miR.708.5p	up	-0.216171	0.0331142	ENSG00000026508	CD44			-0.413921	0.000153569	0.0774387	0.25746	0.000139167	1	0	1	0
circ246	circATRNL1_11	chr10	115469329	115120185	+	ENSG00000107518	ATRNL1	down	down_turquoise	down	hsa.miR.148a.3p	up	-0.358576	0.000919439	ENSG00000148925	BTBD10			-0.270365	0.0103505	0.129367	0.137675	0.000139253	0	0	1	0
circ246	circATRNL1_11	chr10	115469329	115120185	+	ENSG00000107518	ATRNL1	down	down_turquoise	down	hsa.miR.148a.3p	up	-0.358576	0.000919439	ENSG00000102466	FGF14	1		-0.274746	0.00932687	0.12153	0.152863	0.000139314	0	1	0	0
circ246	circATRNL1_11	chr10	115469329	115120185	+	ENSG00000107518	ATRNL1	down	down_turquoise	down	hsa.miR.148a.3p	up	-0.358576	0.000919439	ENSG00000111716	LDHB			-0.26023	0.0130915	0.145966	0.108934	0.000139346	0	0	1	0
circ27587	circDDX3Y	chrY	12913062	12909360	+	ENSG00000067048	DDX3Y	down		down	hsa.miR.148a.3p	up	-0.340794	0.00158703	ENSG00000115762	PLEKHB2			-0.222512	0.0292372	0.22419	0.0282754	0.000139416	0	0	1	0
circ206	circATRNL1_6	chr10	115268444	115120185	+	ENSG00000107518	ATRNL1	down		down	hsa.miR.363.3p	up	-0.317642	0.00308697	ENSG00000123552	USP45			-0.31948	0.00303428	0.128004	0.14024	0.000139564	1	0	1	0
circ246	circATRNL1_11	chr10	115469329	115120185	+	ENSG00000107518	ATRNL1	down	down_turquoise	down	hsa.miR.107	up	-0.399377	0.00023242	ENSG00000109670	FBXW7	1		-0.210817	0.0367502	0.12079	0.154352	0.000140004	0	1	1	0
circ27587	circDDX3Y	chrY	12913062	12909360	+	ENSG00000067048	DDX3Y	down		down	hsa.miR.148a.3p	up	-0.340794	0.00158703	ENSG00000145293	ENOPH1	1		-0.226029	0.027251	0.220301	0.0305447	0.000140243	0	1	1	0
circ217	circATRNL1_9	chr10	115315736	115120185	+	ENSG00000107518	ATRNL1	down	down_turquoise	down	hsa.miR.130b.5p	up	-0.298159	0.00520265	ENSG00000169519	METTL15			-0.291806	0.00625204	0.205346	0.0406822	0.000140451	0	0	1	0
circ27587	circDDX3Y	chrY	12913062	12909360	+	ENSG00000067048	DDX3Y	down		down	hsa.miR.148a.3p	up	-0.340794	0.00158703	ENSG00000126261	UBA2			-0.197336	0.0471207	0.246676	0.0176958	0.000140455	0	0	1	0
circ27587	circDDX3Y	chrY	12913062	12909360	+	ENSG00000067048	DDX3Y	down		down	hsa.miR.148a.3p	up	-0.340794	0.00158703	ENSG00000138398	PPIG			-0.231274	0.0244949	0.214655	0.0340999	0.000140664	0	0	1	0
circ217	circATRNL1_9	chr10	115315736	115120185	+	ENSG00000107518	ATRNL1	down	down_turquoise	down	hsa.chr5.14497.s	up	-0.251479	0.0159295	ENSG00000157107	FCHO2			-0.371023	0.000615756	0.130361	0.135822	0.000141272	0	0	0	1
circ5511	circARID1A	chr1	26732792	26729651	+	ENSG00000117713	ARID1A	up		up	hsa.miR.204.3p	down	-0.37186	0.000599038	ENSG00000116030	SUMO1			-0.266074	0.0115823	0.10316	0.192558	0.000141616	0	0	0	1
circ246	circATRNL1_11	chr10	115469329	115120185	+	ENSG00000107518	ATRNL1	down	down_turquoise	down	hsa.miR.363.3p	up	-0.222003	0.0295342	ENSG00000144290	SLC4A10			-0.395409	0.000294966	0.120959	0.15401	0.000142134	1	0	0	0
circ15905	circNRXN1_3	chr2	50472298	50620183	-	ENSG00000179915	NRXN1	down		down	hsa.miR.708.5p	up	-0.216171	0.0331142	ENSG00000158006	PAFAH2			-0.408028	0.000189763	0.0942961	0.213734	0.000142262	0	0	1	0
circ246	circATRNL1_11	chr10	115469329	115120185	+	ENSG00000107518	ATRNL1	down	down_turquoise	down	hsa.miR.130b.5p	up	-0.286115	0.00706556	ENSG00000168944	CEP120			-0.334351	0.00200322	0.154898	0.0953492	0.000142855	0	0	1	0
circ217	circATRNL1_9	chr10	115315736	115120185	+	ENSG00000107518	ATRNL1	down	down_turquoise	down	hsa.miR.130b.5p	up	-0.298159	0.00520265	ENSG00000164022	AIMP1			-0.309546	0.00396227	0.178306	0.0656143	0.000143132	0	0	0	1
circ619	circZMYND11_2	chr10	249088	179994	+	ENSG00000015171	ZMYND11		down_turquoise	down	hsa.miR.708.5p	up	-0.265587	0.0115747	ENSG00000124762	CDKN1A		1	-0.386092	0.000404324	0.0659325	0.289718	0.000143431	0	0	1	0
circ5511	circARID1A	chr1	26732792	26729651	+	ENSG00000117713	ARID1A	up		up	hsa.miR.204.3p	down	-0.37186	0.000599038	ENSG00000119801	YPEL5			-0.263421	0.0123063	0.106908	0.183996	0.00014348	0	0	0	1
circ206	circATRNL1_6	chr10	115268444	115120185	+	ENSG00000107518	ATRNL1	down		down	hsa.miR.363.3p	up	-0.317642	0.00308697	ENSG00000100916	BRMS1L			-0.327471	0.00243328	0.108411	0.180629	0.000143515	0	0	1	0
circ246	circATRNL1_11	chr10	115469329	115120185	+	ENSG00000107518	ATRNL1	down	down_turquoise	down	hsa.miR.107	up	-0.399377	0.00023242	ENSG00000110429	FBXO3			-0.197735	0.0467816	0.136478	0.124796	0.000143526	0	0	1	0
circ206	circATRNL1_6	chr10	115268444	115120185	+	ENSG00000107518	ATRNL1	down		down	hsa.miR.148a.3p	up	-0.332569	0.00202179	ENSG00000186952	TMEM232			-0.227572	0.0264153	0.229479	0.0254112	0.000143545	0	0	1	0
circ27587	circDDX3Y	chrY	12913062	12909360	+	ENSG00000067048	DDX3Y	down		down	hsa.miR.148a.3p	up	-0.340794	0.00158703	ENSG00000101746	NOL4			-0.240977	0.0200001	0.202599	0.0428066	0.000143691	0	0	0	1
circ206	circATRNL1_6	chr10	115268444	115120185	+	ENSG00000107518	ATRNL1	down		down	hsa.miR.363.3p	up	-0.317642	0.00308697	ENSG00000067715	SYT1			-0.323831	0.00269254	0.116189	0.163813	0.000143953	1	0	1	0
circ206	circATRNL1_6	chr10	115268444	115120185	+	ENSG00000107518	ATRNL1	down		down	hsa.miR.363.3p	up	-0.317642	0.00308697	ENSG00000152409	JMY			-0.344008	0.00151398	0.0653116	0.29151	0.000144028	0	0	1	0
circ217	circATRNL1_9	chr10	115315736	115120185	+	ENSG00000107518	ATRNL1	down	down_turquoise	down	hsa.miR.130b.5p	up	-0.298159	0.00520265	ENSG00000171806	METTL18			-0.337067	0.00185311	0.127415	0.141361	0.00014407	0	0	1	0
circ3518	circEIF4G3_1	chr1	20893517	20942330	-	ENSG00000075151	EIF4G3	down		down	hsa.miR.3938	up	-0.295345	0.0055946	ENSG00000182168	UNC5C			-0.37119	0.000657773	0.03937	0.370436	0.0001441	0	0	0	1
circ246	circATRNL1_11	chr10	115469329	115120185	+	ENSG00000107518	ATRNL1	down	down_turquoise	down	hsa.miR.107	up	-0.399377	0.00023242	ENSG00000118873	RAB3GAP2	1		-0.219024	0.031395	0.10561	0.186935	0.000144176	0	1	1	0
circ246	circATRNL1_11	chr10	115469329	115120185	+	ENSG00000107518	ATRNL1	down	down_turquoise	down	hsa.miR.130b.5p	up	-0.286115	0.00706556	ENSG00000188177	ZC3H6			-0.339134	0.00174565	0.14487	0.110689	0.000144286	0	0	0	1
circ206	circATRNL1_6	chr10	115268444	115120185	+	ENSG00000107518	ATRNL1	down		down	hsa.miR.148a.3p	up	-0.332569	0.00202179	ENSG00000153130	SCOC			-0.287859	0.00676457	0.151807	0.0999048	0.000144387	0	0	1	0
circ15905	circNRXN1_3	chr2	50472298	50620183	-	ENSG00000179915	NRXN1	down		down	hsa.miR.629.5p	up	-0.30334	0.0045432	ENSG00000146360	GPR6			-0.369184	0.000701147	0.0212887	0.429059	0.000144423	0	0	0	1
circ5511	circARID1A	chr1	26732792	26729651	+	ENSG00000117713	ARID1A	up		up	hsa.miR.204.3p	down	-0.37186	0.000599038	ENSG00000099256	PRTFDC1			-0.259287	0.0135112	0.113784	0.168902	0.000144451	0	0	0	1
circ206	circATRNL1_6	chr10	115268444	115120185	+	ENSG00000107518	ATRNL1	down		down	hsa.miR.148a.3p	up	-0.332569	0.00202179	ENSG00000109184	DCUN1D4	1		-0.26384	0.0120521	0.187424	0.0561638	0.000144586	0	1	1	0
circ206	circATRNL1_6	chr10	115268444	115120185	+	ENSG00000107518	ATRNL1	down		down	hsa.miR.363.3p	up	-0.317642	0.00308697	ENSG00000165156	ZHX1			-0.311428	0.00376936	0.14063	0.11767	0.000144647	0	0	1	0
circ27587	circDDX3Y	chrY	12913062	12909360	+	ENSG00000067048	DDX3Y	down		down	hsa.miR.148a.3p	up	-0.340794	0.00158703	ENSG00000088682	COQ9			-0.235285	0.0225454	0.20857	0.0382971	0.000144746	0	0	1	0
circ5511	circARID1A	chr1	26732792	26729651	+	ENSG00000117713	ARID1A	up		up	hsa.miR.204.3p	down	-0.37186	0.000599038	ENSG00000151779	NBAS			-0.247593	0.0174738	0.132841	0.131276	0.000145096	0	0	0	1
circ7886	circVRK1	chr14	96860735	96833467	+	ENSG00000100749	VRK1		down_turquoise	down	hsa.miR.450b.5p	up	-0.273195	0.00967881	ENSG00000090686	USP48			-0.359466	0.000950338	0.123196	0.149546	0.000145225	0	0	1	0
circ217	circATRNL1_9	chr10	115315736	115120185	+	ENSG00000107518	ATRNL1	down	down_turquoise	down	hsa.miR.130b.5p	up	-0.298159	0.00520265	ENSG00000139116	KIF21A			-0.282395	0.00788103	0.215466	0.0335697	0.000145306	0	0	1	0
circ5511	circARID1A	chr1	26732792	26729651	+	ENSG00000117713	ARID1A	up		up	hsa.miR.204.3p	down	-0.37186	0.000599038	ENSG00000116251	RPL22			-0.235468	0.0225703	0.150389	0.102045	0.000145603	0	0	0	1
circ217	circATRNL1_9	chr10	115315736	115120185	+	ENSG00000107518	ATRNL1	down	down_turquoise	down	hsa.miR.221.3p	up	-0.197542	0.0469456	ENSG00000169946	ZFPM2			-0.379181	0.000508052	0.185689	0.0578755	0.000145665	0	0	0	1
circ5511	circARID1A	chr1	26732792	26729651	+	ENSG00000117713	ARID1A	up		up	hsa.miR.204.3p	down	-0.37186	0.000599038	ENSG00000169085	C8orf46			-0.257312	0.0141211	0.116341	0.163495	0.000145906	0	0	0	1
circ27587	circDDX3Y	chrY	12913062	12909360	+	ENSG00000067048	DDX3Y	down		down	hsa.miR.148a.3p	up	-0.340794	0.00158703	ENSG00000184368	MAP7D2			-0.231336	0.0244639	0.212345	0.0356476	0.000145997	0	0	1	0
circ246	circATRNL1_11	chr10	115469329	115120185	+	ENSG00000107518	ATRNL1	down	down_turquoise	down	hsa.miR.107	up	-0.399377	0.00023242	ENSG00000123562	MORF4L2			-0.223683	0.0286492	0.0965082	0.208329	0.000146285	0	0	1	0
circ206	circATRNL1_6	chr10	115268444	115120185	+	ENSG00000107518	ATRNL1	down		down	hsa.let.7g.3p	up	-0.414378	0.000133887	ENSG00000121769	FABP3			-0.220289	0.0306291	0.0493344	0.339257	0.000146654	1	0	0	0
circ206	circATRNL1_6	chr10	115268444	115120185	+	ENSG00000107518	ATRNL1	down		down	hsa.miR.148a.3p	up	-0.332569	0.00202179	ENSG00000135776	ABCB10			-0.257777	0.0138401	0.194236	0.0498171	0.000146902	0	0	1	0
circ246	circATRNL1_11	chr10	115469329	115120185	+	ENSG00000107518	ATRNL1	down	down_turquoise	down	hsa.miR.130b.5p	up	-0.286115	0.00706556	ENSG00000151835	SACS			-0.344687	0.00148401	0.131742	0.133278	0.00014722	0	0	1	0
circ206	circATRNL1_6	chr10	115268444	115120185	+	ENSG00000107518	ATRNL1	down		down	hsa.miR.148a.3p	up	-0.332569	0.00202179	ENSG00000058091	CDK14	1		-0.285776	0.00712548	0.153693	0.0971069	0.000147354	0	1	1	0
circ27587	circDDX3Y	chrY	12913062	12909360	+	ENSG00000067048	DDX3Y	down		down	hsa.miR.148a.3p	up	-0.340794	0.00158703	ENSG00000049130	KITLG			-0.209955	0.0373077	0.233025	0.0236276	0.000147355	0	0	1	0
circ5511	circARID1A	chr1	26732792	26729651	+	ENSG00000117713	ARID1A	up		up	hsa.miR.204.3p	down	-0.37186	0.000599038	ENSG00000115137	DNAJC27			-0.267617	0.0111783	0.0959187	0.209762	0.000147868	0	0	0	1
circ217	circATRNL1_9	chr10	115315736	115120185	+	ENSG00000107518	ATRNL1	down	down_turquoise	down	hsa.miR.130b.5p	up	-0.298159	0.00520265	ENSG00000184007	PTP4A2			-0.308836	0.00403724	0.177124	0.0669229	0.000147965	0	0	0	1
circ206	circATRNL1_6	chr10	115268444	115120185	+	ENSG00000107518	ATRNL1	down		down	hsa.miR.363.3p	up	-0.317642	0.00308697	ENSG00000029725	RABEP1			-0.300691	0.00499131	0.157761	0.0912643	0.000148013	0	0	1	0
circ217	circATRNL1_9	chr10	115315736	115120185	+	ENSG00000107518	ATRNL1	down	down_turquoise	down	hsa.miR.130b.5p	up	-0.298159	0.00520265	ENSG00000113649	TCERG1			-0.335493	0.00193883	0.128418	0.139457	0.000148059	0	0	1	0
circ27587	circDDX3Y	chrY	12913062	12909360	+	ENSG00000067048	DDX3Y	down		down	hsa.miR.148a.3p	up	-0.340794	0.00158703	ENSG00000131263	RLIM			-0.196148	0.0481399	0.244837	0.0184137	0.000148067	1	0	1	0
circ246	circATRNL1_11	chr10	115469329	115120185	+	ENSG00000107518	ATRNL1	down	down_turquoise	down	hsa.miR.130b.5p	up	-0.286115	0.00706556	ENSG00000110429	FBXO3			-0.342219	0.00159561	0.136478	0.124796	0.00014808	0	0	1	0
circ206	circATRNL1_6	chr10	115268444	115120185	+	ENSG00000107518	ATRNL1	down		down	hsa.miR.363.3p	up	-0.317642	0.00308697	ENSG00000132646	PCNA			-0.27027	0.0105115	0.201624	0.0435812	0.000148735	0	0	1	0
circ27587	circDDX3Y	chrY	12913062	12909360	+	ENSG00000067048	DDX3Y	down		down	hsa.miR.148a.3p	up	-0.340794	0.00158703	ENSG00000087299	L2HGDH			-0.200853	0.0442016	0.24059	0.0201652	0.000148773	0	0	1	0
circ246	circATRNL1_11	chr10	115469329	115120185	+	ENSG00000107518	ATRNL1	down	down_turquoise	down	hsa.miR.107	up	-0.399377	0.00023242	ENSG00000099194	SCD			-0.242842	0.0193421	0.057402	0.314769	0.000148815	0	0	1	0
circ206	circATRNL1_6	chr10	115268444	115120185	+	ENSG00000107518	ATRNL1	down		down	hsa.miR.148a.3p	up	-0.332569	0.00202179	ENSG00000163788	SNRK			-0.255771	0.0144788	0.195841	0.048406	0.000148992	0	0	1	0
circ206	circATRNL1_6	chr10	115268444	115120185	+	ENSG00000107518	ATRNL1	down		down	hsa.miR.363.3p	up	-0.317642	0.00308697	ENSG00000107864	CPEB3			-0.331606	0.00216597	0.0950057	0.211992	0.000149032	0	0	1	0
circ246	circATRNL1_11	chr10	115469329	115120185	+	ENSG00000107518	ATRNL1	down	down_turquoise	down	hsa.miR.148a.3p	up	-0.358576	0.000919439	ENSG00000091140	DLD			-0.195685	0.0485417	0.218316	0.031759	0.000149033	0	0	1	0
circ22472	circRAB23	chr6	57193842	57210445	-	ENSG00000112210	RAB23		down_turquoise	down	hsa.miR.3938	up	-0.19585	0.0483986	ENSG00000143995	MEIS1			-0.434345	7.16618e-05	0.0273024	0.409323	0.000149234	0	0	0	1
circ246	circATRNL1_11	chr10	115469329	115120185	+	ENSG00000107518	ATRNL1	down	down_turquoise	down	hsa.miR.363.3p	up	-0.222003	0.0295342	ENSG00000154305	MIA3			-0.391799	0.00033364	0.125942	0.144184	0.000149333	0	0	1	0
circ12207	circPPP4R1_1	chr18	9583117	9595102	-	ENSG00000154845	PPP4R1	up		up	hsa.miR.619.5p	down	-0.253819	0.0151241	ENSG00000157184	CPT2			-0.362181	0.000873714	0.146834	0.107556	0.000149379	0	0	0	1
circ217	circATRNL1_9	chr10	115315736	115120185	+	ENSG00000107518	ATRNL1	down	down_turquoise	down	hsa.chr5.14497.s	up	-0.251479	0.0159295	ENSG00000186001	LRCH3			-0.370699	0.000622341	0.1262	0.143686	0.000149667	0	0	0	1
circ206	circATRNL1_6	chr10	115268444	115120185	+	ENSG00000107518	ATRNL1	down		down	hsa.let.7g.3p	up	-0.414378	0.000133887	ENSG00000198015	MRPL42			-0.201654	0.043573	0.0820837	0.244976	0.000150094	0	0	1	0
circ246	circATRNL1_11	chr10	115469329	115120185	+	ENSG00000107518	ATRNL1	down	down_turquoise	down	hsa.miR.148a.3p	up	-0.358576	0.000919439	ENSG00000196482	ESRRG			-0.262004	0.0125716	0.137064	0.123772	0.00015023	0	0	0	1
circ246	circATRNL1_11	chr10	115469329	115120185	+	ENSG00000107518	ATRNL1	down	down_turquoise	down	hsa.miR.107	up	-0.399377	0.00023242	ENSG00000140006	WDR89			-0.211712	0.0361329	0.113076	0.17042	0.000150278	0	0	1	0
circ206	circATRNL1_6	chr10	115268444	115120185	+	ENSG00000107518	ATRNL1	down		down	hsa.let.7g.3p	up	-0.414378	0.000133887	ENSG00000131507	NDFIP1			-0.200358	0.0446142	0.083923	0.240122	0.000150561	0	0	1	0
circ500	circSUV39H2	chr10	14897517	14896846	+	ENSG00000152457	DCLRE1C		down_turquoise	down	hsa.miR.450b.5p	up	-0.233641	0.0233285	ENSG00000225973	PIGBOS1			-0.36758	0.000737695	0.163537	0.0834129	0.000150667	0	0	1	0
circ5511	circARID1A	chr1	26732792	26729651	+	ENSG00000117713	ARID1A	up		up	hsa.miR.204.3p	down	-0.37186	0.000599038	ENSG00000172466	ZNF24			-0.25037	0.0164539	0.125187	0.145646	0.000150674	0	0	1	0
circ246	circATRNL1_11	chr10	115469329	115120185	+	ENSG00000107518	ATRNL1	down	down_turquoise	down	hsa.miR.148a.3p	up	-0.358576	0.000919439	ENSG00000132164	SLC6A11			-0.243754	0.0188478	0.163937	0.0828882	0.000150751	0	0	1	0
circ20464	circPPP2R2B	chr5	146691128	146701142	-	ENSG00000156475	PPP2R2B	up		up	hsa.miR.204.3p	down	-0.260596	0.0129827	ENSG00000196844	PATE2			-0.392725	0.000323305	0.0481097	0.343037	0.000151063	0	0	0	1
circ202	circATRNL1_5	chr10	115241725	115120185	+	ENSG00000107518	ATRNL1	down		down	hsa.miR.363.3p	up	-0.209506	0.0376264	ENSG00000145439	CBR4			-0.407473	0.000193549	0.100797	0.198077	0.000151303	0	0	1	0
circ217	circATRNL1_9	chr10	115315736	115120185	+	ENSG00000107518	ATRNL1	down	down_turquoise	down	hsa.chr5.14497.s	up	-0.251479	0.0159295	ENSG00000008294	SPAG9			-0.352388	0.00111575	0.165255	0.081177	0.000151328	0	0	0	1
circ5511	circARID1A	chr1	26732792	26729651	+	ENSG00000117713	ARID1A	up		up	hsa.miR.204.3p	down	-0.37186	0.000599038	ENSG00000151239	TWF1			-0.255183	0.0148047	0.116627	0.162897	0.000151498	0	0	0	1
circ206	circATRNL1_6	chr10	115268444	115120185	+	ENSG00000107518	ATRNL1	down		down	hsa.miR.148a.3p	up	-0.332569	0.00202179	ENSG00000180998	GPR137C	1		-0.287766	0.00678027	0.148206	0.105405	0.000151521	0	1	1	0
circ27587	circDDX3Y	chrY	12913062	12909360	+	ENSG00000067048	DDX3Y	down		down	hsa.miR.148a.3p	up	-0.340794	0.00158703	ENSG00000113448	PDE4D			-0.210541	0.036895	0.230893	0.024687	0.000151574	0	0	1	0
circ3279	circFAT3	chr11	92355404	92352096	+	ENSG00000165323	FAT3	down	down_turquoise	down	hsa.miR.708.5p	up	-0.276348	0.00911154	ENSG00000174705	SH3PXD2B			-0.287455	0.00696455	0.234749	0.0227981	0.000151683	0	0	1	0
circ20464	circPPP2R2B	chr5	146691128	146701142	-	ENSG00000156475	PPP2R2B	up		up	hsa.miR.204.3p	down	-0.260596	0.0129827	ENSG00000154258	ABCA9			-0.374491	0.000591642	0.104842	0.188686	0.000151919	0	0	0	1
circ27587	circDDX3Y	chrY	12913062	12909360	+	ENSG00000067048	DDX3Y	down		down	hsa.miR.148a.3p	up	-0.340794	0.00158703	ENSG00000132164	SLC6A11			-0.243754	0.0188478	0.195782	0.0484576	0.000151932	0	0	1	0
circ246	circATRNL1_11	chr10	115469329	115120185	+	ENSG00000107518	ATRNL1	down	down_turquoise	down	hsa.miR.107	up	-0.399377	0.00023242	ENSG00000198729	PPP1R14C			-0.236394	0.022142	0.0686634	0.281897	0.000152044	0	0	1	0
circ217	circATRNL1_9	chr10	115315736	115120185	+	ENSG00000107518	ATRNL1	down	down_turquoise	down	hsa.miR.130b.5p	up	-0.298159	0.00520265	ENSG00000181555	SETD2			-0.307108	0.004225	0.177885	0.0660781	0.000152204	1	0	1	0
circ27587	circDDX3Y	chrY	12913062	12909360	+	ENSG00000067048	DDX3Y	down		down	hsa.miR.148a.3p	up	-0.340794	0.00158703	ENSG00000157404	KIT			-0.297747	0.00525847	0.111387	0.174073	0.000152224	1	0	1	0
circ246	circATRNL1_11	chr10	115469329	115120185	+	ENSG00000107518	ATRNL1	down	down_turquoise	down	hsa.miR.148a.3p	up	-0.358576	0.000919439	ENSG00000150625	GPM6A			-0.285298	0.00721067	0.0921117	0.21915	0.000152243	0	0	0	1
circ246	circATRNL1_11	chr10	115469329	115120185	+	ENSG00000107518	ATRNL1	down	down_turquoise	down	hsa.miR.148a.3p	up	-0.358576	0.000919439	ENSG00000114573	ATP6V1A			-0.254337	0.0149508	0.147986	0.105747	0.000152309	0	0	1	0
circ21473	circATG5	chr6	106248150	106308491	-	ENSG00000057663	ATG5	down	down_turquoise	down	hsa.miR.450b.5p	up	-0.202514	0.0428739	ENSG00000065809	FAM107B			-0.427095	9.44158e-05	0.042523	0.360468	0.000152808	0	0	1	0
circ5511	circARID1A	chr1	26732792	26729651	+	ENSG00000117713	ARID1A	up		up	hsa.miR.204.3p	down	-0.37186	0.000599038	ENSG00000196510	ANAPC7	1		-0.261045	0.012987	0.105304	0.187631	0.000152857	0	0	0	1
circ206	circATRNL1_6	chr10	115268444	115120185	+	ENSG00000107518	ATRNL1	down		down	hsa.miR.148a.3p	up	-0.332569	0.00202179	ENSG00000088682	COQ9			-0.235285	0.0225454	0.217866	0.0320393	0.000152921	0	0	1	0
circ206	circATRNL1_6	chr10	115268444	115120185	+	ENSG00000107518	ATRNL1	down		down	hsa.miR.148a.3p	up	-0.332569	0.00202179	ENSG00000138078	PREPL	1		-0.25662	0.0142056	0.193004	0.050921	0.000153108	0	1	1	0
circ246	circATRNL1_11	chr10	115469329	115120185	+	ENSG00000107518	ATRNL1	down	down_turquoise	down	hsa.miR.148a.3p	up	-0.358576	0.000919439	ENSG00000077254	USP33	1		-0.251282	0.0159989	0.152121	0.0994347	0.000153126	0	1	1	0
circ3518	circEIF4G3_1	chr1	20893517	20942330	-	ENSG00000075151	EIF4G3	down		down	hsa.miR.10a.5p	up	-0.230139	0.0250709	ENSG00000127995	CASD1	1		-0.3835	0.000440717	0.132201	0.132441	0.000153186	0	1	0	0
circ246	circATRNL1_11	chr10	115469329	115120185	+	ENSG00000107518	ATRNL1	down	down_turquoise	down	hsa.miR.130b.5p	up	-0.286115	0.00706556	ENSG00000123700	KCNJ2			-0.355054	0.00108786	0.104052	0.1905	0.000153266	1	0	0	0
circ246	circATRNL1_11	chr10	115469329	115120185	+	ENSG00000107518	ATRNL1	down	down_turquoise	down	hsa.miR.130b.5p	up	-0.286115	0.00706556	ENSG00000185129	PURA			-0.351938	0.00119552	0.111672	0.173453	0.000153349	0	0	1	0
circ246	circATRNL1_11	chr10	115469329	115120185	+	ENSG00000107518	ATRNL1	down	down_turquoise	down	hsa.miR.107	up	-0.399377	0.00023242	ENSG00000171202	TMEM126A			-0.21239	0.0356702	0.110145	0.176791	0.000153395	0	0	1	0
circ202	circATRNL1_5	chr10	115241725	115120185	+	ENSG00000107518	ATRNL1	down		down	hsa.miR.363.3p	up	-0.209506	0.0376264	ENSG00000107036	RIC1			-0.422652	0.000111479	0.0456812	0.350577	0.000153832	0	0	1	0
circ246	circATRNL1_11	chr10	115469329	115120185	+	ENSG00000107518	ATRNL1	down	down_turquoise	down	hsa.miR.107	up	-0.399377	0.00023242	ENSG00000145354	CISD2			-0.20042	0.0445642	0.126991	0.142169	0.000154013	0	0	1	0
circ217	circATRNL1_9	chr10	115315736	115120185	+	ENSG00000107518	ATRNL1	down	down_turquoise	down	hsa.miR.130b.5p	up	-0.298159	0.00520265	ENSG00000165629	ATP5C1			-0.315902	0.00334366	0.162551	0.0847171	0.000154122	0	0	1	0
circ3518	circEIF4G3_1	chr1	20893517	20942330	-	ENSG00000075151	EIF4G3	down		down	hsa.miR.107	up	-0.218595	0.0315857	ENSG00000197763	TXNRD3			-0.375663	0.000569649	0.164687	0.0819111	0.000154129	0	0	1	0
circ246	circATRNL1_11	chr10	115469329	115120185	+	ENSG00000107518	ATRNL1	down	down_turquoise	down	hsa.miR.363.3p	up	-0.222003	0.0295342	ENSG00000067208	EVI5			-0.390288	0.000351171	0.126945	0.142257	0.000154275	0	0	1	0
circ206	circATRNL1_6	chr10	115268444	115120185	+	ENSG00000107518	ATRNL1	down		down	hsa.miR.363.3p	up	-0.317642	0.00308697	ENSG00000128573	FOXP2			-0.3155	0.00338001	0.127381	0.141425	0.000154293	1	0	1	0
circ27587	circDDX3Y	chrY	12913062	12909360	+	ENSG00000067048	DDX3Y	down		down	hsa.chr5.14497.s	up	-0.242594	0.0193225	ENSG00000109339	MAPK10			-0.29281	0.00596926	0.261189	0.0128082	0.000154444	0	0	0	1
circ27587	circDDX3Y	chrY	12913062	12909360	+	ENSG00000067048	DDX3Y	down		down	hsa.miR.148a.3p	up	-0.340794	0.00158703	ENSG00000140307	GTF2A2			-0.271769	0.0100126	0.156456	0.0931095	0.000154645	0	0	1	0
circ5511	circARID1A	chr1	26732792	26729651	+	ENSG00000117713	ARID1A	up		up	hsa.miR.204.3p	down	-0.37186	0.000599038	ENSG00000197430	OPALIN			-0.205294	0.0407508	0.182913	0.0606991	0.000154844	0	0	0	1
circ206	circATRNL1_6	chr10	115268444	115120185	+	ENSG00000107518	ATRNL1	down		down	hsa.miR.363.3p	up	-0.317642	0.00308697	ENSG00000168246	UBTD2			-0.31331	0.00358477	0.131356	0.133987	0.000154931	0	0	1	0
circ206	circATRNL1_6	chr10	115268444	115120185	+	ENSG00000107518	ATRNL1	down		down	hsa.let.7g.3p	up	-0.414378	0.000133887	ENSG00000180185	FAHD1			-0.207022	0.0394635	0.0690526	0.28079	0.000155011	0	0	0	1
circ206	circATRNL1_6	chr10	115268444	115120185	+	ENSG00000107518	ATRNL1	down		down	hsa.miR.363.3p	up	-0.317642	0.00308697	ENSG00000115020	PIKFYVE			-0.327286	0.0024459	0.101178	0.19718	0.000155479	0	0	1	0
circ246	circATRNL1_11	chr10	115469329	115120185	+	ENSG00000107518	ATRNL1	down	down_turquoise	down	hsa.miR.148a.3p	up	-0.358576	0.000919439	ENSG00000164405	UQCRQ			-0.262451	0.0124433	0.133331	0.13039	0.000155746	0	0	1	0
circ206	circATRNL1_6	chr10	115268444	115120185	+	ENSG00000107518	ATRNL1	down		down	hsa.miR.363.3p	up	-0.317642	0.00308697	ENSG00000217128	FNIP1			-0.310657	0.0038474	0.135829	0.125936	0.000156102	0	0	1	0
circ27587	circDDX3Y	chrY	12913062	12909360	+	ENSG00000067048	DDX3Y	down		down	hsa.miR.148a.3p	up	-0.340794	0.00158703	ENSG00000172020	GAP43			-0.253056	0.0153829	0.182294	0.0613426	0.000156268	1	0	0	0
circ3518	circEIF4G3_1	chr1	20893517	20942330	-	ENSG00000075151	EIF4G3	down		down	hsa.miR.3938	up	-0.295345	0.0055946	ENSG00000239521	GATS			-0.368567	0.000715006	0.0378267	0.375346	0.000156617	0	0	0	1
circ27587	circDDX3Y	chrY	12913062	12909360	+	ENSG00000067048	DDX3Y	down		down	hsa.miR.148a.3p	up	-0.340794	0.00158703	ENSG00000149212	SESN3			-0.217545	0.0322411	0.222221	0.0294065	0.000156906	0	0	1	0
circ206	circATRNL1_6	chr10	115268444	115120185	+	ENSG00000107518	ATRNL1	down		down	hsa.miR.363.3p	up	-0.317642	0.00308697	ENSG00000156603	MED19			-0.304702	0.00449931	0.146335	0.108346	0.000156922	0	0	1	0
circ19323	circGRK4	chr4	3029409	2984513	+	ENSG00000125388	GRK4	down		down	hsa.miR.450b.5p	up	-0.198287	0.046317	ENSG00000164176	EDIL3			-0.419999	0.000122982	0.0749114	0.264386	0.000157025	0	0	1	0
circ246	circATRNL1_11	chr10	115469329	115120185	+	ENSG00000107518	ATRNL1	down	down_turquoise	down	hsa.miR.130b.5p	up	-0.286115	0.00706556	ENSG00000135333	EPHA7			-0.377083	0.000544021	0.0326425	0.391982	0.00015709	0	0	1	0
circ206	circATRNL1_6	chr10	115268444	115120185	+	ENSG00000107518	ATRNL1	down		down	hsa.let.7g.3p	up	-0.414378	0.000133887	ENSG00000183780	SLC35F3			-0.224762	0.0280416	0.0296318	0.401735	0.000157231	0	0	0	1
circ217	circATRNL1_9	chr10	115315736	115120185	+	ENSG00000107518	ATRNL1	down	down_turquoise	down	hsa.miR.130b.5p	up	-0.298159	0.00520265	ENSG00000100554	ATP6V1D			-0.290232	0.00650207	0.200359	0.0446026	0.000157279	0	0	0	1
circ206	circATRNL1_6	chr10	115268444	115120185	+	ENSG00000107518	ATRNL1	down		down	hsa.miR.148a.3p	up	-0.332569	0.00202179	ENSG00000140307	GTF2A2			-0.271769	0.0100126	0.170558	0.0745535	0.000157314	0	0	1	0
circ206	circATRNL1_6	chr10	115268444	115120185	+	ENSG00000107518	ATRNL1	down		down	hsa.miR.363.3p	up	-0.317642	0.00308697	ENSG00000146731	CCT6A			-0.309793	0.00393649	0.136718	0.124377	0.000157512	0	0	1	0
circ27587	circDDX3Y	chrY	12913062	12909360	+	ENSG00000067048	DDX3Y	down		down	hsa.miR.148a.3p	up	-0.340794	0.00158703	ENSG00000143061	IGSF3			-0.273203	0.00967696	0.152747	0.0985032	0.000157635	0	0	1	0
circ246	circATRNL1_11	chr10	115469329	115120185	+	ENSG00000107518	ATRNL1	down	down_turquoise	down	hsa.miR.107	up	-0.399377	0.00023242	ENSG00000171204	TMEM126B			-0.194064	0.0499545	0.133285	0.130473	0.000157821	0	0	1	0
circ246	circATRNL1_11	chr10	115469329	115120185	+	ENSG00000107518	ATRNL1	down	down_turquoise	down	hsa.miR.148a.3p	up	-0.358576	0.000919439	ENSG00000097046	CDC7			-0.244186	0.0186737	0.159788	0.0884506	0.000158161	0	0	1	0
circ5511	circARID1A	chr1	26732792	26729651	+	ENSG00000117713	ARID1A	up		up	hsa.miR.204.3p	down	-0.37186	0.000599038	ENSG00000102309	PIN4			-0.242472	0.0194944	0.133429	0.130214	0.00015834	0	0	0	1
circ202	circATRNL1_5	chr10	115241725	115120185	+	ENSG00000107518	ATRNL1	down		down	hsa.miR.363.3p	up	-0.209506	0.0376264	ENSG00000152443	ZNF776			-0.410002	0.000176844	0.0883626	0.228621	0.000158395	0	0	1	0
circ5511	circARID1A	chr1	26732792	26729651	+	ENSG00000117713	ARID1A	up		up	hsa.miR.204.3p	down	-0.37186	0.000599038	ENSG00000103184	SEC14L5	1		-0.267555	0.0111942	0.0890424	0.226887	0.000158413	0	0	0	1
circ27587	circDDX3Y	chrY	12913062	12909360	+	ENSG00000067048	DDX3Y	down		down	hsa.chr5.14497.s	up	-0.242594	0.0193225	ENSG00000163577	EIF5A2	1		-0.34995	0.00120285	0.17821	0.06572	0.000158953	0	1	0	0
circ217	circATRNL1_9	chr10	115315736	115120185	+	ENSG00000107518	ATRNL1	down	down_turquoise	down	hsa.chr5.14497.s	up	-0.251479	0.0159295	ENSG00000183023	SLC8A1	1		-0.318403	0.00302256	0.218332	0.0317487	0.000159058	0	1	0	0
circ246	circATRNL1_11	chr10	115469329	115120185	+	ENSG00000107518	ATRNL1	down	down_turquoise	down	hsa.miR.130b.5p	up	-0.286115	0.00706556	ENSG00000001631	KRIT1			-0.367241	0.000745644	0.0656089	0.290652	0.000159294	0	0	1	0
circ246	circATRNL1_11	chr10	115469329	115120185	+	ENSG00000107518	ATRNL1	down	down_turquoise	down	hsa.miR.107	up	-0.399377	0.00023242	ENSG00000121022	COPS5			-0.204122	0.0416433	0.118877	0.158242	0.000159322	0	0	1	0
circ246	circATRNL1_11	chr10	115469329	115120185	+	ENSG00000107518	ATRNL1	down	down_turquoise	down	hsa.miR.148a.3p	up	-0.358576	0.000919439	ENSG00000103769	RAB11A			-0.264349	0.0119113	0.128194	0.139881	0.000159354	0	0	1	0
circ202	circATRNL1_5	chr10	115241725	115120185	+	ENSG00000107518	ATRNL1	down		down	hsa.miR.363.3p	up	-0.209506	0.0376264	ENSG00000071189	SNX13			-0.40448	0.000215174	0.104574	0.1893	0.000159415	0	0	1	0
circ246	circATRNL1_11	chr10	115469329	115120185	+	ENSG00000107518	ATRNL1	down	down_turquoise	down	hsa.miR.107	up	-0.399377	0.00023242	ENSG00000112697	TMEM30A			-0.21094	0.0366646	0.108433	0.18058	0.000159971	0	0	1	0
circ206	circATRNL1_6	chr10	115268444	115120185	+	ENSG00000107518	ATRNL1	down		down	hsa.miR.363.3p	up	-0.317642	0.00308697	ENSG00000115289	PCGF1			-0.313001	0.00361448	0.129205	0.137979	0.000160035	0	0	1	0
circ246	circATRNL1_11	chr10	115469329	115120185	+	ENSG00000107518	ATRNL1	down	down_turquoise	down	hsa.miR.107	up	-0.399377	0.00023242	ENSG00000021574	SPAST			-0.21708	0.0326022	0.0986371	0.203202	0.000160054	1	0	1	0
circ15905	circNRXN1_3	chr2	50472298	50620183	-	ENSG00000179915	NRXN1	down		down	hsa.miR.708.5p	up	-0.216171	0.0331142	ENSG00000004799	PDK4			-0.347711	0.00135687	0.214374	0.0342855	0.000160122	0	0	1	0
circ5511	circARID1A	chr1	26732792	26729651	+	ENSG00000117713	ARID1A	up		up	hsa.miR.204.3p	down	-0.37186	0.000599038	ENSG00000090612	ZNF268			-0.256047	0.014524	0.109878	0.177379	0.00016037	0	0	0	1
circ206	circATRNL1_6	chr10	115268444	115120185	+	ENSG00000107518	ATRNL1	down		down	hsa.let.7g.3p	up	-0.414378	0.000133887	ENSG00000143179	UCK2			-0.228002	0.0262819	0.0181906	0.439297	0.000160596	0	0	0	1
circ27587	circDDX3Y	chrY	12913062	12909360	+	ENSG00000067048	DDX3Y	down		down	hsa.miR.148a.3p	up	-0.340794	0.00158703	ENSG00000068366	ACSL4			-0.234313	0.0230056	0.203103	0.0424101	0.00016083	1	0	1	0
circ217	circATRNL1_9	chr10	115315736	115120185	+	ENSG00000107518	ATRNL1	down	down_turquoise	down	hsa.miR.130b.5p	up	-0.298159	0.00520265	ENSG00000184305	CCSER1			-0.267062	0.0113223	0.227756	0.0263168	0.000160991	0	0	0	1
circ27587	circDDX3Y	chrY	12913062	12909360	+	ENSG00000067048	DDX3Y	down		down	hsa.miR.148a.3p	up	-0.340794	0.00158703	ENSG00000078304	PPP2R5C			-0.220645	0.0303382	0.217552	0.0322367	0.000161161	0	0	1	0
circ246	circATRNL1_11	chr10	115469329	115120185	+	ENSG00000107518	ATRNL1	down	down_turquoise	down	hsa.miR.107	up	-0.399377	0.00023242	ENSG00000132975	GPR12	1		-0.234604	0.0229761	0.0655472	0.29083	0.000161246	0	1	0	0
circ5511	circARID1A	chr1	26732792	26729651	+	ENSG00000117713	ARID1A	up		up	hsa.miR.204.3p	down	-0.37186	0.000599038	ENSG00000228716	DHFR			-0.253301	0.0154321	0.114134	0.168157	0.000161375	0	0	0	1
circ18268	circCCDC66_1	chr3	56567053	56566594	+	ENSG00000180376	CCDC66	down		down	hsa.miR.23a.3p	up	-0.256009	0.0144019	ENSG00000114374	USP9Y	1		-0.353079	0.00115502	0.156183	0.0934995	0.000161447	1	1	1	0
circ246	circATRNL1_11	chr10	115469329	115120185	+	ENSG00000107518	ATRNL1	down	down_turquoise	down	hsa.miR.107	up	-0.399377	0.00023242	ENSG00000171960	PPIH			-0.228742	0.0258928	0.0770708	0.258462	0.000161457	0	0	1	0
circ246	circATRNL1_11	chr10	115469329	115120185	+	ENSG00000107518	ATRNL1	down	down_turquoise	down	hsa.miR.130b.5p	up	-0.286115	0.00706556	ENSG00000162368	CMPK1			-0.345366	0.00145458	0.122162	0.151598	0.00016169	0	0	1	0
circ5511	circARID1A	chr1	26732792	26729651	+	ENSG00000117713	ARID1A	up		up	hsa.miR.204.3p	down	-0.37186	0.000599038	ENSG00000102678	FGF9			-0.27965	0.00842073	0.0593299	0.309029	0.000161763	0	0	0	1
circ246	circATRNL1_11	chr10	115469329	115120185	+	ENSG00000107518	ATRNL1	down	down_turquoise	down	hsa.miR.130b.5p	up	-0.286115	0.00706556	ENSG00000090612	ZNF268			-0.307201	0.00421475	0.191427	0.0523621	0.000161805	0	0	0	1
circ3279	circFAT3	chr11	92355404	92352096	+	ENSG00000165323	FAT3	down	down_turquoise	down	hsa.miR.708.5p	up	-0.276348	0.00911154	ENSG00000168884	TNIP2		1	-0.360268	0.000927091	0.106623	0.184639	0.000161838	1	0	1	0
circ206	circATRNL1_6	chr10	115268444	115120185	+	ENSG00000107518	ATRNL1	down		down	hsa.let.7g.3p	up	-0.414378	0.000133887	ENSG00000204406	MBD5			-0.232445	0.0240173	0.00419303	0.485957	0.000162103	1	0	0	0
circ246	circATRNL1_11	chr10	115469329	115120185	+	ENSG00000107518	ATRNL1	down	down_turquoise	down	hsa.miR.107	up	-0.399377	0.00023242	ENSG00000144746	ARL6IP5			-0.203906	0.0418094	0.117627	0.160817	0.000162108	0	0	1	0
circ5511	circARID1A	chr1	26732792	26729651	+	ENSG00000117713	ARID1A	up		up	hsa.miR.204.3p	down	-0.37186	0.000599038	ENSG00000178397	FAM220A	1		-0.242811	0.0193548	0.13092	0.13479	0.000162115	0	0	0	1
circ246	circATRNL1_11	chr10	115469329	115120185	+	ENSG00000107518	ATRNL1	down	down_turquoise	down	hsa.miR.107	up	-0.399377	0.00023242	ENSG00000101856	PGRMC1			-0.223621	0.0286842	0.0861107	0.234417	0.000162117	0	0	1	0
circ217	circATRNL1_9	chr10	115315736	115120185	+	ENSG00000107518	ATRNL1	down	down_turquoise	down	hsa.chr5.14497.s	up	-0.251479	0.0159295	ENSG00000115145	STAM2			-0.341558	0.00155124	0.180492	0.0632456	0.000162119	0	0	0	1
circ246	circATRNL1_11	chr10	115469329	115120185	+	ENSG00000107518	ATRNL1	down	down_turquoise	down	hsa.miR.107	up	-0.399377	0.00023242	ENSG00000174106	LEMD3			-0.199772	0.0450916	0.123397	0.14915	0.000162145	0	0	1	0
circ17709	circSLC4A7_1	chr3	27379249	27424152	-	ENSG00000033867	SLC4A7	down		down	hsa.miR.629.5p	up	-0.197751	0.0467681	ENSG00000173905	GOLIM4			-0.422991	0.000110082	0.0610269	0.304013	0.000162327	0	0	1	0
circ246	circATRNL1_11	chr10	115469329	115120185	+	ENSG00000107518	ATRNL1	down	down_turquoise	down	hsa.miR.148a.3p	up	-0.358576	0.000919439	ENSG00000140307	GTF2A2			-0.271769	0.0100126	0.113215	0.170121	0.000162414	0	0	1	0
circ246	circATRNL1_11	chr10	115469329	115120185	+	ENSG00000107518	ATRNL1	down	down_turquoise	down	hsa.miR.107	up	-0.399377	0.00023242	ENSG00000177189	RPS6KA3			-0.217389	0.0324081	0.096647	0.207992	0.000162461	1	0	1	0
circ206	circATRNL1_6	chr10	115268444	115120185	+	ENSG00000107518	ATRNL1	down		down	hsa.miR.148a.3p	up	-0.332569	0.00202179	ENSG00000135940	COX5B			-0.227356	0.026531	0.222449	0.0292738	0.000162781	0	0	1	0
circ246	circATRNL1_11	chr10	115469329	115120185	+	ENSG00000107518	ATRNL1	down	down_turquoise	down	hsa.miR.148a.3p	up	-0.358576	0.000919439	ENSG00000102900	NUP93			-0.201069	0.0440271	0.207888	0.0387926	0.00016279	0	0	1	0
circ246	circATRNL1_11	chr10	115469329	115120185	+	ENSG00000107518	ATRNL1	down	down_turquoise	down	hsa.miR.107	up	-0.399377	0.00023242	ENSG00000147180	ZNF711			-0.221554	0.0298785	0.0893349	0.226143	0.000162797	0	0	1	0
circ246	circATRNL1_11	chr10	115469329	115120185	+	ENSG00000107518	ATRNL1	down	down_turquoise	down	hsa.miR.148a.3p	up	-0.358576	0.000919439	ENSG00000085365	SCAMP1			-0.259952	0.0131745	0.133655	0.129806	0.00016297	0	0	1	0
circ3518	circEIF4G3_1	chr1	20893517	20942330	-	ENSG00000075151	EIF4G3	down		down	hsa.miR.3938	up	-0.295345	0.0055946	ENSG00000148158	SNX30			-0.362767	0.000857921	0.052874	0.328424	0.000163326	0	0	0	1
circ219	circATRNL1_10	chr10	115315736	115215697	+	ENSG00000107518	ATRNL1		down_turquoise	down	hsa.miR.708.5p	up	-0.199181	0.0455711	ENSG00000101888	NXT2			-0.407565	0.000192913	0.108981	0.179361	0.000163368	0	0	1	0
circ246	circATRNL1_11	chr10	115469329	115120185	+	ENSG00000107518	ATRNL1	down	down_turquoise	down	hsa.miR.107	up	-0.399377	0.00023242	ENSG00000115828	QPCT			-0.213748	0.0347591	0.101954	0.195364	0.000163499	0	0	1	0
circ16286	circZNF638_2	chr2	71427414	71426460	+	ENSG00000075292	ZNF638	down		down	hsa.miR.766.3p	up	-0.311524	0.00365004	ENSG00000198604	BAZ1A			-0.35817	0.000989003	0.0187913	0.437309	0.000163531	0	0	1	0
circ27587	circDDX3Y	chrY	12913062	12909360	+	ENSG00000067048	DDX3Y	down		down	hsa.chr5.14497.s	up	-0.242594	0.0193225	ENSG00000139505	MTMR6			-0.295788	0.00553122	0.254795	0.0147988	0.0001638	0	0	0	1
circ246	circATRNL1_11	chr10	115469329	115120185	+	ENSG00000107518	ATRNL1	down	down_turquoise	down	hsa.miR.107	up	-0.399377	0.00023242	ENSG00000168092	PAFAH1B2			-0.194465	0.0495999	0.12949	0.137445	0.00016405	0	0	1	0
circ206	circATRNL1_6	chr10	115268444	115120185	+	ENSG00000107518	ATRNL1	down		down	hsa.miR.363.3p	up	-0.317642	0.00308697	ENSG00000132300	PTCD3			-0.318246	0.00313797	0.116002	0.164205	0.0001646	0	0	1	0
circ246	circATRNL1_11	chr10	115469329	115120185	+	ENSG00000107518	ATRNL1	down	down_turquoise	down	hsa.miR.107	up	-0.399377	0.00023242	ENSG00000125249	RAP2A			-0.215599	0.033547	0.0982977	0.204015	0.000164606	0	0	1	0
circ246	circATRNL1_11	chr10	115469329	115120185	+	ENSG00000107518	ATRNL1	down	down_turquoise	down	hsa.miR.708.5p	up	-0.280353	0.00814435	ENSG00000187837	HIST1H1C			-0.318586	0.00310915	0.180892	0.0628191	0.000164607	0	0	1	0
circ7886	circVRK1	chr14	96860735	96833467	+	ENSG00000100749	VRK1		down_turquoise	down	hsa.miR.450b.5p	up	-0.273195	0.00967881	ENSG00000143486	EIF2D			-0.34984	0.00127332	0.133995	0.129197	0.000164744	0	0	1	0
circ246	circATRNL1_11	chr10	115469329	115120185	+	ENSG00000107518	ATRNL1	down	down_turquoise	down	hsa.miR.107	up	-0.399377	0.00023242	ENSG00000135750	KCNK1			-0.230871	0.0248002	0.0706225	0.276347	0.000164801	0	0	1	0
circ246	circATRNL1_11	chr10	115469329	115120185	+	ENSG00000107518	ATRNL1	down	down_turquoise	down	hsa.miR.107	up	-0.399377	0.00023242	ENSG00000115760	BIRC6			-0.210292	0.0371161	0.106597	0.184697	0.000164837	1	0	1	0
circ20873	circPARP8	chr5	50763242	50750151	+	ENSG00000151883	PARP8	down		down	hsa.miR.363.3p	up	-0.202403	0.0429616	ENSG00000165813	CCDC186			-0.428854	8.83543e-05	0.0241053	0.41979	0.000164852	0	0	1	0
circ19323	circGRK4	chr4	3029409	2984513	+	ENSG00000125388	GRK4	down		down	hsa.miR.450b.5p	up	-0.198287	0.046317	ENSG00000174628	IQCK			-0.389979	0.00035485	0.153634	0.0971926	0.000165205	0	0	1	0
circ20873	circPARP8	chr5	50763242	50750151	+	ENSG00000151883	PARP8	down		down	hsa.miR.363.3p	up	-0.202403	0.0429616	ENSG00000183475	ASB7			-0.411823	0.000165656	0.0899011	0.224707	0.000165364	0	0	1	0
circ5511	circARID1A	chr1	26732792	26729651	+	ENSG00000117713	ARID1A	up		up	hsa.miR.204.3p	down	-0.37186	0.000599038	ENSG00000125037	EMC3			-0.256356	0.0144249	0.106305	0.185359	0.000165585	0	0	1	0
circ5511	circARID1A	chr1	26732792	26729651	+	ENSG00000117713	ARID1A	up		up	hsa.miR.204.3p	down	-0.37186	0.000599038	ENSG00000102978	POLR2C			-0.232506	0.023987	0.144323	0.111574	0.000165722	0	0	0	1
circ27587	circDDX3Y	chrY	12913062	12909360	+	ENSG00000067048	DDX3Y	down		down	hsa.miR.148a.3p	up	-0.340794	0.00158703	ENSG00000118507	AKAP7			-0.229762	0.0252647	0.20626	0.0399947	0.000165757	0	0	1	0
circ27587	circDDX3Y	chrY	12913062	12909360	+	ENSG00000067048	DDX3Y	down		down	hsa.miR.148a.3p	up	-0.340794	0.00158703	ENSG00000171189	GRIK1			-0.292456	0.00602341	0.114153	0.168115	0.000166064	0	0	0	1
circ5511	circARID1A	chr1	26732792	26729651	+	ENSG00000117713	ARID1A	up		up	hsa.miR.204.3p	down	-0.37186	0.000599038	ENSG00000136758	YME1L1			-0.260181	0.0132423	0.0988249	0.202754	0.00016618	0	0	0	1
circ27587	circDDX3Y	chrY	12913062	12909360	+	ENSG00000067048	DDX3Y	down		down	hsa.miR.148a.3p	up	-0.340794	0.00158703	ENSG00000187240	DYNC2H1			-0.209446	0.0376691	0.226663	0.026905	0.000166186	0	0	1	0
circ217	circATRNL1_9	chr10	115315736	115120185	+	ENSG00000107518	ATRNL1	down	down_turquoise	down	hsa.miR.130b.5p	up	-0.298159	0.00520265	ENSG00000116406	EDEM3			-0.339411	0.00173165	0.109344	0.178557	0.000166205	0	0	1	0
circ20873	circPARP8	chr5	50763242	50750151	+	ENSG00000151883	PARP8	down		down	hsa.miR.363.3p	up	-0.202403	0.0429616	ENSG00000175265	GOLGA8A			-0.350056	0.0012651	0.221884	0.0296036	0.000166234	0	0	1	0
circ246	circATRNL1_11	chr10	115469329	115120185	+	ENSG00000107518	ATRNL1	down	down_turquoise	down	hsa.miR.130b.5p	up	-0.286115	0.00706556	ENSG00000136243	NUPL2			-0.304887	0.00447767	0.193063	0.0508681	0.000166265	0	0	1	0
circ246	circATRNL1_11	chr10	115469329	115120185	+	ENSG00000107518	ATRNL1	down	down_turquoise	down	hsa.miR.363.3p	up	-0.222003	0.0295342	ENSG00000113441	LNPEP			-0.392817	0.000322288	0.113647	0.169196	0.000166369	0	0	1	0
circ217	circATRNL1_9	chr10	115315736	115120185	+	ENSG00000107518	ATRNL1	down	down_turquoise	down	hsa.miR.130b.5p	up	-0.298159	0.00520265	ENSG00000070718	AP3M2			-0.296619	0.00553847	0.187665	0.0559292	0.000166466	0	0	0	1
circ5511	circARID1A	chr1	26732792	26729651	+	ENSG00000117713	ARID1A	up		up	hsa.miR.204.3p	down	-0.37186	0.000599038	ENSG00000134970	TMED7			-0.279927	0.00836474	0.0550262	0.321904	0.000166591	0	0	0	1
circ217	circATRNL1_9	chr10	115315736	115120185	+	ENSG00000107518	ATRNL1	down	down_turquoise	down	hsa.miR.130b.5p	up	-0.298159	0.00520265	ENSG00000103769	RAB11A			-0.304733	0.00449569	0.1751	0.0692093	0.000167105	0	0	1	0
circ5511	circARID1A	chr1	26732792	26729651	+	ENSG00000117713	ARID1A	up		up	hsa.miR.204.3p	down	-0.37186	0.000599038	ENSG00000111554	MDM1			-0.276101	0.0091651	0.0639987	0.295316	0.000167335	0	0	0	1
circ15905	circNRXN1_3	chr2	50472298	50620183	-	ENSG00000179915	NRXN1	down		down	hsa.miR.708.5p	up	-0.216171	0.0331142	ENSG00000180370	PAK2			-0.310009	0.00391405	0.262126	0.0125363	0.000167644	0	0	1	0
circ18268	circCCDC66_1	chr3	56567053	56566594	+	ENSG00000180376	CCDC66	down		down	hsa.miR.23a.3p	up	-0.256009	0.0144019	ENSG00000101333	PLCB4			-0.394144	0.000308025	0.0406159	0.366486	0.000167728	0	0	1	0
circ246	circATRNL1_11	chr10	115469329	115120185	+	ENSG00000107518	ATRNL1	down	down_turquoise	down	hsa.miR.148a.3p	up	-0.358576	0.000919439	ENSG00000176204	LRRTM4			-0.256466	0.014255	0.136864	0.124122	0.00016782	0	0	0	1
circ27587	circDDX3Y	chrY	12913062	12909360	+	ENSG00000067048	DDX3Y	down		down	hsa.miR.148a.3p	up	-0.340794	0.00158703	ENSG00000112541	PDE10A	1		-0.28846	0.00666329	0.120775	0.154381	0.000168329	0	1	1	0
circ206	circATRNL1_6	chr10	115268444	115120185	+	ENSG00000107518	ATRNL1	down		down	hsa.miR.148a.3p	up	-0.332569	0.00202179	ENSG00000162929	KIAA1841	1		-0.32027	0.00286961	0.068694	0.281809	0.000168545	0	1	0	0
circ17709	circSLC4A7_1	chr3	27379249	27424152	-	ENSG00000033867	SLC4A7	down		down	hsa.miR.708.5p	up	-0.197115	0.0473089	ENSG00000101888	NXT2			-0.407565	0.000192913	0.10892	0.179497	0.000168829	0	0	1	0
circ206	circATRNL1_6	chr10	115268444	115120185	+	ENSG00000107518	ATRNL1	down		down	hsa.miR.148a.3p	up	-0.332569	0.00202179	ENSG00000163138	PACRGL			-0.262713	0.0123686	0.17829	0.0656321	0.0001691	0	0	1	0
circ246	circATRNL1_11	chr10	115469329	115120185	+	ENSG00000107518	ATRNL1	down	down_turquoise	down	hsa.miR.130b.5p	up	-0.286115	0.00706556	ENSG00000143951	WDPCP			-0.344903	0.00147459	0.118969	0.158052	0.000169586	0	0	1	0
circ27587	circDDX3Y	chrY	12913062	12909360	+	ENSG00000067048	DDX3Y	down		down	hsa.miR.148a.3p	up	-0.340794	0.00158703	ENSG00000164466	SFXN1			-0.203383	0.0421916	0.231056	0.0246047	0.000169657	0	0	1	0
circ202	circATRNL1_5	chr10	115241725	115120185	+	ENSG00000107518	ATRNL1	down		down	hsa.miR.363.3p	up	-0.209506	0.0376264	ENSG00000183475	ASB7			-0.411823	0.000165656	0.0749023	0.264411	0.000169707	0	0	1	0
circ5511	circARID1A	chr1	26732792	26729651	+	ENSG00000117713	ARID1A	up		up	hsa.miR.204.3p	down	-0.37186	0.000599038	ENSG00000196418	ZNF124			-0.273448	0.00975815	0.0686041	0.282065	0.000169772	0	0	0	1
circ27587	circDDX3Y	chrY	12913062	12909360	+	ENSG00000067048	DDX3Y	down		down	hsa.miR.148a.3p	up	-0.340794	0.00158703	ENSG00000091140	DLD			-0.195685	0.0485417	0.237743	0.0214153	0.000169857	0	0	1	0
circ27587	circDDX3Y	chrY	12913062	12909360	+	ENSG00000067048	DDX3Y	down		down	hsa.miR.148a.3p	up	-0.340794	0.00158703	ENSG00000086289	EPDR1			-0.231937	0.0241632	0.202323	0.0430252	0.00016987	0	0	1	0
circ217	circATRNL1_9	chr10	115315736	115120185	+	ENSG00000107518	ATRNL1	down	down_turquoise	down	hsa.miR.130b.5p	up	-0.298159	0.00520265	ENSG00000102893	PHKB			-0.289985	0.00654207	0.195728	0.0485041	0.000169956	0	0	1	0
circ217	circATRNL1_9	chr10	115315736	115120185	+	ENSG00000107518	ATRNL1	down	down_turquoise	down	hsa.miR.130b.5p	up	-0.298159	0.00520265	ENSG00000136243	NUPL2			-0.304887	0.00447767	0.173643	0.0708916	0.000170008	0	0	1	0
circ7886	circVRK1	chr14	96860735	96833467	+	ENSG00000100749	VRK1		down_turquoise	down	hsa.miR.450b.5p	up	-0.273195	0.00967881	ENSG00000170242	USP47			-0.334969	0.00196818	0.161053	0.0867269	0.000170065	0	0	1	0
circ3279	circFAT3	chr11	92355404	92352096	+	ENSG00000165323	FAT3	down	down_turquoise	down	hsa.miR.708.5p	up	-0.276348	0.00911154	ENSG00000173039	RELA		1	-0.292484	0.00614679	0.222058	0.029502	0.000170082	0	0	1	0
circ27587	circDDX3Y	chrY	12913062	12909360	+	ENSG00000067048	DDX3Y	down		down	hsa.miR.148a.3p	up	-0.340794	0.00158703	ENSG00000115561	CHMP3			-0.237337	0.0215988	0.19601	0.0482598	0.000170254	0	0	1	0
circ217	circATRNL1_9	chr10	115315736	115120185	+	ENSG00000107518	ATRNL1	down	down_turquoise	down	hsa.miR.130b.5p	up	-0.298159	0.00520265	ENSG00000121486	TRMT1L			-0.33284	0.00209142	0.121731	0.15246	0.000170666	0	0	0	1
circ246	circATRNL1_11	chr10	115469329	115120185	+	ENSG00000107518	ATRNL1	down	down_turquoise	down	hsa.miR.363.3p	up	-0.222003	0.0295342	ENSG00000171862	PTEN			-0.395193	0.000297159	0.104499	0.189472	0.000171018	1	0	1	0
circ206	circATRNL1_6	chr10	115268444	115120185	+	ENSG00000107518	ATRNL1	down		down	hsa.miR.363.3p	up	-0.317642	0.00308697	ENSG00000164112	TMEM155	1		-0.317382	0.00321241	0.114334	0.16773	0.000171057	0	1	0	0
circ206	circATRNL1_6	chr10	115268444	115120185	+	ENSG00000107518	ATRNL1	down		down	hsa.miR.148a.3p	up	-0.332569	0.00202179	ENSG00000176204	LRRTM4			-0.256466	0.014255	0.185772	0.0577935	0.000171262	0	0	0	1
circ246	circATRNL1_11	chr10	115469329	115120185	+	ENSG00000107518	ATRNL1	down	down_turquoise	down	hsa.miR.148a.3p	up	-0.358576	0.000919439	ENSG00000146038	DCDC2			-0.236689	0.0218941	0.163799	0.0830701	0.000171845	0	0	1	0
circ246	circATRNL1_11	chr10	115469329	115120185	+	ENSG00000107518	ATRNL1	down	down_turquoise	down	hsa.miR.148a.3p	up	-0.358576	0.000919439	ENSG00000180998	GPR137C	1		-0.287766	0.00678027	0.0732142	0.269088	0.000172312	0	1	1	0
circ246	circATRNL1_11	chr10	115469329	115120185	+	ENSG00000107518	ATRNL1	down	down_turquoise	down	hsa.miR.148a.3p	up	-0.358576	0.000919439	ENSG00000112425	EPM2A			-0.232462	0.0239036	0.168997	0.0764596	0.00017257	0	0	1	0
circ27587	circDDX3Y	chrY	12913062	12909360	+	ENSG00000067048	DDX3Y	down		down	hsa.miR.148a.3p	up	-0.340794	0.00158703	ENSG00000058272	PPP1R12A			-0.206129	0.0400927	0.227363	0.0265273	0.00017323	0	0	1	0
circ246	circATRNL1_11	chr10	115469329	115120185	+	ENSG00000107518	ATRNL1	down	down_turquoise	down	hsa.miR.363.3p	up	-0.222003	0.0295342	ENSG00000110066	KMT5B			-0.372331	0.000634183	0.158446	0.0903066	0.000173544	1	0	1	0
circ217	circATRNL1_9	chr10	115315736	115120185	+	ENSG00000107518	ATRNL1	down	down_turquoise	down	hsa.miR.221.3p	up	-0.197542	0.0469456	ENSG00000130338	TULP4			-0.311613	0.00375084	0.273498	0.00960915	0.000173596	0	0	1	0
circ17709	circSLC4A7_1	chr3	27379249	27424152	-	ENSG00000033867	SLC4A7	down		down	hsa.miR.629.5p	up	-0.197751	0.0467681	ENSG00000116962	NID1			-0.288936	0.00671446	0.296798	0.0053891	0.000173619	0	0	1	0
circ246	circATRNL1_11	chr10	115469329	115120185	+	ENSG00000107518	ATRNL1	down	down_turquoise	down	hsa.miR.107	up	-0.399377	0.00023242	ENSG00000112130	RNF8			-0.200204	0.0447394	0.116563	0.163031	0.00017388	0	0	1	0
circ5511	circARID1A	chr1	26732792	26729651	+	ENSG00000117713	ARID1A	up		up	hsa.miR.204.3p	down	-0.37186	0.000599038	ENSG00000169760	NLGN1			-0.244385	0.018718	0.122344	0.151236	0.000173927	1	0	0	0
circ206	circATRNL1_6	chr10	115268444	115120185	+	ENSG00000107518	ATRNL1	down		down	hsa.miR.148a.3p	up	-0.332569	0.00202179	ENSG00000146038	DCDC2			-0.236689	0.0218941	0.208483	0.0383605	0.000174126	0	0	1	0
circ202	circATRNL1_5	chr10	115241725	115120185	+	ENSG00000107518	ATRNL1	down		down	hsa.miR.363.3p	up	-0.209506	0.0376264	ENSG00000034693	PEX3			-0.376589	0.000552814	0.16485	0.0817	0.000174246	0	0	1	0
circ202	circATRNL1_5	chr10	115241725	115120185	+	ENSG00000107518	ATRNL1	down		down	hsa.miR.363.3p	up	-0.209506	0.0376264	ENSG00000058272	PPP1R12A			-0.377206	0.000541843	0.163514	0.0834443	0.000174408	0	0	1	0
circ15905	circNRXN1_3	chr2	50472298	50620183	-	ENSG00000179915	NRXN1	down		down	hsa.miR.629.5p	up	-0.30334	0.0045432	ENSG00000066405	CLDN18			-0.29776	0.00538005	0.174679	0.0696925	0.000174605	0	0	0	1
circ206	circATRNL1_6	chr10	115268444	115120185	+	ENSG00000107518	ATRNL1	down		down	hsa.miR.148a.3p	up	-0.332569	0.00202179	ENSG00000085365	SCAMP1			-0.259952	0.0131745	0.179739	0.0640536	0.00017484	0	0	1	0
circ17709	circSLC4A7_1	chr3	27379249	27424152	-	ENSG00000033867	SLC4A7	down		down	hsa.P2.can246.m	up	-0.286893	0.00692985	ENSG00000171206	TRIM8			-0.341355	0.00163641	0.12269	0.150548	0.000174937	0	0	0	1
circ217	circATRNL1_9	chr10	115315736	115120185	+	ENSG00000107518	ATRNL1	down	down_turquoise	down	hsa.miR.708.5p	up	-0.296191	0.00547408	ENSG00000146535	GNA12		1	-0.3665	0.000763257	0.0274436	0.408862	0.000175029	0	0	1	0
circ217	circATRNL1_9	chr10	115315736	115120185	+	ENSG00000107518	ATRNL1	down	down_turquoise	down	hsa.miR.221.3p	up	-0.197542	0.0469456	ENSG00000185046	ANKS1B			-0.307849	0.00414361	0.277158	0.00880129	0.000175363	1	0	1	0
circ246	circATRNL1_11	chr10	115469329	115120185	+	ENSG00000107518	ATRNL1	down	down_turquoise	down	hsa.miR.148a.3p	up	-0.358576	0.000919439	ENSG00000143061	IGSF3			-0.273203	0.00967696	0.102972	0.192994	0.000175811	0	0	1	0
circ246	circATRNL1_11	chr10	115469329	115120185	+	ENSG00000107518	ATRNL1	down	down_turquoise	down	hsa.miR.130b.5p	up	-0.286115	0.00706556	ENSG00000139505	MTMR6			-0.349624	0.00128158	0.104329	0.189862	0.000175993	0	0	0	1
circ206	circATRNL1_6	chr10	115268444	115120185	+	ENSG00000107518	ATRNL1	down		down	hsa.miR.363.3p	up	-0.317642	0.00308697	ENSG00000006576	PHTF2			-0.315624	0.00336879	0.115425	0.165419	0.000176084	0	0	1	0
circ500	circSUV39H2	chr10	14897517	14896846	+	ENSG00000152457	DCLRE1C		down_turquoise	down	hsa.miR.450b.5p	up	-0.233641	0.0233285	ENSG00000001084	GCLC			-0.391491	0.000337151	0.0922187	0.218882	0.0001762	0	0	1	0
circ27587	circDDX3Y	chrY	12913062	12909360	+	ENSG00000067048	DDX3Y	down		down	hsa.miR.148a.3p	up	-0.340794	0.00158703	ENSG00000135932	CAB39			-0.199002	0.0457196	0.232813	0.0237311	0.000176229	0	0	1	0
circ19323	circGRK4	chr4	3029409	2984513	+	ENSG00000125388	GRK4	down		down	hsa.miR.450b.5p	up	-0.198287	0.046317	ENSG00000065809	FAM107B			-0.427095	9.44158e-05	0.0319942	0.394077	0.000176355	0	0	1	0
circ12207	circPPP4R1_1	chr18	9583117	9595102	-	ENSG00000154845	PPP4R1	up		up	hsa.miR.619.5p	down	-0.253819	0.0151241	ENSG00000145623	OSMR			-0.347433	0.00136813	0.163561	0.0833815	0.00017653	0	0	0	1
circ19323	circGRK4	chr4	3029409	2984513	+	ENSG00000125388	GRK4	down		down	hsa.miR.450b.5p	up	-0.198287	0.046317	ENSG00000135720	DYNC1LI2			-0.416636	0.000139131	0.0735015	0.268289	0.000176846	0	0	1	0
circ246	circATRNL1_11	chr10	115469329	115120185	+	ENSG00000107518	ATRNL1	down	down_turquoise	down	hsa.miR.107	up	-0.399377	0.00023242	ENSG00000164930	FZD6			-0.20551	0.0405881	0.107168	0.183411	0.000176961	0	0	1	0
circ206	circATRNL1_6	chr10	115268444	115120185	+	ENSG00000107518	ATRNL1	down		down	hsa.miR.148a.3p	up	-0.332569	0.00202179	ENSG00000171189	GRIK1			-0.292456	0.00602341	0.126944	0.142258	0.000177156	0	0	0	1
circ217	circATRNL1_9	chr10	115315736	115120185	+	ENSG00000107518	ATRNL1	down	down_turquoise	down	hsa.miR.130b.5p	up	-0.298159	0.00520265	ENSG00000177565	TBL1XR1			-0.302326	0.00478531	0.174744	0.0696177	0.000177227	1	0	1	0
circ206	circATRNL1_6	chr10	115268444	115120185	+	ENSG00000107518	ATRNL1	down		down	hsa.miR.363.3p	up	-0.317642	0.00308697	ENSG00000128641	MYO1B			-0.328891	0.00233838	0.0837671	0.240532	0.000177496	0	0	1	0
circ206	circATRNL1_6	chr10	115268444	115120185	+	ENSG00000107518	ATRNL1	down		down	hsa.miR.148a.3p	up	-0.332569	0.00202179	ENSG00000134265	NAPG	1		-0.271183	0.0101525	0.16225	0.0851181	0.000178452	0	1	1	0
circ206	circATRNL1_6	chr10	115268444	115120185	+	ENSG00000107518	ATRNL1	down		down	hsa.miR.363.3p	up	-0.317642	0.00308697	ENSG00000144224	UBXN4			-0.271011	0.0103317	0.188842	0.0547932	0.000178487	0	0	1	0
circ206	circATRNL1_6	chr10	115268444	115120185	+	ENSG00000107518	ATRNL1	down		down	hsa.miR.363.3p	up	-0.317642	0.00308697	ENSG00000205339	IPO7			-0.310225	0.00389172	0.125261	0.145501	0.000178526	0	0	1	0
circ27587	circDDX3Y	chrY	12913062	12909360	+	ENSG00000067048	DDX3Y	down		down	hsa.miR.148a.3p	up	-0.340794	0.00158703	ENSG00000146038	DCDC2			-0.236689	0.0218941	0.193634	0.050354	0.000178669	0	0	1	0
circ5511	circARID1A	chr1	26732792	26729651	+	ENSG00000117713	ARID1A	up		up	hsa.miR.204.3p	down	-0.37186	0.000599038	ENSG00000076706	MCAM			-0.234851	0.0228596	0.134747	0.127853	0.000178771	0	0	0	1
circ246	circATRNL1_11	chr10	115469329	115120185	+	ENSG00000107518	ATRNL1	down	down_turquoise	down	hsa.miR.130b.5p	up	-0.286115	0.00706556	ENSG00000161547	SRSF2			-0.332099	0.00213587	0.141615	0.116022	0.00017878	0	0	1	0
circ206	circATRNL1_6	chr10	115268444	115120185	+	ENSG00000107518	ATRNL1	down		down	hsa.miR.363.3p	up	-0.317642	0.00308697	ENSG00000101752	MIB1			-0.304085	0.00457211	0.136624	0.12454	0.000179383	1	0	1	0
circ217	circATRNL1_9	chr10	115315736	115120185	+	ENSG00000107518	ATRNL1	down	down_turquoise	down	hsa.miR.130b.5p	up	-0.298159	0.00520265	ENSG00000196531	NACA			-0.298531	0.00527527	0.179698	0.0640977	0.000179509	0	0	1	0
circ246	circATRNL1_11	chr10	115469329	115120185	+	ENSG00000107518	ATRNL1	down	down_turquoise	down	hsa.miR.148a.3p	up	-0.358576	0.000919439	ENSG00000115310	RTN4			-0.271321	0.0101192	0.104653	0.189119	0.000179541	0	0	1	0
circ246	circATRNL1_11	chr10	115469329	115120185	+	ENSG00000107518	ATRNL1	down	down_turquoise	down	hsa.chr9.24118.m	up	-0.302406	0.00465643	ENSG00000085511	MAP3K4			-0.296989	0.00548665	0.17523	0.0690609	0.000179965	0	0	0	1
circ27587	circDDX3Y	chrY	12913062	12909360	+	ENSG00000067048	DDX3Y	down		down	hsa.miR.148a.3p	up	-0.340794	0.00158703	ENSG00000182670	TTC3			-0.218547	0.0316155	0.212947	0.035239	0.000180292	0	0	1	0
circ17709	circSLC4A7_1	chr3	27379249	27424152	-	ENSG00000033867	SLC4A7	down		down	hsa.miR.629.5p	up	-0.197751	0.0467681	ENSG00000146360	GPR6			-0.369184	0.000701147	0.189601	0.0540709	0.000180725	0	0	0	1
circ20873	circPARP8	chr5	50763242	50750151	+	ENSG00000151883	PARP8	down		down	hsa.miR.363.3p	up	-0.202403	0.0429616	ENSG00000136152	COG3			-0.411113	0.000169938	0.0827228	0.243284	0.000180998	0	0	1	0
circ246	circATRNL1_11	chr10	115469329	115120185	+	ENSG00000107518	ATRNL1	down	down_turquoise	down	hsa.miR.148a.3p	up	-0.358576	0.000919439	ENSG00000106415	GLCCI1			-0.262096	0.0125449	0.120913	0.154103	0.000181112	0	0	1	0
circ8229	circMGA_1	chr15	41669958	41668828	+	ENSG00000174197	MGA		down_turquoise	down	hsa.miR.450b.5p	up	-0.221453	0.0298575	ENSG00000135720	DYNC1LI2			-0.416636	0.000139131	0.0216063	0.428012	0.00018116	0	0	1	0
circ206	circATRNL1_6	chr10	115268444	115120185	+	ENSG00000107518	ATRNL1	down		down	hsa.miR.363.3p	up	-0.317642	0.00308697	ENSG00000114021	NIT2			-0.330927	0.00220798	0.0759422	0.26155	0.000181572	0	0	1	0
circ206	circATRNL1_6	chr10	115268444	115120185	+	ENSG00000107518	ATRNL1	down		down	hsa.miR.363.3p	up	-0.317642	0.00308697	ENSG00000175265	GOLGA8A			-0.350056	0.0012651	0.0129532	0.456694	0.000181645	0	0	1	0
circ17405	circKLHL24_1	chr3	183651276	183643480	+	ENSG00000114796	KLHL24		down_turquoise	down	hsa.miR.107	up	-0.225838	0.0273561	ENSG00000116560	SFPQ			-0.383161	0.000445697	0.124703	0.146588	0.000181971	0	0	1	0
circ20464	circPPP2R2B	chr5	146691128	146701142	-	ENSG00000156475	PPP2R2B	up		up	hsa.miR.204.3p	down	-0.260596	0.0129827	ENSG00000143951	WDPCP			-0.370696	0.000668218	0.0972156	0.206617	0.000182426	0	0	0	1
circ246	circATRNL1_11	chr10	115469329	115120185	+	ENSG00000107518	ATRNL1	down	down_turquoise	down	hsa.miR.148a.3p	up	-0.358576	0.000919439	ENSG00000153558	FBXL2			-0.278155	0.00859146	0.0889801	0.227046	0.000182517	0	0	1	0
circ16286	circZNF638_2	chr2	71427414	71426460	+	ENSG00000075292	ZNF638	down		down	hsa.miR.766.3p	up	-0.311524	0.00365004	ENSG00000147065	MSN		1	-0.320221	0.00297353	0.115375	0.165526	0.000182782	1	0	1	0
circ27587	circDDX3Y	chrY	12913062	12909360	+	ENSG00000067048	DDX3Y	down		down	hsa.miR.148a.3p	up	-0.340794	0.00158703	ENSG00000156976	EIF4A2			-0.219211	0.031207	0.211255	0.0363972	0.000183315	0	0	1	0
circ246	circATRNL1_11	chr10	115469329	115120185	+	ENSG00000107518	ATRNL1	down	down_turquoise	down	hsa.miR.130b.5p	up	-0.286115	0.00706556	ENSG00000047410	TPR			-0.336727	0.00187131	0.130045	0.136409	0.000183398	0	0	1	0
circ20873	circPARP8	chr5	50763242	50750151	+	ENSG00000151883	PARP8	down		down	hsa.miR.363.3p	up	-0.202403	0.0429616	ENSG00000107036	RIC1			-0.422652	0.000111479	0.0370983	0.377671	0.000183854	0	0	1	0
circ217	circATRNL1_9	chr10	115315736	115120185	+	ENSG00000107518	ATRNL1	down	down_turquoise	down	hsa.miR.708.5p	up	-0.296191	0.00547408	ENSG00000091656	ZFHX4			-0.367765	0.000733392	0.0147583	0.450687	0.000183903	0	0	1	0
circ7234	circNEMF_1	chr14	49795791	49831361	-	ENSG00000165525	NEMF		down_turquoise	down	hsa.miR.450b.5p	up	-0.228948	0.0256873	ENSG00000076706	MCAM			-0.371005	0.000661672	0.14746	0.10657	0.000184076	0	0	1	0
circ19323	circGRK4	chr4	3029409	2984513	+	ENSG00000125388	GRK4	down		down	hsa.miR.450b.5p	up	-0.198287	0.046317	ENSG00000213672	NCKIPSD			-0.341232	0.00164232	0.232605	0.0238332	0.000184216	0	0	1	0
circ246	circATRNL1_11	chr10	115469329	115120185	+	ENSG00000107518	ATRNL1	down	down_turquoise	down	hsa.miR.148a.3p	up	-0.358576	0.000919439	ENSG00000174173	TRMT10C			-0.234822	0.0227636	0.161114	0.0866435	0.000184259	0	0	1	0
circ246	circATRNL1_11	chr10	115469329	115120185	+	ENSG00000107518	ATRNL1	down	down_turquoise	down	hsa.miR.148a.3p	up	-0.358576	0.000919439	ENSG00000109184	DCUN1D4	1		-0.26384	0.0120521	0.116115	0.163968	0.000184568	0	1	1	0
circ27587	circDDX3Y	chrY	12913062	12909360	+	ENSG00000067048	DDX3Y	down		down	hsa.miR.148a.3p	up	-0.340794	0.00158703	ENSG00000103657	HERC1			-0.221432	0.0298701	0.208522	0.0383323	0.000184583	0	0	1	0
circ8229	circMGA_1	chr15	41669958	41668828	+	ENSG00000174197	MGA		down_turquoise	down	hsa.miR.450b.5p	up	-0.221453	0.0298575	ENSG00000137656	BUD13			-0.353172	0.00115179	0.190907	0.0528448	0.000184598	0	0	1	0
circ206	circATRNL1_6	chr10	115268444	115120185	+	ENSG00000107518	ATRNL1	down		down	hsa.miR.148a.3p	up	-0.332569	0.00202179	ENSG00000164209	SLC25A46			-0.255154	0.0146803	0.182342	0.0612917	0.00018476	0	0	0	1
circ217	circATRNL1_9	chr10	115315736	115120185	+	ENSG00000107518	ATRNL1	down	down_turquoise	down	hsa.miR.130b.5p	up	-0.298159	0.00520265	ENSG00000078070	MCCC1			-0.326206	0.00252073	0.12871	0.138908	0.000184982	0	0	1	0
circ246	circATRNL1_11	chr10	115469329	115120185	+	ENSG00000107518	ATRNL1	down	down_turquoise	down	hsa.miR.107	up	-0.399377	0.00023242	ENSG00000196950	SLC39A10	1		-0.198044	0.0465224	0.113647	0.169196	0.00018566	0	1	1	0
circ27587	circDDX3Y	chrY	12913062	12909360	+	ENSG00000067048	DDX3Y	down		down	hsa.miR.148a.3p	up	-0.340794	0.00158703	ENSG00000152413	HOMER1			-0.26694	0.0112161	0.149818	0.102917	0.000185876	1	0	1	0
circ5511	circARID1A	chr1	26732792	26729651	+	ENSG00000117713	ARID1A	up		up	hsa.miR.204.3p	down	-0.37186	0.000599038	ENSG00000115839	RAB3GAP1			-0.222479	0.0293388	0.14896	0.104236	0.000185877	0	0	0	1
circ20464	circPPP2R2B	chr5	146691128	146701142	-	ENSG00000156475	PPP2R2B	up		up	hsa.miR.204.3p	down	-0.260596	0.0129827	ENSG00000117859	OSBPL9			-0.372239	0.000636067	0.0908964	0.222195	0.000186131	0	0	1	0
circ500	circSUV39H2	chr10	14897517	14896846	+	ENSG00000152457	DCLRE1C		down_turquoise	down	hsa.miR.450b.5p	up	-0.233641	0.0233285	ENSG00000143486	EIF2D			-0.34984	0.00127332	0.181879	0.0617767	0.000186147	0	0	1	0
circ206	circATRNL1_6	chr10	115268444	115120185	+	ENSG00000107518	ATRNL1	down		down	hsa.let.7g.3p	up	-0.414378	0.000133887	ENSG00000155229	MMS19			-0.216309	0.0330915	0.0256726	0.414651	0.000186328	0	0	0	1
circ246	circATRNL1_11	chr10	115469329	115120185	+	ENSG00000107518	ATRNL1	down	down_turquoise	down	hsa.miR.130b.5p	up	-0.286115	0.00706556	ENSG00000205133	TRIQK			-0.350241	0.0012581	0.0971716	0.206724	0.00018637	0	0	0	1
circ246	circATRNL1_11	chr10	115469329	115120185	+	ENSG00000107518	ATRNL1	down	down_turquoise	down	hsa.miR.107	up	-0.399377	0.00023242	ENSG00000127329	PTPRB			-0.22177	0.0297518	0.074402	0.265793	0.000186399	1	0	1	0
circ202	circATRNL1_5	chr10	115241725	115120185	+	ENSG00000107518	ATRNL1	down		down	hsa.miR.363.3p	up	-0.209506	0.0376264	ENSG00000147180	ZNF711			-0.416389	0.00014039	0.0459299	0.349802	0.000187258	0	0	1	0
circ206	circATRNL1_6	chr10	115268444	115120185	+	ENSG00000107518	ATRNL1	down		down	hsa.miR.148a.3p	up	-0.332569	0.00202179	ENSG00000118507	AKAP7			-0.229762	0.0252647	0.211538	0.0362016	0.000187378	0	0	1	0
circ206	circATRNL1_6	chr10	115268444	115120185	+	ENSG00000107518	ATRNL1	down		down	hsa.miR.363.3p	up	-0.317642	0.00308697	ENSG00000100697	DICER1			-0.274867	0.00943696	0.180254	0.0635005	0.000187439	0	0	1	0
circ5511	circARID1A	chr1	26732792	26729651	+	ENSG00000117713	ARID1A	up		up	hsa.miR.204.3p	down	-0.37186	0.000599038	ENSG00000016864	GLT8D1			-0.268357	0.0109887	0.0688264	0.281433	0.000187674	0	0	0	1
circ206	circATRNL1_6	chr10	115268444	115120185	+	ENSG00000107518	ATRNL1	down		down	hsa.miR.148a.3p	up	-0.332569	0.00202179	ENSG00000179456	ZBTB18			-0.317107	0.00313292	0.0647972	0.292999	0.000187963	0	0	1	0
circ246	circATRNL1_11	chr10	115469329	115120185	+	ENSG00000107518	ATRNL1	down	down_turquoise	down	hsa.miR.363.3p	up	-0.222003	0.0295342	ENSG00000138744	NAAA			-0.369894	0.000685512	0.157397	0.0917768	0.000188157	0	0	1	0
circ20873	circPARP8	chr5	50763242	50750151	+	ENSG00000151883	PARP8	down		down	hsa.miR.363.3p	up	-0.202403	0.0429616	ENSG00000147180	ZNF711			-0.416389	0.00014039	0.0595579	0.308353	0.000188304	0	0	1	0
circ217	circATRNL1_9	chr10	115315736	115120185	+	ENSG00000107518	ATRNL1	down	down_turquoise	down	hsa.chr5.14497.s	up	-0.251479	0.0159295	ENSG00000065413	ANKRD44			-0.37852	0.00047992	0.082498	0.243878	0.000188706	0	0	0	1
circ246	circATRNL1_11	chr10	115469329	115120185	+	ENSG00000107518	ATRNL1	down	down_turquoise	down	hsa.miR.107	up	-0.399377	0.00023242	ENSG00000169612	FAM103A1			-0.201469	0.0437206	0.107075	0.183619	0.000188831	0	0	1	0
circ206	circATRNL1_6	chr10	115268444	115120185	+	ENSG00000107518	ATRNL1	down		down	hsa.chr9.24118.m	up	-0.339495	0.0016496	ENSG00000196950	SLC39A10	1		-0.267987	0.0110831	0.150357	0.102094	0.000188892	0	1	0	0
circ15905	circNRXN1_3	chr2	50472298	50620183	-	ENSG00000179915	NRXN1	down		down	hsa.miR.708.5p	up	-0.216171	0.0331142	ENSG00000101888	NXT2			-0.407565	0.000192913	0.0650126	0.292375	0.000188995	0	0	1	0
circ206	circATRNL1_6	chr10	115268444	115120185	+	ENSG00000107518	ATRNL1	down		down	hsa.miR.148a.3p	up	-0.332569	0.00202179	ENSG00000132872	SYT4			-0.274607	0.00935793	0.152446	0.0989504	0.000189375	0	0	1	0
circ217	circATRNL1_9	chr10	115315736	115120185	+	ENSG00000107518	ATRNL1	down	down_turquoise	down	hsa.miR.221.3p	up	-0.197542	0.0469456	ENSG00000124164	VAPB			-0.295292	0.00572768	0.286695	0.00696424	0.000189418	0	0	1	0
circ206	circATRNL1_6	chr10	115268444	115120185	+	ENSG00000107518	ATRNL1	down		down	hsa.miR.363.3p	up	-0.317642	0.00308697	ENSG00000151239	TWF1			-0.266599	0.0114435	0.190448	0.0532733	0.000190228	0	0	1	0
circ3279	circFAT3	chr11	92355404	92352096	+	ENSG00000165323	FAT3	down	down_turquoise	down	hsa.miR.708.5p	up	-0.276348	0.00911154	ENSG00000149289	ZC3H12C			-0.383099	0.000446608	0.0109325	0.463429	0.000190568	0	0	1	0
circ246	circATRNL1_11	chr10	115469329	115120185	+	ENSG00000107518	ATRNL1	down	down_turquoise	down	hsa.miR.130b.5p	up	-0.286115	0.00706556	ENSG00000081014	AP4E1			-0.36576	0.000781245	0.0484701	0.341923	0.000190703	0	0	1	0
circ202	circATRNL1_5	chr10	115241725	115120185	+	ENSG00000107518	ATRNL1	down		down	hsa.miR.363.3p	up	-0.209506	0.0376264	ENSG00000110066	KMT5B			-0.372331	0.000634183	0.166871	0.0791146	0.000190742	1	0	1	0
circ27587	circDDX3Y	chrY	12913062	12909360	+	ENSG00000067048	DDX3Y	down		down	hsa.miR.148a.3p	up	-0.340794	0.00158703	ENSG00000141384	TAF4B			-0.246716	0.0176802	0.176778	0.0673095	0.000190812	0	0	1	0
circ246	circATRNL1_11	chr10	115469329	115120185	+	ENSG00000107518	ATRNL1	down	down_turquoise	down	hsa.miR.130b.5p	up	-0.286115	0.00706556	ENSG00000163728	TTC14			-0.363538	0.000837535	0.0558131	0.319534	0.000191007	0	0	0	1
circ246	circATRNL1_11	chr10	115469329	115120185	+	ENSG00000107518	ATRNL1	down	down_turquoise	down	hsa.miR.107	up	-0.399377	0.00023242	ENSG00000160131	VMA21			-0.20116	0.0439674	0.106366	0.18522	0.000191168	0	0	1	0
circ5511	circARID1A	chr1	26732792	26729651	+	ENSG00000117713	ARID1A	up		up	hsa.miR.204.3p	down	-0.37186	0.000599038	ENSG00000134333	LDHA			-0.241392	0.0199445	0.118787	0.158426	0.000191173	0	0	0	1
circ246	circATRNL1_11	chr10	115469329	115120185	+	ENSG00000107518	ATRNL1	down	down_turquoise	down	hsa.miR.107	up	-0.399377	0.00023242	ENSG00000196776	CD47			-0.200605	0.0444144	0.106967	0.183862	0.000191622	0	0	1	0
circ3279	circFAT3	chr11	92355404	92352096	+	ENSG00000165323	FAT3	down	down_turquoise	down	hsa.miR.708.5p	up	-0.276348	0.00911154	ENSG00000163629	PTPN13		1	-0.377083	0.000544021	0.0352635	0.383545	0.000191901	0	0	1	0
circ246	circATRNL1_11	chr10	115469329	115120185	+	ENSG00000107518	ATRNL1	down	down_turquoise	down	hsa.miR.107	up	-0.399377	0.00023242	ENSG00000117152	RGS4	1		-0.20008	0.0448398	0.10726	0.183203	0.000192603	0	1	1	0
circ206	circATRNL1_6	chr10	115268444	115120185	+	ENSG00000107518	ATRNL1	down		down	hsa.miR.148a.3p	up	-0.332569	0.00202179	ENSG00000152193	RNF219			-0.200282	0.0446654	0.238348	0.0211444	0.000192615	0	0	1	0
circ5511	circARID1A	chr1	26732792	26729651	+	ENSG00000117713	ARID1A	up		up	hsa.miR.204.3p	down	-0.37186	0.000599038	ENSG00000163875	MEAF6			-0.201746	0.0434994	0.17159	0.0733135	0.000192699	0	0	0	1
circ27587	circDDX3Y	chrY	12913062	12909360	+	ENSG00000067048	DDX3Y	down		down	hsa.miR.148a.3p	up	-0.340794	0.00158703	ENSG00000170852	KBTBD2			-0.19405	0.0499823	0.232081	0.0240919	0.000192757	0	0	1	0
circ27587	circDDX3Y	chrY	12913062	12909360	+	ENSG00000067048	DDX3Y	down		down	hsa.miR.148a.3p	up	-0.340794	0.00158703	ENSG00000177189	RPS6KA3			-0.223761	0.0285185	0.203315	0.0422447	0.000192837	1	0	1	0
circ217	circATRNL1_9	chr10	115315736	115120185	+	ENSG00000107518	ATRNL1	down	down_turquoise	down	hsa.miR.130b.5p	up	-0.298159	0.00520265	ENSG00000117533	VAMP4			-0.31041	0.00387267	0.1552	0.0949116	0.000192864	0	0	0	1
circ5511	circARID1A	chr1	26732792	26729651	+	ENSG00000117713	ARID1A	up		up	hsa.miR.204.3p	down	-0.37186	0.000599038	ENSG00000108582	CPD			-0.223251	0.0288952	0.14491	0.110625	0.000193084	0	0	0	1
circ217	circATRNL1_9	chr10	115315736	115120185	+	ENSG00000107518	ATRNL1	down	down_turquoise	down	hsa.chr5.14497.s	up	-0.251479	0.0159295	ENSG00000138604	GLCE			-0.377672	0.000493796	0.0825952	0.243621	0.000193212	0	0	0	1
circ206	circATRNL1_6	chr10	115268444	115120185	+	ENSG00000107518	ATRNL1	down		down	hsa.miR.363.3p	up	-0.317642	0.00308697	ENSG00000196628	TCF4			-0.276317	0.00911822	0.176029	0.068152	0.000193387	1	0	1	0
circ206	circATRNL1_6	chr10	115268444	115120185	+	ENSG00000107518	ATRNL1	down		down	hsa.miR.148a.3p	up	-0.332569	0.00202179	ENSG00000143061	IGSF3			-0.273203	0.00967696	0.152976	0.0981639	0.00019358	0	0	1	0
circ217	circATRNL1_9	chr10	115315736	115120185	+	ENSG00000107518	ATRNL1	down	down_turquoise	down	hsa.miR.130b.5p	up	-0.298159	0.00520265	ENSG00000112031	MTRF1L			-0.333241	0.00206769	0.10928	0.1787	0.000193736	0	0	0	1
circ219	circATRNL1_10	chr10	115315736	115215697	+	ENSG00000107518	ATRNL1		down_turquoise	down	hsa.miR.708.5p	up	-0.199181	0.0455711	ENSG00000004799	PDK4			-0.347711	0.00135687	0.219174	0.0312297	0.00019449	0	0	1	0
circ246	circATRNL1_11	chr10	115469329	115120185	+	ENSG00000107518	ATRNL1	down	down_turquoise	down	hsa.miR.148a.3p	up	-0.358576	0.000919439	ENSG00000047621	C12orf4			-0.23783	0.021376	0.152908	0.0982646	0.00019451	0	0	1	0
circ5511	circARID1A	chr1	26732792	26729651	+	ENSG00000117713	ARID1A	up		up	hsa.miR.204.3p	down	-0.37186	0.000599038	ENSG00000157219	HTR5A			-0.244447	0.0186934	0.111926	0.172902	0.000194931	0	0	0	1
circ217	circATRNL1_9	chr10	115315736	115120185	+	ENSG00000107518	ATRNL1	down	down_turquoise	down	hsa.miR.130b.5p	up	-0.298159	0.00520265	ENSG00000170522	ELOVL6			-0.262742	0.0124976	0.221587	0.0297786	0.000194937	0	0	1	0
circ206	circATRNL1_6	chr10	115268444	115120185	+	ENSG00000107518	ATRNL1	down		down	hsa.miR.363.3p	up	-0.317642	0.00308697	ENSG00000065150	IPO5			-0.300383	0.00503104	0.136546	0.124677	0.000194944	0	0	1	0
circ246	circATRNL1_11	chr10	115469329	115120185	+	ENSG00000107518	ATRNL1	down	down_turquoise	down	hsa.miR.148a.3p	up	-0.358576	0.000919439	ENSG00000115073	ACTR1B	1		-0.257638	0.0138836	0.12207	0.151783	0.000195049	0	1	1	0
circ27587	circDDX3Y	chrY	12913062	12909360	+	ENSG00000067048	DDX3Y	down		down	hsa.miR.148a.3p	up	-0.340794	0.00158703	ENSG00000198668	CALM1			-0.234853	0.022749	0.18999	0.0537038	0.000195167	0	0	1	0
circ217	circATRNL1_9	chr10	115315736	115120185	+	ENSG00000107518	ATRNL1	down	down_turquoise	down	hsa.miR.130b.5p	up	-0.298159	0.00520265	ENSG00000110435	PDHX			-0.325836	0.00254685	0.124451	0.147079	0.000196028	0	0	1	0
circ8229	circMGA_1	chr15	41669958	41668828	+	ENSG00000174197	MGA		down_turquoise	down	hsa.miR.450b.5p	up	-0.221453	0.0298575	ENSG00000090686	USP48			-0.359466	0.000950338	0.175443	0.0688176	0.000196359	0	0	1	0
circ246	circATRNL1_11	chr10	115469329	115120185	+	ENSG00000107518	ATRNL1	down	down_turquoise	down	hsa.miR.107	up	-0.399377	0.00023242	ENSG00000070367	EXOC5			-0.195946	0.0483076	0.111379	0.17409	0.000196528	1	0	1	0
circ206	circATRNL1_6	chr10	115268444	115120185	+	ENSG00000107518	ATRNL1	down		down	hsa.miR.363.3p	up	-0.317642	0.00308697	ENSG00000234545	FAM133B			-0.289831	0.00656718	0.15416	0.096422	0.000196537	0	0	1	0
circ246	circATRNL1_11	chr10	115469329	115120185	+	ENSG00000107518	ATRNL1	down	down_turquoise	down	hsa.miR.363.3p	up	-0.222003	0.0295342	ENSG00000082269	FAM135A			-0.369462	0.000694991	0.154635	0.0957298	0.000197419	0	0	1	0
circ206	circATRNL1_6	chr10	115268444	115120185	+	ENSG00000107518	ATRNL1	down		down	hsa.miR.363.3p	up	-0.317642	0.00308697	ENSG00000114331	ACAP2			-0.271319	0.0102575	0.181563	0.0621089	0.000197567	0	0	1	0
circ17405	circKLHL24_1	chr3	183651276	183643480	+	ENSG00000114796	KLHL24		down_turquoise	down	hsa.miR.107	up	-0.225838	0.0273561	ENSG00000197763	TXNRD3			-0.375663	0.000569649	0.13555	0.126428	0.00019787	0	0	1	0
circ206	circATRNL1_6	chr10	115268444	115120185	+	ENSG00000107518	ATRNL1	down		down	hsa.chr9.24118.m	up	-0.339495	0.0016496	ENSG00000111880	RNGTT			-0.2529	0.0155687	0.168781	0.0767264	0.000197898	0	0	0	1
circ206	circATRNL1_6	chr10	115268444	115120185	+	ENSG00000107518	ATRNL1	down		down	hsa.miR.363.3p	up	-0.317642	0.00308697	ENSG00000115762	PLEKHB2			-0.298315	0.00530443	0.13904	0.120365	0.000197935	0	0	1	0
circ5511	circARID1A	chr1	26732792	26729651	+	ENSG00000117713	ARID1A	up		up	hsa.miR.204.3p	down	-0.37186	0.000599038	ENSG00000183475	ASB7			-0.223035	0.0290188	0.143211	0.113385	0.000197943	0	0	0	1
circ246	circATRNL1_11	chr10	115469329	115120185	+	ENSG00000107518	ATRNL1	down	down_turquoise	down	hsa.miR.148a.3p	up	-0.358576	0.000919439	ENSG00000164209	SLC25A46			-0.255154	0.0146803	0.124893	0.146217	0.000198164	0	0	0	1
circ246	circATRNL1_11	chr10	115469329	115120185	+	ENSG00000107518	ATRNL1	down	down_turquoise	down	hsa.miR.363.3p	up	-0.222003	0.0295342	ENSG00000113580	NR3C1			-0.373843	0.000604124	0.144886	0.110664	0.000198244	0	0	1	0
circ206	circATRNL1_6	chr10	115268444	115120185	+	ENSG00000107518	ATRNL1	down		down	hsa.miR.148a.3p	up	-0.332569	0.00202179	ENSG00000097046	CDC7			-0.244186	0.0186737	0.191243	0.0525329	0.000199005	0	0	1	0
circ20873	circPARP8	chr5	50763242	50750151	+	ENSG00000151883	PARP8	down		down	hsa.miR.363.3p	up	-0.202403	0.0429616	ENSG00000163053	SLC16A14			-0.426694	9.5851e-05	0.00531319	0.482208	0.000199209	0	0	1	0
circ206	circATRNL1_6	chr10	115268444	115120185	+	ENSG00000107518	ATRNL1	down		down	hsa.miR.148a.3p	up	-0.332569	0.00202179	ENSG00000118276	B4GALT6			-0.257947	0.0137872	0.173208	0.0713991	0.0001996	0	0	1	0
circ217	circATRNL1_9	chr10	115315736	115120185	+	ENSG00000107518	ATRNL1	down	down_turquoise	down	hsa.miR.424.5p	up	-0.262979	0.0122932	ENSG00000120738	EGR1			-0.389794	0.000357075	0.0133041	0.455525	0.000200405	0	0	1	0
circ206	circATRNL1_6	chr10	115268444	115120185	+	ENSG00000107518	ATRNL1	down		down	hsa.miR.363.3p	up	-0.317642	0.00308697	ENSG00000198954	KIF1BP	1		-0.293903	0.00593171	0.145759	0.109264	0.000200505	0	1	1	0
circ15905	circNRXN1_3	chr2	50472298	50620183	-	ENSG00000179915	NRXN1	down		down	hsa.miR.708.5p	up	-0.216171	0.0331142	ENSG00000148411	NACC2			-0.320992	0.0029114	0.239226	0.0207563	0.000200535	0	0	1	0
circ17709	circSLC4A7_1	chr3	27379249	27424152	-	ENSG00000033867	SLC4A7	down		down	hsa.miR.708.5p	up	-0.197115	0.0473089	ENSG00000004799	PDK4			-0.347711	0.00135687	0.21916	0.0312382	0.000200893	0	0	1	0
circ27587	circDDX3Y	chrY	12913062	12909360	+	ENSG00000067048	DDX3Y	down		down	hsa.miR.148a.3p	up	-0.340794	0.00158703	ENSG00000170871	KIAA0232			-0.207641	0.038973	0.217242	0.0324316	0.000200952	0	0	1	0
circ5511	circARID1A	chr1	26732792	26729651	+	ENSG00000117713	ARID1A	up		up	hsa.miR.204.3p	down	-0.37186	0.000599038	ENSG00000110880	CORO1C			-0.256541	0.0143657	0.0861998	0.234186	0.000201758	0	0	0	1
circ246	circATRNL1_11	chr10	115469329	115120185	+	ENSG00000107518	ATRNL1	down	down_turquoise	down	hsa.miR.148a.3p	up	-0.358576	0.000919439	ENSG00000118276	B4GALT6			-0.257947	0.0137872	0.118414	0.159193	0.00020199	0	0	1	0
circ206	circATRNL1_6	chr10	115268444	115120185	+	ENSG00000107518	ATRNL1	down		down	hsa.miR.148a.3p	up	-0.332569	0.00202179	ENSG00000115310	RTN4			-0.271321	0.0101192	0.152586	0.0987418	0.000202175	0	0	1	0
circ206	circATRNL1_6	chr10	115268444	115120185	+	ENSG00000107518	ATRNL1	down		down	hsa.miR.363.3p	up	-0.317642	0.00308697	ENSG00000178074	C2orf69			-0.293441	0.00600111	0.145681	0.109389	0.000202717	0	0	1	0
circ219	circATRNL1_10	chr10	115315736	115215697	+	ENSG00000107518	ATRNL1		down_turquoise	down	hsa.miR.708.5p	up	-0.199181	0.0455711	ENSG00000146535	GNA12		1	-0.3665	0.000763257	0.185113	0.0584532	0.000203291	0	0	1	0
circ206	circATRNL1_6	chr10	115268444	115120185	+	ENSG00000107518	ATRNL1	down		down	hsa.miR.363.3p	up	-0.317642	0.00308697	ENSG00000132823	OSER1			-0.298285	0.0053086	0.136889	0.124078	0.000203307	0	0	1	0
circ246	circATRNL1_11	chr10	115469329	115120185	+	ENSG00000107518	ATRNL1	down	down_turquoise	down	hsa.miR.363.3p	up	-0.222003	0.0295342	ENSG00000152749	GPR180			-0.384765	0.000422597	0.116609	0.162935	0.00020333	0	0	1	0
circ206	circATRNL1_6	chr10	115268444	115120185	+	ENSG00000107518	ATRNL1	down		down	hsa.miR.363.3p	up	-0.317642	0.00308697	ENSG00000132463	GRSF1			-0.30717	0.00421817	0.119821	0.156314	0.000203486	0	0	1	0
circ27587	circDDX3Y	chrY	12913062	12909360	+	ENSG00000067048	DDX3Y	down		down	hsa.miR.148a.3p	up	-0.340794	0.00158703	ENSG00000197045	GMFB			-0.214629	0.0341174	0.209416	0.03769	0.000203943	0	0	1	0
circ246	circATRNL1_11	chr10	115469329	115120185	+	ENSG00000107518	ATRNL1	down	down_turquoise	down	hsa.miR.107	up	-0.399377	0.00023242	ENSG00000122042	UBL3			-0.216988	0.0326606	0.0732759	0.268917	0.000203995	0	0	1	0
circ217	circATRNL1_9	chr10	115315736	115120185	+	ENSG00000107518	ATRNL1	down	down_turquoise	down	hsa.miR.130b.5p	up	-0.298159	0.00520265	ENSG00000058272	PPP1R12A			-0.266907	0.0113626	0.213993	0.0345381	0.000204029	0	0	1	0
circ217	circATRNL1_9	chr10	115315736	115120185	+	ENSG00000107518	ATRNL1	down	down_turquoise	down	hsa.miR.130b.5p	up	-0.298159	0.00520265	ENSG00000169139	UBE2V2			-0.288535	0.00678141	0.185689	0.0578755	0.000204045	0	0	0	1
circ206	circATRNL1_6	chr10	115268444	115120185	+	ENSG00000107518	ATRNL1	down		down	hsa.let.7g.3p	up	-0.414378	0.000133887	ENSG00000159082	SYNJ1			-0.209922	0.037376	0.0269975	0.410318	0.000205021	1	0	1	0
circ246	circATRNL1_11	chr10	115469329	115120185	+	ENSG00000107518	ATRNL1	down	down_turquoise	down	hsa.miR.130b.5p	up	-0.286115	0.00706556	ENSG00000149231	CCDC82			-0.320221	0.00297353	0.153247	0.0977629	0.000205078	0	0	0	1
circ5511	circARID1A	chr1	26732792	26729651	+	ENSG00000117713	ARID1A	up		up	hsa.miR.204.3p	down	-0.37186	0.000599038	ENSG00000110442	COMMD9			-0.230408	0.0250344	0.129506	0.137414	0.000205659	0	0	0	1
circ27587	circDDX3Y	chrY	12913062	12909360	+	ENSG00000067048	DDX3Y	down		down	hsa.miR.148a.3p	up	-0.340794	0.00158703	ENSG00000111860	CEP85L			-0.248937	0.0168447	0.16848	0.0770993	0.00020569	0	0	0	1
circ206	circATRNL1_6	chr10	115268444	115120185	+	ENSG00000107518	ATRNL1	down		down	hsa.miR.148a.3p	up	-0.332569	0.00202179	ENSG00000107105	ELAVL2			-0.265151	0.0116923	0.160676	0.087238	0.000205788	1	0	1	0
circ206	circATRNL1_6	chr10	115268444	115120185	+	ENSG00000107518	ATRNL1	down		down	hsa.miR.363.3p	up	-0.317642	0.00308697	ENSG00000110315	RNF141			-0.259009	0.0135956	0.194999	0.0491419	0.000205805	0	0	1	0
circ206	circATRNL1_6	chr10	115268444	115120185	+	ENSG00000107518	ATRNL1	down		down	hsa.miR.148a.3p	up	-0.332569	0.00202179	ENSG00000103769	RAB11A			-0.264349	0.0119113	0.16158	0.0860159	0.000206576	0	0	1	0
circ206	circATRNL1_6	chr10	115268444	115120185	+	ENSG00000107518	ATRNL1	down		down	hsa.miR.148a.3p	up	-0.332569	0.00202179	ENSG00000067064	IDI1			-0.278541	0.00851149	0.139009	0.120418	0.000206641	0	0	1	0
circ500	circSUV39H2	chr10	14897517	14896846	+	ENSG00000152457	DCLRE1C		down_turquoise	down	hsa.miR.450b.5p	up	-0.233641	0.0233285	ENSG00000120800	UTP20			-0.378965	0.000511652	0.111584	0.173646	0.000206679	0	0	1	0
circ246	circATRNL1_11	chr10	115469329	115120185	+	ENSG00000107518	ATRNL1	down	down_turquoise	down	hsa.chr9.24118.m	up	-0.302406	0.00465643	ENSG00000109586	GALNT7			-0.318401	0.00312484	0.12676	0.142612	0.000206888	0	0	0	1
circ246	circATRNL1_11	chr10	115469329	115120185	+	ENSG00000107518	ATRNL1	down	down_turquoise	down	hsa.miR.218.2.3p	up	-0.22407	0.0283433	ENSG00000172348	RCAN2	1		-0.348945	0.00130785	0.187555	0.0560356	0.000207067	0	1	0	0
circ5511	circARID1A	chr1	26732792	26729651	+	ENSG00000117713	ARID1A	up		up	hsa.miR.204.3p	down	-0.37186	0.000599038	ENSG00000221886	ZBED8			-0.282951	0.00777559	0.0161347	0.446115	0.000207132	0	0	0	1
circ246	circATRNL1_11	chr10	115469329	115120185	+	ENSG00000107518	ATRNL1	down	down_turquoise	down	hsa.miR.130b.5p	up	-0.286115	0.00706556	ENSG00000075651	PLD1			-0.370819	0.000665592	0.0171851	0.442629	0.000207444	0	0	0	1
circ246	circATRNL1_11	chr10	115469329	115120185	+	ENSG00000107518	ATRNL1	down	down_turquoise	down	hsa.miR.130b.5p	up	-0.286115	0.00706556	ENSG00000108946	PRKAR1A	1		-0.327379	0.00243958	0.138792	0.120789	0.000207483	0	1	1	0
circ27587	circDDX3Y	chrY	12913062	12909360	+	ENSG00000067048	DDX3Y	down		down	hsa.miR.148a.3p	up	-0.340794	0.00158703	ENSG00000253719	ATXN7L3B			-0.209785	0.0374279	0.213224	0.0350526	0.000207487	0	0	1	0
circ246	circATRNL1_11	chr10	115469329	115120185	+	ENSG00000107518	ATRNL1	down	down_turquoise	down	hsa.miR.130b.5p	up	-0.286115	0.00706556	ENSG00000124356	STAMBP			-0.350858	0.00123501	0.0843521	0.238997	0.000207779	0	0	1	0
circ206	circATRNL1_6	chr10	115268444	115120185	+	ENSG00000107518	ATRNL1	down		down	hsa.miR.148a.3p	up	-0.332569	0.00202179	ENSG00000149212	SESN3			-0.217545	0.0322411	0.217742	0.0321174	0.000208469	0	0	1	0
circ246	circATRNL1_11	chr10	115469329	115120185	+	ENSG00000107518	ATRNL1	down	down_turquoise	down	hsa.miR.148a.3p	up	-0.358576	0.000919439	ENSG00000009335	UBE3C			-0.245112	0.0183049	0.136571	0.124634	0.000208816	1	0	1	0
circ217	circATRNL1_9	chr10	115315736	115120185	+	ENSG00000107518	ATRNL1	down	down_turquoise	down	hsa.miR.130b.5p	up	-0.298159	0.00520265	ENSG00000131931	THAP1			-0.269838	0.0106177	0.208973	0.0380068	0.000208977	0	0	0	1
circ219	circATRNL1_10	chr10	115315736	115215697	+	ENSG00000107518	ATRNL1		down_turquoise	down	hsa.miR.708.5p	up	-0.199181	0.0455711	ENSG00000204580	DDR1			-0.32633	0.00251207	0.244975	0.018359	0.000209164	0	0	1	0
circ246	circATRNL1_11	chr10	115469329	115120185	+	ENSG00000107518	ATRNL1	down	down_turquoise	down	hsa.miR.148a.3p	up	-0.358576	0.000919439	ENSG00000160752	FDPS			-0.251344	0.0159771	0.12642	0.143263	0.000209406	0	0	1	0
circ246	circATRNL1_11	chr10	115469329	115120185	+	ENSG00000107518	ATRNL1	down	down_turquoise	down	hsa.miR.107	up	-0.399377	0.00023242	ENSG00000050426	LETMD1			-0.201191	0.0439426	0.0974338	0.206091	0.000209432	0	0	1	0
circ246	circATRNL1_11	chr10	115469329	115120185	+	ENSG00000107518	ATRNL1	down	down_turquoise	down	hsa.miR.107	up	-0.399377	0.00023242	ENSG00000076554	TPD52			-0.20116	0.0439674	0.0974492	0.206054	0.000209501	0	0	1	0
circ206	circATRNL1_6	chr10	115268444	115120185	+	ENSG00000107518	ATRNL1	down		down	hsa.miR.148a.3p	up	-0.332569	0.00202179	ENSG00000162374	ELAVL4			-0.279976	0.00821959	0.135019	0.127369	0.000210441	0	0	0	1
circ206	circATRNL1_6	chr10	115268444	115120185	+	ENSG00000107518	ATRNL1	down		down	hsa.miR.363.3p	up	-0.317642	0.00308697	ENSG00000130703	OSBPL2			-0.30353	0.00463852	0.124014	0.147935	0.00021058	0	0	1	0
circ217	circATRNL1_9	chr10	115315736	115120185	+	ENSG00000107518	ATRNL1	down	down_turquoise	down	hsa.miR.130b.5p	up	-0.298159	0.00520265	ENSG00000087448	KLHL42			-0.310379	0.00387584	0.148416	0.105079	0.000210632	0	0	1	0
circ246	circATRNL1_11	chr10	115469329	115120185	+	ENSG00000107518	ATRNL1	down	down_turquoise	down	hsa.miR.148a.3p	up	-0.358576	0.000919439	ENSG00000186952	TMEM232			-0.227572	0.0264153	0.160636	0.0872918	0.000210733	0	0	1	0
circ17709	circSLC4A7_1	chr3	27379249	27424152	-	ENSG00000033867	SLC4A7	down		down	hsa.miR.708.5p	up	-0.197115	0.0473089	ENSG00000146535	GNA12		1	-0.3665	0.000763257	0.184835	0.0587333	0.000210794	0	0	1	0
circ7886	circVRK1	chr14	96860735	96833467	+	ENSG00000100749	VRK1		down_turquoise	down	hsa.miR.450b.5p	up	-0.273195	0.00967881	ENSG00000143643	TTC13			-0.266784	0.0113949	0.242736	0.0192637	0.000211117	0	0	1	0
circ7234	circNEMF_1	chr14	49795791	49831361	-	ENSG00000165525	NEMF		down_turquoise	down	hsa.miR.450b.5p	up	-0.228948	0.0256873	ENSG00000182359	KBTBD3			-0.376589	0.000552814	0.123092	0.149751	0.000211282	0	0	1	0
circ20873	circPARP8	chr5	50763242	50750151	+	ENSG00000151883	PARP8	down		down	hsa.miR.363.3p	up	-0.202403	0.0429616	ENSG00000066739	ATG2B	1		-0.411792	0.00016584	0.0625671	0.299492	0.000211904	0	1	1	0
circ246	circATRNL1_11	chr10	115469329	115120185	+	ENSG00000107518	ATRNL1	down	down_turquoise	down	hsa.miR.363.3p	up	-0.222003	0.0295342	ENSG00000128607	KLHDC10			-0.398402	0.00026606	0.072196	0.271929	0.000212158	0	0	1	0
circ217	circATRNL1_9	chr10	115315736	115120185	+	ENSG00000107518	ATRNL1	down	down_turquoise	down	hsa.miR.130b.5p	up	-0.298159	0.00520265	ENSG00000070087	PFN2			-0.293564	0.00598254	0.175569	0.0686737	0.000212217	0	0	1	0
circ206	circATRNL1_6	chr10	115268444	115120185	+	ENSG00000107518	ATRNL1	down		down	hsa.miR.148a.3p	up	-0.332569	0.00202179	ENSG00000172020	GAP43			-0.253056	0.0153829	0.175297	0.0689842	0.000212898	1	0	0	0
circ246	circATRNL1_11	chr10	115469329	115120185	+	ENSG00000107518	ATRNL1	down	down_turquoise	down	hsa.miR.107	up	-0.399377	0.00023242	ENSG00000154114	TBCEL			-0.2272	0.026709	0.047236	0.345743	0.000212966	0	0	1	0
circ19323	circGRK4	chr4	3029409	2984513	+	ENSG00000125388	GRK4	down		down	hsa.miR.450b.5p	up	-0.198287	0.046317	ENSG00000120800	UTP20			-0.378965	0.000511652	0.158112	0.0907724	0.000213381	0	0	1	0
circ202	circATRNL1_5	chr10	115241725	115120185	+	ENSG00000107518	ATRNL1	down		down	hsa.miR.363.3p	up	-0.209506	0.0376264	ENSG00000077254	USP33	1		-0.390565	0.000347889	0.115734	0.164769	0.000213862	0	1	1	0
circ246	circATRNL1_11	chr10	115469329	115120185	+	ENSG00000107518	ATRNL1	down	down_turquoise	down	hsa.miR.148a.3p	up	-0.358576	0.000919439	ENSG00000179387	ELMOD2			-0.210896	0.036647	0.179688	0.064109	0.000214146	0	0	1	0
circ19215	circPACRGL	chr4	20713539	20704466	+	ENSG00000163138	PACRGL		down_turquoise	down	hsa.miR.491.5p	up_DE module_yellow	-0.226898	0.0267775	ENSG00000055208	TAB2			-0.392386	0.00032706	0.0812162	0.247283	0.000214618	0	0	1	0
circ206	circATRNL1_6	chr10	115268444	115120185	+	ENSG00000107518	ATRNL1	down		down	hsa.miR.363.3p	up	-0.317642	0.00308697	ENSG00000185008	ROBO2			-0.28508	0.00738264	0.155064	0.0951077	0.000214774	1	0	1	0
circ202	circATRNL1_5	chr10	115241725	115120185	+	ENSG00000107518	ATRNL1	down		down	hsa.miR.363.3p	up	-0.209506	0.0376264	ENSG00000213096	ZNF254			-0.362551	0.00086371	0.1773	0.0667263	0.000214857	0	0	1	0
circ27587	circDDX3Y	chrY	12913062	12909360	+	ENSG00000067048	DDX3Y	down		down	hsa.chr5.14497.s	up	-0.242594	0.0193225	ENSG00000042429	MED17			-0.301341	0.0047884	0.233383	0.0234535	0.000214986	0	0	0	1
circ17709	circSLC4A7_1	chr3	27379249	27424152	-	ENSG00000033867	SLC4A7	down		down	hsa.miR.708.5p	up	-0.197115	0.0473089	ENSG00000204580	DDR1			-0.32633	0.00251207	0.245194	0.0182723	0.000215117	0	0	1	0
circ27587	circDDX3Y	chrY	12913062	12909360	+	ENSG00000067048	DDX3Y	down		down	hsa.chr5.14497.s	up	-0.242594	0.0193225	ENSG00000183023	SLC8A1	1		-0.318403	0.00302256	0.210083	0.0372167	0.000215291	0	1	0	0
circ206	circATRNL1_6	chr10	115268444	115120185	+	ENSG00000107518	ATRNL1	down		down	hsa.miR.363.3p	up	-0.317642	0.00308697	ENSG00000143952	VPS54			-0.273726	0.00969458	0.17207	0.0727411	0.000215574	0	0	1	0
circ206	circATRNL1_6	chr10	115268444	115120185	+	ENSG00000107518	ATRNL1	down		down	hsa.let.7g.3p	up	-0.414378	0.000133887	ENSG00000174738	NR1D2			-0.213902	0.0346567	0.00916544	0.469328	0.000215642	0	0	0	1
circ246	circATRNL1_11	chr10	115469329	115120185	+	ENSG00000107518	ATRNL1	down	down_turquoise	down	hsa.miR.363.3p	up	-0.222003	0.0295342	ENSG00000143669	LYST			-0.391583	0.000336094	0.0919265	0.219612	0.00021583	0	0	1	0
circ7886	circVRK1	chr14	96860735	96833467	+	ENSG00000100749	VRK1		down_turquoise	down	hsa.miR.450b.5p	up	-0.273195	0.00967881	ENSG00000103994	ZNF106			-0.327224	0.00245012	0.157273	0.0919509	0.000215882	0	0	1	0
circ246	circATRNL1_11	chr10	115469329	115120185	+	ENSG00000107518	ATRNL1	down	down_turquoise	down	hsa.miR.148a.3p	up	-0.358576	0.000919439	ENSG00000112541	PDE10A	1		-0.28846	0.00666329	0.043765	0.356567	0.000216219	0	1	1	0
circ246	circATRNL1_11	chr10	115469329	115120185	+	ENSG00000107518	ATRNL1	down	down_turquoise	down	hsa.miR.148a.3p	up	-0.358576	0.000919439	ENSG00000186047	DLEU7			-0.250156	0.0164006	0.125572	0.144899	0.000216259	0	0	0	1
circ27587	circDDX3Y	chrY	12913062	12909360	+	ENSG00000067048	DDX3Y	down		down	hsa.chr5.14497.s	up	-0.242594	0.0193225	ENSG00000155545	MIER3			-0.28428	0.00739496	0.253298	0.0153007	0.000216371	0	0	0	1
circ206	circATRNL1_6	chr10	115268444	115120185	+	ENSG00000107518	ATRNL1	down		down	hsa.miR.148a.3p	up	-0.332569	0.00202179	ENSG00000111716	LDHB			-0.26023	0.0130915	0.164152	0.0826081	0.000216386	0	0	1	0
circ27587	circDDX3Y	chrY	12913062	12909360	+	ENSG00000067048	DDX3Y	down		down	hsa.chr5.14497.s	up	-0.242594	0.0193225	ENSG00000162601	MYSM1			-0.310613	0.00374121	0.220789	0.030252	0.000216422	0	0	0	1
circ217	circATRNL1_9	chr10	115315736	115120185	+	ENSG00000107518	ATRNL1	down	down_turquoise	down	hsa.miR.130b.5p	up	-0.298159	0.00520265	ENSG00000150995	ITPR1	1		-0.315161	0.00341104	0.137324	0.123321	0.000216559	1	1	1	0
circ206	circATRNL1_6	chr10	115268444	115120185	+	ENSG00000107518	ATRNL1	down		down	hsa.miR.363.3p	up	-0.317642	0.00308697	ENSG00000123505	AMD1			-0.309638	0.00395259	0.10891	0.17952	0.000216721	0	0	1	0
circ202	circATRNL1_5	chr10	115241725	115120185	+	ENSG00000107518	ATRNL1	down		down	hsa.miR.363.3p	up	-0.209506	0.0376264	ENSG00000113441	LNPEP			-0.392817	0.000322288	0.108382	0.180693	0.000216785	0	0	1	0
circ246	circATRNL1_11	chr10	115469329	115120185	+	ENSG00000107518	ATRNL1	down	down_turquoise	down	hsa.miR.708.5p	up	-0.280353	0.00814435	ENSG00000174032	SLC25A30			-0.289769	0.00657724	0.205051	0.0409065	0.000216792	0	0	1	0
circ246	circATRNL1_11	chr10	115469329	115120185	+	ENSG00000107518	ATRNL1	down	down_turquoise	down	hsa.miR.148a.3p	up	-0.358576	0.000919439	ENSG00000100934	SEC23A	1		-0.228405	0.0259728	0.15735	0.0918421	0.000216959	0	1	1	0
circ217	circATRNL1_9	chr10	115315736	115120185	+	ENSG00000107518	ATRNL1	down	down_turquoise	down	hsa.miR.130b.5p	up	-0.298159	0.00520265	ENSG00000178662	CSRNP3			-0.291158	0.00635396	0.177561	0.0664366	0.000217214	0	0	1	0
circ217	circATRNL1_9	chr10	115315736	115120185	+	ENSG00000107518	ATRNL1	down	down_turquoise	down	hsa.miR.130b.5p	up	-0.298159	0.00520265	ENSG00000057608	GDI2			-0.313433	0.00357295	0.140125	0.118521	0.000217803	0	0	0	1
circ246	circATRNL1_11	chr10	115469329	115120185	+	ENSG00000107518	ATRNL1	down	down_turquoise	down	hsa.miR.363.3p	up	-0.222003	0.0295342	ENSG00000115137	DNAJC27			-0.395347	0.000295591	0.0789837	0.253272	0.000218473	0	0	1	0
circ21473	circATG5	chr6	106248150	106308491	-	ENSG00000057663	ATG5	down	down_turquoise	down	hsa.miR.450b.5p	up	-0.202514	0.0428739	ENSG00000001084	GCLC			-0.391491	0.000337151	0.121452	0.153018	0.000218542	0	0	1	0
circ206	circATRNL1_6	chr10	115268444	115120185	+	ENSG00000107518	ATRNL1	down		down	hsa.miR.363.3p	up	-0.317642	0.00308697	ENSG00000091664	SLC17A6			-0.2757	0.00925271	0.168189	0.077461	0.000218595	0	0	0	1
circ206	circATRNL1_6	chr10	115268444	115120185	+	ENSG00000107518	ATRNL1	down		down	hsa.miR.148a.3p	up	-0.332569	0.00202179	ENSG00000153558	FBXL2			-0.278155	0.00859146	0.134645	0.128035	0.000219567	0	0	1	0
circ206	circATRNL1_6	chr10	115268444	115120185	+	ENSG00000107518	ATRNL1	down		down	hsa.miR.148a.3p	up	-0.332569	0.00202179	ENSG00000179387	ELMOD2			-0.210896	0.036647	0.221046	0.030099	0.000220085	0	0	1	0
circ7234	circNEMF_1	chr14	49795791	49831361	-	ENSG00000165525	NEMF		down_turquoise	down	hsa.miR.450b.5p	up	-0.228948	0.0256873	ENSG00000087274	ADD1			-0.359404	0.000952147	0.157766	0.0912567	0.000220244	0	0	1	0
circ246	circATRNL1_11	chr10	115469329	115120185	+	ENSG00000107518	ATRNL1	down	down_turquoise	down	hsa.miR.148a.3p	up	-0.358576	0.000919439	ENSG00000196305	IARS			-0.241548	0.0197586	0.137512	0.122995	0.000220452	0	0	1	0
circ246	circATRNL1_11	chr10	115469329	115120185	+	ENSG00000107518	ATRNL1	down	down_turquoise	down	hsa.miR.148a.3p	up	-0.358576	0.000919439	ENSG00000138604	GLCE			-0.279235	0.00836915	0.0657015	0.290384	0.000220457	0	0	1	0
circ217	circATRNL1_9	chr10	115315736	115120185	+	ENSG00000107518	ATRNL1	down	down_turquoise	down	hsa.miR.130b.5p	up	-0.298159	0.00520265	ENSG00000137656	BUD13			-0.310687	0.00384425	0.144141	0.111869	0.000220704	0	0	1	0
circ219	circATRNL1_10	chr10	115315736	115215697	+	ENSG00000107518	ATRNL1		down_turquoise	down	hsa.miR.424.5p	up	-0.239222	0.0207584	ENSG00000154734	ADAMTS1			-0.320992	0.0029114	0.210263	0.0370905	0.000221058	0	0	1	0
circ202	circATRNL1_5	chr10	115241725	115120185	+	ENSG00000107518	ATRNL1	down		down	hsa.miR.363.3p	up	-0.209506	0.0376264	ENSG00000127995	CASD1	1		-0.391121	0.00034141	0.110962	0.175	0.000221605	0	1	1	0
circ7886	circVRK1	chr14	96860735	96833467	+	ENSG00000100749	VRK1		down_turquoise	down	hsa.miR.450b.5p	up	-0.273195	0.00967881	ENSG00000108443	RPS6KB1			-0.312446	0.00366849	0.180382	0.0633629	0.000221752	0	0	1	0
circ27587	circDDX3Y	chrY	12913062	12909360	+	ENSG00000067048	DDX3Y	down		down	hsa.chr5.14497.s	up	-0.242594	0.0193225	ENSG00000164418	GRIK2			-0.313652	0.00344475	0.214932	0.0339183	0.000222415	1	0	0	0
circ206	circATRNL1_6	chr10	115268444	115120185	+	ENSG00000107518	ATRNL1	down		down	hsa.miR.363.3p	up	-0.317642	0.00308697	ENSG00000137845	ADAM10			-0.300074	0.00507104	0.125807	0.144445	0.000222713	0	0	1	0
circ246	circATRNL1_11	chr10	115469329	115120185	+	ENSG00000107518	ATRNL1	down	down_turquoise	down	hsa.miR.130b.5p	up	-0.286115	0.00706556	ENSG00000113649	TCERG1			-0.335493	0.00193883	0.115406	0.16546	0.000223174	0	0	1	0
circ219	circATRNL1_10	chr10	115315736	115215697	+	ENSG00000107518	ATRNL1		down_turquoise	down	hsa.miR.708.5p	up	-0.199181	0.0455711	ENSG00000180370	PAK2			-0.310009	0.00391405	0.2614	0.0127465	0.00022376	0	0	1	0
circ206	circATRNL1_6	chr10	115268444	115120185	+	ENSG00000107518	ATRNL1	down		down	hsa.miR.148a.3p	up	-0.332569	0.00202179	ENSG00000135298	ADGRB3			-0.221725	0.0296972	0.209122	0.0379006	0.000223932	0	0	0	1
circ206	circATRNL1_6	chr10	115268444	115120185	+	ENSG00000107518	ATRNL1	down		down	hsa.chr9.24118.m	up	-0.339495	0.0016496	ENSG00000114573	ATP6V1A			-0.248766	0.0170369	0.165414	0.080972	0.000223936	0	0	0	1
circ217	circATRNL1_9	chr10	115315736	115120185	+	ENSG00000107518	ATRNL1	down	down_turquoise	down	hsa.chr5.14497.s	up	-0.251479	0.0159295	ENSG00000115760	BIRC6			-0.354069	0.001059	0.130815	0.134983	0.000224057	1	0	0	0
circ206	circATRNL1_6	chr10	115268444	115120185	+	ENSG00000107518	ATRNL1	down		down	hsa.miR.363.3p	up	-0.317642	0.00308697	ENSG00000023516	AKAP11			-0.304363	0.00453922	0.116766	0.162607	0.000224179	0	0	1	0
circ246	circATRNL1_11	chr10	115469329	115120185	+	ENSG00000107518	ATRNL1	down	down_turquoise	down	hsa.miR.363.3p	up	-0.222003	0.0295342	ENSG00000198168	SVIP			-0.37264	0.000627941	0.137589	0.122861	0.000224181	0	0	1	0
circ206	circATRNL1_6	chr10	115268444	115120185	+	ENSG00000107518	ATRNL1	down		down	hsa.miR.148a.3p	up	-0.332569	0.00202179	ENSG00000077254	USP33	1		-0.251282	0.0159989	0.173878	0.0706174	0.000224659	0	1	1	0
circ5511	circARID1A	chr1	26732792	26729651	+	ENSG00000117713	ARID1A	up		up	hsa.miR.204.3p	down	-0.37186	0.000599038	ENSG00000117543	DPH5			-0.238739	0.0210873	0.108274	0.180935	0.000224774	0	0	0	1
circ19323	circGRK4	chr4	3029409	2984513	+	ENSG00000125388	GRK4	down		down	hsa.miR.450b.5p	up	-0.198287	0.046317	ENSG00000117016	RIMS3			-0.29631	0.00558198	0.276824	0.00887255	0.000225477	1	0	1	0
circ27587	circDDX3Y	chrY	12913062	12909360	+	ENSG00000067048	DDX3Y	down		down	hsa.miR.148a.3p	up	-0.340794	0.00158703	ENSG00000064726	BTBD1			-0.200807	0.0442391	0.216754	0.0327412	0.000225882	0	0	1	0
circ217	circATRNL1_9	chr10	115315736	115120185	+	ENSG00000107518	ATRNL1	down	down_turquoise	down	hsa.miR.130b.5p	up	-0.298159	0.00520265	ENSG00000172667	ZMAT3			-0.237505	0.0216371	0.239997	0.0204205	0.000225884	0	0	1	0
circ246	circATRNL1_11	chr10	115469329	115120185	+	ENSG00000107518	ATRNL1	down	down_turquoise	down	hsa.miR.363.3p	up	-0.222003	0.0295342	ENSG00000095002	MSH2			-0.381741	0.000467084	0.114511	0.167354	0.000226718	0	0	1	0
circ217	circATRNL1_9	chr10	115315736	115120185	+	ENSG00000107518	ATRNL1	down	down_turquoise	down	hsa.miR.130b.5p	up	-0.298159	0.00520265	ENSG00000160551	TAOK1			-0.285882	0.0072391	0.182273	0.0613642	0.000226928	0	0	1	0
circ246	circATRNL1_11	chr10	115469329	115120185	+	ENSG00000107518	ATRNL1	down	down_turquoise	down	hsa.miR.148a.3p	up	-0.358576	0.000919439	ENSG00000165813	CCDC186			-0.246546	0.0177455	0.127192	0.141786	0.000227115	0	0	1	0
circ246	circATRNL1_11	chr10	115469329	115120185	+	ENSG00000107518	ATRNL1	down	down_turquoise	down	hsa.miR.148a.3p	up	-0.358576	0.000919439	ENSG00000040341	STAU2	1		-0.272309	0.00988511	0.0783512	0.254982	0.000227462	0	1	1	0
circ16286	circZNF638_2	chr2	71427414	71426460	+	ENSG00000075292	ZNF638	down		down	hsa.miR.766.3p	up	-0.311524	0.00365004	ENSG00000171940	ZNF217		1	-0.318586	0.00310915	0.0980824	0.204531	0.000227769	0	0	1	0
circ206	circATRNL1_6	chr10	115268444	115120185	+	ENSG00000107518	ATRNL1	down		down	hsa.miR.148a.3p	up	-0.332569	0.00202179	ENSG00000124172	ATP5E			-0.198539	0.0461055	0.23043	0.0249224	0.00022794	0	0	1	0
circ27587	circDDX3Y	chrY	12913062	12909360	+	ENSG00000067048	DDX3Y	down		down	hsa.miR.148a.3p	up	-0.340794	0.00158703	ENSG00000165660	ABRAXAS2			-0.195701	0.0485283	0.220822	0.0302325	0.00022838	0	0	1	0
circ20873	circPARP8	chr5	50763242	50750151	+	ENSG00000151883	PARP8	down		down	hsa.miR.363.3p	up	-0.202403	0.0429616	ENSG00000104427	ZC2HC1A			-0.412131	0.000163825	0.0520505	0.330932	0.000228446	0	0	1	0
circ246	circATRNL1_11	chr10	115469329	115120185	+	ENSG00000107518	ATRNL1	down	down_turquoise	down	hsa.miR.363.3p	up	-0.222003	0.0295342	ENSG00000147124	ZNF41			-0.36107	0.000904359	0.160698	0.0872079	0.000228455	0	0	1	0
circ246	circATRNL1_11	chr10	115469329	115120185	+	ENSG00000107518	ATRNL1	down	down_turquoise	down	hsa.miR.148a.3p	up	-0.358576	0.000919439	ENSG00000132640	BTBD3			-0.278618	0.00849557	0.062863	0.298627	0.000228736	0	0	1	0
circ27587	circDDX3Y	chrY	12913062	12909360	+	ENSG00000067048	DDX3Y	down		down	hsa.miR.148a.3p	up	-0.340794	0.00158703	ENSG00000085832	EPS15	1		-0.253997	0.0150643	0.153316	0.097661	0.000228922	0	1	1	0
circ246	circATRNL1_11	chr10	115469329	115120185	+	ENSG00000107518	ATRNL1	down	down_turquoise	down	hsa.miR.148a.3p	up	-0.358576	0.000919439	ENSG00000163138	PACRGL			-0.262713	0.0123686	0.0977115	0.205422	0.000229028	0	0	1	0
circ246	circATRNL1_11	chr10	115469329	115120185	+	ENSG00000107518	ATRNL1	down	down_turquoise	down	hsa.miR.107	up	-0.399377	0.00023242	ENSG00000175093	SPSB4			-0.217574	0.0322921	0.0581888	0.312421	0.000229762	0	0	1	0
circ17709	circSLC4A7_1	chr3	27379249	27424152	-	ENSG00000033867	SLC4A7	down		down	hsa.miR.708.5p	up	-0.197115	0.0473089	ENSG00000180370	PAK2			-0.310009	0.00391405	0.26165	0.0126737	0.000229927	0	0	1	0
circ206	circATRNL1_6	chr10	115268444	115120185	+	ENSG00000107518	ATRNL1	down		down	hsa.miR.148a.3p	up	-0.332569	0.00202179	ENSG00000116459	ATP5F1			-0.230642	0.0248146	0.197696	0.0468149	0.000230087	0	0	1	0
circ27587	circDDX3Y	chrY	12913062	12909360	+	ENSG00000067048	DDX3Y	down		down	hsa.miR.148a.3p	up	-0.340794	0.00158703	ENSG00000160752	FDPS			-0.251344	0.0159771	0.156619	0.0928779	0.000230619	0	0	1	0
circ5511	circARID1A	chr1	26732792	26729651	+	ENSG00000117713	ARID1A	up		up	hsa.miR.204.3p	down	-0.37186	0.000599038	ENSG00000124783	SSR1			-0.254535	0.0150182	0.0758298	0.261858	0.000230684	0	0	0	1
circ5511	circARID1A	chr1	26732792	26729651	+	ENSG00000117713	ARID1A	up		up	hsa.miR.204.3p	down	-0.37186	0.000599038	ENSG00000253719	ATXN7L3B			-0.227971	0.0262983	0.12309	0.149755	0.000230968	0	0	0	1
circ20873	circPARP8	chr5	50763242	50750151	+	ENSG00000151883	PARP8	down		down	hsa.miR.363.3p	up	-0.202403	0.0429616	ENSG00000164338	UTP15			-0.397538	0.000274126	0.0997281	0.200604	0.000231245	0	0	1	0
circ27587	circDDX3Y	chrY	12913062	12909360	+	ENSG00000067048	DDX3Y	down		down	hsa.chr9.24118.m	up	-0.210328	0.0370448	ENSG00000085511	MAP3K4			-0.296989	0.00548665	0.265387	0.0116286	0.000231333	0	0	0	1
circ246	circATRNL1_11	chr10	115469329	115120185	+	ENSG00000107518	ATRNL1	down	down_turquoise	down	hsa.miR.107	up	-0.399377	0.00023242	ENSG00000152332	UHMK1			-0.196347	0.0479622	0.094981	0.212052	0.000231357	0	0	1	0
circ217	circATRNL1_9	chr10	115315736	115120185	+	ENSG00000107518	ATRNL1	down	down_turquoise	down	hsa.miR.130b.5p	up	-0.298159	0.00520265	ENSG00000090612	ZNF268			-0.307201	0.00421475	0.146651	0.107846	0.000231443	0	0	0	1
circ246	circATRNL1_11	chr10	115469329	115120185	+	ENSG00000107518	ATRNL1	down	down_turquoise	down	hsa.miR.148a.3p	up	-0.358576	0.000919439	ENSG00000127995	CASD1	1		-0.230888	0.0246894	0.148819	0.104453	0.00023197	0	1	1	0
circ246	circATRNL1_11	chr10	115469329	115120185	+	ENSG00000107518	ATRNL1	down	down_turquoise	down	hsa.miR.363.3p	up	-0.222003	0.0295342	ENSG00000073910	FRY			-0.375077	0.000580551	0.128935	0.138485	0.000232252	0	0	1	0
circ206	circATRNL1_6	chr10	115268444	115120185	+	ENSG00000107518	ATRNL1	down		down	hsa.miR.148a.3p	up	-0.332569	0.00202179	ENSG00000040341	STAU2	1		-0.272309	0.00988511	0.139851	0.118986	0.000232546	0	1	1	0
circ246	circATRNL1_11	chr10	115469329	115120185	+	ENSG00000107518	ATRNL1	down	down_turquoise	down	hsa.miR.130b.5p	up	-0.286115	0.00706556	ENSG00000069275	NUCKS1			-0.318524	0.00311437	0.146506	0.108076	0.000232562	0	0	1	0
circ15905	circNRXN1_3	chr2	50472298	50620183	-	ENSG00000179915	NRXN1	down		down	hsa.miR.629.5p	up	-0.30334	0.0045432	ENSG00000142599	RERE			-0.28366	0.00764264	0.175701	0.0685239	0.000232655	1	0	1	0
circ246	circATRNL1_11	chr10	115469329	115120185	+	ENSG00000107518	ATRNL1	down	down_turquoise	down	hsa.miR.363.3p	up	-0.222003	0.0295342	ENSG00000058272	PPP1R12A			-0.377206	0.000541843	0.123613	0.148724	0.000232716	0	0	1	0
circ217	circATRNL1_9	chr10	115315736	115120185	+	ENSG00000107518	ATRNL1	down	down_turquoise	down	hsa.miR.130b.5p	up	-0.298159	0.00520265	ENSG00000101782	RIOK3			-0.346909	0.00138961	0.0524458	0.329727	0.000233035	0	0	0	1
circ246	circATRNL1_11	chr10	115469329	115120185	+	ENSG00000107518	ATRNL1	down	down_turquoise	down	hsa.let.7g.3p	up	-0.219735	0.0308871	ENSG00000071794	HLTF			-0.335431	0.00194226	0.206515	0.0398047	0.000233377	0	0	1	0
circ7886	circVRK1	chr14	96860735	96833467	+	ENSG00000100749	VRK1		down_turquoise	down	hsa.miR.450b.5p	up	-0.273195	0.00967881	ENSG00000146247	PHIP			-0.320591	0.00294356	0.162966	0.0841673	0.000234217	1	0	1	0
circ5511	circARID1A	chr1	26732792	26729651	+	ENSG00000117713	ARID1A	up		up	hsa.miR.204.3p	down	-0.37186	0.000599038	ENSG00000140382	HMG20A			-0.222757	0.0291785	0.129617	0.137207	0.000234242	0	0	0	1
circ5511	circARID1A	chr1	26732792	26729651	+	ENSG00000117713	ARID1A	up		up	hsa.miR.204.3p	down	-0.37186	0.000599038	ENSG00000168002	POLR2G			-0.215445	0.0336467	0.139813	0.11905	0.000234351	0	0	0	1
circ246	circATRNL1_11	chr10	115469329	115120185	+	ENSG00000107518	ATRNL1	down	down_turquoise	down	hsa.miR.148a.3p	up	-0.358576	0.000919439	ENSG00000108946	PRKAR1A	1		-0.237229	0.0216478	0.138792	0.120789	0.000234738	0	1	1	0
circ15905	circNRXN1_3	chr2	50472298	50620183	-	ENSG00000179915	NRXN1	down		down	hsa.miR.708.5p	up	-0.216171	0.0331142	ENSG00000149289	ZC3H12C			-0.383099	0.000446608	0.116762	0.162615	0.000234801	0	0	1	0
circ15905	circNRXN1_3	chr2	50472298	50620183	-	ENSG00000179915	NRXN1	down		down	hsa.miR.629.5p	up	-0.30334	0.0045432	ENSG00000180537	RNF182			-0.352339	0.00118115	0.015246	0.449066	0.000235208	0	0	1	0
circ202	circATRNL1_5	chr10	115241725	115120185	+	ENSG00000107518	ATRNL1	down		down	hsa.miR.363.3p	up	-0.209506	0.0376264	ENSG00000143669	LYST			-0.391583	0.000336094	0.103999	0.190621	0.000235277	0	0	1	0
circ27587	circDDX3Y	chrY	12913062	12909360	+	ENSG00000067048	DDX3Y	down		down	hsa.miR.148a.3p	up	-0.340794	0.00158703	ENSG00000183662	FAM19A1			-0.246392	0.0178049	0.162053	0.0853811	0.000235445	0	0	0	1
circ206	circATRNL1_6	chr10	115268444	115120185	+	ENSG00000107518	ATRNL1	down		down	hsa.miR.363.3p	up	-0.317642	0.00308697	ENSG00000119912	IDE			-0.288196	0.00683852	0.142392	0.114734	0.000236236	0	0	1	0
circ246	circATRNL1_11	chr10	115469329	115120185	+	ENSG00000107518	ATRNL1	down	down_turquoise	down	hsa.miR.148a.3p	up	-0.358576	0.000919439	ENSG00000169139	UBE2V2			-0.247426	0.0174097	0.122255	0.151413	0.000236372	0	0	1	0
circ246	circATRNL1_11	chr10	115469329	115120185	+	ENSG00000107518	ATRNL1	down	down_turquoise	down	hsa.miR.148a.3p	up	-0.358576	0.000919439	ENSG00000110148	CCKBR			-0.259458	0.0133231	0.100889	0.19786	0.000236376	0	0	1	0
circ20873	circPARP8	chr5	50763242	50750151	+	ENSG00000151883	PARP8	down		down	hsa.miR.363.3p	up	-0.202403	0.0429616	ENSG00000152443	ZNF776			-0.410002	0.000176844	0.0559844	0.319019	0.000236377	0	0	1	0
circ217	circATRNL1_9	chr10	115315736	115120185	+	ENSG00000107518	ATRNL1	down	down_turquoise	down	hsa.miR.130b.5p	up	-0.298159	0.00520265	ENSG00000102471	NDFIP2			-0.303499	0.00464223	0.151492	0.100377	0.000236422	0	0	0	1
circ246	circATRNL1_11	chr10	115469329	115120185	+	ENSG00000107518	ATRNL1	down	down_turquoise	down	hsa.miR.130b.5p	up	-0.286115	0.00706556	ENSG00000144290	SLC4A10			-0.330557	0.00223119	0.120959	0.15401	0.000236724	1	0	0	0
circ206	circATRNL1_6	chr10	115268444	115120185	+	ENSG00000107518	ATRNL1	down		down	hsa.miR.363.3p	up	-0.317642	0.00308697	ENSG00000150054	MPP7			-0.311243	0.00378796	0.0967515	0.207739	0.000236829	0	0	1	0
circ206	circATRNL1_6	chr10	115268444	115120185	+	ENSG00000107518	ATRNL1	down		down	hsa.miR.148a.3p	up	-0.332569	0.00202179	ENSG00000147246	HTR2C			-0.200467	0.0445146	0.226455	0.0270182	0.000237033	0	0	0	1
circ246	circATRNL1_11	chr10	115469329	115120185	+	ENSG00000107518	ATRNL1	down	down_turquoise	down	hsa.miR.363.3p	up	-0.222003	0.0295342	ENSG00000163577	EIF5A2	1		-0.350827	0.00123616	0.177297	0.0667302	0.000237421	0	1	1	0
circ246	circATRNL1_11	chr10	115469329	115120185	+	ENSG00000107518	ATRNL1	down	down_turquoise	down	hsa.miR.130b.5p	up	-0.286115	0.00706556	ENSG00000077514	POLD3			-0.245711	0.0181949	0.243338	0.0190171	0.000238133	0	0	1	0
circ206	circATRNL1_6	chr10	115268444	115120185	+	ENSG00000107518	ATRNL1	down		down	hsa.miR.363.3p	up	-0.317642	0.00308697	ENSG00000157107	FCHO2			-0.263452	0.0122977	0.179396	0.0644244	0.000238212	0	0	1	0
circ206	circATRNL1_6	chr10	115268444	115120185	+	ENSG00000107518	ATRNL1	down		down	hsa.miR.148a.3p	up	-0.332569	0.00202179	ENSG00000114573	ATP6V1A			-0.254337	0.0149508	0.165414	0.080972	0.000238366	0	0	1	0
circ217	circATRNL1_9	chr10	115315736	115120185	+	ENSG00000107518	ATRNL1	down	down_turquoise	down	hsa.miR.130b.5p	up	-0.298159	0.00520265	ENSG00000145833	DDX46			-0.286314	0.00716282	0.178241	0.0656855	0.000238387	0	0	1	0
circ16286	circZNF638_2	chr2	71427414	71426460	+	ENSG00000075292	ZNF638	down		down	hsa.miR.766.3p	up	-0.311524	0.00365004	ENSG00000184154	LRTOMT			-0.33682	0.00186633	0.0428367	0.359482	0.000238473	0	0	0	1
circ246	circATRNL1_11	chr10	115469329	115120185	+	ENSG00000107518	ATRNL1	down	down_turquoise	down	hsa.miR.130b.5p	up	-0.286115	0.00706556	ENSG00000079459	FDFT1			-0.347063	0.00138326	0.0798784	0.250863	0.000238721	0	0	1	0
circ246	circATRNL1_11	chr10	115469329	115120185	+	ENSG00000107518	ATRNL1	down	down_turquoise	down	hsa.miR.148a.3p	up	-0.358576	0.000919439	ENSG00000111530	CAND1			-0.236457	0.0220004	0.138484	0.121318	0.000238905	0	0	1	0
circ27587	circDDX3Y	chrY	12913062	12909360	+	ENSG00000067048	DDX3Y	down		down	hsa.miR.148a.3p	up	-0.340794	0.00158703	ENSG00000181751	C5orf30			-0.222774	0.0290851	0.190543	0.0531845	0.000238982	0	0	1	0
circ19323	circGRK4	chr4	3029409	2984513	+	ENSG00000125388	GRK4	down		down	hsa.miR.450b.5p	up	-0.198287	0.046317	ENSG00000172817	CYP7B1			-0.381032	0.000478125	0.144725	0.110923	0.000239104	0	0	0	1
circ206	circATRNL1_6	chr10	115268444	115120185	+	ENSG00000107518	ATRNL1	down		down	hsa.chr9.24118.m	up	-0.339495	0.0016496	ENSG00000122584	NXPH1			-0.203597	0.0420475	0.212504	0.0355393	0.000239826	1	0	0	0
circ17709	circSLC4A7_1	chr3	27379249	27424152	-	ENSG00000033867	SLC4A7	down		down	hsa.miR.629.5p	up	-0.197751	0.0467681	ENSG00000183508	FAM46C		1	-0.266568	0.0114516	0.302837	0.00460388	0.000239879	0	0	1	0
circ206	circATRNL1_6	chr10	115268444	115120185	+	ENSG00000107518	ATRNL1	down		down	hsa.miR.148a.3p	up	-0.332569	0.00202179	ENSG00000197045	GMFB			-0.214629	0.0341174	0.211959	0.035912	0.000240832	0	0	1	0
circ16286	circZNF638_2	chr2	71427414	71426460	+	ENSG00000075292	ZNF638	down		down	hsa.miR.766.3p	up	-0.311524	0.00365004	ENSG00000136044	APPL2			-0.337714	0.00181881	0.0384016	0.373515	0.000241042	0	0	1	0
circ246	circATRNL1_11	chr10	115469329	115120185	+	ENSG00000107518	ATRNL1	down	down_turquoise	down	hsa.miR.148a.3p	up	-0.358576	0.000919439	ENSG00000134987	WDR36			-0.224718	0.0279782	0.154172	0.0964041	0.000241064	0	0	1	0
circ246	circATRNL1_11	chr10	115469329	115120185	+	ENSG00000107518	ATRNL1	down	down_turquoise	down	hsa.miR.148a.3p	up	-0.358576	0.000919439	ENSG00000116030	SUMO1			-0.236103	0.0221642	0.138252	0.121716	0.000241104	0	0	1	0
circ246	circATRNL1_11	chr10	115469329	115120185	+	ENSG00000107518	ATRNL1	down	down_turquoise	down	hsa.miR.130b.5p	up	-0.286115	0.00706556	ENSG00000040341	STAU2	1		-0.347186	0.0013782	0.0783512	0.254982	0.000241317	0	1	1	0
circ246	circATRNL1_11	chr10	115469329	115120185	+	ENSG00000107518	ATRNL1	down	down_turquoise	down	hsa.miR.148a.3p	up	-0.358576	0.000919439	ENSG00000135940	COX5B			-0.227356	0.026531	0.150547	0.101805	0.000241352	0	0	1	0
circ206	circATRNL1_6	chr10	115268444	115120185	+	ENSG00000107518	ATRNL1	down		down	hsa.miR.363.3p	up	-0.317642	0.00308697	ENSG00000166986	MARS			-0.294767	0.00580403	0.128831	0.138681	0.000241464	0	0	1	0
circ206	circATRNL1_6	chr10	115268444	115120185	+	ENSG00000107518	ATRNL1	down		down	hsa.miR.148a.3p	up	-0.332569	0.00202179	ENSG00000116030	SUMO1			-0.236103	0.0221642	0.188001	0.0556034	0.000242041	0	0	1	0
circ246	circATRNL1_11	chr10	115469329	115120185	+	ENSG00000107518	ATRNL1	down	down_turquoise	down	hsa.miR.107	up	-0.399377	0.00023242	ENSG00000138386	NAB1			-0.200389	0.0445892	0.0837968	0.240454	0.000242063	0	0	1	0
circ246	circATRNL1_11	chr10	115469329	115120185	+	ENSG00000107518	ATRNL1	down	down_turquoise	down	hsa.miR.148a.3p	up	-0.358576	0.000919439	ENSG00000172869	DMXL1			-0.232585	0.0238429	0.143019	0.1137	0.000242115	0	0	1	0
circ206	circATRNL1_6	chr10	115268444	115120185	+	ENSG00000107518	ATRNL1	down		down	hsa.miR.363.3p	up	-0.317642	0.00308697	ENSG00000143401	ANP32E			-0.227724	0.0264291	0.220282	0.0305561	0.000242149	0	0	1	0
circ246	circATRNL1_11	chr10	115469329	115120185	+	ENSG00000107518	ATRNL1	down	down_turquoise	down	hsa.miR.148a.3p	up	-0.358576	0.000919439	ENSG00000141367	CLTC			-0.22515	0.0277369	0.153247	0.0977629	0.000242168	0	0	1	0
circ27587	circDDX3Y	chrY	12913062	12909360	+	ENSG00000067048	DDX3Y	down		down	hsa.miR.148a.3p	up	-0.340794	0.00158703	ENSG00000129625	REEP5			-0.198786	0.0458994	0.214428	0.0342501	0.000242311	0	0	1	0
circ27587	circDDX3Y	chrY	12913062	12909360	+	ENSG00000067048	DDX3Y	down		down	hsa.miR.148a.3p	up	-0.340794	0.00158703	ENSG00000105887	MTPN			-0.213734	0.0347105	0.199491	0.0453143	0.00024242	0	0	1	0
circ217	circATRNL1_9	chr10	115315736	115120185	+	ENSG00000107518	ATRNL1	down	down_turquoise	down	hsa.miR.130b.5p	up	-0.298159	0.00520265	ENSG00000150636	CCDC102B			-0.261416	0.0128788	0.209896	0.037349	0.000242946	0	0	0	1
circ217	circATRNL1_9	chr10	115315736	115120185	+	ENSG00000107518	ATRNL1	down	down_turquoise	down	hsa.miR.130b.5p	up	-0.298159	0.00520265	ENSG00000104497	SNX16			-0.323831	0.00269254	0.109296	0.178664	0.000242968	0	0	1	0
circ206	circATRNL1_6	chr10	115268444	115120185	+	ENSG00000107518	ATRNL1	down		down	hsa.miR.148a.3p	up	-0.332569	0.00202179	ENSG00000112541	PDE10A	1		-0.28846	0.00666329	0.105964	0.186131	0.00024336	0	1	1	0
circ27587	circDDX3Y	chrY	12913062	12909360	+	ENSG00000067048	DDX3Y	down		down	hsa.miR.148a.3p	up	-0.340794	0.00158703	ENSG00000198380	GFPT1			-0.200822	0.0442266	0.212215	0.0357365	0.000243426	0	0	1	0
circ246	circATRNL1_11	chr10	115469329	115120185	+	ENSG00000107518	ATRNL1	down	down_turquoise	down	hsa.miR.363.3p	up	-0.222003	0.0295342	ENSG00000168300	PCMTD1			-0.365852	0.000778976	0.145873	0.109082	0.000243532	0	0	1	0
circ202	circATRNL1_5	chr10	115241725	115120185	+	ENSG00000107518	ATRNL1	down		down	hsa.miR.363.3p	up	-0.209506	0.0376264	ENSG00000144290	SLC4A10			-0.395409	0.000294966	0.0893107	0.226205	0.000243611	1	0	0	0
circ5511	circARID1A	chr1	26732792	26729651	+	ENSG00000117713	ARID1A	up		up	hsa.miR.204.3p	down	-0.37186	0.000599038	ENSG00000116747	TROVE2			-0.232537	0.0239719	0.110751	0.175462	0.000244368	0	0	0	1
circ246	circATRNL1_11	chr10	115469329	115120185	+	ENSG00000107518	ATRNL1	down	down_turquoise	down	hsa.miR.130b.5p	up	-0.286115	0.00706556	ENSG00000047932	GOPC			-0.339658	0.00171928	0.0966316	0.20803	0.000244987	0	0	1	0
circ206	circATRNL1_6	chr10	115268444	115120185	+	ENSG00000107518	ATRNL1	down		down	hsa.miR.148a.3p	up	-0.332569	0.00202179	ENSG00000112425	EPM2A			-0.232462	0.0239036	0.191336	0.0524463	0.000245613	0	0	1	0
circ3279	circFAT3	chr11	92355404	92352096	+	ENSG00000165323	FAT3	down	down_turquoise	down	hsa.miR.708.5p	up	-0.276348	0.00911154	ENSG00000127603	MACF1			-0.339874	0.00170853	0.116613	0.162926	0.000245755	0	0	1	0
circ246	circATRNL1_11	chr10	115469329	115120185	+	ENSG00000107518	ATRNL1	down	down_turquoise	down	hsa.miR.148a.3p	up	-0.358576	0.000919439	ENSG00000135549	PKIB			-0.25372	0.0151578	0.107461	0.182753	0.000246636	0	0	1	0
circ246	circATRNL1_11	chr10	115469329	115120185	+	ENSG00000107518	ATRNL1	down	down_turquoise	down	hsa.miR.130b.5p	up	-0.286115	0.00706556	ENSG00000100528	CNIH1			-0.341448	0.001632	0.091402	0.220925	0.00024668	0	0	1	0
circ27587	circDDX3Y	chrY	12913062	12909360	+	ENSG00000067048	DDX3Y	down		down	hsa.chr5.14497.s	up	-0.242594	0.0193225	ENSG00000128923	MINDY2			-0.314346	0.00338	0.207496	0.0390788	0.000247074	0	0	0	1
circ217	circATRNL1_9	chr10	115315736	115120185	+	ENSG00000107518	ATRNL1	down	down_turquoise	down	hsa.miR.130b.5p	up	-0.298159	0.00520265	ENSG00000110429	FBXO3			-0.342219	0.00159561	0.0597969	0.307645	0.000247211	0	0	1	0
circ206	circATRNL1_6	chr10	115268444	115120185	+	ENSG00000107518	ATRNL1	down		down	hsa.miR.148a.3p	up	-0.332569	0.00202179	ENSG00000111843	TMEM14C			-0.212994	0.0352075	0.211927	0.0359333	0.000247536	0	0	1	0
circ206	circATRNL1_6	chr10	115268444	115120185	+	ENSG00000107518	ATRNL1	down		down	hsa.miR.148a.3p	up	-0.332569	0.00202179	ENSG00000123178	SPRYD7			-0.254414	0.0149251	0.162188	0.0852013	0.000248628	0	0	1	0
circ217	circATRNL1_9	chr10	115315736	115120185	+	ENSG00000107518	ATRNL1	down	down_turquoise	down	hsa.chr5.14497.s	up	-0.251479	0.0159295	ENSG00000173889	PHC3			-0.363402	0.000788553	0.0979937	0.204744	0.000248699	0	0	0	1
circ17709	circSLC4A7_1	chr3	27379249	27424152	-	ENSG00000033867	SLC4A7	down		down	hsa.miR.629.5p	up	-0.197751	0.0467681	ENSG00000140450	ARRDC4			-0.252993	0.0155371	0.312602	0.00354474	0.000249023	0	0	1	0
circ206	circATRNL1_6	chr10	115268444	115120185	+	ENSG00000107518	ATRNL1	down		down	hsa.miR.363.3p	up	-0.317642	0.00308697	ENSG00000116539	ASH1L			-0.304733	0.00449569	0.10612	0.185778	0.000249229	1	0	1	0
circ7886	circVRK1	chr14	96860735	96833467	+	ENSG00000100749	VRK1		down_turquoise	down	hsa.miR.450b.5p	up	-0.273195	0.00967881	ENSG00000213672	NCKIPSD			-0.341232	0.00164232	0.116871	0.162387	0.000249479	0	0	1	0
circ246	circATRNL1_11	chr10	115469329	115120185	+	ENSG00000107518	ATRNL1	down	down_turquoise	down	hsa.miR.130b.5p	up	-0.286115	0.00706556	ENSG00000198825	INPP5F	1		-0.334444	0.00199792	0.107322	0.183064	0.000249724	0	1	1	0
circ206	circATRNL1_6	chr10	115268444	115120185	+	ENSG00000107518	ATRNL1	down		down	hsa.miR.148a.3p	up	-0.332569	0.00202179	ENSG00000198718	TOGARAM1			-0.274237	0.00944118	0.130483	0.135597	0.000250061	0	0	1	0
circ246	circATRNL1_11	chr10	115469329	115120185	+	ENSG00000107518	ATRNL1	down	down_turquoise	down	hsa.miR.148a.3p	up	-0.358576	0.000919439	ENSG00000140280	LYSMD2			-0.232585	0.0238429	0.140304	0.118219	0.000250336	0	0	1	0
[truncated: 6,289 more rows]

## Sheet: Target genes vs. diseases
Targets of the identified ASD-associated circRNA-miRNA-mRNA axes	Gene type	SFARI genes (1: yes)	SFARI_top (score=1-3 or S) (1: yes)	Austism_KB genes (1:yes)	iPSD (1: yes)	ePSD (1: yes)	Epilepsy (1:yes)	Schizophrenia GWAS (1: yes)	Parkinston rsik genes (1: yes)	Huntington risk genes (1: yes)	Alzheimer's disease risk genes (1:yes)	Amoythrophic Lateral Sclerosis (1:yes)	Intellectual disability (1: yes)	Neurogenerative diseases (1: yes)	Genes associated with human height (1: yes)	high-confidence ASD genetic risk genes_Satterstrom_et_al (1: yes)
[truncated: 2,299 more rows]
