# Supplementary material for: Genome-wide, integrative analysis of circular RNA dysregulation and the corresponding circular RNA-microRNA-mRNA regulatory axes in autism
Source: HighWire-hosted journal article supplement (doi:10.1101/gr.255463.119), 2020-03-01
Supplement: Supplemental_Table_S6_microarray_new.xlsx [file Supplemental_Table_S6_microarray_new.xlsx]

## Sheet: Note
Supplemental Table S6. Microarray analysis of the 171 target genes in the circARID1A-miR-204-3p-involved interactions in response to circARID1A knockdown, circARID1A overexpression, and miR-204-3p overexpression.
Value: (log2(fold change))
The 12 ASD risk genes (from SFARI or Autism_KB) are highlighted in yellow.
The RNA binding proteins (RBPs), FMRP, HuR, and RBFOX1, are highlighted in green. The binding targets of the three RBPs have been reported to be associated with ASD (see the text).
KD: knockdown; OE: overexpression

## Sheet: Microarray analysis in ReNcell
Gene Symbol	KD_circARID1A	OE_circARID1A	OE_miR-204-3p	SFARI (1: yes)	Autism_KB (1: yes)	FMR1_target (1: yes)	ELAVL1 (or HuR)_target (1: yes)	RBFOX1_target (1: yes)	Epilepsy (1:yes)	Huntington (1: yes)	Schizophrenia(GWAS) (1: yes)
CCDC91	-0.181674	0.327687	-0.310901	1			1
HSD11B1	0	0.214125	0.0840643	1
KRAS	-0.124328	0.0565835	-0.31034		1		1
NLGN1	-0.832649	0.726831	-0.651579	1			1
PECR	0.204724	-0.431979	0.304511	1
RLIM	0.0770762	-0.0459603	0.120542	1			1
STAG1	-0.475085	0.189034	-0.250962	1			1				1
TOMM20	-0.174514	0.130931	-0.0854693	1			1
UBA6	-0.432959	0.31034	-0.189034	1			1
USP45	-0.42372	0.427606	-0.472904	1			1
VIP	-0.124328	0	-0.124328	1	1
VLDLR	-0.263034	0.454176	0.124328	1
ABHD10	0.0458479	-0.146841	0.214125				1
AGPAT5	0.0840643	0.250962	-0.289655				1
AKR1A1	0.815575	-0.757023	0.641546
AMN1	-0.464668	0.536053	-0.263034
ANAPC7	-0.176887	0.099215	-0.150497				1
ANKRD13A	-0.0733167	-0.0211646	-0.0101882				1
ANXA6	0.967169	-0.426207	0.52122
AOX1	0.169556	0.480265	-0.0790522
APAF1	-0.321928	0.189034	-0.189034				1			1
APPL1	-0.13157	-0.351672	-0.0110784				1
ARL8B	-0.490552	0.0806275	-0.193288				1			1
ASB4	-0.0163725	0.0565835	-0.286784
ASB7	-0.270648	0.298658	-0.0876805				1
ATPAF1	-0.244861	-0.0517242	0.111633				1
ATXN7L3B	0.485427	-0.406197	0.189034
BEST1	0.137504	0.163499	0
C10orf25	-0.475085	0.0840643	-0.378512
C17orf102	0	0	0
C21orf91	-0.598552	0.356144	-0.425963
C5orf24	-0.286009	-0.288996	-0.274613
C8orf46	-0.163499	0.15056	0
C9orf3	-0.04798	-0.0565835	-0.0704356
CDC23	-0.613532	0.304511	-0.458955				1
CEP85	0.521051	-0.250579	0.495695
CHIC1	-0.321928	0	-0.0840643				1
CKAP5	1.1375	-1.13241	1.21723			1	1	1			1
COMMD4	1.17632	-0.584963	0.918386
COMMD9	0.594549	-0.454176	0.545968
COQ10A	0.201634	0	0.378512
COQ10B	-0.496871	0.541019	-0.280108				1				1
CORO1C	0.176323	0.176323	-0.479357				1
CPD	0	0.0976108	0.201634				1
CPEB1	0.599318	0.250962	-0.176379
DCAF16	-0.137504	0.0426443	-0.263034
DCAF8	0.15056	0.176323	-0.0565835
DCTN4	-0.124328	-0.111031	0				1
DDX42	0.321928	0	0.275007				1
DGKH	-0.485427	0	0				1	1
DHFR	0.495695	-0.613532	0.275007
DNAJC27	-0.0776546	0.190007	-0.0769513				1
DPH5	0.0703893	0.0565835	-0.411426
EMB	-0.0671142	0.329055	-0.284514				1
EMC3	-0.189034	0.111031	-0.238787
ERBB3	0.263034	0.0840643	-0.189034
ERCC8	0	-0.053499	-0.156318				1
F8	-0.555816	-0.321928	-0.238787
FAM220A	-0.31034	0.333424	-0.238787
FAM8A1	-0.516015	0.124328	-0.356144				1
FAXC	-0.340623	0.411426	-0.407081
FBXO36	-0.110908	-0.21624	0
FGF9	-0.0489096	0.0071955	-0.156783				1
FGFR1OP2	-0.263034	-0.0426443	0.0285692
FRMD5	0.105175	-0.0626889	0.07181				1
GLCE	-0.704872	0.201634	-0.333424				1
GLT8D1	-0.215931	0.0565835	-0.139046								1
GNPDA2	-0.659925	0.432959	-0.163499				1
GPAT3	-0.0285692	0.464668	-0.594549
HCCS	-0.0617002	0.00654285	0.232661				1
HDGFL3	0	0	0
HLCS	0.613532	-0.225734	0.432959				1
HMG20A	-0.163499	0.137504	-0.286881				1
HNRNPA3	-0.201634	-0.0143553	-0.111031				1
HTR5A	-0.400538	-0.176323	0.0285692
KAT14	0	0	0
LANCL1	0.0637736	-0.176878	-0.508943				1
LDHA	-0.0143553	-0.124328	0.189034
LIN52	0.268193	0.244887	-0.217947				1
LIPA	0.226509	-0.0703893	0.495695
LRRC40	-0.200826	0.118276	-0.31635				1
LSM11	0.316146	-0.289073	0.0372985				1
MAD2L1BP	-0.0565835	-0.333424	0.443607				1
MASTL	-0.333424	0.475085	-0.454176				1
MBD2	-0.117419	0.22033	0.0856836				1
MCAM	0.298658	-0.0120271	0.432959
MDM1	-0.600258	0.400538	-0.641901				1
MEAF6	-0.356144	0.124328	-0.176323
MED27	0.263034	-0.526069	0.389567				1
METAP1	-0.0840643	0.250962	-0.163499				1
MRPL11	0.555816	-0.411426	0.62293				1
MTMR6	-0.453868	0.298658	-0.685135				1
MTRR	-0.229496	0.327687	-0.186413				1
MYL6	0.298658	-0.398824	0.120817
NBAS	0.333424	0.0840643	0.0840643				1
NEMF	-0.522371	0.0189557	-0.372414
NR3C1	0.0285692	0.0285692	-0.0976108				1
OPALIN	-0.15056	0	0
OSBPL9	-0.217111	0.201634	-0.0756543				1	1
PAFAH1B2	-0.400538	0.176323	0.0840643				1
PDE8A	0.019653	-0.219748	0.304511				1
PFDN1	-0.0703893	0.15056	0.0143553				1
PIN4	-0.150091	0.333424	-0.150443				1
PLD5	-0.0733167	-0.174514	-0.0414199				1
POC1B	-0.687061	0.31034	-0.31034
POLR2C	0.0840643	-0.0285692	0.0976108
POLR2G	-0.0285692	-0.0703893	0.15056
PRDM5	-0.0756	0.475085	-0.270833				1
PRIM2	0.275007	0.0426443	0.321928				1
PRTFDC1	0.163499	-0.0565835	-0.0565835
PTP4A2	-0.13066	0.00110934	0.104337				1
PYM1	-0.0976108	-0.124328	0.201634
RAB11A	-0.454176	0.0426443	-0.321928				1			1
RAB3GAP1	-0.091423	-0.146841	0.0327539				1
RABEP1	0.111031	-0.495695	0.333424				1
RAP2A	-0.214125	0.111031	-0.0976108				1
RCAN3	-0.275007	0.286881	-0.15056				1
REEP5	-0.0790716	0.00772708	0.249404				1
RFC1	0.182692	-0.256608	0.327687				1
RHO	0.263034	-0.0608252	-0.0236868
RORB	0	-0.124328	-0.516015
RPE	-0.156318	0.158583	-0.0551747				1
RPL22	-0.0285692	0	0.0565835				1
RPS11	0.0635029	-0.0458549	-0.0432735
RSPO2	-0.124328	0.163499	-0.0840643				1
RSPO3	0	0.176323	-0.163499
SCRN1	0.641546	-1.0635	0.713696				1
SEC14L5	-0.286881	0.214125	-0.250962
SEL1L	-0.412526	0.327687	-0.226403				1
SEPT6	-0.238787	0.0840643	-0.0703893
SLC38A1	0.232661	-0.16869	-0.149505				1
SLC4A8	-0.137027	-0.21349	0.0426443			1
SLK	-0.325831	0.257011	0.0443108				1	1
SNRNP25	0.263034	-0.748461	0.604071
SPATA5	-0.137504	0	0.31034				1
SRPK2	-0.0256903	-0.00909509	-0.0163725				1				1
SSR1	0.18367	-0.024791	0.124328				1
ST3GAL5	-0.238787	0.389567	-0.124328						1
STXBP5L	0.111031	0	0.189034				1	1
SUMO1	-0.286881	-0.0143553	-0.189034				1
SYNJ2	0.275007	-0.286881	0.0285692				1			1
TCEANC2	0.111031	0	-0.0565835
TIMM23	-0.0321483	-0.00516171	0.0703893
TMED7	-0.833375	0.232661	-0.389731				1
TRAM1	-0.128415	-0.394088	0.660104				1
TROVE2	-0.275007	0	-0.545968				1
TTC30B	-0.226771	0.104337	-0.721989
TWF1	0.263034	0.0507026	-0.0151621				1
UTP11	0	0	0
UTS2B	0.163499	0.189034	0
VAPB	0.163499	0.163499	0				1
WDPCP	-0.0972972	0.0496308	-0.0944571
WDR47	-0.722466	0.356144	-0.604071				1
XPO4	-0.212839	0.401015	0.214125				1
XRCC5	0.214125	-0.124328	0.137504				1
YME1L1	-0.163499	0.238787	-0.150443				1
YPEL5	-0.505247	0.198466	-0.0835557
ZBED8	-0.189034	0.565597	-0.757023
ZC2HC1C	-0.163499	0.31034	0.226509
ZFP90	-0.250962	-0.163499	0.0285692				1
ZNF124	-0.0521986	0.130704	-0.204503				1
ZNF24	0.0285692	-0.485427	0.0976108				1
ZNF268	-0.495695	0.31034	-0.475085				1
ZNF3	-0.0955932	0.0426443	0.151127				1
ZNF33A	0	0.137504	-0.356144
ZNF510	-0.295992	-0.00981022	-0.0972147				1
ZNF627	-0.464668	0.31034	-0.356144				1
ZNF791	-0.238787	-0.0703893	-0.275007				1
ZNF81	0	0.176323	-0.150443				1
ZYG11B	0.0976108	-0.0285692	-0.275007				1
ZZZ3	-0.300635	0.119593	0.0678236				1
