# Supplementary material for: Genome-wide, integrative analysis of circular RNA dysregulation and the corresponding circular RNA-microRNA-mRNA regulatory axes in autism
Source: HighWire-hosted journal article supplement (doi:10.1101/gr.255463.119), 2020-03-01
Supplement: Supplemental_Table_S7_material_new.xlsx [file Supplemental_Table_S7_material_new.xlsx]

## Sheet: Note
Supplemental Table S7. The primer, siRNA, miRNA mimic, miRNA inhibitor sequences and antibodies used in this study.

## Sheet: Primer
# Primer sequences used for real-time qPCR assay
Name	Sequences (Forward)	Sequences (Reverse)
GAPDH	TCAATGACCCCTTCATTGACC	GCATCGCCCCACTTGATTT
circARID1A	CAGTCAAGACCCTCCAGCTT	GTCCCTGTTGCTGCGAGTAT
ARID1A	CATATGGCCCTCCTGCCAAG	TGTTTTGCTGGGCATTGGTG
CCDC91	GGTGGAAGTGGTGAAACCCA	GAAGAGTGGTCACGGTCCAG
FER	ATACACAGGGACCTTGCTGC	TAAGAGCTTCCGGTGCTGTC
HSD11B1	GCGCAAAAGCATGGAAGTCA	CACTTTCCCAGCCAGAGAGG
NLGN1	AGAGCAGTGATGGCATGCTT	CCAGTGGGTCCACATCATCC
PECR	GGAGCTGGGGAGTAATGTGG	CCTGCTTTGTGGGAGGTAGG
RLIM	AGGACAGAGACCTCCAACCA	ACCGAGTTCTGCTGGCTATG
STAG1	ACAGGGACATCGCACTTCTG	TTTTCCACTGAGGTCCAGGC
TOMM20	GAGAGAGCTGGGCTTTCCAA	TGTCAGATGGTCTACGCCCT
UBA6	GCCAACAATGGTGGTACAGG	TGTCTGGAGCAAATGACACAGT
USP45	GCTGACAGTGAGCCTTCAGA	GGTAAAGGGGTCCATCTGGC
VIP	TCTTGGGTCAACTTTCTGCC	CCTCACTGCTCCTCTTTCCATT
VLDLR	ACTTCGTGTGCAACAATGGC	GCGGCATGTTCTCATATGGC
FN1	CTGGCCAGTCCTACAACCAG	ATGAAGCACTCAATTGGGCA
# Primer sequences used for site-directed mutagenesis
Name	Sequences (Forward)	Sequences (Reverse)
mir204_BindingSite_1	CCCAGCAAACTGCCTATTCGGTCCAGCGCTTCCCTCCACCGCAG	CCTGCGGTGGAGGGAAGCGCTGGACCGAATAGGCAGTTTGCTGGG
mir204_BindingSite_2	CGGCTCCATACCCCTCGGTCCAGTCGACGACACAGC	GCTGTGTCGTCGACTGGACCGAGGGGTATGGAGCCG
mir204_BindingSite_3	TACTCCCAGCAGCCATCGGTCCCTCCACATCAGCAGTC	GACTGCTGATGTGGAGGGACCGATGGCTGCTGGGAGTA
mir204_BindingSite_4	CACCCTCGACGCTCTCGGTCCAGGCTGCGTATCCTC	GAGGATACGCAGCCTGGACCGAGAGCGTCGAGGGTG
# Primer sequences used for Sanger sequencing
Name	Sequences (Forward)	Sequences (Reverse)
Circule3	TATCCCAATGTTCTCGGCCT	CGACGGTATCGATAAGCTTGGA
Luc_cARID1A	AGGTGGGCAAGATCAAGGGG	CCTATTGGCGTTACTATG
# miRCURY LNA miRNA primer used in RT-PCR
Name	Cat. No.	Company
RNU6-1 (or U6) snRNA	YP00203907	Qiagen
hsa-miR-204-3p	YP02113689	Qiagen

## Sheet: siRNA_mimic_inhibitor
Name	Sequences	Company
# siRNA sequences
NC siRNA	UUCUCCGAACGUGUCACGUtt	MDBio
siRNA_circARID1A	UGCCUCCAUCCAGUCCAAUtt	MDBio
# miRNA mimic sequences
Scrambled mimic	GGCAGGUCGAGACGGGAGUAA	Integrated DNA Technologies
hsa-miR-204-3p mimic	GCUGGGAAGGCAAAGGGACGU	TOOLS
# miRNA inhibitor sequences
mirVana™ NC miRNA inhibitor	Cat. NO.4464058	Ambion
mirVana™ hsa-miR-204-3p inhibitor	GCUGGGAAGGCAAAGGGACGU	Ambion

## Sheet: Antibody
# Antibodies
Antibodies	Host	Cat. No.	Company	Dilution
βIII-tubulin	Rabbit	ab18207	Abcam	1:500
GFAP	Rat	13-0300	Invitrogen	1:1000
MKI67	Rabbit	ab15580	Abcam	1:1000
Alexa Fluor 594 Anti-Rat IgG	Goat	A-11007	Invitrogen	1:200
Alexa Fluor 488 Anti-Rabbit IgG	Goat	111-545-144	Jackson ImmunoResearch	1:200
